# Supplementary material for: Enhanced Thermal Insulation and Flame-Retardant Properties of Polyvinyl Alcohol-Based Aerogels Composited with Ammonium Polyphosphate and Chitosan
Source: Hindawi journal article supplement (doi:10.1155/2021/5555916), 2021-05-28
Supplement: f1 [file 5555916.f1.zip]

| APP        |         | CS         |         | APP-CS     |         | PVA        |         |
|------------|---------|------------|---------|------------|---------|------------|---------|
| 3998.53151 | 0.99625 | 3998.53151 | 1       | 3998.53151 | 1.00039 | 3998.53151 | 1.00207 |
| 3997.10244 | 0.99633 | 3997.10244 | 0.99918 | 3997.10244 | 1.00022 | 3997.10244 | 1.00215 |
| 3995.67338 | 0.99651 | 3995.67338 | 0.99868 | 3995.67338 | 1.00004 | 3995.67338 | 1.00207 |
| 3994.24431 | 0.99681 | 3994.24431 | 0.99851 | 3994.24431 | 1.00001 | 3994.24431 | 1.00186 |
| 3992.81524 | 0.99717 | 3992.81524 | 0.99831 | 3992.81524 | 1.00012 | 3992.81524 | 1.00167 |
| 3991.38617 | 0.99755 | 3991.38617 | 0.99808 | 3991.38617 | 1.00021 | 3991.38617 | 1.00155 |
| 3989.9571  | 0.998   | 3989.9571  | 0.99808 | 3989.9571  | 1.00023 | 3989.9571  | 1.00138 |
| 3988.52804 | 0.99844 | 3988.52804 | 0.99819 | 3988.52804 | 1.00032 | 3988.52804 | 1.00122 |
| 3987.09897 | 0.99864 | 3987.09897 | 0.99787 | 3987.09897 | 1.00052 | 3987.09897 | 1.00122 |
| 3985.6699  | 0.99856 | 3985.6699  | 0.997   | 3985.6699  | 1.0007  | 3985.6699  | 1.00141 |
| 3984.24083 | 0.99844 | 3984.24083 | 0.99612 | 3984.24083 | 1.00071 | 3984.24083 | 1.00157 |
| 3982.81177 | 0.99857 | 3982.81177 | 0.99566 | 3982.81177 | 1.00059 | 3982.81177 | 1.00152 |
| 3981.3827  | 0.99889 | 3981.3827  | 0.99549 | 3981.3827  | 1.00048 | 3981.3827  | 1.00134 |
| 3979.95363 | 0.99912 | 3979.95363 | 0.99514 | 3979.95363 | 1.00046 | 3979.95363 | 1.00122 |
| 3978.52456 | 0.99906 | 3978.52456 | 0.99424 | 3978.52456 | 1.00042 | 3978.52456 | 1.00131 |
| 3977.0955  | 0.99881 | 3977.0955  | 0.99306 | 3977.0955  | 1.00022 | 3977.0955  | 1.00144 |
| 3975.66643 | 0.99874 | 3975.66643 | 0.99237 | 3975.66643 | 0.99998 | 3975.66643 | 1.00126 |
| 3974.23736 | 0.99906 | 3974.23736 | 0.99252 | 3974.23736 | 0.99994 | 3974.23736 | 1.00069 |
| 3972.80829 | 0.99955 | 3972.80829 | 0.9929  | 3972.80829 | 1.00013 | 3972.80829 | 1.00012 |
| 3971.37922 | 0.99994 | 3971.37922 | 0.9929  | 3971.37922 | 1.0003  | 3971.37922 | 0.99989 |
| 3969.95016 | 1.00019 | 3969.95016 | 0.99265 | 3969.95016 | 1.0003  | 3969.95016 | 0.99992 |
| 3968.52109 | 1.0004  | 3968.52109 | 0.99242 | 3968.52109 | 1.0003  | 3968.52109 | 1       |
| 3967.09202 | 1.00044 | 3967.09202 | 0.99185 | 3967.09202 | 1.00048 | 3967.09202 | 1.00015 |
| 3965.66295 | 1.00013 | 3965.66295 | 0.99044 | 3965.66295 | 1.00067 | 3965.66295 | 1.0005  |
| 3964.23389 | 0.99959 | 3964.23389 | 0.9886  | 3964.23389 | 1.00056 | 3964.23389 | 1.00083 |
| 3962.80482 | 0.99933 | 3962.80482 | 0.98773 | 3962.80482 | 1.00018 | 3962.80482 | 1.00063 |
| 3961.37575 | 0.99968 | 3961.37575 | 0.98844 | 3961.37575 | 0.99991 | 3961.37575 | 0.99979 |
| 3959.94668 | 1.00027 | 3959.94668 | 0.9895  | 3959.94668 | 0.99997 | 3959.94668 | 0.99896 |
| 3958.51761 | 1.00051 | 3958.51761 | 0.98957 | 3958.51761 | 1.00011 | 3958.51761 | 0.99869 |
| 3957.08855 | 1.00041 | 3957.08855 | 0.98886 | 3957.08855 | 1.00013 | 3957.08855 | 0.99886 |
| 3955.65948 | 1.00022 | 3955.65948 | 0.98796 | 3955.65948 | 1.00009 | 3955.65948 | 0.99916 |
| 3954.23041 | 0.99981 | 3954.23041 | 0.98648 | 3954.23041 | 0.99994 | 3954.23041 | 0.99954 |
| 3952.80134 | 0.99899 | 3952.80134 | 0.98399 | 3952.80134 | 0.99948 | 3952.80134 | 0.99998 |
| 3951.37228 | 0.99808 | 3951.37228 | 0.9815  | 3951.37228 | 0.99872 | 3951.37228 | 1       |
| 3949.94321 | 0.99796 | 3949.94321 | 0.98125 | 3949.94321 | 0.99814 | 3949.94321 | 0.99894 |
| 3948.51414 | 0.99903 | 3948.51414 | 0.98401 | 3948.51414 | 0.99845 | 3948.51414 | 0.99692 |
| 3947.08507 | 1.0002  | 3947.08507 | 0.9865  | 3947.08507 | 0.9995  | 3947.08507 | 0.9955  |
| 3945.65601 | 1       | 3945.65601 | 0.9852  | 3945.65601 | 1       | 3945.65601 | 0.99589 |
| 3944.22694 | 0.99897 | 3944.22694 | 0.98234 | 3944.22694 | 0.99928 | 3944.22694 | 0.99682 |
| 3942.79787 | 0.99911 | 3942.79787 | 0.98317 | 3942.79787 | 0.99857 | 3942.79787 | 0.99605 |
| 3941.3688  | 1.00076 | 3941.3688  | 0.98755 | 3941.3688  | 0.99922 | 3941.3688  | 0.99397 |
| 3939.93973 | 1.00194 | 3939.93973 | 0.98994 | 3939.93973 | 1.00055 | 3939.93973 | 0.99315 |
| 3938.51067 | 1.00139 | 3938.51067 | 0.98792 | 3938.51067 | 1.00112 | 3938.51067 | 0.99446 |
| 3937.0816  | 0.99962 | 3937.0816  | 0.98332 | 3937.0816  | 1.0007  | 3937.0816  | 0.99669 |
| 3935.65253 | 0.99742 | 3935.65253 | 0.97785 | 3935.65253 | 0.99963 | 3935.65253 | 0.99865 |
| 3934.22346 | 0.99553 | 3934.22346 | 0.97335 | 3934.22346 | 0.99811 | 3934.22346 | 0.99936 |
| 3932.7944  | 0.9953  | 3932.7944  | 0.97334 | 3932.7944  | 0.99682 | 3932.7944  | 0.99754 |
| 3931.36533 | 0.99739 | 3931.36533 | 0.97906 | 3931.36533 | 0.997   | 3931.36533 | 0.99351 |
| 3929.93626 | 0.9999  | 3929.93626 | 0.98508 | 3929.93626 | 0.99865 | 3929.93626 | 0.99036 |
| 3928.50719 | 1.00023 | 3928.50719 | 0.98499 | 3928.50719 | 1       | 3928.50719 | 0.99072 |
| 3927.07812 | 0.99831 | 3927.07812 | 0.97972 | 3927.07812 | 0.99966 | 3927.07812 | 0.99326 |
| 3925.64906 | 0.99652 | 3925.64906 | 0.97584 | 3925.64906 | 0.99829 | 3925.64906 | 0.99451 |
| 3924.21999 | 0.99667 | 3924.21999 | 0.97711 | 3924.21999 | 0.99769 | 3924.21999 | 0.99322 |

|            |         |            |         |            |         |            |         |
|------------|---------|------------|---------|------------|---------|------------|---------|
| 3922.79092 | 0.99759 | 3922.79092 | 0.97948 | 3922.79092 | 0.99833 | 3922.79092 | 0.99175 |
| 3921.36185 | 0.99712 | 3921.36185 | 0.97766 | 3921.36185 | 0.99872 | 3921.36185 | 0.99235 |
| 3919.93279 | 0.99546 | 3919.93279 | 0.97337 | 3919.93279 | 0.99792 | 3919.93279 | 0.99372 |
| 3918.50372 | 0.99489 | 3918.50372 | 0.9728  | 3918.50372 | 0.99696 | 3918.50372 | 0.99292 |
| 3917.07465 | 0.99676 | 3917.07465 | 0.97854 | 3917.07465 | 0.99748 | 3917.07465 | 0.98941 |
| 3915.64558 | 0.99946 | 3915.64558 | 0.98569 | 3915.64558 | 0.9995  | 3915.64558 | 0.98604 |
| 3914.21651 | 1.00042 | 3914.21651 | 0.98783 | 3914.21651 | 1.00139 | 3914.21651 | 0.98581 |
| 3912.78745 | 0.99908 | 3912.78745 | 0.98438 | 3912.78745 | 1.00192 | 3912.78745 | 0.98844 |
| 3911.35838 | 0.99682 | 3911.35838 | 0.97911 | 3911.35838 | 1.00132 | 3911.35838 | 0.9915  |
| 3909.92931 | 0.99452 | 3909.92931 | 0.97371 | 3909.92931 | 1.0003  | 3909.92931 | 0.99379 |
| 3908.50024 | 0.99149 | 3908.50024 | 0.966   | 3908.50024 | 0.9986  | 3908.50024 | 0.99624 |
| 3907.07118 | 0.98729 | 3907.07118 | 0.95553 | 3907.07118 | 0.99545 | 3907.07118 | 0.99897 |
| 3905.64211 | 0.98382 | 3905.64211 | 0.94787 | 3905.64211 | 0.99136 | 3905.64211 | 0.99922 |
| 3904.21304 | 0.98404 | 3904.21304 | 0.95    | 3904.21304 | 0.9887  | 3904.21304 | 0.99442 |
| 3902.78397 | 0.98813 | 3902.78397 | 0.96109 | 3902.78397 | 0.98922 | 3902.78397 | 0.986   |
| 3901.35491 | 0.99315 | 3901.35491 | 0.97364 | 3901.35491 | 0.99182 | 3901.35491 | 0.97842 |
| 3899.92584 | 0.99726 | 3899.92584 | 0.98406 | 3899.92584 | 0.99482 | 3899.92584 | 0.97364 |
| 3898.49677 | 1.00003 | 3898.49677 | 0.99136 | 3898.49677 | 0.99783 | 3898.49677 | 0.97178 |
| 3897.0677  | 1       | 3897.0677  | 0.99113 | 3897.0677  | 1.00009 | 3897.0677  | 0.97415 |
| 3895.63863 | 0.99631 | 3895.63863 | 0.98073 | 3895.63863 | 1       | 3895.63863 | 0.98116 |
| 3894.20957 | 0.99034 | 3894.20957 | 0.96561 | 3894.20957 | 0.99712 | 3894.20957 | 0.98932 |
| 3892.7805  | 0.98658 | 3892.7805  | 0.95775 | 3892.7805  | 0.99336 | 3892.7805  | 0.99248 |
| 3891.35143 | 0.98845 | 3891.35143 | 0.9642  | 3891.35143 | 0.99256 | 3891.35143 | 0.98808 |
| 3889.92236 | 0.99221 | 3889.92236 | 0.97326 | 3889.92236 | 0.99519 | 3889.92236 | 0.9828  |
| 3888.4933  | 0.99162 | 3888.4933  | 0.97011 | 3888.4933  | 0.99678 | 3888.4933  | 0.98393 |
| 3887.06423 | 0.98774 | 3887.06423 | 0.96027 | 3887.06423 | 0.99493 | 3887.06423 | 0.98799 |
| 3885.63516 | 0.98651 | 3885.63516 | 0.95899 | 3885.63516 | 0.99262 | 3885.63516 | 0.98689 |
| 3884.20609 | 0.98908 | 3884.20609 | 0.96608 | 3884.20609 | 0.99314 | 3884.20609 | 0.9814  |
| 3882.77702 | 0.99034 | 3882.77702 | 0.96793 | 3882.77702 | 0.9944  | 3882.77702 | 0.9792  |
| 3881.34796 | 0.98971 | 3881.34796 | 0.96611 | 3881.34796 | 0.99407 | 3881.34796 | 0.97985 |
| 3879.91889 | 0.9913  | 3879.91889 | 0.9715  | 3879.91889 | 0.99458 | 3879.91889 | 0.97787 |
| 3878.48982 | 0.99366 | 3878.48982 | 0.97746 | 3878.48982 | 0.99718 | 3878.48982 | 0.97584 |
| 3877.06075 | 0.99181 | 3877.06075 | 0.97138 | 3877.06075 | 0.99812 | 3877.06075 | 0.97925 |
| 3875.63169 | 0.9867  | 3875.63169 | 0.95835 | 3875.63169 | 0.99555 | 3875.63169 | 0.985   |
| 3874.20262 | 0.98283 | 3874.20262 | 0.94992 | 3874.20262 | 0.99215 | 3874.20262 | 0.98735 |
| 3872.77355 | 0.98156 | 3872.77355 | 0.94745 | 3872.77355 | 0.99025 | 3872.77355 | 0.98644 |
| 3871.34448 | 0.98197 | 3871.34448 | 0.94871 | 3871.34448 | 0.98919 | 3871.34448 | 0.98393 |
| 3869.91542 | 0.98514 | 3869.91542 | 0.95742 | 3869.91542 | 0.98946 | 3869.91542 | 0.97819 |
| 3868.48635 | 0.98963 | 3868.48635 | 0.96859 | 3868.48635 | 0.99216 | 3868.48635 | 0.9719  |
| 3867.05728 | 0.99029 | 3867.05728 | 0.96893 | 3867.05728 | 0.99432 | 3867.05728 | 0.97148 |
| 3865.62821 | 0.98724 | 3865.62821 | 0.96099 | 3865.62821 | 0.99317 | 3865.62821 | 0.97526 |
| 3864.19914 | 0.98588 | 3864.19914 | 0.95935 | 3864.19914 | 0.99109 | 3864.19914 | 0.97589 |
| 3862.77008 | 0.9885  | 3862.77008 | 0.96762 | 3862.77008 | 0.99202 | 3862.77008 | 0.97217 |
| 3861.34101 | 0.99085 | 3861.34101 | 0.9735  | 3861.34101 | 0.99512 | 3861.34101 | 0.97024 |
| 3859.91194 | 0.98909 | 3859.91194 | 0.9684  | 3859.91194 | 0.99669 | 3859.91194 | 0.97376 |
| 3858.48287 | 0.98312 | 3858.48287 | 0.95316 | 3858.48287 | 0.995   | 3858.48287 | 0.98185 |
| 3857.05381 | 0.97407 | 3857.05381 | 0.93112 | 3857.05381 | 0.98989 | 3857.05381 | 0.99243 |
| 3855.62474 | 0.96504 | 3855.62474 | 0.91081 | 3855.62474 | 0.98199 | 3855.62474 | 1       |
| 3854.19567 | 0.96489 | 3854.19567 | 0.91457 | 3854.19567 | 0.97583 | 3854.19567 | 0.99311 |
| 3852.7666  | 0.98091 | 3852.7666  | 0.95708 | 3852.7666  | 0.98014 | 3852.7666  | 0.96713 |
| 3851.33753 | 0.99739 | 3851.33753 | 0.99642 | 3851.33753 | 0.99189 | 3851.33753 | 0.94678 |
| 3849.90847 | 1       | 3849.90847 | 1       | 3849.90847 | 0.99923 | 3849.90847 | 0.9487  |
| 3848.4794  | 0.99474 | 3848.4794  | 0.98429 | 3848.4794  | 1       | 3848.4794  | 0.96275 |
| 3847.05033 | 0.98737 | 3847.05033 | 0.9653  | 3847.05033 | 0.99758 | 3847.05033 | 0.97701 |

|            |         |            |         |            |         |            |         |
|------------|---------|------------|---------|------------|---------|------------|---------|
| 3845.62126 | 0.9813  | 3845.62126 | 0.95049 | 3845.62126 | 0.99392 | 3845.62126 | 0.98624 |
| 3844.1922  | 0.9779  | 3844.1922  | 0.9424  | 3844.1922  | 0.99061 | 3844.1922  | 0.98954 |
| 3842.76313 | 0.97699 | 3842.76313 | 0.93979 | 3842.76313 | 0.98838 | 3842.76313 | 0.98877 |
| 3841.33406 | 0.97705 | 3841.33406 | 0.93872 | 3841.33406 | 0.98675 | 3841.33406 | 0.98717 |
| 3839.90499 | 0.97779 | 3839.90499 | 0.93961 | 3839.90499 | 0.98516 | 3839.90499 | 0.98525 |
| 3838.47593 | 0.98151 | 3838.47593 | 0.9489  | 3838.47593 | 0.98516 | 3838.47593 | 0.98014 |
| 3837.04686 | 0.98835 | 3837.04686 | 0.96562 | 3837.04686 | 0.98856 | 3837.04686 | 0.97229 |
| 3835.61779 | 0.99354 | 3835.61779 | 0.97678 | 3835.61779 | 0.99324 | 3835.61779 | 0.96792 |
| 3834.18872 | 0.99443 | 3834.18872 | 0.97698 | 3834.18872 | 0.99588 | 3834.18872 | 0.96989 |
| 3832.75965 | 0.99334 | 3832.75965 | 0.97348 | 3832.75965 | 0.99644 | 3832.75965 | 0.97424 |
| 3831.33059 | 0.9928  | 3831.33059 | 0.97209 | 3831.33059 | 0.99682 | 3831.33059 | 0.97726 |
| 3829.90152 | 0.99235 | 3829.90152 | 0.97051 | 3829.90152 | 0.99739 | 3829.90152 | 0.97971 |
| 3828.47245 | 0.99096 | 3828.47245 | 0.96638 | 3828.47245 | 0.99702 | 3828.47245 | 0.98293 |
| 3827.04338 | 0.98941 | 3827.04338 | 0.96235 | 3827.04338 | 0.99589 | 3827.04338 | 0.98575 |
| 3825.61432 | 0.98788 | 3825.61432 | 0.95822 | 3825.61432 | 0.995   | 3825.61432 | 0.98826 |
| 3824.18525 | 0.98471 | 3824.18525 | 0.94927 | 3824.18525 | 0.99335 | 3824.18525 | 0.99243 |
| 3822.75618 | 0.98104 | 3822.75618 | 0.94001 | 3822.75618 | 0.98952 | 3822.75618 | 0.99513 |
| 3821.32711 | 0.98291 | 3821.32711 | 0.9461  | 3821.32711 | 0.98671 | 3821.32711 | 0.98916 |
| 3819.89804 | 0.99082 | 3819.89804 | 0.96551 | 3819.89804 | 0.98937 | 3819.89804 | 0.97812 |
| 3818.46898 | 0.99555 | 3818.46898 | 0.97433 | 3818.46898 | 0.99367 | 3818.46898 | 0.97471 |
| 3817.03991 | 0.99544 | 3817.03991 | 0.97258 | 3817.03991 | 0.9949  | 3817.03991 | 0.97779 |
| 3815.61084 | 0.99724 | 3815.61084 | 0.97823 | 3815.61084 | 0.99583 | 3815.61084 | 0.97725 |
| 3814.18177 | 1.0015  | 3814.18177 | 0.98927 | 3814.18177 | 0.9994  | 3814.18177 | 0.97388 |
| 3812.75271 | 1.00206 | 3812.75271 | 0.98914 | 3812.75271 | 1.00246 | 3812.75271 | 0.97646 |
| 3811.32364 | 0.9973  | 3811.32364 | 0.97581 | 3811.32364 | 1.00194 | 3811.32364 | 0.98581 |
| 3809.89457 | 0.99042 | 3809.89457 | 0.95865 | 3809.89457 | 0.99828 | 3809.89457 | 0.99587 |
| 3808.4655  | 0.98595 | 3808.4655  | 0.94886 | 3808.4655  | 0.99386 | 3808.4655  | 1       |
| 3807.03644 | 0.98727 | 3807.03644 | 0.95353 | 3807.03644 | 0.99202 | 3807.03644 | 0.9954  |
| 3805.60737 | 0.9913  | 3805.60737 | 0.96282 | 3805.60737 | 0.9935  | 3805.60737 | 0.98863 |
| 3804.1783  | 0.99144 | 3804.1783  | 0.9609  | 3804.1783  | 0.99392 | 3804.1783  | 0.98829 |
| 3802.74923 | 0.9891  | 3802.74923 | 0.95455 | 3802.74923 | 0.991   | 3802.74923 | 0.99043 |
| 3801.32016 | 0.99184 | 3801.32016 | 0.96285 | 3801.32016 | 0.98948 | 3801.32016 | 0.98539 |
| 3799.8911  | 0.99905 | 3799.8911  | 0.98066 | 3799.8911  | 0.99316 | 3799.8911  | 0.9764  |
| 3798.46203 | 1.00225 | 3798.46203 | 0.98681 | 3798.46203 | 0.99731 | 3798.46203 | 0.97451 |
| 3797.03296 | 1.00114 | 3797.03296 | 0.98373 | 3797.03296 | 0.99846 | 3797.03296 | 0.97864 |
| 3795.60389 | 1.00064 | 3795.60389 | 0.98376 | 3795.60389 | 0.99898 | 3795.60389 | 0.98176 |
| 3794.17483 | 1.00125 | 3794.17483 | 0.98588 | 3794.17483 | 1.00055 | 3794.17483 | 0.98351 |
| 3792.74576 | 1.00039 | 3792.74576 | 0.98344 | 3792.74576 | 1.0015  | 3792.74576 | 0.98702 |
| 3791.31669 | 0.99806 | 3791.31669 | 0.97773 | 3791.31669 | 1.00104 | 3791.31669 | 0.99158 |
| 3789.88762 | 0.99597 | 3789.88762 | 0.97309 | 3789.88762 | 0.99996 | 3789.88762 | 0.99473 |
| 3788.45855 | 0.99459 | 3788.45855 | 0.96992 | 3788.45855 | 0.99903 | 3788.45855 | 0.9962  |
| 3787.02949 | 0.99369 | 3787.02949 | 0.96766 | 3787.02949 | 0.99796 | 3787.02949 | 0.99659 |
| 3785.60042 | 0.99378 | 3785.60042 | 0.96819 | 3785.60042 | 0.99703 | 3785.60042 | 0.99557 |
| 3784.17135 | 0.99478 | 3784.17135 | 0.97093 | 3784.17135 | 0.99704 | 3784.17135 | 0.99396 |
| 3782.74228 | 0.99486 | 3782.74228 | 0.97096 | 3782.74228 | 0.99734 | 3782.74228 | 0.99399 |
| 3781.31322 | 0.99355 | 3781.31322 | 0.96794 | 3781.31322 | 0.99658 | 3781.31322 | 0.99519 |
| 3779.88415 | 0.99358 | 3779.88415 | 0.96923 | 3779.88415 | 0.99569 | 3779.88415 | 0.99395 |
| 3778.45508 | 0.9967  | 3778.45508 | 0.97789 | 3778.45508 | 0.99702 | 3778.45508 | 0.98966 |
| 3777.02601 | 0.99989 | 3777.02601 | 0.98523 | 3777.02601 | 1       | 3777.02601 | 0.98699 |
| 3775.59695 | 0.99979 | 3775.59695 | 0.98367 | 3775.59695 | 1.00176 | 3775.59695 | 0.98911 |
| 3774.16788 | 0.99652 | 3774.16788 | 0.9749  | 3774.16788 | 1.00114 | 3774.16788 | 0.99434 |
| 3772.73881 | 0.99223 | 3772.73881 | 0.9646  | 3772.73881 | 0.99858 | 3772.73881 | 0.99913 |
| 3771.30974 | 0.98968 | 3771.30974 | 0.95949 | 3771.30974 | 0.99573 | 3771.30974 | 1.00007 |
| 3769.88067 | 0.991   | 3769.88067 | 0.9641  | 3769.88067 | 0.99488 | 3769.88067 | 0.9958  |

|            |         |            |         |            |         |            |         |
|------------|---------|------------|---------|------------|---------|------------|---------|
| 3768.45161 | 0.99471 | 3768.45161 | 0.97356 | 3768.45161 | 0.99667 | 3768.45161 | 0.98981 |
| 3767.02254 | 0.99727 | 3767.02254 | 0.97939 | 3767.02254 | 0.99892 | 3767.02254 | 0.98668 |
| 3765.59347 | 0.99813 | 3765.59347 | 0.98145 | 3765.59347 | 1.0002  | 3765.59347 | 0.98635 |
| 3764.1644  | 0.99802 | 3764.1644  | 0.98134 | 3764.1644  | 1.00097 | 3764.1644  | 0.98743 |
| 3762.73534 | 0.99603 | 3762.73534 | 0.97611 | 3762.73534 | 1.0008  | 3762.73534 | 0.99052 |
| 3761.30627 | 0.99237 | 3761.30627 | 0.96716 | 3761.30627 | 0.9987  | 3761.30627 | 0.99421 |
| 3759.8772  | 0.99048 | 3759.8772  | 0.96389 | 3759.8772  | 0.99608 | 3759.8772  | 0.99398 |
| 3758.44813 | 0.99264 | 3758.44813 | 0.97058 | 3758.44813 | 0.99591 | 3758.44813 | 0.98899 |
| 3757.01906 | 0.99506 | 3757.01906 | 0.97621 | 3757.01906 | 0.99783 | 3757.01906 | 0.9857  |
| 3755.59    | 0.99292 | 3755.59    | 0.96961 | 3755.59    | 0.99814 | 3755.59    | 0.98911 |
| 3754.16093 | 0.98642 | 3754.16093 | 0.9531  | 3754.16093 | 0.99473 | 3754.16093 | 0.99647 |
| 3752.73186 | 0.98028 | 3752.73186 | 0.93949 | 3752.73186 | 0.9888  | 3752.73186 | 1       |
| 3751.30279 | 0.98176 | 3751.30279 | 0.94605 | 3751.30279 | 0.98514 | 3751.30279 | 0.99252 |
| 3749.87373 | 0.9917  | 3749.87373 | 0.97178 | 3749.87373 | 0.98832 | 3749.87373 | 0.97723 |
| 3748.44466 | 0.9981  | 3748.44466 | 0.9856  | 3748.44466 | 0.99387 | 3748.44466 | 0.9705  |
| 3747.01559 | 0.99507 | 3747.01559 | 0.97624 | 3747.01559 | 0.99462 | 3747.01559 | 0.97701 |
| 3745.58652 | 0.99017 | 3745.58652 | 0.96604 | 3745.58652 | 0.9913  | 3745.58652 | 0.98365 |
| 3744.15745 | 0.99338 | 3744.15745 | 0.97835 | 3744.15745 | 0.99097 | 3744.15745 | 0.97751 |
| 3742.72839 | 1.00146 | 3742.72839 | 0.99976 | 3742.72839 | 0.99622 | 3742.72839 | 0.96632 |
| 3741.29932 | 1.00245 | 3741.29932 | 1.00025 | 3741.29932 | 1       | 3741.29932 | 0.96728 |
| 3739.87025 | 0.99501 | 3739.87025 | 0.98046 | 3739.87025 | 0.99801 | 3739.87025 | 0.97973 |
| 3738.44118 | 0.98496 | 3738.44118 | 0.95681 | 3738.44118 | 0.99144 | 3738.44118 | 0.99232 |
| 3737.01212 | 0.97869 | 3737.01212 | 0.94436 | 3737.01212 | 0.98418 | 3737.01212 | 0.99569 |
| 3735.58305 | 0.98065 | 3735.58305 | 0.95195 | 3735.58305 | 0.98096 | 3735.58305 | 0.98772 |
| 3734.15398 | 0.98932 | 3734.15398 | 0.97441 | 3734.15398 | 0.98392 | 3734.15398 | 0.97521 |
| 3732.72491 | 0.99748 | 3732.72491 | 0.9943  | 3732.72491 | 0.98976 | 3732.72491 | 0.96727 |
| 3731.29585 | 1       | 3731.29585 | 1       | 3731.29585 | 0.99394 | 3731.29585 | 0.96748 |
| 3729.86678 | 0.99801 | 3729.86678 | 0.99251 | 3729.86678 | 0.99471 | 3729.86678 | 0.97404 |
| 3728.43771 | 0.99312 | 3728.43771 | 0.97881 | 3728.43771 | 0.99247 | 3728.43771 | 0.98264 |
| 3727.00864 | 0.9889  | 3727.00864 | 0.96803 | 3727.00864 | 0.98902 | 3727.00864 | 0.98835 |
| 3725.57957 | 0.98812 | 3725.57957 | 0.96624 | 3725.57957 | 0.98695 | 3725.57957 | 0.9886  |
| 3724.15051 | 0.99038 | 3724.15051 | 0.97117 | 3724.15051 | 0.98741 | 3724.15051 | 0.98562 |
| 3722.72144 | 0.9932  | 3722.72144 | 0.97674 | 3722.72144 | 0.98926 | 3722.72144 | 0.98316 |
| 3721.29237 | 0.9955  | 3721.29237 | 0.98109 | 3721.29237 | 0.99149 | 3721.29237 | 0.98216 |
| 3719.8633  | 0.99725 | 3719.8633  | 0.98418 | 3719.8633  | 0.99401 | 3719.8633  | 0.98227 |
| 3718.43424 | 0.99774 | 3718.43424 | 0.98392 | 3718.43424 | 0.9963  | 3718.43424 | 0.98408 |
| 3717.00517 | 0.99599 | 3717.00517 | 0.9779  | 3717.00517 | 0.99726 | 3717.00517 | 0.98829 |
| 3715.5761  | 0.9917  | 3715.5761  | 0.96568 | 3715.5761  | 0.99581 | 3715.5761  | 0.99452 |
| 3714.14703 | 0.98614 | 3714.14703 | 0.951   | 3714.14703 | 0.99142 | 3714.14703 | 1       |
| 3712.71796 | 0.98341 | 3712.71796 | 0.94467 | 3712.71796 | 0.98576 | 3712.71796 | 0.99922 |
| 3711.2889  | 0.98839 | 3711.2889  | 0.95763 | 3711.2889  | 0.98347 | 3711.2889  | 0.98869 |
| 3709.85983 | 0.99832 | 3709.85983 | 0.98102 | 3709.85983 | 0.98684 | 3709.85983 | 0.97567 |
| 3708.43076 | 1.00444 | 3708.43076 | 0.99354 | 3708.43076 | 0.99154 | 3708.43076 | 0.97071 |
| 3707.00169 | 1.00406 | 3707.00169 | 0.9902  | 3707.00169 | 0.99345 | 3707.00169 | 0.97473 |
| 3705.57263 | 0.99966 | 3705.57263 | 0.97781 | 3705.57263 | 0.99204 | 3705.57263 | 0.98271 |
| 3704.14356 | 0.99451 | 3704.14356 | 0.96472 | 3704.14356 | 0.98841 | 3704.14356 | 0.9894  |
| 3702.71449 | 0.99223 | 3702.71449 | 0.95976 | 3702.71449 | 0.9848  | 3702.71449 | 0.99044 |
| 3701.28542 | 0.99452 | 3701.28542 | 0.96573 | 3701.28542 | 0.98384 | 3701.28542 | 0.9857  |
| 3699.85636 | 0.99808 | 3699.85636 | 0.97318 | 3699.85636 | 0.9852  | 3699.85636 | 0.981   |
| 3698.42729 | 0.9989  | 3698.42729 | 0.97309 | 3698.42729 | 0.98605 | 3698.42729 | 0.98078 |
| 3696.99822 | 0.99701 | 3696.99822 | 0.96686 | 3696.99822 | 0.98509 | 3696.99822 | 0.98354 |
| 3695.56915 | 0.99402 | 3695.56915 | 0.95847 | 3695.56915 | 0.9829  | 3695.56915 | 0.98654 |
| 3694.14008 | 0.99033 | 3694.14008 | 0.94837 | 3694.14008 | 0.97976 | 3694.14008 | 0.98921 |
| 3692.71102 | 0.98595 | 3692.71102 | 0.93692 | 3692.71102 | 0.97527 | 3692.71102 | 0.99121 |

|            |         |            |         |            |         |            |         |
|------------|---------|------------|---------|------------|---------|------------|---------|
| 3691.28195 | 0.98296 | 3691.28195 | 0.9302  | 3691.28195 | 0.97008 | 3691.28195 | 0.98984 |
| 3689.85288 | 0.98576 | 3689.85288 | 0.939   | 3689.85288 | 0.96758 | 3689.85288 | 0.9812  |
| 3688.42381 | 0.9949  | 3688.42381 | 0.96238 | 3688.42381 | 0.97072 | 3688.42381 | 0.9672  |
| 3686.99475 | 1.00252 | 3686.99475 | 0.97953 | 3686.99475 | 0.97613 | 3686.99475 | 0.95777 |
| 3685.56568 | 1.0031  | 3685.56568 | 0.97861 | 3685.56568 | 0.97852 | 3685.56568 | 0.95852 |
| 3684.13661 | 0.99942 | 3684.13661 | 0.96628 | 3684.13661 | 0.97698 | 3684.13661 | 0.96545 |
| 3682.70754 | 0.9943  | 3682.70754 | 0.95182 | 3682.70754 | 0.973   | 3682.70754 | 0.97228 |
| 3681.27847 | 0.98984 | 3681.27847 | 0.93943 | 3681.27847 | 0.96804 | 3681.27847 | 0.97587 |
| 3679.84941 | 0.9858  | 3679.84941 | 0.92767 | 3679.84941 | 0.96261 | 3679.84941 | 0.97731 |
| 3678.42034 | 0.98124 | 3678.42034 | 0.91443 | 3678.42034 | 0.95607 | 3678.42034 | 0.97823 |
| 3676.99127 | 0.97865 | 3676.99127 | 0.90725 | 3676.99127 | 0.94884 | 3676.99127 | 0.97463 |
| 3675.5622  | 0.98393 | 3675.5622  | 0.92009 | 3675.5622  | 0.94547 | 3675.5622  | 0.96065 |
| 3674.13314 | 0.99375 | 3674.13314 | 0.9412  | 3674.13314 | 0.94837 | 3674.13314 | 0.9447  |
| 3672.70407 | 0.99657 | 3672.70407 | 0.94273 | 3672.70407 | 0.9504  | 3672.70407 | 0.94095 |
| 3671.275   | 0.993   | 3671.275   | 0.93088 | 3671.275   | 0.94684 | 3671.275   | 0.94447 |
| 3669.84593 | 0.99247 | 3669.84593 | 0.92985 | 3669.84593 | 0.94205 | 3669.84593 | 0.94171 |
| 3668.41687 | 0.99746 | 3668.41687 | 0.94162 | 3668.41687 | 0.94164 | 3668.41687 | 0.93276 |
| 3666.9878  | 1       | 3666.9878  | 0.94488 | 3666.9878  | 0.94301 | 3666.9878  | 0.92947 |
| 3665.55873 | 0.99809 | 3665.55873 | 0.93416 | 3665.55873 | 0.94139 | 3665.55873 | 0.93404 |
| 3664.12966 | 0.99396 | 3664.12966 | 0.91976 | 3664.12966 | 0.93676 | 3664.12966 | 0.93957 |
| 3662.70059 | 0.99092 | 3662.70059 | 0.90895 | 3662.70059 | 0.93125 | 3662.70059 | 0.94154 |
| 3661.27153 | 0.98915 | 3661.27153 | 0.9009  | 3661.27153 | 0.92599 | 3661.27153 | 0.94081 |
| 3659.84246 | 0.98712 | 3659.84246 | 0.89156 | 3659.84246 | 0.92055 | 3659.84246 | 0.94004 |
| 3658.41339 | 0.98478 | 3658.41339 | 0.88159 | 3658.41339 | 0.9143  | 3658.41339 | 0.93879 |
| 3656.98432 | 0.9846  | 3656.98432 | 0.8774  | 3656.98432 | 0.90822 | 3656.98432 | 0.93339 |
| 3655.55526 | 0.98722 | 3655.55526 | 0.87921 | 3655.55526 | 0.90406 | 3655.55526 | 0.92437 |
| 3654.12619 | 0.98784 | 3654.12619 | 0.87464 | 3654.12619 | 0.90053 | 3654.12619 | 0.91925 |
| 3652.69712 | 0.9828  | 3652.69712 | 0.857   | 3652.69712 | 0.89388 | 3652.69712 | 0.92097 |
| 3651.26805 | 0.97551 | 3651.26805 | 0.83691 | 3651.26805 | 0.88318 | 3651.26805 | 0.92158 |
| 3649.83898 | 0.97485 | 3649.83898 | 0.83472 | 3649.83898 | 0.87299 | 3649.83898 | 0.91021 |
| 3648.40992 | 0.98523 | 3648.40992 | 0.857   | 3648.40992 | 0.87    | 3648.40992 | 0.88787 |
| 3646.98085 | 0.9959  | 3646.98085 | 0.87714 | 3646.98085 | 0.87226 | 3646.98085 | 0.87077 |
| 3645.55178 | 0.99781 | 3645.55178 | 0.87611 | 3645.55178 | 0.87255 | 3645.55178 | 0.86759 |
| 3644.12271 | 0.99346 | 3644.12271 | 0.86147 | 3644.12271 | 0.86895 | 3644.12271 | 0.87263 |
| 3642.69365 | 0.98778 | 3642.69365 | 0.84488 | 3642.69365 | 0.86311 | 3642.69365 | 0.87806 |
| 3641.26458 | 0.98383 | 3641.26458 | 0.83281 | 3641.26458 | 0.8571  | 3641.26458 | 0.87981 |
| 3639.83551 | 0.98214 | 3639.83551 | 0.82571 | 3639.83551 | 0.85207 | 3639.83551 | 0.87789 |
| 3638.40644 | 0.98132 | 3638.40644 | 0.8202  | 3638.40644 | 0.84769 | 3638.40644 | 0.87441 |
| 3636.97738 | 0.98013 | 3636.97738 | 0.81382 | 3636.97738 | 0.84301 | 3636.97738 | 0.87074 |
| 3635.54831 | 0.97856 | 3635.54831 | 0.80689 | 3635.54831 | 0.83767 | 3635.54831 | 0.86655 |
| 3634.11924 | 0.97674 | 3634.11924 | 0.79932 | 3634.11924 | 0.83189 | 3634.11924 | 0.86197 |
| 3632.69017 | 0.97367 | 3632.69017 | 0.78847 | 3632.69017 | 0.82555 | 3632.69017 | 0.85889 |
| 3631.2611  | 0.9692  | 3631.2611  | 0.77487 | 3631.2611  | 0.81795 | 3631.2611  | 0.85661 |
| 3629.83204 | 0.96765 | 3629.83204 | 0.7697  | 3629.83204 | 0.81009 | 3629.83204 | 0.84793 |
| 3628.40297 | 0.97471 | 3628.40297 | 0.78441 | 3628.40297 | 0.80644 | 3628.40297 | 0.82803 |
| 3626.9739  | 0.98434 | 3626.9739  | 0.80233 | 3626.9739  | 0.80787 | 3626.9739  | 0.80886 |
| 3625.54483 | 0.98608 | 3625.54483 | 0.80105 | 3625.54483 | 0.80822 | 3625.54483 | 0.80309 |
| 3624.11577 | 0.98054 | 3624.11577 | 0.78484 | 3624.11577 | 0.80441 | 3624.11577 | 0.8065  |
| 3622.6867  | 0.9728  | 3622.6867  | 0.76561 | 3622.6867  | 0.79778 | 3622.6867  | 0.81032 |
| 3621.25763 | 0.96672 | 3621.25763 | 0.75115 | 3621.25763 | 0.79045 | 3621.25763 | 0.8094  |
| 3619.82856 | 0.96529 | 3619.82856 | 0.74705 | 3619.82856 | 0.78457 | 3619.82856 | 0.80152 |
| 3618.39949 | 0.96872 | 3618.39949 | 0.75247 | 3618.39949 | 0.7819  | 3618.39949 | 0.78904 |
| 3616.97043 | 0.97203 | 3616.97043 | 0.75592 | 3616.97043 | 0.78102 | 3616.97043 | 0.77918 |
| 3615.54136 | 0.97134 | 3615.54136 | 0.7506  | 3615.54136 | 0.77875 | 3615.54136 | 0.77519 |

|            |         |            |         |            |         |            |         |
|------------|---------|------------|---------|------------|---------|------------|---------|
| 3614.11229 | 0.96859 | 3614.11229 | 0.74218 | 3614.11229 | 0.77469 | 3614.11229 | 0.77313 |
| 3612.68322 | 0.96679 | 3612.68322 | 0.73655 | 3612.68322 | 0.77062 | 3612.68322 | 0.7693  |
| 3611.25416 | 0.96587 | 3611.25416 | 0.73237 | 3611.25416 | 0.76706 | 3611.25416 | 0.76421 |
| 3609.82509 | 0.96493 | 3609.82509 | 0.72808 | 3609.82509 | 0.76308 | 3609.82509 | 0.75855 |
| 3608.39602 | 0.9651  | 3608.39602 | 0.72679 | 3608.39602 | 0.759   | 3608.39602 | 0.75098 |
| 3606.96695 | 0.96673 | 3606.96695 | 0.7286  | 3606.96695 | 0.75614 | 3606.96695 | 0.74229 |
| 3605.53789 | 0.9672  | 3605.53789 | 0.7272  | 3605.53789 | 0.75401 | 3605.53789 | 0.73622 |
| 3604.10882 | 0.96467 | 3604.10882 | 0.71931 | 3604.10882 | 0.75079 | 3604.10882 | 0.73381 |
| 3602.67975 | 0.96059 | 3602.67975 | 0.70903 | 3602.67975 | 0.746   | 3602.67975 | 0.73191 |
| 3601.25068 | 0.95769 | 3601.25068 | 0.70199 | 3601.25068 | 0.74101 | 3601.25068 | 0.72741 |
| 3599.82161 | 0.95682 | 3599.82161 | 0.69891 | 3599.82161 | 0.73717 | 3599.82161 | 0.72061 |
| 3598.39255 | 0.95638 | 3598.39255 | 0.69602 | 3598.39255 | 0.73413 | 3598.39255 | 0.71386 |
| 3596.96348 | 0.95527 | 3596.96348 | 0.69163 | 3596.96348 | 0.73082 | 3596.96348 | 0.7079  |
| 3595.53441 | 0.95445 | 3595.53441 | 0.68842 | 3595.53441 | 0.7273  | 3595.53441 | 0.7014  |
| 3594.10534 | 0.95474 | 3594.10534 | 0.68778 | 3594.10534 | 0.72449 | 3594.10534 | 0.694   |
| 3592.67628 | 0.95455 | 3592.67628 | 0.68564 | 3592.67628 | 0.72231 | 3592.67628 | 0.68787 |
| 3591.24721 | 0.95179 | 3591.24721 | 0.67776 | 3591.24721 | 0.71929 | 3591.24721 | 0.6847  |
| 3589.81814 | 0.94721 | 3589.81814 | 0.66702 | 3589.81814 | 0.71451 | 3589.81814 | 0.68211 |
| 3588.38907 | 0.94492 | 3588.38907 | 0.66252 | 3588.38907 | 0.70932 | 3588.38907 | 0.67532 |
| 3586.96    | 0.94801 | 3586.96    | 0.66914 | 3586.96    | 0.70667 | 3586.96    | 0.66343 |
| 3585.53094 | 0.95276 | 3585.53094 | 0.67733 | 3585.53094 | 0.70677 | 3585.53094 | 0.65243 |
| 3584.10187 | 0.95362 | 3584.10187 | 0.67652 | 3584.10187 | 0.70651 | 3584.10187 | 0.64703 |
| 3582.6728  | 0.9507  | 3582.6728  | 0.66873 | 3582.6728  | 0.70427 | 3582.6728  | 0.64518 |
| 3581.24373 | 0.94701 | 3581.24373 | 0.66043 | 3581.24373 | 0.70079 | 3581.24373 | 0.6429  |
| 3579.81467 | 0.94443 | 3579.81467 | 0.65471 | 3579.81467 | 0.69725 | 3579.81467 | 0.63856 |
| 3578.3856  | 0.94305 | 3578.3856  | 0.6511  | 3578.3856  | 0.69417 | 3578.3856  | 0.63289 |
| 3576.95653 | 0.94215 | 3576.95653 | 0.64825 | 3576.95653 | 0.69143 | 3576.95653 | 0.62698 |
| 3575.52746 | 0.94127 | 3575.52746 | 0.64556 | 3575.52746 | 0.68879 | 3575.52746 | 0.62117 |
| 3574.09839 | 0.94019 | 3574.09839 | 0.64274 | 3574.09839 | 0.68619 | 3574.09839 | 0.61551 |
| 3572.66933 | 0.93832 | 3572.66933 | 0.63834 | 3572.66933 | 0.68336 | 3572.66933 | 0.61057 |
| 3571.24026 | 0.93488 | 3571.24026 | 0.63076 | 3571.24026 | 0.67957 | 3571.24026 | 0.60681 |
| 3569.81119 | 0.93039 | 3569.81119 | 0.62147 | 3569.81119 | 0.67446 | 3569.81119 | 0.603   |
| 3568.38212 | 0.92773 | 3568.38212 | 0.61659 | 3568.38212 | 0.6692  | 3568.38212 | 0.59615 |
| 3566.95306 | 0.93008 | 3566.95306 | 0.62163 | 3566.95306 | 0.66626 | 3566.95306 | 0.58498 |
| 3565.52399 | 0.93545 | 3565.52399 | 0.63129 | 3565.52399 | 0.66629 | 3565.52399 | 0.57346 |
| 3564.09492 | 0.93806 | 3564.09492 | 0.63456 | 3564.09492 | 0.66661 | 3564.09492 | 0.56653 |
| 3562.66585 | 0.9364  | 3562.66585 | 0.6301  | 3562.66585 | 0.66514 | 3562.66585 | 0.56371 |
| 3561.23679 | 0.93313 | 3561.23679 | 0.62363 | 3561.23679 | 0.66237 | 3561.23679 | 0.56144 |
| 3559.80772 | 0.93067 | 3559.80772 | 0.61901 | 3559.80772 | 0.6596  | 3559.80772 | 0.55782 |
| 3558.37865 | 0.92914 | 3558.37865 | 0.61578 | 3558.37865 | 0.65732 | 3558.37865 | 0.55328 |
| 3556.94958 | 0.92747 | 3556.94958 | 0.61197 | 3556.94958 | 0.65506 | 3556.94958 | 0.54879 |
| 3555.52051 | 0.92527 | 3555.52051 | 0.6073  | 3555.52051 | 0.65236 | 3555.52051 | 0.54451 |
| 3554.09145 | 0.92323 | 3554.09145 | 0.60346 | 3554.09145 | 0.64925 | 3554.09145 | 0.53978 |
| 3552.66238 | 0.92227 | 3552.66238 | 0.60201 | 3552.66238 | 0.64634 | 3552.66238 | 0.53408 |
| 3551.23331 | 0.92203 | 3551.23331 | 0.60165 | 3551.23331 | 0.64408 | 3551.23331 | 0.52813 |
| 3549.80424 | 0.92102 | 3549.80424 | 0.59934 | 3549.80424 | 0.64192 | 3549.80424 | 0.52315 |
| 3548.37518 | 0.91885 | 3548.37518 | 0.59505 | 3548.37518 | 0.63905 | 3548.37518 | 0.51893 |
| 3546.94611 | 0.9171  | 3546.94611 | 0.59235 | 3546.94611 | 0.6358  | 3546.94611 | 0.51396 |
| 3545.51704 | 0.91721 | 3545.51704 | 0.59333 | 3545.51704 | 0.63329 | 3545.51704 | 0.50763 |
| 3544.08797 | 0.91826 | 3544.08797 | 0.59536 | 3544.08797 | 0.63185 | 3544.08797 | 0.50122 |
| 3542.6589  | 0.91838 | 3542.6589  | 0.59482 | 3542.6589  | 0.6307  | 3542.6589  | 0.49619 |
| 3541.22984 | 0.91693 | 3541.22984 | 0.59122 | 3541.22984 | 0.62902 | 3541.22984 | 0.49256 |
| 3539.80077 | 0.91451 | 3539.80077 | 0.58633 | 3539.80077 | 0.62661 | 3539.80077 | 0.4894  |
| 3538.3717  | 0.9121  | 3538.3717  | 0.58223 | 3538.3717  | 0.62385 | 3538.3717  | 0.48577 |

|            |         |            |         |            |         |            |         |
|------------|---------|------------|---------|------------|---------|------------|---------|
| 3536.94263 | 0.91049 | 3536.94263 | 0.58    | 3536.94263 | 0.62138 | 3536.94263 | 0.48133 |
| 3535.51357 | 0.90966 | 3535.51357 | 0.57896 | 3535.51357 | 0.6195  | 3535.51357 | 0.47643 |
| 3534.0845  | 0.90879 | 3534.0845  | 0.5773  | 3534.0845  | 0.61781 | 3534.0845  | 0.4718  |
| 3532.65543 | 0.90717 | 3532.65543 | 0.5741  | 3532.65543 | 0.61564 | 3532.65543 | 0.46779 |
| 3531.22636 | 0.90499 | 3531.22636 | 0.57019 | 3531.22636 | 0.61281 | 3531.22636 | 0.46399 |
| 3529.7973  | 0.9031  | 3529.7973  | 0.56725 | 3529.7973  | 0.60983 | 3529.7973  | 0.45972 |
| 3528.36823 | 0.90209 | 3528.36823 | 0.56606 | 3528.36823 | 0.60744 | 3528.36823 | 0.45492 |
| 3526.93916 | 0.90155 | 3526.93916 | 0.56576 | 3526.93916 | 0.60569 | 3526.93916 | 0.45013 |
| 3525.51009 | 0.90084 | 3525.51009 | 0.56524 | 3525.51009 | 0.60408 | 3525.51009 | 0.44577 |
| 3524.08102 | 0.89996 | 3524.08102 | 0.56452 | 3524.08102 | 0.60235 | 3524.08102 | 0.44171 |
| 3522.65196 | 0.89921 | 3522.65196 | 0.56378 | 3522.65196 | 0.60067 | 3522.65196 | 0.43776 |
| 3521.22289 | 0.89838 | 3521.22289 | 0.56245 | 3521.22289 | 0.59901 | 3521.22289 | 0.43401 |
| 3519.79382 | 0.89706 | 3519.79382 | 0.56013 | 3519.79382 | 0.59719 | 3519.79382 | 0.43063 |
| 3518.36475 | 0.89531 | 3518.36475 | 0.55744 | 3518.36475 | 0.59518 | 3518.36475 | 0.42739 |
| 3516.93569 | 0.89349 | 3516.93569 | 0.55515 | 3516.93569 | 0.5932  | 3516.93569 | 0.42406 |
| 3515.50662 | 0.89175 | 3515.50662 | 0.55318 | 3515.50662 | 0.59133 | 3515.50662 | 0.4207  |
| 3514.07755 | 0.8899  | 3514.07755 | 0.55088 | 3514.07755 | 0.58941 | 3514.07755 | 0.41752 |
| 3512.64848 | 0.8879  | 3512.64848 | 0.54811 | 3512.64848 | 0.58729 | 3512.64848 | 0.41438 |
| 3511.21941 | 0.88615 | 3511.21941 | 0.54577 | 3511.21941 | 0.58515 | 3511.21941 | 0.41097 |
| 3509.79035 | 0.88509 | 3509.79035 | 0.54475 | 3509.79035 | 0.58327 | 3509.79035 | 0.40718 |
| 3508.36128 | 0.88436 | 3508.36128 | 0.5443  | 3508.36128 | 0.58167 | 3508.36128 | 0.4034  |
| 3506.93221 | 0.88301 | 3506.93221 | 0.54275 | 3506.93221 | 0.57992 | 3506.93221 | 0.40021 |
| 3505.50314 | 0.88079 | 3505.50314 | 0.54006 | 3505.50314 | 0.57774 | 3505.50314 | 0.39753 |
| 3504.07408 | 0.8787  | 3504.07408 | 0.53824 | 3504.07408 | 0.57548 | 3504.07408 | 0.39458 |
| 3502.64501 | 0.87771 | 3502.64501 | 0.53844 | 3502.64501 | 0.5738  | 3502.64501 | 0.39104 |
| 3501.21594 | 0.8773  | 3501.21594 | 0.539   | 3501.21594 | 0.57267 | 3501.21594 | 0.3875  |
| 3499.78687 | 0.87622 | 3499.78687 | 0.53785 | 3499.78687 | 0.57145 | 3499.78687 | 0.38462 |
| 3498.35781 | 0.87425 | 3498.35781 | 0.53529 | 3498.35781 | 0.56985 | 3498.35781 | 0.38221 |
| 3496.92874 | 0.87223 | 3496.92874 | 0.53296 | 3496.92874 | 0.56815 | 3496.92874 | 0.37975 |
| 3495.49967 | 0.8707  | 3495.49967 | 0.53151 | 3495.49967 | 0.5666  | 3495.49967 | 0.37704 |
| 3494.0706  | 0.86941 | 3494.0706  | 0.53035 | 3494.0706  | 0.56507 | 3494.0706  | 0.37428 |
| 3492.64153 | 0.86787 | 3492.64153 | 0.52871 | 3492.64153 | 0.56343 | 3492.64153 | 0.37173 |
| 3491.21247 | 0.86594 | 3491.21247 | 0.52659 | 3491.21247 | 0.56168 | 3491.21247 | 0.36936 |
| 3489.7834  | 0.86395 | 3489.7834  | 0.52472 | 3489.7834  | 0.55993 | 3489.7834  | 0.36693 |
| 3488.35433 | 0.86226 | 3488.35433 | 0.52367 | 3488.35433 | 0.55832 | 3488.35433 | 0.36431 |
| 3486.92526 | 0.86085 | 3486.92526 | 0.52296 | 3486.92526 | 0.55679 | 3486.92526 | 0.36167 |
| 3485.4962  | 0.85929 | 3485.4962  | 0.52162 | 3485.4962  | 0.55514 | 3485.4962  | 0.35924 |
| 3484.06713 | 0.85743 | 3484.06713 | 0.51972 | 3484.06713 | 0.55328 | 3484.06713 | 0.35699 |
| 3482.63806 | 0.85568 | 3482.63806 | 0.51847 | 3482.63806 | 0.5514  | 3482.63806 | 0.35463 |
| 3481.20899 | 0.85445 | 3481.20899 | 0.51845 | 3481.20899 | 0.54985 | 3481.20899 | 0.35207 |
| 3479.77992 | 0.85345 | 3479.77992 | 0.51858 | 3479.77992 | 0.54867 | 3479.77992 | 0.34963 |
| 3478.35086 | 0.85205 | 3478.35086 | 0.51753 | 3478.35086 | 0.54746 | 3478.35086 | 0.34757 |
| 3476.92179 | 0.85015 | 3476.92179 | 0.5155  | 3476.92179 | 0.54594 | 3476.92179 | 0.34572 |
| 3475.49272 | 0.84822 | 3475.49272 | 0.51373 | 3475.49272 | 0.54435 | 3475.49272 | 0.34377 |
| 3474.06365 | 0.84658 | 3474.06365 | 0.51275 | 3474.06365 | 0.54298 | 3474.06365 | 0.3417  |
| 3472.63459 | 0.84505 | 3472.63459 | 0.5122  | 3472.63459 | 0.54175 | 3472.63459 | 0.33968 |
| 3471.20552 | 0.84337 | 3471.20552 | 0.51167 | 3471.20552 | 0.54038 | 3471.20552 | 0.33783 |
| 3469.77645 | 0.84153 | 3469.77645 | 0.51105 | 3469.77645 | 0.53885 | 3469.77645 | 0.33613 |
| 3468.34738 | 0.83971 | 3468.34738 | 0.51032 | 3468.34738 | 0.53741 | 3468.34738 | 0.33438 |
| 3466.91832 | 0.83803 | 3466.91832 | 0.50943 | 3466.91832 | 0.53625 | 3466.91832 | 0.33252 |
| 3465.48925 | 0.8364  | 3465.48925 | 0.50829 | 3465.48925 | 0.53523 | 3465.48925 | 0.33064 |
| 3464.06018 | 0.83472 | 3464.06018 | 0.50709 | 3464.06018 | 0.53402 | 3464.06018 | 0.32883 |
| 3462.63111 | 0.83311 | 3462.63111 | 0.50631 | 3462.63111 | 0.53261 | 3462.63111 | 0.32706 |
| 3461.20204 | 0.83167 | 3461.20204 | 0.50603 | 3461.20204 | 0.53126 | 3461.20204 | 0.32534 |

|            |         |            |         |            |         |            |         |
|------------|---------|------------|---------|------------|---------|------------|---------|
| 3459.77298 | 0.83024 | 3459.77298 | 0.50571 | 3459.77298 | 0.5301  | 3459.77298 | 0.32374 |
| 3458.34391 | 0.82861 | 3458.34391 | 0.50494 | 3458.34391 | 0.52902 | 3458.34391 | 0.32226 |
| 3456.91484 | 0.82686 | 3456.91484 | 0.50398 | 3456.91484 | 0.52793 | 3456.91484 | 0.32082 |
| 3455.48577 | 0.82509 | 3455.48577 | 0.50319 | 3455.48577 | 0.52681 | 3455.48577 | 0.31935 |
| 3454.05671 | 0.82331 | 3454.05671 | 0.50262 | 3454.05671 | 0.52563 | 3454.05671 | 0.31787 |
| 3452.62764 | 0.82144 | 3452.62764 | 0.502   | 3452.62764 | 0.5244  | 3452.62764 | 0.31648 |
| 3451.19857 | 0.81936 | 3451.19857 | 0.50101 | 3451.19857 | 0.5231  | 3451.19857 | 0.31524 |
| 3449.7695  | 0.81711 | 3449.7695  | 0.49983 | 3449.7695  | 0.52173 | 3449.7695  | 0.31404 |
| 3448.34043 | 0.8151  | 3448.34043 | 0.49937 | 3448.34043 | 0.52047 | 3448.34043 | 0.31265 |
| 3446.91137 | 0.81371 | 3446.91137 | 0.50015 | 3446.91137 | 0.51959 | 3446.91137 | 0.31107 |
| 3445.4823  | 0.81266 | 3445.4823  | 0.50126 | 3445.4823  | 0.51903 | 3445.4823  | 0.30959 |
| 3444.05323 | 0.81137 | 3444.05323 | 0.50154 | 3444.05323 | 0.5184  | 3444.05323 | 0.30844 |
| 3442.62416 | 0.80972 | 3442.62416 | 0.50119 | 3442.62416 | 0.51751 | 3442.62416 | 0.30748 |
| 3441.1951  | 0.80798 | 3441.1951  | 0.50104 | 3441.1951  | 0.51655 | 3441.1951  | 0.3065  |
| 3439.76603 | 0.80629 | 3439.76603 | 0.50124 | 3439.76603 | 0.51568 | 3439.76603 | 0.30558 |
| 3438.33696 | 0.80455 | 3438.33696 | 0.50148 | 3438.33696 | 0.51481 | 3438.33696 | 0.30487 |
| 3436.90789 | 0.80277 | 3436.90789 | 0.50157 | 3436.90789 | 0.51378 | 3436.90789 | 0.30429 |
| 3435.47883 | 0.80103 | 3435.47883 | 0.50147 | 3435.47883 | 0.51261 | 3435.47883 | 0.30368 |
| 3434.04976 | 0.7993  | 3434.04976 | 0.50119 | 3434.04976 | 0.51145 | 3434.04976 | 0.30297 |
| 3432.62069 | 0.79754 | 3432.62069 | 0.50094 | 3432.62069 | 0.51042 | 3432.62069 | 0.30216 |
| 3431.19162 | 0.79578 | 3431.19162 | 0.50096 | 3431.19162 | 0.50957 | 3431.19162 | 0.30127 |
| 3429.76255 | 0.79401 | 3429.76255 | 0.50113 | 3429.76255 | 0.50885 | 3429.76255 | 0.3004  |
| 3428.33349 | 0.79221 | 3428.33349 | 0.50116 | 3428.33349 | 0.50816 | 3428.33349 | 0.29959 |
| 3426.90442 | 0.79036 | 3426.90442 | 0.50096 | 3426.90442 | 0.50746 | 3426.90442 | 0.29886 |
| 3425.47535 | 0.78844 | 3425.47535 | 0.50058 | 3425.47535 | 0.50678 | 3425.47535 | 0.29824 |
| 3424.04628 | 0.78642 | 3424.04628 | 0.50019 | 3424.04628 | 0.50615 | 3424.04628 | 0.29772 |
| 3422.61722 | 0.78442 | 3422.61722 | 0.5002  | 3422.61722 | 0.50563 | 3422.61722 | 0.29718 |
| 3421.18815 | 0.78267 | 3421.18815 | 0.50094 | 3421.18815 | 0.50531 | 3421.18815 | 0.29656 |
| 3419.75908 | 0.78116 | 3419.75908 | 0.50213 | 3419.75908 | 0.50512 | 3419.75908 | 0.29592 |
| 3418.33001 | 0.77958 | 3418.33001 | 0.50303 | 3418.33001 | 0.5049  | 3418.33001 | 0.29543 |
| 3416.90094 | 0.7777  | 3416.90094 | 0.50335 | 3416.90094 | 0.50452 | 3416.90094 | 0.29516 |
| 3415.47188 | 0.77558 | 3415.47188 | 0.50345 | 3415.47188 | 0.50408 | 3415.47188 | 0.29502 |
| 3414.04281 | 0.77341 | 3414.04281 | 0.50374 | 3414.04281 | 0.50375 | 3414.04281 | 0.2949  |
| 3412.61374 | 0.77131 | 3412.61374 | 0.50422 | 3412.61374 | 0.50358 | 3412.61374 | 0.29473 |
| 3411.18467 | 0.76919 | 3411.18467 | 0.50467 | 3411.18467 | 0.50347 | 3411.18467 | 0.29455 |
| 3409.75561 | 0.76696 | 3409.75561 | 0.50502 | 3409.75561 | 0.50337 | 3409.75561 | 0.29435 |
| 3408.32654 | 0.76465 | 3408.32654 | 0.50528 | 3408.32654 | 0.50329 | 3408.32654 | 0.29412 |
| 3406.89747 | 0.76229 | 3406.89747 | 0.50553 | 3406.89747 | 0.5032  | 3406.89747 | 0.29389 |
| 3405.4684  | 0.75993 | 3405.4684  | 0.50595 | 3405.4684  | 0.50298 | 3405.4684  | 0.29371 |
| 3404.03934 | 0.75762 | 3404.03934 | 0.50673 | 3404.03934 | 0.50262 | 3404.03934 | 0.29362 |
| 3402.61027 | 0.75536 | 3402.61027 | 0.50774 | 3402.61027 | 0.50223 | 3402.61027 | 0.29366 |
| 3401.1812  | 0.75315 | 3401.1812  | 0.50851 | 3401.1812  | 0.50194 | 3401.1812  | 0.29379 |
| 3399.75213 | 0.75097 | 3399.75213 | 0.50878 | 3399.75213 | 0.50178 | 3399.75213 | 0.29389 |
| 3398.32306 | 0.7489  | 3398.32306 | 0.50881 | 3398.32306 | 0.50167 | 3398.32306 | 0.29386 |
| 3396.894   | 0.74695 | 3396.894   | 0.50899 | 3396.894   | 0.50145 | 3396.894   | 0.29373 |
| 3395.46493 | 0.74504 | 3395.46493 | 0.50937 | 3395.46493 | 0.50109 | 3395.46493 | 0.29363 |
| 3394.03586 | 0.74312 | 3394.03586 | 0.50994 | 3394.03586 | 0.50072 | 3394.03586 | 0.29367 |
| 3392.60679 | 0.74126 | 3392.60679 | 0.51071 | 3392.60679 | 0.50047 | 3392.60679 | 0.29379 |
| 3391.17773 | 0.73948 | 3391.17773 | 0.51141 | 3391.17773 | 0.50034 | 3391.17773 | 0.29392 |
| 3389.74866 | 0.73761 | 3389.74866 | 0.51156 | 3389.74866 | 0.50022 | 3389.74866 | 0.29409 |
| 3388.31959 | 0.73552 | 3388.31959 | 0.51116 | 3388.31959 | 0.49999 | 3388.31959 | 0.2943  |
| 3386.89052 | 0.73329 | 3386.89052 | 0.51081 | 3386.89052 | 0.49968 | 3386.89052 | 0.29457 |
| 3385.46145 | 0.7311  | 3385.46145 | 0.51101 | 3385.46145 | 0.49939 | 3385.46145 | 0.29485 |
| 3384.03239 | 0.72896 | 3384.03239 | 0.51169 | 3384.03239 | 0.49922 | 3384.03239 | 0.29515 |



|            |         |            |         |            |         |            |         |
|------------|---------|------------|---------|------------|---------|------------|---------|
| 3382.60332 | 0.72675 | 3382.60332 | 0.51247 | 3382.60332 | 0.49914 | 3382.60332 | 0.29545 |
| 3381.17425 | 0.72438 | 3381.17425 | 0.51305 | 3381.17425 | 0.49903 | 3381.17425 | 0.29581 |
| 3379.74518 | 0.72181 | 3379.74518 | 0.51344 | 3379.74518 | 0.49884 | 3379.74518 | 0.29627 |
| 3378.31612 | 0.71909 | 3378.31612 | 0.51375 | 3378.31612 | 0.49865 | 3378.31612 | 0.29677 |
| 3376.88705 | 0.71633 | 3376.88705 | 0.51409 | 3376.88705 | 0.4985  | 3376.88705 | 0.29727 |
| 3375.45798 | 0.71358 | 3375.45798 | 0.51446 | 3375.45798 | 0.49835 | 3375.45798 | 0.29772 |
| 3374.02891 | 0.71083 | 3374.02891 | 0.51493 | 3374.02891 | 0.49817 | 3374.02891 | 0.29818 |
| 3372.59984 | 0.70805 | 3372.59984 | 0.51558 | 3372.59984 | 0.49795 | 3372.59984 | 0.29873 |
| 3371.17078 | 0.70518 | 3371.17078 | 0.51636 | 3371.17078 | 0.49767 | 3371.17078 | 0.29944 |
| 3369.74171 | 0.70218 | 3369.74171 | 0.51708 | 3369.74171 | 0.4973  | 3369.74171 | 0.3002  |
| 3368.31264 | 0.69913 | 3368.31264 | 0.51771 | 3368.31264 | 0.4969  | 3368.31264 | 0.30091 |
| 3366.88357 | 0.69612 | 3366.88357 | 0.51833 | 3366.88357 | 0.49658 | 3366.88357 | 0.3015  |
| 3365.45451 | 0.69314 | 3365.45451 | 0.51902 | 3365.45451 | 0.49638 | 3365.45451 | 0.30202 |
| 3364.02544 | 0.69016 | 3364.02544 | 0.5198  | 3364.02544 | 0.4962  | 3364.02544 | 0.30258 |
| 3362.59637 | 0.68713 | 3362.59637 | 0.5207  | 3362.59637 | 0.49587 | 3362.59637 | 0.30323 |
| 3361.1673  | 0.68407 | 3361.1673  | 0.52169 | 3361.1673  | 0.49534 | 3361.1673  | 0.30396 |
| 3359.73824 | 0.68097 | 3359.73824 | 0.52264 | 3359.73824 | 0.49469 | 3359.73824 | 0.30474 |
| 3358.30917 | 0.6778  | 3358.30917 | 0.52351 | 3358.30917 | 0.49402 | 3358.30917 | 0.30553 |
| 3356.8801  | 0.67451 | 3356.8801  | 0.52444 | 3356.8801  | 0.49337 | 3356.8801  | 0.30628 |
| 3355.45103 | 0.67113 | 3355.45103 | 0.52568 | 3355.45103 | 0.49281 | 3355.45103 | 0.307   |
| 3354.02196 | 0.66768 | 3354.02196 | 0.52719 | 3354.02196 | 0.49239 | 3354.02196 | 0.30776 |
| 3352.5929  | 0.6641  | 3352.5929  | 0.52875 | 3352.5929  | 0.49206 | 3352.5929  | 0.30865 |
| 3351.16383 | 0.66039 | 3351.16383 | 0.53016 | 3351.16383 | 0.49171 | 3351.16383 | 0.30964 |
| 3349.73476 | 0.65659 | 3349.73476 | 0.53136 | 3349.73476 | 0.49127 | 3349.73476 | 0.31065 |
| 3348.30569 | 0.65274 | 3348.30569 | 0.53249 | 3348.30569 | 0.49072 | 3348.30569 | 0.31156 |
| 3346.87663 | 0.64882 | 3346.87663 | 0.53373 | 3346.87663 | 0.49007 | 3346.87663 | 0.31237 |
| 3345.44756 | 0.64482 | 3345.44756 | 0.53521 | 3345.44756 | 0.48929 | 3345.44756 | 0.31314 |
| 3344.01849 | 0.64069 | 3344.01849 | 0.53685 | 3344.01849 | 0.48834 | 3344.01849 | 0.31394 |
| 3342.58942 | 0.63646 | 3342.58942 | 0.53852 | 3342.58942 | 0.48731 | 3342.58942 | 0.31479 |
| 3341.16035 | 0.63217 | 3341.16035 | 0.54014 | 3341.16035 | 0.48636 | 3341.16035 | 0.31568 |
| 3339.73129 | 0.62779 | 3339.73129 | 0.54166 | 3339.73129 | 0.48555 | 3339.73129 | 0.31663 |
| 3338.30222 | 0.62334 | 3338.30222 | 0.54307 | 3338.30222 | 0.48479 | 3338.30222 | 0.31758 |
| 3336.87315 | 0.6189  | 3336.87315 | 0.54447 | 3336.87315 | 0.48401 | 3336.87315 | 0.31846 |
| 3335.44408 | 0.6145  | 3335.44408 | 0.54596 | 3335.44408 | 0.48328 | 3335.44408 | 0.31927 |
| 3334.01502 | 0.61009 | 3334.01502 | 0.54746 | 3334.01502 | 0.48256 | 3334.01502 | 0.32006 |
| 3332.58595 | 0.60558 | 3332.58595 | 0.54884 | 3332.58595 | 0.48166 | 3332.58595 | 0.32089 |
| 3331.15688 | 0.60094 | 3331.15688 | 0.55006 | 3331.15688 | 0.48056 | 3331.15688 | 0.32175 |
| 3329.72781 | 0.5962  | 3329.72781 | 0.55129 | 3329.72781 | 0.47942 | 3329.72781 | 0.32261 |
| 3328.29875 | 0.5915  | 3328.29875 | 0.55266 | 3328.29875 | 0.47841 | 3328.29875 | 0.32349 |
| 3326.86968 | 0.58692 | 3326.86968 | 0.55412 | 3326.86968 | 0.47749 | 3326.86968 | 0.32443 |
| 3325.44061 | 0.5824  | 3325.44061 | 0.55551 | 3325.44061 | 0.47653 | 3325.44061 | 0.32542 |
| 3324.01154 | 0.57785 | 3324.01154 | 0.55668 | 3324.01154 | 0.47546 | 3324.01154 | 0.3264  |
| 3322.58247 | 0.57321 | 3322.58247 | 0.55765 | 3322.58247 | 0.47433 | 3322.58247 | 0.32737 |
| 3321.15341 | 0.56846 | 3321.15341 | 0.55851 | 3321.15341 | 0.4732  | 3321.15341 | 0.32834 |
| 3319.72434 | 0.56367 | 3319.72434 | 0.55934 | 3319.72434 | 0.47207 | 3319.72434 | 0.32931 |
| 3318.29527 | 0.55891 | 3318.29527 | 0.56017 | 3318.29527 | 0.47097 | 3318.29527 | 0.33027 |
| 3316.8662  | 0.55421 | 3316.8662  | 0.56099 | 3316.8662  | 0.46982 | 3316.8662  | 0.33119 |
| 3315.43714 | 0.54955 | 3315.43714 | 0.56177 | 3315.43714 | 0.46854 | 3315.43714 | 0.33207 |
| 3314.00807 | 0.54489 | 3314.00807 | 0.56258 | 3314.00807 | 0.46708 | 3314.00807 | 0.3329  |
| 3312.579   | 0.54022 | 3312.579   | 0.56346 | 3312.579   | 0.46551 | 3312.579   | 0.33373 |
| 3311.14993 | 0.53556 | 3311.14993 | 0.56446 | 3311.14993 | 0.46395 | 3311.14993 | 0.33464 |
| 3309.72086 | 0.53092 | 3309.72086 | 0.5656  | 3309.72086 | 0.46248 | 3309.72086 | 0.33567 |
| 3308.2918  | 0.52629 | 3308.2918  | 0.56682 | 3308.2918  | 0.46119 | 3308.2918  | 0.33677 |
| 3306.86273 | 0.52162 | 3306.86273 | 0.56784 | 3306.86273 | 0.46014 | 3306.86273 | 0.33788 |

|            |         |            |         |            |         |            |         |
|------------|---------|------------|---------|------------|---------|------------|---------|
| 3305.43366 | 0.51689 | 3305.43366 | 0.56844 | 3305.43366 | 0.45912 | 3305.43366 | 0.33891 |
| 3304.00459 | 0.51214 | 3304.00459 | 0.5687  | 3304.00459 | 0.45786 | 3304.00459 | 0.33984 |
| 3302.57553 | 0.50737 | 3302.57553 | 0.56895 | 3302.57553 | 0.45636 | 3302.57553 | 0.34069 |
| 3301.14646 | 0.50264 | 3301.14646 | 0.5694  | 3301.14646 | 0.45486 | 3301.14646 | 0.34154 |
| 3299.71739 | 0.49798 | 3299.71739 | 0.57011 | 3299.71739 | 0.45345 | 3299.71739 | 0.34244 |
| 3298.28832 | 0.4934  | 3298.28832 | 0.57106 | 3298.28832 | 0.45202 | 3298.28832 | 0.3434  |
| 3296.85926 | 0.48889 | 3296.85926 | 0.57213 | 3296.85926 | 0.45046 | 3296.85926 | 0.34439 |
| 3295.43019 | 0.48441 | 3295.43019 | 0.57309 | 3295.43019 | 0.44877 | 3295.43019 | 0.34544 |
| 3294.00112 | 0.47993 | 3294.00112 | 0.57392 | 3294.00112 | 0.44703 | 3294.00112 | 0.34649 |
| 3292.57205 | 0.4755  | 3292.57205 | 0.57478 | 3292.57205 | 0.44533 | 3292.57205 | 0.34748 |
| 3291.14298 | 0.4711  | 3291.14298 | 0.5757  | 3291.14298 | 0.44377 | 3291.14298 | 0.34834 |
| 3289.71392 | 0.46671 | 3289.71392 | 0.57661 | 3289.71392 | 0.44234 | 3289.71392 | 0.34915 |
| 3288.28485 | 0.46234 | 3288.28485 | 0.57747 | 3288.28485 | 0.441   | 3288.28485 | 0.35    |
| 3286.85578 | 0.45806 | 3286.85578 | 0.57835 | 3286.85578 | 0.43971 | 3286.85578 | 0.35095 |
| 3285.42671 | 0.45393 | 3285.42671 | 0.57932 | 3285.42671 | 0.43836 | 3285.42671 | 0.35195 |
| 3283.99765 | 0.44993 | 3283.99765 | 0.5804  | 3283.99765 | 0.43694 | 3283.99765 | 0.35291 |
| 3282.56858 | 0.44601 | 3282.56858 | 0.58158 | 3282.56858 | 0.43547 | 3282.56858 | 0.35386 |
| 3281.13951 | 0.44208 | 3281.13951 | 0.58279 | 3281.13951 | 0.43407 | 3281.13951 | 0.35489 |
| 3279.71044 | 0.43818 | 3279.71044 | 0.58394 | 3279.71044 | 0.43273 | 3279.71044 | 0.35599 |
| 3278.28137 | 0.43437 | 3278.28137 | 0.58513 | 3278.28137 | 0.43136 | 3278.28137 | 0.35709 |
| 3276.85231 | 0.4307  | 3276.85231 | 0.5865  | 3276.85231 | 0.42993 | 3276.85231 | 0.35812 |
| 3275.42324 | 0.42715 | 3275.42324 | 0.58814 | 3275.42324 | 0.42853 | 3275.42324 | 0.35909 |
| 3273.99417 | 0.4237  | 3273.99417 | 0.58999 | 3273.99417 | 0.42724 | 3273.99417 | 0.3601  |
| 3272.5651  | 0.42032 | 3272.5651  | 0.59184 | 3272.5651  | 0.42605 | 3272.5651  | 0.36121 |
| 3271.13604 | 0.41695 | 3271.13604 | 0.59337 | 3271.13604 | 0.42481 | 3271.13604 | 0.36244 |
| 3269.70697 | 0.41355 | 3269.70697 | 0.59446 | 3269.70697 | 0.42348 | 3269.70697 | 0.36371 |
| 3268.2779  | 0.41012 | 3268.2779  | 0.5953  | 3268.2779  | 0.42207 | 3268.2779  | 0.36491 |
| 3266.84883 | 0.40665 | 3266.84883 | 0.59621 | 3266.84883 | 0.4207  | 3266.84883 | 0.36601 |
| 3265.41977 | 0.40321 | 3265.41977 | 0.59735 | 3265.41977 | 0.41942 | 3265.41977 | 0.36711 |
| 3263.9907  | 0.39984 | 3263.9907  | 0.59865 | 3263.9907  | 0.41817 | 3263.9907  | 0.36827 |
| 3262.56163 | 0.39655 | 3262.56163 | 0.59998 | 3262.56163 | 0.41683 | 3262.56163 | 0.36951 |
| 3261.13256 | 0.39332 | 3261.13256 | 0.60132 | 3261.13256 | 0.41537 | 3261.13256 | 0.37077 |
| 3259.70349 | 0.39013 | 3259.70349 | 0.60272 | 3259.70349 | 0.41386 | 3259.70349 | 0.37201 |
| 3258.27443 | 0.387   | 3258.27443 | 0.60418 | 3258.27443 | 0.41242 | 3258.27443 | 0.37326 |
| 3256.84536 | 0.3839  | 3256.84536 | 0.60566 | 3256.84536 | 0.41106 | 3256.84536 | 0.37456 |
| 3255.41629 | 0.38081 | 3255.41629 | 0.60717 | 3255.41629 | 0.40978 | 3255.41629 | 0.37587 |
| 3253.98722 | 0.37774 | 3253.98722 | 0.60873 | 3253.98722 | 0.40856 | 3253.98722 | 0.37718 |
| 3252.55816 | 0.37472 | 3252.55816 | 0.61028 | 3252.55816 | 0.40742 | 3252.55816 | 0.3785  |
| 3251.12909 | 0.37172 | 3251.12909 | 0.6117  | 3251.12909 | 0.40633 | 3251.12909 | 0.37988 |
| 3249.70002 | 0.36873 | 3249.70002 | 0.61298 | 3249.70002 | 0.40518 | 3249.70002 | 0.38133 |
| 3248.27095 | 0.36573 | 3248.27095 | 0.61417 | 3248.27095 | 0.40392 | 3248.27095 | 0.38284 |
| 3246.84188 | 0.36273 | 3246.84188 | 0.61537 | 3246.84188 | 0.40256 | 3246.84188 | 0.38434 |
| 3245.41282 | 0.35971 | 3245.41282 | 0.61675 | 3245.41282 | 0.40126 | 3245.41282 | 0.38579 |
| 3243.98375 | 0.35671 | 3243.98375 | 0.61827 | 3243.98375 | 0.4001  | 3243.98375 | 0.3872  |
| 3242.55468 | 0.35378 | 3242.55468 | 0.6197  | 3242.55468 | 0.39903 | 3242.55468 | 0.38867 |
| 3241.12561 | 0.35092 | 3241.12561 | 0.62089 | 3241.12561 | 0.39796 | 3241.12561 | 0.39027 |
| 3239.69655 | 0.34811 | 3239.69655 | 0.62203 | 3239.69655 | 0.39683 | 3239.69655 | 0.39199 |
| 3238.26748 | 0.34533 | 3238.26748 | 0.62335 | 3238.26748 | 0.39563 | 3238.26748 | 0.39375 |
| 3236.83841 | 0.3426  | 3236.83841 | 0.62487 | 3236.83841 | 0.39439 | 3236.83841 | 0.39549 |
| 3235.40934 | 0.33996 | 3235.40934 | 0.62646 | 3235.40934 | 0.39317 | 3235.40934 | 0.39722 |
| 3233.98028 | 0.33737 | 3233.98028 | 0.62792 | 3233.98028 | 0.39203 | 3233.98028 | 0.39893 |
| 3232.55121 | 0.33478 | 3232.55121 | 0.62917 | 3232.55121 | 0.39091 | 3232.55121 | 0.40065 |
| 3231.12214 | 0.33217 | 3231.12214 | 0.63029 | 3231.12214 | 0.38972 | 3231.12214 | 0.40239 |
| 3229.69307 | 0.32961 | 3229.69307 | 0.63143 | 3229.69307 | 0.38847 | 3229.69307 | 0.40413 |

|            |         |            |         |            |         |            |         |
|------------|---------|------------|---------|------------|---------|------------|---------|
| 3228.264   | 0.32713 | 3228.264   | 0.63268 | 3228.264   | 0.38726 | 3228.264   | 0.40585 |
| 3226.83494 | 0.32471 | 3226.83494 | 0.63399 | 3226.83494 | 0.38616 | 3226.83494 | 0.40758 |
| 3225.40587 | 0.32234 | 3225.40587 | 0.63522 | 3225.40587 | 0.38516 | 3225.40587 | 0.40939 |
| 3223.9768  | 0.32004 | 3223.9768  | 0.6363  | 3223.9768  | 0.3842  | 3223.9768  | 0.41132 |
| 3222.54773 | 0.31784 | 3222.54773 | 0.63732 | 3222.54773 | 0.38326 | 3222.54773 | 0.41335 |
| 3221.11867 | 0.31579 | 3221.11867 | 0.6385  | 3221.11867 | 0.38234 | 3221.11867 | 0.41538 |
| 3219.6896  | 0.31389 | 3219.6896  | 0.63992 | 3219.6896  | 0.38146 | 3219.6896  | 0.41734 |
| 3218.26053 | 0.31207 | 3218.26053 | 0.64133 | 3218.26053 | 0.3806  | 3218.26053 | 0.41926 |
| 3216.83146 | 0.31026 | 3216.83146 | 0.6425  | 3216.83146 | 0.37984 | 3216.83146 | 0.42126 |
| 3215.40239 | 0.30844 | 3215.40239 | 0.64357 | 3215.40239 | 0.37926 | 3215.40239 | 0.42334 |
| 3213.97333 | 0.30668 | 3213.97333 | 0.64477 | 3213.97333 | 0.37878 | 3213.97333 | 0.42547 |
| 3212.54426 | 0.30505 | 3212.54426 | 0.64606 | 3212.54426 | 0.37823 | 3212.54426 | 0.42768 |
| 3211.11519 | 0.30354 | 3211.11519 | 0.64731 | 3211.11519 | 0.37758 | 3211.11519 | 0.42995 |
| 3209.68612 | 0.30212 | 3209.68612 | 0.6486  | 3209.68612 | 0.37695 | 3209.68612 | 0.4322  |
| 3208.25706 | 0.30078 | 3208.25706 | 0.64998 | 3208.25706 | 0.37637 | 3208.25706 | 0.43442 |
| 3206.82799 | 0.29952 | 3206.82799 | 0.65125 | 3206.82799 | 0.37575 | 3206.82799 | 0.43667 |
| 3205.39892 | 0.2983  | 3205.39892 | 0.65232 | 3205.39892 | 0.37507 | 3205.39892 | 0.43899 |
| 3203.96985 | 0.29716 | 3203.96985 | 0.65329 | 3203.96985 | 0.37449 | 3203.96985 | 0.44137 |
| 3202.54078 | 0.29612 | 3202.54078 | 0.65422 | 3202.54078 | 0.37412 | 3202.54078 | 0.44375 |
| 3201.11172 | 0.29517 | 3201.11172 | 0.6551  | 3201.11172 | 0.37388 | 3201.11172 | 0.44613 |
| 3199.68265 | 0.29429 | 3199.68265 | 0.65602 | 3199.68265 | 0.37362 | 3199.68265 | 0.4485  |
| 3198.25358 | 0.29352 | 3198.25358 | 0.6572  | 3198.25358 | 0.37333 | 3198.25358 | 0.45084 |
| 3196.82451 | 0.29286 | 3196.82451 | 0.65865 | 3196.82451 | 0.37304 | 3196.82451 | 0.45319 |
| 3195.39545 | 0.29232 | 3195.39545 | 0.66008 | 3195.39545 | 0.37284 | 3195.39545 | 0.45563 |
| 3193.96638 | 0.29189 | 3193.96638 | 0.66128 | 3193.96638 | 0.37273 | 3193.96638 | 0.45819 |
| 3192.53731 | 0.29155 | 3192.53731 | 0.66233 | 3192.53731 | 0.37265 | 3192.53731 | 0.46084 |
| 3191.10824 | 0.29134 | 3191.10824 | 0.66343 | 3191.10824 | 0.37254 | 3191.10824 | 0.46351 |
| 3189.67918 | 0.29123 | 3189.67918 | 0.66458 | 3189.67918 | 0.37248 | 3189.67918 | 0.46616 |
| 3188.25011 | 0.29121 | 3188.25011 | 0.66571 | 3188.25011 | 0.37256 | 3188.25011 | 0.46878 |
| 3186.82104 | 0.29127 | 3186.82104 | 0.66686 | 3186.82104 | 0.3728  | 3186.82104 | 0.47139 |
| 3185.39197 | 0.29144 | 3185.39197 | 0.66819 | 3185.39197 | 0.37308 | 3185.39197 | 0.47399 |
| 3183.9629  | 0.29174 | 3183.9629  | 0.66962 | 3183.9629  | 0.37331 | 3183.9629  | 0.47664 |
| 3182.53384 | 0.29214 | 3182.53384 | 0.67089 | 3182.53384 | 0.3735  | 3182.53384 | 0.47934 |
| 3181.10477 | 0.29263 | 3181.10477 | 0.6719  | 3181.10477 | 0.3737  | 3181.10477 | 0.4821  |
| 3179.6757  | 0.29321 | 3179.6757  | 0.67293 | 3179.6757  | 0.37395 | 3179.6757  | 0.48488 |
| 3178.24663 | 0.2939  | 3178.24663 | 0.67433 | 3178.24663 | 0.37431 | 3178.24663 | 0.48764 |
| 3176.81757 | 0.29471 | 3176.81757 | 0.67598 | 3176.81757 | 0.3748  | 3176.81757 | 0.4904  |
| 3175.3885  | 0.29557 | 3175.3885  | 0.67751 | 3175.3885  | 0.37532 | 3175.3885  | 0.49324 |
| 3173.95943 | 0.29644 | 3173.95943 | 0.67879 | 3173.95943 | 0.3758  | 3173.95943 | 0.49616 |
| 3172.53036 | 0.29736 | 3172.53036 | 0.68001 | 3172.53036 | 0.37624 | 3172.53036 | 0.4991  |
| 3171.10129 | 0.29842 | 3171.10129 | 0.68135 | 3171.10129 | 0.37671 | 3171.10129 | 0.50202 |
| 3169.67223 | 0.29964 | 3169.67223 | 0.68278 | 3169.67223 | 0.37727 | 3169.67223 | 0.50493 |
| 3168.24316 | 0.30094 | 3168.24316 | 0.68425 | 3168.24316 | 0.3779  | 3168.24316 | 0.50785 |
| 3166.81409 | 0.30228 | 3166.81409 | 0.68572 | 3166.81409 | 0.37858 | 3166.81409 | 0.5108  |
| 3165.38502 | 0.30367 | 3165.38502 | 0.68719 | 3165.38502 | 0.37924 | 3165.38502 | 0.51375 |
| 3163.95596 | 0.30512 | 3163.95596 | 0.68865 | 3163.95596 | 0.37988 | 3163.95596 | 0.51672 |
| 3162.52689 | 0.30667 | 3162.52689 | 0.69008 | 3162.52689 | 0.38053 | 3162.52689 | 0.51972 |
| 3161.09782 | 0.30826 | 3161.09782 | 0.69149 | 3161.09782 | 0.38128 | 3161.09782 | 0.52275 |
| 3159.66875 | 0.30988 | 3159.66875 | 0.69289 | 3159.66875 | 0.38217 | 3159.66875 | 0.5258  |
| 3158.23969 | 0.3115  | 3158.23969 | 0.69433 | 3158.23969 | 0.3832  | 3158.23969 | 0.52884 |
| 3156.81062 | 0.31314 | 3156.81062 | 0.69585 | 3156.81062 | 0.38427 | 3156.81062 | 0.53189 |
| 3155.38155 | 0.31483 | 3155.38155 | 0.69748 | 3155.38155 | 0.38523 | 3155.38155 | 0.53499 |
| 3153.95248 | 0.31655 | 3153.95248 | 0.69913 | 3153.95248 | 0.38603 | 3153.95248 | 0.53814 |
| 3152.52341 | 0.31824 | 3152.52341 | 0.70068 | 3152.52341 | 0.38672 | 3152.52341 | 0.5413  |

|            |         |            |         |            |         |            |         |
|------------|---------|------------|---------|------------|---------|------------|---------|
| 3151.09435 | 0.31986 | 3151.09435 | 0.70205 | 3151.09435 | 0.3874  | 3151.09435 | 0.54447 |
| 3149.66528 | 0.3214  | 3149.66528 | 0.70333 | 3149.66528 | 0.38815 | 3149.66528 | 0.54769 |
| 3148.23621 | 0.32285 | 3148.23621 | 0.70461 | 3148.23621 | 0.38892 | 3148.23621 | 0.55095 |
| 3146.80714 | 0.32422 | 3146.80714 | 0.70593 | 3146.80714 | 0.38962 | 3146.80714 | 0.55423 |
| 3145.37808 | 0.32552 | 3145.37808 | 0.70729 | 3145.37808 | 0.39016 | 3145.37808 | 0.55749 |
| 3143.94901 | 0.32677 | 3143.94901 | 0.70873 | 3143.94901 | 0.39057 | 3143.94901 | 0.56074 |
| 3142.51994 | 0.32798 | 3142.51994 | 0.71029 | 3142.51994 | 0.39094 | 3142.51994 | 0.56399 |
| 3141.09087 | 0.32913 | 3141.09087 | 0.71193 | 3141.09087 | 0.39133 | 3141.09087 | 0.56729 |
| 3139.6618  | 0.33017 | 3139.6618  | 0.71345 | 3139.6618  | 0.39176 | 3139.6618  | 0.57063 |
| 3138.23274 | 0.33101 | 3138.23274 | 0.71468 | 3138.23274 | 0.39222 | 3138.23274 | 0.57401 |
| 3136.80367 | 0.33163 | 3136.80367 | 0.71559 | 3136.80367 | 0.39266 | 3136.80367 | 0.57739 |
| 3135.3746  | 0.33209 | 3135.3746  | 0.71646 | 3135.3746  | 0.39305 | 3135.3746  | 0.58077 |
| 3133.94553 | 0.33252 | 3133.94553 | 0.71768 | 3133.94553 | 0.39347 | 3133.94553 | 0.5841  |
| 3132.51647 | 0.33302 | 3132.51647 | 0.71936 | 3132.51647 | 0.39402 | 3132.51647 | 0.5874  |
| 3131.0874  | 0.33355 | 3131.0874  | 0.72108 | 3131.0874  | 0.39465 | 3131.0874  | 0.59078 |
| 3129.65833 | 0.334   | 3129.65833 | 0.72238 | 3129.65833 | 0.3952  | 3129.65833 | 0.59431 |
| 3128.22926 | 0.33429 | 3128.22926 | 0.72337 | 3128.22926 | 0.39557 | 3128.22926 | 0.59791 |
| 3126.8002  | 0.33449 | 3126.8002  | 0.72441 | 3126.8002  | 0.39577 | 3126.8002  | 0.60147 |
| 3125.37113 | 0.33468 | 3125.37113 | 0.72565 | 3125.37113 | 0.39588 | 3125.37113 | 0.60496 |
| 3123.94206 | 0.3349  | 3123.94206 | 0.72709 | 3123.94206 | 0.39596 | 3123.94206 | 0.60839 |
| 3122.51299 | 0.33518 | 3122.51299 | 0.72874 | 3122.51299 | 0.39612 | 3122.51299 | 0.6118  |
| 3121.08392 | 0.33545 | 3121.08392 | 0.73042 | 3121.08392 | 0.39641 | 3121.08392 | 0.61524 |
| 3119.65486 | 0.33569 | 3119.65486 | 0.73189 | 3119.65486 | 0.39678 | 3119.65486 | 0.61878 |
| 3118.22579 | 0.3359  | 3118.22579 | 0.73313 | 3118.22579 | 0.39715 | 3118.22579 | 0.62239 |
| 3116.79672 | 0.33609 | 3116.79672 | 0.73432 | 3116.79672 | 0.39751 | 3116.79672 | 0.62596 |
| 3115.36765 | 0.33627 | 3115.36765 | 0.73551 | 3115.36765 | 0.39794 | 3115.36765 | 0.62948 |
| 3113.93859 | 0.33643 | 3113.93859 | 0.73658 | 3113.93859 | 0.39848 | 3113.93859 | 0.63303 |
| 3112.50952 | 0.33655 | 3112.50952 | 0.73754 | 3112.50952 | 0.39905 | 3112.50952 | 0.63669 |
| 3111.08045 | 0.33668 | 3111.08045 | 0.73857 | 3111.08045 | 0.39962 | 3111.08045 | 0.64042 |
| 3109.65138 | 0.33683 | 3109.65138 | 0.73972 | 3109.65138 | 0.40015 | 3109.65138 | 0.64415 |
| 3108.22231 | 0.33697 | 3108.22231 | 0.74088 | 3108.22231 | 0.40068 | 3108.22231 | 0.64787 |
| 3106.79325 | 0.33706 | 3106.79325 | 0.74191 | 3106.79325 | 0.40124 | 3106.79325 | 0.65161 |
| 3105.36418 | 0.33712 | 3105.36418 | 0.74283 | 3105.36418 | 0.40181 | 3105.36418 | 0.65539 |
| 3103.93511 | 0.33718 | 3103.93511 | 0.74381 | 3103.93511 | 0.40236 | 3103.93511 | 0.65916 |
| 3102.50604 | 0.33723 | 3102.50604 | 0.7451  | 3102.50604 | 0.40292 | 3102.50604 | 0.66282 |
| 3101.07698 | 0.3373  | 3101.07698 | 0.7467  | 3101.07698 | 0.40362 | 3101.07698 | 0.66636 |
| 3099.64791 | 0.33734 | 3099.64791 | 0.74823 | 3099.64791 | 0.40442 | 3099.64791 | 0.66992 |
| 3098.21884 | 0.33726 | 3098.21884 | 0.74938 | 3098.21884 | 0.40519 | 3098.21884 | 0.67365 |
| 3096.78977 | 0.33707 | 3096.78977 | 0.75039 | 3096.78977 | 0.40588 | 3096.78977 | 0.6775  |
| 3095.36071 | 0.33684 | 3095.36071 | 0.75168 | 3095.36071 | 0.40653 | 3095.36071 | 0.68132 |
| 3093.93164 | 0.33665 | 3093.93164 | 0.75324 | 3093.93164 | 0.40718 | 3093.93164 | 0.68507 |
| 3092.50257 | 0.33649 | 3092.50257 | 0.75474 | 3092.50257 | 0.40783 | 3092.50257 | 0.68889 |
| 3091.0735  | 0.33631 | 3091.0735  | 0.756   | 3091.0735  | 0.40846 | 3091.0735  | 0.69281 |
| 3089.64443 | 0.33606 | 3089.64443 | 0.75714 | 3089.64443 | 0.40909 | 3089.64443 | 0.69674 |
| 3088.21537 | 0.33573 | 3088.21537 | 0.75836 | 3088.21537 | 0.40971 | 3088.21537 | 0.70059 |
| 3086.7863  | 0.33536 | 3086.7863  | 0.75974 | 3086.7863  | 0.41032 | 3086.7863  | 0.70434 |
| 3085.35723 | 0.33494 | 3085.35723 | 0.76118 | 3085.35723 | 0.41092 | 3085.35723 | 0.70806 |
| 3083.92816 | 0.33447 | 3083.92816 | 0.76256 | 3083.92816 | 0.41148 | 3083.92816 | 0.71178 |
| 3082.4991  | 0.33396 | 3082.4991  | 0.76392 | 3082.4991  | 0.41201 | 3082.4991  | 0.71549 |
| 3081.07003 | 0.33347 | 3081.07003 | 0.76544 | 3081.07003 | 0.41256 | 3081.07003 | 0.71917 |
| 3079.64096 | 0.33302 | 3079.64096 | 0.76714 | 3079.64096 | 0.41318 | 3079.64096 | 0.72283 |
| 3078.21189 | 0.33256 | 3078.21189 | 0.76879 | 3078.21189 | 0.41386 | 3078.21189 | 0.72653 |
| 3076.78282 | 0.33204 | 3076.78282 | 0.77014 | 3076.78282 | 0.41451 | 3076.78282 | 0.73031 |
| 3075.35376 | 0.33148 | 3075.35376 | 0.77121 | 3075.35376 | 0.41504 | 3075.35376 | 0.73416 |

|            |         |            |         |            |         |            |         |
|------------|---------|------------|---------|------------|---------|------------|---------|
| 3073.92469 | 0.33092 | 3073.92469 | 0.77223 | 3073.92469 | 0.41555 | 3073.92469 | 0.73804 |
| 3072.49562 | 0.33043 | 3072.49562 | 0.77339 | 3072.49562 | 0.41613 | 3072.49562 | 0.74193 |
| 3071.06655 | 0.33004 | 3071.06655 | 0.7747  | 3071.06655 | 0.41675 | 3071.06655 | 0.74581 |
| 3069.63749 | 0.32976 | 3069.63749 | 0.77607 | 3069.63749 | 0.41729 | 3069.63749 | 0.74965 |
| 3068.20842 | 0.32958 | 3068.20842 | 0.7775  | 3068.20842 | 0.41774 | 3068.20842 | 0.75339 |
| 3066.77935 | 0.32953 | 3066.77935 | 0.77908 | 3066.77935 | 0.41819 | 3066.77935 | 0.75697 |
| 3065.35028 | 0.32957 | 3065.35028 | 0.78085 | 3065.35028 | 0.41869 | 3065.35028 | 0.7605  |
| 3063.92122 | 0.32969 | 3063.92122 | 0.78262 | 3063.92122 | 0.41927 | 3063.92122 | 0.76412 |
| 3062.49215 | 0.32988 | 3062.49215 | 0.78416 | 3062.49215 | 0.42001 | 3062.49215 | 0.76791 |
| 3061.06308 | 0.33013 | 3061.06308 | 0.78546 | 3061.06308 | 0.42095 | 3061.06308 | 0.7718  |
| 3059.63401 | 0.33049 | 3059.63401 | 0.78673 | 3059.63401 | 0.42191 | 3059.63401 | 0.77563 |
| 3058.20494 | 0.33107 | 3058.20494 | 0.78825 | 3058.20494 | 0.42277 | 3058.20494 | 0.77931 |
| 3056.77588 | 0.3319  | 3056.77588 | 0.79008 | 3056.77588 | 0.42355 | 3056.77588 | 0.78285 |
| 3055.34681 | 0.33293 | 3055.34681 | 0.79203 | 3055.34681 | 0.4244  | 3055.34681 | 0.78636 |
| 3053.91774 | 0.33403 | 3053.91774 | 0.79376 | 3053.91774 | 0.4253  | 3053.91774 | 0.78999 |
| 3052.48867 | 0.33517 | 3052.48867 | 0.79512 | 3052.48867 | 0.4262  | 3052.48867 | 0.79376 |
| 3051.05961 | 0.33639 | 3051.05961 | 0.79629 | 3051.05961 | 0.42714 | 3051.05961 | 0.79752 |
| 3049.63054 | 0.33776 | 3049.63054 | 0.79763 | 3049.63054 | 0.42824 | 3049.63054 | 0.80113 |
| 3048.20147 | 0.33933 | 3048.20147 | 0.79926 | 3048.20147 | 0.42953 | 3048.20147 | 0.80462 |
| 3046.7724  | 0.34105 | 3046.7724  | 0.80104 | 3046.7724  | 0.43088 | 3046.7724  | 0.8081  |
| 3045.34333 | 0.34287 | 3045.34333 | 0.80277 | 3045.34333 | 0.43212 | 3045.34333 | 0.81163 |
| 3043.91427 | 0.34477 | 3043.91427 | 0.80437 | 3043.91427 | 0.43326 | 3043.91427 | 0.81517 |
| 3042.4852  | 0.34676 | 3042.4852  | 0.80586 | 3042.4852  | 0.43439 | 3042.4852  | 0.81866 |
| 3041.05613 | 0.34884 | 3041.05613 | 0.80725 | 3041.05613 | 0.43562 | 3041.05613 | 0.82212 |
| 3039.62706 | 0.35097 | 3039.62706 | 0.80855 | 3039.62706 | 0.43696 | 3039.62706 | 0.82555 |
| 3038.198   | 0.3531  | 3038.198   | 0.80987 | 3038.198   | 0.43833 | 3038.198   | 0.82896 |
| 3036.76893 | 0.35525 | 3036.76893 | 0.81133 | 3036.76893 | 0.43962 | 3036.76893 | 0.8323  |
| 3035.33986 | 0.35744 | 3035.33986 | 0.81285 | 3035.33986 | 0.44074 | 3035.33986 | 0.83553 |
| 3033.91079 | 0.35969 | 3033.91079 | 0.81434 | 3033.91079 | 0.44177 | 3033.91079 | 0.83864 |
| 3032.48172 | 0.36204 | 3032.48172 | 0.81588 | 3032.48172 | 0.4429  | 3032.48172 | 0.84162 |
| 3031.05266 | 0.36451 | 3031.05266 | 0.81756 | 3031.05266 | 0.44421 | 3031.05266 | 0.84456 |
| 3029.62359 | 0.36708 | 3029.62359 | 0.81917 | 3029.62359 | 0.44563 | 3029.62359 | 0.8476  |
| 3028.19452 | 0.36971 | 3028.19452 | 0.82048 | 3028.19452 | 0.44705 | 3028.19452 | 0.85078 |
| 3026.76545 | 0.37239 | 3026.76545 | 0.82163 | 3026.76545 | 0.44845 | 3026.76545 | 0.85396 |
| 3025.33639 | 0.37513 | 3025.33639 | 0.82292 | 3025.33639 | 0.44989 | 3025.33639 | 0.85696 |
| 3023.90732 | 0.37793 | 3023.90732 | 0.82437 | 3023.90732 | 0.45133 | 3023.90732 | 0.85976 |
| 3022.47825 | 0.38078 | 3022.47825 | 0.82584 | 3022.47825 | 0.45278 | 3022.47825 | 0.86248 |
| 3021.04918 | 0.3837  | 3021.04918 | 0.82726 | 3021.04918 | 0.45426 | 3021.04918 | 0.8652  |
| 3019.62012 | 0.38671 | 3019.62012 | 0.8287  | 3019.62012 | 0.45578 | 3019.62012 | 0.86791 |
| 3018.19105 | 0.38984 | 3018.19105 | 0.8302  | 3018.19105 | 0.45731 | 3018.19105 | 0.87051 |
| 3016.76198 | 0.39311 | 3016.76198 | 0.83177 | 3016.76198 | 0.45888 | 3016.76198 | 0.87291 |
| 3015.33291 | 0.39651 | 3015.33291 | 0.83334 | 3015.33291 | 0.46058 | 3015.33291 | 0.87514 |
| 3013.90384 | 0.40006 | 3013.90384 | 0.83479 | 3013.90384 | 0.46242 | 3013.90384 | 0.87727 |
| 3012.47478 | 0.40376 | 3012.47478 | 0.83608 | 3012.47478 | 0.46431 | 3012.47478 | 0.87932 |
| 3011.04571 | 0.40762 | 3011.04571 | 0.83723 | 3011.04571 | 0.46615 | 3011.04571 | 0.88128 |
| 3009.61664 | 0.41156 | 3009.61664 | 0.83814 | 3009.61664 | 0.46795 | 3009.61664 | 0.88322 |
| 3008.18757 | 0.41555 | 3008.18757 | 0.83876 | 3008.18757 | 0.46983 | 3008.18757 | 0.88518 |
| 3006.75851 | 0.41964 | 3006.75851 | 0.83927 | 3006.75851 | 0.47187 | 3006.75851 | 0.88707 |
| 3005.32944 | 0.42391 | 3005.32944 | 0.83994 | 3005.32944 | 0.4741  | 3005.32944 | 0.88875 |
| 3003.90037 | 0.42841 | 3003.90037 | 0.84085 | 3003.90037 | 0.47645 | 3003.90037 | 0.89019 |
| 3002.4713  | 0.43306 | 3002.4713  | 0.84182 | 3002.4713  | 0.47885 | 3002.4713  | 0.8915  |
| 3001.04223 | 0.43783 | 3001.04223 | 0.84267 | 3001.04223 | 0.4812  | 3001.04223 | 0.8928  |
| 2999.61317 | 0.44268 | 2999.61317 | 0.8434  | 2999.61317 | 0.48349 | 2999.61317 | 0.89409 |
| 2998.1841  | 0.44764 | 2998.1841  | 0.844   | 2998.1841  | 0.48582 | 2998.1841  | 0.89529 |

|            |         |            |         |            |         |            |         |
|------------|---------|------------|---------|------------|---------|------------|---------|
| 2996.75503 | 0.45272 | 2996.75503 | 0.84447 | 2996.75503 | 0.48825 | 2996.75503 | 0.89636 |
| 2995.32596 | 0.45793 | 2995.32596 | 0.84485 | 2995.32596 | 0.49079 | 2995.32596 | 0.8972  |
| 2993.8969  | 0.46327 | 2993.8969  | 0.84519 | 2993.8969  | 0.49341 | 2993.8969  | 0.89776 |
| 2992.46783 | 0.46869 | 2992.46783 | 0.8453  | 2992.46783 | 0.49604 | 2992.46783 | 0.89803 |
| 2991.03876 | 0.47411 | 2991.03876 | 0.84498 | 2991.03876 | 0.49862 | 2991.03876 | 0.89803 |
| 2989.60969 | 0.47957 | 2989.60969 | 0.84436 | 2989.60969 | 0.50113 | 2989.60969 | 0.89772 |
| 2988.18063 | 0.48511 | 2988.18063 | 0.84368 | 2988.18063 | 0.5036  | 2988.18063 | 0.89696 |
| 2986.75156 | 0.49075 | 2986.75156 | 0.84304 | 2986.75156 | 0.50603 | 2986.75156 | 0.89567 |
| 2985.32249 | 0.49645 | 2985.32249 | 0.84236 | 2985.32249 | 0.50839 | 2985.32249 | 0.89379 |
| 2983.89342 | 0.50216 | 2983.89342 | 0.84157 | 2983.89342 | 0.51069 | 2983.89342 | 0.89129 |
| 2982.46435 | 0.50786 | 2982.46435 | 0.84067 | 2982.46435 | 0.51301 | 2982.46435 | 0.88811 |
| 2981.03529 | 0.51356 | 2981.03529 | 0.83964 | 2981.03529 | 0.51541 | 2981.03529 | 0.88422 |
| 2979.60622 | 0.51925 | 2979.60622 | 0.83843 | 2979.60622 | 0.51792 | 2979.60622 | 0.87955 |
| 2978.17715 | 0.52494 | 2978.17715 | 0.837   | 2978.17715 | 0.52051 | 2978.17715 | 0.87399 |
| 2976.74808 | 0.53065 | 2976.74808 | 0.83537 | 2976.74808 | 0.52312 | 2976.74808 | 0.86743 |
| 2975.31902 | 0.53636 | 2975.31902 | 0.83358 | 2975.31902 | 0.52569 | 2975.31902 | 0.85976 |
| 2973.88995 | 0.54205 | 2973.88995 | 0.83159 | 2973.88995 | 0.5282  | 2973.88995 | 0.85088 |
| 2972.46088 | 0.5477  | 2972.46088 | 0.82939 | 2972.46088 | 0.53066 | 2972.46088 | 0.84074 |
| 2971.03181 | 0.55332 | 2971.03181 | 0.82701 | 2971.03181 | 0.53306 | 2971.03181 | 0.8293  |
| 2969.60274 | 0.55895 | 2969.60274 | 0.82458 | 2969.60274 | 0.53539 | 2969.60274 | 0.81652 |
| 2968.17368 | 0.56462 | 2968.17368 | 0.82226 | 2968.17368 | 0.53776 | 2968.17368 | 0.80232 |
| 2966.74461 | 0.57033 | 2966.74461 | 0.82014 | 2966.74461 | 0.54022 | 2966.74461 | 0.78671 |
| 2965.31554 | 0.57608 | 2965.31554 | 0.8182  | 2965.31554 | 0.54276 | 2965.31554 | 0.76979 |
| 2963.88647 | 0.58182 | 2963.88647 | 0.81632 | 2963.88647 | 0.54524 | 2963.88647 | 0.75174 |
| 2962.45741 | 0.58754 | 2962.45741 | 0.81442 | 2962.45741 | 0.54763 | 2962.45741 | 0.73276 |
| 2961.02834 | 0.59322 | 2961.02834 | 0.81246 | 2961.02834 | 0.54996 | 2961.02834 | 0.71307 |
| 2959.59927 | 0.59883 | 2959.59927 | 0.81045 | 2959.59927 | 0.55232 | 2959.59927 | 0.69298 |
| 2958.1702  | 0.60432 | 2958.1702  | 0.80843 | 2958.1702  | 0.55469 | 2958.1702  | 0.67281 |
| 2956.74114 | 0.60962 | 2956.74114 | 0.8064  | 2956.74114 | 0.55693 | 2956.74114 | 0.65292 |
| 2955.31207 | 0.61468 | 2955.31207 | 0.80432 | 2955.31207 | 0.55898 | 2955.31207 | 0.63366 |
| 2953.883   | 0.6195  | 2953.883   | 0.80209 | 2953.883   | 0.56085 | 2953.883   | 0.61539 |
| 2952.45393 | 0.6241  | 2952.45393 | 0.79963 | 2952.45393 | 0.56262 | 2952.45393 | 0.59845 |
| 2951.02486 | 0.62847 | 2951.02486 | 0.7969  | 2951.02486 | 0.5643  | 2951.02486 | 0.58315 |
| 2949.5958  | 0.63258 | 2949.5958  | 0.79404 | 2949.5958  | 0.56583 | 2949.5958  | 0.56974 |
| 2948.16673 | 0.6364  | 2948.16673 | 0.79115 | 2948.16673 | 0.56723 | 2948.16673 | 0.55842 |
| 2946.73766 | 0.63993 | 2946.73766 | 0.78822 | 2946.73766 | 0.56861 | 2946.73766 | 0.5493  |
| 2945.30859 | 0.64321 | 2945.30859 | 0.78518 | 2945.30859 | 0.57003 | 2945.30859 | 0.5424  |
| 2943.87953 | 0.64629 | 2943.87953 | 0.78202 | 2943.87953 | 0.5714  | 2943.87953 | 0.53765 |
| 2942.45046 | 0.64918 | 2942.45046 | 0.77878 | 2942.45046 | 0.57263 | 2942.45046 | 0.53486 |
| 2941.02139 | 0.65182 | 2941.02139 | 0.77559 | 2941.02139 | 0.57368 | 2941.02139 | 0.5338  |
| 2939.59232 | 0.65416 | 2939.59232 | 0.77252 | 2939.59232 | 0.57464 | 2939.59232 | 0.53424 |
| 2938.16325 | 0.65619 | 2938.16325 | 0.76961 | 2938.16325 | 0.57559 | 2938.16325 | 0.53592 |
| 2936.73419 | 0.65792 | 2936.73419 | 0.76682 | 2936.73419 | 0.57659 | 2936.73419 | 0.53856 |
| 2935.30512 | 0.65939 | 2935.30512 | 0.76415 | 2935.30512 | 0.5776  | 2935.30512 | 0.5419  |
| 2933.87605 | 0.66058 | 2933.87605 | 0.76163 | 2933.87605 | 0.57849 | 2933.87605 | 0.54564 |
| 2932.44698 | 0.66151 | 2932.44698 | 0.75929 | 2932.44698 | 0.57917 | 2932.44698 | 0.54949 |
| 2931.01792 | 0.66222 | 2931.01792 | 0.75707 | 2931.01792 | 0.57961 | 2931.01792 | 0.55321 |
| 2929.58885 | 0.66276 | 2929.58885 | 0.75489 | 2929.58885 | 0.57999 | 2929.58885 | 0.55658 |
| 2928.15978 | 0.6632  | 2928.15978 | 0.75276 | 2928.15978 | 0.5805  | 2928.15978 | 0.55943 |
| 2926.73071 | 0.66353 | 2926.73071 | 0.75084 | 2926.73071 | 0.58118 | 2926.73071 | 0.56162 |
| 2925.30165 | 0.6637  | 2925.30165 | 0.74926 | 2925.30165 | 0.58195 | 2925.30165 | 0.56302 |
| 2923.87258 | 0.66371 | 2923.87258 | 0.74806 | 2923.87258 | 0.58262 | 2923.87258 | 0.56352 |
| 2922.44351 | 0.66357 | 2922.44351 | 0.74722 | 2922.44351 | 0.58309 | 2922.44351 | 0.56313 |
| 2921.01444 | 0.66326 | 2921.01444 | 0.74677 | 2921.01444 | 0.58327 | 2921.01444 | 0.56193 |

|            |         |            |         |            |         |            |         |
|------------|---------|------------|---------|------------|---------|------------|---------|
| 2919.58537 | 0.66276 | 2919.58537 | 0.7467  | 2919.58537 | 0.5833  | 2919.58537 | 0.56006 |
| 2918.15631 | 0.66206 | 2918.15631 | 0.74695 | 2918.15631 | 0.58337 | 2918.15631 | 0.55769 |
| 2916.72724 | 0.66114 | 2916.72724 | 0.74738 | 2916.72724 | 0.58362 | 2916.72724 | 0.55501 |
| 2915.29817 | 0.66001 | 2915.29817 | 0.74788 | 2915.29817 | 0.58391 | 2915.29817 | 0.55225 |
| 2913.8691  | 0.65866 | 2913.8691  | 0.7483  | 2913.8691  | 0.58409 | 2913.8691  | 0.54965 |
| 2912.44004 | 0.65715 | 2912.44004 | 0.74856 | 2912.44004 | 0.58407 | 2912.44004 | 0.54744 |
| 2911.01097 | 0.6555  | 2911.01097 | 0.7486  | 2911.01097 | 0.58393 | 2911.01097 | 0.54585 |
| 2909.5819  | 0.65375 | 2909.5819  | 0.74843 | 2909.5819  | 0.58369 | 2909.5819  | 0.54512 |
| 2908.15283 | 0.65193 | 2908.15283 | 0.74809 | 2908.15283 | 0.58338 | 2908.15283 | 0.54547 |
| 2906.72376 | 0.65005 | 2906.72376 | 0.74764 | 2906.72376 | 0.58299 | 2906.72376 | 0.54707 |
| 2905.2947  | 0.64817 | 2905.2947  | 0.74708 | 2905.2947  | 0.58261 | 2905.2947  | 0.55006 |
| 2903.86563 | 0.64636 | 2903.86563 | 0.74641 | 2903.86563 | 0.58229 | 2903.86563 | 0.55455 |
| 2902.43656 | 0.6447  | 2902.43656 | 0.74562 | 2902.43656 | 0.58207 | 2902.43656 | 0.56054 |
| 2901.00749 | 0.64327 | 2901.00749 | 0.74475 | 2901.00749 | 0.58195 | 2901.00749 | 0.56798 |
| 2899.57843 | 0.64211 | 2899.57843 | 0.74386 | 2899.57843 | 0.58187 | 2899.57843 | 0.57675 |
| 2898.14936 | 0.64127 | 2898.14936 | 0.74297 | 2898.14936 | 0.58179 | 2898.14936 | 0.58667 |
| 2896.72029 | 0.64071 | 2896.72029 | 0.74207 | 2896.72029 | 0.58173 | 2896.72029 | 0.59753 |
| 2895.29122 | 0.64044 | 2895.29122 | 0.74109 | 2895.29122 | 0.58181 | 2895.29122 | 0.60907 |
| 2893.86216 | 0.64044 | 2893.86216 | 0.74003 | 2893.86216 | 0.5821  | 2893.86216 | 0.62097 |
| 2892.43309 | 0.6407  | 2892.43309 | 0.73894 | 2892.43309 | 0.58257 | 2892.43309 | 0.6329  |
| 2891.00402 | 0.64119 | 2891.00402 | 0.73786 | 2891.00402 | 0.58311 | 2891.00402 | 0.64449 |
| 2889.57495 | 0.64187 | 2889.57495 | 0.73679 | 2889.57495 | 0.58363 | 2889.57495 | 0.65545 |
| 2888.14588 | 0.6427  | 2888.14588 | 0.73574 | 2888.14588 | 0.58414 | 2888.14588 | 0.66563 |
| 2886.71682 | 0.64369 | 2886.71682 | 0.73472 | 2886.71682 | 0.58473 | 2886.71682 | 0.67491 |
| 2885.28775 | 0.64482 | 2885.28775 | 0.73378 | 2885.28775 | 0.58545 | 2885.28775 | 0.68323 |
| 2883.85868 | 0.64606 | 2883.85868 | 0.73292 | 2883.85868 | 0.58629 | 2883.85868 | 0.69056 |
| 2882.42961 | 0.64736 | 2882.42961 | 0.73214 | 2882.42961 | 0.58717 | 2882.42961 | 0.69694 |
| 2881.00055 | 0.64875 | 2881.00055 | 0.7315  | 2881.00055 | 0.58801 | 2881.00055 | 0.70251 |
| 2879.57148 | 0.65024 | 2879.57148 | 0.73102 | 2879.57148 | 0.58882 | 2879.57148 | 0.70737 |
| 2878.14241 | 0.65183 | 2878.14241 | 0.7308  | 2878.14241 | 0.58963 | 2878.14241 | 0.7116  |
| 2876.71334 | 0.65353 | 2876.71334 | 0.7309  | 2876.71334 | 0.59047 | 2876.71334 | 0.71529 |
| 2875.28427 | 0.65531 | 2875.28427 | 0.73129 | 2875.28427 | 0.59141 | 2875.28427 | 0.71851 |
| 2873.85521 | 0.6572  | 2873.85521 | 0.73185 | 2873.85521 | 0.59253 | 2873.85521 | 0.72136 |
| 2872.42614 | 0.65921 | 2872.42614 | 0.73252 | 2872.42614 | 0.59384 | 2872.42614 | 0.72389 |
| 2870.99707 | 0.66134 | 2870.99707 | 0.73331 | 2870.99707 | 0.59526 | 2870.99707 | 0.72619 |
| 2869.568   | 0.66356 | 2869.568   | 0.73434 | 2869.568   | 0.59665 | 2869.568   | 0.72828 |
| 2868.13894 | 0.66583 | 2868.13894 | 0.73563 | 2868.13894 | 0.59794 | 2868.13894 | 0.7302  |
| 2866.70987 | 0.66809 | 2866.70987 | 0.73715 | 2866.70987 | 0.59915 | 2866.70987 | 0.73199 |
| 2865.2808  | 0.67035 | 2865.2808  | 0.73886 | 2865.2808  | 0.60037 | 2865.2808  | 0.7337  |
| 2863.85173 | 0.67256 | 2863.85173 | 0.74076 | 2863.85173 | 0.60167 | 2863.85173 | 0.73533 |
| 2862.42266 | 0.6747  | 2862.42266 | 0.74286 | 2862.42266 | 0.60305 | 2862.42266 | 0.73685 |
| 2860.9936  | 0.67676 | 2860.9936  | 0.74515 | 2860.9936  | 0.60448 | 2860.9936  | 0.73827 |
| 2859.56453 | 0.67877 | 2859.56453 | 0.74757 | 2859.56453 | 0.6059  | 2859.56453 | 0.73966 |
| 2858.13546 | 0.68079 | 2858.13546 | 0.75011 | 2858.13546 | 0.60733 | 2858.13546 | 0.74112 |
| 2856.70639 | 0.68286 | 2856.70639 | 0.75284 | 2856.70639 | 0.60879 | 2856.70639 | 0.7427  |
| 2855.27733 | 0.685   | 2855.27733 | 0.75582 | 2855.27733 | 0.61031 | 2855.27733 | 0.7444  |
| 2853.84826 | 0.68726 | 2853.84826 | 0.75907 | 2853.84826 | 0.61187 | 2853.84826 | 0.74626 |
| 2852.41919 | 0.68965 | 2852.41919 | 0.76259 | 2852.41919 | 0.61347 | 2852.41919 | 0.74829 |
| 2850.99012 | 0.69217 | 2850.99012 | 0.76639 | 2850.99012 | 0.61513 | 2850.99012 | 0.75053 |
| 2849.56106 | 0.69478 | 2849.56106 | 0.77044 | 2849.56106 | 0.6169  | 2849.56106 | 0.75298 |
| 2848.13199 | 0.69746 | 2848.13199 | 0.77464 | 2848.13199 | 0.61873 | 2848.13199 | 0.75568 |
| 2846.70292 | 0.70022 | 2846.70292 | 0.77883 | 2846.70292 | 0.62065 | 2846.70292 | 0.75863 |
| 2845.27385 | 0.70303 | 2845.27385 | 0.7829  | 2845.27385 | 0.62268 | 2845.27385 | 0.76177 |
| 2843.84478 | 0.70585 | 2843.84478 | 0.78684 | 2843.84478 | 0.62483 | 2843.84478 | 0.76504 |

|            |         |            |         |            |         |            |         |
|------------|---------|------------|---------|------------|---------|------------|---------|
| 2842.41572 | 0.70862 | 2842.41572 | 0.79065 | 2842.41572 | 0.62699 | 2842.41572 | 0.76836 |
| 2840.98665 | 0.71142 | 2840.98665 | 0.79433 | 2840.98665 | 0.62907 | 2840.98665 | 0.77173 |
| 2839.55758 | 0.71435 | 2839.55758 | 0.79782 | 2839.55758 | 0.6311  | 2839.55758 | 0.77516 |
| 2838.12851 | 0.71747 | 2838.12851 | 0.80107 | 2838.12851 | 0.63314 | 2838.12851 | 0.77867 |
| 2836.69945 | 0.72083 | 2836.69945 | 0.80409 | 2836.69945 | 0.63525 | 2836.69945 | 0.78225 |
| 2835.27038 | 0.72446 | 2835.27038 | 0.80698 | 2835.27038 | 0.63747 | 2835.27038 | 0.78589 |
| 2833.84131 | 0.72837 | 2833.84131 | 0.80978 | 2833.84131 | 0.63979 | 2833.84131 | 0.78953 |
| 2832.41224 | 0.73254 | 2832.41224 | 0.81249 | 2832.41224 | 0.64221 | 2832.41224 | 0.79312 |
| 2830.98317 | 0.73694 | 2830.98317 | 0.81511 | 2830.98317 | 0.64472 | 2830.98317 | 0.79666 |
| 2829.55411 | 0.74157 | 2829.55411 | 0.81764 | 2829.55411 | 0.64735 | 2829.55411 | 0.80015 |
| 2828.12504 | 0.74642 | 2828.12504 | 0.8201  | 2828.12504 | 0.65009 | 2828.12504 | 0.80364 |
| 2826.69597 | 0.75148 | 2826.69597 | 0.82247 | 2826.69597 | 0.65291 | 2826.69597 | 0.80717 |
| 2825.2669  | 0.75672 | 2825.2669  | 0.82477 | 2825.2669  | 0.6558  | 2825.2669  | 0.81074 |
| 2823.83784 | 0.7621  | 2823.83784 | 0.82698 | 2823.83784 | 0.65884 | 2823.83784 | 0.81436 |
| 2822.40877 | 0.76762 | 2822.40877 | 0.82911 | 2822.40877 | 0.66201 | 2822.40877 | 0.81806 |
| 2820.9797  | 0.77331 | 2820.9797  | 0.83117 | 2820.9797  | 0.66523 | 2820.9797  | 0.82191 |
| 2819.55063 | 0.77913 | 2819.55063 | 0.83317 | 2819.55063 | 0.66842 | 2819.55063 | 0.82596 |
| 2818.12157 | 0.78501 | 2818.12157 | 0.83511 | 2818.12157 | 0.67157 | 2818.12157 | 0.83019 |
| 2816.6925  | 0.7909  | 2816.6925  | 0.83699 | 2816.6925  | 0.67472 | 2816.6925  | 0.83455 |
| 2815.26343 | 0.79679 | 2815.26343 | 0.83883 | 2815.26343 | 0.67788 | 2815.26343 | 0.83902 |
| 2813.83436 | 0.80266 | 2813.83436 | 0.84068 | 2813.83436 | 0.68105 | 2813.83436 | 0.84365 |
| 2812.40529 | 0.80851 | 2812.40529 | 0.84255 | 2812.40529 | 0.68429 | 2812.40529 | 0.84845 |
| 2810.97623 | 0.81432 | 2810.97623 | 0.84441 | 2810.97623 | 0.68759 | 2810.97623 | 0.85336 |
| 2809.54716 | 0.82013 | 2809.54716 | 0.84622 | 2809.54716 | 0.69092 | 2809.54716 | 0.85828 |
| 2808.11809 | 0.82595 | 2808.11809 | 0.84794 | 2808.11809 | 0.69422 | 2808.11809 | 0.86314 |
| 2806.68902 | 0.83175 | 2806.68902 | 0.84963 | 2806.68902 | 0.69752 | 2806.68902 | 0.86789 |
| 2805.25996 | 0.83751 | 2805.25996 | 0.85131 | 2805.25996 | 0.70085 | 2805.25996 | 0.87251 |
| 2803.83089 | 0.84319 | 2803.83089 | 0.85298 | 2803.83089 | 0.70412 | 2803.83089 | 0.87698 |
| 2802.40182 | 0.84877 | 2802.40182 | 0.85465 | 2802.40182 | 0.70728 | 2802.40182 | 0.88123 |
| 2800.97275 | 0.85424 | 2800.97275 | 0.85632 | 2800.97275 | 0.71038 | 2800.97275 | 0.88521 |
| 2799.54368 | 0.85964 | 2799.54368 | 0.85795 | 2799.54368 | 0.71353 | 2799.54368 | 0.88893 |
| 2798.11462 | 0.86504 | 2798.11462 | 0.85947 | 2798.11462 | 0.71677 | 2798.11462 | 0.89246 |
| 2796.68555 | 0.87042 | 2796.68555 | 0.86085 | 2796.68555 | 0.71999 | 2796.68555 | 0.89581 |
| 2795.25648 | 0.87571 | 2795.25648 | 0.86213 | 2795.25648 | 0.72312 | 2795.25648 | 0.89893 |
| 2793.82741 | 0.88086 | 2793.82741 | 0.86339 | 2793.82741 | 0.7262  | 2793.82741 | 0.9018  |
| 2792.39835 | 0.88583 | 2792.39835 | 0.86467 | 2792.39835 | 0.72925 | 2792.39835 | 0.90442 |
| 2790.96928 | 0.8907  | 2790.96928 | 0.86596 | 2790.96928 | 0.73229 | 2790.96928 | 0.90683 |
| 2789.54021 | 0.89549 | 2789.54021 | 0.86721 | 2789.54021 | 0.73534 | 2789.54021 | 0.90906 |
| 2788.11114 | 0.90022 | 2788.11114 | 0.86838 | 2788.11114 | 0.73839 | 2788.11114 | 0.91116 |
| 2786.68208 | 0.90487 | 2786.68208 | 0.86947 | 2786.68208 | 0.74143 | 2786.68208 | 0.91312 |
| 2785.25301 | 0.90938 | 2785.25301 | 0.87053 | 2785.25301 | 0.74441 | 2785.25301 | 0.91493 |
| 2783.82394 | 0.91374 | 2783.82394 | 0.87158 | 2783.82394 | 0.74738 | 2783.82394 | 0.91656 |
| 2782.39487 | 0.91795 | 2782.39487 | 0.87262 | 2782.39487 | 0.75038 | 2782.39487 | 0.91805 |
| 2780.9658  | 0.92204 | 2780.9658  | 0.8736  | 2780.9658  | 0.75338 | 2780.9658  | 0.91938 |
| 2779.53674 | 0.926   | 2779.53674 | 0.87454 | 2779.53674 | 0.75633 | 2779.53674 | 0.92057 |
| 2778.10767 | 0.92983 | 2778.10767 | 0.87544 | 2778.10767 | 0.75926 | 2778.10767 | 0.92161 |
| 2776.6786  | 0.93351 | 2776.6786  | 0.87631 | 2776.6786  | 0.76221 | 2776.6786  | 0.92256 |
| 2775.24953 | 0.93709 | 2775.24953 | 0.87711 | 2775.24953 | 0.76516 | 2775.24953 | 0.92346 |
| 2773.82047 | 0.94061 | 2773.82047 | 0.87783 | 2773.82047 | 0.7681  | 2773.82047 | 0.92431 |
| 2772.3914  | 0.9441  | 2772.3914  | 0.87851 | 2772.3914  | 0.77099 | 2772.3914  | 0.92512 |
| 2770.96233 | 0.94751 | 2770.96233 | 0.8792  | 2770.96233 | 0.7738  | 2770.96233 | 0.92585 |
| 2769.53326 | 0.9508  | 2769.53326 | 0.87992 | 2769.53326 | 0.77653 | 2769.53326 | 0.92648 |
| 2768.10419 | 0.95394 | 2768.10419 | 0.88066 | 2768.10419 | 0.77925 | 2768.10419 | 0.92704 |
| 2766.67513 | 0.95694 | 2766.67513 | 0.88141 | 2766.67513 | 0.782   | 2766.67513 | 0.92753 |



|            |         |            |         |            |         |            |         |
|------------|---------|------------|---------|------------|---------|------------|---------|
| 2765.24606 | 0.95982 | 2765.24606 | 0.88219 | 2765.24606 | 0.78477 | 2765.24606 | 0.92799 |
| 2763.81699 | 0.96259 | 2763.81699 | 0.88297 | 2763.81699 | 0.78752 | 2763.81699 | 0.92845 |
| 2762.38792 | 0.96526 | 2762.38792 | 0.88376 | 2762.38792 | 0.79023 | 2762.38792 | 0.92887 |
| 2760.95886 | 0.96783 | 2760.95886 | 0.88452 | 2760.95886 | 0.79289 | 2760.95886 | 0.92924 |
| 2759.52979 | 0.97028 | 2759.52979 | 0.88525 | 2759.52979 | 0.79551 | 2759.52979 | 0.92958 |
| 2758.10072 | 0.97261 | 2758.10072 | 0.88592 | 2758.10072 | 0.79814 | 2758.10072 | 0.92992 |
| 2756.67165 | 0.97483 | 2756.67165 | 0.88655 | 2756.67165 | 0.80076 | 2756.67165 | 0.93029 |
| 2755.24259 | 0.97695 | 2755.24259 | 0.88714 | 2755.24259 | 0.80334 | 2755.24259 | 0.93068 |
| 2753.81352 | 0.97899 | 2753.81352 | 0.88771 | 2753.81352 | 0.80586 | 2753.81352 | 0.93108 |
| 2752.38445 | 0.98089 | 2752.38445 | 0.88825 | 2752.38445 | 0.80835 | 2752.38445 | 0.93148 |
| 2750.95538 | 0.98266 | 2750.95538 | 0.88878 | 2750.95538 | 0.81082 | 2750.95538 | 0.9319  |
| 2749.52631 | 0.98432 | 2749.52631 | 0.88927 | 2749.52631 | 0.81326 | 2749.52631 | 0.93237 |
| 2748.09725 | 0.9859  | 2748.09725 | 0.88975 | 2748.09725 | 0.81565 | 2748.09725 | 0.9329  |
| 2746.66818 | 0.98743 | 2746.66818 | 0.8902  | 2746.66818 | 0.81796 | 2746.66818 | 0.9335  |
| 2745.23911 | 0.98889 | 2745.23911 | 0.89064 | 2745.23911 | 0.82017 | 2745.23911 | 0.93416 |
| 2743.81004 | 0.9902  | 2743.81004 | 0.89108 | 2743.81004 | 0.82231 | 2743.81004 | 0.93485 |
| 2742.38098 | 0.99135 | 2742.38098 | 0.89153 | 2742.38098 | 0.82442 | 2742.38098 | 0.93559 |
| 2740.95191 | 0.99236 | 2740.95191 | 0.89201 | 2740.95191 | 0.82651 | 2740.95191 | 0.93639 |
| 2739.52284 | 0.9933  | 2739.52284 | 0.89251 | 2739.52284 | 0.8286  | 2739.52284 | 0.93723 |
| 2738.09377 | 0.99417 | 2738.09377 | 0.89298 | 2738.09377 | 0.8307  | 2738.09377 | 0.9381  |
| 2736.6647  | 0.99497 | 2736.6647  | 0.89341 | 2736.6647  | 0.83275 | 2736.6647  | 0.93898 |
| 2735.23564 | 0.99572 | 2735.23564 | 0.89379 | 2735.23564 | 0.83471 | 2735.23564 | 0.93991 |
| 2733.80657 | 0.99642 | 2733.80657 | 0.89415 | 2733.80657 | 0.83663 | 2733.80657 | 0.94089 |
| 2732.3775  | 0.99707 | 2732.3775  | 0.89453 | 2732.3775  | 0.83856 | 2732.3775  | 0.9419  |
| 2730.94843 | 0.99763 | 2730.94843 | 0.89494 | 2730.94843 | 0.84049 | 2730.94843 | 0.94292 |
| 2729.51937 | 0.99811 | 2729.51937 | 0.89543 | 2729.51937 | 0.84234 | 2729.51937 | 0.94392 |
| 2728.0903  | 0.99852 | 2728.0903  | 0.89598 | 2728.0903  | 0.84411 | 2728.0903  | 0.94487 |
| 2726.66123 | 0.99888 | 2726.66123 | 0.89659 | 2726.66123 | 0.84588 | 2726.66123 | 0.94578 |
| 2725.23216 | 0.99917 | 2725.23216 | 0.8972  | 2725.23216 | 0.84773 | 2725.23216 | 0.94667 |
| 2723.8031  | 0.9994  | 2723.8031  | 0.89783 | 2723.8031  | 0.84964 | 2723.8031  | 0.94754 |
| 2722.37403 | 0.99958 | 2722.37403 | 0.89849 | 2722.37403 | 0.85152 | 2722.37403 | 0.94834 |
| 2720.94496 | 0.99973 | 2720.94496 | 0.89919 | 2720.94496 | 0.8533  | 2720.94496 | 0.94908 |
| 2719.51589 | 0.99988 | 2719.51589 | 0.8999  | 2719.51589 | 0.85497 | 2719.51589 | 0.94975 |
| 2718.08682 | 1       | 2718.08682 | 0.90061 | 2718.08682 | 0.8566  | 2718.08682 | 0.95034 |
| 2716.65776 | 1.00022 | 2716.65776 | 0.9013  | 2716.65776 | 0.85825 | 2716.65776 | 0.95086 |
| 2715.22869 | 1.0004  | 2715.22869 | 0.90197 | 2715.22869 | 0.85996 | 2715.22869 | 0.95134 |
| 2713.79962 | 1.00054 | 2713.79962 | 0.90262 | 2713.79962 | 0.86166 | 2713.79962 | 0.95179 |
| 2712.37055 | 1.00064 | 2712.37055 | 0.90327 | 2712.37055 | 0.8633  | 2712.37055 | 0.95221 |
| 2710.94149 | 1.00068 | 2710.94149 | 0.90392 | 2710.94149 | 0.86486 | 2710.94149 | 0.95255 |
| 2709.51242 | 1.00067 | 2709.51242 | 0.90455 | 2709.51242 | 0.86646 | 2709.51242 | 0.9528  |
| 2708.08335 | 1.00062 | 2708.08335 | 0.90519 | 2708.08335 | 0.8682  | 2708.08335 | 0.95297 |
| 2706.65428 | 1.00054 | 2706.65428 | 0.90589 | 2706.65428 | 0.8701  | 2706.65428 | 0.9531  |
| 2705.22521 | 1.00041 | 2705.22521 | 0.90665 | 2705.22521 | 0.87203 | 2705.22521 | 0.9532  |
| 2703.79615 | 1.00022 | 2703.79615 | 0.90748 | 2703.79615 | 0.87388 | 2703.79615 | 0.95327 |
| 2702.36708 | 1.00011 | 2702.36708 | 0.90837 | 2702.36708 | 0.87552 | 2702.36708 | 0.95331 |
| 2700.93801 | 0.99996 | 2700.93801 | 0.90928 | 2700.93801 | 0.87692 | 2700.93801 | 0.95335 |
| 2699.50894 | 0.99978 | 2699.50894 | 0.91021 | 2699.50894 | 0.87819 | 2699.50894 | 0.95339 |
| 2698.07988 | 0.99971 | 2698.07988 | 0.91112 | 2698.07988 | 0.87953 | 2698.07988 | 0.95343 |
| 2696.65081 | 0.99962 | 2696.65081 | 0.91201 | 2696.65081 | 0.88106 | 2696.65081 | 0.95348 |
| 2695.22174 | 0.9995  | 2695.22174 | 0.91286 | 2695.22174 | 0.88272 | 2695.22174 | 0.95353 |
| 2693.79267 | 0.99945 | 2693.79267 | 0.91369 | 2693.79267 | 0.8844  | 2693.79267 | 0.95354 |
| 2692.36361 | 0.99933 | 2692.36361 | 0.91449 | 2692.36361 | 0.88606 | 2692.36361 | 0.95352 |
| 2690.93454 | 0.99927 | 2690.93454 | 0.91529 | 2690.93454 | 0.88769 | 2690.93454 | 0.95349 |
| 2689.50547 | 0.99917 | 2689.50547 | 0.9161  | 2689.50547 | 0.88929 | 2689.50547 | 0.95352 |

|            |         |            |         |            |         |            |         |
|------------|---------|------------|---------|------------|---------|------------|---------|
| 2688.0764  | 0.99906 | 2688.0764  | 0.91695 | 2688.0764  | 0.89085 | 2688.0764  | 0.95358 |
| 2686.64733 | 0.99894 | 2686.64733 | 0.91786 | 2686.64733 | 0.89238 | 2686.64733 | 0.95365 |
| 2685.21827 | 0.99892 | 2685.21827 | 0.91882 | 2685.21827 | 0.89391 | 2685.21827 | 0.95371 |
| 2683.7892  | 0.99884 | 2683.7892  | 0.91985 | 2683.7892  | 0.89541 | 2683.7892  | 0.95381 |
| 2682.36013 | 0.99883 | 2682.36013 | 0.92093 | 2682.36013 | 0.89685 | 2682.36013 | 0.95394 |
| 2680.93106 | 0.9988  | 2680.93106 | 0.92205 | 2680.93106 | 0.89826 | 2680.93106 | 0.95411 |
| 2679.502   | 0.99875 | 2679.502   | 0.92319 | 2679.502   | 0.89971 | 2679.502   | 0.95432 |
| 2678.07293 | 0.99869 | 2678.07293 | 0.92432 | 2678.07293 | 0.90124 | 2678.07293 | 0.95458 |
| 2676.64386 | 0.99861 | 2676.64386 | 0.92542 | 2676.64386 | 0.9028  | 2676.64386 | 0.9549  |
| 2675.21479 | 0.9985  | 2675.21479 | 0.92649 | 2675.21479 | 0.90438 | 2675.21479 | 0.95523 |
| 2673.78572 | 0.99836 | 2673.78572 | 0.92753 | 2673.78572 | 0.90595 | 2673.78572 | 0.95556 |
| 2672.35666 | 0.99818 | 2672.35666 | 0.92851 | 2672.35666 | 0.90751 | 2672.35666 | 0.95591 |
| 2670.92759 | 0.99796 | 2670.92759 | 0.92943 | 2670.92759 | 0.90904 | 2670.92759 | 0.95628 |
| 2669.49852 | 0.99769 | 2669.49852 | 0.93032 | 2669.49852 | 0.91051 | 2669.49852 | 0.95669 |
| 2668.06945 | 0.99739 | 2668.06945 | 0.93117 | 2668.06945 | 0.91193 | 2668.06945 | 0.95712 |
| 2666.64039 | 0.99706 | 2666.64039 | 0.93202 | 2666.64039 | 0.91331 | 2666.64039 | 0.95759 |
| 2665.21132 | 0.99698 | 2665.21132 | 0.9329  | 2665.21132 | 0.91473 | 2665.21132 | 0.95809 |
| 2663.78225 | 0.99687 | 2663.78225 | 0.93382 | 2663.78225 | 0.91623 | 2663.78225 | 0.95858 |
| 2662.35318 | 0.99672 | 2662.35318 | 0.93479 | 2662.35318 | 0.9178  | 2662.35318 | 0.95907 |
| 2660.92411 | 0.99706 | 2660.92411 | 0.93581 | 2660.92411 | 0.9193  | 2660.92411 | 0.95959 |
| 2659.49505 | 0.99741 | 2659.49505 | 0.93688 | 2659.49505 | 0.92068 | 2659.49505 | 0.96016 |
| 2658.06598 | 0.99776 | 2658.06598 | 0.93798 | 2658.06598 | 0.92196 | 2658.06598 | 0.96078 |
| 2656.63691 | 0.9981  | 2656.63691 | 0.93904 | 2656.63691 | 0.92323 | 2656.63691 | 0.96144 |
| 2655.20784 | 0.99839 | 2655.20784 | 0.94005 | 2655.20784 | 0.92457 | 2655.20784 | 0.96212 |
| 2653.77878 | 0.99866 | 2653.77878 | 0.94102 | 2653.77878 | 0.926   | 2653.77878 | 0.96282 |
| 2652.34971 | 0.99892 | 2652.34971 | 0.94195 | 2652.34971 | 0.92746 | 2652.34971 | 0.96353 |
| 2650.92064 | 0.99919 | 2650.92064 | 0.94285 | 2650.92064 | 0.92889 | 2650.92064 | 0.96426 |
| 2649.49157 | 0.99945 | 2649.49157 | 0.9437  | 2649.49157 | 0.93029 | 2649.49157 | 0.96503 |
| 2648.06251 | 0.99972 | 2648.06251 | 0.94449 | 2648.06251 | 0.93172 | 2648.06251 | 0.96583 |
| 2646.63344 | 1       | 2646.63344 | 0.94525 | 2646.63344 | 0.93314 | 2646.63344 | 0.96665 |
| 2645.20437 | 1.00027 | 2645.20437 | 0.94601 | 2645.20437 | 0.93452 | 2645.20437 | 0.96749 |
| 2643.7753  | 1.00051 | 2643.7753  | 0.94682 | 2643.7753  | 0.93588 | 2643.7753  | 0.96832 |
| 2642.34623 | 1.00067 | 2642.34623 | 0.94768 | 2642.34623 | 0.93723 | 2642.34623 | 0.96914 |
| 2640.91717 | 1.00076 | 2640.91717 | 0.94858 | 2640.91717 | 0.9385  | 2640.91717 | 0.96996 |
| 2639.4881  | 1.0008  | 2639.4881  | 0.9495  | 2639.4881  | 0.93967 | 2639.4881  | 0.97079 |
| 2638.05903 | 1.00083 | 2638.05903 | 0.95044 | 2638.05903 | 0.9408  | 2638.05903 | 0.97163 |
| 2636.62996 | 1.00084 | 2636.62996 | 0.95137 | 2636.62996 | 0.94202 | 2636.62996 | 0.97251 |
| 2635.2009  | 1.00084 | 2635.2009  | 0.95226 | 2635.2009  | 0.94339 | 2635.2009  | 0.97345 |
| 2633.77183 | 1.0008  | 2633.77183 | 0.95312 | 2633.77183 | 0.94483 | 2633.77183 | 0.97443 |
| 2632.34276 | 1.00073 | 2632.34276 | 0.95392 | 2632.34276 | 0.94625 | 2632.34276 | 0.97543 |
| 2630.91369 | 1.00062 | 2630.91369 | 0.95463 | 2630.91369 | 0.94757 | 2630.91369 | 0.9764  |
| 2629.48462 | 1.00064 | 2629.48462 | 0.95525 | 2629.48462 | 0.94872 | 2629.48462 | 0.97736 |
| 2628.05556 | 1.00063 | 2628.05556 | 0.9558  | 2628.05556 | 0.94975 | 2628.05556 | 0.97831 |
| 2626.62649 | 1.0006  | 2626.62649 | 0.95629 | 2626.62649 | 0.95073 | 2626.62649 | 0.97927 |
| 2625.19742 | 1.00053 | 2625.19742 | 0.95674 | 2625.19742 | 0.95169 | 2625.19742 | 0.98023 |
| 2623.76835 | 1.00045 | 2623.76835 | 0.95721 | 2623.76835 | 0.95262 | 2623.76835 | 0.98123 |
| 2622.33929 | 1.00032 | 2622.33929 | 0.9577  | 2622.33929 | 0.95351 | 2622.33929 | 0.98224 |
| 2620.91022 | 1.0003  | 2620.91022 | 0.95825 | 2620.91022 | 0.95436 | 2620.91022 | 0.98324 |
| 2619.48115 | 1.00023 | 2619.48115 | 0.95884 | 2619.48115 | 0.9552  | 2619.48115 | 0.98421 |
| 2618.05208 | 1.00026 | 2618.05208 | 0.95944 | 2618.05208 | 0.95602 | 2618.05208 | 0.98517 |
| 2616.62302 | 1.00024 | 2616.62302 | 0.96004 | 2616.62302 | 0.95679 | 2616.62302 | 0.98613 |
| 2615.19395 | 1.00018 | 2615.19395 | 0.96062 | 2615.19395 | 0.95754 | 2615.19395 | 0.98709 |
| 2613.76488 | 1.00011 | 2613.76488 | 0.96116 | 2613.76488 | 0.95831 | 2613.76488 | 0.98801 |
| 2612.33581 | 1.00003 | 2612.33581 | 0.96167 | 2612.33581 | 0.95907 | 2612.33581 | 0.9889  |

|            |         |            |         |            |         |            |         |
|------------|---------|------------|---------|------------|---------|------------|---------|
| 2610.90674 | 0.99993 | 2610.90674 | 0.9621  | 2610.90674 | 0.95979 | 2610.90674 | 0.98979 |
| 2609.47768 | 0.99995 | 2609.47768 | 0.96246 | 2609.47768 | 0.96049 | 2609.47768 | 0.9907  |
| 2608.04861 | 0.99993 | 2608.04861 | 0.96274 | 2608.04861 | 0.96117 | 2608.04861 | 0.99161 |
| 2606.61954 | 0.99987 | 2606.61954 | 0.96299 | 2606.61954 | 0.96183 | 2606.61954 | 0.99248 |
| 2605.19047 | 1.00016 | 2605.19047 | 0.96324 | 2605.19047 | 0.96243 | 2605.19047 | 0.99329 |
| 2603.76141 | 1.00042 | 2603.76141 | 0.96349 | 2603.76141 | 0.963   | 2603.76141 | 0.99403 |
| 2602.33234 | 1.00065 | 2602.33234 | 0.96375 | 2602.33234 | 0.9636  | 2602.33234 | 0.99473 |
| 2600.90327 | 1.00084 | 2600.90327 | 0.96405 | 2600.90327 | 0.96422 | 2600.90327 | 0.99541 |
| 2599.4742  | 1.00102 | 2599.4742  | 0.96441 | 2599.4742  | 0.96479 | 2599.4742  | 0.99607 |
| 2598.04513 | 1.00119 | 2598.04513 | 0.96483 | 2598.04513 | 0.96524 | 2598.04513 | 0.9967  |
| 2596.61607 | 1.00133 | 2596.61607 | 0.96528 | 2596.61607 | 0.96561 | 2596.61607 | 0.99726 |
| 2595.187   | 1.00144 | 2595.187   | 0.96576 | 2595.187   | 0.96604 | 2595.187   | 0.99775 |
| 2593.75793 | 1.00153 | 2593.75793 | 0.96623 | 2593.75793 | 0.96664 | 2593.75793 | 0.99821 |
| 2592.32886 | 1.00158 | 2592.32886 | 0.96668 | 2592.32886 | 0.96734 | 2592.32886 | 0.99862 |
| 2590.8998  | 1.0016  | 2590.8998  | 0.96706 | 2590.8998  | 0.96801 | 2590.8998  | 0.99899 |
| 2589.47073 | 1.00157 | 2589.47073 | 0.96737 | 2589.47073 | 0.96856 | 2589.47073 | 0.99931 |
| 2588.04166 | 1.00158 | 2588.04166 | 0.96761 | 2588.04166 | 0.969   | 2588.04166 | 0.99958 |
| 2586.61259 | 1.00159 | 2586.61259 | 0.96778 | 2586.61259 | 0.96937 | 2586.61259 | 0.9998  |
| 2585.18353 | 1.00157 | 2585.18353 | 0.96791 | 2585.18353 | 0.96967 | 2585.18353 | 0.99996 |
| 2583.75446 | 1.00152 | 2583.75446 | 0.96803 | 2583.75446 | 0.96995 | 2583.75446 | 1.00007 |
| 2582.32539 | 1.00153 | 2582.32539 | 0.96817 | 2582.32539 | 0.97029 | 2582.32539 | 1.00014 |
| 2580.89632 | 1.0015  | 2580.89632 | 0.96835 | 2580.89632 | 0.97071 | 2580.89632 | 1.00016 |
| 2579.46725 | 1.00146 | 2579.46725 | 0.96858 | 2579.46725 | 0.97113 | 2579.46725 | 1.00015 |
| 2578.03819 | 1.00139 | 2578.03819 | 0.96886 | 2578.03819 | 0.97149 | 2578.03819 | 1.0001  |
| 2576.60912 | 1.00129 | 2576.60912 | 0.96919 | 2576.60912 | 0.97178 | 2576.60912 | 1       |
| 2575.18005 | 1.00117 | 2575.18005 | 0.96955 | 2575.18005 | 0.97203 | 2575.18005 | 0.99993 |
| 2573.75098 | 1.00121 | 2573.75098 | 0.96993 | 2573.75098 | 0.97231 | 2573.75098 | 0.99984 |
| 2572.32192 | 1.00122 | 2572.32192 | 0.97028 | 2572.32192 | 0.97259 | 2572.32192 | 0.99972 |
| 2570.89285 | 1.00119 | 2570.89285 | 0.97059 | 2570.89285 | 0.97287 | 2570.89285 | 0.99966 |
| 2569.46378 | 1.00113 | 2569.46378 | 0.97085 | 2569.46378 | 0.97315 | 2569.46378 | 0.99956 |
| 2568.03471 | 1.00104 | 2568.03471 | 0.97104 | 2568.03471 | 0.97341 | 2568.03471 | 0.9995  |
| 2566.60564 | 1.00094 | 2566.60564 | 0.97119 | 2566.60564 | 0.97364 | 2566.60564 | 0.99948 |
| 2565.17658 | 1.00084 | 2565.17658 | 0.9713  | 2565.17658 | 0.97388 | 2565.17658 | 0.99942 |
| 2563.74751 | 1.00074 | 2563.74751 | 0.97137 | 2563.74751 | 0.97415 | 2563.74751 | 0.99934 |
| 2562.31844 | 1.00065 | 2562.31844 | 0.97141 | 2562.31844 | 0.97442 | 2562.31844 | 0.99924 |
| 2560.88937 | 1.00056 | 2560.88937 | 0.97149 | 2560.88937 | 0.9746  | 2560.88937 | 0.99915 |
| 2559.46031 | 1.00045 | 2559.46031 | 0.97162 | 2559.46031 | 0.97469 | 2559.46031 | 0.99906 |
| 2558.03124 | 1.00032 | 2558.03124 | 0.97181 | 2558.03124 | 0.97475 | 2558.03124 | 0.99894 |
| 2556.60217 | 1.00014 | 2556.60217 | 0.97205 | 2556.60217 | 0.97484 | 2556.60217 | 0.99876 |
| 2555.1731  | 1.00013 | 2555.1731  | 0.97231 | 2555.1731  | 0.97496 | 2555.1731  | 0.99854 |
| 2553.74404 | 1.00009 | 2553.74404 | 0.97257 | 2553.74404 | 0.97508 | 2553.74404 | 0.9983  |
| 2552.31497 | 1       | 2552.31497 | 0.97282 | 2552.31497 | 0.97525 | 2552.31497 | 0.99807 |
| 2550.8859  | 0.99989 | 2550.8859  | 0.97304 | 2550.8859  | 0.97548 | 2550.8859  | 0.99787 |
| 2549.45683 | 1.00008 | 2549.45683 | 0.97322 | 2549.45683 | 0.9757  | 2549.45683 | 0.99767 |
| 2548.02776 | 1.00027 | 2548.02776 | 0.97334 | 2548.02776 | 0.97582 | 2548.02776 | 0.99745 |
| 2546.5987  | 1.00044 | 2546.5987  | 0.9734  | 2546.5987  | 0.97579 | 2546.5987  | 0.99719 |
| 2545.16963 | 1.00058 | 2545.16963 | 0.9734  | 2545.16963 | 0.97568 | 2545.16963 | 0.9969  |
| 2543.74056 | 1.00068 | 2543.74056 | 0.97335 | 2543.74056 | 0.9756  | 2543.74056 | 0.9966  |
| 2542.31149 | 1.00075 | 2542.31149 | 0.97327 | 2542.31149 | 0.97558 | 2542.31149 | 0.99632 |
| 2540.88243 | 1.00079 | 2540.88243 | 0.97318 | 2540.88243 | 0.97558 | 2540.88243 | 0.99604 |
| 2539.45336 | 1.0008  | 2539.45336 | 0.97311 | 2539.45336 | 0.97556 | 2539.45336 | 0.99576 |
| 2538.02429 | 1.00079 | 2538.02429 | 0.97304 | 2538.02429 | 0.9755  | 2538.02429 | 0.99548 |
| 2536.59522 | 1.00075 | 2536.59522 | 0.97299 | 2536.59522 | 0.97541 | 2536.59522 | 0.9952  |
| 2535.16615 | 1.00068 | 2535.16615 | 0.97294 | 2535.16615 | 0.97528 | 2535.16615 | 0.99494 |

|            |         |            |         |            |         |            |         |
|------------|---------|------------|---------|------------|---------|------------|---------|
| 2533.73709 | 1.00058 | 2533.73709 | 0.97291 | 2533.73709 | 0.97511 | 2533.73709 | 0.9947  |
| 2532.30802 | 1.00043 | 2532.30802 | 0.9729  | 2532.30802 | 0.97489 | 2532.30802 | 0.99448 |
| 2530.87895 | 1.00024 | 2530.87895 | 0.97287 | 2530.87895 | 0.97464 | 2530.87895 | 0.99425 |
| 2529.44988 | 1.00002 | 2529.44988 | 0.97281 | 2529.44988 | 0.9744  | 2529.44988 | 0.994   |
| 2528.02082 | 0.99978 | 2528.02082 | 0.9727  | 2528.02082 | 0.97417 | 2528.02082 | 0.99376 |
| 2526.59175 | 0.99954 | 2526.59175 | 0.97257 | 2526.59175 | 0.97395 | 2526.59175 | 0.99353 |
| 2525.16268 | 0.99929 | 2525.16268 | 0.97241 | 2525.16268 | 0.9737  | 2525.16268 | 0.99333 |
| 2523.73361 | 0.99905 | 2523.73361 | 0.97224 | 2523.73361 | 0.97342 | 2523.73361 | 0.99315 |
| 2522.30455 | 0.99881 | 2522.30455 | 0.97208 | 2522.30455 | 0.97313 | 2522.30455 | 0.99302 |
| 2520.87548 | 0.99858 | 2520.87548 | 0.97196 | 2520.87548 | 0.97289 | 2520.87548 | 0.99295 |
| 2519.44641 | 0.99836 | 2519.44641 | 0.9719  | 2519.44641 | 0.97275 | 2519.44641 | 0.99289 |
| 2518.01734 | 0.99818 | 2518.01734 | 0.97193 | 2518.01734 | 0.97272 | 2518.01734 | 0.99282 |
| 2516.58827 | 0.99803 | 2516.58827 | 0.97204 | 2516.58827 | 0.97273 | 2516.58827 | 0.99273 |
| 2515.15921 | 0.99791 | 2515.15921 | 0.97222 | 2515.15921 | 0.97273 | 2515.15921 | 0.99266 |
| 2513.73014 | 0.99781 | 2513.73014 | 0.97248 | 2513.73014 | 0.97273 | 2513.73014 | 0.99262 |
| 2512.30107 | 0.99773 | 2512.30107 | 0.97282 | 2512.30107 | 0.97282 | 2512.30107 | 0.99261 |
| 2510.872   | 0.99767 | 2510.872   | 0.97325 | 2510.872   | 0.97305 | 2510.872   | 0.99267 |
| 2509.44294 | 0.99766 | 2509.44294 | 0.97377 | 2509.44294 | 0.97337 | 2509.44294 | 0.9928  |
| 2508.01387 | 0.99772 | 2508.01387 | 0.97436 | 2508.01387 | 0.97372 | 2508.01387 | 0.99301 |
| 2506.5848  | 0.99783 | 2506.5848  | 0.97501 | 2506.5848  | 0.97414 | 2506.5848  | 0.99327 |
| 2505.15573 | 0.99797 | 2505.15573 | 0.97569 | 2505.15573 | 0.97463 | 2505.15573 | 0.99355 |
| 2503.72666 | 0.99812 | 2503.72666 | 0.9764  | 2503.72666 | 0.97518 | 2503.72666 | 0.99384 |
| 2502.2976  | 0.99829 | 2502.2976  | 0.97714 | 2502.2976  | 0.97579 | 2502.2976  | 0.99412 |
| 2500.86853 | 0.99848 | 2500.86853 | 0.97793 | 2500.86853 | 0.97644 | 2500.86853 | 0.99439 |
| 2499.43946 | 0.99869 | 2499.43946 | 0.97875 | 2499.43946 | 0.97712 | 2499.43946 | 0.99465 |
| 2498.01039 | 0.99889 | 2498.01039 | 0.9796  | 2498.01039 | 0.97781 | 2498.01039 | 0.99495 |
| 2496.58133 | 0.99908 | 2496.58133 | 0.98048 | 2496.58133 | 0.97854 | 2496.58133 | 0.99531 |
| 2495.15226 | 0.99928 | 2495.15226 | 0.98141 | 2495.15226 | 0.97934 | 2495.15226 | 0.99574 |
| 2493.72319 | 0.99952 | 2493.72319 | 0.98237 | 2493.72319 | 0.98014 | 2493.72319 | 0.99619 |
| 2492.29412 | 0.99975 | 2492.29412 | 0.98334 | 2492.29412 | 0.98093 | 2492.29412 | 0.99662 |
| 2490.86505 | 0.99994 | 2490.86505 | 0.9843  | 2490.86505 | 0.98171 | 2490.86505 | 0.99702 |
| 2489.43599 | 1.00009 | 2489.43599 | 0.98521 | 2489.43599 | 0.98252 | 2489.43599 | 0.99739 |
| 2488.00692 | 1.00019 | 2488.00692 | 0.98607 | 2488.00692 | 0.98332 | 2488.00692 | 0.99772 |
| 2486.57785 | 1.00025 | 2486.57785 | 0.98688 | 2486.57785 | 0.98407 | 2486.57785 | 0.99803 |
| 2485.14878 | 1.00026 | 2485.14878 | 0.98762 | 2485.14878 | 0.98475 | 2485.14878 | 0.99832 |
| 2483.71972 | 1.00024 | 2483.71972 | 0.9883  | 2483.71972 | 0.98538 | 2483.71972 | 0.99862 |
| 2482.29065 | 1.00022 | 2482.29065 | 0.98893 | 2482.29065 | 0.98603 | 2482.29065 | 0.99891 |
| 2480.86158 | 1.0002  | 2480.86158 | 0.98953 | 2480.86158 | 0.98675 | 2480.86158 | 0.9992  |
| 2479.43251 | 1.00015 | 2479.43251 | 0.99009 | 2479.43251 | 0.98754 | 2479.43251 | 0.99946 |
| 2478.00345 | 1.00009 | 2478.00345 | 0.99063 | 2478.00345 | 0.98834 | 2478.00345 | 0.99967 |
| 2476.57438 | 1       | 2476.57438 | 0.99116 | 2476.57438 | 0.98911 | 2476.57438 | 0.99982 |
| 2475.14531 | 0.99993 | 2475.14531 | 0.99169 | 2475.14531 | 0.98985 | 2475.14531 | 0.99992 |
| 2473.71624 | 0.99987 | 2473.71624 | 0.99222 | 2473.71624 | 0.99053 | 2473.71624 | 0.99998 |
| 2472.28717 | 0.99981 | 2472.28717 | 0.99277 | 2472.28717 | 0.99115 | 2472.28717 | 1.00003 |
| 2470.85811 | 0.99974 | 2470.85811 | 0.9933  | 2470.85811 | 0.99175 | 2470.85811 | 1.00005 |
| 2469.42904 | 0.99966 | 2469.42904 | 0.99379 | 2469.42904 | 0.99237 | 2469.42904 | 1.00004 |
| 2467.99997 | 0.99955 | 2467.99997 | 0.99425 | 2467.99997 | 0.99298 | 2467.99997 | 1       |
| 2466.5709  | 0.99951 | 2466.5709  | 0.99466 | 2466.5709  | 0.99355 | 2466.5709  | 0.99997 |
| 2465.14184 | 0.99949 | 2465.14184 | 0.99503 | 2465.14184 | 0.99407 | 2465.14184 | 0.99993 |
| 2463.71277 | 0.99945 | 2463.71277 | 0.99537 | 2463.71277 | 0.99458 | 2463.71277 | 0.99985 |
| 2462.2837  | 0.99937 | 2462.2837  | 0.99566 | 2462.2837  | 0.9951  | 2462.2837  | 0.99981 |
| 2460.85463 | 0.99933 | 2460.85463 | 0.99594 | 2460.85463 | 0.99562 | 2460.85463 | 0.99972 |
| 2459.42556 | 0.99926 | 2459.42556 | 0.9962  | 2459.42556 | 0.99612 | 2459.42556 | 0.9997  |
| 2457.9965  | 0.99918 | 2457.9965  | 0.99646 | 2457.9965  | 0.99658 | 2457.9965  | 0.99964 |

|            |         |            |         |            |         |            |         |
|------------|---------|------------|---------|------------|---------|------------|---------|
| 2456.56743 | 0.99909 | 2456.56743 | 0.99672 | 2456.56743 | 0.997   | 2456.56743 | 0.99955 |
| 2455.13836 | 0.999   | 2455.13836 | 0.99697 | 2455.13836 | 0.99738 | 2455.13836 | 0.99946 |
| 2453.70929 | 0.99901 | 2453.70929 | 0.9972  | 2453.70929 | 0.99773 | 2453.70929 | 0.99941 |
| 2452.28023 | 0.99899 | 2452.28023 | 0.99742 | 2452.28023 | 0.99804 | 2452.28023 | 0.99941 |
| 2450.85116 | 0.99893 | 2450.85116 | 0.99764 | 2450.85116 | 0.99836 | 2450.85116 | 0.99941 |
| 2449.42209 | 0.9989  | 2449.42209 | 0.99788 | 2449.42209 | 0.9987  | 2449.42209 | 0.99938 |
| 2447.99302 | 0.99884 | 2447.99302 | 0.9981  | 2447.99302 | 0.999   | 2447.99302 | 0.99938 |
| 2446.56396 | 0.99877 | 2446.56396 | 0.99831 | 2446.56396 | 0.99921 | 2446.56396 | 0.99933 |
| 2445.13489 | 0.99872 | 2445.13489 | 0.99849 | 2445.13489 | 0.99937 | 2445.13489 | 0.99926 |
| 2443.70582 | 0.99865 | 2443.70582 | 0.99865 | 2443.70582 | 0.99951 | 2443.70582 | 0.99918 |
| 2442.27675 | 0.99856 | 2442.27675 | 0.99881 | 2442.27675 | 0.99967 | 2442.27675 | 0.99913 |
| 2440.84768 | 0.99844 | 2440.84768 | 0.99897 | 2440.84768 | 0.99984 | 2440.84768 | 0.99909 |
| 2439.41862 | 0.99829 | 2439.41862 | 0.99911 | 2439.41862 | 1       | 2439.41862 | 0.99908 |
| 2437.98955 | 0.99854 | 2437.98955 | 0.99923 | 2437.98955 | 1.00018 | 2437.98955 | 0.99915 |
| 2436.56048 | 0.99877 | 2436.56048 | 0.99933 | 2436.56048 | 1.00034 | 2436.56048 | 0.99919 |
| 2435.13141 | 0.99899 | 2435.13141 | 0.99939 | 2435.13141 | 1.00047 | 2435.13141 | 0.99921 |
| 2433.70235 | 0.99916 | 2433.70235 | 0.99941 | 2433.70235 | 1.00054 | 2433.70235 | 0.99922 |
| 2432.27328 | 0.99929 | 2432.27328 | 0.9994  | 2432.27328 | 1.00053 | 2432.27328 | 0.99923 |
| 2430.84421 | 0.99938 | 2430.84421 | 0.99939 | 2430.84421 | 1.00042 | 2430.84421 | 0.99923 |
| 2429.41514 | 0.99946 | 2429.41514 | 0.99937 | 2429.41514 | 1.00028 | 2429.41514 | 0.99921 |
| 2427.98607 | 0.99954 | 2427.98607 | 0.99937 | 2427.98607 | 1.00013 | 2427.98607 | 0.9992  |
| 2426.55701 | 0.99962 | 2426.55701 | 0.99941 | 2426.55701 | 1.00002 | 2426.55701 | 0.99921 |
| 2425.12794 | 0.99971 | 2425.12794 | 0.99951 | 2425.12794 | 0.99999 | 2425.12794 | 0.99926 |
| 2423.69887 | 0.9998  | 2423.69887 | 0.99965 | 2423.69887 | 1.00002 | 2423.69887 | 0.99933 |
| 2422.2698  | 0.99988 | 2422.2698  | 0.99979 | 2422.2698  | 1       | 2422.2698  | 0.99941 |
| 2420.84074 | 0.99993 | 2420.84074 | 0.99989 | 2420.84074 | 0.9999  | 2420.84074 | 0.99948 |
| 2419.41167 | 0.99997 | 2419.41167 | 0.99995 | 2419.41167 | 0.9998  | 2419.41167 | 0.99954 |
| 2417.9826  | 1       | 2417.9826  | 0.99999 | 2417.9826  | 0.99976 | 2417.9826  | 0.99957 |
| 2416.55353 | 1.00004 | 2416.55353 | 1.00001 | 2416.55353 | 0.99973 | 2416.55353 | 0.9996  |
| 2415.12447 | 1.00006 | 2415.12447 | 1       | 2415.12447 | 0.9997  | 2415.12447 | 0.99965 |
| 2413.6954  | 1.00007 | 2413.6954  | 0.99998 | 2413.6954  | 0.99969 | 2413.6954  | 0.99971 |
| 2412.26633 | 1.00006 | 2412.26633 | 0.99995 | 2412.26633 | 0.9997  | 2412.26633 | 0.99977 |
| 2410.83726 | 1.00004 | 2410.83726 | 0.99989 | 2410.83726 | 0.99969 | 2410.83726 | 0.99984 |
| 2409.40819 | 1       | 2409.40819 | 0.99982 | 2409.40819 | 0.99967 | 2409.40819 | 0.9999  |
| 2407.97913 | 0.99997 | 2407.97913 | 0.99974 | 2407.97913 | 0.99964 | 2407.97913 | 0.99995 |
| 2406.55006 | 0.99992 | 2406.55006 | 0.99969 | 2406.55006 | 0.99961 | 2406.55006 | 0.99998 |
| 2405.12099 | 0.99987 | 2405.12099 | 0.99968 | 2405.12099 | 0.99957 | 2405.12099 | 0.99999 |
| 2403.69192 | 0.99985 | 2403.69192 | 0.99971 | 2403.69192 | 0.99958 | 2403.69192 | 1.00001 |
| 2402.26286 | 0.99982 | 2402.26286 | 0.99975 | 2402.26286 | 0.99954 | 2402.26286 | 1.00001 |
| 2400.83379 | 0.99979 | 2400.83379 | 0.99979 | 2400.83379 | 0.99951 | 2400.83379 | 1       |
| 2399.40472 | 1.00022 | 2399.40472 | 1.00017 | 2399.40472 | 1.00004 | 2399.40472 | 1.00038 |
| 2397.97565 | 1.00063 | 2397.97565 | 1.00055 | 2397.97565 | 1.00055 | 2397.97565 | 1.00075 |
| 2396.54658 | 1.00101 | 2396.54658 | 1.00089 | 2396.54658 | 1.00102 | 2396.54658 | 1.00108 |
| 2395.11752 | 1.00138 | 2395.11752 | 1.00118 | 2395.11752 | 1.0015  | 2395.11752 | 1.00139 |
| 2393.68845 | 1.00173 | 2393.68845 | 1.00138 | 2393.68845 | 1.00198 | 2393.68845 | 1.0017  |
| 2392.25938 | 1.00204 | 2392.25938 | 1.00146 | 2392.25938 | 1.00239 | 2392.25938 | 1.00202 |
| 2390.83031 | 1.00225 | 2390.83031 | 1.00133 | 2390.83031 | 1.00257 | 2390.83031 | 1.00237 |
| 2389.40125 | 1.00232 | 2389.40125 | 1.00084 | 2389.40125 | 1.00235 | 2389.40125 | 1.00274 |
| 2387.97218 | 1.00217 | 2387.97218 | 0.99977 | 2387.97218 | 1.0015  | 2387.97218 | 1.00315 |
| 2386.54311 | 1.00169 | 2386.54311 | 0.99793 | 2386.54311 | 0.99973 | 2386.54311 | 1.00362 |
| 2385.11404 | 1.00082 | 2385.11404 | 0.99515 | 2385.11404 | 0.99667 | 2385.11404 | 1.00406 |
| 2383.68498 | 0.99956 | 2383.68498 | 0.99143 | 2383.68498 | 0.99205 | 2383.68498 | 1.00433 |
| 2382.25591 | 0.99804 | 2382.25591 | 0.98702 | 2382.25591 | 0.98581 | 2382.25591 | 1.00426 |
| 2380.82684 | 0.99644 | 2380.82684 | 0.98233 | 2380.82684 | 0.97819 | 2380.82684 | 1.00371 |

|            |         |            |         |            |         |            |         |
|------------|---------|------------|---------|------------|---------|------------|---------|
| 2379.39777 | 0.99494 | 2379.39777 | 0.97781 | 2379.39777 | 0.96959 | 2379.39777 | 1.00262 |
| 2377.9687  | 0.99366 | 2377.9687  | 0.97374 | 2377.9687  | 0.96035 | 2377.9687  | 1.00091 |
| 2376.53964 | 0.99265 | 2376.53964 | 0.9701  | 2376.53964 | 0.95052 | 2376.53964 | 0.99857 |
| 2375.11057 | 0.9919  | 2375.11057 | 0.96675 | 2375.11057 | 0.93996 | 2375.11057 | 0.99559 |
| 2373.6815  | 0.99134 | 2373.6815  | 0.96358 | 2373.6815  | 0.92856 | 2373.6815  | 0.99198 |
| 2372.25243 | 0.9909  | 2372.25243 | 0.96058 | 2372.25243 | 0.91637 | 2372.25243 | 0.98774 |
| 2370.82337 | 0.99058 | 2370.82337 | 0.95793 | 2370.82337 | 0.90372 | 2370.82337 | 0.98287 |
| 2369.3943  | 0.99054 | 2369.3943  | 0.95591 | 2369.3943  | 0.89123 | 2369.3943  | 0.97752 |
| 2367.96523 | 0.9909  | 2367.96523 | 0.95473 | 2367.96523 | 0.87955 | 2367.96523 | 0.97199 |
| 2366.53616 | 0.99168 | 2366.53616 | 0.95452 | 2366.53616 | 0.86905 | 2366.53616 | 0.96648 |
| 2365.10709 | 0.99285 | 2365.10709 | 0.9554  | 2365.10709 | 0.85997 | 2365.10709 | 0.96103 |
| 2363.67803 | 0.99428 | 2363.67803 | 0.95737 | 2363.67803 | 0.85261 | 2363.67803 | 0.95576 |
| 2362.24896 | 0.99589 | 2362.24896 | 0.96032 | 2362.24896 | 0.84737 | 2362.24896 | 0.95098 |
| 2360.81989 | 0.99766 | 2360.81989 | 0.96432 | 2360.81989 | 0.8448  | 2360.81989 | 0.94693 |
| 2359.39082 | 0.99968 | 2359.39082 | 0.9696  | 2359.39082 | 0.84554 | 2359.39082 | 0.94375 |
| 2357.96176 | 1.00209 | 2357.96176 | 0.97637 | 2357.96176 | 0.85029 | 2357.96176 | 0.94171 |
| 2356.53269 | 1.0048  | 2356.53269 | 0.98434 | 2356.53269 | 0.85924 | 2356.53269 | 0.94114 |
| 2355.10362 | 1.00761 | 2355.10362 | 0.99294 | 2355.10362 | 0.87172 | 2355.10362 | 0.94199 |
| 2353.67455 | 1.0103  | 2353.67455 | 1.00165 | 2353.67455 | 0.88678 | 2353.67455 | 0.944   |
| 2352.24549 | 1.01181 | 2352.24549 | 1.00764 | 2352.24549 | 0.90275 | 2352.24549 | 0.94816 |
| 2350.81642 | 1.01032 | 2350.81642 | 1.00606 | 2350.81642 | 0.91599 | 2350.81642 | 0.95622 |
| 2349.38735 | 1.00522 | 2349.38735 | 0.99531 | 2349.38735 | 0.92254 | 2349.38735 | 0.96766 |
| 2347.95828 | 0.998   | 2347.95828 | 0.97924 | 2347.95828 | 0.9207  | 2347.95828 | 0.979   |
| 2346.52921 | 0.99164 | 2346.52921 | 0.96501 | 2346.52921 | 0.91164 | 2346.52921 | 0.98542 |
| 2345.10015 | 0.98933 | 2345.10015 | 0.95973 | 2345.10015 | 0.89963 | 2345.10015 | 0.98353 |
| 2343.67108 | 0.99159 | 2343.67108 | 0.96426 | 2343.67108 | 0.89051 | 2343.67108 | 0.97551 |
| 2342.24201 | 0.99529 | 2342.24201 | 0.97183 | 2342.24201 | 0.88685 | 2342.24201 | 0.96793 |
| 2340.81294 | 0.99783 | 2340.81294 | 0.97727 | 2340.81294 | 0.88693 | 2340.81294 | 0.96408 |
| 2339.38388 | 0.99914 | 2339.38388 | 0.98059 | 2339.38388 | 0.88869 | 2339.38388 | 0.96286 |
| 2337.95481 | 0.99978 | 2337.95481 | 0.98273 | 2337.95481 | 0.89103 | 2337.95481 | 0.96284 |
| 2336.52574 | 1.00006 | 2336.52574 | 0.984   | 2336.52574 | 0.89331 | 2336.52574 | 0.96347 |
| 2335.09667 | 1.00007 | 2335.09667 | 0.98438 | 2335.09667 | 0.89514 | 2335.09667 | 0.96455 |
| 2333.6676  | 0.99988 | 2333.6676  | 0.98413 | 2333.6676  | 0.89643 | 2333.6676  | 0.9657  |
| 2332.23854 | 0.99989 | 2332.23854 | 0.9844  | 2332.23854 | 0.89762 | 2332.23854 | 0.96619 |
| 2330.80947 | 1.00055 | 2330.80947 | 0.98623 | 2330.80947 | 0.89957 | 2330.80947 | 0.96576 |
| 2329.3804  | 1.00164 | 2329.3804  | 0.98898 | 2329.3804  | 0.90277 | 2329.3804  | 0.96525 |
| 2327.95133 | 1.00242 | 2327.95133 | 0.99096 | 2327.95133 | 0.90681 | 2327.95133 | 0.96579 |
| 2326.52227 | 1.00254 | 2326.52227 | 0.99148 | 2326.52227 | 0.91099 | 2326.52227 | 0.96751 |
| 2325.0932  | 1.00231 | 2325.0932  | 0.99145 | 2325.0932  | 0.91498 | 2325.0932  | 0.96955 |
| 2323.66413 | 1.00236 | 2323.66413 | 0.99231 | 2323.66413 | 0.91907 | 2323.66413 | 0.97103 |
| 2322.23506 | 1.003   | 2322.23506 | 0.99475 | 2322.23506 | 0.92392 | 2322.23506 | 0.97185 |
| 2320.80599 | 1.004   | 2320.80599 | 0.99806 | 2320.80599 | 0.92992 | 2320.80599 | 0.9727  |
| 2319.37693 | 1.00484 | 2319.37693 | 1.00093 | 2319.37693 | 0.93671 | 2319.37693 | 0.97429 |
| 2317.94786 | 1.00514 | 2317.94786 | 1.00237 | 2317.94786 | 0.94337 | 2317.94786 | 0.97682 |
| 2316.51879 | 1.00485 | 2316.51879 | 1.00228 | 2316.51879 | 0.94897 | 2316.51879 | 0.97986 |
| 2315.08972 | 1.00426 | 2315.08972 | 1.00143 | 2315.08972 | 0.9531  | 2315.08972 | 0.98264 |
| 2313.66066 | 1.00387 | 2313.66066 | 1.00093 | 2313.66066 | 0.95609 | 2313.66066 | 0.98457 |
| 2312.23159 | 1.00394 | 2312.23159 | 1.0013  | 2312.23159 | 0.95878 | 2312.23159 | 0.98565 |
| 2310.80252 | 1.00437 | 2310.80252 | 1.00224 | 2310.80252 | 0.96195 | 2310.80252 | 0.98646 |
| 2309.37345 | 1.00492 | 2309.37345 | 1.00322 | 2309.37345 | 0.96587 | 2309.37345 | 0.98751 |
| 2307.94439 | 1.00544 | 2307.94439 | 1.00401 | 2307.94439 | 0.9703  | 2307.94439 | 0.98889 |
| 2306.51532 | 1.00584 | 2306.51532 | 1.0045  | 2306.51532 | 0.97476 | 2306.51532 | 0.9905  |
| 2305.08625 | 1.00606 | 2305.08625 | 1.00461 | 2305.08625 | 0.97883 | 2305.08625 | 0.99218 |
| 2303.65718 | 1.00613 | 2303.65718 | 1.00437 | 2303.65718 | 0.98224 | 2303.65718 | 0.99375 |

|            |         |            |         |            |         |            |         |
|------------|---------|------------|---------|------------|---------|------------|---------|
| 2302.22811 | 1.00612 | 2302.22811 | 1.00401 | 2302.22811 | 0.98498 | 2302.22811 | 0.99504 |
| 2300.79905 | 1.00615 | 2300.79905 | 1.00381 | 2300.79905 | 0.98726 | 2300.79905 | 0.99602 |
| 2299.36998 | 1.00624 | 2299.36998 | 1.00386 | 2299.36998 | 0.98936 | 2299.36998 | 0.99682 |
| 2297.94091 | 1.00633 | 2297.94091 | 1.00402 | 2297.94091 | 0.99136 | 2297.94091 | 0.99757 |
| 2296.51184 | 1.00638 | 2296.51184 | 1.00421 | 2296.51184 | 0.99325 | 2296.51184 | 0.99827 |
| 2295.08278 | 1.00641 | 2295.08278 | 1.00444 | 2295.08278 | 0.99503 | 2295.08278 | 0.99886 |
| 2293.65371 | 1.00641 | 2293.65371 | 1.00468 | 2293.65371 | 0.99673 | 2293.65371 | 0.99935 |
| 2292.22464 | 1.00636 | 2292.22464 | 1.00488 | 2292.22464 | 0.99837 | 2292.22464 | 0.99977 |
| 2290.79557 | 1.00624 | 2290.79557 | 1.00501 | 2290.79557 | 0.99992 | 2290.79557 | 1.00014 |
| 2289.3665  | 1.00605 | 2289.3665  | 1.00505 | 2289.3665  | 1.00135 | 2289.3665  | 1.00049 |
| 2287.93744 | 1.0058  | 2287.93744 | 1.00501 | 2287.93744 | 1.00263 | 2287.93744 | 1.00084 |
| 2286.50837 | 1.00547 | 2286.50837 | 1.00484 | 2286.50837 | 1.00373 | 2286.50837 | 1.00121 |
| 2285.0793  | 1.005   | 2285.0793  | 1.00441 | 2285.0793  | 1.00452 | 2285.0793  | 1.00165 |
| 2283.65023 | 1.00437 | 2283.65023 | 1.00363 | 2283.65023 | 1.00485 | 2283.65023 | 1.0021  |
| 2282.22117 | 1.00365 | 2282.22117 | 1.00267 | 2282.22117 | 1.00462 | 2282.22117 | 1.00239 |
| 2280.7921  | 1.00293 | 2280.7921  | 1.00179 | 2280.7921  | 1.00397 | 2280.7921  | 1.00236 |
| 2279.36303 | 1.0023  | 2279.36303 | 1.00116 | 2279.36303 | 1.00313 | 2279.36303 | 1.00204 |
| 2277.93396 | 1.00173 | 2277.93396 | 1.00078 | 2277.93396 | 1.00231 | 2277.93396 | 1.00153 |
| 2276.5049  | 1.00118 | 2276.5049  | 1.00052 | 2276.5049  | 1.00155 | 2276.5049  | 1.00097 |
| 2275.07583 | 1.00061 | 2275.07583 | 1.00027 | 2275.07583 | 1.00078 | 2275.07583 | 1.00045 |
| 2273.64676 | 1       | 2273.64676 | 1       | 2273.64676 | 1       | 2273.64676 | 1       |
| 2272.21769 | 0.99997 | 2272.21769 | 1       | 2272.21769 | 0.99985 | 2272.21769 | 0.99971 |
| 2270.78862 | 0.99998 | 2270.78862 | 1       | 2270.78862 | 0.99977 | 2270.78862 | 0.99965 |
| 2269.35956 | 1.00002 | 2269.35956 | 0.99994 | 2269.35956 | 0.99975 | 2269.35956 | 0.99965 |
| 2267.93049 | 1.00004 | 2267.93049 | 0.99982 | 2267.93049 | 0.99976 | 2267.93049 | 0.99966 |
| 2266.50142 | 1.00002 | 2266.50142 | 0.99966 | 2266.50142 | 0.99976 | 2266.50142 | 0.99964 |
| 2265.07235 | 0.99999 | 2265.07235 | 0.99948 | 2265.07235 | 0.99971 | 2265.07235 | 0.99957 |
| 2263.64329 | 0.99996 | 2263.64329 | 0.9993  | 2263.64329 | 0.99967 | 2263.64329 | 0.99948 |
| 2262.21422 | 0.99995 | 2262.21422 | 0.99911 | 2262.21422 | 0.9997  | 2262.21422 | 0.99941 |
| 2260.78515 | 0.99996 | 2260.78515 | 0.99893 | 2260.78515 | 0.99977 | 2260.78515 | 0.99937 |
| 2259.35608 | 0.99998 | 2259.35608 | 0.99879 | 2259.35608 | 0.99981 | 2259.35608 | 0.9994  |
| 2257.92701 | 1       | 2257.92701 | 0.99868 | 2257.92701 | 0.9998  | 2257.92701 | 0.9995  |
| 2256.49795 | 1.00002 | 2256.49795 | 0.9986  | 2256.49795 | 0.99979 | 2256.49795 | 0.99963 |
| 2255.06888 | 1.00003 | 2255.06888 | 0.99855 | 2255.06888 | 0.99984 | 2255.06888 | 0.99975 |
| 2253.63981 | 1.00002 | 2253.63981 | 0.99852 | 2253.63981 | 0.99989 | 2253.63981 | 0.99983 |
| 2252.21074 | 1       | 2252.21074 | 0.99847 | 2252.21074 | 0.99989 | 2252.21074 | 0.99988 |
| 2250.78168 | 1       | 2250.78168 | 0.99842 | 2250.78168 | 0.99997 | 2250.78168 | 0.99991 |
| 2249.35261 | 0.99997 | 2249.35261 | 0.99835 | 2249.35261 | 1.00001 | 2249.35261 | 0.99991 |
| 2247.92354 | 0.99997 | 2247.92354 | 0.99824 | 2247.92354 | 1.00001 | 2247.92354 | 0.9999  |
| 2246.49447 | 1       | 2246.49447 | 0.9981  | 2246.49447 | 1       | 2246.49447 | 0.99989 |
| 2245.06541 | 1       | 2245.06541 | 0.99792 | 2245.06541 | 1       | 2245.06541 | 0.9999  |
| 2243.63634 | 0.99999 | 2243.63634 | 0.99768 | 2243.63634 | 1       | 2243.63634 | 0.99994 |
| 2242.20727 | 0.99999 | 2242.20727 | 0.99741 | 2242.20727 | 1       | 2242.20727 | 0.99999 |
| 2240.7782  | 0.99999 | 2240.7782  | 0.99713 | 2240.7782  | 0.99995 | 2240.7782  | 1.00001 |
| 2239.34913 | 1.00002 | 2239.34913 | 0.99689 | 2239.34913 | 0.99983 | 2239.34913 | 1.00001 |
| 2237.92007 | 1.00002 | 2237.92007 | 0.99669 | 2237.92007 | 0.9997  | 2237.92007 | 1       |
| 2236.491   | 1.00003 | 2236.491   | 0.99653 | 2236.491   | 0.99962 | 2236.491   | 0.99998 |
| 2235.06193 | 1.00003 | 2235.06193 | 0.99641 | 2235.06193 | 0.99955 | 2235.06193 | 0.99997 |
| 2233.63286 | 1.00002 | 2233.63286 | 0.99632 | 2233.63286 | 0.99944 | 2233.63286 | 0.99997 |
| 2232.2038  | 1       | 2232.2038  | 0.99625 | 2232.2038  | 0.9993  | 2232.2038  | 0.99997 |
| 2230.77473 | 0.99998 | 2230.77473 | 0.99621 | 2230.77473 | 0.9992  | 2230.77473 | 0.99997 |
| 2229.34566 | 0.99998 | 2229.34566 | 0.99618 | 2229.34566 | 0.99912 | 2229.34566 | 0.99997 |
| 2227.91659 | 0.99997 | 2227.91659 | 0.99612 | 2227.91659 | 0.99898 | 2227.91659 | 0.99998 |
| 2226.48752 | 0.99998 | 2226.48752 | 0.99602 | 2226.48752 | 0.99873 | 2226.48752 | 0.99999 |

|            |         |            |         |            |         |            |         |
|------------|---------|------------|---------|------------|---------|------------|---------|
| 2225.05846 | 1       | 2225.05846 | 0.99587 | 2225.05846 | 0.99841 | 2225.05846 | 0.99999 |
| 2223.62939 | 1       | 2223.62939 | 0.99566 | 2223.62939 | 0.99803 | 2223.62939 | 0.99999 |
| 2222.20032 | 0.99999 | 2222.20032 | 0.99544 | 2222.20032 | 0.9976  | 2222.20032 | 0.99999 |
| 2220.77125 | 1       | 2220.77125 | 0.99521 | 2220.77125 | 0.99718 | 2220.77125 | 0.99998 |
| 2219.34219 | 1       | 2219.34219 | 0.99502 | 2219.34219 | 0.99677 | 2219.34219 | 0.99998 |
| 2217.91312 | 0.99997 | 2217.91312 | 0.99486 | 2217.91312 | 0.99635 | 2217.91312 | 0.99998 |
| 2216.48405 | 0.99989 | 2216.48405 | 0.99474 | 2216.48405 | 0.99585 | 2216.48405 | 0.99995 |
| 2215.05498 | 0.99975 | 2215.05498 | 0.99465 | 2215.05498 | 0.99525 | 2215.05498 | 0.99998 |
| 2213.62592 | 0.99954 | 2213.62592 | 0.99459 | 2213.62592 | 0.99461 | 2213.62592 | 0.99999 |
| 2212.19685 | 0.99924 | 2212.19685 | 0.99457 | 2212.19685 | 0.99394 | 2212.19685 | 0.99997 |
| 2210.76778 | 0.9989  | 2210.76778 | 0.99458 | 2210.76778 | 0.99322 | 2210.76778 | 0.99996 |
| 2209.33871 | 0.99849 | 2209.33871 | 0.99459 | 2209.33871 | 0.99241 | 2209.33871 | 0.99996 |
| 2207.90964 | 0.998   | 2207.90964 | 0.99457 | 2207.90964 | 0.99148 | 2207.90964 | 0.99998 |
| 2206.48058 | 0.99739 | 2206.48058 | 0.9945  | 2206.48058 | 0.99043 | 2206.48058 | 1       |
| 2205.05151 | 0.99669 | 2205.05151 | 0.99438 | 2205.05151 | 0.98934 | 2205.05151 | 1       |
| 2203.62244 | 0.99596 | 2203.62244 | 0.9942  | 2203.62244 | 0.98832 | 2203.62244 | 0.99999 |
| 2202.19337 | 0.99532 | 2202.19337 | 0.99395 | 2202.19337 | 0.98742 | 2202.19337 | 0.99997 |
| 2200.76431 | 0.99493 | 2200.76431 | 0.99367 | 2200.76431 | 0.98671 | 2200.76431 | 0.99992 |
| 2199.33524 | 0.99492 | 2199.33524 | 0.99338 | 2199.33524 | 0.98624 | 2199.33524 | 0.99985 |
| 2197.90617 | 0.99531 | 2197.90617 | 0.99309 | 2197.90617 | 0.98603 | 2197.90617 | 0.99976 |
| 2196.4771  | 0.99605 | 2196.4771  | 0.99281 | 2196.4771  | 0.98606 | 2196.4771  | 0.99969 |
| 2195.04803 | 0.99698 | 2195.04803 | 0.99257 | 2195.04803 | 0.98622 | 2195.04803 | 0.99965 |
| 2193.61897 | 0.99794 | 2193.61897 | 0.99237 | 2193.61897 | 0.98637 | 2193.61897 | 0.99962 |
| 2192.1899  | 0.99877 | 2192.1899  | 0.99222 | 2192.1899  | 0.98641 | 2192.1899  | 0.99958 |
| 2190.76083 | 0.99938 | 2190.76083 | 0.99209 | 2190.76083 | 0.98628 | 2190.76083 | 0.99951 |
| 2189.33176 | 0.99976 | 2189.33176 | 0.99197 | 2189.33176 | 0.986   | 2189.33176 | 0.99942 |
| 2187.9027  | 0.99996 | 2187.9027  | 0.99184 | 2187.9027  | 0.98562 | 2187.9027  | 0.99931 |
| 2186.47363 | 1       | 2186.47363 | 0.99168 | 2186.47363 | 0.9851  | 2186.47363 | 0.9992  |
| 2185.04456 | 0.99992 | 2185.04456 | 0.99147 | 2185.04456 | 0.98438 | 2185.04456 | 0.9991  |
| 2183.61549 | 0.99968 | 2183.61549 | 0.9912  | 2183.61549 | 0.9835  | 2183.61549 | 0.999   |
| 2182.18643 | 0.99929 | 2182.18643 | 0.99084 | 2182.18643 | 0.98256 | 2182.18643 | 0.99893 |
| 2180.75736 | 0.9988  | 2180.75736 | 0.99039 | 2180.75736 | 0.98162 | 2180.75736 | 0.99888 |
| 2179.32829 | 0.99826 | 2179.32829 | 0.98987 | 2179.32829 | 0.98067 | 2179.32829 | 0.99883 |
| 2177.89922 | 0.9977  | 2177.89922 | 0.98932 | 2177.89922 | 0.9797  | 2177.89922 | 0.99877 |
| 2176.47015 | 0.99712 | 2176.47015 | 0.98876 | 2176.47015 | 0.97871 | 2176.47015 | 0.9987  |
| 2175.04109 | 0.99651 | 2175.04109 | 0.98825 | 2175.04109 | 0.9777  | 2175.04109 | 0.99859 |
| 2173.61202 | 0.99587 | 2173.61202 | 0.98778 | 2173.61202 | 0.97667 | 2173.61202 | 0.99844 |
| 2172.18295 | 0.99521 | 2172.18295 | 0.98736 | 2172.18295 | 0.9756  | 2172.18295 | 0.99826 |
| 2170.75388 | 0.99452 | 2170.75388 | 0.98698 | 2170.75388 | 0.97449 | 2170.75388 | 0.99808 |
| 2169.32482 | 0.99379 | 2169.32482 | 0.98666 | 2169.32482 | 0.97331 | 2169.32482 | 0.99795 |
| 2167.89575 | 0.99304 | 2167.89575 | 0.98636 | 2167.89575 | 0.9721  | 2167.89575 | 0.99788 |
| 2166.46668 | 0.99228 | 2166.46668 | 0.98605 | 2166.46668 | 0.97091 | 2166.46668 | 0.9979  |
| 2165.03761 | 0.99152 | 2165.03761 | 0.98569 | 2165.03761 | 0.96981 | 2165.03761 | 0.99795 |
| 2163.60854 | 0.9908  | 2163.60854 | 0.98528 | 2163.60854 | 0.96883 | 2163.60854 | 0.99796 |
| 2162.17948 | 0.99016 | 2162.17948 | 0.98485 | 2162.17948 | 0.96794 | 2162.17948 | 0.99792 |
| 2160.75041 | 0.9896  | 2160.75041 | 0.98439 | 2160.75041 | 0.9671  | 2160.75041 | 0.99782 |
| 2159.32134 | 0.9891  | 2159.32134 | 0.98389 | 2159.32134 | 0.96628 | 2159.32134 | 0.99773 |
| 2157.89227 | 0.98863 | 2157.89227 | 0.98334 | 2157.89227 | 0.96547 | 2157.89227 | 0.99768 |
| 2156.46321 | 0.98821 | 2156.46321 | 0.98277 | 2156.46321 | 0.96471 | 2156.46321 | 0.99764 |
| 2155.03414 | 0.98783 | 2155.03414 | 0.98223 | 2155.03414 | 0.96402 | 2155.03414 | 0.99762 |
| 2153.60507 | 0.98751 | 2153.60507 | 0.98175 | 2153.60507 | 0.9634  | 2153.60507 | 0.9976  |
| 2152.176   | 0.98722 | 2152.176   | 0.98137 | 2152.176   | 0.96279 | 2152.176   | 0.99759 |
| 2150.74694 | 0.98697 | 2150.74694 | 0.98108 | 2150.74694 | 0.96222 | 2150.74694 | 0.99761 |
| 2149.31787 | 0.98672 | 2149.31787 | 0.98086 | 2149.31787 | 0.96167 | 2149.31787 | 0.99763 |



|            |         |            |         |            |         |            |         |
|------------|---------|------------|---------|------------|---------|------------|---------|
| 2147.8888  | 0.98646 | 2147.8888  | 0.98068 | 2147.8888  | 0.96113 | 2147.8888  | 0.99763 |
| 2146.45973 | 0.98622 | 2146.45973 | 0.98054 | 2146.45973 | 0.96058 | 2146.45973 | 0.9976  |
| 2145.03066 | 0.98601 | 2145.03066 | 0.98043 | 2145.03066 | 0.96004 | 2145.03066 | 0.99755 |
| 2143.6016  | 0.98583 | 2143.6016  | 0.9803  | 2143.6016  | 0.95955 | 2143.6016  | 0.99752 |
| 2142.17253 | 0.98569 | 2142.17253 | 0.98012 | 2142.17253 | 0.95911 | 2142.17253 | 0.99754 |
| 2140.74346 | 0.98561 | 2140.74346 | 0.97989 | 2140.74346 | 0.95874 | 2140.74346 | 0.99762 |
| 2139.31439 | 0.98557 | 2139.31439 | 0.97962 | 2139.31439 | 0.95843 | 2139.31439 | 0.99772 |
| 2137.88533 | 0.9856  | 2137.88533 | 0.97936 | 2137.88533 | 0.95823 | 2137.88533 | 0.99779 |
| 2136.45626 | 0.9857  | 2136.45626 | 0.97916 | 2136.45626 | 0.95815 | 2136.45626 | 0.99784 |
| 2135.02719 | 0.98588 | 2135.02719 | 0.97901 | 2135.02719 | 0.95813 | 2135.02719 | 0.99788 |
| 2133.59812 | 0.98611 | 2133.59812 | 0.97888 | 2133.59812 | 0.95814 | 2133.59812 | 0.99794 |
| 2132.16905 | 0.98635 | 2132.16905 | 0.97877 | 2132.16905 | 0.95818 | 2132.16905 | 0.99801 |
| 2130.73999 | 0.98664 | 2130.73999 | 0.97875 | 2130.73999 | 0.95828 | 2130.73999 | 0.99807 |
| 2129.31092 | 0.98697 | 2129.31092 | 0.97885 | 2129.31092 | 0.95846 | 2129.31092 | 0.99813 |
| 2127.88185 | 0.98733 | 2127.88185 | 0.97905 | 2127.88185 | 0.95872 | 2127.88185 | 0.99823 |
| 2126.45278 | 0.98772 | 2126.45278 | 0.97931 | 2126.45278 | 0.95903 | 2126.45278 | 0.99836 |
| 2125.02372 | 0.98814 | 2125.02372 | 0.9796  | 2125.02372 | 0.95938 | 2125.02372 | 0.99847 |
| 2123.59465 | 0.9886  | 2123.59465 | 0.97989 | 2123.59465 | 0.95975 | 2123.59465 | 0.99857 |
| 2122.16558 | 0.98908 | 2122.16558 | 0.98017 | 2122.16558 | 0.96013 | 2122.16558 | 0.99866 |
| 2120.73651 | 0.98958 | 2120.73651 | 0.9804  | 2120.73651 | 0.96057 | 2120.73651 | 0.99877 |
| 2119.30744 | 0.99008 | 2119.30744 | 0.98055 | 2119.30744 | 0.96106 | 2119.30744 | 0.99888 |
| 2117.87838 | 0.9906  | 2117.87838 | 0.98063 | 2117.87838 | 0.96157 | 2117.87838 | 0.99895 |
| 2116.44931 | 0.99117 | 2116.44931 | 0.9807  | 2116.44931 | 0.9621  | 2116.44931 | 0.99897 |
| 2115.02024 | 0.99178 | 2115.02024 | 0.98083 | 2115.02024 | 0.96265 | 2115.02024 | 0.99899 |
| 2113.59117 | 0.9924  | 2113.59117 | 0.98101 | 2113.59117 | 0.96324 | 2113.59117 | 0.99906 |
| 2112.16211 | 0.99296 | 2112.16211 | 0.98117 | 2112.16211 | 0.96379 | 2112.16211 | 0.99919 |
| 2110.73304 | 0.99346 | 2110.73304 | 0.98131 | 2110.73304 | 0.96429 | 2110.73304 | 0.99932 |
| 2109.30397 | 0.99396 | 2109.30397 | 0.9815  | 2109.30397 | 0.96478 | 2109.30397 | 0.99941 |
| 2107.8749  | 0.99448 | 2107.8749  | 0.9818  | 2107.8749  | 0.96532 | 2107.8749  | 0.99946 |
| 2106.44584 | 0.99501 | 2106.44584 | 0.98218 | 2106.44584 | 0.9659  | 2106.44584 | 0.99951 |
| 2105.01677 | 0.99552 | 2105.01677 | 0.98259 | 2105.01677 | 0.96649 | 2105.01677 | 0.99957 |
| 2103.5877  | 0.99599 | 2103.5877  | 0.98299 | 2103.5877  | 0.9671  | 2103.5877  | 0.99961 |
| 2102.15863 | 0.99645 | 2102.15863 | 0.98336 | 2102.15863 | 0.96774 | 2102.15863 | 0.99964 |
| 2100.72956 | 0.99689 | 2100.72956 | 0.98371 | 2100.72956 | 0.96841 | 2100.72956 | 0.99968 |
| 2099.3005  | 0.9973  | 2099.3005  | 0.98402 | 2099.3005  | 0.96909 | 2099.3005  | 0.99974 |
| 2097.87143 | 0.99768 | 2097.87143 | 0.98428 | 2097.87143 | 0.96975 | 2097.87143 | 0.9998  |
| 2096.44236 | 0.99801 | 2096.44236 | 0.98449 | 2096.44236 | 0.97038 | 2096.44236 | 0.99987 |
| 2095.01329 | 0.99829 | 2095.01329 | 0.98461 | 2095.01329 | 0.97099 | 2095.01329 | 0.99992 |
| 2093.58423 | 0.99852 | 2093.58423 | 0.98462 | 2093.58423 | 0.97156 | 2093.58423 | 0.99995 |
| 2092.15516 | 0.99875 | 2092.15516 | 0.98462 | 2092.15516 | 0.9721  | 2092.15516 | 0.99992 |
| 2090.72609 | 0.99901 | 2090.72609 | 0.98478 | 2090.72609 | 0.97264 | 2090.72609 | 0.99981 |
| 2089.29702 | 0.99931 | 2089.29702 | 0.98512 | 2089.29702 | 0.97321 | 2089.29702 | 0.9997  |
| 2087.86795 | 0.99955 | 2087.86795 | 0.98548 | 2087.86795 | 0.97385 | 2087.86795 | 0.9997  |
| 2086.43889 | 0.9997  | 2086.43889 | 0.98573 | 2086.43889 | 0.97453 | 2086.43889 | 0.99981 |
| 2085.00982 | 0.99978 | 2085.00982 | 0.98591 | 2085.00982 | 0.97516 | 2085.00982 | 0.99994 |
| 2083.58075 | 0.99986 | 2083.58075 | 0.98611 | 2083.58075 | 0.97568 | 2083.58075 | 1       |
| 2082.15168 | 0.99993 | 2082.15168 | 0.98634 | 2082.15168 | 0.97613 | 2082.15168 | 1.00002 |
| 2080.72262 | 0.99998 | 2080.72262 | 0.98652 | 2080.72262 | 0.9766  | 2080.72262 | 1.00003 |
| 2079.29355 | 1       | 2079.29355 | 0.98665 | 2079.29355 | 0.97714 | 2079.29355 | 1.00002 |
| 2077.86448 | 1.00001 | 2077.86448 | 0.98673 | 2077.86448 | 0.97769 | 2077.86448 | 0.99999 |
| 2076.43541 | 1       | 2076.43541 | 0.98674 | 2076.43541 | 0.97822 | 2076.43541 | 0.99997 |
| 2075.00635 | 0.99999 | 2075.00635 | 0.98669 | 2075.00635 | 0.97873 | 2075.00635 | 0.99999 |
| 2073.57728 | 1       | 2073.57728 | 0.98659 | 2073.57728 | 0.97927 | 2073.57728 | 1.00005 |
| 2072.14821 | 1.00003 | 2072.14821 | 0.98646 | 2072.14821 | 0.97983 | 2072.14821 | 1.00012 |

|            |         |            |         |            |         |            |         |
|------------|---------|------------|---------|------------|---------|------------|---------|
| 2070.71914 | 1.00004 | 2070.71914 | 0.98625 | 2070.71914 | 0.9804  | 2070.71914 | 1.00017 |
| 2069.29007 | 0.99999 | 2069.29007 | 0.98587 | 2069.29007 | 0.98095 | 2069.29007 | 1.0002  |
| 2067.86101 | 0.99986 | 2067.86101 | 0.98542 | 2067.86101 | 0.98145 | 2067.86101 | 1.00019 |
| 2066.43194 | 0.9998  | 2066.43194 | 0.98524 | 2066.43194 | 0.98193 | 2066.43194 | 0.99999 |
| 2065.00287 | 0.99992 | 2065.00287 | 0.98559 | 2065.00287 | 0.98252 | 2065.00287 | 0.99967 |
| 2063.5738  | 1.00008 | 2063.5738  | 0.98615 | 2063.5738  | 0.98319 | 2063.5738  | 0.99948 |
| 2062.14474 | 1.00006 | 2062.14474 | 0.98642 | 2062.14474 | 0.98383 | 2062.14474 | 0.99956 |
| 2060.71567 | 1.00004 | 2060.71567 | 0.98639 | 2060.71567 | 0.98434 | 2060.71567 | 0.99979 |
| 2059.2866  | 1       | 2059.2866  | 0.98634 | 2059.2866  | 0.9848  | 2059.2866  | 0.99997 |
| 2057.85753 | 0.99998 | 2057.85753 | 0.98635 | 2057.85753 | 0.98529 | 2057.85753 | 1.00004 |
| 2056.42846 | 0.99996 | 2056.42846 | 0.98634 | 2056.42846 | 0.98577 | 2056.42846 | 1.00007 |
| 2054.9994  | 0.99992 | 2054.9994  | 0.98627 | 2054.9994  | 0.98622 | 2054.9994  | 1.00006 |
| 2053.57033 | 0.99988 | 2053.57033 | 0.98619 | 2053.57033 | 0.98663 | 2053.57033 | 1.00002 |
| 2052.14126 | 0.99986 | 2052.14126 | 0.98609 | 2052.14126 | 0.98707 | 2052.14126 | 0.99999 |
| 2050.71219 | 0.99982 | 2050.71219 | 0.98597 | 2050.71219 | 0.98753 | 2050.71219 | 1       |
| 2049.28313 | 0.99975 | 2049.28313 | 0.98583 | 2049.28313 | 0.98797 | 2049.28313 | 1.00001 |
| 2047.85406 | 0.99965 | 2047.85406 | 0.98569 | 2047.85406 | 0.98839 | 2047.85406 | 1       |
| 2046.42499 | 0.99968 | 2046.42499 | 0.98556 | 2046.42499 | 0.98879 | 2046.42499 | 0.99997 |
| 2044.99592 | 0.99965 | 2044.99592 | 0.98543 | 2044.99592 | 0.98916 | 2044.99592 | 0.99991 |
| 2043.56686 | 0.99959 | 2043.56686 | 0.98542 | 2043.56686 | 0.98948 | 2043.56686 | 0.9998  |
| 2042.13779 | 0.9996  | 2042.13779 | 0.98577 | 2042.13779 | 0.98983 | 2042.13779 | 0.99962 |
| 2040.70872 | 0.99973 | 2040.70872 | 0.98644 | 2040.70872 | 0.99032 | 2040.70872 | 0.99944 |
| 2039.27965 | 0.99984 | 2039.27965 | 0.98706 | 2039.27965 | 0.99092 | 2039.27965 | 0.99944 |
| 2037.85058 | 0.99985 | 2037.85058 | 0.98736 | 2037.85058 | 0.9915  | 2037.85058 | 0.99964 |
| 2036.42152 | 0.9998  | 2036.42152 | 0.98748 | 2036.42152 | 0.99199 | 2036.42152 | 0.99989 |
| 2034.99245 | 0.9998  | 2034.99245 | 0.98765 | 2034.99245 | 0.99243 | 2034.99245 | 1.00005 |
| 2033.56338 | 0.99986 | 2033.56338 | 0.98787 | 2033.56338 | 0.9929  | 2033.56338 | 1.00013 |
| 2032.13431 | 0.99992 | 2032.13431 | 0.98806 | 2032.13431 | 0.99341 | 2032.13431 | 1.00016 |
| 2030.70525 | 0.99995 | 2030.70525 | 0.98818 | 2030.70525 | 0.99391 | 2030.70525 | 1.00017 |
| 2029.27618 | 0.99995 | 2029.27618 | 0.98827 | 2029.27618 | 0.99439 | 2029.27618 | 1.00015 |
| 2027.84711 | 0.99996 | 2027.84711 | 0.98838 | 2027.84711 | 0.99485 | 2027.84711 | 1.00011 |
| 2026.41804 | 1       | 2026.41804 | 0.98854 | 2026.41804 | 0.99533 | 2026.41804 | 1.00008 |
| 2024.98897 | 1.00003 | 2024.98897 | 0.98877 | 2024.98897 | 0.99584 | 2024.98897 | 1.00011 |
| 2023.55991 | 1.00002 | 2023.55991 | 0.98905 | 2023.55991 | 0.99633 | 2023.55991 | 1.00019 |
| 2022.13084 | 0.99991 | 2022.13084 | 0.98922 | 2022.13084 | 0.99673 | 2022.13084 | 1.00033 |
| 2020.70177 | 0.99968 | 2020.70177 | 0.98917 | 2020.70177 | 0.99696 | 2020.70177 | 1.00045 |
| 2019.2727  | 0.99949 | 2019.2727  | 0.98927 | 2019.2727  | 0.99704 | 2019.2727  | 1.00041 |
| 2017.84364 | 0.99958 | 2017.84364 | 0.99014 | 2017.84364 | 0.99721 | 2017.84364 | 1.00001 |
| 2016.41457 | 0.99996 | 2016.41457 | 0.9917  | 2016.41457 | 0.99774 | 2016.41457 | 0.99953 |
| 2014.9855  | 1.00023 | 2014.9855  | 0.99297 | 2014.9855  | 0.99849 | 2014.9855  | 0.99942 |
| 2013.55643 | 1.00031 | 2013.55643 | 0.99329 | 2013.55643 | 0.99914 | 2013.55643 | 0.99976 |
| 2012.12737 | 1.00021 | 2012.12737 | 0.993   | 2012.12737 | 0.9995  | 2012.12737 | 1.00019 |
| 2010.6983  | 1.00012 | 2010.6983  | 0.99274 | 2010.6983  | 0.99967 | 2010.6983  | 1.00041 |
| 2009.26923 | 1.00014 | 2009.26923 | 0.99271 | 2009.26923 | 0.99977 | 2009.26923 | 1.00043 |
| 2007.84016 | 1.00018 | 2007.84016 | 0.99279 | 2007.84016 | 0.99986 | 2007.84016 | 1.00038 |
| 2006.41109 | 1.00019 | 2006.41109 | 0.99286 | 2006.41109 | 0.99995 | 2006.41109 | 1.00031 |
| 2004.98203 | 1.00014 | 2004.98203 | 0.99287 | 2004.98203 | 1       | 2004.98203 | 1.0004  |
| 2003.55296 | 1.00004 | 2003.55296 | 0.99285 | 2003.55296 | 1.00001 | 2003.55296 | 1.00047 |
| 2002.12389 | 0.99989 | 2002.12389 | 0.99287 | 2002.12389 | 0.99997 | 2002.12389 | 1.00049 |
| 2000.69482 | 0.99974 | 2000.69482 | 0.993   | 2000.69482 | 0.9999  | 2000.69482 | 1.00045 |
| 1999.26576 | 0.99962 | 1999.26576 | 0.99329 | 1999.26576 | 0.99984 | 1999.26576 | 1.00035 |
| 1997.83669 | 0.99947 | 1997.83669 | 0.99357 | 1997.83669 | 0.99979 | 1997.83669 | 1.0003  |
| 1996.40762 | 0.99909 | 1996.40762 | 0.99331 | 1996.40762 | 0.9996  | 1996.40762 | 1.00045 |
| 1994.97855 | 0.99846 | 1994.97855 | 0.99249 | 1994.97855 | 0.9991  | 1994.97855 | 1.00061 |

|            |         |            |         |            |         |            |         |
|------------|---------|------------|---------|------------|---------|------------|---------|
| 1993.54948 | 0.99803 | 1993.54948 | 0.99221 | 1993.54948 | 0.99847 | 1993.54948 | 1.00028 |
| 1992.12042 | 0.99825 | 1992.12042 | 0.9934  | 1992.12042 | 0.99821 | 1992.12042 | 0.99935 |
| 1990.69135 | 0.99881 | 1990.69135 | 0.99524 | 1990.69135 | 0.99852 | 1990.69135 | 0.99849 |
| 1989.26228 | 0.99914 | 1989.26228 | 0.99617 | 1989.26228 | 0.999   | 1989.26228 | 0.99838 |
| 1987.83321 | 0.99922 | 1987.83321 | 0.99596 | 1987.83321 | 0.99927 | 1987.83321 | 0.99883 |
| 1986.40415 | 0.9992  | 1986.40415 | 0.99541 | 1986.40415 | 0.99929 | 1986.40415 | 0.99931 |
| 1984.97508 | 0.99917 | 1984.97508 | 0.9949  | 1984.97508 | 0.99934 | 1984.97508 | 0.99963 |
| 1983.54601 | 0.99916 | 1983.54601 | 0.99446 | 1983.54601 | 0.99925 | 1983.54601 | 0.99983 |
| 1982.11694 | 0.99918 | 1982.11694 | 0.99421 | 1982.11694 | 0.99928 | 1982.11694 | 0.99992 |
| 1980.68788 | 0.99926 | 1980.68788 | 0.99421 | 1980.68788 | 0.99932 | 1980.68788 | 0.99997 |
| 1979.25881 | 0.99936 | 1979.25881 | 0.99435 | 1979.25881 | 0.99941 | 1979.25881 | 1       |
| 1977.82974 | 0.99945 | 1977.82974 | 0.9946  | 1977.82974 | 0.99952 | 1977.82974 | 1.00003 |
| 1976.40067 | 0.99954 | 1976.40067 | 0.99492 | 1976.40067 | 0.9996  | 1976.40067 | 1       |
| 1974.9716  | 0.99962 | 1974.9716  | 0.99526 | 1974.9716  | 0.99966 | 1974.9716  | 0.99994 |
| 1973.54254 | 0.99966 | 1973.54254 | 0.99551 | 1973.54254 | 0.99973 | 1973.54254 | 0.99988 |
| 1972.11347 | 0.99955 | 1972.11347 | 0.99536 | 1972.11347 | 0.99975 | 1972.11347 | 0.99991 |
| 1970.6844  | 0.9992  | 1970.6844  | 0.99461 | 1970.6844  | 0.99962 | 1970.6844  | 1.00001 |
| 1969.25533 | 0.99884 | 1969.25533 | 0.99388 | 1969.25533 | 0.9992  | 1969.25533 | 0.99985 |
| 1967.82627 | 0.99892 | 1967.82627 | 0.99422 | 1967.82627 | 0.99887 | 1967.82627 | 0.99917 |
| 1966.3972  | 0.99949 | 1966.3972  | 0.99562 | 1966.3972  | 0.99903 | 1966.3972  | 0.99837 |
| 1964.96813 | 0.99995 | 1964.96813 | 0.99662 | 1964.96813 | 0.99952 | 1964.96813 | 0.99816 |
| 1963.53906 | 1       | 1963.53906 | 0.99632 | 1963.53906 | 0.99983 | 1963.53906 | 0.99863 |
| 1962.10999 | 0.99982 | 1962.10999 | 0.99546 | 1962.10999 | 0.99981 | 1962.10999 | 0.99917 |
| 1960.68093 | 0.99975 | 1960.68093 | 0.99502 | 1960.68093 | 0.9997  | 1960.68093 | 0.99935 |
| 1959.25186 | 0.99983 | 1959.25186 | 0.99506 | 1959.25186 | 0.99972 | 1959.25186 | 0.99931 |
| 1957.82279 | 0.9999  | 1957.82279 | 0.99521 | 1957.82279 | 0.99981 | 1957.82279 | 0.99927 |
| 1956.39372 | 0.99997 | 1956.39372 | 0.9955  | 1956.39372 | 0.99988 | 1956.39372 | 0.99922 |
| 1954.96466 | 1.00008 | 1954.96466 | 0.99607 | 1954.96466 | 0.99993 | 1954.96466 | 0.99914 |
| 1953.53559 | 1.00021 | 1953.53559 | 0.99672 | 1953.53559 | 0.99998 | 1953.53559 | 0.9991  |
| 1952.10652 | 1.00021 | 1952.10652 | 0.99711 | 1952.10652 | 1       | 1952.10652 | 0.99919 |
| 1950.67745 | 1.00005 | 1950.67745 | 0.99709 | 1950.67745 | 1       | 1950.67745 | 0.99931 |
| 1949.24838 | 0.99975 | 1949.24838 | 0.99677 | 1949.24838 | 0.99987 | 1949.24838 | 0.99936 |
| 1947.81932 | 0.99932 | 1947.81932 | 0.99613 | 1947.81932 | 0.99956 | 1947.81932 | 0.99932 |
| 1946.39025 | 0.99869 | 1946.39025 | 0.99501 | 1946.39025 | 0.99897 | 1946.39025 | 0.99922 |
| 1944.96118 | 0.99806 | 1944.96118 | 0.99396 | 1944.96118 | 0.99816 | 1944.96118 | 0.99879 |
| 1943.53211 | 0.99807 | 1943.53211 | 0.99456 | 1943.53211 | 0.99765 | 1943.53211 | 0.99763 |
| 1942.10305 | 0.99892 | 1942.10305 | 0.99724 | 1942.10305 | 0.99802 | 1942.10305 | 0.99614 |
| 1940.67398 | 0.99971 | 1940.67398 | 0.99971 | 1940.67398 | 0.99897 | 1940.67398 | 0.99565 |
| 1939.24491 | 0.99951 | 1939.24491 | 0.99985 | 1939.24491 | 0.99957 | 1939.24491 | 0.99662 |
| 1937.81584 | 0.99858 | 1937.81584 | 0.99849 | 1937.81584 | 0.99954 | 1937.81584 | 0.99804 |
| 1936.38678 | 0.99769 | 1936.38678 | 0.99748 | 1936.38678 | 0.99925 | 1936.38678 | 0.99887 |
| 1934.95771 | 0.99712 | 1934.95771 | 0.99735 | 1934.95771 | 0.999   | 1934.95771 | 0.99907 |
| 1933.52864 | 0.9967  | 1933.52864 | 0.99767 | 1933.52864 | 0.99876 | 1933.52864 | 0.99905 |
| 1932.09957 | 0.9963  | 1932.09957 | 0.99806 | 1932.09957 | 0.99845 | 1932.09957 | 0.99907 |
| 1930.6705  | 0.99586 | 1930.6705  | 0.99832 | 1930.6705  | 0.9981  | 1930.6705  | 0.99919 |
| 1929.24144 | 0.99534 | 1929.24144 | 0.99831 | 1929.24144 | 0.99774 | 1929.24144 | 0.99941 |
| 1927.81237 | 0.99462 | 1927.81237 | 0.99769 | 1927.81237 | 0.99727 | 1927.81237 | 0.99972 |
| 1926.3833  | 0.99357 | 1926.3833  | 0.99619 | 1926.3833  | 0.99647 | 1926.3833  | 1       |
| 1924.95423 | 0.99255 | 1924.95423 | 0.99478 | 1924.95423 | 0.9954  | 1924.95423 | 0.99974 |
| 1923.52517 | 0.99213 | 1923.52517 | 0.99486 | 1923.52517 | 0.99461 | 1923.52517 | 0.99871 |
| 1922.0961  | 0.99208 | 1922.0961  | 0.99566 | 1922.0961  | 0.99439 | 1922.0961  | 0.99783 |
| 1920.66703 | 0.99162 | 1920.66703 | 0.99536 | 1920.66703 | 0.99424 | 1920.66703 | 0.99788 |
| 1919.23796 | 0.99103 | 1919.23796 | 0.99493 | 1919.23796 | 0.99387 | 1919.23796 | 0.99793 |
| 1917.80889 | 0.99127 | 1917.80889 | 0.99672 | 1917.80889 | 0.99387 | 1917.80889 | 0.99705 |

|            |         |            |         |            |         |            |         |
|------------|---------|------------|---------|------------|---------|------------|---------|
| 1916.37983 | 0.99198 | 1916.37983 | 0.99954 | 1916.37983 | 0.99448 | 1916.37983 | 0.99633 |
| 1914.95076 | 0.99177 | 1914.95076 | 1       | 1914.95076 | 0.99491 | 1914.95076 | 0.99719 |
| 1913.52169 | 0.99043 | 1913.52169 | 0.99803 | 1913.52169 | 0.99448 | 1913.52169 | 0.99897 |
| 1912.09262 | 0.98898 | 1912.09262 | 0.99595 | 1912.09262 | 0.99352 | 1912.09262 | 1.00003 |
| 1910.66356 | 0.98828 | 1910.66356 | 0.99561 | 1910.66356 | 0.99273 | 1910.66356 | 0.99978 |
| 1909.23449 | 0.98837 | 1909.23449 | 0.99689 | 1909.23449 | 0.99252 | 1909.23449 | 0.99893 |
| 1907.80542 | 0.98868 | 1907.80542 | 0.99836 | 1907.80542 | 0.99276 | 1907.80542 | 0.99847 |
| 1906.37635 | 0.98866 | 1906.37635 | 0.99879 | 1906.37635 | 0.993   | 1906.37635 | 0.99877 |
| 1904.94729 | 0.98825 | 1904.94729 | 0.99817 | 1904.94729 | 0.99298 | 1904.94729 | 0.99951 |
| 1903.51822 | 0.98779 | 1903.51822 | 0.99732 | 1903.51822 | 0.9928  | 1903.51822 | 1.00011 |
| 1902.08915 | 0.98749 | 1902.08915 | 0.99678 | 1902.08915 | 0.99263 | 1902.08915 | 1.00039 |
| 1900.66008 | 0.98725 | 1900.66008 | 0.99629 | 1900.66008 | 0.99247 | 1900.66008 | 1.00051 |
| 1899.23101 | 0.98689 | 1899.23101 | 0.99544 | 1899.23101 | 0.99219 | 1899.23101 | 1.00061 |
| 1897.80195 | 0.98646 | 1897.80195 | 0.99447 | 1897.80195 | 0.99176 | 1897.80195 | 1.00054 |
| 1896.37288 | 0.98635 | 1896.37288 | 0.9943  | 1896.37288 | 0.99143 | 1896.37288 | 1       |
| 1894.94381 | 0.98665 | 1894.94381 | 0.99507 | 1894.94381 | 0.99147 | 1894.94381 | 0.99927 |
| 1893.51474 | 0.98673 | 1893.51474 | 0.99524 | 1893.51474 | 0.99154 | 1893.51474 | 0.9991  |
| 1892.08568 | 0.98626 | 1892.08568 | 0.99408 | 1892.08568 | 0.99113 | 1892.08568 | 0.99937 |
| 1890.65661 | 0.98608 | 1890.65661 | 0.9937  | 1890.65661 | 0.9906  | 1890.65661 | 0.99893 |
| 1889.22754 | 0.98702 | 1889.22754 | 0.99583 | 1889.22754 | 0.99088 | 1889.22754 | 0.99756 |
| 1887.79847 | 0.98826 | 1887.79847 | 0.9983  | 1887.79847 | 0.99192 | 1887.79847 | 0.99675 |
| 1886.3694  | 0.98861 | 1886.3694  | 0.99837 | 1886.3694  | 0.99269 | 1886.3694  | 0.99738 |
| 1884.94034 | 0.9883  | 1884.94034 | 0.99683 | 1884.94034 | 0.99285 | 1884.94034 | 0.99851 |
| 1883.51127 | 0.98816 | 1883.51127 | 0.99557 | 1883.51127 | 0.99287 | 1883.51127 | 0.99913 |
| 1882.0822  | 0.98834 | 1882.0822  | 0.99487 | 1882.0822  | 0.99302 | 1882.0822  | 0.99928 |
| 1880.65313 | 0.98857 | 1880.65313 | 0.99425 | 1880.65313 | 0.99322 | 1880.65313 | 0.99933 |
| 1879.22407 | 0.98884 | 1879.22407 | 0.9937  | 1879.22407 | 0.99344 | 1879.22407 | 0.99933 |
| 1877.795   | 0.98917 | 1877.795   | 0.99333 | 1877.795   | 0.99366 | 1877.795   | 0.99929 |
| 1876.36593 | 0.98951 | 1876.36593 | 0.99303 | 1876.36593 | 0.99388 | 1876.36593 | 0.99925 |
| 1874.93686 | 0.98965 | 1874.93686 | 0.99233 | 1874.93686 | 0.99397 | 1874.93686 | 0.99934 |
| 1873.5078  | 0.98916 | 1873.5078  | 0.99019 | 1873.5078  | 0.99357 | 1873.5078  | 0.99976 |
| 1872.07873 | 0.988   | 1872.07873 | 0.98655 | 1872.07873 | 0.99228 | 1872.07873 | 1       |
| 1870.64966 | 0.98735 | 1870.64966 | 0.98421 | 1870.64966 | 0.99054 | 1870.64966 | 0.99888 |
| 1869.22059 | 0.98897 | 1869.22059 | 0.987   | 1869.22059 | 0.98997 | 1869.22059 | 0.99534 |
| 1867.79152 | 0.99257 | 1867.79152 | 0.99388 | 1867.79152 | 0.99174 | 1867.79152 | 0.99166 |
| 1866.36246 | 0.99532 | 1866.36246 | 0.99836 | 1866.36246 | 0.99459 | 1866.36246 | 0.99117 |
| 1864.93339 | 0.9957  | 1864.93339 | 0.99803 | 1864.93339 | 0.99648 | 1864.93339 | 0.99385 |
| 1863.50432 | 0.99483 | 1863.50432 | 0.99504 | 1863.50432 | 0.99701 | 1863.50432 | 0.99707 |
| 1862.07525 | 0.99414 | 1862.07525 | 0.99261 | 1862.07525 | 0.99693 | 1862.07525 | 0.99898 |
| 1860.64619 | 0.99413 | 1860.64619 | 0.99164 | 1860.64619 | 0.99688 | 1860.64619 | 0.99958 |
| 1859.21712 | 0.99454 | 1859.21712 | 0.9916  | 1859.21712 | 0.9971  | 1859.21712 | 0.99961 |
| 1857.78805 | 0.99506 | 1857.78805 | 0.99186 | 1857.78805 | 0.99757 | 1857.78805 | 0.99962 |
| 1856.35898 | 0.99545 | 1856.35898 | 0.99203 | 1856.35898 | 0.9981  | 1856.35898 | 0.9998  |
| 1854.92991 | 0.99567 | 1854.92991 | 0.99201 | 1854.92991 | 0.99847 | 1854.92991 | 1.00009 |
| 1853.50085 | 0.99576 | 1853.50085 | 0.99187 | 1853.50085 | 0.99865 | 1853.50085 | 1.00035 |
| 1852.07178 | 0.9957  | 1852.07178 | 0.99143 | 1852.07178 | 0.99868 | 1852.07178 | 1.00056 |
| 1850.64271 | 0.99542 | 1850.64271 | 0.99049 | 1850.64271 | 0.99839 | 1850.64271 | 1.00066 |
| 1849.21364 | 0.99481 | 1849.21364 | 0.9888  | 1849.21364 | 0.99767 | 1849.21364 | 1.00073 |
| 1847.78458 | 0.9938  | 1847.78458 | 0.9862  | 1847.78458 | 0.99642 | 1847.78458 | 1.00079 |
| 1846.35551 | 0.99305 | 1846.35551 | 0.98437 | 1846.35551 | 0.99493 | 1846.35551 | 0.99995 |
| 1844.92644 | 0.9943  | 1844.92644 | 0.98734 | 1844.92644 | 0.99452 | 1844.92644 | 0.99674 |
| 1843.49737 | 0.99767 | 1843.49737 | 0.99506 | 1843.49737 | 0.99632 | 1843.49737 | 0.99251 |
| 1842.06831 | 1       | 1842.06831 | 1       | 1842.06831 | 0.99888 | 1842.06831 | 0.99139 |
| 1840.63924 | 0.99995 | 1840.63924 | 0.99849 | 1840.63924 | 1       | 1840.63924 | 0.99415 |

|            |         |            |         |            |         |            |         |
|------------|---------|------------|---------|------------|---------|------------|---------|
| 1839.21017 | 0.99848 | 1839.21017 | 0.99422 | 1839.21017 | 0.99985 | 1839.21017 | 0.99755 |
| 1837.7811  | 0.99767 | 1837.7811  | 0.99186 | 1837.7811  | 0.99944 | 1837.7811  | 0.99913 |
| 1836.35203 | 0.99783 | 1836.35203 | 0.9919  | 1836.35203 | 0.99949 | 1836.35203 | 0.99924 |
| 1834.92297 | 0.99773 | 1834.92297 | 0.99145 | 1834.92297 | 0.99952 | 1834.92297 | 0.99959 |
| 1833.4939  | 0.9965  | 1833.4939  | 0.98854 | 1833.4939  | 0.99859 | 1833.4939  | 1.00056 |
| 1832.06483 | 0.995   | 1832.06483 | 0.98534 | 1832.06483 | 0.99665 | 1832.06483 | 1.0005  |
| 1830.63576 | 0.99516 | 1830.63576 | 0.98632 | 1830.63576 | 0.99515 | 1830.63576 | 0.99783 |
| 1829.2067  | 0.99715 | 1829.2067  | 0.99146 | 1829.2067  | 0.99542 | 1829.2067  | 0.9942  |
| 1827.77763 | 0.99861 | 1827.77763 | 0.99497 | 1827.77763 | 0.99659 | 1827.77763 | 0.99288 |
| 1826.34856 | 0.99866 | 1826.34856 | 0.99509 | 1826.34856 | 0.99724 | 1826.34856 | 0.99371 |
| 1824.91949 | 0.99886 | 1824.91949 | 0.99562 | 1824.91949 | 0.99775 | 1824.91949 | 0.99427 |
| 1823.49042 | 0.99973 | 1823.49042 | 0.99739 | 1823.49042 | 0.99883 | 1823.49042 | 0.99445 |
| 1822.06136 | 1       | 1822.06136 | 0.99735 | 1822.06136 | 0.99984 | 1822.06136 | 0.99573 |
| 1820.63229 | 0.99969 | 1820.63229 | 0.99487 | 1820.63229 | 1       | 1820.63229 | 0.99777 |
| 1819.20322 | 0.99934 | 1819.20322 | 0.99241 | 1819.20322 | 0.99983 | 1819.20322 | 0.999   |
| 1817.77415 | 0.99961 | 1817.77415 | 0.99144 | 1817.77415 | 0.99968 | 1817.77415 | 0.99926 |
| 1816.34509 | 1.0001  | 1816.34509 | 0.99101 | 1816.34509 | 0.99971 | 1816.34509 | 0.99915 |
| 1814.91602 | 1.00009 | 1814.91602 | 0.98953 | 1814.91602 | 0.99942 | 1814.91602 | 0.99936 |
| 1813.48695 | 0.99955 | 1813.48695 | 0.98718 | 1813.48695 | 0.99849 | 1813.48695 | 0.99949 |
| 1812.05788 | 0.99931 | 1812.05788 | 0.98602 | 1812.05788 | 0.99729 | 1812.05788 | 0.99872 |
| 1810.62882 | 0.99994 | 1810.62882 | 0.98729 | 1810.62882 | 0.99652 | 1810.62882 | 0.99699 |
| 1809.19975 | 1.00071 | 1809.19975 | 0.98911 | 1809.19975 | 0.99623 | 1809.19975 | 0.99563 |
| 1807.77068 | 1.00047 | 1807.77068 | 0.98883 | 1807.77068 | 0.99567 | 1807.77068 | 0.99561 |
| 1806.34161 | 0.99894 | 1806.34161 | 0.98584 | 1806.34161 | 0.99414 | 1806.34161 | 0.99643 |
| 1804.91254 | 0.99649 | 1804.91254 | 0.98109 | 1804.91254 | 0.9914  | 1804.91254 | 0.99706 |
| 1803.48348 | 0.99383 | 1803.48348 | 0.97625 | 1803.48348 | 0.98764 | 1803.48348 | 0.9965  |
| 1802.05441 | 0.99191 | 1802.05441 | 0.97355 | 1802.05441 | 0.98364 | 1802.05441 | 0.99417 |
| 1800.62534 | 0.99132 | 1800.62534 | 0.97398 | 1800.62534 | 0.98061 | 1800.62534 | 0.99074 |
| 1799.19627 | 0.99133 | 1799.19627 | 0.97531 | 1799.19627 | 0.97904 | 1799.19627 | 0.98822 |
| 1797.76721 | 0.99056 | 1797.76721 | 0.97408 | 1797.76721 | 0.97804 | 1797.76721 | 0.98818 |
| 1796.33814 | 0.98853 | 1796.33814 | 0.9694  | 1796.33814 | 0.97653 | 1796.33814 | 0.99016 |
| 1794.90907 | 0.98634 | 1794.90907 | 0.96417 | 1794.90907 | 0.97448 | 1794.90907 | 0.99181 |
| 1793.48    | 0.98642 | 1793.48    | 0.9642  | 1793.48    | 0.97339 | 1793.48    | 0.99048 |
| 1792.05093 | 0.99043 | 1792.05093 | 0.97299 | 1792.05093 | 0.97543 | 1792.05093 | 0.98635 |
| 1790.62187 | 0.99572 | 1790.62187 | 0.98387 | 1790.62187 | 0.98028 | 1790.62187 | 0.98416 |
| 1789.1928  | 0.99817 | 1789.1928  | 0.9876  | 1789.1928  | 0.98473 | 1789.1928  | 0.98715 |
| 1787.76373 | 0.99788 | 1787.76373 | 0.98521 | 1787.76373 | 0.98713 | 1787.76373 | 0.99263 |
| 1786.33466 | 0.99739 | 1786.33466 | 0.98294 | 1786.33466 | 0.98838 | 1786.33466 | 0.99655 |
| 1784.9056  | 0.99807 | 1784.9056  | 0.98377 | 1784.9056  | 0.98964 | 1784.9056  | 0.99772 |
| 1783.47653 | 0.99922 | 1783.47653 | 0.98586 | 1783.47653 | 0.99091 | 1783.47653 | 0.9976  |
| 1782.04746 | 1.00002 | 1782.04746 | 0.98743 | 1782.04746 | 0.99176 | 1782.04746 | 0.99738 |
| 1780.61839 | 1.00075 | 1780.61839 | 0.9893  | 1780.61839 | 0.99241 | 1780.61839 | 0.99699 |
| 1779.18932 | 1.00135 | 1779.18932 | 0.99111 | 1779.18932 | 0.993   | 1779.18932 | 0.99684 |
| 1777.76026 | 1.00074 | 1777.76026 | 0.99016 | 1777.76026 | 0.99286 | 1777.76026 | 0.99787 |
| 1776.33119 | 0.9984  | 1776.33119 | 0.98533 | 1776.33119 | 0.99119 | 1776.33119 | 0.99985 |
| 1774.90212 | 0.99557 | 1774.90212 | 0.97978 | 1774.90212 | 0.98822 | 1774.90212 | 1.00059 |
| 1773.47305 | 0.99467 | 1773.47305 | 0.97961 | 1773.47305 | 0.98555 | 1773.47305 | 0.99775 |
| 1772.04399 | 0.99695 | 1772.04399 | 0.98759 | 1772.04399 | 0.98522 | 1772.04399 | 0.99175 |
| 1770.61492 | 0.9997  | 1770.61492 | 0.99668 | 1770.61492 | 0.9869  | 1770.61492 | 0.98783 |
| 1769.18585 | 1       | 1769.18585 | 1       | 1769.18585 | 0.98823 | 1769.18585 | 0.98862 |
| 1767.75678 | 0.99959 | 1767.75678 | 0.99927 | 1767.75678 | 0.98835 | 1767.75678 | 0.99175 |
| 1766.32772 | 0.99819 | 1766.32772 | 0.99628 | 1766.32772 | 0.98741 | 1766.32772 | 0.99523 |
| 1764.89865 | 0.99588 | 1764.89865 | 0.99105 | 1764.89865 | 0.98517 | 1764.89865 | 0.99854 |
| 1763.46958 | 0.9936  | 1763.46958 | 0.98656 | 1763.46958 | 0.98192 | 1763.46958 | 1       |

|            |         |            |         |            |         |            |         |
|------------|---------|------------|---------|------------|---------|------------|---------|
| 1762.04051 | 0.99298 | 1762.04051 | 0.9871  | 1762.04051 | 0.97906 | 1762.04051 | 0.99857 |
| 1760.61144 | 0.99346 | 1760.61144 | 0.99044 | 1760.61144 | 0.97726 | 1760.61144 | 0.99635 |
| 1759.18238 | 0.99284 | 1759.18238 | 0.99092 | 1759.18238 | 0.97537 | 1759.18238 | 0.99634 |
| 1757.75331 | 0.99119 | 1757.75331 | 0.98942 | 1757.75331 | 0.97277 | 1757.75331 | 0.99732 |
| 1756.32424 | 0.98963 | 1756.32424 | 0.98866 | 1756.32424 | 0.97014 | 1756.32424 | 0.99771 |
| 1754.89517 | 0.98746 | 1754.89517 | 0.98616 | 1754.89517 | 0.96727 | 1754.89517 | 0.99871 |
| 1753.46611 | 0.98385 | 1753.46611 | 0.98007 | 1753.46611 | 0.96303 | 1753.46611 | 1.00043 |
| 1752.03704 | 0.98017 | 1752.03704 | 0.9748  | 1752.03704 | 0.95743 | 1752.03704 | 0.99967 |
| 1750.60797 | 0.97864 | 1750.60797 | 0.97626 | 1750.60797 | 0.95213 | 1750.60797 | 0.99451 |
| 1749.1789  | 0.979   | 1749.1789  | 0.98296 | 1749.1789  | 0.94855 | 1749.1789  | 0.98855 |
| 1747.74983 | 0.97849 | 1747.74983 | 0.98725 | 1747.74983 | 0.94585 | 1747.74983 | 0.98656 |
| 1746.32077 | 0.97589 | 1746.32077 | 0.98631 | 1746.32077 | 0.94251 | 1746.32077 | 0.98832 |
| 1744.8917  | 0.97198 | 1744.8917  | 0.98259 | 1744.8917  | 0.93813 | 1744.8917  | 0.99102 |
| 1743.46263 | 0.96774 | 1743.46263 | 0.97842 | 1743.46263 | 0.933   | 1743.46263 | 0.99295 |
| 1742.03356 | 0.96382 | 1742.03356 | 0.9756  | 1742.03356 | 0.92745 | 1742.03356 | 0.99325 |
| 1740.6045  | 0.96061 | 1740.6045  | 0.97565 | 1740.6045  | 0.92191 | 1740.6045  | 0.99151 |
| 1739.17543 | 0.95741 | 1739.17543 | 0.9761  | 1739.17543 | 0.91655 | 1739.17543 | 0.98973 |
| 1737.74636 | 0.95268 | 1737.74636 | 0.97135 | 1737.74636 | 0.91065 | 1737.74636 | 0.99083 |
| 1736.31729 | 0.9465  | 1736.31729 | 0.96249 | 1736.31729 | 0.90318 | 1736.31729 | 0.99289 |
| 1734.88823 | 0.94181 | 1734.88823 | 0.95987 | 1734.88823 | 0.89465 | 1734.88823 | 0.98952 |
| 1733.45916 | 0.94122 | 1733.45916 | 0.97029 | 1733.45916 | 0.88794 | 1733.45916 | 0.9798  |
| 1732.03009 | 0.94137 | 1732.03009 | 0.98059 | 1732.03009 | 0.8842  | 1732.03009 | 0.97378 |
| 1730.60102 | 0.93855 | 1730.60102 | 0.98028 | 1730.60102 | 0.88075 | 1730.60102 | 0.97583 |
| 1729.17195 | 0.93411 | 1729.17195 | 0.97519 | 1729.17195 | 0.87646 | 1729.17195 | 0.98051 |
| 1727.74289 | 0.92972 | 1727.74289 | 0.9702  | 1727.74289 | 0.87189 | 1727.74289 | 0.98405 |
| 1726.31382 | 0.92553 | 1726.31382 | 0.96535 | 1726.31382 | 0.86719 | 1726.31382 | 0.98608 |
| 1724.88475 | 0.92159 | 1724.88475 | 0.96112 | 1724.88475 | 0.86235 | 1724.88475 | 0.98647 |
| 1723.45568 | 0.91791 | 1723.45568 | 0.9576  | 1723.45568 | 0.85774 | 1723.45568 | 0.98569 |
| 1722.02662 | 0.91364 | 1722.02662 | 0.95189 | 1722.02662 | 0.85312 | 1722.02662 | 0.98551 |
| 1720.59755 | 0.90824 | 1720.59755 | 0.94278 | 1720.59755 | 0.84763 | 1720.59755 | 0.9856  |
| 1719.16848 | 0.90305 | 1719.16848 | 0.93558 | 1719.16848 | 0.84126 | 1719.16848 | 0.98196 |
| 1717.73941 | 0.9007  | 1717.73941 | 0.93905 | 1717.73941 | 0.83604 | 1717.73941 | 0.97154 |
| 1716.31034 | 0.90112 | 1716.31034 | 0.95178 | 1716.31034 | 0.83415 | 1716.31034 | 0.95964 |
| 1714.88128 | 0.89998 | 1714.88128 | 0.95927 | 1714.88128 | 0.83395 | 1714.88128 | 0.95495 |
| 1713.45221 | 0.89549 | 1713.45221 | 0.95657 | 1713.45221 | 0.83257 | 1713.45221 | 0.95732 |
| 1712.02314 | 0.88912 | 1712.02314 | 0.94879 | 1712.02314 | 0.8294  | 1712.02314 | 0.96158 |
| 1710.59407 | 0.88207 | 1710.59407 | 0.93967 | 1710.59407 | 0.82484 | 1710.59407 | 0.96465 |
| 1709.16501 | 0.87474 | 1709.16501 | 0.93058 | 1709.16501 | 0.81924 | 1709.16501 | 0.96562 |
| 1707.73594 | 0.8675  | 1707.73594 | 0.92353 | 1707.73594 | 0.81301 | 1707.73594 | 0.96354 |
| 1706.30687 | 0.86078 | 1706.30687 | 0.92055 | 1706.30687 | 0.80696 | 1706.30687 | 0.95827 |
| 1704.8778  | 0.85406 | 1704.8778  | 0.91849 | 1704.8778  | 0.80161 | 1704.8778  | 0.95334 |
| 1703.44874 | 0.84636 | 1703.44874 | 0.91169 | 1703.44874 | 0.79616 | 1703.44874 | 0.95196 |
| 1702.01967 | 0.83789 | 1702.01967 | 0.90256 | 1702.01967 | 0.78966 | 1702.01967 | 0.95033 |
| 1700.5906  | 0.83029 | 1700.5906  | 0.90016 | 1700.5906  | 0.78277 | 1700.5906  | 0.94191 |
| 1699.16153 | 0.82466 | 1699.16153 | 0.90521 | 1699.16153 | 0.77727 | 1699.16153 | 0.92964 |
| 1697.73246 | 0.81953 | 1697.73246 | 0.9075  | 1697.73246 | 0.77305 | 1697.73246 | 0.92269 |
| 1696.3034  | 0.81386 | 1696.3034  | 0.90642 | 1696.3034  | 0.76908 | 1696.3034  | 0.92003 |
| 1694.87433 | 0.80811 | 1694.87433 | 0.90496 | 1694.87433 | 0.76557 | 1694.87433 | 0.91791 |
| 1693.44526 | 0.80198 | 1693.44526 | 0.89862 | 1693.44526 | 0.76195 | 1693.44526 | 0.91829 |
| 1692.01619 | 0.79499 | 1692.01619 | 0.88647 | 1692.01619 | 0.75699 | 1692.01619 | 0.92095 |
| 1690.58713 | 0.78789 | 1690.58713 | 0.87367 | 1690.58713 | 0.75074 | 1690.58713 | 0.92175 |
| 1689.15806 | 0.78155 | 1689.15806 | 0.86277 | 1689.15806 | 0.74434 | 1689.15806 | 0.91953 |
| 1687.72899 | 0.77573 | 1687.72899 | 0.85128 | 1687.72899 | 0.73819 | 1687.72899 | 0.91695 |
| 1686.29992 | 0.77071 | 1686.29992 | 0.83964 | 1686.29992 | 0.73187 | 1686.29992 | 0.91277 |

|            |         |            |         |            |         |            |         |
|------------|---------|------------|---------|------------|---------|------------|---------|
| 1684.87085 | 0.76973 | 1684.87085 | 0.8365  | 1684.87085 | 0.72671 | 1684.87085 | 0.90084 |
| 1683.44179 | 0.77478 | 1683.44179 | 0.84483 | 1683.44179 | 0.72583 | 1683.44179 | 0.88407 |
| 1682.01272 | 0.77993 | 1682.01272 | 0.84803 | 1682.01272 | 0.72767 | 1682.01272 | 0.87624 |
| 1680.58365 | 0.78182 | 1680.58365 | 0.83901 | 1680.58365 | 0.7283  | 1680.58365 | 0.87859 |
| 1679.15458 | 0.78268 | 1679.15458 | 0.82474 | 1679.15458 | 0.72729 | 1679.15458 | 0.88331 |
| 1677.72552 | 0.78492 | 1677.72552 | 0.8113  | 1677.72552 | 0.72565 | 1677.72552 | 0.88515 |
| 1676.29645 | 0.79094 | 1676.29645 | 0.80247 | 1676.29645 | 0.72469 | 1676.29645 | 0.88169 |
| 1674.86738 | 0.80121 | 1674.86738 | 0.79854 | 1674.86738 | 0.7253  | 1674.86738 | 0.87424 |
| 1673.43831 | 0.81172 | 1673.43831 | 0.79427 | 1673.43831 | 0.72639 | 1673.43831 | 0.86815 |
| 1672.00925 | 0.82003 | 1672.00925 | 0.78677 | 1672.00925 | 0.72632 | 1672.00925 | 0.86529 |
| 1670.58018 | 0.82991 | 1670.58018 | 0.78111 | 1670.58018 | 0.72605 | 1670.58018 | 0.86159 |
| 1669.15111 | 0.84429 | 1669.15111 | 0.78171 | 1669.15111 | 0.72778 | 1669.15111 | 0.85533 |
| 1667.72204 | 0.85771 | 1667.72204 | 0.782   | 1667.72204 | 0.73055 | 1667.72204 | 0.85175 |
| 1666.29297 | 0.86525 | 1666.29297 | 0.77532 | 1666.29297 | 0.73143 | 1666.29297 | 0.85356 |
| 1664.86391 | 0.86998 | 1664.86391 | 0.76568 | 1664.86391 | 0.7301  | 1664.86391 | 0.85614 |
| 1663.43484 | 0.877   | 1663.43484 | 0.76033 | 1663.43484 | 0.72849 | 1663.43484 | 0.85461 |
| 1662.00577 | 0.88735 | 1662.00577 | 0.76101 | 1662.00577 | 0.72834 | 1662.00577 | 0.84987 |
| 1660.5767  | 0.89671 | 1660.5767  | 0.76148 | 1660.5767  | 0.72903 | 1660.5767  | 0.84705 |
| 1659.14764 | 0.90186 | 1659.14764 | 0.75656 | 1659.14764 | 0.72859 | 1659.14764 | 0.84819 |
| 1657.71857 | 0.9032  | 1657.71857 | 0.74639 | 1657.71857 | 0.72609 | 1657.71857 | 0.8516  |
| 1656.2895  | 0.90231 | 1656.2895  | 0.7336  | 1656.2895  | 0.72156 | 1656.2895  | 0.85454 |
| 1654.86043 | 0.90344 | 1654.86043 | 0.7258  | 1654.86043 | 0.71635 | 1654.86043 | 0.85176 |
| 1653.43136 | 0.91515 | 1653.43136 | 0.73756 | 1653.43136 | 0.71539 | 1653.43136 | 0.83751 |
| 1652.0023  | 0.9324  | 1652.0023  | 0.75925 | 1652.0023  | 0.72084 | 1652.0023  | 0.8227  |
| 1650.57323 | 0.93772 | 1650.57323 | 0.76094 | 1650.57323 | 0.72407 | 1650.57323 | 0.82258 |
| 1649.14416 | 0.93493 | 1649.14416 | 0.7499  | 1649.14416 | 0.72271 | 1649.14416 | 0.82922 |
| 1647.71509 | 0.93441 | 1647.71509 | 0.74459 | 1647.71509 | 0.72107 | 1647.71509 | 0.83133 |
| 1646.28603 | 0.94062 | 1646.28603 | 0.75249 | 1646.28603 | 0.72351 | 1646.28603 | 0.82726 |
| 1644.85696 | 0.94726 | 1644.85696 | 0.76114 | 1644.85696 | 0.72856 | 1644.85696 | 0.82523 |
| 1643.42789 | 0.94865 | 1643.42789 | 0.76014 | 1643.42789 | 0.73176 | 1643.42789 | 0.82919 |
| 1641.99882 | 0.94688 | 1641.99882 | 0.75387 | 1641.99882 | 0.73259 | 1641.99882 | 0.83499 |
| 1640.56976 | 0.94445 | 1640.56976 | 0.7469  | 1640.56976 | 0.73213 | 1640.56976 | 0.83931 |
| 1639.14069 | 0.942   | 1639.14069 | 0.7403  | 1639.14069 | 0.73081 | 1639.14069 | 0.84144 |
| 1637.71162 | 0.94089 | 1637.71162 | 0.73705 | 1637.71162 | 0.7293  | 1637.71162 | 0.84015 |
| 1636.28255 | 0.9447  | 1636.28255 | 0.74452 | 1636.28255 | 0.73023 | 1636.28255 | 0.83363 |
| 1634.85348 | 0.95307 | 1634.85348 | 0.76094 | 1634.85348 | 0.73543 | 1634.85348 | 0.82612 |
| 1633.42442 | 0.95789 | 1633.42442 | 0.76924 | 1633.42442 | 0.74084 | 1633.42442 | 0.82595 |
| 1631.99535 | 0.95686 | 1631.99535 | 0.76561 | 1631.99535 | 0.74315 | 1631.99535 | 0.83223 |
| 1630.56628 | 0.95411 | 1630.56628 | 0.75881 | 1630.56628 | 0.74353 | 1630.56628 | 0.83851 |
| 1629.13721 | 0.95306 | 1629.13721 | 0.75552 | 1629.13721 | 0.74406 | 1629.13721 | 0.84108 |
| 1627.70815 | 0.95423 | 1627.70815 | 0.7561  | 1627.70815 | 0.74565 | 1627.70815 | 0.84074 |
| 1626.27908 | 0.95594 | 1626.27908 | 0.75691 | 1626.27908 | 0.74768 | 1626.27908 | 0.84002 |
| 1624.85001 | 0.95787 | 1624.85001 | 0.7575  | 1624.85001 | 0.74975 | 1624.85001 | 0.83897 |
| 1623.42094 | 0.96135 | 1623.42094 | 0.76057 | 1623.42094 | 0.75287 | 1623.42094 | 0.83648 |
| 1621.99187 | 0.96521 | 1621.99187 | 0.76366 | 1621.99187 | 0.7569  | 1621.99187 | 0.83459 |
| 1620.56281 | 0.96626 | 1620.56281 | 0.76099 | 1620.56281 | 0.75958 | 1620.56281 | 0.83591 |
| 1619.13374 | 0.96502 | 1619.13374 | 0.7541  | 1619.13374 | 0.76017 | 1619.13374 | 0.83802 |
| 1617.70467 | 0.96607 | 1617.70467 | 0.75142 | 1617.70467 | 0.76113 | 1617.70467 | 0.83553 |
| 1616.2756  | 0.97221 | 1616.2756  | 0.75751 | 1616.2756  | 0.76533 | 1616.2756  | 0.82766 |
| 1614.84654 | 0.9785  | 1614.84654 | 0.76323 | 1614.84654 | 0.77108 | 1614.84654 | 0.82158 |
| 1613.41747 | 0.98036 | 1613.41747 | 0.76078 | 1613.41747 | 0.77476 | 1613.41747 | 0.82084 |
| 1611.9884  | 0.97983 | 1611.9884  | 0.75415 | 1611.9884  | 0.7764  | 1611.9884  | 0.82137 |
| 1610.55933 | 0.98009 | 1610.55933 | 0.74891 | 1610.55933 | 0.77777 | 1610.55933 | 0.81937 |
| 1609.13026 | 0.9822  | 1609.13026 | 0.74671 | 1609.13026 | 0.77997 | 1609.13026 | 0.81468 |

|            |         |            |         |            |         |            |         |
|------------|---------|------------|---------|------------|---------|------------|---------|
| 1607.7012  | 0.9852  | 1607.7012  | 0.74597 | 1607.7012  | 0.7828  | 1607.7012  | 0.80906 |
| 1606.27213 | 0.98783 | 1606.27213 | 0.74477 | 1606.27213 | 0.7854  | 1606.27213 | 0.8036  |
| 1604.84306 | 0.98983 | 1604.84306 | 0.74288 | 1604.84306 | 0.78723 | 1604.84306 | 0.79796 |
| 1603.41399 | 0.9917  | 1603.41399 | 0.74135 | 1603.41399 | 0.78844 | 1603.41399 | 0.79137 |
| 1601.98493 | 0.99371 | 1601.98493 | 0.74076 | 1601.98493 | 0.78939 | 1601.98493 | 0.78372 |
| 1600.55586 | 0.99553 | 1600.55586 | 0.74057 | 1600.55586 | 0.79015 | 1600.55586 | 0.77549 |
| 1599.12679 | 0.99674 | 1599.12679 | 0.74012 | 1599.12679 | 0.7904  | 1599.12679 | 0.7669  |
| 1597.69772 | 0.99743 | 1597.69772 | 0.7397  | 1597.69772 | 0.78991 | 1597.69772 | 0.75756 |
| 1596.26866 | 0.99808 | 1596.26866 | 0.74027 | 1596.26866 | 0.78887 | 1596.26866 | 0.74697 |
| 1594.83959 | 0.99894 | 1594.83959 | 0.74229 | 1594.83959 | 0.78769 | 1594.83959 | 0.7352  |
| 1593.41052 | 0.9997  | 1593.41052 | 0.74519 | 1593.41052 | 0.78649 | 1593.41052 | 0.72297 |
| 1591.98145 | 1       | 1591.98145 | 0.74823 | 1591.98145 | 0.78508 | 1591.98145 | 0.71083 |
| 1590.55238 | 0.99994 | 1590.55238 | 0.75149 | 1590.55238 | 0.78326 | 1590.55238 | 0.69867 |
| 1589.12332 | 0.99961 | 1589.12332 | 0.75531 | 1589.12332 | 0.78103 | 1589.12332 | 0.68636 |
| 1587.69425 | 0.99904 | 1587.69425 | 0.75964 | 1587.69425 | 0.77848 | 1587.69425 | 0.6741  |
| 1586.26518 | 0.99816 | 1586.26518 | 0.76423 | 1586.26518 | 0.77569 | 1586.26518 | 0.66209 |
| 1584.83611 | 0.99701 | 1584.83611 | 0.76918 | 1584.83611 | 0.77267 | 1584.83611 | 0.65043 |
| 1583.40705 | 0.99566 | 1583.40705 | 0.77458 | 1583.40705 | 0.76944 | 1583.40705 | 0.63929 |
| 1581.97798 | 0.99384 | 1581.97798 | 0.77949 | 1581.97798 | 0.76583 | 1581.97798 | 0.62919 |
| 1580.54891 | 0.99084 | 1580.54891 | 0.78197 | 1580.54891 | 0.76145 | 1580.54891 | 0.62093 |
| 1579.11984 | 0.98673 | 1579.11984 | 0.78236 | 1579.11984 | 0.75605 | 1579.11984 | 0.61416 |
| 1577.69077 | 0.98367 | 1577.69077 | 0.78685 | 1577.69077 | 0.75034 | 1577.69077 | 0.60639 |
| 1576.26171 | 0.98434 | 1576.26171 | 0.80243 | 1576.26171 | 0.74632 | 1576.26171 | 0.5963  |
| 1574.83264 | 0.98619 | 1574.83264 | 0.82028 | 1574.83264 | 0.7447  | 1574.83264 | 0.58878 |
| 1573.40357 | 0.98408 | 1573.40357 | 0.82579 | 1573.40357 | 0.74276 | 1573.40357 | 0.58808 |
| 1571.9745  | 0.97885 | 1571.9745  | 0.82323 | 1571.9745  | 0.73887 | 1571.9745  | 0.59088 |
| 1570.54544 | 0.9747  | 1570.54544 | 0.82532 | 1570.54544 | 0.73422 | 1570.54544 | 0.59266 |
| 1569.11637 | 0.97383 | 1569.11637 | 0.83666 | 1569.11637 | 0.73101 | 1569.11637 | 0.59327 |
| 1567.6873  | 0.97354 | 1567.6873  | 0.84785 | 1567.6873  | 0.72934 | 1567.6873  | 0.59614 |
| 1566.25823 | 0.97111 | 1566.25823 | 0.852   | 1566.25823 | 0.72741 | 1566.25823 | 0.60246 |
| 1564.82917 | 0.96702 | 1564.82917 | 0.85146 | 1564.82917 | 0.72453 | 1564.82917 | 0.61084 |
| 1563.4001  | 0.96163 | 1563.4001  | 0.84682 | 1563.4001  | 0.72069 | 1563.4001  | 0.6202  |
| 1561.97103 | 0.95471 | 1561.97103 | 0.8375  | 1561.97103 | 0.71539 | 1561.97103 | 0.62942 |
| 1560.54196 | 0.94858 | 1560.54196 | 0.83171 | 1560.54196 | 0.70867 | 1560.54196 | 0.63601 |
| 1559.11289 | 0.95007 | 1559.11289 | 0.84986 | 1559.11289 | 0.70404 | 1559.11289 | 0.63872 |
| 1557.68383 | 0.95784 | 1557.68383 | 0.88442 | 1557.68383 | 0.70572 | 1557.68383 | 0.64449 |
| 1556.25476 | 0.95878 | 1556.25476 | 0.89682 | 1556.25476 | 0.70822 | 1556.25476 | 0.65849 |
| 1554.82569 | 0.95375 | 1554.82569 | 0.89325 | 1554.82569 | 0.70796 | 1554.82569 | 0.67579 |
| 1553.39662 | 0.94782 | 1553.39662 | 0.88883 | 1553.39662 | 0.70631 | 1553.39662 | 0.69235 |
| 1551.96756 | 0.94256 | 1551.96756 | 0.88698 | 1551.96756 | 0.70432 | 1551.96756 | 0.70721 |
| 1550.53849 | 0.93789 | 1550.53849 | 0.88722 | 1550.53849 | 0.70231 | 1550.53849 | 0.72079 |
| 1549.10942 | 0.93334 | 1549.10942 | 0.88807 | 1549.10942 | 0.70035 | 1549.10942 | 0.73384 |
| 1547.68035 | 0.92819 | 1547.68035 | 0.88655 | 1547.68035 | 0.69804 | 1547.68035 | 0.74641 |
| 1546.25128 | 0.92222 | 1546.25128 | 0.88208 | 1546.25128 | 0.69483 | 1546.25128 | 0.75759 |
| 1544.82222 | 0.91608 | 1544.82222 | 0.87771 | 1544.82222 | 0.69083 | 1544.82222 | 0.76646 |
| 1543.39315 | 0.91069 | 1543.39315 | 0.87613 | 1543.39315 | 0.68681 | 1543.39315 | 0.7729  |
| 1541.96408 | 0.90715 | 1541.96408 | 0.88072 | 1541.96408 | 0.68387 | 1541.96408 | 0.77673 |
| 1540.53501 | 0.90718 | 1540.53501 | 0.89964 | 1540.53501 | 0.68456 | 1540.53501 | 0.77817 |
| 1539.10595 | 0.90834 | 1539.10595 | 0.92382 | 1539.10595 | 0.68955 | 1539.10595 | 0.78258 |
| 1537.67688 | 0.90474 | 1537.67688 | 0.9291  | 1537.67688 | 0.69322 | 1537.67688 | 0.79419 |
| 1536.24781 | 0.89693 | 1536.24781 | 0.91948 | 1536.24781 | 0.69298 | 1536.24781 | 0.8082  |
| 1534.81874 | 0.88855 | 1534.81874 | 0.91121 | 1534.81874 | 0.69095 | 1534.81874 | 0.81873 |
| 1533.38968 | 0.8821  | 1533.38968 | 0.91371 | 1533.38968 | 0.69    | 1533.38968 | 0.82417 |
| 1531.96061 | 0.87686 | 1531.96061 | 0.92098 | 1531.96061 | 0.69076 | 1531.96061 | 0.8283  |



|            |         |            |         |            |         |            |         |
|------------|---------|------------|---------|------------|---------|------------|---------|
| 1530.53154 | 0.87019 | 1530.53154 | 0.92131 | 1530.53154 | 0.69089 | 1530.53154 | 0.8346  |
| 1529.10247 | 0.86177 | 1529.10247 | 0.91579 | 1529.10247 | 0.68914 | 1529.10247 | 0.84124 |
| 1527.6734  | 0.85291 | 1527.6734  | 0.91217 | 1527.6734  | 0.68646 | 1527.6734  | 0.84506 |
| 1526.24434 | 0.84441 | 1526.24434 | 0.91271 | 1526.24434 | 0.68399 | 1526.24434 | 0.84611 |
| 1524.81527 | 0.83598 | 1524.81527 | 0.91292 | 1524.81527 | 0.68163 | 1524.81527 | 0.84674 |
| 1523.3862  | 0.82718 | 1523.3862  | 0.91238 | 1523.3862  | 0.67877 | 1523.3862  | 0.84676 |
| 1521.95713 | 0.8184  | 1521.95713 | 0.91716 | 1521.95713 | 0.67612 | 1521.95713 | 0.84415 |
| 1520.52807 | 0.81012 | 1520.52807 | 0.92626 | 1520.52807 | 0.67473 | 1520.52807 | 0.8407  |
| 1519.099   | 0.80164 | 1519.099   | 0.9309  | 1519.099   | 0.67358 | 1519.099   | 0.8401  |
| 1517.66993 | 0.79238 | 1517.66993 | 0.93119 | 1517.66993 | 0.67165 | 1517.66993 | 0.84141 |
| 1516.24086 | 0.78295 | 1516.24086 | 0.93197 | 1516.24086 | 0.66959 | 1516.24086 | 0.84252 |
| 1514.81179 | 0.77384 | 1514.81179 | 0.93179 | 1514.81179 | 0.66769 | 1514.81179 | 0.84402 |
| 1513.38273 | 0.76462 | 1513.38273 | 0.92722 | 1513.38273 | 0.665   | 1513.38273 | 0.84626 |
| 1511.95366 | 0.75492 | 1511.95366 | 0.91859 | 1511.95366 | 0.66077 | 1511.95366 | 0.84789 |
| 1510.52459 | 0.74498 | 1510.52459 | 0.90791 | 1510.52459 | 0.65503 | 1510.52459 | 0.84765 |
| 1509.09552 | 0.73533 | 1509.09552 | 0.89945 | 1509.09552 | 0.64831 | 1509.09552 | 0.84372 |
| 1507.66646 | 0.72725 | 1507.66646 | 0.90506 | 1507.66646 | 0.64273 | 1507.66646 | 0.83243 |
| 1506.23739 | 0.72152 | 1506.23739 | 0.92859 | 1506.23739 | 0.64202 | 1506.23739 | 0.81669 |
| 1504.80832 | 0.7151  | 1504.80832 | 0.94132 | 1504.80832 | 0.64371 | 1504.80832 | 0.80991 |
| 1503.37925 | 0.70617 | 1503.37925 | 0.93361 | 1503.37925 | 0.6427  | 1503.37925 | 0.8132  |
| 1501.95019 | 0.69574 | 1501.95019 | 0.91901 | 1501.95019 | 0.63881 | 1501.95019 | 0.81759 |
| 1500.52112 | 0.68472 | 1500.52112 | 0.90665 | 1500.52112 | 0.63326 | 1500.52112 | 0.81752 |
| 1499.09205 | 0.67359 | 1499.09205 | 0.90059 | 1499.09205 | 0.62708 | 1499.09205 | 0.81146 |
| 1497.66298 | 0.66242 | 1497.66298 | 0.90228 | 1497.66298 | 0.6213  | 1497.66298 | 0.80054 |
| 1496.23391 | 0.65084 | 1496.23391 | 0.90747 | 1496.23391 | 0.61641 | 1496.23391 | 0.78864 |
| 1494.80485 | 0.6388  | 1494.80485 | 0.9071  | 1494.80485 | 0.61163 | 1494.80485 | 0.78042 |
| 1493.37578 | 0.62642 | 1493.37578 | 0.89865 | 1493.37578 | 0.60578 | 1493.37578 | 0.77578 |
| 1491.94671 | 0.61312 | 1491.94671 | 0.888   | 1491.94671 | 0.59832 | 1491.94671 | 0.76992 |
| 1490.51764 | 0.59824 | 1490.51764 | 0.8831  | 1490.51764 | 0.58968 | 1490.51764 | 0.75849 |
| 1489.08858 | 0.58221 | 1489.08858 | 0.88672 | 1489.08858 | 0.58154 | 1489.08858 | 0.74288 |
| 1487.65951 | 0.56609 | 1487.65951 | 0.89143 | 1487.65951 | 0.57495 | 1487.65951 | 0.72925 |
| 1486.23044 | 0.55015 | 1486.23044 | 0.88996 | 1486.23044 | 0.5689  | 1486.23044 | 0.72023 |
| 1484.80137 | 0.53418 | 1484.80137 | 0.88338 | 1484.80137 | 0.56225 | 1484.80137 | 0.71344 |
| 1483.3723  | 0.51777 | 1483.3723  | 0.87565 | 1483.3723  | 0.55474 | 1483.3723  | 0.70598 |
| 1481.94324 | 0.50049 | 1481.94324 | 0.86919 | 1481.94324 | 0.54653 | 1481.94324 | 0.69661 |
| 1480.51417 | 0.48275 | 1480.51417 | 0.86366 | 1480.51417 | 0.53807 | 1480.51417 | 0.68609 |
| 1479.0851  | 0.46529 | 1479.0851  | 0.8573  | 1479.0851  | 0.52959 | 1479.0851  | 0.67575 |
| 1477.65603 | 0.44801 | 1477.65603 | 0.8496  | 1477.65603 | 0.52076 | 1477.65603 | 0.66551 |
| 1476.22697 | 0.43053 | 1476.22697 | 0.84205 | 1476.22697 | 0.51134 | 1476.22697 | 0.65438 |
| 1474.7979  | 0.4128  | 1474.7979  | 0.83745 | 1474.7979  | 0.50171 | 1474.7979  | 0.64154 |
| 1473.36883 | 0.39455 | 1473.36883 | 0.83877 | 1473.36883 | 0.49265 | 1473.36883 | 0.62665 |
| 1471.93976 | 0.37674 | 1471.93976 | 0.84374 | 1471.93976 | 0.48534 | 1471.93976 | 0.6121  |
| 1470.5107  | 0.36208 | 1470.5107  | 0.84351 | 1470.5107  | 0.48001 | 1470.5107  | 0.6025  |
| 1469.08163 | 0.35094 | 1469.08163 | 0.83512 | 1469.08163 | 0.47538 | 1469.08163 | 0.59806 |
| 1467.65256 | 0.34183 | 1467.65256 | 0.82393 | 1467.65256 | 0.47056 | 1467.65256 | 0.59442 |
| 1466.22349 | 0.334   | 1466.22349 | 0.81681 | 1466.22349 | 0.4659  | 1466.22349 | 0.58771 |
| 1464.79442 | 0.3277  | 1464.79442 | 0.81648 | 1464.79442 | 0.46243 | 1464.79442 | 0.57785 |
| 1463.36536 | 0.32298 | 1463.36536 | 0.817   | 1463.36536 | 0.46019 | 1463.36536 | 0.56892 |
| 1461.93629 | 0.31911 | 1461.93629 | 0.81142 | 1461.93629 | 0.45788 | 1461.93629 | 0.56376 |
| 1460.50722 | 0.3153  | 1460.50722 | 0.80084 | 1460.50722 | 0.45457 | 1460.50722 | 0.56048 |
| 1459.07815 | 0.31109 | 1459.07815 | 0.79307 | 1459.07815 | 0.45046 | 1459.07815 | 0.55473 |
| 1457.64909 | 0.30621 | 1457.64909 | 0.79889 | 1457.64909 | 0.44694 | 1457.64909 | 0.54347 |
| 1456.22002 | 0.30048 | 1456.22002 | 0.81526 | 1456.22002 | 0.4453  | 1456.22002 | 0.53127 |
| 1454.79095 | 0.2941  | 1454.79095 | 0.82241 | 1454.79095 | 0.44395 | 1454.79095 | 0.52574 |

|            |         |            |         |            |         |            |         |
|------------|---------|------------|---------|------------|---------|------------|---------|
| 1453.36188 | 0.28723 | 1453.36188 | 0.81803 | 1453.36188 | 0.44136 | 1453.36188 | 0.52556 |
| 1451.93281 | 0.27985 | 1451.93281 | 0.8105  | 1451.93281 | 0.43774 | 1451.93281 | 0.52607 |
| 1450.50375 | 0.27208 | 1450.50375 | 0.80471 | 1450.50375 | 0.43365 | 1450.50375 | 0.52496 |
| 1449.07468 | 0.26424 | 1449.07468 | 0.80246 | 1449.07468 | 0.42964 | 1449.07468 | 0.52209 |
| 1447.64561 | 0.25678 | 1447.64561 | 0.80334 | 1447.64561 | 0.42626 | 1447.64561 | 0.51855 |
| 1446.21654 | 0.25027 | 1446.21654 | 0.80431 | 1446.21654 | 0.42374 | 1446.21654 | 0.51588 |
| 1444.78748 | 0.24507 | 1444.78748 | 0.8027  | 1444.78748 | 0.42187 | 1444.78748 | 0.51472 |
| 1443.35841 | 0.24105 | 1443.35841 | 0.79898 | 1443.35841 | 0.42032 | 1443.35841 | 0.51433 |
| 1441.92934 | 0.23784 | 1441.92934 | 0.79419 | 1441.92934 | 0.41883 | 1441.92934 | 0.51396 |
| 1440.50027 | 0.23519 | 1440.50027 | 0.78805 | 1440.50027 | 0.41719 | 1440.50027 | 0.51359 |
| 1439.07121 | 0.23298 | 1439.07121 | 0.78164 | 1439.07121 | 0.41536 | 1439.07121 | 0.51269 |
| 1437.64214 | 0.2312  | 1437.64214 | 0.7792  | 1437.64214 | 0.41385 | 1437.64214 | 0.5098  |
| 1436.21307 | 0.23001 | 1436.21307 | 0.78255 | 1436.21307 | 0.41342 | 1436.21307 | 0.5053  |
| 1434.784   | 0.22932 | 1434.784   | 0.78462 | 1434.784   | 0.41366 | 1434.784   | 0.5026  |
| 1433.35493 | 0.22884 | 1433.35493 | 0.78021 | 1433.35493 | 0.41348 | 1433.35493 | 0.50284 |
| 1431.92587 | 0.22899 | 1431.92587 | 0.77325 | 1431.92587 | 0.41309 | 1431.92587 | 0.50359 |
| 1430.4968  | 0.23071 | 1430.4968  | 0.76888 | 1430.4968  | 0.41371 | 1430.4968  | 0.503   |
| 1429.06773 | 0.23433 | 1429.06773 | 0.76721 | 1429.06773 | 0.4159  | 1429.06773 | 0.50166 |
| 1427.63866 | 0.23932 | 1427.63866 | 0.76478 | 1427.63866 | 0.41891 | 1427.63866 | 0.501   |
| 1426.2096  | 0.24566 | 1426.2096  | 0.76096 | 1426.2096  | 0.42217 | 1426.2096  | 0.5009  |
| 1424.78053 | 0.25393 | 1424.78053 | 0.75792 | 1424.78053 | 0.42607 | 1424.78053 | 0.5006  |
| 1423.35146 | 0.26375 | 1423.35146 | 0.7559  | 1423.35146 | 0.43065 | 1423.35146 | 0.50025 |
| 1421.92239 | 0.27414 | 1421.92239 | 0.75377 | 1421.92239 | 0.43529 | 1421.92239 | 0.50023 |
| 1420.49332 | 0.286   | 1420.49332 | 0.75392 | 1420.49332 | 0.44029 | 1420.49332 | 0.49954 |
| 1419.06426 | 0.30143 | 1419.06426 | 0.76109 | 1419.06426 | 0.44716 | 1419.06426 | 0.4974  |
| 1417.63519 | 0.31858 | 1417.63519 | 0.77252 | 1417.63519 | 0.45546 | 1417.63519 | 0.49592 |
| 1416.20612 | 0.33297 | 1416.20612 | 0.77956 | 1416.20612 | 0.46242 | 1416.20612 | 0.49743 |
| 1414.77705 | 0.34428 | 1414.77705 | 0.78144 | 1414.77705 | 0.46717 | 1414.77705 | 0.50089 |
| 1413.34799 | 0.35444 | 1413.34799 | 0.78281 | 1413.34799 | 0.47061 | 1413.34799 | 0.50438 |
| 1411.91892 | 0.36405 | 1411.91892 | 0.78624 | 1411.91892 | 0.47329 | 1411.91892 | 0.50746 |
| 1410.48985 | 0.37256 | 1410.48985 | 0.79096 | 1410.48985 | 0.47514 | 1410.48985 | 0.51089 |
| 1409.06078 | 0.37934 | 1409.06078 | 0.79493 | 1409.06078 | 0.47596 | 1409.06078 | 0.5154  |
| 1407.63171 | 0.38447 | 1407.63171 | 0.79756 | 1407.63171 | 0.47585 | 1407.63171 | 0.52116 |
| 1406.20265 | 0.38903 | 1406.20265 | 0.80052 | 1406.20265 | 0.47561 | 1406.20265 | 0.52813 |
| 1404.77358 | 0.39429 | 1404.77358 | 0.80456 | 1404.77358 | 0.47644 | 1404.77358 | 0.53682 |
| 1403.34451 | 0.40066 | 1403.34451 | 0.8069  | 1403.34451 | 0.47886 | 1403.34451 | 0.54773 |
| 1401.91544 | 0.40873 | 1401.91544 | 0.80533 | 1401.91544 | 0.48297 | 1401.91544 | 0.56036 |
| 1400.48638 | 0.42073 | 1400.48638 | 0.80188 | 1400.48638 | 0.48992 | 1400.48638 | 0.57385 |
| 1399.05731 | 0.4389  | 1399.05731 | 0.79933 | 1399.05731 | 0.50136 | 1399.05731 | 0.58792 |
| 1397.62824 | 0.46327 | 1397.62824 | 0.79746 | 1397.62824 | 0.51746 | 1397.62824 | 0.60253 |
| 1396.19917 | 0.49351 | 1396.19917 | 0.79518 | 1396.19917 | 0.53788 | 1396.19917 | 0.6174  |
| 1394.77011 | 0.52998 | 1394.77011 | 0.79275 | 1394.77011 | 0.56273 | 1394.77011 | 0.63225 |
| 1393.34104 | 0.56918 | 1393.34104 | 0.78918 | 1393.34104 | 0.58963 | 1393.34104 | 0.64668 |
| 1391.91197 | 0.60526 | 1391.91197 | 0.78235 | 1391.91197 | 0.61422 | 1391.91197 | 0.65978 |
| 1390.4829  | 0.63759 | 1390.4829  | 0.77281 | 1390.4829  | 0.63559 | 1390.4829  | 0.67014 |
| 1389.05383 | 0.67024 | 1389.05383 | 0.76368 | 1389.05383 | 0.65635 | 1389.05383 | 0.67623 |
| 1387.62477 | 0.70566 | 1387.62477 | 0.7575  | 1387.62477 | 0.67861 | 1387.62477 | 0.67744 |
| 1386.1957  | 0.74076 | 1386.1957  | 0.75382 | 1386.1957  | 0.70114 | 1386.1957  | 0.67562 |
| 1384.76663 | 0.77157 | 1384.76663 | 0.75089 | 1384.76663 | 0.72168 | 1384.76663 | 0.67389 |
| 1383.33756 | 0.79881 | 1383.33756 | 0.74887 | 1383.33756 | 0.74039 | 1383.33756 | 0.67351 |
| 1381.9085  | 0.82498 | 1381.9085  | 0.74902 | 1381.9085  | 0.75855 | 1381.9085  | 0.67393 |
| 1380.47943 | 0.8503  | 1380.47943 | 0.75127 | 1380.47943 | 0.77619 | 1380.47943 | 0.67456 |
| 1379.05036 | 0.87311 | 1379.05036 | 0.754   | 1379.05036 | 0.79227 | 1379.05036 | 0.67552 |
| 1377.62129 | 0.89242 | 1377.62129 | 0.75624 | 1377.62129 | 0.80606 | 1377.62129 | 0.67696 |

|            |         |            |         |            |         |            |         |
|------------|---------|------------|---------|------------|---------|------------|---------|
| 1376.19222 | 0.90935 | 1376.19222 | 0.75937 | 1376.19222 | 0.81829 | 1376.19222 | 0.67867 |
| 1374.76316 | 0.92591 | 1374.76316 | 0.76556 | 1374.76316 | 0.8306  | 1374.76316 | 0.68063 |
| 1373.33409 | 0.94178 | 1373.33409 | 0.77403 | 1373.33409 | 0.84336 | 1373.33409 | 0.68361 |
| 1371.90502 | 0.95455 | 1371.90502 | 0.78116 | 1371.90502 | 0.85485 | 1371.90502 | 0.68814 |
| 1370.47595 | 0.9639  | 1370.47595 | 0.78598 | 1370.47595 | 0.86416 | 1370.47595 | 0.69345 |
| 1369.04689 | 0.97172 | 1369.04689 | 0.79061 | 1369.04689 | 0.87213 | 1369.04689 | 0.69825 |
| 1367.61782 | 0.97864 | 1367.61782 | 0.7956  | 1367.61782 | 0.87921 | 1367.61782 | 0.70212 |
| 1366.18875 | 0.98382 | 1366.18875 | 0.79945 | 1366.18875 | 0.88474 | 1366.18875 | 0.70516 |
| 1364.75968 | 0.98758 | 1364.75968 | 0.8027  | 1364.75968 | 0.88877 | 1364.75968 | 0.7068  |
| 1363.33062 | 0.99151 | 1363.33062 | 0.80834 | 1363.33062 | 0.89266 | 1363.33062 | 0.70636 |
| 1361.90155 | 0.99593 | 1361.90155 | 0.81672 | 1361.90155 | 0.89739 | 1361.90155 | 0.70465 |
| 1360.47248 | 0.99915 | 1360.47248 | 0.8239  | 1360.47248 | 0.90197 | 1360.47248 | 0.70331 |
| 1359.04341 | 1       | 1359.04341 | 0.82745 | 1359.04341 | 0.90491 | 1359.04341 | 0.70267 |
| 1357.61434 | 0.99988 | 1357.61434 | 0.8289  | 1357.61434 | 0.90603 | 1357.61434 | 0.70164 |
| 1356.18528 | 0.99918 | 1356.18528 | 0.83046 | 1356.18528 | 0.90602 | 1356.18528 | 0.6994  |
| 1354.75621 | 0.99822 | 1354.75621 | 0.83277 | 1354.75621 | 0.90526 | 1354.75621 | 0.69603 |
| 1353.32714 | 0.99663 | 1353.32714 | 0.8351  | 1353.32714 | 0.90363 | 1353.32714 | 0.69205 |
| 1351.89807 | 0.99419 | 1351.89807 | 0.83683 | 1351.89807 | 0.90095 | 1351.89807 | 0.68773 |
| 1350.46901 | 0.99089 | 1350.46901 | 0.83817 | 1350.46901 | 0.89721 | 1350.46901 | 0.68293 |
| 1349.03994 | 0.98679 | 1349.03994 | 0.83938 | 1349.03994 | 0.89255 | 1349.03994 | 0.67765 |
| 1347.61087 | 0.98187 | 1347.61087 | 0.84029 | 1347.61087 | 0.88712 | 1347.61087 | 0.67215 |
| 1346.1818  | 0.97608 | 1346.1818  | 0.84053 | 1346.1818  | 0.88091 | 1346.1818  | 0.66677 |
| 1344.75273 | 0.96931 | 1344.75273 | 0.83969 | 1344.75273 | 0.87387 | 1344.75273 | 0.66173 |
| 1343.32367 | 0.96166 | 1343.32367 | 0.83769 | 1343.32367 | 0.86604 | 1343.32367 | 0.65711 |
| 1341.8946  | 0.95344 | 1341.8946  | 0.83546 | 1341.8946  | 0.85757 | 1341.8946  | 0.6526  |
| 1340.46553 | 0.94505 | 1340.46553 | 0.83472 | 1340.46553 | 0.84883 | 1340.46553 | 0.64798 |
| 1339.03646 | 0.93677 | 1339.03646 | 0.83592 | 1339.03646 | 0.84059 | 1339.03646 | 0.64388 |
| 1337.6074  | 0.92841 | 1337.6074  | 0.83718 | 1337.6074  | 0.83322 | 1337.6074  | 0.64138 |
| 1336.17833 | 0.9195  | 1336.17833 | 0.83665 | 1336.17833 | 0.82618 | 1336.17833 | 0.64075 |
| 1334.74926 | 0.9099  | 1334.74926 | 0.83449 | 1334.74926 | 0.81885 | 1334.74926 | 0.6413  |
| 1333.32019 | 0.89973 | 1333.32019 | 0.83192 | 1333.32019 | 0.81105 | 1333.32019 | 0.64226 |
| 1331.89113 | 0.88898 | 1331.89113 | 0.82973 | 1331.89113 | 0.80278 | 1331.89113 | 0.64333 |
| 1330.46206 | 0.87749 | 1330.46206 | 0.82803 | 1330.46206 | 0.79401 | 1330.46206 | 0.64461 |
| 1329.03299 | 0.86509 | 1329.03299 | 0.82661 | 1329.03299 | 0.78471 | 1329.03299 | 0.64626 |
| 1327.60392 | 0.85152 | 1327.60392 | 0.82531 | 1327.60392 | 0.77484 | 1327.60392 | 0.64838 |
| 1326.17485 | 0.83654 | 1326.17485 | 0.82413 | 1326.17485 | 0.76428 | 1326.17485 | 0.65097 |
| 1324.74579 | 0.81987 | 1324.74579 | 0.82313 | 1324.74579 | 0.75289 | 1324.74579 | 0.65397 |
| 1323.31672 | 0.80125 | 1323.31672 | 0.82239 | 1323.31672 | 0.7405  | 1323.31672 | 0.65729 |
| 1321.88765 | 0.78043 | 1321.88765 | 0.82212 | 1321.88765 | 0.72703 | 1321.88765 | 0.66083 |
| 1320.45858 | 0.75713 | 1320.45858 | 0.82284 | 1320.45858 | 0.71242 | 1320.45858 | 0.66454 |
| 1319.02952 | 0.73131 | 1319.02952 | 0.82487 | 1319.02952 | 0.69666 | 1319.02952 | 0.66851 |
| 1317.60045 | 0.70357 | 1317.60045 | 0.82769 | 1317.60045 | 0.67993 | 1317.60045 | 0.67302 |
| 1316.17138 | 0.67494 | 1316.17138 | 0.83045 | 1316.17138 | 0.66258 | 1316.17138 | 0.67813 |
| 1314.74231 | 0.64613 | 1314.74231 | 0.83309 | 1314.74231 | 0.64479 | 1314.74231 | 0.68365 |
| 1313.31324 | 0.61759 | 1313.31324 | 0.83604 | 1313.31324 | 0.62678 | 1313.31324 | 0.68943 |
| 1311.88418 | 0.59001 | 1311.88418 | 0.83918 | 1311.88418 | 0.60909 | 1311.88418 | 0.69549 |
| 1310.45511 | 0.56403 | 1310.45511 | 0.84197 | 1310.45511 | 0.59226 | 1310.45511 | 0.70179 |
| 1309.02604 | 0.53972 | 1309.02604 | 0.8443  | 1309.02604 | 0.57644 | 1309.02604 | 0.70811 |
| 1307.59697 | 0.51683 | 1307.59697 | 0.84654 | 1307.59697 | 0.5616  | 1307.59697 | 0.71431 |
| 1306.16791 | 0.49515 | 1306.16791 | 0.84892 | 1306.16791 | 0.54772 | 1306.16791 | 0.72038 |
| 1304.73884 | 0.47446 | 1304.73884 | 0.85146 | 1304.73884 | 0.5347  | 1304.73884 | 0.7264  |
| 1303.30977 | 0.45447 | 1303.30977 | 0.85425 | 1303.30977 | 0.52236 | 1303.30977 | 0.73239 |
| 1301.8807  | 0.43495 | 1301.8807  | 0.85751 | 1301.8807  | 0.5105  | 1301.8807  | 0.73841 |
| 1300.45164 | 0.41581 | 1300.45164 | 0.86138 | 1300.45164 | 0.4989  | 1300.45164 | 0.74445 |

|            |         |            |         |            |         |            |         |
|------------|---------|------------|---------|------------|---------|------------|---------|
| 1299.02257 | 0.39703 | 1299.02257 | 0.86591 | 1299.02257 | 0.48736 | 1299.02257 | 0.75051 |
| 1297.5935  | 0.37857 | 1297.5935  | 0.87111 | 1297.5935  | 0.47577 | 1297.5935  | 0.75653 |
| 1296.16443 | 0.36041 | 1296.16443 | 0.87684 | 1296.16443 | 0.46421 | 1296.16443 | 0.76249 |
| 1294.73536 | 0.34263 | 1294.73536 | 0.88278 | 1294.73536 | 0.45284 | 1294.73536 | 0.76833 |
| 1293.3063  | 0.32533 | 1293.3063  | 0.88858 | 1293.3063  | 0.44173 | 1293.3063  | 0.77402 |
| 1291.87723 | 0.30855 | 1291.87723 | 0.89409 | 1291.87723 | 0.43083 | 1291.87723 | 0.77958 |
| 1290.44816 | 0.29235 | 1290.44816 | 0.89924 | 1290.44816 | 0.42017 | 1290.44816 | 0.78507 |
| 1289.01909 | 0.27673 | 1289.01909 | 0.90404 | 1289.01909 | 0.40985 | 1289.01909 | 0.79063 |
| 1287.59003 | 0.2617  | 1287.59003 | 0.90836 | 1287.59003 | 0.39999 | 1287.59003 | 0.79629 |
| 1286.16096 | 0.24739 | 1286.16096 | 0.91193 | 1286.16096 | 0.39068 | 1286.16096 | 0.80203 |
| 1284.73189 | 0.23387 | 1284.73189 | 0.91454 | 1284.73189 | 0.38191 | 1284.73189 | 0.80781 |
| 1283.30282 | 0.22109 | 1283.30282 | 0.91625 | 1283.30282 | 0.37362 | 1283.30282 | 0.81357 |
| 1281.87375 | 0.20899 | 1281.87375 | 0.91733 | 1281.87375 | 0.3658  | 1281.87375 | 0.81937 |
| 1280.44469 | 0.19754 | 1280.44469 | 0.91795 | 1280.44469 | 0.35846 | 1280.44469 | 0.82526 |
| 1279.01562 | 0.18673 | 1279.01562 | 0.91809 | 1279.01562 | 0.3516  | 1279.01562 | 0.83121 |
| 1277.58655 | 0.17654 | 1277.58655 | 0.91756 | 1277.58655 | 0.34518 | 1277.58655 | 0.83712 |
| 1276.15748 | 0.16696 | 1276.15748 | 0.91623 | 1276.15748 | 0.3391  | 1276.15748 | 0.84293 |
| 1274.72842 | 0.15796 | 1274.72842 | 0.91419 | 1274.72842 | 0.33323 | 1274.72842 | 0.84863 |
| 1273.29935 | 0.1495  | 1273.29935 | 0.9118  | 1273.29935 | 0.32753 | 1273.29935 | 0.85418 |
| 1271.87028 | 0.14155 | 1271.87028 | 0.90945 | 1271.87028 | 0.32204 | 1271.87028 | 0.85955 |
| 1270.44121 | 0.13409 | 1270.44121 | 0.90727 | 1270.44121 | 0.31685 | 1270.44121 | 0.86475 |
| 1269.01215 | 0.12709 | 1269.01215 | 0.90521 | 1269.01215 | 0.31198 | 1269.01215 | 0.86974 |
| 1267.58308 | 0.12053 | 1267.58308 | 0.90325 | 1267.58308 | 0.30732 | 1267.58308 | 0.87436 |
| 1266.15401 | 0.11431 | 1266.15401 | 0.90153 | 1266.15401 | 0.30278 | 1266.15401 | 0.87851 |
| 1264.72494 | 0.10836 | 1264.72494 | 0.90019 | 1264.72494 | 0.29835 | 1264.72494 | 0.88209 |
| 1263.29587 | 0.10269 | 1263.29587 | 0.89933 | 1263.29587 | 0.29407 | 1263.29587 | 0.88509 |
| 1261.86681 | 0.09728 | 1261.86681 | 0.89909 | 1261.86681 | 0.28993 | 1261.86681 | 0.88749 |
| 1260.43774 | 0.09219 | 1260.43774 | 0.89959 | 1260.43774 | 0.28585 | 1260.43774 | 0.88933 |
| 1259.00867 | 0.08755 | 1259.00867 | 0.90066 | 1259.00867 | 0.28187 | 1259.00867 | 0.89074 |
| 1257.5796  | 0.08349 | 1257.5796  | 0.90196 | 1257.5796  | 0.27821 | 1257.5796  | 0.89176 |
| 1256.15054 | 0.08008 | 1256.15054 | 0.90335 | 1256.15054 | 0.27511 | 1256.15054 | 0.89218 |
| 1254.72147 | 0.07748 | 1254.72147 | 0.90493 | 1254.72147 | 0.27279 | 1254.72147 | 0.89177 |
| 1253.2924  | 0.07594 | 1253.2924  | 0.90675 | 1253.2924  | 0.27156 | 1253.2924  | 0.89044 |
| 1251.86333 | 0.07587 | 1251.86333 | 0.90877 | 1251.86333 | 0.27194 | 1251.86333 | 0.88823 |
| 1250.43426 | 0.07789 | 1250.43426 | 0.91092 | 1250.43426 | 0.27461 | 1250.43426 | 0.88518 |
| 1249.0052  | 0.08268 | 1249.0052  | 0.91311 | 1249.0052  | 0.28012 | 1249.0052  | 0.88135 |
| 1247.57613 | 0.09086 | 1247.57613 | 0.91532 | 1247.57613 | 0.2887  | 1247.57613 | 0.8769  |
| 1246.14706 | 0.10294 | 1246.14706 | 0.91754 | 1246.14706 | 0.30025 | 1246.14706 | 0.87198 |
| 1244.71799 | 0.11914 | 1244.71799 | 0.91971 | 1244.71799 | 0.31442 | 1244.71799 | 0.86681 |
| 1243.28893 | 0.13943 | 1243.28893 | 0.92171 | 1243.28893 | 0.33061 | 1243.28893 | 0.86167 |
| 1241.85986 | 0.1635  | 1241.85986 | 0.92338 | 1241.85986 | 0.34813 | 1241.85986 | 0.8569  |
| 1240.43079 | 0.19098 | 1240.43079 | 0.9246  | 1240.43079 | 0.36638 | 1240.43079 | 0.85287 |
| 1239.00172 | 0.22143 | 1239.00172 | 0.92535 | 1239.00172 | 0.38506 | 1239.00172 | 0.85    |
| 1237.57265 | 0.25438 | 1237.57265 | 0.92568 | 1237.57265 | 0.40408 | 1237.57265 | 0.84865 |
| 1236.14359 | 0.28934 | 1236.14359 | 0.92568 | 1236.14359 | 0.42346 | 1236.14359 | 0.84915 |
| 1234.71452 | 0.32585 | 1234.71452 | 0.92548 | 1234.71452 | 0.44319 | 1234.71452 | 0.85157 |
| 1233.28545 | 0.3635  | 1233.28545 | 0.92521 | 1233.28545 | 0.4632  | 1233.28545 | 0.85574 |
| 1231.85638 | 0.40192 | 1231.85638 | 0.92491 | 1231.85638 | 0.48353 | 1231.85638 | 0.8612  |
| 1230.42732 | 0.44076 | 1230.42732 | 0.92456 | 1230.42732 | 0.50424 | 1230.42732 | 0.86736 |
| 1228.99825 | 0.47973 | 1228.99825 | 0.92418 | 1228.99825 | 0.52547 | 1228.99825 | 0.87363 |
| 1227.56918 | 0.51854 | 1227.56918 | 0.92384 | 1227.56918 | 0.54727 | 1227.56918 | 0.87956 |
| 1226.14011 | 0.5569  | 1226.14011 | 0.9236  | 1226.14011 | 0.56962 | 1226.14011 | 0.8849  |
| 1224.71105 | 0.59447 | 1224.71105 | 0.92344 | 1224.71105 | 0.5924  | 1224.71105 | 0.88959 |
| 1223.28198 | 0.63083 | 1223.28198 | 0.9232  | 1223.28198 | 0.61549 | 1223.28198 | 0.89374 |

|            |         |            |         |            |         |            |         |
|------------|---------|------------|---------|------------|---------|------------|---------|
| 1221.85291 | 0.66568 | 1221.85291 | 0.9227  | 1221.85291 | 0.63876 | 1221.85291 | 0.89741 |
| 1220.42384 | 0.6988  | 1220.42384 | 0.92184 | 1220.42384 | 0.66213 | 1220.42384 | 0.90063 |
| 1218.99477 | 0.73004 | 1218.99477 | 0.92056 | 1218.99477 | 0.68551 | 1218.99477 | 0.90336 |
| 1217.56571 | 0.75922 | 1217.56571 | 0.91873 | 1217.56571 | 0.70881 | 1217.56571 | 0.9056  |
| 1216.13664 | 0.78617 | 1216.13664 | 0.91619 | 1216.13664 | 0.73199 | 1216.13664 | 0.90738 |
| 1214.70757 | 0.81086 | 1214.70757 | 0.91285 | 1214.70757 | 0.75506 | 1214.70757 | 0.90874 |
| 1213.2785  | 0.83331 | 1213.2785  | 0.9087  | 1213.2785  | 0.77801 | 1213.2785  | 0.90978 |
| 1211.84944 | 0.85359 | 1211.84944 | 0.90375 | 1211.84944 | 0.80067 | 1211.84944 | 0.91066 |
| 1210.42037 | 0.87182 | 1210.42037 | 0.89811 | 1210.42037 | 0.82282 | 1210.42037 | 0.91155 |
| 1208.9913  | 0.88823 | 1208.9913  | 0.89192 | 1208.9913  | 0.84435 | 1208.9913  | 0.91251 |
| 1207.56223 | 0.90312 | 1207.56223 | 0.88543 | 1207.56223 | 0.86525 | 1207.56223 | 0.9136  |
| 1206.13316 | 0.91676 | 1206.13316 | 0.87894 | 1206.13316 | 0.88535 | 1206.13316 | 0.91479 |
| 1204.7041  | 0.92928 | 1204.7041  | 0.8727  | 1204.7041  | 0.90429 | 1204.7041  | 0.91605 |
| 1203.27503 | 0.94075 | 1203.27503 | 0.86685 | 1203.27503 | 0.92171 | 1203.27503 | 0.91729 |
| 1201.84596 | 0.95118 | 1201.84596 | 0.86149 | 1201.84596 | 0.93739 | 1201.84596 | 0.91847 |
| 1200.41689 | 0.9606  | 1200.41689 | 0.8567  | 1200.41689 | 0.95129 | 1200.41689 | 0.91962 |
| 1198.98783 | 0.96904 | 1198.98783 | 0.85252 | 1198.98783 | 0.96345 | 1198.98783 | 0.92079 |
| 1197.55876 | 0.97654 | 1197.55876 | 0.84889 | 1197.55876 | 0.97388 | 1197.55876 | 0.92201 |
| 1196.12969 | 0.98302 | 1196.12969 | 0.8456  | 1196.12969 | 0.98257 | 1196.12969 | 0.92322 |
| 1194.70062 | 0.98841 | 1194.70062 | 0.84232 | 1194.70062 | 0.98949 | 1194.70062 | 0.9243  |
| 1193.27156 | 0.99268 | 1193.27156 | 0.83874 | 1193.27156 | 0.99467 | 1193.27156 | 0.92511 |
| 1191.84249 | 0.99584 | 1191.84249 | 0.83452 | 1191.84249 | 0.9981  | 1191.84249 | 0.92552 |
| 1190.41342 | 0.99793 | 1190.41342 | 0.82943 | 1190.41342 | 0.99985 | 1190.41342 | 0.9255  |
| 1188.98435 | 0.99902 | 1188.98435 | 0.82332 | 1188.98435 | 1       | 1188.98435 | 0.92509 |
| 1187.55528 | 0.99937 | 1187.55528 | 0.81618 | 1187.55528 | 0.99888 | 1187.55528 | 0.92434 |
| 1186.12622 | 0.99977 | 1186.12622 | 0.80806 | 1186.12622 | 0.99642 | 1186.12622 | 0.92333 |
| 1184.69715 | 1       | 1184.69715 | 0.79905 | 1184.69715 | 0.99282 | 1184.69715 | 0.92213 |
| 1183.26808 | 1.00009 | 1183.26808 | 0.78934 | 1183.26808 | 0.98822 | 1183.26808 | 0.92082 |
| 1181.83901 | 0.99957 | 1181.83901 | 0.77907 | 1181.83901 | 0.98276 | 1181.83901 | 0.91943 |
| 1180.40995 | 0.99853 | 1180.40995 | 0.76835 | 1180.40995 | 0.97658 | 1180.40995 | 0.91792 |
| 1178.98088 | 0.99705 | 1178.98088 | 0.75722 | 1178.98088 | 0.96979 | 1178.98088 | 0.91624 |
| 1177.55181 | 0.99518 | 1177.55181 | 0.74573 | 1177.55181 | 0.96244 | 1177.55181 | 0.91444 |
| 1176.12274 | 0.99298 | 1176.12274 | 0.734   | 1176.12274 | 0.95448 | 1176.12274 | 0.91256 |
| 1174.69367 | 0.9905  | 1174.69367 | 0.72216 | 1174.69367 | 0.94603 | 1174.69367 | 0.91064 |
| 1173.26461 | 0.9878  | 1173.26461 | 0.71036 | 1173.26461 | 0.93728 | 1173.26461 | 0.90874 |
| 1171.83554 | 0.98498 | 1171.83554 | 0.69869 | 1171.83554 | 0.92838 | 1171.83554 | 0.90684 |
| 1170.40647 | 0.98207 | 1170.40647 | 0.68733 | 1170.40647 | 0.91932 | 1170.40647 | 0.9049  |
| 1168.9774  | 0.97894 | 1168.9774  | 0.67646 | 1168.9774  | 0.90995 | 1168.9774  | 0.90281 |
| 1167.54834 | 0.97542 | 1167.54834 | 0.66625 | 1167.54834 | 0.90016 | 1167.54834 | 0.90043 |
| 1166.11927 | 0.97138 | 1166.11927 | 0.65692 | 1166.11927 | 0.88985 | 1166.11927 | 0.89754 |
| 1164.6902  | 0.96668 | 1164.6902  | 0.64869 | 1164.6902  | 0.8789  | 1164.6902  | 0.89385 |
| 1163.26113 | 0.96113 | 1163.26113 | 0.64171 | 1163.26113 | 0.86726 | 1163.26113 | 0.88896 |
| 1161.83207 | 0.95434 | 1161.83207 | 0.63602 | 1161.83207 | 0.85497 | 1161.83207 | 0.88234 |
| 1160.403   | 0.94579 | 1160.403   | 0.6316  | 1160.403   | 0.84202 | 1160.403   | 0.87319 |
| 1158.97393 | 0.93478 | 1158.97393 | 0.62846 | 1158.97393 | 0.82827 | 1158.97393 | 0.86044 |
| 1157.54486 | 0.92053 | 1157.54486 | 0.62663 | 1157.54486 | 0.81359 | 1157.54486 | 0.84288 |
| 1156.11579 | 0.90229 | 1156.11579 | 0.62608 | 1156.11579 | 0.79785 | 1156.11579 | 0.81944 |
| 1154.68673 | 0.8798  | 1154.68673 | 0.62676 | 1154.68673 | 0.78092 | 1154.68673 | 0.78976 |
| 1153.25766 | 0.85351 | 1153.25766 | 0.62865 | 1153.25766 | 0.76288 | 1153.25766 | 0.75459 |
| 1151.82859 | 0.82466 | 1151.82859 | 0.63175 | 1151.82859 | 0.74422 | 1151.82859 | 0.71598 |
| 1150.39952 | 0.79541 | 1150.39952 | 0.63597 | 1150.39952 | 0.726   | 1150.39952 | 0.67691 |
| 1148.97046 | 0.76877 | 1148.97046 | 0.6411  | 1148.97046 | 0.70974 | 1148.97046 | 0.64069 |
| 1147.54139 | 0.7473  | 1147.54139 | 0.64691 | 1147.54139 | 0.69683 | 1147.54139 | 0.61038 |
| 1146.11232 | 0.73096 | 1146.11232 | 0.65313 | 1146.11232 | 0.68759 | 1146.11232 | 0.58824 |

|            |         |            |         |            |         |            |         |
|------------|---------|------------|---------|------------|---------|------------|---------|
| 1144.68325 | 0.71656 | 1144.68325 | 0.65934 | 1144.68325 | 0.68085 | 1144.68325 | 0.57541 |
| 1143.25418 | 0.70116 | 1143.25418 | 0.66493 | 1143.25418 | 0.6753  | 1143.25418 | 0.57168 |
| 1141.82512 | 0.68684 | 1141.82512 | 0.66924 | 1141.82512 | 0.6714  | 1141.82512 | 0.57549 |
| 1140.39605 | 0.68024 | 1140.39605 | 0.67176 | 1140.39605 | 0.67105 | 1140.39605 | 0.58409 |
| 1138.96698 | 0.68521 | 1138.96698 | 0.67214 | 1138.96698 | 0.67477 | 1138.96698 | 0.59427 |
| 1137.53791 | 0.69717 | 1137.53791 | 0.67029 | 1137.53791 | 0.67986 | 1137.53791 | 0.60334 |
| 1136.10885 | 0.70626 | 1136.10885 | 0.66635 | 1136.10885 | 0.68223 | 1136.10885 | 0.60986 |
| 1134.67978 | 0.70522 | 1134.67978 | 0.66072 | 1134.67978 | 0.67941 | 1134.67978 | 0.61354 |
| 1133.25071 | 0.69295 | 1133.25071 | 0.6539  | 1133.25071 | 0.67145 | 1133.25071 | 0.61486 |
| 1131.82164 | 0.6719  | 1131.82164 | 0.64642 | 1131.82164 | 0.65961 | 1131.82164 | 0.61451 |
| 1130.39258 | 0.64473 | 1130.39258 | 0.63873 | 1130.39258 | 0.64498 | 1130.39258 | 0.61314 |
| 1128.96351 | 0.61326 | 1128.96351 | 0.63129 | 1128.96351 | 0.62836 | 1128.96351 | 0.61123 |
| 1127.53444 | 0.57869 | 1127.53444 | 0.62439 | 1127.53444 | 0.61039 | 1127.53444 | 0.60905 |
| 1126.10537 | 0.54193 | 1126.10537 | 0.61812 | 1126.10537 | 0.59157 | 1126.10537 | 0.60661 |
| 1124.6763  | 0.50384 | 1124.6763  | 0.61239 | 1124.6763  | 0.57216 | 1124.6763  | 0.60379 |
| 1123.24724 | 0.46545 | 1123.24724 | 0.60717 | 1123.24724 | 0.55243 | 1123.24724 | 0.60053 |
| 1121.81817 | 0.42802 | 1121.81817 | 0.60241 | 1121.81817 | 0.5328  | 1121.81817 | 0.5968  |
| 1120.3891  | 0.39275 | 1120.3891  | 0.59806 | 1120.3891  | 0.51389 | 1120.3891  | 0.59259 |
| 1118.96003 | 0.36069 | 1118.96003 | 0.59398 | 1118.96003 | 0.4963  | 1118.96003 | 0.58784 |
| 1117.53097 | 0.33259 | 1117.53097 | 0.59001 | 1117.53097 | 0.48042 | 1117.53097 | 0.58244 |
| 1116.1019  | 0.30891 | 1116.1019  | 0.58599 | 1116.1019  | 0.4665  | 1116.1019  | 0.57622 |
| 1114.67283 | 0.2898  | 1114.67283 | 0.58187 | 1114.67283 | 0.45469 | 1114.67283 | 0.569   |
| 1113.24376 | 0.27506 | 1113.24376 | 0.57762 | 1113.24376 | 0.44494 | 1113.24376 | 0.56068 |
| 1111.81469 | 0.26423 | 1111.81469 | 0.57316 | 1111.81469 | 0.43695 | 1111.81469 | 0.55125 |
| 1110.38563 | 0.25662 | 1110.38563 | 0.56844 | 1110.38563 | 0.43031 | 1110.38563 | 0.54083 |
| 1108.95656 | 0.25145 | 1108.95656 | 0.56352 | 1108.95656 | 0.42461 | 1108.95656 | 0.52961 |
| 1107.52749 | 0.24793 | 1107.52749 | 0.55858 | 1107.52749 | 0.41949 | 1107.52749 | 0.51792 |
| 1106.09842 | 0.24539 | 1106.09842 | 0.55382 | 1106.09842 | 0.41464 | 1106.09842 | 0.50632 |
| 1104.66936 | 0.24327 | 1104.66936 | 0.54942 | 1104.66936 | 0.4098  | 1104.66936 | 0.49546 |
| 1103.24029 | 0.24112 | 1103.24029 | 0.54544 | 1103.24029 | 0.40481 | 1103.24029 | 0.48587 |
| 1101.81122 | 0.23862 | 1101.81122 | 0.54202 | 1101.81122 | 0.39967 | 1101.81122 | 0.47786 |
| 1100.38215 | 0.23561 | 1100.38215 | 0.53922 | 1100.38215 | 0.39443 | 1100.38215 | 0.47156 |
| 1098.95309 | 0.23203 | 1098.95309 | 0.537   | 1098.95309 | 0.38915 | 1098.95309 | 0.46697 |
| 1097.52402 | 0.22799 | 1097.52402 | 0.53529 | 1097.52402 | 0.38392 | 1097.52402 | 0.46402 |
| 1096.09495 | 0.22361 | 1096.09495 | 0.53397 | 1096.09495 | 0.37885 | 1096.09495 | 0.4626  |
| 1094.66588 | 0.21904 | 1094.66588 | 0.53292 | 1094.66588 | 0.37397 | 1094.66588 | 0.4626  |
| 1093.23681 | 0.21444 | 1093.23681 | 0.53206 | 1093.23681 | 0.36926 | 1093.23681 | 0.4639  |
| 1091.80775 | 0.20998 | 1091.80775 | 0.53129 | 1091.80775 | 0.36478 | 1091.80775 | 0.46638 |
| 1090.37868 | 0.20571 | 1090.37868 | 0.53051 | 1090.37868 | 0.36059 | 1090.37868 | 0.46992 |
| 1088.94961 | 0.20173 | 1088.94961 | 0.52967 | 1088.94961 | 0.35676 | 1088.94961 | 0.47442 |
| 1087.52054 | 0.19816 | 1087.52054 | 0.52875 | 1087.52054 | 0.3533  | 1087.52054 | 0.4798  |
| 1086.09148 | 0.19512 | 1086.09148 | 0.52777 | 1086.09148 | 0.35019 | 1086.09148 | 0.4859  |
| 1084.66241 | 0.19265 | 1084.66241 | 0.52674 | 1084.66241 | 0.34741 | 1084.66241 | 0.49255 |
| 1083.23334 | 0.19075 | 1083.23334 | 0.52576 | 1083.23334 | 0.34491 | 1083.23334 | 0.4996  |
| 1081.80427 | 0.18938 | 1081.80427 | 0.5249  | 1081.80427 | 0.34264 | 1081.80427 | 0.50688 |
| 1080.3752  | 0.18859 | 1080.3752  | 0.52425 | 1080.3752  | 0.34067 | 1080.3752  | 0.51417 |
| 1078.94614 | 0.18848 | 1078.94614 | 0.52388 | 1078.94614 | 0.33921 | 1078.94614 | 0.52122 |
| 1077.51707 | 0.18919 | 1077.51707 | 0.52382 | 1077.51707 | 0.33839 | 1077.51707 | 0.52789 |
| 1076.088   | 0.19084 | 1076.088   | 0.52406 | 1076.088   | 0.33816 | 1076.088   | 0.53414 |
| 1074.65893 | 0.19356 | 1074.65893 | 0.52454 | 1074.65893 | 0.33845 | 1074.65893 | 0.54    |
| 1073.22987 | 0.19753 | 1073.22987 | 0.52518 | 1073.22987 | 0.33945 | 1073.22987 | 0.54548 |
| 1071.8008  | 0.20293 | 1071.8008  | 0.52586 | 1071.8008  | 0.34144 | 1071.8008  | 0.55063 |
| 1070.37173 | 0.21001 | 1070.37173 | 0.52656 | 1070.37173 | 0.34467 | 1070.37173 | 0.55556 |
| 1068.94266 | 0.21897 | 1068.94266 | 0.52725 | 1068.94266 | 0.34925 | 1068.94266 | 0.56043 |

|            |         |            |         |            |         |            |         |
|------------|---------|------------|---------|------------|---------|------------|---------|
| 1067.51359 | 0.23003 | 1067.51359 | 0.52795 | 1067.51359 | 0.3553  | 1067.51359 | 0.56541 |
| 1066.08453 | 0.24342 | 1066.08453 | 0.52874 | 1066.08453 | 0.36295 | 1066.08453 | 0.57057 |
| 1064.65546 | 0.2594  | 1064.65546 | 0.52974 | 1064.65546 | 0.37239 | 1064.65546 | 0.5759  |
| 1063.22639 | 0.27825 | 1063.22639 | 0.53108 | 1063.22639 | 0.38383 | 1063.22639 | 0.58134 |
| 1061.79732 | 0.30033 | 1061.79732 | 0.53291 | 1061.79732 | 0.39756 | 1061.79732 | 0.58683 |
| 1060.36826 | 0.32606 | 1060.36826 | 0.53535 | 1060.36826 | 0.41385 | 1060.36826 | 0.59231 |
| 1058.93919 | 0.35571 | 1058.93919 | 0.53842 | 1058.93919 | 0.43276 | 1058.93919 | 0.59771 |
| 1057.51012 | 0.38922 | 1057.51012 | 0.54204 | 1057.51012 | 0.45414 | 1057.51012 | 0.60295 |
| 1056.08105 | 0.42612 | 1056.08105 | 0.54607 | 1056.08105 | 0.47751 | 1056.08105 | 0.60805 |
| 1054.65199 | 0.46552 | 1054.65199 | 0.5503  | 1054.65199 | 0.50202 | 1054.65199 | 0.61301 |
| 1053.22292 | 0.50628 | 1053.22292 | 0.55443 | 1053.22292 | 0.52661 | 1053.22292 | 0.61787 |
| 1051.79385 | 0.54726 | 1051.79385 | 0.5582  | 1051.79385 | 0.55029 | 1051.79385 | 0.62271 |
| 1050.36478 | 0.58756 | 1050.36478 | 0.56131 | 1050.36478 | 0.5723  | 1050.36478 | 0.62764 |
| 1048.93571 | 0.6264  | 1048.93571 | 0.56353 | 1048.93571 | 0.59215 | 1048.93571 | 0.63278 |
| 1047.50665 | 0.66299 | 1047.50665 | 0.56478 | 1047.50665 | 0.60943 | 1047.50665 | 0.63813 |
| 1046.07758 | 0.69637 | 1046.07758 | 0.56508 | 1046.07758 | 0.62373 | 1046.07758 | 0.64373 |
| 1044.64851 | 0.72543 | 1044.64851 | 0.56449 | 1044.64851 | 0.63477 | 1044.64851 | 0.64963 |
| 1043.21944 | 0.74908 | 1043.21944 | 0.56316 | 1043.21944 | 0.64245 | 1043.21944 | 0.65597 |
| 1041.79038 | 0.76639 | 1041.79038 | 0.56129 | 1041.79038 | 0.64676 | 1041.79038 | 0.6628  |
| 1040.36131 | 0.77659 | 1040.36131 | 0.55912 | 1040.36131 | 0.64768 | 1040.36131 | 0.67008 |
| 1038.93224 | 0.77907 | 1038.93224 | 0.55693 | 1038.93224 | 0.64533 | 1038.93224 | 0.67762 |
| 1037.50317 | 0.77326 | 1037.50317 | 0.55491 | 1037.50317 | 0.63991 | 1037.50317 | 0.68518 |
| 1036.0741  | 0.75862 | 1036.0741  | 0.55318 | 1036.0741  | 0.63161 | 1036.0741  | 0.69258 |
| 1034.64504 | 0.73462 | 1034.64504 | 0.55186 | 1034.64504 | 0.6205  | 1034.64504 | 0.69966 |
| 1033.21597 | 0.70074 | 1033.21597 | 0.55104 | 1033.21597 | 0.60659 | 1033.21597 | 0.70634 |
| 1031.7869  | 0.6569  | 1031.7869  | 0.55073 | 1031.7869  | 0.58989 | 1031.7869  | 0.71253 |
| 1030.35783 | 0.60474 | 1030.35783 | 0.5509  | 1030.35783 | 0.57071 | 1030.35783 | 0.71821 |
| 1028.92877 | 0.54863 | 1028.92877 | 0.55152 | 1028.92877 | 0.55006 | 1028.92877 | 0.72345 |
| 1027.4997  | 0.4948  | 1027.4997  | 0.55256 | 1027.4997  | 0.52968 | 1027.4997  | 0.72831 |
| 1026.07063 | 0.44855 | 1026.07063 | 0.554   | 1026.07063 | 0.5114  | 1026.07063 | 0.73289 |
| 1024.64156 | 0.41217 | 1024.64156 | 0.55582 | 1024.64156 | 0.4963  | 1024.64156 | 0.73732 |
| 1023.2125  | 0.38534 | 1023.2125  | 0.55795 | 1023.2125  | 0.48456 | 1023.2125  | 0.7418  |
| 1021.78343 | 0.36711 | 1021.78343 | 0.56042 | 1021.78343 | 0.47608 | 1021.78343 | 0.74649 |
| 1020.35436 | 0.35708 | 1020.35436 | 0.56328 | 1020.35436 | 0.47105 | 1020.35436 | 0.75154 |
| 1018.92529 | 0.35513 | 1018.92529 | 0.56652 | 1018.92529 | 0.46981 | 1018.92529 | 0.75709 |
| 1017.49622 | 0.36083 | 1017.49622 | 0.57008 | 1017.49622 | 0.47243 | 1017.49622 | 0.76328 |
| 1016.06716 | 0.37338 | 1016.06716 | 0.57389 | 1016.06716 | 0.47861 | 1016.06716 | 0.77024 |
| 1014.63809 | 0.39169 | 1014.63809 | 0.57787 | 1014.63809 | 0.48787 | 1014.63809 | 0.77804 |
| 1013.20902 | 0.41459 | 1013.20902 | 0.58198 | 1013.20902 | 0.49963 | 1013.20902 | 0.78668 |
| 1011.77995 | 0.44086 | 1011.77995 | 0.58612 | 1011.77995 | 0.51326 | 1011.77995 | 0.79608 |
| 1010.35089 | 0.46921 | 1010.35089 | 0.59013 | 1010.35089 | 0.52808 | 1010.35089 | 0.80599 |
| 1008.92182 | 0.49846 | 1008.92182 | 0.59387 | 1008.92182 | 0.54342 | 1008.92182 | 0.81611 |
| 1007.49275 | 0.52762 | 1007.49275 | 0.59725 | 1007.49275 | 0.55877 | 1007.49275 | 0.8261  |
| 1006.06368 | 0.55594 | 1006.06368 | 0.60016 | 1006.06368 | 0.57371 | 1006.06368 | 0.83572 |
| 1004.63461 | 0.58286 | 1004.63461 | 0.60249 | 1004.63461 | 0.58792 | 1004.63461 | 0.84482 |
| 1003.20555 | 0.60806 | 1003.20555 | 0.60421 | 1003.20555 | 0.60128 | 1003.20555 | 0.85336 |
| 1001.77648 | 0.63139 | 1001.77648 | 0.6054  | 1001.77648 | 0.61383 | 1001.77648 | 0.86138 |
| 1000.34741 | 0.65286 | 1000.34741 | 0.60614 | 1000.34741 | 0.62579 | 1000.34741 | 0.86896 |
| 998.91834  | 0.6725  | 998.91834  | 0.60654 | 998.91834  | 0.63736 | 998.91834  | 0.87615 |
| 997.48928  | 0.69045 | 997.48928  | 0.60674 | 997.48928  | 0.6486  | 997.48928  | 0.88297 |
| 996.06021  | 0.70678 | 996.06021  | 0.60692 | 996.06021  | 0.65939 | 996.06021  | 0.88937 |
| 994.63114  | 0.72159 | 994.63114  | 0.60726 | 994.63114  | 0.66963 | 994.63114  | 0.89528 |
| 993.20207  | 0.73491 | 993.20207  | 0.60793 | 993.20207  | 0.67931 | 993.20207  | 0.90072 |
| 991.77301  | 0.7468  | 991.77301  | 0.60906 | 991.77301  | 0.68847 | 991.77301  | 0.90585 |

|           |         |           |         |           |         |           |         |
|-----------|---------|-----------|---------|-----------|---------|-----------|---------|
| 990.34394 | 0.75733 | 990.34394 | 0.6108  | 990.34394 | 0.69713 | 990.34394 | 0.91083 |
| 988.91487 | 0.76664 | 988.91487 | 0.61331 | 988.91487 | 0.70531 | 988.91487 | 0.91578 |
| 987.4858  | 0.77487 | 987.4858  | 0.61674 | 987.4858  | 0.71296 | 987.4858  | 0.92073 |
| 986.05673 | 0.78215 | 986.05673 | 0.62118 | 986.05673 | 0.7201  | 986.05673 | 0.92566 |
| 984.62767 | 0.78867 | 984.62767 | 0.62667 | 984.62767 | 0.72687 | 984.62767 | 0.93056 |
| 983.1986  | 0.79461 | 983.1986  | 0.63316 | 983.1986  | 0.73335 | 983.1986  | 0.93537 |
| 981.76953 | 0.80007 | 981.76953 | 0.6405  | 981.76953 | 0.73946 | 981.76953 | 0.94007 |
| 980.34046 | 0.80507 | 980.34046 | 0.64851 | 980.34046 | 0.74503 | 980.34046 | 0.94461 |
| 978.9114  | 0.80953 | 978.9114  | 0.65694 | 978.9114  | 0.75006 | 978.9114  | 0.94902 |
| 977.48233 | 0.81337 | 977.48233 | 0.66555 | 977.48233 | 0.7546  | 977.48233 | 0.95337 |
| 976.05326 | 0.81655 | 976.05326 | 0.67413 | 976.05326 | 0.75864 | 976.05326 | 0.9577  |
| 974.62419 | 0.8191  | 974.62419 | 0.68252 | 974.62419 | 0.76218 | 974.62419 | 0.96202 |
| 973.19512 | 0.821   | 973.19512 | 0.69064 | 973.19512 | 0.76531 | 973.19512 | 0.96626 |
| 971.76606 | 0.8223  | 971.76606 | 0.69844 | 971.76606 | 0.7681  | 971.76606 | 0.97029 |
| 970.33699 | 0.82305 | 970.33699 | 0.70588 | 970.33699 | 0.77045 | 970.33699 | 0.97403 |
| 968.90792 | 0.82331 | 968.90792 | 0.7129  | 968.90792 | 0.7723  | 968.90792 | 0.97739 |
| 967.47885 | 0.82322 | 967.47885 | 0.71948 | 967.47885 | 0.77372 | 967.47885 | 0.98032 |
| 966.04979 | 0.8229  | 966.04979 | 0.72565 | 966.04979 | 0.7748  | 966.04979 | 0.98283 |
| 964.62072 | 0.82237 | 964.62072 | 0.73139 | 964.62072 | 0.7755  | 964.62072 | 0.98509 |
| 963.19165 | 0.8216  | 963.19165 | 0.73665 | 963.19165 | 0.77574 | 963.19165 | 0.9873  |
| 961.76258 | 0.82052 | 961.76258 | 0.74144 | 961.76258 | 0.77544 | 961.76258 | 0.98961 |
| 960.33352 | 0.81901 | 960.33352 | 0.74575 | 960.33352 | 0.77463 | 960.33352 | 0.99202 |
| 958.90445 | 0.81695 | 958.90445 | 0.74961 | 958.90445 | 0.77329 | 958.90445 | 0.99442 |
| 957.47538 | 0.81429 | 957.47538 | 0.75306 | 957.47538 | 0.77138 | 957.47538 | 0.9966  |
| 956.04631 | 0.81097 | 956.04631 | 0.75613 | 956.04631 | 0.76888 | 956.04631 | 0.99833 |
| 954.61724 | 0.80692 | 954.61724 | 0.75892 | 954.61724 | 0.7658  | 954.61724 | 0.99946 |
| 953.18818 | 0.8021  | 953.18818 | 0.76155 | 953.18818 | 0.76214 | 953.18818 | 1       |
| 951.75911 | 0.7965  | 951.75911 | 0.76415 | 951.75911 | 0.75788 | 951.75911 | 1.00012 |
| 950.33004 | 0.79017 | 950.33004 | 0.76681 | 950.33004 | 0.75304 | 950.33004 | 1.00002 |
| 948.90097 | 0.78313 | 948.90097 | 0.76962 | 948.90097 | 0.74771 | 948.90097 | 0.99967 |
| 947.47191 | 0.77535 | 947.47191 | 0.7726  | 947.47191 | 0.74203 | 947.47191 | 0.99911 |
| 946.04284 | 0.76681 | 946.04284 | 0.7758  | 946.04284 | 0.73617 | 946.04284 | 0.99824 |
| 944.61377 | 0.75751 | 944.61377 | 0.77925 | 944.61377 | 0.73021 | 944.61377 | 0.99682 |
| 943.1847  | 0.74749 | 943.1847  | 0.78292 | 943.1847  | 0.72418 | 943.1847  | 0.99462 |
| 941.75563 | 0.73678 | 941.75563 | 0.78673 | 941.75563 | 0.71802 | 941.75563 | 0.99153 |
| 940.32657 | 0.72551 | 940.32657 | 0.79058 | 940.32657 | 0.71162 | 940.32657 | 0.98763 |
| 938.8975  | 0.71377 | 938.8975  | 0.7944  | 938.8975  | 0.70495 | 938.8975  | 0.98309 |
| 937.46843 | 0.70162 | 937.46843 | 0.79813 | 937.46843 | 0.69806 | 937.46843 | 0.97804 |
| 936.03936 | 0.6891  | 936.03936 | 0.80178 | 936.03936 | 0.69104 | 936.03936 | 0.97261 |
| 934.6103  | 0.67625 | 934.6103  | 0.80542 | 934.6103  | 0.68392 | 934.6103  | 0.96697 |
| 933.18123 | 0.66311 | 933.18123 | 0.8091  | 933.18123 | 0.67671 | 933.18123 | 0.96128 |
| 931.75216 | 0.64968 | 931.75216 | 0.81295 | 931.75216 | 0.66933 | 931.75216 | 0.95559 |
| 930.32309 | 0.63592 | 930.32309 | 0.81705 | 930.32309 | 0.6617  | 930.32309 | 0.94984 |
| 928.89403 | 0.62177 | 928.89403 | 0.82146 | 928.89403 | 0.65386 | 928.89403 | 0.944   |
| 927.46496 | 0.60722 | 927.46496 | 0.82621 | 927.46496 | 0.64595 | 927.46496 | 0.93813 |
| 926.03589 | 0.59229 | 926.03589 | 0.83128 | 926.03589 | 0.63802 | 926.03589 | 0.93255 |
| 924.60682 | 0.577   | 924.60682 | 0.83652 | 924.60682 | 0.63002 | 924.60682 | 0.92779 |
| 923.17775 | 0.56135 | 923.17775 | 0.84171 | 923.17775 | 0.62183 | 923.17775 | 0.92448 |
| 921.74869 | 0.54534 | 921.74869 | 0.84661 | 921.74869 | 0.61342 | 921.74869 | 0.92291 |
| 920.31962 | 0.52894 | 920.31962 | 0.85093 | 920.31962 | 0.60479 | 920.31962 | 0.92292 |
| 918.89055 | 0.51209 | 918.89055 | 0.8544  | 918.89055 | 0.59581 | 918.89055 | 0.92406 |
| 917.46148 | 0.4948  | 917.46148 | 0.8568  | 917.46148 | 0.58629 | 917.46148 | 0.92595 |
| 916.03242 | 0.47712 | 916.03242 | 0.85797 | 916.03242 | 0.57619 | 916.03242 | 0.9284  |
| 914.60335 | 0.4591  | 914.60335 | 0.85788 | 914.60335 | 0.56571 | 914.60335 | 0.93138 |



|           |         |           |         |           |         |           |         |
|-----------|---------|-----------|---------|-----------|---------|-----------|---------|
| 913.17428 | 0.44075 | 913.17428 | 0.85659 | 913.17428 | 0.55503 | 913.17428 | 0.93485 |
| 911.74521 | 0.42208 | 911.74521 | 0.85424 | 911.74521 | 0.54403 | 911.74521 | 0.93872 |
| 910.31614 | 0.40311 | 910.31614 | 0.85095 | 910.31614 | 0.53252 | 910.31614 | 0.94286 |
| 908.88708 | 0.38385 | 908.88708 | 0.84698 | 908.88708 | 0.52045 | 908.88708 | 0.94708 |
| 907.45801 | 0.36436 | 907.45801 | 0.8426  | 907.45801 | 0.50796 | 907.45801 | 0.95117 |
| 906.02894 | 0.34476 | 906.02894 | 0.8381  | 906.02894 | 0.49518 | 906.02894 | 0.95492 |
| 904.59987 | 0.32518 | 904.59987 | 0.8337  | 904.59987 | 0.48218 | 904.59987 | 0.95818 |
| 903.17081 | 0.30577 | 903.17081 | 0.82958 | 903.17081 | 0.46913 | 903.17081 | 0.96083 |
| 901.74174 | 0.28667 | 901.74174 | 0.82594 | 901.74174 | 0.45619 | 901.74174 | 0.96289 |
| 900.31267 | 0.26802 | 900.31267 | 0.82295 | 900.31267 | 0.44343 | 900.31267 | 0.96451 |
| 898.8836  | 0.24988 | 898.8836  | 0.82071 | 898.8836  | 0.43088 | 898.8836  | 0.96599 |
| 897.45454 | 0.23232 | 897.45454 | 0.81927 | 897.45454 | 0.41873 | 897.45454 | 0.96766 |
| 896.02547 | 0.2154  | 896.02547 | 0.81873 | 896.02547 | 0.40714 | 896.02547 | 0.9698  |
| 894.5964  | 0.19924 | 894.5964  | 0.81923 | 894.5964  | 0.39607 | 894.5964  | 0.97255 |
| 893.16733 | 0.18402 | 893.16733 | 0.82082 | 893.16733 | 0.38539 | 893.16733 | 0.97595 |
| 891.73826 | 0.17    | 891.73826 | 0.82353 | 891.73826 | 0.37513 | 891.73826 | 0.97983 |
| 890.3092  | 0.15747 | 890.3092  | 0.82725 | 890.3092  | 0.3655  | 890.3092  | 0.98397 |
| 888.88013 | 0.14675 | 888.88013 | 0.8318  | 888.88013 | 0.35671 | 888.88013 | 0.98808 |
| 887.45106 | 0.13812 | 887.45106 | 0.83686 | 887.45106 | 0.34889 | 887.45106 | 0.99187 |
| 886.02199 | 0.13178 | 886.02199 | 0.84212 | 886.02199 | 0.34224 | 886.02199 | 0.99509 |
| 884.59293 | 0.12781 | 884.59293 | 0.84739 | 884.59293 | 0.33713 | 884.59293 | 0.99758 |
| 883.16386 | 0.12615 | 883.16386 | 0.85268 | 883.16386 | 0.33384 | 883.16386 | 0.99921 |
| 881.73479 | 0.12655 | 881.73479 | 0.85786 | 881.73479 | 0.33232 | 881.73479 | 0.99981 |
| 880.30572 | 0.12863 | 880.30572 | 0.8626  | 880.30572 | 0.33226 | 880.30572 | 1       |
| 878.87665 | 0.13208 | 878.87665 | 0.86658 | 878.87665 | 0.3333  | 878.87665 | 0.99829 |
| 877.44759 | 0.1366  | 877.44759 | 0.86978 | 877.44759 | 0.33518 | 877.44759 | 0.99408 |
| 876.01852 | 0.142   | 876.01852 | 0.87249 | 876.01852 | 0.33771 | 876.01852 | 0.98693 |
| 874.58945 | 0.14821 | 874.58945 | 0.87515 | 874.58945 | 0.34078 | 874.58945 | 0.97662 |
| 873.16038 | 0.15535 | 873.16038 | 0.8784  | 873.16038 | 0.34444 | 873.16038 | 0.96331 |
| 871.73132 | 0.16366 | 871.73132 | 0.88314 | 871.73132 | 0.349   | 871.73132 | 0.94764 |
| 870.30225 | 0.17349 | 870.30225 | 0.89021 | 870.30225 | 0.35509 | 870.30225 | 0.93034 |
| 868.87318 | 0.18506 | 868.87318 | 0.89992 | 868.87318 | 0.36332 | 868.87318 | 0.91179 |
| 867.44411 | 0.19835 | 867.44411 | 0.91171 | 867.44411 | 0.37382 | 867.44411 | 0.89193 |
| 866.01504 | 0.21313 | 866.01504 | 0.92436 | 866.01504 | 0.38597 | 866.01504 | 0.87069 |
| 864.58598 | 0.22917 | 864.58598 | 0.93661 | 864.58598 | 0.39878 | 864.58598 | 0.84861 |
| 863.15691 | 0.24639 | 863.15691 | 0.94757 | 863.15691 | 0.41155 | 863.15691 | 0.82677 |
| 861.72784 | 0.2649  | 861.72784 | 0.95679 | 861.72784 | 0.42414 | 861.72784 | 0.80641 |
| 860.29877 | 0.28483 | 860.29877 | 0.96415 | 860.29877 | 0.43679 | 860.29877 | 0.78849 |
| 858.86971 | 0.30621 | 858.86971 | 0.96969 | 858.86971 | 0.44982 | 858.86971 | 0.77367 |
| 857.44064 | 0.32901 | 857.44064 | 0.97363 | 857.44064 | 0.46351 | 857.44064 | 0.76231 |
| 856.01157 | 0.35323 | 856.01157 | 0.97637 | 856.01157 | 0.47804 | 856.01157 | 0.75443 |
| 854.5825  | 0.37877 | 854.5825  | 0.97828 | 854.5825  | 0.4934  | 854.5825  | 0.7496  |
| 853.15344 | 0.40531 | 853.15344 | 0.97937 | 853.15344 | 0.50944 | 853.15344 | 0.74708 |
| 851.72437 | 0.43231 | 851.72437 | 0.97943 | 851.72437 | 0.52588 | 851.72437 | 0.74601 |
| 850.2953  | 0.45936 | 850.2953  | 0.97859 | 850.2953  | 0.54272 | 850.2953  | 0.74587 |
| 848.86623 | 0.4865  | 848.86623 | 0.97795 | 848.86623 | 0.56058 | 848.86623 | 0.74665 |
| 847.43716 | 0.51415 | 847.43716 | 0.97898 | 847.43716 | 0.58027 | 847.43716 | 0.74863 |
| 846.0081  | 0.5423  | 846.0081  | 0.98214 | 846.0081  | 0.60183 | 846.0081  | 0.75179 |
| 844.57903 | 0.57035 | 844.57903 | 0.98645 | 844.57903 | 0.62433 | 844.57903 | 0.75569 |
| 843.14996 | 0.59754 | 843.14996 | 0.99062 | 843.14996 | 0.64685 | 843.14996 | 0.75987 |
| 841.72089 | 0.62347 | 841.72089 | 0.99402 | 841.72089 | 0.6691  | 841.72089 | 0.76408 |
| 840.29183 | 0.64814 | 840.29183 | 0.99662 | 840.29183 | 0.69115 | 840.29183 | 0.76826 |
| 838.86276 | 0.67165 | 838.86276 | 0.99851 | 838.86276 | 0.71291 | 838.86276 | 0.77241 |
| 837.43369 | 0.69409 | 837.43369 | 0.99966 | 837.43369 | 0.73422 | 837.43369 | 0.77654 |

|           |         |           |         |           |         |           |         |
|-----------|---------|-----------|---------|-----------|---------|-----------|---------|
| 836.00462 | 0.71539 | 836.00462 | 1       | 836.00462 | 0.75501 | 836.00462 | 0.78066 |
| 834.57555 | 0.73545 | 834.57555 | 0.99995 | 834.57555 | 0.77533 | 834.57555 | 0.78478 |
| 833.14649 | 0.75423 | 833.14649 | 0.99918 | 833.14649 | 0.79513 | 833.14649 | 0.78895 |
| 831.71742 | 0.77169 | 831.71742 | 0.99798 | 831.71742 | 0.81418 | 831.71742 | 0.79332 |
| 830.28835 | 0.78782 | 830.28835 | 0.99674 | 830.28835 | 0.83224 | 830.28835 | 0.79813 |
| 828.85928 | 0.80244 | 828.85928 | 0.99579 | 828.85928 | 0.8491  | 828.85928 | 0.80347 |
| 827.43022 | 0.81526 | 827.43022 | 0.99525 | 827.43022 | 0.86467 | 827.43022 | 0.80923 |
| 826.00115 | 0.82605 | 826.00115 | 0.9952  | 826.00115 | 0.87898 | 826.00115 | 0.81516 |
| 824.57208 | 0.83471 | 824.57208 | 0.99575 | 824.57208 | 0.89198 | 824.57208 | 0.82112 |
| 823.14301 | 0.84095 | 823.14301 | 0.9968  | 823.14301 | 0.90336 | 823.14301 | 0.82727 |
| 821.71395 | 0.84425 | 821.71395 | 0.998   | 821.71395 | 0.91263 | 821.71395 | 0.83387 |
| 820.28488 | 0.84389 | 820.28488 | 0.99902 | 820.28488 | 0.91933 | 820.28488 | 0.84125 |
| 818.85581 | 0.839   | 818.85581 | 0.99967 | 818.85581 | 0.92296 | 818.85581 | 0.84972 |
| 817.42674 | 0.8285  | 817.42674 | 1       | 817.42674 | 0.9229  | 817.42674 | 0.85954 |
| 815.99767 | 0.81105 | 815.99767 | 0.99999 | 815.99767 | 0.91841 | 815.99767 | 0.8707  |
| 814.56861 | 0.78527 | 814.56861 | 0.99929 | 814.56861 | 0.90869 | 814.56861 | 0.88284 |
| 813.13954 | 0.75028 | 813.13954 | 0.99796 | 813.13954 | 0.89289 | 813.13954 | 0.89539 |
| 811.71047 | 0.70651 | 811.71047 | 0.99632 | 811.71047 | 0.87072 | 811.71047 | 0.90773 |
| 810.2814  | 0.65615 | 810.2814  | 0.9947  | 810.2814  | 0.84309 | 810.2814  | 0.91938 |
| 808.85234 | 0.60337 | 808.85234 | 0.99327 | 808.85234 | 0.81246 | 808.85234 | 0.92997 |
| 807.42327 | 0.55381 | 807.42327 | 0.99222 | 807.42327 | 0.78223 | 807.42327 | 0.93931 |
| 805.9942  | 0.51308 | 805.9942  | 0.99179 | 805.9942  | 0.75575 | 805.9942  | 0.9474  |
| 804.56513 | 0.48524 | 804.56513 | 0.99214 | 804.56513 | 0.73554 | 804.56513 | 0.95443 |
| 803.13606 | 0.47225 | 803.13606 | 0.99311 | 803.13606 | 0.72312 | 803.13606 | 0.96051 |
| 801.707   | 0.47447 | 801.707   | 0.99425 | 801.707   | 0.71917 | 801.707   | 0.9655  |
| 800.27793 | 0.49144 | 800.27793 | 0.99525 | 800.27793 | 0.72372 | 800.27793 | 0.96921 |
| 798.84886 | 0.5218  | 798.84886 | 0.99608 | 798.84886 | 0.73616 | 798.84886 | 0.97167 |
| 797.41979 | 0.56266 | 797.41979 | 0.99665 | 797.41979 | 0.75495 | 797.41979 | 0.97315 |
| 795.99073 | 0.6095  | 795.99073 | 0.99654 | 795.99073 | 0.77776 | 795.99073 | 0.97395 |
| 794.56166 | 0.65748 | 794.56166 | 0.99551 | 794.56166 | 0.80209 | 794.56166 | 0.97421 |
| 793.13259 | 0.70301 | 793.13259 | 0.99382 | 793.13259 | 0.82591 | 793.13259 | 0.97406 |
| 791.70352 | 0.74403 | 791.70352 | 0.99189 | 791.70352 | 0.84777 | 791.70352 | 0.97361 |
| 790.27446 | 0.7796  | 790.27446 | 0.98985 | 790.27446 | 0.86674 | 790.27446 | 0.97294 |
| 788.84539 | 0.80949 | 788.84539 | 0.98769 | 788.84539 | 0.88247 | 788.84539 | 0.97205 |
| 787.41632 | 0.83411 | 787.41632 | 0.98568 | 787.41632 | 0.89504 | 787.41632 | 0.97087 |
| 785.98725 | 0.8543  | 785.98725 | 0.98434 | 785.98725 | 0.9046  | 785.98725 | 0.96932 |
| 784.55818 | 0.87066 | 784.55818 | 0.98386 | 784.55818 | 0.91128 | 784.55818 | 0.96739 |
| 783.12912 | 0.88352 | 783.12912 | 0.98388 | 783.12912 | 0.91555 | 783.12912 | 0.96517 |
| 781.70005 | 0.89352 | 781.70005 | 0.98412 | 781.70005 | 0.91832 | 781.70005 | 0.96283 |
| 780.27098 | 0.90184 | 780.27098 | 0.98471 | 780.27098 | 0.92061 | 780.27098 | 0.96047 |
| 778.84191 | 0.90936 | 778.84191 | 0.98558 | 778.84191 | 0.92309 | 778.84191 | 0.95813 |
| 777.41285 | 0.91613 | 777.41285 | 0.98613 | 777.41285 | 0.92598 | 777.41285 | 0.95575 |
| 775.98378 | 0.92185 | 775.98378 | 0.98584 | 775.98378 | 0.92907 | 775.98378 | 0.95328 |
| 774.55471 | 0.92623 | 774.55471 | 0.98477 | 774.55471 | 0.93185 | 774.55471 | 0.95066 |
| 773.12564 | 0.92893 | 773.12564 | 0.98327 | 773.12564 | 0.93365 | 773.12564 | 0.94787 |
| 771.69657 | 0.92941 | 771.69657 | 0.98137 | 771.69657 | 0.93404 | 771.69657 | 0.94485 |
| 770.26751 | 0.92735 | 770.26751 | 0.97892 | 770.26751 | 0.93298 | 770.26751 | 0.94168 |
| 768.83844 | 0.92337 | 768.83844 | 0.97624 | 768.83844 | 0.93071 | 768.83844 | 0.93861 |
| 767.40937 | 0.91897 | 767.40937 | 0.97404 | 767.40937 | 0.92772 | 767.40937 | 0.93582 |
| 765.9803  | 0.91546 | 765.9803  | 0.97254 | 765.9803  | 0.92477 | 765.9803  | 0.93333 |
| 764.55124 | 0.9136  | 764.55124 | 0.97136 | 764.55124 | 0.92284 | 764.55124 | 0.93099 |
| 763.12217 | 0.9141  | 763.12217 | 0.97036 | 763.12217 | 0.92272 | 763.12217 | 0.92858 |
| 761.6931  | 0.9177  | 761.6931  | 0.96995 | 761.6931  | 0.92485 | 761.6931  | 0.92596 |
| 760.26403 | 0.92432 | 760.26403 | 0.97026 | 760.26403 | 0.92931 | 760.26403 | 0.92313 |

|           |         |           |         |           |         |           |         |
|-----------|---------|-----------|---------|-----------|---------|-----------|---------|
| 758.83497 | 0.93288 | 758.83497 | 0.97077 | 758.83497 | 0.93572 | 758.83497 | 0.9202  |
| 757.4059  | 0.94208 | 757.4059  | 0.9709  | 757.4059  | 0.94332 | 757.4059  | 0.91732 |
| 755.97683 | 0.9512  | 755.97683 | 0.97062 | 755.97683 | 0.95124 | 755.97683 | 0.91461 |
| 754.54776 | 0.95995 | 754.54776 | 0.97015 | 754.54776 | 0.95888 | 754.54776 | 0.91206 |
| 753.11869 | 0.96783 | 753.11869 | 0.96924 | 753.11869 | 0.96586 | 753.11869 | 0.90965 |
| 751.68963 | 0.97424 | 751.68963 | 0.9674  | 751.68963 | 0.97188 | 751.68963 | 0.90734 |
| 750.26056 | 0.97938 | 750.26056 | 0.96491 | 750.26056 | 0.97682 | 750.26056 | 0.90509 |
| 748.83149 | 0.98392 | 748.83149 | 0.96251 | 748.83149 | 0.98087 | 748.83149 | 0.90274 |
| 747.40242 | 0.98802 | 747.40242 | 0.96044 | 747.40242 | 0.98439 | 747.40242 | 0.90013 |
| 745.97336 | 0.99129 | 745.97336 | 0.95843 | 745.97336 | 0.98755 | 745.97336 | 0.8973  |
| 744.54429 | 0.99366 | 744.54429 | 0.95652 | 744.54429 | 0.99029 | 744.54429 | 0.89442 |
| 743.11522 | 0.99551 | 743.11522 | 0.95511 | 743.11522 | 0.9926  | 743.11522 | 0.89168 |
| 741.68615 | 0.99713 | 741.68615 | 0.95444 | 741.68615 | 0.99467 | 741.68615 | 0.88914 |
| 740.25708 | 0.99839 | 740.25708 | 0.95424 | 740.25708 | 0.99655 | 740.25708 | 0.88677 |
| 738.82802 | 0.99909 | 738.82802 | 0.95408 | 738.82802 | 0.99809 | 738.82802 | 0.8845  |
| 737.39895 | 0.99943 | 737.39895 | 0.95385 | 737.39895 | 0.99912 | 737.39895 | 0.8823  |
| 735.96988 | 0.9997  | 735.96988 | 0.9536  | 735.96988 | 0.99968 | 735.96988 | 0.88011 |
| 734.54081 | 1       | 734.54081 | 0.95302 | 734.54081 | 1       | 734.54081 | 0.87778 |
| 733.11175 | 1.00035 | 733.11175 | 0.9517  | 733.11175 | 1.00019 | 733.11175 | 0.8752  |
| 731.68268 | 1.00067 | 731.68268 | 0.94974 | 731.68268 | 1.00039 | 731.68268 | 0.87233 |
| 730.25361 | 1.00103 | 730.25361 | 0.94742 | 730.25361 | 1.00059 | 730.25361 | 0.86935 |
| 728.82454 | 1.00138 | 728.82454 | 0.9448  | 728.82454 | 1.00068 | 728.82454 | 0.86655 |
| 727.39548 | 1.00141 | 727.39548 | 0.94188 | 727.39548 | 1.00062 | 727.39548 | 0.86411 |
| 725.96641 | 1.00111 | 725.96641 | 0.93874 | 725.96641 | 1.00041 | 725.96641 | 0.86201 |
| 724.53734 | 1.0006  | 724.53734 | 0.9355  | 724.53734 | 0.99982 | 724.53734 | 0.86009 |
| 723.10827 | 1.00006 | 723.10827 | 0.93243 | 723.10827 | 0.99862 | 723.10827 | 0.85805 |
| 721.6792  | 0.99965 | 721.6792  | 0.92989 | 721.6792  | 0.99722 | 721.6792  | 0.85567 |
| 720.25014 | 0.99941 | 720.25014 | 0.92818 | 720.25014 | 0.99648 | 720.25014 | 0.85307 |
| 718.82107 | 0.99929 | 718.82107 | 0.92713 | 718.82107 | 0.99672 | 718.82107 | 0.8506  |
| 717.392   | 0.99919 | 717.392   | 0.92616 | 717.392   | 0.99717 | 717.392   | 0.84841 |
| 715.96293 | 0.99904 | 715.96293 | 0.92491 | 715.96293 | 0.99704 | 715.96293 | 0.84629 |
| 714.53387 | 0.99892 | 714.53387 | 0.92357 | 714.53387 | 0.99638 | 714.53387 | 0.84412 |
| 713.1048  | 0.999   | 713.1048  | 0.92248 | 713.1048  | 0.99565 | 713.1048  | 0.84219 |
| 711.67573 | 0.99926 | 711.67573 | 0.92168 | 711.67573 | 0.9951  | 711.67573 | 0.84085 |
| 710.24666 | 0.9995  | 710.24666 | 0.92098 | 710.24666 | 0.99467 | 710.24666 | 0.84006 |
| 708.81759 | 0.99987 | 708.81759 | 0.92021 | 708.81759 | 0.99423 | 708.81759 | 0.8394  |
| 707.38853 | 0.99986 | 707.38853 | 0.91919 | 707.38853 | 0.99371 | 707.38853 | 0.83849 |
| 705.95946 | 0.99943 | 705.95946 | 0.91797 | 705.95946 | 0.99315 | 705.95946 | 0.83721 |
| 704.53039 | 0.99872 | 704.53039 | 0.91685 | 704.53039 | 0.99257 | 704.53039 | 0.83571 |
| 703.10132 | 0.99774 | 703.10132 | 0.91598 | 703.10132 | 0.99187 | 703.10132 | 0.83419 |
| 701.67226 | 0.99642 | 701.67226 | 0.9154  | 701.67226 | 0.99084 | 701.67226 | 0.83273 |
| 700.24319 | 0.9947  | 700.24319 | 0.91514 | 700.24319 | 0.98938 | 700.24319 | 0.83125 |
| 698.81412 | 0.99244 | 698.81412 | 0.91523 | 698.81412 | 0.98744 | 698.81412 | 0.82978 |
| 697.38505 | 0.98942 | 697.38505 | 0.91565 | 697.38505 | 0.98484 | 697.38505 | 0.82837 |
| 695.95598 | 0.98546 | 695.95598 | 0.91636 | 695.95598 | 0.98129 | 695.95598 | 0.82696 |
| 694.52692 | 0.98025 | 694.52692 | 0.91709 | 694.52692 | 0.97661 | 694.52692 | 0.82542 |
| 693.09785 | 0.97355 | 693.09785 | 0.91749 | 693.09785 | 0.97079 | 693.09785 | 0.82367 |
| 691.66878 | 0.96532 | 691.66878 | 0.91746 | 691.66878 | 0.9639  | 691.66878 | 0.82177 |
| 690.23971 | 0.95566 | 690.23971 | 0.91697 | 690.23971 | 0.95604 | 690.23971 | 0.81985 |
| 688.81065 | 0.94478 | 688.81065 | 0.91593 | 688.81065 | 0.94751 | 688.81065 | 0.81799 |
| 687.38158 | 0.93329 | 687.38158 | 0.91425 | 687.38158 | 0.93891 | 687.38158 | 0.81627 |
| 685.95251 | 0.92216 | 685.95251 | 0.91189 | 685.95251 | 0.93098 | 685.95251 | 0.81466 |
| 684.52344 | 0.91235 | 684.52344 | 0.90892 | 684.52344 | 0.92445 | 684.52344 | 0.81304 |
| 683.09438 | 0.90477 | 683.09438 | 0.90559 | 683.09438 | 0.91998 | 683.09438 | 0.81132 |

|           |         |           |         |           |         |           |         |
|-----------|---------|-----------|---------|-----------|---------|-----------|---------|
| 681.66531 | 0.90022 | 681.66531 | 0.90207 | 681.66531 | 0.91791 | 681.66531 | 0.80957 |
| 680.23624 | 0.8991  | 680.23624 | 0.89836 | 680.23624 | 0.91822 | 680.23624 | 0.80783 |
| 678.80717 | 0.90149 | 678.80717 | 0.89443 | 678.80717 | 0.92063 | 678.80717 | 0.80599 |
| 677.3781  | 0.90712 | 677.3781  | 0.89023 | 677.3781  | 0.92494 | 677.3781  | 0.80406 |
| 675.94904 | 0.91512 | 675.94904 | 0.8856  | 675.94904 | 0.93096 | 675.94904 | 0.80218 |
| 674.51997 | 0.92422 | 674.51997 | 0.88022 | 674.51997 | 0.93785 | 674.51997 | 0.8006  |
| 673.0909  | 0.93256 | 673.0909  | 0.87327 | 673.0909  | 0.94302 | 673.0909  | 0.79972 |
| 671.66183 | 0.93886 | 671.66183 | 0.86443 | 671.66183 | 0.94362 | 671.66183 | 0.79921 |
| 670.23277 | 0.9448  | 670.23277 | 0.85599 | 670.23277 | 0.94039 | 670.23277 | 0.7971  |
| 668.8037  | 0.95494 | 668.8037  | 0.85375 | 668.8037  | 0.9411  | 668.8037  | 0.79112 |
| 667.37463 | 0.96826 | 667.37463 | 0.85841 | 667.37463 | 0.95308 | 667.37463 | 0.78472 |
| 665.94556 | 0.97634 | 665.94556 | 0.86006 | 665.94556 | 0.9668  | 665.94556 | 0.78378 |
| 664.51649 | 0.97901 | 664.51649 | 0.85627 | 664.51649 | 0.97324 | 664.51649 | 0.7859  |
| 663.08743 | 0.98045 | 663.08743 | 0.85151 | 663.08743 | 0.97412 | 663.08743 | 0.78694 |
| 661.65836 | 0.98245 | 661.65836 | 0.84879 | 661.65836 | 0.97281 | 661.65836 | 0.78577 |
| 660.22929 | 0.9847  | 660.22929 | 0.8485  | 660.22929 | 0.97113 | 660.22929 | 0.78337 |
| 658.80022 | 0.98646 | 658.80022 | 0.84981 | 658.80022 | 0.96975 | 658.80022 | 0.78091 |
| 657.37116 | 0.98749 | 657.37116 | 0.85218 | 657.37116 | 0.96901 | 657.37116 | 0.77872 |
| 655.94209 | 0.98783 | 655.94209 | 0.85531 | 655.94209 | 0.96903 | 655.94209 | 0.77668 |
| 654.51302 | 0.98766 | 654.51302 | 0.85876 | 654.51302 | 0.9696  | 654.51302 | 0.77464 |
| 653.08395 | 0.98838 | 653.08395 | 0.86205 | 653.08395 | 0.97038 | 653.08395 | 0.77255 |
| 651.65489 | 0.98898 | 651.65489 | 0.86489 | 651.65489 | 0.97127 | 651.65489 | 0.77072 |
| 650.22582 | 0.98972 | 650.22582 | 0.86719 | 650.22582 | 0.97273 | 650.22582 | 0.76967 |
| 648.79675 | 0.99079 | 648.79675 | 0.86883 | 648.79675 | 0.97554 | 648.79675 | 0.76983 |
| 647.36768 | 0.99223 | 647.36768 | 0.86956 | 647.36768 | 0.9798  | 647.36768 | 0.77137 |
| 645.93861 | 0.99388 | 645.93861 | 0.8692  | 645.93861 | 0.98466 | 645.93861 | 0.77406 |
| 644.50955 | 0.99538 | 644.50955 | 0.86787 | 644.50955 | 0.98915 | 644.50955 | 0.77733 |
| 643.08048 | 0.99651 | 643.08048 | 0.866   | 643.08048 | 0.99279 | 643.08048 | 0.78052 |
| 641.65141 | 0.99722 | 641.65141 | 0.86402 | 641.65141 | 0.99549 | 641.65141 | 0.78319 |
| 640.22234 | 0.99776 | 640.22234 | 0.86222 | 640.22234 | 0.99729 | 640.22234 | 0.78523 |
| 638.79328 | 0.9983  | 638.79328 | 0.86076 | 638.79328 | 0.99836 | 638.79328 | 0.7868  |
| 637.36421 | 0.99871 | 637.36421 | 0.85983 | 637.36421 | 0.999   | 637.36421 | 0.78809 |
| 635.93514 | 0.99915 | 635.93514 | 0.85959 | 635.93514 | 0.99931 | 635.93514 | 0.78917 |
| 634.50607 | 0.99958 | 634.50607 | 0.85998 | 634.50607 | 1       | 634.50607 | 0.79002 |
| 633.077   | 1       | 633.077   | 0.86078 | 633.077   | 1.00019 | 633.077   | 0.79052 |
| 631.64794 | 1.00036 | 631.64794 | 0.86164 | 631.64794 | 0.99981 | 631.64794 | 0.79046 |
| 630.21887 | 1.00075 | 630.21887 | 0.86217 | 630.21887 | 0.99915 | 630.21887 | 0.78972 |
| 628.7898  | 1.00106 | 628.7898  | 0.86215 | 628.7898  | 0.99825 | 628.7898  | 0.78844 |
| 627.36073 | 1.00106 | 627.36073 | 0.86144 | 627.36073 | 0.99702 | 627.36073 | 0.78688 |
| 625.93167 | 1.00055 | 625.93167 | 0.85999 | 625.93167 | 0.99556 | 625.93167 | 0.7852  |
| 624.5026  | 0.99948 | 624.5026  | 0.85782 | 624.5026  | 0.99396 | 624.5026  | 0.7836  |
| 623.07353 | 0.99803 | 623.07353 | 0.85504 | 623.07353 | 0.99209 | 623.07353 | 0.78231 |
| 621.64446 | 0.99643 | 621.64446 | 0.85188 | 621.64446 | 0.98959 | 621.64446 | 0.78145 |
| 620.2154  | 0.99483 | 620.2154  | 0.84878 | 620.2154  | 0.98621 | 620.2154  | 0.78094 |
| 618.78633 | 0.99319 | 618.78633 | 0.84636 | 618.78633 | 0.98221 | 618.78633 | 0.78059 |
| 617.35726 | 0.99134 | 617.35726 | 0.8451  | 617.35726 | 0.97822 | 617.35726 | 0.7805  |
| 615.92819 | 0.98912 | 615.92819 | 0.84497 | 615.92819 | 0.97437 | 615.92819 | 0.78097 |
| 614.49912 | 0.98612 | 614.49912 | 0.84542 | 614.49912 | 0.96993 | 614.49912 | 0.78199 |
| 613.07006 | 0.98163 | 613.07006 | 0.84597 | 613.07006 | 0.96411 | 613.07006 | 0.78327 |
| 611.64099 | 0.97494 | 611.64099 | 0.84654 | 611.64099 | 0.95663 | 611.64099 | 0.78462 |
| 610.21192 | 0.96521 | 610.21192 | 0.84722 | 610.21192 | 0.94729 | 610.21192 | 0.786   |
| 608.78285 | 0.95148 | 608.78285 | 0.84787 | 608.78285 | 0.9356  | 608.78285 | 0.78735 |
| 607.35379 | 0.93354 | 607.35379 | 0.8482  | 607.35379 | 0.92122 | 607.35379 | 0.78859 |
| 605.92472 | 0.91288 | 605.92472 | 0.84799 | 605.92472 | 0.9046  | 605.92472 | 0.7896  |

|           |         |           |         |           |         |           |         |
|-----------|---------|-----------|---------|-----------|---------|-----------|---------|
| 604.49565 | 0.89283 | 604.49565 | 0.84716 | 604.49565 | 0.88752 | 604.49565 | 0.79027 |
| 603.06658 | 0.87754 | 603.06658 | 0.84593 | 603.06658 | 0.87253 | 603.06658 | 0.79059 |
| 601.63751 | 0.86995 | 601.63751 | 0.84471 | 601.63751 | 0.86166 | 601.63751 | 0.79073 |
| 600.20845 | 0.87058 | 600.20845 | 0.84367 | 600.20845 | 0.8555  | 600.20845 | 0.79095 |
| 598.77938 | 0.87758 | 598.77938 | 0.84287 | 598.77938 | 0.85331 | 598.77938 | 0.79147 |
| 597.35031 | 0.88782 | 597.35031 | 0.84237 | 597.35031 | 0.85377 | 597.35031 | 0.7923  |
| 595.92124 | 0.89814 | 595.92124 | 0.84229 | 595.92124 | 0.85549 | 595.92124 | 0.79329 |
| 594.49218 | 0.90636 | 594.49218 | 0.84282 | 594.49218 | 0.8572  | 594.49218 | 0.79423 |
| 593.06311 | 0.91152 | 593.06311 | 0.84409 | 593.06311 | 0.85782 | 593.06311 | 0.79505 |
| 591.63404 | 0.91349 | 591.63404 | 0.84601 | 591.63404 | 0.85679 | 591.63404 | 0.79585 |
| 590.20497 | 0.91276 | 590.20497 | 0.84818 | 590.20497 | 0.8542  | 590.20497 | 0.79676 |
| 588.77591 | 0.90991 | 588.77591 | 0.85008 | 588.77591 | 0.85023 | 588.77591 | 0.79776 |
| 587.34684 | 0.90505 | 587.34684 | 0.85126 | 587.34684 | 0.84478 | 587.34684 | 0.79877 |
| 585.91777 | 0.89799 | 585.91777 | 0.85155 | 585.91777 | 0.83762 | 585.91777 | 0.79982 |
| 584.4887  | 0.88862 | 584.4887  | 0.85114 | 584.4887  | 0.82872 | 584.4887  | 0.80095 |
| 583.05963 | 0.87659 | 583.05963 | 0.85033 | 583.05963 | 0.81809 | 583.05963 | 0.8021  |
| 581.63057 | 0.86084 | 581.63057 | 0.84932 | 581.63057 | 0.80561 | 581.63057 | 0.80327 |
| 580.2015  | 0.84011 | 580.2015  | 0.84811 | 580.2015  | 0.79136 | 580.2015  | 0.80468 |
| 578.77243 | 0.81392 | 578.77243 | 0.8469  | 578.77243 | 0.77561 | 578.77243 | 0.80639 |
| 577.34336 | 0.7834  | 577.34336 | 0.84631 | 577.34336 | 0.7588  | 577.34336 | 0.80807 |
| 575.9143  | 0.75197 | 575.9143  | 0.84679 | 575.9143  | 0.74202 | 575.9143  | 0.80949 |
| 574.48523 | 0.72412 | 574.48523 | 0.84783 | 574.48523 | 0.727   | 574.48523 | 0.81075 |
| 573.05616 | 0.70177 | 573.05616 | 0.8488  | 573.05616 | 0.71438 | 573.05616 | 0.81204 |
| 571.62709 | 0.68138 | 571.62709 | 0.84995 | 571.62709 | 0.70222 | 571.62709 | 0.8133  |
| 570.19802 | 0.655   | 570.19802 | 0.85171 | 570.19802 | 0.68693 | 570.19802 | 0.81453 |
| 568.76896 | 0.6157  | 568.76896 | 0.85372 | 568.76896 | 0.66601 | 568.76896 | 0.81587 |
| 567.33989 | 0.56374 | 567.33989 | 0.85533 | 567.33989 | 0.64009 | 567.33989 | 0.8174  |
| 565.91082 | 0.50754 | 565.91082 | 0.85638 | 565.91082 | 0.61275 | 565.91082 | 0.8189  |
| 564.48175 | 0.45808 | 564.48175 | 0.85696 | 564.48175 | 0.58844 | 564.48175 | 0.82017 |
| 563.05269 | 0.42223 | 563.05269 | 0.85724 | 563.05269 | 0.57011 | 563.05269 | 0.82127 |
| 561.62362 | 0.39995 | 561.62362 | 0.85735 | 561.62362 | 0.55781 | 561.62362 | 0.82238 |
| 560.19455 | 0.38659 | 560.19455 | 0.85744 | 560.19455 | 0.54947 | 560.19455 | 0.8236  |
| 558.76548 | 0.37802 | 558.76548 | 0.8579  | 558.76548 | 0.54314 | 558.76548 | 0.82488 |
| 557.33642 | 0.3736  | 557.33642 | 0.85911 | 557.33642 | 0.53864 | 557.33642 | 0.82633 |
| 555.90735 | 0.37549 | 555.90735 | 0.86106 | 555.90735 | 0.5373  | 555.90735 | 0.82809 |
| 554.47828 | 0.38637 | 554.47828 | 0.86353 | 554.47828 | 0.54078 | 554.47828 | 0.83013 |
| 553.04921 | 0.40741 | 553.04921 | 0.86646 | 553.04921 | 0.54963 | 553.04921 | 0.83223 |
| 551.62014 | 0.43772 | 551.62014 | 0.86976 | 551.62014 | 0.56287 | 551.62014 | 0.83419 |
| 550.19108 | 0.47482 | 550.19108 | 0.87332 | 550.19108 | 0.57879 | 550.19108 | 0.83601 |
| 548.76201 | 0.51523 | 548.76201 | 0.87711 | 548.76201 | 0.5958  | 548.76201 | 0.83784 |
| 547.33294 | 0.55506 | 547.33294 | 0.88089 | 547.33294 | 0.61243 | 547.33294 | 0.83983 |
| 545.90387 | 0.59087 | 545.90387 | 0.88436 | 545.90387 | 0.62713 | 545.90387 | 0.84201 |
| 544.47481 | 0.62025 | 544.47481 | 0.88735 | 544.47481 | 0.63848 | 544.47481 | 0.84429 |
| 543.04574 | 0.64209 | 543.04574 | 0.88968 | 543.04574 | 0.64595 | 543.04574 | 0.84645 |
| 541.61667 | 0.65688 | 541.61667 | 0.89129 | 541.61667 | 0.6502  | 541.61667 | 0.8483  |
| 540.1876  | 0.66619 | 540.1876  | 0.89233 | 540.1876  | 0.65247 | 540.1876  | 0.84988 |
| 538.75853 | 0.67145 | 538.75853 | 0.89285 | 538.75853 | 0.65357 | 538.75853 | 0.8514  |
| 537.32947 | 0.67361 | 537.32947 | 0.89297 | 537.32947 | 0.65363 | 537.32947 | 0.85299 |
| 535.9004  | 0.67314 | 535.9004  | 0.893   | 535.9004  | 0.65235 | 535.9004  | 0.85457 |
| 534.47133 | 0.66998 | 534.47133 | 0.89309 | 534.47133 | 0.64956 | 534.47133 | 0.85595 |
| 533.04226 | 0.66401 | 533.04226 | 0.89317 | 533.04226 | 0.64563 | 533.04226 | 0.85704 |
| 531.6132  | 0.65562 | 531.6132  | 0.89332 | 531.6132  | 0.64122 | 531.6132  | 0.85787 |
| 530.18413 | 0.6453  | 530.18413 | 0.89349 | 530.18413 | 0.63658 | 530.18413 | 0.85857 |
| 528.75506 | 0.63332 | 528.75506 | 0.89368 | 528.75506 | 0.63146 | 528.75506 | 0.85906 |

|           |         |           |         |           |         |           |         |
|-----------|---------|-----------|---------|-----------|---------|-----------|---------|
| 527.32599 | 0.61974 | 527.32599 | 0.8945  | 527.32599 | 0.62546 | 527.32599 | 0.8592  |
| 525.89692 | 0.60465 | 525.89692 | 0.89637 | 525.89692 | 0.61855 | 525.89692 | 0.85925 |
| 524.46786 | 0.5884  | 524.46786 | 0.89834 | 524.46786 | 0.61112 | 524.46786 | 0.85995 |
| 523.03879 | 0.57147 | 523.03879 | 0.89928 | 523.03879 | 0.60344 | 523.03879 | 0.86157 |
| 521.60972 | 0.55367 | 521.60972 | 0.89924 | 521.60972 | 0.59533 | 521.60972 | 0.86351 |
| 520.18065 | 0.53433 | 520.18065 | 0.89908 | 520.18065 | 0.58662 | 520.18065 | 0.86506 |
| 518.75159 | 0.51339 | 518.75159 | 0.89966 | 518.75159 | 0.57772 | 518.75159 | 0.86632 |
| 517.32252 | 0.49139 | 517.32252 | 0.90112 | 517.32252 | 0.56911 | 517.32252 | 0.86806 |
| 515.89345 | 0.46895 | 515.89345 | 0.90265 | 515.89345 | 0.56079 | 515.89345 | 0.87064 |
| 514.46438 | 0.44656 | 514.46438 | 0.90375 | 514.46438 | 0.55244 | 514.46438 | 0.87351 |
| 513.03532 | 0.42446 | 513.03532 | 0.9049  | 513.03532 | 0.54372 | 513.03532 | 0.87584 |
| 511.60625 | 0.40281 | 511.60625 | 0.90657 | 511.60625 | 0.5343  | 511.60625 | 0.87749 |
| 510.17718 | 0.38211 | 510.17718 | 0.90882 | 510.17718 | 0.52408 | 510.17718 | 0.87893 |
| 508.74811 | 0.36287 | 508.74811 | 0.91163 | 508.74811 | 0.51349 | 508.74811 | 0.88053 |
| 507.31904 | 0.34526 | 507.31904 | 0.91467 | 507.31904 | 0.50355 | 507.31904 | 0.88241 |
| 505.88998 | 0.32964 | 505.88998 | 0.91746 | 505.88998 | 0.49524 | 505.88998 | 0.88448 |
| 504.46091 | 0.31623 | 504.46091 | 0.91997 | 504.46091 | 0.4885  | 504.46091 | 0.88639 |
| 503.03184 | 0.30429 | 503.03184 | 0.92237 | 503.03184 | 0.48262 | 503.03184 | 0.8878  |
| 501.60277 | 0.29293 | 501.60277 | 0.92447 | 501.60277 | 0.47725 | 501.60277 | 0.88905 |
| 500.17371 | 0.28194 | 500.17371 | 0.92577 | 500.17371 | 0.47228 | 500.17371 | 0.89078 |
| 498.74464 | 0.27108 | 498.74464 | 0.92592 | 498.74464 | 0.46706 | 498.74464 | 0.89284 |
| 497.31557 | 0.25979 | 497.31557 | 0.92529 | 497.31557 | 0.46104 | 497.31557 | 0.89444 |
| 495.8865  | 0.24772 | 495.8865  | 0.92467 | 495.8865  | 0.45422 | 495.8865  | 0.89517 |
| 494.45743 | 0.23434 | 494.45743 | 0.92442 | 494.45743 | 0.44639 | 494.45743 | 0.89545 |
| 493.02837 | 0.21899 | 493.02837 | 0.92461 | 493.02837 | 0.43688 | 493.02837 | 0.89593 |
| 491.5993  | 0.20166 | 491.5993  | 0.9257  | 491.5993  | 0.4255  | 491.5993  | 0.8967  |
| 490.17023 | 0.18306 | 490.17023 | 0.92764 | 490.17023 | 0.41247 | 490.17023 | 0.89719 |
| 488.74116 | 0.16393 | 488.74116 | 0.92978 | 488.74116 | 0.39751 | 488.74116 | 0.89683 |
| 487.3121  | 0.14475 | 487.3121  | 0.932   | 487.3121  | 0.38035 | 487.3121  | 0.89557 |
| 485.88303 | 0.12592 | 485.88303 | 0.93458 | 485.88303 | 0.3618  | 485.88303 | 0.89367 |
| 484.45396 | 0.10835 | 484.45396 | 0.93737 | 484.45396 | 0.34361 | 484.45396 | 0.89138 |
| 483.02489 | 0.09376 | 483.02489 | 0.9401  | 483.02489 | 0.32753 | 483.02489 | 0.88914 |
| 481.59583 | 0.08375 | 481.59583 | 0.94236 | 481.59583 | 0.31499 | 481.59583 | 0.88754 |
| 480.16676 | 0.07915 | 480.16676 | 0.94366 | 480.16676 | 0.30786 | 480.16676 | 0.8868  |
| 478.73769 | 0.08052 | 478.73769 | 0.94421 | 478.73769 | 0.3083  | 478.73769 | 0.88668 |
| 477.30862 | 0.08814 | 477.30862 | 0.94425 | 477.30862 | 0.31696 | 477.30862 | 0.88689 |
| 475.87955 | 0.1014  | 475.87955 | 0.94343 | 475.87955 | 0.33208 | 475.87955 | 0.88736 |
| 474.45049 | 0.11999 | 474.45049 | 0.94242 | 474.45049 | 0.35164 | 474.45049 | 0.88827 |
| 473.02142 | 0.14418 | 473.02142 | 0.94271 | 473.02142 | 0.37455 | 473.02142 | 0.89017 |
| 471.59235 | 0.17244 | 471.59235 | 0.94405 | 471.59235 | 0.39861 | 471.59235 | 0.89377 |
| 470.16328 | 0.20178 | 470.16328 | 0.94522 | 470.16328 | 0.42126 | 470.16328 | 0.89922 |
| 468.73422 | 0.23158 | 468.73422 | 0.94648 | 468.73422 | 0.44262 | 468.73422 | 0.90581 |
| 467.30515 | 0.26257 | 467.30515 | 0.94831 | 467.30515 | 0.46391 | 467.30515 | 0.91244 |
| 465.87608 | 0.29407 | 465.87608 | 0.95034 | 465.87608 | 0.48456 | 465.87608 | 0.91828 |
| 464.44701 | 0.32512 | 464.44701 | 0.9523  | 464.44701 | 0.5033  | 464.44701 | 0.92305 |
| 463.01794 | 0.35528 | 463.01794 | 0.95373 | 463.01794 | 0.52007 | 463.01794 | 0.92701 |
| 461.58888 | 0.38386 | 461.58888 | 0.95428 | 461.58888 | 0.53553 | 461.58888 | 0.93036 |
| 460.15981 | 0.41094 | 460.15981 | 0.95458 | 460.15981 | 0.55053 | 460.15981 | 0.93302 |
| 458.73074 | 0.43756 | 458.73074 | 0.95544 | 458.73074 | 0.56597 | 458.73074 | 0.93534 |
| 457.30167 | 0.46263 | 457.30167 | 0.95655 | 457.30167 | 0.5813  | 457.30167 | 0.93847 |
| 455.87261 | 0.48253 | 455.87261 | 0.95711 | 455.87261 | 0.59436 | 455.87261 | 0.94288 |
| 454.44354 | 0.49525 | 454.44354 | 0.95684 | 454.44354 | 0.60409 | 454.44354 | 0.94745 |
| 453.01447 | 0.50093 | 453.01447 | 0.95629 | 453.01447 | 0.61086 | 453.01447 | 0.95105 |
| 451.5854  | 0.50004 | 451.5854  | 0.95643 | 451.5854  | 0.61459 | 451.5854  | 0.95368 |

|           |         |           |         |           |         |           |         |
|-----------|---------|-----------|---------|-----------|---------|-----------|---------|
| 450.15634 | 0.49349 | 450.15634 | 0.95719 | 450.15634 | 0.61481 | 450.15634 | 0.95576 |
| 448.72727 | 0.48326 | 448.72727 | 0.95798 | 448.72727 | 0.61185 | 448.72727 | 0.95738 |
| 447.2982  | 0.47297 | 447.2982  | 0.95929 | 447.2982  | 0.60731 | 447.2982  | 0.95847 |
| 445.86913 | 0.46709 | 445.86913 | 0.96141 | 445.86913 | 0.60377 | 445.86913 | 0.95919 |
| 444.44006 | 0.4695  | 444.44006 | 0.96351 | 444.44006 | 0.60391 | 444.44006 | 0.95976 |
| 443.011   | 0.48311 | 443.011   | 0.96562 | 443.011   | 0.60939 | 443.011   | 0.96047 |
| 441.58193 | 0.50797 | 441.58193 | 0.96792 | 441.58193 | 0.62007 | 441.58193 | 0.96174 |
| 440.15286 | 0.54005 | 440.15286 | 0.96901 | 440.15286 | 0.63446 | 440.15286 | 0.96336 |
| 438.72379 | 0.57581 | 438.72379 | 0.96852 | 438.72379 | 0.6516  | 438.72379 | 0.96448 |
| 437.29473 | 0.61451 | 437.29473 | 0.96795 | 437.29473 | 0.67121 | 437.29473 | 0.96457 |
| 435.86566 | 0.65438 | 435.86566 | 0.96786 | 435.86566 | 0.69234 | 435.86566 | 0.96419 |
| 434.43659 | 0.69189 | 434.43659 | 0.96788 | 434.43659 | 0.71334 | 434.43659 | 0.96427 |
| 433.00752 | 0.72548 | 433.00752 | 0.96817 | 433.00752 | 0.73342 | 433.00752 | 0.96492 |
| 431.57845 | 0.75558 | 431.57845 | 0.96871 | 431.57845 | 0.75291 | 431.57845 | 0.9653  |
| 430.14939 | 0.78271 | 430.14939 | 0.96936 | 430.14939 | 0.772   | 430.14939 | 0.9646  |
| 428.72032 | 0.80715 | 428.72032 | 0.97051 | 428.72032 | 0.79005 | 428.72032 | 0.9627  |
| 427.29125 | 0.82883 | 427.29125 | 0.97188 | 427.29125 | 0.8064  | 427.29125 | 0.96    |
| 425.86218 | 0.84798 | 425.86218 | 0.97318 | 425.86218 | 0.82142 | 425.86218 | 0.95686 |
| 424.43312 | 0.86539 | 424.43312 | 0.97509 | 424.43312 | 0.83554 | 424.43312 | 0.95372 |
| 423.00405 | 0.88082 | 423.00405 | 0.97722 | 423.00405 | 0.84798 | 423.00405 | 0.95077 |
| 421.57498 | 0.89384 | 421.57498 | 0.97872 | 421.57498 | 0.85854 | 421.57498 | 0.9472  |
| 420.14591 | 0.90652 | 420.14591 | 0.98128 | 420.14591 | 0.87002 | 420.14591 | 0.94201 |
| 418.71685 | 0.91992 | 418.71685 | 0.98598 | 418.71685 | 0.88522 | 418.71685 | 0.93701 |
| 417.28778 | 0.93035 | 417.28778 | 0.98882 | 417.28778 | 0.90057 | 417.28778 | 0.93632 |
| 415.85871 | 0.93706 | 415.85871 | 0.98836 | 415.85871 | 0.91193 | 415.85871 | 0.93998 |
| 414.42964 | 0.94276 | 414.42964 | 0.98699 | 414.42964 | 0.92073 | 414.42964 | 0.94474 |
| 413.00057 | 0.94828 | 413.00057 | 0.98586 | 413.00057 | 0.92895 | 413.00057 | 0.9488  |
| 411.57151 | 0.95371 | 411.57151 | 0.98569 | 411.57151 | 0.93643 | 411.57151 | 0.95253 |
| 410.14244 | 0.95937 | 410.14244 | 0.9873  | 410.14244 | 0.94282 | 410.14244 | 0.95691 |
| 408.71337 | 0.96445 | 408.71337 | 0.98988 | 408.71337 | 0.94909 | 408.71337 | 0.96227 |
| 407.2843  | 0.9681  | 407.2843  | 0.99229 | 407.2843  | 0.95614 | 407.2843  | 0.96831 |
| 405.85524 | 0.97082 | 405.85524 | 0.99432 | 405.85524 | 0.9633  | 405.85524 | 0.97466 |
| 404.42617 | 0.97334 | 404.42617 | 0.99567 | 404.42617 | 0.96935 | 404.42617 | 0.98106 |
| 402.9971  | 0.97678 | 402.9971  | 0.99644 | 402.9971  | 0.97414 | 402.9971  | 0.98714 |
| 401.56803 | 0.98258 | 401.56803 | 0.99754 | 401.56803 | 0.9791  | 401.56803 | 0.99227 |
| 400.13896 | 0.99055 | 400.13896 | 0.99879 | 400.13896 | 0.98692 | 400.13896 | 0.99619 |
| 398.7099  | 1       | 398.7099  | 1       | 398.7099  | 1       | 398.7099  | 1       |

## H3B03

|            |         |
|------------|---------|
| 3998.53151 | 0.9686  |
| 3997.10244 | 0.96991 |
| 3995.67338 | 0.97083 |
| 3994.24431 | 0.97143 |
| 3992.81524 | 0.9719  |
| 3991.38617 | 0.97251 |
| 3989.9571  | 0.9736  |
| 3988.52804 | 0.9752  |
| 3987.09897 | 0.9768  |
| 3985.6699  | 0.97784 |
| 3984.24083 | 0.97841 |
| 3982.81177 | 0.97908 |
| 3981.3827  | 0.98019 |
| 3979.95363 | 0.98165 |
| 3978.52456 | 0.98303 |
| 3977.0955  | 0.98404 |
| 3975.66643 | 0.98481 |
| 3974.23736 | 0.98573 |
| 3972.80829 | 0.98678 |
| 3971.37922 | 0.98764 |
| 3969.95016 | 0.98824 |
| 3968.52109 | 0.98884 |
| 3967.09202 | 0.98954 |
| 3965.66295 | 0.99018 |
| 3964.23389 | 0.99071 |
| 3962.80482 | 0.9914  |
| 3961.37575 | 0.99245 |
| 3959.94668 | 0.99362 |
| 3958.51761 | 0.99454 |
| 3957.08855 | 0.99513 |
| 3955.65948 | 0.99554 |
| 3954.23041 | 0.99582 |
| 3952.80134 | 0.99596 |
| 3951.37228 | 0.99601 |
| 3949.94321 | 0.99634 |
| 3948.51414 | 0.99737 |
| 3947.08507 | 0.9988  |
| 3945.65601 | 0.99972 |
| 3944.22694 | 1       |
| 3942.79787 | 1.00051 |
| 3941.3688  | 1.0017  |
| 3939.93973 | 1.00285 |
| 3938.51067 | 1.00324 |
| 3937.0816  | 1.0029  |
| 3935.65253 | 1.00213 |
| 3934.22346 | 1.00139 |
| 3932.7944  | 1.00144 |
| 3931.36533 | 1.00272 |
| 3929.93626 | 1.00434 |
| 3928.50719 | 1.00484 |
| 3927.07812 | 1.00404 |
| 3925.64906 | 1.00325 |
| 3924.21999 | 1.00369 |



|            |         |
|------------|---------|
| 3922.79092 | 1.00489 |
| 3921.36185 | 1.00535 |
| 3919.93279 | 1.00463 |
| 3918.50372 | 1.00402 |
| 3917.07465 | 1.00491 |
| 3915.64558 | 1.00683 |
| 3914.21651 | 1.00799 |
| 3912.78745 | 1.00761 |
| 3911.35838 | 1.00652 |
| 3909.92931 | 1.00545 |
| 3908.50024 | 1.00386 |
| 3907.07118 | 1.00112 |
| 3905.64211 | 0.99815 |
| 3904.21304 | 0.99704 |
| 3902.78397 | 0.99855 |
| 3901.35491 | 1.0012  |
| 3899.92584 | 1.0036  |
| 3898.49677 | 1.00554 |
| 3897.0677  | 1.00643 |
| 3895.63863 | 1.00531 |
| 3894.20957 | 1.00237 |
| 3892.7805  | 0.99963 |
| 3891.35143 | 0.99931 |
| 3889.92236 | 1.00052 |
| 3888.4933  | 1       |
| 3887.06423 | 0.9985  |
| 3885.63516 | 0.99823 |
| 3884.20609 | 1.00029 |
| 3882.77702 | 1.00175 |
| 3881.34796 | 1.0018  |
| 3879.91889 | 1.00309 |
| 3878.48982 | 1.00539 |
| 3877.06075 | 1.00527 |
| 3875.63169 | 1.00231 |
| 3874.20262 | 0.99927 |
| 3872.77355 | 0.99758 |
| 3871.34448 | 0.99686 |
| 3869.91542 | 0.9979  |
| 3868.48635 | 1.00086 |
| 3867.05728 | 1.00286 |
| 3865.62821 | 1.0024  |
| 3864.19914 | 1.00191 |
| 3862.77008 | 1.00363 |
| 3861.34101 | 1.00602 |
| 3859.91194 | 1.00636 |
| 3858.48287 | 1.00362 |
| 3857.05381 | 0.99798 |
| 3855.62474 | 0.99121 |
| 3854.19567 | 0.98885 |
| 3852.7666  | 0.99658 |
| 3851.33753 | 1.00764 |
| 3849.90847 | 1.01195 |
| 3848.4794  | 1.00979 |
| 3847.05033 | 1.00505 |

|            |         |
|------------|---------|
| 3845.62126 | 1.0004  |
| 3844.1922  | 0.99719 |
| 3842.76313 | 0.99544 |
| 3841.33406 | 0.99403 |
| 3839.90499 | 0.99262 |
| 3838.47593 | 0.99299 |
| 3837.04686 | 0.99628 |
| 3835.61779 | 0.99993 |
| 3834.18872 | 1.001   |
| 3832.75965 | 1       |
| 3831.33059 | 1.00016 |
| 3829.90152 | 1.00063 |
| 3828.47245 | 1.00064 |
| 3827.04338 | 1.00029 |
| 3825.61432 | 0.99972 |
| 3824.18525 | 0.99786 |
| 3822.75618 | 0.99508 |
| 3821.32711 | 0.99513 |
| 3819.89804 | 0.99946 |
| 3818.46898 | 1.00311 |
| 3817.03991 | 1.00381 |
| 3815.61084 | 1.00525 |
| 3814.18177 | 1.00881 |
| 3812.75271 | 1.01067 |
| 3811.32364 | 1.00856 |
| 3809.89457 | 1.00413 |
| 3808.4655  | 1.00069 |
| 3807.03644 | 1.0009  |
| 3805.60737 | 1.00322 |
| 3804.1783  | 1.00319 |
| 3802.74923 | 1.00104 |
| 3801.32016 | 1.0017  |
| 3799.8911  | 1.00611 |
| 3798.46203 | 1.00914 |
| 3797.03296 | 1.00912 |
| 3795.60389 | 1.00877 |
| 3794.17483 | 1.00909 |
| 3792.74576 | 1.00879 |
| 3791.31669 | 1.00763 |
| 3789.88762 | 1.00653 |
| 3788.45855 | 1.00562 |
| 3787.02949 | 1.00446 |
| 3785.60042 | 1.00334 |
| 3784.17135 | 1.00269 |
| 3782.74228 | 1.00169 |
| 3781.31322 | 0.99971 |
| 3779.88415 | 0.99812 |
| 3778.45508 | 0.99857 |
| 3777.02601 | 1       |
| 3775.59695 | 1.00168 |
| 3774.16788 | 1.00119 |
| 3772.73881 | 0.99906 |
| 3771.30974 | 0.99695 |
| 3769.88067 | 0.99683 |

|            |         |
|------------|---------|
| 3768.45161 | 0.99903 |
| 3767.02254 | 1.00177 |
| 3765.59347 | 1.00393 |
| 3764.1644  | 1.00534 |
| 3762.73534 | 1.00525 |
| 3761.30627 | 1.00334 |
| 3759.8772  | 1.00135 |
| 3758.44813 | 1.00141 |
| 3757.01906 | 1.00284 |
| 3755.59    | 1.00283 |
| 3754.16093 | 1.00001 |
| 3752.73186 | 0.99602 |
| 3751.30279 | 0.99519 |
| 3749.87373 | 0.99957 |
| 3748.44466 | 1.00351 |
| 3747.01559 | 1.00205 |
| 3745.58652 | 0.99866 |
| 3744.15745 | 1.00047 |
| 3742.72839 | 1.007   |
| 3741.29932 | 1.00971 |
| 3739.87025 | 1.00593 |
| 3738.44118 | 0.99918 |
| 3737.01212 | 0.99391 |
| 3735.58305 | 0.99328 |
| 3734.15398 | 0.99741 |
| 3732.72491 | 1.0031  |
| 3731.29585 | 1.00664 |
| 3729.86678 | 1.00657 |
| 3728.43771 | 1.004   |
| 3727.00864 | 1.00081 |
| 3725.57957 | 0.99899 |
| 3724.15051 | 0.99879 |
| 3722.72144 | 0.99919 |
| 3721.29237 | 0.99971 |
| 3719.8633  | 1.00022 |
| 3718.43424 | 1       |
| 3717.00517 | 0.99838 |
| 3715.5761  | 0.99475 |
| 3714.14703 | 0.98968 |
| 3712.71796 | 0.98557 |
| 3711.2889  | 0.98557 |
| 3709.85983 | 0.98918 |
| 3708.43076 | 0.99211 |
| 3707.00169 | 0.99185 |
| 3705.57263 | 0.98873 |
| 3704.14356 | 0.98437 |
| 3702.71449 | 0.98127 |
| 3701.28542 | 0.981   |
| 3699.85636 | 0.98187 |
| 3698.42729 | 0.98094 |
| 3696.99822 | 0.97764 |
| 3695.56915 | 0.97314 |
| 3694.14008 | 0.96807 |
| 3692.71102 | 0.96219 |

|            |         |
|------------|---------|
| 3691.28195 | 0.95628 |
| 3689.85288 | 0.95315 |
| 3688.42381 | 0.95436 |
| 3686.99475 | 0.95638 |
| 3685.56568 | 0.95503 |
| 3684.13661 | 0.95021 |
| 3682.70754 | 0.94378 |
| 3681.27847 | 0.93696 |
| 3679.84941 | 0.92963 |
| 3678.42034 | 0.92112 |
| 3676.99127 | 0.91262 |
| 3675.5622  | 0.90777 |
| 3674.13314 | 0.90682 |
| 3672.70407 | 0.90407 |
| 3671.275   | 0.89743 |
| 3669.84593 | 0.89091 |
| 3668.41687 | 0.88763 |
| 3666.9878  | 0.8848  |
| 3665.55873 | 0.87921 |
| 3664.12966 | 0.87137 |
| 3662.70059 | 0.8631  |
| 3661.27153 | 0.85537 |
| 3659.84246 | 0.84797 |
| 3658.41339 | 0.84042 |
| 3656.98432 | 0.83288 |
| 3655.55526 | 0.82574 |
| 3654.12619 | 0.8181  |
| 3652.69712 | 0.80828 |
| 3651.26805 | 0.7964  |
| 3649.83898 | 0.7851  |
| 3648.40992 | 0.77712 |
| 3646.98085 | 0.77129 |
| 3645.55178 | 0.76486 |
| 3644.12271 | 0.75743 |
| 3642.69365 | 0.74998 |
| 3641.26458 | 0.74359 |
| 3639.83551 | 0.73861 |
| 3638.40644 | 0.73423 |
| 3636.97738 | 0.72917 |
| 3635.54831 | 0.72287 |
| 3634.11924 | 0.71578 |
| 3632.69017 | 0.70829 |
| 3631.2611  | 0.70005 |
| 3629.83204 | 0.69127 |
| 3628.40297 | 0.68427 |
| 3626.9739  | 0.68025 |
| 3625.54483 | 0.67642 |
| 3624.11577 | 0.67035 |
| 3622.6867  | 0.66212 |
| 3621.25763 | 0.65287 |
| 3619.82856 | 0.64417 |
| 3618.39949 | 0.63728 |
| 3616.97043 | 0.63151 |
| 3615.54136 | 0.62511 |

|            |         |
|------------|---------|
| 3614.11229 | 0.61804 |
| 3612.68322 | 0.6115  |
| 3611.25416 | 0.60563 |
| 3609.82509 | 0.5995  |
| 3608.39602 | 0.59285 |
| 3606.96695 | 0.58631 |
| 3605.53789 | 0.57998 |
| 3604.10882 | 0.57333 |
| 3602.67975 | 0.56613 |
| 3601.25068 | 0.55883 |
| 3599.82161 | 0.55174 |
| 3598.39255 | 0.54445 |
| 3596.96348 | 0.53659 |
| 3595.53441 | 0.52849 |
| 3594.10534 | 0.52086 |
| 3592.67628 | 0.51419 |
| 3591.24721 | 0.50815 |
| 3589.81814 | 0.50193 |
| 3588.38907 | 0.49528 |
| 3586.96    | 0.48882 |
| 3585.53094 | 0.48282 |
| 3584.10187 | 0.47671 |
| 3582.6728  | 0.47021 |
| 3581.24373 | 0.46348 |
| 3579.81467 | 0.45665 |
| 3578.3856  | 0.45002 |
| 3576.95653 | 0.44387 |
| 3575.52746 | 0.43783 |
| 3574.09839 | 0.4312  |
| 3572.66933 | 0.424   |
| 3571.24026 | 0.41683 |
| 3569.81119 | 0.40991 |
| 3568.38212 | 0.40279 |
| 3566.95306 | 0.39526 |
| 3565.52399 | 0.38801 |
| 3564.09492 | 0.38159 |
| 3562.66585 | 0.3756  |
| 3561.23679 | 0.36959 |
| 3559.80772 | 0.36359 |
| 3558.37865 | 0.35768 |
| 3556.94958 | 0.3518  |
| 3555.52051 | 0.34587 |
| 3554.09145 | 0.33983 |
| 3552.66238 | 0.33359 |
| 3551.23331 | 0.32736 |
| 3549.80424 | 0.32139 |
| 3548.37518 | 0.3156  |
| 3546.94611 | 0.30968 |
| 3545.51704 | 0.30348 |
| 3544.08797 | 0.29713 |
| 3542.6589  | 0.29095 |
| 3541.22984 | 0.28522 |
| 3539.80077 | 0.27995 |
| 3538.3717  | 0.27483 |

|            |         |
|------------|---------|
| 3536.94263 | 0.26947 |
| 3535.51357 | 0.26379 |
| 3534.0845  | 0.25805 |
| 3532.65543 | 0.25248 |
| 3531.22636 | 0.24701 |
| 3529.7973  | 0.24163 |
| 3528.36823 | 0.23658 |
| 3526.93916 | 0.23207 |
| 3525.51009 | 0.22815 |
| 3524.08102 | 0.22464 |
| 3522.65196 | 0.22117 |
| 3521.22289 | 0.21718 |
| 3519.79382 | 0.21243 |
| 3518.36475 | 0.20712 |
| 3516.93569 | 0.20176 |
| 3515.50662 | 0.19691 |
| 3514.07755 | 0.19282 |
| 3512.64848 | 0.18924 |
| 3511.21941 | 0.1857  |
| 3509.79035 | 0.18179 |
| 3508.36128 | 0.17752 |
| 3506.93221 | 0.17334 |
| 3505.50314 | 0.16965 |
| 3504.07408 | 0.16643 |
| 3502.64501 | 0.16331 |
| 3501.21594 | 0.15988 |
| 3499.78687 | 0.156   |
| 3498.35781 | 0.15199 |
| 3496.92874 | 0.14824 |
| 3495.49967 | 0.14489 |
| 3494.0706  | 0.14183 |
| 3492.64153 | 0.13898 |
| 3491.21247 | 0.13618 |
| 3489.7834  | 0.13314 |
| 3488.35433 | 0.12964 |
| 3486.92526 | 0.12585 |
| 3485.4962  | 0.12221 |
| 3484.06713 | 0.11894 |
| 3482.63806 | 0.11597 |
| 3481.20899 | 0.11324 |
| 3479.77992 | 0.11086 |
| 3478.35086 | 0.1087  |
| 3476.92179 | 0.10617 |
| 3475.49272 | 0.1029  |
| 3474.06365 | 0.09943 |
| 3472.63459 | 0.09664 |
| 3471.20552 | 0.09458 |
| 3469.77645 | 0.09237 |
| 3468.34738 | 0.08939 |
| 3466.91832 | 0.08593 |
| 3465.48925 | 0.08264 |
| 3464.06018 | 0.07977 |
| 3462.63111 | 0.07725 |
| 3461.20204 | 0.075   |

|            |         |
|------------|---------|
| 3459.77298 | 0.07298 |
| 3458.34391 | 0.0711  |
| 3456.91484 | 0.06931 |
| 3455.48577 | 0.06757 |
| 3454.05671 | 0.06571 |
| 3452.62764 | 0.06357 |
| 3451.19857 | 0.06117 |
| 3449.7695  | 0.05866 |
| 3448.34043 | 0.0563  |
| 3446.91137 | 0.05439 |
| 3445.4823  | 0.05308 |
| 3444.05323 | 0.052   |
| 3442.62416 | 0.05057 |
| 3441.1951  | 0.04864 |
| 3439.76603 | 0.04652 |
| 3438.33696 | 0.0445  |
| 3436.90789 | 0.04275 |
| 3435.47883 | 0.04139 |
| 3434.04976 | 0.04038 |
| 3432.62069 | 0.03944 |
| 3431.19162 | 0.03829 |
| 3429.76255 | 0.0369  |
| 3428.33349 | 0.03532 |
| 3426.90442 | 0.03365 |
| 3425.47535 | 0.03207 |
| 3424.04628 | 0.03081 |
| 3422.61722 | 0.02993 |
| 3421.18815 | 0.02914 |
| 3419.75908 | 0.02812 |
| 3418.33001 | 0.02692 |
| 3416.90094 | 0.02577 |
| 3415.47188 | 0.02473 |
| 3414.04281 | 0.02388 |
| 3412.61374 | 0.02327 |
| 3411.18467 | 0.02264 |
| 3409.75561 | 0.0218  |
| 3408.32654 | 0.02102 |
| 3406.89747 | 0.02044 |
| 3405.4684  | 0.01975 |
| 3404.03934 | 0.01888 |
| 3402.61027 | 0.01824 |
| 3401.1812  | 0.01792 |
| 3399.75213 | 0.01763 |
| 3398.32306 | 0.01719 |
| 3396.894   | 0.01672 |
| 3395.46493 | 0.01648 |
| 3394.03586 | 0.01651 |
| 3392.60679 | 0.01622 |
| 3391.17773 | 0.01506 |
| 3389.74866 | 0.0131  |
| 3388.31959 | 0.01092 |
| 3386.89052 | 0.0093  |
| 3385.46145 | 0.00869 |
| 3384.03239 | 0.00885 |

|            |         |
|------------|---------|
| 3382.60332 | 0.00912 |
| 3381.17425 | 0.00908 |
| 3379.74518 | 0.00898 |
| 3378.31612 | 0.00918 |
| 3376.88705 | 0.00948 |
| 3375.45798 | 0.00934 |
| 3374.02891 | 0.00871 |
| 3372.59984 | 0.00807 |
| 3371.17078 | 0.00778 |
| 3369.74171 | 0.00772 |
| 3368.31264 | 0.00738 |
| 3366.88357 | 0.00641 |
| 3365.45451 | 0.00513 |
| 3364.02544 | 0.00415 |
| 3362.59637 | 0.0036  |
| 3361.1673  | 0.00339 |
| 3359.73824 | 0.00336 |
| 3358.30917 | 0.00326 |
| 3356.8801  | 0.0031  |
| 3355.45103 | 0.00329 |
| 3354.02196 | 0.004   |
| 3352.5929  | 0.00464 |
| 3351.16383 | 0.00475 |
| 3349.73476 | 0.00431 |
| 3348.30569 | 0.00363 |
| 3346.87663 | 0.00324 |
| 3345.44756 | 0.0032  |
| 3344.01849 | 0.00303 |
| 3342.58942 | 0.00297 |
| 3341.16035 | 0.00283 |
| 3339.73129 | 0.0022  |
| 3338.30222 | 0.00151 |
| 3336.87315 | 0.00141 |
| 3335.44408 | 0.00127 |
| 3334.01502 | 0.00167 |
| 3332.58595 | 0.00209 |
| 3331.15688 | 0.00188 |
| 3329.72781 | 0.00153 |
| 3328.29875 | 0.0016  |
| 3326.86968 | 0.00186 |
| 3325.44061 | 0.00215 |
| 3324.01154 | 0.00238 |
| 3322.58247 | 0.0025  |
| 3321.15341 | 0.00239 |
| 3319.72434 | 0.00217 |
| 3318.29527 | 0.00187 |
| 3316.8662  | 0.00154 |
| 3315.43714 | 0.00144 |
| 3314.00807 | 0.00206 |
| 3312.579   | 0.0025  |
| 3311.14993 | 0.00253 |
| 3309.72086 | 0.00238 |
| 3308.2918  | 0.00215 |
| 3306.86273 | 0.00176 |



|            |         |
|------------|---------|
| 3305.43366 | 0.00101 |
| 3304.00459 | 0.00119 |
| 3302.57553 | 0.00148 |
| 3301.14646 | 0.00143 |
| 3299.71739 | 0.00083 |
| 3298.28832 | 0.00101 |
| 3296.85926 | 0.00141 |
| 3295.43019 | 0.00164 |
| 3294.00112 | 0.0017  |
| 3292.57205 | 0.00181 |
| 3291.14298 | 0.00208 |
| 3289.71392 | 0.00204 |
| 3288.28485 | 0.00173 |
| 3286.85578 | 0.00106 |
| 3285.42671 | 0.00088 |
| 3283.99765 | 0.00099 |
| 3282.56858 | 0.00105 |
| 3281.13951 | 0.00108 |
| 3279.71044 | 0.0009  |
| 3278.28137 | 0.00127 |
| 3276.85231 | 0.00216 |
| 3275.42324 | 0.00282 |
| 3273.99417 | 0.00302 |
| 3272.5651  | 0.00278 |
| 3271.13604 | 0.00223 |
| 3269.70697 | 0.00192 |
| 3268.2779  | 0.00183 |
| 3266.84883 | 0.00182 |
| 3265.41977 | 0.002   |
| 3263.9907  | 0.002   |
| 3262.56163 | 0.00166 |
| 3261.13256 | 0.00138 |
| 3259.70349 | 0.00164 |
| 3258.27443 | 0.00182 |
| 3256.84536 | 0.00163 |
| 3255.41629 | 0.00156 |
| 3253.98722 | 0.00177 |
| 3252.55816 | 0.0017  |
| 3251.12909 | 0.00125 |
| 3249.70002 | 0.00067 |
| 3248.27095 | 0.00058 |
| 3246.84188 | 0.00102 |
| 3245.41282 | 0.00202 |
| 3243.98375 | 0.00281 |
| 3242.55468 | 0.00291 |
| 3241.12561 | 0.00255 |
| 3239.69655 | 0.00219 |
| 3238.26748 | 0.00185 |
| 3236.83841 | 0.00166 |
| 3235.40934 | 0.00153 |
| 3233.98028 | 0.00144 |
| 3232.55121 | 0.00136 |
| 3231.12214 | 0.00128 |
| 3229.69307 | 0.00144 |

|            |         |
|------------|---------|
| 3228.264   | 0.00156 |
| 3226.83494 | 0.00172 |
| 3225.40587 | 0.00185 |
| 3223.9768  | 0.002   |
| 3222.54773 | 0.00208 |
| 3221.11867 | 0.0019  |
| 3219.6896  | 0.00197 |
| 3218.26053 | 0.00214 |
| 3216.83146 | 0.00242 |
| 3215.40239 | 0.00259 |
| 3213.97333 | 0.0022  |
| 3212.54426 | 0.00167 |
| 3211.11519 | 0.0015  |
| 3209.68612 | 0.00155 |
| 3208.25706 | 0.0013  |
| 3206.82799 | 0.00112 |
| 3205.39892 | 0.00122 |
| 3203.96985 | 0.00132 |
| 3202.54078 | 0.00192 |
| 3201.11172 | 0.0025  |
| 3199.68265 | 0.00262 |
| 3198.25358 | 0.0027  |
| 3196.82451 | 0.0026  |
| 3195.39545 | 0.00191 |
| 3193.96638 | 0.00098 |
| 3192.53731 | 0.00146 |
| 3191.10824 | 0.00191 |
| 3189.67918 | 0.00209 |
| 3188.25011 | 0.00203 |
| 3186.82104 | 0.00167 |
| 3185.39197 | 0.00113 |
| 3183.9629  | 0.00127 |
| 3182.53384 | 0.00173 |
| 3181.10477 | 0.00209 |
| 3179.6757  | 0.00247 |
| 3178.24663 | 0.00268 |
| 3176.81757 | 0.00268 |
| 3175.3885  | 0.0027  |
| 3173.95943 | 0.00268 |
| 3172.53036 | 0.0026  |
| 3171.10129 | 0.00253 |
| 3169.67223 | 0.00212 |
| 3168.24316 | 0.0013  |
| 3166.81409 | 0.00105 |
| 3165.38502 | 0.00124 |
| 3163.95596 | 0.00132 |
| 3162.52689 | 0.00151 |
| 3161.09782 | 0.00186 |
| 3159.66875 | 0.00222 |
| 3158.23969 | 0.00227 |
| 3156.81062 | 0.00196 |
| 3155.38155 | 0.0018  |
| 3153.95248 | 0.00198 |
| 3152.52341 | 0.00231 |

|            |         |
|------------|---------|
| 3151.09435 | 0.00243 |
| 3149.66528 | 0.00229 |
| 3148.23621 | 0.00198 |
| 3146.80714 | 0.00174 |
| 3145.37808 | 0.00167 |
| 3143.94901 | 0.0015  |
| 3142.51994 | 0.00102 |
| 3141.09087 | 0.00085 |
| 3139.6618  | 0.00087 |
| 3138.23274 | 0.00085 |
| 3136.80367 | 0.00104 |
| 3135.3746  | 0.00112 |
| 3133.94553 | 0.00109 |
| 3132.51647 | 0.00097 |
| 3131.0874  | 0.00152 |
| 3129.65833 | 0.00226 |
| 3128.22926 | 0.00259 |
| 3126.8002  | 0.00236 |
| 3125.37113 | 0.00197 |
| 3123.94206 | 0.0019  |
| 3122.51299 | 0.00222 |
| 3121.08392 | 0.00264 |
| 3119.65486 | 0.00282 |
| 3118.22579 | 0.0026  |
| 3116.79672 | 0.00214 |
| 3115.36765 | 0.00182 |
| 3113.93859 | 0.00175 |
| 3112.50952 | 0.00185 |
| 3111.08045 | 0.00204 |
| 3109.65138 | 0.00236 |
| 3108.22231 | 0.00293 |
| 3106.79325 | 0.00366 |
| 3105.36418 | 0.00426 |
| 3103.93511 | 0.00445 |
| 3102.50604 | 0.00429 |
| 3101.07698 | 0.00423 |
| 3099.64791 | 0.00459 |
| 3098.21884 | 0.00543 |
| 3096.78977 | 0.00657 |
| 3095.36071 | 0.00777 |
| 3093.93164 | 0.00877 |
| 3092.50257 | 0.00946 |
| 3091.0735  | 0.01    |
| 3089.64443 | 0.01064 |
| 3088.21537 | 0.0115  |
| 3086.7863  | 0.01273 |
| 3085.35723 | 0.01434 |
| 3083.92816 | 0.01611 |
| 3082.4991  | 0.0177  |
| 3081.07003 | 0.01912 |
| 3079.64096 | 0.02063 |
| 3078.21189 | 0.02237 |
| 3076.78282 | 0.02424 |
| 3075.35376 | 0.0262  |

|            |         |
|------------|---------|
| 3073.92469 | 0.02836 |
| 3072.49562 | 0.03075 |
| 3071.06655 | 0.03322 |
| 3069.63749 | 0.0356  |
| 3068.20842 | 0.03786 |
| 3066.77935 | 0.04007 |
| 3065.35028 | 0.04241 |
| 3063.92122 | 0.04504 |
| 3062.49215 | 0.04801 |
| 3061.06308 | 0.0512  |
| 3059.63401 | 0.05456 |
| 3058.20494 | 0.05816 |
| 3056.77588 | 0.06186 |
| 3055.34681 | 0.06536 |
| 3053.91774 | 0.06863 |
| 3052.48867 | 0.07204 |
| 3051.05961 | 0.07594 |
| 3049.63054 | 0.08035 |
| 3048.20147 | 0.08501 |
| 3046.7724  | 0.08962 |
| 3045.34333 | 0.09414 |
| 3043.91427 | 0.09869 |
| 3042.4852  | 0.10336 |
| 3041.05613 | 0.10817 |
| 3039.62706 | 0.11313 |
| 3038.198   | 0.11825 |
| 3036.76893 | 0.12351 |
| 3035.33986 | 0.12892 |
| 3033.91079 | 0.1345  |
| 3032.48172 | 0.14018 |
| 3031.05266 | 0.14594 |
| 3029.62359 | 0.15185 |
| 3028.19452 | 0.15802 |
| 3026.76545 | 0.16457 |
| 3025.33639 | 0.17152 |
| 3023.90732 | 0.17873 |
| 3022.47825 | 0.18602 |
| 3021.04918 | 0.19333 |
| 3019.62012 | 0.20068 |
| 3018.19105 | 0.20806 |
| 3016.76198 | 0.21543 |
| 3015.33291 | 0.22282 |
| 3013.90384 | 0.23034 |
| 3012.47478 | 0.23817 |
| 3011.04571 | 0.24639 |
| 3009.61664 | 0.25488 |
| 3008.18757 | 0.26335 |
| 3006.75851 | 0.27169 |
| 3005.32944 | 0.28009 |
| 3003.90037 | 0.28874 |
| 3002.4713  | 0.29758 |
| 3001.04223 | 0.30641 |
| 2999.61317 | 0.31521 |
| 2998.1841  | 0.32406 |

|            |         |
|------------|---------|
| 2996.75503 | 0.33294 |
| 2995.32596 | 0.34184 |
| 2993.8969  | 0.35081 |
| 2992.46783 | 0.35992 |
| 2991.03876 | 0.36916 |
| 2989.60969 | 0.37846 |
| 2988.18063 | 0.38767 |
| 2986.75156 | 0.39671 |
| 2985.32249 | 0.40571 |
| 2983.89342 | 0.41493 |
| 2982.46435 | 0.42436 |
| 2981.03529 | 0.43383 |
| 2979.60622 | 0.44328 |
| 2978.17715 | 0.45268 |
| 2976.74808 | 0.4619  |
| 2975.31902 | 0.47081 |
| 2973.88995 | 0.47956 |
| 2972.46088 | 0.48838 |
| 2971.03181 | 0.49725 |
| 2969.60274 | 0.50616 |
| 2968.17368 | 0.51529 |
| 2966.74461 | 0.52487 |
| 2965.31554 | 0.53471 |
| 2963.88647 | 0.54439 |
| 2962.45741 | 0.55371 |
| 2961.02834 | 0.56286 |
| 2959.59927 | 0.57207 |
| 2958.1702  | 0.58135 |
| 2956.74114 | 0.59058 |
| 2955.31207 | 0.59973 |
| 2953.883   | 0.60883 |
| 2952.45393 | 0.61788 |
| 2951.02486 | 0.6268  |
| 2949.5958  | 0.63561 |
| 2948.16673 | 0.6444  |
| 2946.73766 | 0.65322 |
| 2945.30859 | 0.66206 |
| 2943.87953 | 0.67095 |
| 2942.45046 | 0.68008 |
| 2941.02139 | 0.68944 |
| 2939.59232 | 0.69873 |
| 2938.16325 | 0.70762 |
| 2936.73419 | 0.71613 |
| 2935.30512 | 0.72448 |
| 2933.87605 | 0.73286 |
| 2932.44698 | 0.7414  |
| 2931.01792 | 0.75015 |
| 2929.58885 | 0.75903 |
| 2928.15978 | 0.76783 |
| 2926.73071 | 0.7764  |
| 2925.30165 | 0.78477 |
| 2923.87258 | 0.79301 |
| 2922.44351 | 0.80115 |
| 2921.01444 | 0.8092  |

|            |         |
|------------|---------|
| 2919.58537 | 0.81723 |
| 2918.15631 | 0.82528 |
| 2916.72724 | 0.8333  |
| 2915.29817 | 0.84122 |
| 2913.8691  | 0.84902 |
| 2912.44004 | 0.85673 |
| 2911.01097 | 0.86437 |
| 2909.5819  | 0.87193 |
| 2908.15283 | 0.87928 |
| 2906.72376 | 0.88633 |
| 2905.2947  | 0.89312 |
| 2903.86563 | 0.89977 |
| 2902.43656 | 0.90642 |
| 2901.00749 | 0.91302 |
| 2899.57843 | 0.91941 |
| 2898.14936 | 0.92546 |
| 2896.72029 | 0.93118 |
| 2895.29122 | 0.93667 |
| 2893.86216 | 0.94197 |
| 2892.43309 | 0.9471  |
| 2891.00402 | 0.95208 |
| 2889.57495 | 0.95687 |
| 2888.14588 | 0.96139 |
| 2886.71682 | 0.9656  |
| 2885.28775 | 0.96953 |
| 2883.85868 | 0.97326 |
| 2882.42961 | 0.97694 |
| 2881.00055 | 0.9805  |
| 2879.57148 | 0.98377 |
| 2878.14241 | 0.98659 |
| 2876.71334 | 0.98905 |
| 2875.28427 | 0.99132 |
| 2873.85521 | 0.99351 |
| 2872.42614 | 0.9956  |
| 2870.99707 | 0.99751 |
| 2869.568   | 0.99919 |
| 2868.13894 | 1.00073 |
| 2866.70987 | 1.00213 |
| 2865.2808  | 1.00331 |
| 2863.85173 | 1.00412 |
| 2862.42266 | 1.00453 |
| 2860.9936  | 1.00468 |
| 2859.56453 | 1.00483 |
| 2858.13546 | 1.00501 |
| 2856.70639 | 1.00512 |
| 2855.27733 | 1.00507 |
| 2853.84826 | 1.00487 |
| 2852.41919 | 1.00453 |
| 2850.99012 | 1.00401 |
| 2849.56106 | 1.00338 |
| 2848.13199 | 1.00275 |
| 2846.70292 | 1.00218 |
| 2845.27385 | 1.00164 |
| 2843.84478 | 1.00095 |

|            |         |
|------------|---------|
| 2842.41572 | 1       |
| 2840.98665 | 0.99922 |
| 2839.55758 | 0.99832 |
| 2838.12851 | 0.99746 |
| 2836.69945 | 0.99657 |
| 2835.27038 | 0.99599 |
| 2833.84131 | 0.99519 |
| 2832.41224 | 0.99468 |
| 2830.98317 | 0.994   |
| 2829.55411 | 0.99326 |
| 2828.12504 | 0.99431 |
| 2826.69597 | 0.99539 |
| 2825.2669  | 0.99633 |
| 2823.83784 | 0.99704 |
| 2822.40877 | 0.99753 |
| 2820.9797  | 0.99795 |
| 2819.55063 | 0.9984  |
| 2818.12157 | 0.99887 |
| 2816.6925  | 0.99929 |
| 2815.26343 | 0.99955 |
| 2813.83436 | 0.99967 |
| 2812.40529 | 0.99969 |
| 2810.97623 | 0.99967 |
| 2809.54716 | 0.99966 |
| 2808.11809 | 0.99964 |
| 2806.68902 | 0.99957 |
| 2805.25996 | 0.9994  |
| 2803.83089 | 0.99914 |
| 2802.40182 | 0.99878 |
| 2800.97275 | 0.99827 |
| 2799.54368 | 0.99792 |
| 2798.11462 | 0.99748 |
| 2796.68555 | 0.99706 |
| 2795.25648 | 0.99669 |
| 2793.82741 | 0.99625 |
| 2792.39835 | 0.99566 |
| 2790.96928 | 0.99546 |
| 2789.54021 | 0.99524 |
| 2788.11114 | 0.99504 |
| 2786.68208 | 0.9948  |
| 2785.25301 | 0.99449 |
| 2783.82394 | 0.99411 |
| 2782.39487 | 0.9937  |
| 2780.9658  | 0.9933  |
| 2779.53674 | 0.99284 |
| 2778.10767 | 0.99226 |
| 2776.6786  | 0.99154 |
| 2775.24953 | 0.99077 |
| 2773.82047 | 0.99007 |
| 2772.3914  | 0.99091 |
| 2770.96233 | 0.99186 |
| 2769.53326 | 0.99285 |
| 2768.10419 | 0.99379 |
| 2766.67513 | 0.99457 |

|            |         |
|------------|---------|
| 2765.24606 | 0.99518 |
| 2763.81699 | 0.99568 |
| 2762.38792 | 0.99621 |
| 2760.95886 | 0.99683 |
| 2759.52979 | 0.9975  |
| 2758.10072 | 0.99814 |
| 2756.67165 | 0.99867 |
| 2755.24259 | 0.99911 |
| 2753.81352 | 0.99951 |
| 2752.38445 | 0.99994 |
| 2750.95538 | 1.00034 |
| 2749.52631 | 1.00063 |
| 2748.09725 | 1.00086 |
| 2746.66818 | 1.0011  |
| 2745.23911 | 1.00138 |
| 2743.81004 | 1.00167 |
| 2742.38098 | 1.00189 |
| 2740.95191 | 1.00198 |
| 2739.52284 | 1.00188 |
| 2738.09377 | 1.00159 |
| 2736.6647  | 1.0012  |
| 2735.23564 | 1.00085 |
| 2733.80657 | 1.00044 |
| 2732.3775  | 1       |
| 2730.94843 | 0.99942 |
| 2729.51937 | 0.99862 |
| 2728.0903  | 0.99853 |
| 2726.66123 | 0.99837 |
| 2725.23216 | 0.99813 |
| 2723.8031  | 0.99781 |
| 2722.37403 | 0.99741 |
| 2720.94496 | 0.99691 |
| 2719.51589 | 0.99663 |
| 2718.08682 | 0.99628 |
| 2716.65776 | 0.99634 |
| 2715.22869 | 0.99629 |
| 2713.79962 | 0.99615 |
| 2712.37055 | 0.99591 |
| 2710.94149 | 0.99546 |
| 2709.51242 | 0.99472 |
| 2708.08335 | 0.99375 |
| 2706.65428 | 0.99275 |
| 2705.22521 | 0.99183 |
| 2703.79615 | 0.99092 |
| 2702.36708 | 0.9899  |
| 2700.93801 | 0.98871 |
| 2699.50894 | 0.98739 |
| 2698.07988 | 0.98599 |
| 2696.65081 | 0.98453 |
| 2695.22174 | 0.98306 |
| 2693.79267 | 0.98161 |
| 2692.36361 | 0.98018 |
| 2690.93454 | 0.97869 |
| 2689.50547 | 0.97717 |



|            |         |
|------------|---------|
| 2688.0764  | 0.9757  |
| 2686.64733 | 0.97435 |
| 2685.21827 | 0.9731  |
| 2683.7892  | 0.97191 |
| 2682.36013 | 0.97077 |
| 2680.93106 | 0.96972 |
| 2679.502   | 0.96875 |
| 2678.07293 | 0.96787 |
| 2676.64386 | 0.96711 |
| 2675.21479 | 0.96644 |
| 2673.78572 | 0.96577 |
| 2672.35666 | 0.96508 |
| 2670.92759 | 0.96442 |
| 2669.49852 | 0.96389 |
| 2668.06945 | 0.96351 |
| 2666.64039 | 0.96316 |
| 2665.21132 | 0.96277 |
| 2663.78225 | 0.96233 |
| 2662.35318 | 0.96194 |
| 2660.92411 | 0.96165 |
| 2659.49505 | 0.9614  |
| 2658.06598 | 0.96116 |
| 2656.63691 | 0.96097 |
| 2655.20784 | 0.96088 |
| 2653.77878 | 0.96088 |
| 2652.34971 | 0.96092 |
| 2650.92064 | 0.96101 |
| 2649.49157 | 0.96115 |
| 2648.06251 | 0.96132 |
| 2646.63344 | 0.96152 |
| 2645.20437 | 0.96177 |
| 2643.7753  | 0.96204 |
| 2642.34623 | 0.96226 |
| 2640.91717 | 0.9624  |
| 2639.4881  | 0.96251 |
| 2638.05903 | 0.96271 |
| 2636.62996 | 0.96307 |
| 2635.2009  | 0.96357 |
| 2633.77183 | 0.96407 |
| 2632.34276 | 0.96451 |
| 2630.91369 | 0.965   |
| 2629.48462 | 0.96562 |
| 2628.05556 | 0.96635 |
| 2626.62649 | 0.96711 |
| 2625.19742 | 0.96789 |
| 2623.76835 | 0.96874 |
| 2622.33929 | 0.96968 |
| 2620.91022 | 0.97072 |
| 2619.48115 | 0.97183 |
| 2618.05208 | 0.97297 |
| 2616.62302 | 0.97413 |
| 2615.19395 | 0.97533 |
| 2613.76488 | 0.97661 |
| 2612.33581 | 0.97803 |

|            |         |
|------------|---------|
| 2610.90674 | 0.97958 |
| 2609.47768 | 0.98114 |
| 2608.04861 | 0.98263 |
| 2606.61954 | 0.98401 |
| 2605.19047 | 0.98537 |
| 2603.76141 | 0.98678 |
| 2602.33234 | 0.98827 |
| 2600.90327 | 0.98982 |
| 2599.4742  | 0.99134 |
| 2598.04513 | 0.9928  |
| 2596.61607 | 0.99419 |
| 2595.187   | 0.99555 |
| 2593.75793 | 0.99686 |
| 2592.32886 | 0.998   |
| 2590.8998  | 0.99884 |
| 2589.47073 | 0.99938 |
| 2588.04166 | 0.99977 |
| 2586.61259 | 1.00009 |
| 2585.18353 | 1.00023 |
| 2583.75446 | 1       |
| 2582.32539 | 0.99967 |
| 2580.89632 | 0.9994  |
| 2579.46725 | 0.9989  |
| 2578.03819 | 0.99802 |
| 2576.60912 | 0.99667 |
| 2575.18005 | 0.9948  |
| 2573.75098 | 0.99239 |
| 2572.32192 | 0.98952 |
| 2570.89285 | 0.98625 |
| 2569.46378 | 0.98262 |
| 2568.03471 | 0.97859 |
| 2566.60564 | 0.97414 |
| 2565.17658 | 0.96922 |
| 2563.74751 | 0.96381 |
| 2562.31844 | 0.95794 |
| 2560.88937 | 0.95166 |
| 2559.46031 | 0.94503 |
| 2558.03124 | 0.93812 |
| 2556.60217 | 0.93097 |
| 2555.1731  | 0.92353 |
| 2553.74404 | 0.91572 |
| 2552.31497 | 0.90757 |
| 2550.8859  | 0.89914 |
| 2549.45683 | 0.89054 |
| 2548.02776 | 0.88177 |
| 2546.5987  | 0.87279 |
| 2545.16963 | 0.86361 |
| 2543.74056 | 0.85433 |
| 2542.31149 | 0.84501 |
| 2540.88243 | 0.83569 |
| 2539.45336 | 0.82643 |
| 2538.02429 | 0.81729 |
| 2536.59522 | 0.80827 |
| 2535.16615 | 0.79934 |

|            |         |
|------------|---------|
| 2533.73709 | 0.79056 |
| 2532.30802 | 0.78204 |
| 2530.87895 | 0.77391 |
| 2529.44988 | 0.76617 |
| 2528.02082 | 0.75878 |
| 2526.59175 | 0.75177 |
| 2525.16268 | 0.74523 |
| 2523.73361 | 0.73921 |
| 2522.30455 | 0.73377 |
| 2520.87548 | 0.72893 |
| 2519.44641 | 0.72471 |
| 2518.01734 | 0.72105 |
| 2516.58827 | 0.71796 |
| 2515.15921 | 0.71547 |
| 2513.73014 | 0.71359 |
| 2512.30107 | 0.7122  |
| 2510.872   | 0.71121 |
| 2509.44294 | 0.71065 |
| 2508.01387 | 0.71063 |
| 2506.5848  | 0.71114 |
| 2505.15573 | 0.71219 |
| 2503.72666 | 0.7138  |
| 2502.2976  | 0.71607 |
| 2500.86853 | 0.71902 |
| 2499.43946 | 0.72273 |
| 2498.01039 | 0.7273  |
| 2496.58133 | 0.73275 |
| 2495.15226 | 0.73907 |
| 2493.72319 | 0.74625 |
| 2492.29412 | 0.75432 |
| 2490.86505 | 0.76329 |
| 2489.43599 | 0.77307 |
| 2488.00692 | 0.7835  |
| 2486.57785 | 0.79444 |
| 2485.14878 | 0.80577 |
| 2483.71972 | 0.81734 |
| 2482.29065 | 0.82903 |
| 2480.86158 | 0.84077 |
| 2479.43251 | 0.85244 |
| 2478.00345 | 0.86392 |
| 2476.57438 | 0.87511 |
| 2475.14531 | 0.88596 |
| 2473.71624 | 0.89643 |
| 2472.28717 | 0.90649 |
| 2470.85811 | 0.91607 |
| 2469.42904 | 0.9251  |
| 2467.99997 | 0.93355 |
| 2466.5709  | 0.94142 |
| 2465.14184 | 0.94873 |
| 2463.71277 | 0.95551 |
| 2462.2837  | 0.96174 |
| 2460.85463 | 0.96743 |
| 2459.42556 | 0.97259 |
| 2457.9965  | 0.97723 |

|            |         |
|------------|---------|
| 2456.56743 | 0.98132 |
| 2455.13836 | 0.98488 |
| 2453.70929 | 0.98799 |
| 2452.28023 | 0.99072 |
| 2450.85116 | 0.99307 |
| 2449.42209 | 0.99505 |
| 2447.99302 | 0.99667 |
| 2446.56396 | 0.99795 |
| 2445.13489 | 0.99891 |
| 2443.70582 | 0.99957 |
| 2442.27675 | 0.99995 |
| 2440.84768 | 1.00008 |
| 2439.41862 | 1       |
| 2437.98955 | 1.00013 |
| 2436.56048 | 1.00011 |
| 2435.13141 | 1       |
| 2433.70235 | 0.99974 |
| 2432.27328 | 0.99929 |
| 2430.84421 | 0.99859 |
| 2429.41514 | 0.9976  |
| 2427.98607 | 0.99631 |
| 2426.55701 | 0.99476 |
| 2425.12794 | 0.99298 |
| 2423.69887 | 0.99097 |
| 2422.2698  | 0.9887  |
| 2420.84074 | 0.98607 |
| 2419.41167 | 0.98305 |
| 2417.9826  | 0.97962 |
| 2416.55353 | 0.97577 |
| 2415.12447 | 0.97145 |
| 2413.6954  | 0.96663 |
| 2412.26633 | 0.96134 |
| 2410.83726 | 0.95557 |
| 2409.40819 | 0.94933 |
| 2407.97913 | 0.94259 |
| 2406.55006 | 0.93533 |
| 2405.12099 | 0.92754 |
| 2403.69192 | 0.91925 |
| 2402.26286 | 0.91057 |
| 2400.83379 | 0.90156 |
| 2399.40472 | 0.89219 |
| 2397.97565 | 0.88244 |
| 2396.54658 | 0.87233 |
| 2395.11752 | 0.86194 |
| 2393.68845 | 0.85132 |
| 2392.25938 | 0.84049 |
| 2390.83031 | 0.82945 |
| 2389.40125 | 0.81817 |
| 2387.97218 | 0.80666 |
| 2386.54311 | 0.79492 |
| 2385.11404 | 0.78296 |
| 2383.68498 | 0.77078 |
| 2382.25591 | 0.75832 |
| 2380.82684 | 0.74557 |

|            |         |
|------------|---------|
| 2379.39777 | 0.73249 |
| 2377.9687  | 0.71905 |
| 2376.53964 | 0.7053  |
| 2375.11057 | 0.69135 |
| 2373.6815  | 0.6773  |
| 2372.25243 | 0.66328 |
| 2370.82337 | 0.64941 |
| 2369.3943  | 0.63591 |
| 2367.96523 | 0.62313 |
| 2366.53616 | 0.61159 |
| 2365.10709 | 0.60185 |
| 2363.67803 | 0.59433 |
| 2362.24896 | 0.58939 |
| 2360.81989 | 0.58765 |
| 2359.39082 | 0.58978 |
| 2357.96176 | 0.59628 |
| 2356.53269 | 0.60735 |
| 2355.10362 | 0.62284 |
| 2353.67455 | 0.64207 |
| 2352.24549 | 0.6631  |
| 2350.81642 | 0.68285 |
| 2349.38735 | 0.69978 |
| 2347.95828 | 0.71535 |
| 2346.52921 | 0.73289 |
| 2345.10015 | 0.75509 |
| 2343.67108 | 0.78088 |
| 2342.24201 | 0.8062  |
| 2340.81294 | 0.82888 |
| 2339.38388 | 0.84919 |
| 2337.95481 | 0.86769 |
| 2336.52574 | 0.88457 |
| 2335.09667 | 0.89968 |
| 2333.6676  | 0.91309 |
| 2332.23854 | 0.92541 |
| 2330.80947 | 0.93717 |
| 2329.3804  | 0.94812 |
| 2327.95133 | 0.95769 |
| 2326.52227 | 0.9657  |
| 2325.0932  | 0.97249 |
| 2323.66413 | 0.97847 |
| 2322.23506 | 0.98377 |
| 2320.80599 | 0.98832 |
| 2319.37693 | 0.99189 |
| 2317.94786 | 0.99421 |
| 2316.51879 | 0.99519 |
| 2315.08972 | 0.99512 |
| 2313.66066 | 0.99441 |
| 2312.23159 | 0.9932  |
| 2310.80252 | 0.99135 |
| 2309.37345 | 0.98866 |
| 2307.94439 | 0.98503 |
| 2306.51532 | 0.98046 |
| 2305.08625 | 0.975   |
| 2303.65718 | 0.96872 |

|            |         |
|------------|---------|
| 2302.22811 | 0.9616  |
| 2300.79905 | 0.95354 |
| 2299.36998 | 0.94436 |
| 2297.94091 | 0.93391 |
| 2296.51184 | 0.92213 |
| 2295.08278 | 0.90894 |
| 2293.65371 | 0.89422 |
| 2292.22464 | 0.87788 |
| 2290.79557 | 0.8599  |
| 2289.3665  | 0.84031 |
| 2287.93744 | 0.81909 |
| 2286.50837 | 0.7962  |
| 2285.0793  | 0.77163 |
| 2283.65023 | 0.74545 |
| 2282.22117 | 0.7177  |
| 2280.7921  | 0.6884  |
| 2279.36303 | 0.6576  |
| 2277.93396 | 0.62546 |
| 2276.5049  | 0.59221 |
| 2275.07583 | 0.55818 |
| 2273.64676 | 0.52371 |
| 2272.21769 | 0.48926 |
| 2270.78862 | 0.45534 |
| 2269.35956 | 0.42255 |
| 2267.93049 | 0.39159 |
| 2266.50142 | 0.36326 |
| 2265.07235 | 0.33846 |
| 2263.64329 | 0.31827 |
| 2262.21422 | 0.30373 |
| 2260.78515 | 0.29573 |
| 2259.35608 | 0.29483 |
| 2257.92701 | 0.30115 |
| 2256.49795 | 0.31442 |
| 2255.06888 | 0.33406 |
| 2253.63981 | 0.35922 |
| 2252.21074 | 0.3888  |
| 2250.78168 | 0.42167 |
| 2249.35261 | 0.45665 |
| 2247.92354 | 0.49252 |
| 2246.49447 | 0.52805 |
| 2245.06541 | 0.56214 |
| 2243.63634 | 0.59399 |
| 2242.20727 | 0.62316 |
| 2240.7782  | 0.64949 |
| 2239.34913 | 0.67308 |
| 2237.92007 | 0.69437 |
| 2236.491   | 0.71412 |
| 2235.06193 | 0.7331  |
| 2233.63286 | 0.75195 |
| 2232.2038  | 0.77105 |
| 2230.77473 | 0.79045 |
| 2229.34566 | 0.80989 |
| 2227.91659 | 0.82888 |
| 2226.48752 | 0.84677 |

|            |         |
|------------|---------|
| 2225.05846 | 0.86299 |
| 2223.62939 | 0.87714 |
| 2222.20032 | 0.88906 |
| 2220.77125 | 0.89885 |
| 2219.34219 | 0.90684 |
| 2217.91312 | 0.91351 |
| 2216.48405 | 0.91946 |
| 2215.05498 | 0.92522 |
| 2213.62592 | 0.93126 |
| 2212.19685 | 0.93785 |
| 2210.76778 | 0.94505 |
| 2209.33871 | 0.95269 |
| 2207.90964 | 0.96049 |
| 2206.48058 | 0.96815 |
| 2205.05151 | 0.97536 |
| 2203.62244 | 0.98185 |
| 2202.19337 | 0.98747 |
| 2200.76431 | 0.99214 |
| 2199.33524 | 0.99583 |
| 2197.90617 | 0.99857 |
| 2196.4771  | 1.00038 |
| 2195.04803 | 1.00132 |
| 2193.61897 | 1.00149 |
| 2192.1899  | 1.00134 |
| 2190.76083 | 1.00132 |
| 2189.33176 | 1.00104 |
| 2187.9027  | 1.00091 |
| 2186.47363 | 1.00082 |
| 2185.04456 | 1.00023 |
| 2183.61549 | 0.99923 |
| 2182.18643 | 0.99794 |
| 2180.75736 | 0.99641 |
| 2179.32829 | 0.99463 |
| 2177.89922 | 0.99599 |
| 2176.47015 | 0.99714 |
| 2175.04109 | 0.9981  |
| 2173.61202 | 0.99887 |
| 2172.18295 | 0.99944 |
| 2170.75388 | 0.99981 |
| 2169.32482 | 1       |
| 2167.89575 | 1.00004 |
| 2166.46668 | 1       |
| 2165.03761 | 1.00007 |
| 2163.60854 | 1.00005 |
| 2162.17948 | 0.99996 |
| 2160.75041 | 0.99982 |
| 2159.32134 | 0.99965 |
| 2157.89227 | 0.99946 |
| 2156.46321 | 0.99923 |
| 2155.03414 | 0.99897 |
| 2153.60507 | 0.99871 |
| 2152.176   | 0.99845 |
| 2150.74694 | 0.99818 |
| 2149.31787 | 0.9979  |

|            |         |
|------------|---------|
| 2147.8888  | 0.9976  |
| 2146.45973 | 0.99727 |
| 2145.03066 | 0.9969  |
| 2143.6016  | 0.99649 |
| 2142.17253 | 0.99602 |
| 2140.74346 | 0.99547 |
| 2139.31439 | 0.99483 |
| 2137.88533 | 0.99409 |
| 2136.45626 | 0.99324 |
| 2135.02719 | 0.99227 |
| 2133.59812 | 0.99119 |
| 2132.16905 | 0.99001 |
| 2130.73999 | 0.98871 |
| 2129.31092 | 0.98732 |
| 2127.88185 | 0.98583 |
| 2126.45278 | 0.98425 |
| 2125.02372 | 0.98262 |
| 2123.59465 | 0.98096 |
| 2122.16558 | 0.9792  |
| 2120.73651 | 0.97731 |
| 2119.30744 | 0.97532 |
| 2117.87838 | 0.97329 |
| 2116.44931 | 0.97127 |
| 2115.02024 | 0.96928 |
| 2113.59117 | 0.96732 |
| 2112.16211 | 0.9654  |
| 2110.73304 | 0.96347 |
| 2109.30397 | 0.96153 |
| 2107.8749  | 0.9596  |
| 2106.44584 | 0.95772 |
| 2105.01677 | 0.95591 |
| 2103.5877  | 0.95426 |
| 2102.15863 | 0.95287 |
| 2100.72956 | 0.95183 |
| 2099.3005  | 0.95116 |
| 2097.87143 | 0.95088 |
| 2096.44236 | 0.95106 |
| 2095.01329 | 0.95176 |
| 2093.58423 | 0.95301 |
| 2092.15516 | 0.95474 |
| 2090.72609 | 0.95695 |
| 2089.29702 | 0.95959 |
| 2087.86795 | 0.9626  |
| 2086.43889 | 0.96581 |
| 2085.00982 | 0.96911 |
| 2083.58075 | 0.97243 |
| 2082.15168 | 0.97573 |
| 2080.72262 | 0.97894 |
| 2079.29355 | 0.98207 |
| 2077.86448 | 0.98512 |
| 2076.43541 | 0.98806 |
| 2075.00635 | 0.99084 |
| 2073.57728 | 0.99334 |
| 2072.14821 | 0.99549 |



|            |         |
|------------|---------|
| 2070.71914 | 0.99722 |
| 2069.29007 | 0.99849 |
| 2067.86101 | 0.99926 |
| 2066.43194 | 0.99978 |
| 2065.00287 | 0.9999  |
| 2063.5738  | 1       |
| 2062.14474 | 1.00007 |
| 2060.71567 | 0.99956 |
| 2059.2866  | 0.99849 |
| 2057.85753 | 0.99687 |
| 2056.42846 | 0.99468 |
| 2054.9994  | 0.99181 |
| 2053.57033 | 0.98818 |
| 2052.14126 | 0.98374 |
| 2050.71219 | 0.9785  |
| 2049.28313 | 0.97251 |
| 2047.85406 | 0.96592 |
| 2046.42499 | 0.95894 |
| 2044.99592 | 0.95178 |
| 2043.56686 | 0.94468 |
| 2042.13779 | 0.93783 |
| 2040.70872 | 0.93141 |
| 2039.27965 | 0.92551 |
| 2037.85058 | 0.92026 |
| 2036.42152 | 0.91575 |
| 2034.99245 | 0.9121  |
| 2033.56338 | 0.90942 |
| 2032.13431 | 0.90781 |
| 2030.70525 | 0.90739 |
| 2029.27618 | 0.90831 |
| 2027.84711 | 0.91068 |
| 2026.41804 | 0.91462 |
| 2024.98897 | 0.9201  |
| 2023.55991 | 0.92692 |
| 2022.13084 | 0.93461 |
| 2020.70177 | 0.94264 |
| 2019.2727  | 0.95051 |
| 2017.84364 | 0.95787 |
| 2016.41457 | 0.96438 |
| 2014.9855  | 0.96958 |
| 2013.55643 | 0.97308 |
| 2012.12737 | 0.97473 |
| 2010.6983  | 0.97449 |
| 2009.26923 | 0.9723  |
| 2007.84016 | 0.96808 |
| 2006.41109 | 0.96191 |
| 2004.98203 | 0.95421 |
| 2003.55296 | 0.94593 |
| 2002.12389 | 0.93846 |
| 2000.69482 | 0.93331 |
| 1999.26576 | 0.93165 |
| 1997.83669 | 0.93392 |
| 1996.40762 | 0.93953 |
| 1994.97855 | 0.94729 |

|            |         |
|------------|---------|
| 1993.54948 | 0.95615 |
| 1992.12042 | 0.96529 |
| 1990.69135 | 0.97378 |
| 1989.26228 | 0.98079 |
| 1987.83321 | 0.98612 |
| 1986.40415 | 0.99008 |
| 1984.97508 | 0.99299 |
| 1983.54601 | 0.99507 |
| 1982.11694 | 0.99657 |
| 1980.68788 | 0.99771 |
| 1979.25881 | 0.99858 |
| 1977.82974 | 0.99914 |
| 1976.40067 | 0.99938 |
| 1974.9716  | 0.99983 |
| 1973.54254 | 1       |
| 1972.11347 | 1.00017 |
| 1970.6844  | 1.00031 |
| 1969.25533 | 1.00032 |
| 1967.82627 | 1.00039 |
| 1966.3972  | 1.00066 |
| 1964.96813 | 1.00098 |
| 1963.53906 | 1.00108 |
| 1962.10999 | 1.00097 |
| 1960.68093 | 1.00083 |
| 1959.25186 | 1.00074 |
| 1957.82279 | 1.0007  |
| 1956.39372 | 1.00065 |
| 1954.96466 | 1.0006  |
| 1953.53559 | 1.00055 |
| 1952.10652 | 1.00048 |
| 1950.67745 | 1.00035 |
| 1949.24838 | 1.00016 |
| 1947.81932 | 0.99988 |
| 1946.39025 | 0.99943 |
| 1944.96118 | 0.99881 |
| 1943.53211 | 0.99834 |
| 1942.10305 | 0.99834 |
| 1940.67398 | 0.9986  |
| 1939.24491 | 0.99864 |
| 1937.81584 | 0.9983  |
| 1936.38678 | 0.99779 |
| 1934.95771 | 0.99767 |
| 1933.52864 | 0.99763 |
| 1932.09957 | 0.99759 |
| 1930.6705  | 0.99751 |
| 1929.24144 | 0.99739 |
| 1927.81237 | 0.99718 |
| 1926.3833  | 0.99679 |
| 1924.95423 | 0.99632 |
| 1923.52517 | 0.99606 |
| 1922.0961  | 0.99603 |
| 1920.66703 | 0.99593 |
| 1919.23796 | 0.99583 |
| 1917.80889 | 0.99625 |

|            |         |
|------------|---------|
| 1916.37983 | 0.9972  |
| 1914.95076 | 0.99791 |
| 1913.52169 | 0.99796 |
| 1912.09262 | 0.99768 |
| 1910.66356 | 0.99755 |
| 1909.23449 | 0.99774 |
| 1907.80542 | 0.99813 |
| 1906.37635 | 0.99842 |
| 1904.94729 | 0.99839 |
| 1903.51822 | 0.99867 |
| 1902.08915 | 0.99892 |
| 1900.66008 | 0.99914 |
| 1899.23101 | 0.9992  |
| 1897.80195 | 0.99904 |
| 1896.37288 | 0.99879 |
| 1894.94381 | 0.99865 |
| 1893.51474 | 0.99843 |
| 1892.08568 | 0.99783 |
| 1890.65661 | 0.9971  |
| 1889.22754 | 0.99676 |
| 1887.79847 | 0.9967  |
| 1886.3694  | 0.99637 |
| 1884.94034 | 0.99559 |
| 1883.51127 | 0.99464 |
| 1882.0822  | 0.99364 |
| 1880.65313 | 0.99256 |
| 1879.22407 | 0.99275 |
| 1877.795   | 0.99288 |
| 1876.36593 | 0.993   |
| 1874.93686 | 0.99296 |
| 1873.5078  | 0.99289 |
| 1872.07873 | 0.9922  |
| 1870.64966 | 0.99136 |
| 1869.22059 | 0.9913  |
| 1867.79152 | 0.99244 |
| 1866.36246 | 0.99388 |
| 1864.93339 | 0.99457 |
| 1863.50432 | 0.99496 |
| 1862.07525 | 0.99512 |
| 1860.64619 | 0.99532 |
| 1859.21712 | 0.99554 |
| 1857.78805 | 0.99575 |
| 1856.35898 | 0.9959  |
| 1854.92991 | 0.99639 |
| 1853.50085 | 0.99678 |
| 1852.07178 | 0.997   |
| 1850.64271 | 0.99725 |
| 1849.21364 | 0.99719 |
| 1847.78458 | 0.99676 |
| 1846.35551 | 0.99617 |
| 1844.92644 | 0.99625 |
| 1843.49737 | 0.99761 |
| 1842.06831 | 0.99928 |
| 1840.63924 | 1       |

|            |         |
|------------|---------|
| 1839.21017 | 1.00022 |
| 1837.7811  | 1.00027 |
| 1836.35203 | 1.00059 |
| 1834.92297 | 1.00086 |
| 1833.4939  | 1.00054 |
| 1832.06483 | 0.99963 |
| 1830.63576 | 0.99895 |
| 1829.2067  | 0.99913 |
| 1827.77763 | 0.99968 |
| 1826.34856 | 0.9999  |
| 1824.91949 | 0.99993 |
| 1823.49042 | 1.0002  |
| 1822.06136 | 1.00028 |
| 1820.63229 | 0.99977 |
| 1819.20322 | 0.99883 |
| 1817.77415 | 0.99782 |
| 1816.34509 | 0.99674 |
| 1814.91602 | 0.99527 |
| 1813.48695 | 0.99328 |
| 1812.05788 | 0.99098 |
| 1810.62882 | 0.98865 |
| 1809.19975 | 0.98628 |
| 1807.77068 | 0.98343 |
| 1806.34161 | 0.97968 |
| 1804.91254 | 0.97491 |
| 1803.48348 | 0.96927 |
| 1802.05441 | 0.96323 |
| 1800.62534 | 0.95764 |
| 1799.19627 | 0.95313 |
| 1797.76721 | 0.94964 |
| 1796.33814 | 0.94667 |
| 1794.90907 | 0.94415 |
| 1793.48    | 0.94286 |
| 1792.05093 | 0.94404 |
| 1790.62187 | 0.94751 |
| 1789.1928  | 0.95121 |
| 1787.76373 | 0.95383 |
| 1786.33466 | 0.95567 |
| 1784.9056  | 0.95737 |
| 1783.47653 | 0.95891 |
| 1782.04746 | 0.96    |
| 1780.61839 | 0.96074 |
| 1779.18932 | 0.96129 |
| 1777.76026 | 0.96132 |
| 1776.33119 | 0.96034 |
| 1774.90212 | 0.95847 |
| 1773.47305 | 0.95666 |
| 1772.04399 | 0.9561  |
| 1770.61492 | 0.95661 |
| 1769.18585 | 0.95692 |
| 1767.75678 | 0.95649 |
| 1766.32772 | 0.95537 |
| 1764.89865 | 0.95348 |
| 1763.46958 | 0.95104 |

|            |         |
|------------|---------|
| 1762.04051 | 0.94887 |
| 1760.61144 | 0.9474  |
| 1759.18238 | 0.94601 |
| 1757.75331 | 0.94427 |
| 1756.32424 | 0.94247 |
| 1754.89517 | 0.94054 |
| 1753.46611 | 0.93791 |
| 1752.03704 | 0.93464 |
| 1750.60797 | 0.93179 |
| 1749.1789  | 0.93013 |
| 1747.74983 | 0.92901 |
| 1746.32077 | 0.92743 |
| 1744.8917  | 0.92515 |
| 1743.46263 | 0.92231 |
| 1742.03356 | 0.9192  |
| 1740.6045  | 0.91619 |
| 1739.17543 | 0.91333 |
| 1737.74636 | 0.90996 |
| 1736.31729 | 0.90551 |
| 1734.88823 | 0.90062 |
| 1733.45916 | 0.89701 |
| 1732.03009 | 0.89483 |
| 1730.60102 | 0.89225 |
| 1729.17195 | 0.88868 |
| 1727.74289 | 0.88467 |
| 1726.31382 | 0.88044 |
| 1724.88475 | 0.87584 |
| 1723.45568 | 0.87092 |
| 1722.02662 | 0.86564 |
| 1720.59755 | 0.85955 |
| 1719.16848 | 0.85261 |
| 1717.73941 | 0.8459  |
| 1716.31034 | 0.84076 |
| 1714.88128 | 0.83675 |
| 1713.45221 | 0.83247 |
| 1712.02314 | 0.8273  |
| 1710.59407 | 0.8213  |
| 1709.16501 | 0.81467 |
| 1707.73594 | 0.80754 |
| 1706.30687 | 0.80024 |
| 1704.8778  | 0.79334 |
| 1703.44874 | 0.78669 |
| 1702.01967 | 0.77945 |
| 1700.5906  | 0.77148 |
| 1699.16153 | 0.76407 |
| 1697.73246 | 0.75765 |
| 1696.3034  | 0.75119 |
| 1694.87433 | 0.74453 |
| 1693.44526 | 0.73811 |
| 1692.01619 | 0.73132 |
| 1690.58713 | 0.72347 |
| 1689.15806 | 0.71492 |
| 1687.72899 | 0.70634 |
| 1686.29992 | 0.69722 |

|            |         |
|------------|---------|
| 1684.87085 | 0.68678 |
| 1683.44179 | 0.67653 |
| 1682.01272 | 0.66839 |
| 1680.58365 | 0.66111 |
| 1679.15458 | 0.65324 |
| 1677.72552 | 0.64459 |
| 1676.29645 | 0.6353  |
| 1674.86738 | 0.62584 |
| 1673.43831 | 0.61703 |
| 1672.00925 | 0.60882 |
| 1670.58018 | 0.60045 |
| 1669.15111 | 0.59213 |
| 1667.72204 | 0.58487 |
| 1666.29297 | 0.5784  |
| 1664.86391 | 0.57159 |
| 1663.43484 | 0.56412 |
| 1662.00577 | 0.5568  |
| 1660.5767  | 0.55033 |
| 1659.14764 | 0.54438 |
| 1657.71857 | 0.53836 |
| 1656.2895  | 0.53195 |
| 1654.86043 | 0.52473 |
| 1653.43136 | 0.51678 |
| 1652.0023  | 0.51017 |
| 1650.57323 | 0.50544 |
| 1649.14416 | 0.5005  |
| 1647.71509 | 0.49433 |
| 1646.28603 | 0.48785 |
| 1644.85696 | 0.48241 |
| 1643.42789 | 0.47755 |
| 1641.99882 | 0.47222 |
| 1640.56976 | 0.46629 |
| 1639.14069 | 0.45997 |
| 1637.71162 | 0.45319 |
| 1636.28255 | 0.44589 |
| 1634.85348 | 0.43904 |
| 1633.42442 | 0.43359 |
| 1631.99535 | 0.42873 |
| 1630.56628 | 0.42341 |
| 1629.13721 | 0.41747 |
| 1627.70815 | 0.41145 |
| 1626.27908 | 0.40574 |
| 1624.85001 | 0.40023 |
| 1623.42094 | 0.39484 |
| 1621.99187 | 0.3899  |
| 1620.56281 | 0.38554 |
| 1619.13374 | 0.3813  |
| 1617.70467 | 0.37671 |
| 1616.2756  | 0.37204 |
| 1614.84654 | 0.368   |
| 1613.41747 | 0.36436 |
| 1611.9884  | 0.3604  |
| 1610.55933 | 0.35585 |
| 1609.13026 | 0.35087 |

|            |         |
|------------|---------|
| 1607.7012  | 0.3457  |
| 1606.27213 | 0.34049 |
| 1604.84306 | 0.33519 |
| 1603.41399 | 0.32967 |
| 1601.98493 | 0.32391 |
| 1600.55586 | 0.31805 |
| 1599.12679 | 0.31213 |
| 1597.69772 | 0.30607 |
| 1596.26866 | 0.29982 |
| 1594.83959 | 0.29341 |
| 1593.41052 | 0.28692 |
| 1591.98145 | 0.28043 |
| 1590.55238 | 0.27393 |
| 1589.12332 | 0.26739 |
| 1587.69425 | 0.26083 |
| 1586.26518 | 0.25418 |
| 1584.83611 | 0.24739 |
| 1583.40705 | 0.24045 |
| 1581.97798 | 0.23341 |
| 1580.54891 | 0.22652 |
| 1579.11984 | 0.21986 |
| 1577.69077 | 0.21287 |
| 1576.26171 | 0.20492 |
| 1574.83264 | 0.19691 |
| 1573.40357 | 0.19008 |
| 1571.9745  | 0.18372 |
| 1570.54544 | 0.17644 |
| 1569.11637 | 0.16818 |
| 1567.6873  | 0.16024 |
| 1566.25823 | 0.1531  |
| 1564.82917 | 0.14624 |
| 1563.4001  | 0.13962 |
| 1561.97103 | 0.13336 |
| 1560.54196 | 0.12634 |
| 1559.11289 | 0.1166  |
| 1557.68383 | 0.10591 |
| 1556.25476 | 0.0978  |
| 1554.82569 | 0.09103 |
| 1553.39662 | 0.08408 |
| 1551.96756 | 0.07696 |
| 1550.53849 | 0.0698  |
| 1549.10942 | 0.06267 |
| 1547.68035 | 0.05594 |
| 1546.25128 | 0.04968 |
| 1544.82222 | 0.04358 |
| 1543.39315 | 0.03767 |
| 1541.96408 | 0.03215 |
| 1540.53501 | 0.02681 |
| 1539.10595 | 0.02207 |
| 1537.67688 | 0.01877 |
| 1536.24781 | 0.01647 |
| 1534.81874 | 0.01441 |
| 1533.38968 | 0.01239 |
| 1531.96061 | 0.01061 |

|            |         |
|------------|---------|
| 1530.53154 | 0.00923 |
| 1529.10247 | 0.00805 |
| 1527.6734  | 0.00685 |
| 1526.24434 | 0.00579 |
| 1524.81527 | 0.00508 |
| 1523.3862  | 0.00457 |
| 1521.95713 | 0.00402 |
| 1520.52807 | 0.00345 |
| 1519.099   | 0.00299 |
| 1517.66993 | 0.00264 |
| 1516.24086 | 0.00229 |
| 1514.81179 | 0.00189 |
| 1513.38273 | 0.00151 |
| 1511.95366 | 0.00128 |
| 1510.52459 | 0.00123 |
| 1509.09552 | 0.00132 |
| 1507.66646 | 0.00141 |
| 1506.23739 | 0.00136 |
| 1504.80832 | 0.00114 |
| 1503.37925 | 0.00084 |
| 1501.95019 | 0.00057 |
| 1500.52112 | 0.00046 |
| 1499.09205 | 0.00043 |
| 1497.66298 | 0.00035 |
| 1496.23391 | 0.00019 |
| 1494.80485 | 0.00024 |
| 1493.37578 | 0.00033 |
| 1491.94671 | 0.00035 |
| 1490.51764 | 0.00028 |
| 1489.08858 | 0.00027 |
| 1487.65951 | 0.00027 |
| 1486.23044 | 0.00016 |
| 1484.80137 | 0.00027 |
| 1483.3723  | 0.00027 |
| 1481.94324 | 0.00027 |
| 1480.51417 | 0.00043 |
| 1479.0851  | 0.00061 |
| 1477.65603 | 0.00074 |
| 1476.22697 | 0.00077 |
| 1474.7979  | 0.00073 |
| 1473.36883 | 0.00066 |
| 1471.93976 | 0.00055 |
| 1470.5107  | 0.00046 |
| 1469.08163 | 0.00041 |
| 1467.65256 | 0.00037 |
| 1466.22349 | 0.00038 |
| 1464.79442 | 0.00043 |
| 1463.36536 | 0.00044 |
| 1461.93629 | 0.00033 |
| 1460.50722 | 0.00028 |
| 1459.07815 | 0.00033 |
| 1457.64909 | 0.00045 |
| 1456.22002 | 0.00049 |
| 1454.79095 | 0.00049 |



|            |         |
|------------|---------|
| 1453.36188 | 0.0005  |
| 1451.93281 | 0.00044 |
| 1450.50375 | 0.00029 |
| 1449.07468 | 0.00016 |
| 1447.64561 | 0.00016 |
| 1446.21654 | 0.00025 |
| 1444.78748 | 0.00028 |
| 1443.35841 | 0.00024 |
| 1441.92934 | 0.00024 |
| 1440.50027 | 0.00027 |
| 1439.07121 | 0.00029 |
| 1437.64214 | 0.00031 |
| 1436.21307 | 0.00029 |
| 1434.784   | 0.00029 |
| 1433.35493 | 0.00028 |
| 1431.92587 | 0.00027 |
| 1430.4968  | 0.00032 |
| 1429.06773 | 0.00042 |
| 1427.63866 | 0.00044 |
| 1426.2096  | 0.00029 |
| 1424.78053 | 0.00016 |
| 1423.35146 | 0.00029 |
| 1421.92239 | 0.00033 |
| 1420.49332 | 0.00026 |
| 1419.06426 | 0.00041 |
| 1417.63519 | 0.00054 |
| 1416.20612 | 0.0005  |
| 1414.77705 | 0.00034 |
| 1413.34799 | 0.00027 |
| 1411.91892 | 0.00035 |
| 1410.48985 | 0.0004  |
| 1409.06078 | 0.00037 |
| 1407.63171 | 0.00036 |
| 1406.20265 | 0.00052 |
| 1404.77358 | 0.0007  |
| 1403.34451 | 0.00079 |
| 1401.91544 | 0.0008  |
| 1400.48638 | 0.00079 |
| 1399.05731 | 0.00075 |
| 1397.62824 | 0.00068 |
| 1396.19917 | 0.00064 |
| 1394.77011 | 0.00068 |
| 1393.34104 | 0.00072 |
| 1391.91197 | 0.00072 |
| 1390.4829  | 0.00064 |
| 1389.05383 | 0.00054 |
| 1387.62477 | 0.00058 |
| 1386.1957  | 0.00073 |
| 1384.76663 | 0.00097 |
| 1383.33756 | 0.00125 |
| 1381.9085  | 0.00149 |
| 1380.47943 | 0.00165 |
| 1379.05036 | 0.00177 |
| 1377.62129 | 0.00196 |

|            |         |
|------------|---------|
| 1376.19222 | 0.00236 |
| 1374.76316 | 0.00303 |
| 1373.33409 | 0.00398 |
| 1371.90502 | 0.00509 |
| 1370.47595 | 0.00632 |
| 1369.04689 | 0.00778 |
| 1367.61782 | 0.00958 |
| 1366.18875 | 0.0117  |
| 1364.75968 | 0.01417 |
| 1363.33062 | 0.01706 |
| 1361.90155 | 0.02041 |
| 1360.47248 | 0.02408 |
| 1359.04341 | 0.02804 |
| 1357.61434 | 0.03243 |
| 1356.18528 | 0.03736 |
| 1354.75621 | 0.04282 |
| 1353.32714 | 0.04872 |
| 1351.89807 | 0.05504 |
| 1350.46901 | 0.06181 |
| 1349.03994 | 0.06902 |
| 1347.61087 | 0.07664 |
| 1346.1818  | 0.08462 |
| 1344.75273 | 0.09296 |
| 1343.32367 | 0.10175 |
| 1341.8946  | 0.11123 |
| 1340.46553 | 0.12166 |
| 1339.03646 | 0.13298 |
| 1337.6074  | 0.14479 |
| 1336.17833 | 0.15684 |
| 1334.74926 | 0.16927 |
| 1333.32019 | 0.18225 |
| 1331.89113 | 0.19579 |
| 1330.46206 | 0.20982 |
| 1329.03299 | 0.22434 |
| 1327.60392 | 0.23932 |
| 1326.17485 | 0.25475 |
| 1324.74579 | 0.27068 |
| 1323.31672 | 0.28706 |
| 1321.88765 | 0.30377 |
| 1320.45858 | 0.3209  |
| 1319.02952 | 0.33858 |
| 1317.60045 | 0.3567  |
| 1316.17138 | 0.37495 |
| 1314.74231 | 0.39325 |
| 1313.31324 | 0.41171 |
| 1311.88418 | 0.43031 |
| 1310.45511 | 0.44889 |
| 1309.02604 | 0.46732 |
| 1307.59697 | 0.48563 |
| 1306.16791 | 0.50376 |
| 1304.73884 | 0.52156 |
| 1303.30977 | 0.53886 |
| 1301.8807  | 0.55559 |
| 1300.45164 | 0.57165 |

|            |         |
|------------|---------|
| 1299.02257 | 0.58703 |
| 1297.5935  | 0.60172 |
| 1296.16443 | 0.61557 |
| 1294.73536 | 0.62839 |
| 1293.3063  | 0.64013 |
| 1291.87723 | 0.65087 |
| 1290.44816 | 0.6607  |
| 1289.01909 | 0.66965 |
| 1287.59003 | 0.67768 |
| 1286.16096 | 0.68475 |
| 1284.73189 | 0.69095 |
| 1283.30282 | 0.69649 |
| 1281.87375 | 0.7016  |
| 1280.44469 | 0.70642 |
| 1279.01562 | 0.71101 |
| 1277.58655 | 0.71516 |
| 1276.15748 | 0.71861 |
| 1274.72842 | 0.72114 |
| 1273.29935 | 0.72268 |
| 1271.87028 | 0.72323 |
| 1270.44121 | 0.72275 |
| 1269.01215 | 0.72111 |
| 1267.58308 | 0.71817 |
| 1266.15401 | 0.71382 |
| 1264.72494 | 0.70785 |
| 1263.29587 | 0.69998 |
| 1261.86681 | 0.68998 |
| 1260.43774 | 0.67756 |
| 1259.00867 | 0.66243 |
| 1257.5796  | 0.64426 |
| 1256.15054 | 0.62276 |
| 1254.72147 | 0.59769 |
| 1253.2924  | 0.569   |
| 1251.86333 | 0.53687 |
| 1250.43426 | 0.5017  |
| 1249.0052  | 0.46403 |
| 1247.57613 | 0.42454 |
| 1246.14706 | 0.38404 |
| 1244.71799 | 0.34341 |
| 1243.28893 | 0.30361 |
| 1241.85986 | 0.26556 |
| 1240.43079 | 0.23002 |
| 1239.00172 | 0.19767 |
| 1237.57265 | 0.16902 |
| 1236.14359 | 0.14443 |
| 1234.71452 | 0.12401 |
| 1233.28545 | 0.10767 |
| 1231.85638 | 0.09513 |
| 1230.42732 | 0.08588 |
| 1228.99825 | 0.07924 |
| 1227.56918 | 0.07453 |
| 1226.14011 | 0.0712  |
| 1224.71105 | 0.06873 |
| 1223.28198 | 0.06669 |

|            |         |
|------------|---------|
| 1221.85291 | 0.06464 |
| 1220.42384 | 0.06223 |
| 1218.99477 | 0.0592  |
| 1217.56571 | 0.05542 |
| 1216.13664 | 0.05092 |
| 1214.70757 | 0.04583 |
| 1213.2785  | 0.04033 |
| 1211.84944 | 0.03459 |
| 1210.42037 | 0.02887 |
| 1208.9913  | 0.02336 |
| 1207.56223 | 0.01819 |
| 1206.13316 | 0.01352 |
| 1204.7041  | 0.00955 |
| 1203.27503 | 0.00649 |
| 1201.84596 | 0.00441 |
| 1200.41689 | 0.00312 |
| 1198.98783 | 0.0023  |
| 1197.55876 | 0.0017  |
| 1196.12969 | 0.00129 |
| 1194.70062 | 0.00104 |
| 1193.27156 | 0.00102 |
| 1191.84249 | 0.00129 |
| 1190.41342 | 0.00191 |
| 1188.98435 | 0.00296 |
| 1187.55528 | 0.00464 |
| 1186.12622 | 0.00732 |
| 1184.69715 | 0.01141 |
| 1183.26808 | 0.01744 |
| 1181.83901 | 0.02592 |
| 1180.40995 | 0.03718 |
| 1178.98088 | 0.05119 |
| 1177.55181 | 0.06768 |
| 1176.12274 | 0.08605 |
| 1174.69367 | 0.10544 |
| 1173.26461 | 0.12477 |
| 1171.83554 | 0.14316 |
| 1170.40647 | 0.16015 |
| 1168.9774  | 0.17573 |
| 1167.54834 | 0.19017 |
| 1166.11927 | 0.2038  |
| 1164.6902  | 0.21684 |
| 1163.26113 | 0.2295  |
| 1161.83207 | 0.24206 |
| 1160.403   | 0.25491 |
| 1158.97393 | 0.26832 |
| 1157.54486 | 0.28247 |
| 1156.11579 | 0.29747 |
| 1154.68673 | 0.31339 |
| 1153.25766 | 0.33038 |
| 1151.82859 | 0.3486  |
| 1150.39952 | 0.36809 |
| 1148.97046 | 0.38865 |
| 1147.54139 | 0.41014 |
| 1146.11232 | 0.43257 |

|            |         |
|------------|---------|
| 1144.68325 | 0.45601 |
| 1143.25418 | 0.48042 |
| 1141.82512 | 0.50577 |
| 1140.39605 | 0.53201 |
| 1138.96698 | 0.55888 |
| 1137.53791 | 0.58575 |
| 1136.10885 | 0.612   |
| 1134.67978 | 0.63725 |
| 1133.25071 | 0.66128 |
| 1131.82164 | 0.68376 |
| 1130.39258 | 0.70429 |
| 1128.96351 | 0.7224  |
| 1127.53444 | 0.73745 |
| 1126.10537 | 0.74876 |
| 1124.6763  | 0.75581 |
| 1123.24724 | 0.75862 |
| 1121.81817 | 0.75799 |
| 1120.3891  | 0.75575 |
| 1118.96003 | 0.75481 |
| 1117.53097 | 0.75822 |
| 1116.1019  | 0.76767 |
| 1114.67283 | 0.78255 |
| 1113.24376 | 0.80071 |
| 1111.81469 | 0.81975 |
| 1110.38563 | 0.8379  |
| 1108.95656 | 0.85423 |
| 1107.52749 | 0.86859 |
| 1106.09842 | 0.88129 |
| 1104.66936 | 0.89274 |
| 1103.24029 | 0.90319 |
| 1101.81122 | 0.91274 |
| 1100.38215 | 0.92153 |
| 1098.95309 | 0.92976 |
| 1097.52402 | 0.93763 |
| 1096.09495 | 0.94517 |
| 1094.66588 | 0.95223 |
| 1093.23681 | 0.9586  |
| 1091.80775 | 0.96424 |
| 1090.37868 | 0.96932 |
| 1088.94961 | 0.97398 |
| 1087.52054 | 0.97824 |
| 1086.09148 | 0.98202 |
| 1084.66241 | 0.98524 |
| 1083.23334 | 0.98784 |
| 1081.80427 | 0.98995 |
| 1080.3752  | 0.99185 |
| 1078.94614 | 0.99368 |
| 1077.51707 | 0.9954  |
| 1076.088   | 0.9969  |
| 1074.65893 | 0.99817 |
| 1073.22987 | 0.99921 |
| 1071.8008  | 1       |
| 1070.37173 | 1.00066 |
| 1068.94266 | 1.00142 |

|            |         |
|------------|---------|
| 1067.51359 | 1.00207 |
| 1066.08453 | 1.00239 |
| 1064.65546 | 1.00231 |
| 1063.22639 | 1.00191 |
| 1061.79732 | 1.00137 |
| 1060.36826 | 1.00081 |
| 1058.93919 | 1.00024 |
| 1057.51012 | 0.99958 |
| 1056.08105 | 0.99885 |
| 1054.65199 | 0.99817 |
| 1053.22292 | 0.99765 |
| 1051.79385 | 0.99729 |
| 1050.36478 | 0.99709 |
| 1048.93571 | 0.99706 |
| 1047.50665 | 0.99718 |
| 1046.07758 | 0.99738 |
| 1044.64851 | 0.99757 |
| 1043.21944 | 0.99836 |
| 1041.79038 | 0.99896 |
| 1040.36131 | 0.99979 |
| 1038.93224 | 1.00033 |
| 1037.50317 | 1.00045 |
| 1036.0741  | 1.00016 |
| 1034.64504 | 0.99954 |
| 1033.21597 | 0.99873 |
| 1031.7869  | 0.99788 |
| 1030.35783 | 0.99698 |
| 1028.92877 | 0.99592 |
| 1027.4997  | 0.9946  |
| 1026.07063 | 0.99311 |
| 1024.64156 | 0.99157 |
| 1023.2125  | 0.99012 |
| 1021.78343 | 0.98885 |
| 1020.35436 | 0.98778 |
| 1018.92529 | 0.9869  |
| 1017.49622 | 0.98623 |
| 1016.06716 | 0.98585 |
| 1014.63809 | 0.98583 |
| 1013.20902 | 0.98619 |
| 1011.77995 | 0.98693 |
| 1010.35089 | 0.98803 |
| 1008.92182 | 0.98946 |
| 1007.49275 | 0.99115 |
| 1006.06368 | 0.99295 |
| 1004.63461 | 0.99463 |
| 1003.20555 | 0.99602 |
| 1001.77648 | 0.99701 |
| 1000.34741 | 0.99762 |
| 998.91834  | 0.99781 |
| 997.48928  | 0.99757 |
| 996.06021  | 0.99692 |
| 994.63114  | 0.99584 |
| 993.20207  | 0.99435 |
| 991.77301  | 0.99249 |

|           |         |
|-----------|---------|
| 990.34394 | 0.99037 |
| 988.91487 | 0.98811 |
| 987.4858  | 0.9888  |
| 986.05673 | 0.98956 |
| 984.62767 | 0.9904  |
| 983.1986  | 0.99127 |
| 981.76953 | 0.99213 |
| 980.34046 | 0.99296 |
| 978.9114  | 0.99377 |
| 977.48233 | 0.99459 |
| 976.05326 | 0.99543 |
| 974.62419 | 0.99624 |
| 973.19512 | 0.99692 |
| 971.76606 | 0.99785 |
| 970.33699 | 0.99891 |
| 968.90792 | 1       |
| 967.47885 | 1.00113 |
| 966.04979 | 1.00185 |
| 964.62072 | 1.00227 |
| 963.19165 | 1.00256 |
| 961.76258 | 1.0029  |
| 960.33352 | 1.00339 |
| 958.90445 | 1.00395 |
| 957.47538 | 1.00445 |
| 956.04631 | 1.00479 |
| 954.61724 | 1.00491 |
| 953.18818 | 1.00484 |
| 951.75911 | 1.00462 |
| 950.33004 | 1.00429 |
| 948.90097 | 1.00384 |
| 947.47191 | 1.00327 |
| 946.04284 | 1.00261 |
| 944.61377 | 1.00185 |
| 943.1847  | 1.00095 |
| 941.75563 | 0.99989 |
| 940.32657 | 0.99862 |
| 938.8975  | 0.99709 |
| 937.46843 | 0.99525 |
| 936.03936 | 0.99306 |
| 934.6103  | 0.9905  |
| 933.18123 | 0.98755 |
| 931.75216 | 0.98432 |
| 930.32309 | 0.98098 |
| 928.89403 | 0.97766 |
| 927.46496 | 0.97442 |
| 926.03589 | 0.97115 |
| 924.60682 | 0.9677  |
| 923.17775 | 0.96398 |
| 921.74869 | 0.95991 |
| 920.31962 | 0.95538 |
| 918.89055 | 0.95026 |
| 917.46148 | 0.94444 |
| 916.03242 | 0.93791 |
| 914.60335 | 0.93069 |

|           |         |
|-----------|---------|
| 913.17428 | 0.92281 |
| 911.74521 | 0.91422 |
| 910.31614 | 0.90483 |
| 908.88708 | 0.89462 |
| 907.45801 | 0.88354 |
| 906.02894 | 0.87155 |
| 904.59987 | 0.85859 |
| 903.17081 | 0.84467 |
| 901.74174 | 0.82976 |
| 900.31267 | 0.8137  |
| 898.8836  | 0.79599 |
| 897.45454 | 0.77577 |
| 896.02547 | 0.75168 |
| 894.5964  | 0.72149 |
| 893.16733 | 0.68156 |
| 891.73826 | 0.62672 |
| 890.3092  | 0.55198 |
| 888.88013 | 0.45737 |
| 887.45106 | 0.35386 |
| 886.02199 | 0.2634  |
| 884.59293 | 0.20897 |
| 883.16386 | 0.2007  |
| 881.73479 | 0.23006 |
| 880.30572 | 0.27769 |
| 878.87665 | 0.32758 |
| 877.44759 | 0.37351 |
| 876.01852 | 0.41366 |
| 874.58945 | 0.44377 |
| 873.16038 | 0.45864 |
| 871.73132 | 0.45774 |
| 870.30225 | 0.44577 |
| 868.87318 | 0.42823 |
| 867.44411 | 0.40821 |
| 866.01504 | 0.38652 |
| 864.58598 | 0.36293 |
| 863.15691 | 0.33717 |
| 861.72784 | 0.30951 |
| 860.29877 | 0.28077 |
| 858.86971 | 0.25213 |
| 857.44064 | 0.22473 |
| 856.01157 | 0.19946 |
| 854.5825  | 0.17679 |
| 853.15344 | 0.15687 |
| 851.72437 | 0.13958 |
| 850.2953  | 0.12469 |
| 848.86623 | 0.11202 |
| 847.43716 | 0.10142 |
| 846.0081  | 0.0925  |
| 844.57903 | 0.0846  |
| 843.14996 | 0.07718 |
| 841.72089 | 0.07005 |
| 840.29183 | 0.06321 |
| 838.86276 | 0.05666 |
| 837.43369 | 0.05044 |



|           |         |
|-----------|---------|
| 836.00462 | 0.04469 |
| 834.57555 | 0.03955 |
| 833.14649 | 0.03507 |
| 831.71742 | 0.0312  |
| 830.28835 | 0.02787 |
| 828.85928 | 0.02499 |
| 827.43022 | 0.0225  |
| 826.00115 | 0.02034 |
| 824.57208 | 0.01851 |
| 823.14301 | 0.01698 |
| 821.71395 | 0.01568 |
| 820.28488 | 0.01455 |
| 818.85581 | 0.01356 |
| 817.42674 | 0.01278 |
| 815.99767 | 0.01227 |
| 814.56861 | 0.01201 |
| 813.13954 | 0.01186 |
| 811.71047 | 0.01165 |
| 810.2814  | 0.0114  |
| 808.85234 | 0.0113  |
| 807.42327 | 0.01147 |
| 805.9942  | 0.01184 |
| 804.56513 | 0.01222 |
| 803.13606 | 0.0125  |
| 801.707   | 0.01274 |
| 800.27793 | 0.01309 |
| 798.84886 | 0.01362 |
| 797.41979 | 0.01422 |
| 795.99073 | 0.01476 |
| 794.56166 | 0.01522 |
| 793.13259 | 0.0157  |
| 791.70352 | 0.01622 |
| 790.27446 | 0.01677 |
| 788.84539 | 0.01734 |
| 787.41632 | 0.01796 |
| 785.98725 | 0.01871 |
| 784.55818 | 0.01959 |
| 783.12912 | 0.02055 |
| 781.70005 | 0.02153 |
| 780.27098 | 0.02255 |
| 778.84191 | 0.02361 |
| 777.41285 | 0.0247  |
| 775.98378 | 0.02579 |
| 774.55471 | 0.02681 |
| 773.12564 | 0.02776 |
| 771.69657 | 0.02877 |
| 770.26751 | 0.02995 |
| 768.83844 | 0.03124 |
| 767.40937 | 0.03256 |
| 765.9803  | 0.03389 |
| 764.55124 | 0.03525 |
| 763.12217 | 0.0366  |
| 761.6931  | 0.03781 |
| 760.26403 | 0.03879 |

|           |         |
|-----------|---------|
| 758.83497 | 0.03963 |
| 757.4059  | 0.04052 |
| 755.97683 | 0.04158 |
| 754.54776 | 0.04283 |
| 753.11869 | 0.04429 |
| 751.68963 | 0.04589 |
| 750.26056 | 0.04748 |
| 748.83149 | 0.04906 |
| 747.40242 | 0.05064 |
| 745.97336 | 0.05231 |
| 744.54429 | 0.05419 |
| 743.11522 | 0.05627 |
| 741.68615 | 0.05845 |
| 740.25708 | 0.06064 |
| 738.82802 | 0.06287 |
| 737.39895 | 0.06515 |
| 735.96988 | 0.06749 |
| 734.54081 | 0.06993 |
| 733.11175 | 0.0725  |
| 731.68268 | 0.0753  |
| 730.25361 | 0.07843 |
| 728.82454 | 0.08191 |
| 727.39548 | 0.08574 |
| 725.96641 | 0.08985 |
| 724.53734 | 0.09409 |
| 723.10827 | 0.09849 |
| 721.6792  | 0.10334 |
| 720.25014 | 0.10889 |
| 718.82107 | 0.11513 |
| 717.392   | 0.12196 |
| 715.96293 | 0.12929 |
| 714.53387 | 0.1372  |
| 713.1048  | 0.14592 |
| 711.67573 | 0.15566 |
| 710.24666 | 0.16653 |
| 708.81759 | 0.17848 |
| 707.38853 | 0.19154 |
| 705.95946 | 0.20576 |
| 704.53039 | 0.22107 |
| 703.10132 | 0.23717 |
| 701.67226 | 0.25377 |
| 700.24319 | 0.27083 |
| 698.81412 | 0.28843 |
| 697.38505 | 0.30643 |
| 695.95598 | 0.32456 |
| 694.52692 | 0.34242 |
| 693.09785 | 0.35951 |
| 691.66878 | 0.37516 |
| 690.23971 | 0.38855 |
| 688.81065 | 0.39859 |
| 687.38158 | 0.40392 |
| 685.95251 | 0.40336 |
| 684.52344 | 0.39643 |
| 683.09438 | 0.38376 |

|           |         |
|-----------|---------|
| 681.66531 | 0.36723 |
| 680.23624 | 0.34987 |
| 678.80717 | 0.33521 |
| 677.3781  | 0.326   |
| 675.94904 | 0.32311 |
| 674.51997 | 0.32544 |
| 673.0909  | 0.33065 |
| 671.66183 | 0.33664 |
| 670.23277 | 0.3429  |
| 668.8037  | 0.3494  |
| 667.37463 | 0.35241 |
| 665.94556 | 0.34716 |
| 664.51649 | 0.33338 |
| 663.08743 | 0.31083 |
| 661.65836 | 0.27964 |
| 660.22929 | 0.24351 |
| 658.80022 | 0.20794 |
| 657.37116 | 0.17697 |
| 655.94209 | 0.15249 |
| 654.51302 | 0.1347  |
| 653.08395 | 0.12292 |
| 651.65489 | 0.1162  |
| 650.22582 | 0.1135  |
| 648.79675 | 0.11411 |
| 647.36768 | 0.11757 |
| 645.93861 | 0.12336 |
| 644.50955 | 0.13106 |
| 643.08048 | 0.14076 |
| 641.65141 | 0.15316 |
| 640.22234 | 0.16949 |
| 638.79328 | 0.19112 |
| 637.36421 | 0.21929 |
| 635.93514 | 0.25496 |
| 634.50607 | 0.29801 |
| 633.077   | 0.34662 |
| 631.64794 | 0.39775 |
| 630.21887 | 0.44814 |
| 628.7898  | 0.49531 |
| 627.36073 | 0.53813 |
| 625.93167 | 0.57643 |
| 624.5026  | 0.61036 |
| 623.07353 | 0.64019 |
| 621.64446 | 0.66631 |
| 620.2154  | 0.68938 |
| 618.78633 | 0.71022 |
| 617.35726 | 0.72934 |
| 615.92819 | 0.74672 |
| 614.49912 | 0.76243 |
| 613.07006 | 0.77685 |
| 611.64099 | 0.79048 |
| 610.21192 | 0.80361 |
| 608.78285 | 0.81621 |
| 607.35379 | 0.82813 |
| 605.92472 | 0.83932 |

|           |         |
|-----------|---------|
| 604.49565 | 0.84973 |
| 603.06658 | 0.85938 |
| 601.63751 | 0.86867 |
| 600.20845 | 0.87804 |
| 598.77938 | 0.88762 |
| 597.35031 | 0.89725 |
| 595.92124 | 0.90657 |
| 594.49218 | 0.91527 |
| 593.06311 | 0.92334 |
| 591.63404 | 0.93107 |
| 590.20497 | 0.93852 |
| 588.77591 | 0.94561 |
| 587.34684 | 0.95234 |
| 585.91777 | 0.95865 |
| 584.4887  | 0.96438 |
| 583.05963 | 0.96942 |
| 581.63057 | 0.97369 |
| 580.2015  | 0.97719 |
| 578.77243 | 0.97979 |
| 577.34336 | 0.9811  |
| 575.9143  | 0.98082 |
| 574.48523 | 0.97882 |
| 573.05616 | 0.97448 |
| 571.62709 | 0.9665  |
| 570.19802 | 0.95347 |
| 568.76896 | 0.93418 |
| 567.33989 | 0.90727 |
| 565.91082 | 0.87106 |
| 564.48175 | 0.82343 |
| 563.05269 | 0.7624  |
| 561.62362 | 0.68776 |
| 560.19455 | 0.60241 |
| 558.76548 | 0.51223 |
| 557.33642 | 0.42448 |
| 555.90735 | 0.34545 |
| 554.47828 | 0.27855 |
| 553.04921 | 0.22431 |
| 551.62014 | 0.18198 |
| 550.19108 | 0.15128 |
| 548.76201 | 0.13291 |
| 547.33294 | 0.12784 |
| 545.90387 | 0.13661 |
| 544.47481 | 0.15916 |
| 543.04574 | 0.19455 |
| 541.61667 | 0.24075 |
| 540.1876  | 0.29486 |
| 538.75853 | 0.35355 |
| 537.32947 | 0.41359 |
| 535.9004  | 0.4722  |
| 534.47133 | 0.52727 |
| 533.04226 | 0.57757 |
| 531.6132  | 0.62262 |
| 530.18413 | 0.66246 |
| 528.75506 | 0.69772 |

|           |         |
|-----------|---------|
| 527.32599 | 0.72951 |
| 525.89692 | 0.7584  |
| 524.46786 | 0.78385 |
| 523.03879 | 0.80531 |
| 521.60972 | 0.82336 |
| 520.18065 | 0.83911 |
| 518.75159 | 0.85326 |
| 517.32252 | 0.86602 |
| 515.89345 | 0.87748 |
| 514.46438 | 0.88772 |
| 513.03532 | 0.89705 |
| 511.60625 | 0.906   |
| 510.17718 | 0.91486 |
| 508.74811 | 0.92355 |
| 507.31904 | 0.93174 |
| 505.88998 | 0.93907 |
| 504.46091 | 0.94563 |
| 503.03184 | 0.95227 |
| 501.60277 | 0.95959 |
| 500.17371 | 0.96695 |
| 498.74464 | 0.97337 |
| 497.31557 | 0.97853 |
| 495.8865  | 0.98264 |
| 494.45743 | 0.986   |
| 493.02837 | 0.98896 |
| 491.5993  | 0.99174 |
| 490.17023 | 0.9944  |
| 488.74116 | 0.99678 |
| 487.3121  | 0.99864 |
| 485.88303 | 1       |
| 484.45396 | 1.00134 |
| 483.02489 | 1.00278 |
| 481.59583 | 1.0039  |
| 480.16676 | 1.00495 |
| 478.73769 | 1.00643 |
| 477.30862 | 1.008   |
| 475.87955 | 1.00937 |
| 474.45049 | 1.00972 |
| 473.02142 | 1.00933 |
| 471.59235 | 1.0091  |
| 470.16328 | 1.00937 |
| 468.73422 | 1.01015 |
| 467.30515 | 1.01134 |
| 465.87608 | 1.01246 |
| 464.44701 | 1.01283 |
| 463.01794 | 1.01239 |
| 461.58888 | 1.01134 |
| 460.15981 | 1.00986 |
| 458.73074 | 1.00868 |
| 457.30167 | 1.00895 |
| 455.87261 | 1.01054 |
| 454.44354 | 1.01202 |
| 453.01447 | 1.01251 |
| 451.5854  | 1.012   |

|           |         |
|-----------|---------|
| 450.15634 | 1.01075 |
| 448.72727 | 1.00897 |
| 447.2982  | 1.00693 |
| 445.86913 | 1.00506 |
| 444.44006 | 1.00384 |
| 443.011   | 1.00346 |
| 441.58193 | 1.00346 |
| 440.15286 | 1.00306 |
| 438.72379 | 1.00186 |
| 437.29473 | 1.00002 |
| 435.86566 | 0.99811 |
| 434.43659 | 0.99676 |
| 433.00752 | 0.99629 |
| 431.57845 | 0.99673 |
| 430.14939 | 0.99837 |
| 428.72032 | 1       |
| 427.29125 | 1.00133 |
| 425.86218 | 1.00143 |
| 424.43312 | 0.99993 |
| 423.00405 | 0.99735 |
| 421.57498 | 0.99522 |
| 420.14591 | 0.99542 |
| 418.71685 | 0.99865 |
| 417.28778 | 1.00299 |
| 415.85871 | 1.00607 |
| 414.42964 | 1.00734 |
| 413.00057 | 1.00699 |
| 411.57151 | 1.00559 |
| 410.14244 | 1.00434 |
| 408.71337 | 1.00408 |
| 407.2843  | 1.00462 |
| 405.85524 | 1.00527 |
| 404.42617 | 1.00547 |
| 402.9971  | 1.00478 |
| 401.56803 | 1.00312 |
| 400.13896 | 1.00117 |
| 398.7099  | 1       |
