# Supplementary material for: Enhanced Thermal Insulation and Flame-Retardant Properties of Polyvinyl Alcohol-Based Aerogels Composited with Ammonium Polyphosphate and Chitosan
Source: Hindawi journal article supplement (doi:10.1155/2021/5555916), 2021-05-28
Supplement: f1 [file 5555916.f1.zip]

|           | 0                 | 5                 | 10                |
|-----------|-------------------|-------------------|-------------------|
| Frequency | Complex Viscosity | Complex Viscosity | Complex Viscosity |
| 628.319   | 9655.99           | 48514.1           | 77954.2           |
| 499.091   | 11929.3           | 62241.7           | 101837            |
| 396.442   | 14691.8           | 78646.3           | 131376            |
| 314.905   | 17947.1           | 97828.6           | 166797            |
| 250.138   | 21985.9           | 121929            | 211459            |
| 198.692   | 26951.2           | 150663            | 265312            |
| 157.826   | 32856.9           | 185135            | 331404            |
| 125.366   | 40184.9           | 228025            | 412242            |
| 99.5818   | 49142.4           | 281066            | 510347            |
| 79.1006   | 59873.8           | 346001            | 630092            |
| 62.8319   | 73619.4           | 425594            | 775904            |
| 49.9091   | 89870.3           | 523326            | 957693            |
| 39.6442   | 109379            | 644173            | 1.18E+06          |
| 31.4905   | 136643            | 793940            | 1.46E+06          |
| 25.0138   | 166520            | 978387            | 1.80E+06          |
| 19.8692   | 202248            | 1.20E+06          | 2.23E+06          |
| 15.7826   | 246678            | 1.48E+06          | 2.74E+06          |
| 12.5366   | 300398            | 1.82E+06          | 3.41E+06          |
| 9.95818   | 365112            | 2.24E+06          | 4.20E+06          |
| 7.91006   | 444794            | 2.76E+06          | 5.21E+06          |
| 6.28319   | 542017            | 3.38E+06          | 6.44E+06          |
| 4.99091   | 658588            | 4.13E+06          | 8.00E+06          |
| 3.96442   | 798737            | 5.06E+06          | 9.79E+06          |
| 3.14905   | 967305            | 6.14E+06          | 1.21E+07          |
| 2.50138   | 1.18E+06          | 7.50E+06          | 1.50E+07          |
| 1.98692   | 1.43E+06          | 9.18E+06          | 1.85E+07          |
| 1.57826   | 1.76E+06          | 1.12E+07          | 2.26E+07          |
| 1.25366   | 2.15E+06          | 1.37E+07          | 2.76E+07          |
| 0.99582   | 2.68E+06          | 1.68E+07          | 3.42E+07          |
| 0.79101   | 3.24E+06          | 2.05E+07          | 4.17E+07          |
| 0.62832   | 4.06E+06          | 2.52E+07          | 5.05E+07          |
| 0.49909   | 4.97E+06          | 3.00E+07          | 6.19E+07          |
| 0.39644   | 6.35E+06          | 3.67E+07          | 7.78E+07          |
| 0.3149    | 7.98E+06          | 4.46E+07          | 9.27E+07          |
| 0.25014   | 1.05E+07          | 5.50E+07          | 1.14E+08          |
| 0.19869   | 1.32E+07          | 6.66E+07          | 1.39E+08          |
| 0.15783   | 1.81E+07          | 8.13E+07          | 1.68E+08          |
| 0.12537   | 2.33E+07          | 1.00E+08          | 2.09E+08          |
| 0.09958   | 2.86E+07          | 1.22E+08          | 2.39E+08          |
| 0.0791    | 3.92E+07          | 1.49E+08          | 3.03E+08          |
| 0.06283   | 5.53E+07          | 1.79E+08          | 3.43E+08          |









| 15                |           | 0            | 5            |
|-------------------|-----------|--------------|--------------|
| Complex Viscosity | Frequency | Loss Modulus | Loss Modulus |
| 94751.9           | 628.319   | 1.64E+06     | 1.19E+06     |
| 125850            | 499.091   | 1.59E+06     | 1.27E+06     |
| 164776            | 396.442   | 1.63E+06     | 2.05E+06     |
| 211054            | 314.905   | 1.59E+06     | 2.13E+06     |
| 268933            | 250.138   | 1.57E+06     | 2.60E+06     |
| 339255            | 198.692   | 1.55E+06     | 2.99E+06     |
| 423127            | 157.826   | 1.52E+06     | 3.32E+06     |
| 526263            | 125.366   | 1.49E+06     | 3.59E+06     |
| 651092            | 99.5818   | 1.45E+06     | 3.80E+06     |
| 805359            | 79.1006   | 1.42E+06     | 3.95E+06     |
| 994438            | 62.8319   | 1.40E+06     | 4.06E+06     |
| 1.23E+06          | 49.9091   | 1.36E+06     | 4.15E+06     |
| 1.51E+06          | 39.6442   | 1.32E+06     | 4.22E+06     |
| 1.87E+06          | 31.4905   | 1.32E+06     | 4.27E+06     |
| 2.30E+06          | 25.0138   | 1.28E+06     | 4.30E+06     |
| 2.84E+06          | 19.8692   | 1.24E+06     | 4.32E+06     |
| 3.51E+06          | 15.7826   | 1.20E+06     | 4.33E+06     |
| 4.33E+06          | 12.5366   | 1.16E+06     | 4.33E+06     |
| 5.33E+06          | 9.95818   | 1.11E+06     | 4.33E+06     |
| 6.58E+06          | 7.91006   | 1.07E+06     | 4.34E+06     |
| 8.12E+06          | 6.28319   | 1.03E+06     | 4.34E+06     |
| 1.01E+07          | 4.99091   | 997959       | 4.33E+06     |
| 1.24E+07          | 3.96442   | 953338       | 4.32E+06     |
| 1.53E+07          | 3.14905   | 906738       | 4.29E+06     |
| 1.89E+07          | 2.50138   | 872614       | 4.32E+06     |
| 2.32E+07          | 1.98692   | 835118       | 4.27E+06     |
| 2.88E+07          | 1.57826   | 818263       | 4.26E+06     |
| 3.53E+07          | 1.25366   | 794945       | 4.24E+06     |
| 4.33E+07          | 0.99582   | 777120       | 4.20E+06     |
| 5.40E+07          | 0.79101   | 747981       | 4.21E+06     |
| 6.54E+07          | 0.62832   | 754627       | 4.17E+06     |
| 8.13E+07          | 0.49909   | 732232       | 4.19E+06     |
| 1.02E+08          | 0.39644   | 747975       | 4.09E+06     |
| 1.25E+08          | 0.3149    | 770589       | 4.11E+06     |
| 1.50E+08          | 0.25014   | 817586       | 4.04E+06     |
| 1.88E+08          | 0.19869   | 845830       | 3.96E+06     |
| 2.33E+08          | 0.15783   | 956360       | 4.02E+06     |
| 3.24E+08          | 0.12537   | 1.02E+06     | 3.90E+06     |
| 3.57E+08          | 0.09958   | 983595       | 3.94E+06     |
|                   | 0.0791    | 1.17E+06     | 3.98E+06     |
|                   | 0.06283   | 1.21E+06     | 3.76E+06     |
|                   |           |              | 1.91023      |
|                   |           |              | 1.96604      |
|                   |           |              | 2.01665      |
|                   |           |              | 2.06358      |
|                   |           |              | 2.1225       |
|                   |           |              | 2.17278      |
|                   |           |              | 2.21425      |
|                   |           |              | 2.26253      |
|                   |           |              | 2.3123       |
|                   |           |              | 2.36151      |
|                   |           |              | 2.39768      |

2. 4406  
2. 48812  
2. 52077  
2. 57638  
2. 61524  
2. 66071  
2. 69081  
2. 73443  
2. 77783  
2. 81532  
2. 85251  
2. 88978  
2. 92321  
2. 95639  
2. 99925  
3. 0369  
3. 06885  
3. 10244  
3. 13153  
3. 17242  
3. 20594  
3. 24103  
3. 28574  
3. 30447  
3. 33722  
3. 35863  
3. 40021  
3. 43189  
3. 46777  
3. 48554  
3. 52994  
3. 54687  
3. 57957  
3. 60481  
3. 62281  
3. 6555  
3. 68052  
3. 71273  
3. 73199  
3. 76511  
3. 77825  
3. 81424  
3. 83764  
3. 86376  
3. 88166  
3. 92056  
3. 94156  
3. 94536  
3. 96536  
4. 0058  
4. 02179  
4. 03444  
4. 06236  
4. 08899

4. 09499  
4. 12388  
4. 14148  
4. 15821  
4. 17422  
4. 19841  
4. 20094  
4. 23276  
4. 24323  
4. 25523  
4. 27509  
4. 29108  
4. 31138  
4. 32902  
4. 34705  
4. 35612  
4. 36869  
4. 38841  
4. 36004  
4. 39262  
4. 42433  
4. 437  
4. 44944  
4. 45929  
4. 48415  
4. 49972  
4. 49704  
4. 51786  
4. 52687  
4. 53555  
4. 54744  
4. 53828  
4. 57801  
4. 59158  
4. 59191  
4. 58858  
4. 60607  
4. 61027  
4. 61164  
4. 63639  
4. 63775  
4. 64719  
4. 65619  
4. 65573  
4. 67313  
4. 68886  
4. 70611  
4. 72655  
4. 69884  
4. 70884  
4. 71063  
4. 72126  
4. 73011  
4. 75673



4. 74829  
4. 7528  
4. 76634  
4. 76142  
4. 7762  
4. 77807  
4. 748  
4. 79641  
4. 77869  
4. 77734  
4. 80062  
4. 80771  
4. 79459  
4. 80853  
4. 81747  
4. 80899  
4. 82567  
4. 82385  
4. 82599  
4. 84337  
4. 82833  
4. 83949  
4. 83335  
4. 83499  
4. 83853  
4. 83625  
4. 85375  
4. 8453  
4. 86726  
4. 85683  
4. 87399  
4. 86112  
4. 85287  
4. 83994  
4. 81771  
4. 81873  
4. 84039  
4. 84557  
4. 84615  
4. 84381  
4. 83896  
4. 83393  
4. 83831  
4. 86074  
4. 81975  
4. 79464  
4. 8068  
4. 80736  
4. 81866  
4. 80994  
4. 81541  
4. 81764  
4. 82739  
4. 82398

4. 80309  
4. 84254  
4. 78998  
4. 79162  
4. 7857  
4. 78398  
4. 79347  
4. 80627  
4. 79826  
4. 7942  
4. 79976  
4. 78847  
4. 78437  
4. 75429  
4. 77347  
4. 76478  
4. 75871  
4. 77342  
4. 7731  
4. 7662  
4. 76867  
4. 77867  
4. 77077  
4. 78025  
4. 76996  
4. 74219  
4. 73489

| 10           | 15           | 0                         |
|--------------|--------------|---------------------------|
| Loss Modulus | Loss Modulus | Frequency Storage Modulus |
| -2.9293E     | -5.39336E    | 99.5818 5.84E+06          |
| -3.06408E    | -6.06751E    | 79.1006 5.74E+06          |
| -1.86124E    | -4.48898E    | 62.8319 5.59E+06          |
| -862544      | -2.92838E    | 49.9091 5.42E+06          |
| 484316       | -732553      | 39.6442 5.27E+06          |
| 1.71E+06     | 1.25E+06     | 31.4905 5.13E+06          |
| 2.83E+06     | 3.00E+06     | 25.0138 4.96E+06          |
| 3.75E+06     | 4.60E+06     | 19.8692 4.81E+06          |
| 4.48E+06     | 5.72E+06     | 15.7826 4.67E+06          |
| 4.93E+06     | 6.55E+06     | 12.5366 4.52E+06          |
| 5.37E+06     | 7.13E+06     | 9.95818 4.41E+06          |
| 5.52E+06     | 7.49E+06     | 7.91006 4.27E+06          |
| 5.64E+06     | 7.69E+06     | 6.28319 4.13E+06          |
| 5.71E+06     | 7.72E+06     | 4.99091 4.09E+06          |
| 5.63E+06     | 7.74E+06     | 3.96442 3.96E+06          |
| 5.68E+06     | 7.74E+06     | 3.14905 3.82E+06          |
| 5.67E+06     | 7.85E+06     | 2.50138 3.70E+06          |
| 5.68E+06     | 7.94E+06     | 1.98692 3.58E+06          |
| 5.56E+06     | 7.73E+06     | 1.57826 3.46E+06          |
| 5.71E+06     | 7.95E+06     | 1.25366 3.35E+06          |
| 5.66E+06     | 7.97E+06     | 0.99582 3.24E+06          |
| 5.69E+06     | 7.24E+06     | 0.79101 3.13E+06          |
| 5.85E+06     | 8.14E+06     | 0.62832 3.02E+06          |
| 5.59E+06     | 7.96E+06     | 0.49909 2.91E+06          |
| 5.63E+06     | 7.86E+06     | 0.39644 2.81E+06          |
| 5.83E+06     | 7.81E+06     | 0.3149 2.72E+06           |
| 6.00E+06     | 7.92E+06     | 0.25014 2.65E+06          |
| 5.95E+06     | 7.99E+06     | 0.19869 2.57E+06          |
| 5.97E+06     | 7.58E+06     | 0.15783 2.55E+06          |
| 5.95E+06     | 7.80E+06     | 0.12537 2.45E+06          |
| 6.31E+06     | 7.80E+06     | 0.09958 2.44E+06          |
| 6.35E+06     | 1.13E+07     | 0.0791 2.37E+06           |
| 6.26E+06     | 8.62E+06     | 0.06283 2.40E+06          |
| 6.31E+06     | 7.58E+06     | 0.25014 2.49E+06          |
| 7.32E+06     | 9.66E+06     | 0.19869 2.48E+06          |
| 6.49E+06     | 8.83E+06     | 0.15783 2.68E+06          |
| 6.59E+06     | 9.62E+06     | 0.12537 2.74E+06          |
| 6.55E+06     | 1.10E+07     | 0.09958 2.67E+06          |
| 6.49E+06     | 1.64E+07     | 0.0791 2.87E+06           |
| 6.92E+06     |              | 0.06283 3.26E+06          |
| 5.88E+06     |              |                           |









| 5               | 10              | 15              |
|-----------------|-----------------|-----------------|
| Storage Modulus | Storage Modulus | Storage Modulus |
| 3.05E+07        | 4.89E+07        | 5.93E+07        |
| 3.10E+07        | 5.07E+07        | 6.25E+07        |
| 3.11E+07        | 5.20E+07        | 6.52E+07        |
| 3.07E+07        | 5.25E+07        | 6.64E+07        |
| 3.04E+07        | 5.29E+07        | 6.73E+07        |
| 2.98E+07        | 5.27E+07        | 6.74E+07        |
| 2.90E+07        | 5.22E+07        | 6.67E+07        |
| 2.84E+07        | 5.15E+07        | 6.58E+07        |
| 2.77E+07        | 5.06E+07        | 6.46E+07        |
| 2.71E+07        | 4.96E+07        | 6.34E+07        |
| 2.64E+07        | 4.85E+07        | 6.21E+07        |
| 2.58E+07        | 4.75E+07        | 6.07E+07        |
| 2.52E+07        | 4.65E+07        | 5.94E+07        |
| 2.46E+07        | 4.55E+07        | 5.83E+07        |
| 2.41E+07        | 4.47E+07        | 5.71E+07        |
| 2.35E+07        | 4.39E+07        | 5.59E+07        |
| 2.30E+07        | 4.29E+07        | 5.48E+07        |
| 2.24E+07        | 4.24E+07        | 5.37E+07        |
| 2.19E+07        | 4.15E+07        | 5.25E+07        |
| 2.14E+07        | 4.08E+07        | 5.14E+07        |
| 2.08E+07        | 4.00E+07        | 5.04E+07        |
| 2.01E+07        | 3.95E+07        | 4.97E+07        |
| 1.96E+07        | 3.84E+07        | 4.85E+07        |
| 1.89E+07        | 3.78E+07        | 4.75E+07        |
| 1.83E+07        | 3.70E+07        | 4.66E+07        |
| 1.77E+07        | 3.63E+07        | 4.55E+07        |
| 1.72E+07        | 3.52E+07        | 4.47E+07        |
| 1.67E+07        | 3.41E+07        | 4.35E+07        |
| 1.62E+07        | 3.36E+07        | 4.24E+07        |
| 1.57E+07        | 3.25E+07        | 4.20E+07        |
| 1.52E+07        | 3.11E+07        | 4.03E+07        |
| 1.44E+07        | 3.02E+07        | 3.90E+07        |
| 1.40E+07        | 3.02E+07        | 3.96E+07        |
| 1.34E+07        | 2.85E+07        | 3.87E+07        |
| 1.32E+07        | 2.75E+07        | 3.63E+07        |
| 1.26E+07        | 2.69E+07        | 3.62E+07        |
| 1.22E+07        | 2.57E+07        | 3.55E+07        |
| 1.20E+07        | 2.53E+07        | 3.91E+07        |
| 1.15E+07        | 2.29E+07        | 3.15E+07        |
| 1.11E+07        | 2.29E+07        |                 |
| 1.06E+07        | 2.07E+07        |                 |
