# Supplementary material for: Enhanced Thermal Insulation and Flame-Retardant Properties of Polyvinyl Alcohol-Based Aerogels Composited with Ammonium Polyphosphate and Chitosan
Source: Hindawi journal article supplement (doi:10.1155/2021/5555916), 2021-05-28
Supplement: f1 [file 5555916.f1.zip]

| Heat release rate |          |      |         |      |          |      |          |
|-------------------|----------|------|---------|------|----------|------|----------|
| 0                 |          | 5    |         | 10   |          | 15   |          |
| Time              | HRR      | Time | HRR     | Time | HRR      | Time | HRR      |
| 0                 | 31.98264 | 0    | 4.59266 | 0    | 11.34075 | 0    | 0.17173  |
| 1                 | 25.8308  | 1    | 1.07088 | 1    | 6.44775  | 1    | 4.23093  |
| 2                 | 19.3218  | 2    | 4.82017 | 2    | 5.54479  | 2    | 4.86182  |
| 3                 | 12.88041 | 3    | 3.69532 | 3    | 6.92715  | 3    | 2.12436  |
| 4                 | 7.12174  | 4    | 1.38179 | 4    | 5.74783  | 4    | 1.81362  |
| 5                 | 3.75137  | 5    | 1.94595 | 5    | 5.32701  | 5    | -0.22452 |
| 6                 | -0.23628 | 6    | 1.99027 | 6    | 5.42203  | 6    | 0.11994  |
| 7                 | 1.41263  | 7    | 2.48992 | 7    | 1.39434  | 7    | 1.49349  |
| 8                 | 6.45945  | 8    | 2.98653 | 8    | 1.91887  | 8    | 2.87175  |
| 9                 | 18.63682 | 9    | 3.84876 | 9    | 0.45889  | 9    | 3.11408  |
| 10                | 29.37672 | 10   | 2.6332  | 10   | 1.33764  | 10   | 2.9856   |
| 11                | 36.05073 | 11   | 0.71197 | 11   | 3.99543  | 11   | 1.6238   |
| 12                | 43.87344 | 12   | 1.93923 | 12   | 2.81354  | 12   | 1.48257  |
| 13                | 45.44955 | 13   | 4.63157 | 13   | 3.98312  | 13   | 3.69271  |
| 14                | 38.07961 | 14   | 1.65857 | 14   | 4.95245  | 14   | -0.00462 |
| 15                | 31.78416 | 15   | 2.73717 | 15   | 2.9889   | 15   | 1.92863  |
| 16                | 23.32036 | 16   | 1.28019 | 16   | 1.66429  | 16   | 3.12995  |
| 17                | 11.97671 | 17   | 4.46877 | 17   | 1.7102   | 17   | 3.28595  |
| 18                | 3.40056  | 18   | 2.2629  | 18   | 3.00288  | 18   | 1.43594  |
| 19                | -1.26778 | 19   | 1.60649 | 19   | 2.89325  | 19   | 2.76775  |
| 20                | 1.23431  | 20   | 1.24736 | 20   | 2.697    | 20   | 4.93918  |
| 21                | 11.00144 | 21   | 0.39202 | 21   | 3.27873  | 21   | 3.82306  |
| 22                | 19.87258 | 22   | 0.08903 | 22   | 3.68205  | 22   | 4.29871  |
| 23                | 32.54177 | 23   | 0.36707 | 23   | 4.99712  | 23   | 6.06779  |
| 24                | 42.26863 | 24   | 1.34412 | 24   | 2.45079  | 24   | 5.67311  |
| 25                | 42.48816 | 25   | 0.76427 | 25   | 0.53454  | 25   | 0.68027  |
| 26                | 42.75434 | 26   | 0.18687 | 26   | 2.25227  | 26   | 0.66989  |
| 27                | 41.13419 | 27   | 0.47769 | 27   | 1.02046  | 27   | 2.82828  |
| 28                | 35.99505 | 28   | 0.27526 | 28   | 2.69636  | 28   | 4.87304  |
| 29                | 26.4171  | 29   | 0.60348 | 29   | 2.27759  | 29   | 5.5721   |
| 30                | 17.15611 | 30   | 3.30426 | 30   | 2.84096  | 30   | 5.39035  |
| 31                | 11.64309 | 31   | 2.69362 | 31   | 1.8835   | 31   | 6.14883  |
| 32                | 11.26799 | 32   | 1.66184 | 32   | 3.77473  | 32   | 6.46092  |
| 33                | 16.92291 | 33   | 1.99011 | 33   | 17.10057 | 33   | 6.06997  |
| 34                | 24.8939  | 34   | 2.60907 | 34   | 19.25723 | 34   | 1.6154   |
| 35                | 32.08067 | 35   | 0.06166 | 35   | 1.39625  | 35   | 3.03203  |
| 36                | 31.89823 | 36   | 0.34112 | 36   | 1.15212  | 36   | 6.82292  |
| 37                | 39.1589  | 37   | 1.5152  | 37   | 0.60368  | 37   | 7.1129   |
| 38                | 45.77175 | 38   | 3.11802 | 38   | 0.65595  | 38   | 5.81058  |
| 39                | 39.87711 | 39   | 3.37918 | 39   | 2.59268  | 39   | 3.77179  |
| 40                | 31.24884 | 40   | 1.3489  | 40   | 2.31602  | 40   | 6.53971  |
| 41                | 18.77738 | 41   | 1.10137 | 41   | 0.419    | 41   | 8.58225  |
| 42                | 5.86169  | 42   | 1.54666 | 42   | 0.78185  | 42   | 10.64034 |
| 43                | 11.65566 | 43   | 1.1218  | 43   | 0.683    | 43   | 12.22984 |
| 44                | 37.22171 | 44   | 0.03858 | 44   | 1.99349  | 44   | 9.21597  |
| 45                | 40.33788 | 45   | 4.03701 | 45   | 3.73991  | 45   | 9.82782  |
| 46                | 37.62224 | 46   | 0.45178 | 46   | 6.82914  | 46   | 11.47205 |
| 47                | 46.19119 | 47   | 4.27824 | 47   | -0.00701 | 47   | 9.58082  |
| 48                | 45.54735 | 48   | 2.05769 | 48   | 3.51497  | 48   | 10.92747 |
| 49                | 46.96522 | 49   | 7.02822 | 49   | 4.45153  | 49   | 12.32855 |
| 50                | 38.351   | 50   | 6.36582 | 50   | -0.0575  | 50   | 12.90382 |

|     |           |     |           |     |          |     |          |
|-----|-----------|-----|-----------|-----|----------|-----|----------|
| 51  | 28.76615  | 51  | 2.20269   | 51  | 0.40311  | 51  | 11.49944 |
| 52  | 23.03099  | 52  | 1.36061   | 52  | 0.28355  | 52  | 7.84704  |
| 53  | 17.97903  | 53  | 0.89215   | 53  | 2.43899  | 53  | 7.95722  |
| 54  | 34.44126  | 54  | 0.3794    | 54  | 3.86615  | 54  | 8.2685   |
| 55  | 38.6462   | 55  | 0.65346   | 55  | 2.94516  | 55  | 7.59209  |
| 56  | 32.56453  | 56  | 1.7383    | 56  | 2.14332  | 56  | 9.47077  |
| 57  | 47.76483  | 57  | 3.13615   | 57  | 1.1262   | 57  | 12.76031 |
| 58  | 62.82646  | 58  | 1.7482    | 58  | 0.07419  | 58  | 14.06282 |
| 59  | 60.59805  | 59  | 3.03526   | 59  | 1.07037  | 59  | 10.66533 |
| 60  | 52.89922  | 60  | 2.63634   | 60  | 1.82416  | 60  | 10.55744 |
| 61  | 49.82504  | 61  | 1.08215   | 61  | 4.80226  | 61  | 11.91853 |
| 62  | 45.35871  | 62  | 2.53829   | 62  | 0.32782  | 62  | 10.07247 |
| 63  | 36.23069  | 63  | 3.22713   | 63  | 0.73992  | 63  | 10.61188 |
| 64  | 26.99624  | 64  | 3.85277   | 64  | 1.52721  | 64  | 13.6459  |
| 65  | 26.47953  | 65  | 5.0337    | 65  | 1.76011  | 65  | 11.12991 |
| 66  | 26.32397  | 66  | 5.18412   | 66  | 1.84666  | 66  | 9.58111  |
| 67  | 27.05387  | 67  | 3.29002   | 67  | 1.02358  | 67  | 11.39489 |
| 68  | 16.30104  | 68  | 2.43368   | 68  | 2.87176  | 68  | 11.49293 |
| 69  | 20.44799  | 69  | 1.98642   | 69  | 4.95385  | 69  | 13.88693 |
| 70  | 37.29977  | 70  | 3.46467   | 70  | 5.81995  | 70  | 14.03483 |
| 71  | 49.97559  | 71  | 7.03034   | 71  | 3.53885  | 71  | 11.18134 |
| 72  | 64.25672  | 72  | 10.93816  | 72  | 4.07676  | 72  | 8.71572  |
| 73  | 75.38171  | 73  | 10.77641  | 73  | 3.87111  | 73  | 7.01983  |
| 74  | 89.82944  | 74  | 11.20992  | 74  | 4.27783  | 74  | 8.046    |
| 75  | 100.80741 | 75  | 15.94153  | 75  | 3.80063  | 75  | 11.46174 |
| 76  | 110.44728 | 76  | 21.519    | 76  | 2.35137  | 76  | 9.55572  |
| 77  | 118.31301 | 77  | 25.9913   | 77  | 6.10413  | 77  | 7.87409  |
| 78  | 134.33856 | 78  | 34.13204  | 78  | 6.20719  | 78  | 9.23413  |
| 79  | 154.04751 | 79  | 44.95561  | 79  | 2.62477  | 79  | 11.40642 |
| 80  | 155.90395 | 80  | 49.48515  | 80  | 2.3639   | 80  | 10.36092 |
| 81  | 165.85149 | 81  | 56.14397  | 81  | 3.97641  | 81  | 11.91818 |
| 82  | 183.87556 | 82  | 68.82989  | 82  | 10.85246 | 82  | 10.86714 |
| 83  | 200.87471 | 83  | 81.9536   | 83  | 5.20128  | 83  | 6.35769  |
| 84  | 216.77488 | 84  | 93.48177  | 84  | 0.15375  | 84  | 3.95734  |
| 85  | 228.84527 | 85  | 103.75039 | 85  | 1.81871  | 85  | 3.30931  |
| 86  | 244.58755 | 86  | 114.79892 | 86  | 3.8025   | 86  | 8.81748  |
| 87  | 286.69964 | 87  | 125.75406 | 87  | 0.67744  | 87  | 20.82747 |
| 88  | 294.90341 | 88  | 131.39674 | 88  | 0.22258  | 88  | 18.82372 |
| 89  | 274.07061 | 89  | 140.04246 | 89  | 0.23537  | 89  | 10.01026 |
| 90  | 276.87658 | 90  | 148.53875 | 90  | 2.74605  | 90  | 7.21784  |
| 91  | 263.81656 | 91  | 158.81291 | 91  | 3.24876  | 91  | 5.24832  |
| 92  | 257.68422 | 92  | 165.67728 | 92  | 3.60419  | 92  | 6.44644  |
| 93  | 249.93794 | 93  | 165.41797 | 93  | 3.10446  | 93  | 8.78701  |
| 94  | 229.78914 | 94  | 169.38878 | 94  | 5.65898  | 94  | 7.01947  |
| 95  | 218.42534 | 95  | 174.09138 | 95  | 9.18113  | 95  | 7.87788  |
| 96  | 205.66004 | 96  | 176.57949 | 96  | 10.16662 | 96  | 7.00534  |
| 97  | 202.92081 | 97  | 180.47555 | 97  | 11.37625 | 97  | 4.42941  |
| 98  | 200.94053 | 98  | 180.91098 | 98  | 10.93467 | 98  | 4.52113  |
| 99  | 182.6418  | 99  | 181.84516 | 99  | 8.44832  | 99  | 4.45976  |
| 100 | 178.43878 | 100 | 186.4128  | 100 | 7.73949  | 100 | 1.18607  |
| 101 | 178.9629  | 101 | 185.28951 | 101 | 11.31958 | 101 | 2.12538  |
| 102 | 167.45338 | 102 | 187.50032 | 102 | 18.85628 | 102 | 9.42571  |
| 103 | 155.04816 | 103 | 189.68475 | 103 | 21.19091 | 103 | 9.59826  |
| 104 | 140.05099 | 104 | 184.6265  | 104 | 21.80596 | 104 | 9.31067  |

|     |           |     |           |     |           |     |          |
|-----|-----------|-----|-----------|-----|-----------|-----|----------|
| 105 | 132.58602 | 105 | 184.51953 | 105 | 21.55001  | 105 | 9.28259  |
| 106 | 101.81956 | 106 | 186.83608 | 106 | 24.86372  | 106 | 7.46395  |
| 107 | 91.36716  | 107 | 189.61822 | 107 | 30.91364  | 107 | 9.73836  |
| 108 | 109.84405 | 108 | 186.96991 | 108 | 34.87784  | 108 | 13.69145 |
| 109 | 83.85062  | 109 | 185.84789 | 109 | 38.66495  | 109 | 9.82805  |
| 110 | 76.33634  | 110 | 186.47145 | 110 | 39.86123  | 110 | 7.96205  |
| 111 | 91.50208  | 111 | 186.97325 | 111 | 40.86649  | 111 | 11.15197 |
| 112 | 118.42261 | 112 | 185.85521 | 112 | 45.56742  | 112 | 12.51882 |
| 113 | 99.98591  | 113 | 184.61878 | 113 | 50.46077  | 113 | 9.52334  |
| 114 | 84.73136  | 114 | 181.87899 | 114 | 52.63285  | 114 | 9.23656  |
| 115 | 85.60793  | 115 | 183.54027 | 115 | 54.74639  | 115 | 7.94071  |
| 116 | 79.69091  | 116 | 185.79058 | 116 | 64.03656  | 116 | 8.68351  |
| 117 | 85.28363  | 117 | 186.29163 | 117 | 67.75536  | 117 | 9.94656  |
| 118 | 83.61565  | 118 | 182.7314  | 118 | 69.7155   | 118 | 9.95019  |
| 119 | 82.83288  | 119 | 185.02294 | 119 | 73.17712  | 119 | 9.38632  |
| 120 | 76.7577   | 120 | 182.54803 | 120 | 78.6353   | 120 | 10.39773 |
| 121 | 57.73556  | 121 | 183.4199  | 121 | 81.64595  | 121 | 11.73766 |
| 122 | 61.51757  | 122 | 183.86362 | 122 | 83.71933  | 122 | 10.09607 |
| 123 | 73.57228  | 123 | 183.67011 | 123 | 86.59185  | 123 | 10.99504 |
| 124 | 90.21136  | 124 | 180.88813 | 124 | 89.01438  | 124 | 12.43077 |
| 125 | 100.74716 | 125 | 180.45895 | 125 | 92.58545  | 125 | 10.5072  |
| 126 | 101.81777 | 126 | 182.67301 | 126 | 96.99049  | 126 | 11.39781 |
| 127 | 95.98377  | 127 | 173.28529 | 127 | 99.3969   | 127 | 13.72381 |
| 128 | 76.22315  | 128 | 173.86516 | 128 | 100.63471 | 128 | 11.55222 |
| 129 | 68.9472   | 129 | 171.68731 | 129 | 104.17509 | 129 | 10.07591 |
| 130 | 70.29833  | 130 | 171.1135  | 130 | 109.20192 | 130 | 9.08469  |
| 131 | 67.18851  | 131 | 173.93166 | 131 | 111.31852 | 131 | 10.32174 |
| 132 | 71.05688  | 132 | 168.73312 | 132 | 110.92215 | 132 | 10.23701 |
| 133 | 76.72331  | 133 | 168.33837 | 133 | 113.60708 | 133 | 9.83775  |
| 134 | 85.88575  | 134 | 164.79055 | 134 | 115.05229 | 134 | 9.31733  |
| 135 | 98.00652  | 135 | 163.48538 | 135 | 118.19365 | 135 | 8.48827  |
| 136 | 108.73039 | 136 | 157.5903  | 136 | 120.54929 | 136 | 6.88685  |
| 137 | 112.20677 | 137 | 159.67455 | 137 | 117.16995 | 137 | 6.92765  |
| 138 | 114.68317 | 138 | 160.87594 | 138 | 116.91823 | 138 | 6.25439  |
| 139 | 108.42113 | 139 | 156.57014 | 139 | 118.95031 | 139 | 5.71902  |
| 140 | 98.98663  | 140 | 155.09786 | 140 | 121.12451 | 140 | 8.73801  |
| 141 | 91.86631  | 141 | 153.07531 | 141 | 119.34852 | 141 | 8.95911  |
| 142 | 80.01266  | 142 | 151.50153 | 142 | 117.44574 | 142 | 8.54303  |
| 143 | 71.64089  | 143 | 147.60394 | 143 | 117.30537 | 143 | 8.6281   |
| 144 | 72.72832  | 144 | 148.89786 | 144 | 118.592   | 144 | 8.55137  |
| 145 | 72.35876  | 145 | 149.7012  | 145 | 117.26355 | 145 | 6.45778  |
| 146 | 76.39956  | 146 | 148.07933 | 146 | 114.85034 | 146 | 4.84736  |
| 147 | 89.76191  | 147 | 144.17363 | 147 | 118.14847 | 147 | 6.46079  |
| 148 | 97.33552  | 148 | 135.37048 | 148 | 121.51573 | 148 | 8.95989  |
| 149 | 102.21155 | 149 | 132.5632  | 149 | 116.23627 | 149 | 8.20786  |
| 150 | 104.17088 | 150 | 132.81408 | 150 | 116.31746 | 150 | 3.51638  |
| 151 | 102.81521 | 151 | 143.87197 | 151 | 117.50034 | 151 | 3.77563  |
| 152 | 91.4491   | 152 | 134.23645 | 152 | 115.98232 | 152 | 7.02921  |
| 153 | 80.0165   | 153 | 124.39775 | 153 | 114.8861  | 153 | 7.40772  |
| 154 | 70.56322  | 154 | 131.29937 | 154 | 113.70423 | 154 | 6.24072  |
| 155 | 59.50222  | 155 | 131.75203 | 155 | 115.52685 | 155 | 4.12942  |
| 156 | 46.10518  | 156 | 128.94088 | 156 | 114.06404 | 156 | 8.29374  |
| 157 | 30.20315  | 157 | 122.42462 | 157 | 110.61605 | 157 | 10.17524 |
| 158 | 24.5373   | 158 | 117.6471  | 158 | 109.03865 | 158 | 9.1778   |

|     |          |     |           |     |           |     |          |
|-----|----------|-----|-----------|-----|-----------|-----|----------|
| 159 | 28.01648 | 159 | 118.91743 | 159 | 111.4427  | 159 | 6.64916  |
| 160 | 32.45472 | 160 | 119.37726 | 160 | 109.87627 | 160 | 4.84251  |
| 161 | 43.29074 | 161 | 120.3583  | 161 | 107.74751 | 161 | 10.59161 |
| 162 | 43.69371 | 162 | 118.15454 | 162 | 104.83686 | 162 | 14.32463 |
| 163 | 50.31532 | 163 | 112.23967 | 163 | 105.17548 | 163 | 13.06608 |
| 164 | 55.72478 | 164 | 106.6448  | 164 | 103.56235 | 164 | 10.28843 |
| 165 | 57.97816 | 165 | 106.20691 | 165 | 106.86171 | 165 | 9.04739  |
| 166 | 67.90784 | 166 | 102.98219 | 166 | 105.31969 | 166 | 11.78777 |
| 167 | 67.65033 | 167 | 99.67261  | 167 | 101.12108 | 167 | 18.45545 |
| 168 | 56.0039  | 168 | 106.32219 | 168 | 100.50923 | 168 | 18.59411 |
| 169 | 42.09995 | 169 | 109.5537  | 169 | 98.86516  | 169 | 15.62171 |
| 170 | 32.01722 | 170 | 103.87378 | 170 | 95.43898  | 170 | 17.53507 |
| 171 | 28.03271 | 171 | 99.7545   | 171 | 96.66616  | 171 | 24.8912  |
| 172 | 18.74267 | 172 | 99.09474  | 172 | 95.40265  | 172 | 27.50922 |
| 173 | 14.20289 | 173 | 105.08955 | 173 | 93.91748  | 173 | 25.97027 |
| 174 | 19.10065 | 174 | 100.23311 | 174 | 93.28349  | 174 | 27.56876 |
| 175 | 29.04109 | 175 | 98.87756  | 175 | 92.09371  | 175 | 28.4939  |
| 176 | 34.55566 | 176 | 100.14332 | 176 | 91.90152  | 176 | 31.33552 |
| 177 | 47.35222 | 177 | 94.72624  | 177 | 82.13204  | 177 | 36.8456  |
| 178 | 49.88141 | 178 | 92.71936  | 178 | 82.38561  | 178 | 40.58465 |
| 179 | 51.77073 | 179 | 90.16626  | 179 | 84.8903   | 179 | 43.60686 |
| 180 | 52.50747 | 180 | 89.38321  | 180 | 86.77206  | 180 | 45.01619 |
| 181 | 50.3991  | 181 | 83.71771  | 181 | 81.97625  | 181 | 45.7499  |
| 182 | 35.4476  | 182 | 81.24775  | 182 | 81.69719  | 182 | 40.37645 |
| 183 | 26.03849 | 183 | 84.48557  | 183 | 85.78186  | 183 | 45.50068 |
| 184 | 13.56297 | 184 | 86.61497  | 184 | 83.00819  | 184 | 51.1957  |
| 185 | 15.15374 | 185 | 88.72644  | 185 | 81.21739  | 185 | 51.71469 |
| 186 | 29.56102 | 186 | 87.15191  | 186 | 79.91328  | 186 | 55.36691 |
| 187 | 38.93489 | 187 | 85.27766  | 187 | 78.60085  | 187 | 56.55149 |
| 188 | 48.4084  | 188 | 83.34494  | 188 | 79.53191  | 188 | 55.42587 |
| 189 | 52.04618 | 189 | 81.39226  | 189 | 78.75688  | 189 | 55.14305 |
| 190 | 75.37476 | 190 | 81.38968  | 190 | 72.97822  | 190 | 54.39016 |
| 191 | 68.40806 | 191 | 83.03133  | 191 | 74.24904  | 191 | 55.08254 |
| 192 | 38.03166 | 192 | 84.30899  | 192 | 76.33492  | 192 | 54.84629 |
| 193 | 31.45883 | 193 | 83.16356  | 193 | 73.52604  | 193 | 56.0771  |
| 194 | 16.04526 | 194 | 82.80074  | 194 | 73.40643  | 194 | 55.80458 |
| 195 | 9.74466  | 195 | 80.10887  | 195 | 75.73749  | 195 | 54.66841 |
| 196 | 11.39077 | 196 | 78.76478  | 196 | 72.08285  | 196 | 50.5961  |
| 197 | 17.6721  | 197 | 77.24003  | 197 | 69.8291   | 197 | 47.19169 |
| 198 | 27.46424 | 198 | 74.75853  | 198 | 72.09922  | 198 | 49.69446 |
| 199 | 38.56242 | 199 | 72.48156  | 199 | 70.71334  | 199 | 50.34631 |
| 200 | 44.52119 | 200 | 70.81792  | 200 | 68.2425   | 200 | 48.58344 |
| --  | 42.51194 | 201 | 73.72848  | 201 | 66.28563  | 201 | 47.807   |
| --  | 39.37393 | 202 | 72.77069  | 202 | 65.8974   | 202 | 47.83019 |
| --  | 28.91471 | 203 | 68.59955  | 203 | 65.3254   | 203 | 48.15026 |
| --  | 22.83813 | 204 | 67.13038  | 204 | 63.90071  | 204 | 44.3201  |
| --  | 17.20987 | 205 | 64.41445  | 205 | 68.02311  | 205 | 40.17077 |
| --  | 14.09369 | 206 | 65.12772  | 206 | 68.52864  | 206 | 42.01916 |
| --  | 17.14476 | 207 | 64.43269  | 207 | 61.94928  | 207 | 41.65017 |
| --  | 23.36627 | 208 | 63.83501  | 208 | 63.4829   | 208 | 41.33888 |
| --  | 35.20155 | 209 | 61.85928  | 209 | 62.41808  | 209 | 41.45213 |
| --  | 35.8561  | 210 | 59.07613  | 210 | 59.60293  | 210 | 41.37323 |
| --  | 38.77085 | 211 | 57.6557   | 211 | 58.17903  | 211 | 42.0221  |
| --  | 42.79393 | 212 | 56.14227  | 212 | 58.24925  | 212 | 38.38797 |

|    |          |     |          |     |          |     |          |
|----|----------|-----|----------|-----|----------|-----|----------|
| -- | 40.66826 | 213 | 52.85209 | 213 | 57.84703 | 213 | 36.08741 |
| -- | 31.33775 | 214 | 48.04038 | 214 | 53.2938  | 214 | 38.23071 |
| -- | 15.31165 | 215 | 48.0425  | 215 | 55.79839 | 215 | 43.6739  |
| -- | 9.42649  | 216 | 44.99897 | 216 | 57.69788 | 216 | 40.10771 |
| -- | 5.53414  | 217 | 42.50016 | 217 | 54.69195 | 217 | 40.88262 |
| -- | 6.00288  | 218 | 40.03283 | 218 | 54.12469 | 218 | 46.11756 |
| -- | 2.52215  | 219 | 38.1465  | 219 | 54.52077 | 219 | 49.968   |
| -- | 11.73788 | 220 | 38.80861 | 220 | 54.52301 | 220 | 53.62854 |
| -- | 38.9905  | 221 | 36.53866 | 221 | 54.71187 | 221 | 52.28973 |
| -- | 42.31292 | 222 | 33.67791 | 222 | 52.7754  | 222 | 52.36876 |
| -- | 49.12945 | 223 | 29.04862 | 223 | 51.93158 | 223 | 54.62831 |
| -- | 39.32659 | 224 | 28.67056 | 224 | 51.84885 | 224 | 58.04493 |
| -- | 31.82405 | 225 | 28.82112 | 225 | 52.53834 | 225 | 59.18099 |
| -- | 29.1913  | 226 | 23.96123 | 226 | 46.20784 | 226 | 61.98158 |
| -- | 19.82441 | 227 | 21.19938 | 227 | 47.12877 | 227 | 62.29997 |
| -- | 11.24211 | 228 | 20.6211  | 228 | 50.29274 | 228 | 64.20552 |
| -- | 5.20111  | 229 | 17.8846  | 229 | 49.52497 | 229 | 68.14782 |
| -- | 9.06715  | 230 | 17.14578 | 230 | 50.11102 | 230 | 66.52804 |
| -- | 17.63435 | 231 | 16.81737 | 231 | 50.10404 | 231 | 67.18961 |
| -- | 23.39873 | 232 | 4.05689  | 232 | 49.77905 | 232 | 69.78865 |
| -- | 29.74829 | 233 | 3.30244  | 233 | 49.21985 | 233 | 68.42824 |
| -- | 40.42    | 234 | 10.67048 | 234 | 47.76191 | 234 | 65.27338 |
| -- | 49.07579 | 235 | 8.8947   | 235 | 46.55273 | 235 | 63.38438 |
| -- | 50.24683 | 236 | 9.99269  | 236 | 46.96875 | 236 | 65.40306 |
| -- | 46.10815 | 237 | 10.06925 | 237 | 43.8578  | 237 | 69.44351 |
| -- | 41.05354 | 238 | 9.55808  | 238 | 43.29351 | 238 | 67.14522 |
| -- | 34.56891 | 239 | 4.31808  | 239 | 49.21205 | 239 | 69.15143 |
| -- | 29.46434 | 240 | 2.36611  | 240 | 52.49809 | 240 | 68.09288 |
| -- | 17.56455 | 241 | 1.24034  | 241 | 52.82778 | 241 | 69.20601 |
| -- | 8.42083  | 242 | 6.75459  | 242 | 59.4939  | 242 | 70.77302 |
| -- | 16.46305 | 243 | 4.11328  | 243 | 59.16974 | 243 | 69.84855 |
| -- | 17.15786 | 244 | 10.79534 | 244 | 60.09796 | 244 | 67.03456 |
| -- | 22.53823 | 245 | 8.93468  | 245 | 50.01727 | 245 | 65.05148 |
| -- | 31.20043 | 246 | 2.21232  | 246 | 45.92023 | 246 | 65.73383 |
| -- | 33.18273 | 247 | 0.49784  | 247 | 44.53548 | 247 | 66.91557 |
| -- | 45.24099 | 248 | 0.73402  | 248 | 46.06438 | 248 | 67.1049  |
| -- | 54.37974 | 249 | 5.88942  | 249 | 44.06887 | 249 | 65.54378 |
| -- | 84.87511 | 250 | 7.20939  | 250 | 43.26206 | 250 | 65.0843  |
| -- | 88.40289 | 251 | 3.30954  | 251 | 42.18336 | 251 | 63.79408 |
| -- | 59.28697 | 252 | 5.85205  | 252 | 45.1025  | 252 | 63.60962 |
| -- | 37.64246 | 253 | 7.22814  | 253 | 47.52731 | 253 | 62.81879 |
| -- | 14.42059 | 254 | 6.06188  | 254 | 46.35564 | 254 | 62.60545 |
| -- | 12.13085 | 255 | 6.06054  | 255 | 45.50394 | 255 | 55.98276 |
| -- | 19.81329 | 256 | 4.12643  | 256 | 42.73978 | 256 | 60.64473 |
| -- | 20.68611 | 257 | 4.35248  | 257 | 43.47649 | 257 | 63.57673 |
| -- | 11.97426 | 258 | 6.28982  | 258 | 42.8639  | 258 | 62.86106 |
| -- | 4.13439  | 259 | 5.26238  | 259 | 43.46415 | 259 | 62.59622 |
| -- | 4.55021  | 260 | 4.69608  | 260 | 44.09644 | 260 | 61.02839 |
| -- | 11.96709 | 261 | 4.00874  | 261 | 43.62871 | 261 | 62.79901 |
| -- | 24.62801 | 262 | 4.53895  | 262 | 43.47592 | 262 | 63.26766 |
| -- | 39.68293 | 263 | 2.9139   | 263 | 41.51068 | 263 | 64.4285  |
| -- | 44.38224 | 264 | 5.38272  | 264 | 41.49446 | 264 | 62.59276 |
| -- | 55.62573 | 265 | 6.6738   | 265 | 42.11869 | 265 | 58.55565 |
| -- | 62.27173 | 266 | 5.59429  | 266 | 42.36824 | 266 | 57.64303 |

|    |          |     |          |     |          |     |          |
|----|----------|-----|----------|-----|----------|-----|----------|
| -- | 61.1362  | 267 | 5.81123  | 267 | 39.86877 | 267 | 58.44154 |
| -- | 54.75436 | 268 | 8.47558  | 268 | 28.26574 | 268 | 58.97224 |
| -- | 37.77342 | 269 | 9.29951  | 269 | 28.30024 | 269 | 56.69676 |
| -- | 26.99007 | 270 | 10.56215 | 270 | 40.32171 | 270 | 54.34529 |
| -- | 20.26634 | 271 | 7.46296  | 271 | 43.00269 | 271 | 55.8879  |
| -- | 16.61232 | 272 | 9.57908  | 272 | 44.63675 | 272 | 56.46279 |
| -- | 8.7923   | 273 | 11.10998 | 273 | 40.58308 | 273 | 58.6178  |
| -- | -0.02816 | 274 | 6.04118  | 274 | 39.98763 | 274 | 59.22865 |
| -- | 6.53007  | 275 | 6.53172  | 275 | 39.7518  | 275 | 57.31729 |
| -- | 13.04923 | 276 | 5.37539  | 276 | 37.17905 | 276 | 55.69376 |
| -- | 24.09167 | 277 | 3.86847  | 277 | 38.91844 | 277 | 56.16065 |
| -- | 41.65989 | 278 | 6.31509  | 278 | 37.70336 | 278 | 54.65036 |
| -- | 44.5837  | 279 | 3.60612  | 279 | 38.1131  | 279 | 54.86562 |
| -- | 51.83926 | 280 | 3.01566  | 280 | 37.60732 | 280 | 55.73617 |
| -- | 54.58625 | 281 | -0.09453 | 281 | 37.87834 | 281 | 53.63901 |
| -- | 50.60972 | 282 | 3.71182  | 282 | 36.9463  | 282 | 54.21345 |
| -- | 45.63476 | 283 | 5.47076  | 283 | 37.61948 | 283 | 54.67091 |
| -- | 36.27569 | 284 | 7.51718  | 284 | 37.00141 | 284 | 52.50979 |
| -- | 35.17956 | 285 | 3.11304  | 285 | 37.99719 | 285 | 51.74949 |
| -- | 23.21805 | 286 | 6.43282  | 286 | 40.67276 | 286 | 53.74338 |
| -- | 14.50795 | 287 | 8.09446  | 287 | 38.98154 | 287 | 50.78745 |
| -- | 10.17459 | 288 | 7.11473  | 288 | 32.20517 | 288 | 52.04097 |
| -- | 5.29517  | 289 | 8.74329  | 289 | 31.95108 | 289 | 51.56489 |
| -- | 16.76211 | 290 | 10.17006 | 290 | 37.42213 | 290 | 47.47481 |
| -- | 23.13403 | 291 | 8.13927  | 291 | 35.42209 | 291 | 50.80876 |
| -- | 23.74013 | 292 | 5.41409  | 292 | 35.17925 | 292 | 54.20624 |
| -- | 36.8542  | 293 | 7.37606  | 293 | 33.57087 | 293 | 52.60147 |
| -- | 49.9344  | 294 | 12.92393 | 294 | 31.68239 | 294 | 50.67191 |
| -- | 51.85165 | 295 | 12.87359 | 295 | 31.74302 | 295 | 50.96653 |
| -- | 43.74415 | 296 | 6.85175  | 296 | 32.52691 | 296 | 50.8797  |
| -- | 41.25933 | 297 | 5.50065  | 297 | 33.72898 | 297 | 49.07144 |
| -- | 42.99427 | 298 | 7.0832   | 298 | 32.5144  | 298 | 47.74527 |
| -- | 32.00897 | 299 | 7.01499  | 299 | 31.29685 | 299 | 47.83519 |
| -- | 13.4029  | 300 | 10.22532 | 300 | 32.3363  | 300 | 46.90144 |
| -- | 11.19425 | 301 | 9.1668   | 301 | 38.39241 | 301 | 48.68886 |
| -- | 15.30034 | 302 | 5.29891  | 302 | 33.00468 | 302 | 49.54136 |
| -- | 18.21911 | 303 | 6.99191  | 303 | 29.58871 | 303 | 44.56394 |
| -- | 21.04707 | 304 | 7.30937  | 304 | 29.99282 | 304 | 41.79904 |
| -- | 27.39312 | 305 | 5.95364  | 305 | 31.06589 | 305 | 45.10124 |
| -- | 30.94983 | 306 | 6.57353  | 306 | 30.24964 | 306 | 45.81183 |
| -- | 45.11441 | 307 | 5.25581  | 307 | 30.01769 | 307 | 44.83388 |
| -- | 51.19097 | 308 | 8.75282  | 308 | 29.31292 | 308 | 43.07851 |
| -- | 48.60447 | 309 | 11.22927 | 309 | 27.98836 | 309 | 48.43547 |
| -- | 46.69089 | 310 | 12.4726  | 310 | 28.1865  | 310 | 47.46282 |
| -- | 31.58033 | 311 | 6.49774  | 311 | 25.30554 | 311 | 41.93887 |
| -- | 25.52061 | 312 | 14.41366 | 312 | 24.27134 | 312 | 43.104   |
| -- | 22.89493 | 313 | 14.5569  | 313 | 24.5683  | 313 | 44.96136 |
| -- | 7.44225  | 314 | 4.89336  | 314 | 26.88687 | 314 | 42.6734  |
| -- | 14.55251 | 315 | 6.07338  | 315 | 27.64794 | 315 | 42.68256 |
| -- | 31.92762 | 316 | 7.44291  | 316 | 26.08571 | 316 | 41.89805 |
| -- | 40.86308 | 317 | 6.66907  | 317 | 24.80717 | 317 | 44.39271 |
| -- | 43.98789 | 318 | 8.80052  | 318 | 20.27825 | 318 | 45.94186 |
| -- | 46.4852  | 319 | 5.59049  | 319 | 20.60629 | 319 | 43.39091 |
| -- | 52.69732 | 320 | 7.42997  | 320 | 22.37342 | 320 | 42.40634 |

|    |          |     |          |     |          |     |          |
|----|----------|-----|----------|-----|----------|-----|----------|
| -- | 53.12538 | 321 | 10.37145 | 321 | 23.28919 | 321 | 49.14061 |
| -- | 37.25623 | 322 | 8.27844  | 322 | 26.54959 | 322 | 46.79129 |
| -- | 27.32858 | 323 | 7.00993  | 323 | 25.74533 | 323 | 41.27532 |
| -- | 26.0418  | 324 | 10.05184 | 324 | 28.24492 | 324 | 40.17113 |
| -- | 20.25116 | 325 | 2.74316  | 325 | 26.69672 | 325 | 37.53063 |
| -- | 18.00643 | 326 | 4.99297  | 326 | 24.70176 | 326 | 38.31376 |
| -- | 11.92983 | 327 | 8.27846  | 327 | 24.90976 | 327 | 46.82176 |
| -- | 22.15052 | 328 | 8.78592  | 328 | 22.90769 | 328 | 43.0828  |
| -- | 32.85484 | 329 | 8.54038  | 329 | 23.17324 | 329 | 42.19795 |
| -- | 47.73103 | 330 | 11.16877 | 330 | 25.26608 | 330 | 42.00722 |
| -- | 49.63576 | 331 | 9.1464   | 331 | 24.87512 | 331 | 39.15832 |
| -- | 50.76715 | 332 | 0.03988  | 332 | 23.48213 | 332 | 39.1941  |
| -- | 61.61636 | 333 | 2.5703   | 333 | 23.31446 | 333 | 37.03691 |
| -- | 58.23918 | 334 | 9.02517  | 334 | 22.2297  | 334 | 37.48406 |
| -- | 53.86175 | 335 | 10.28184 | 335 | 23.62451 | 335 | 35.1159  |
| -- | 49.94649 | 336 | 9.3782   | 336 | 22.66709 | 336 | 41.27277 |
| -- | 26.46059 | 337 | 7.90404  | 337 | 19.63789 | 337 | 39.85155 |
| -- | 15.48372 | 338 | 7.61584  | 338 | 19.48519 | 338 | 31.78132 |
| -- | 23.19862 | 339 | 9.19502  | 339 | 21.0954  | 339 | 31.83256 |
| -- | 16.93375 | 340 | 8.63822  | 340 | 19.75481 | 340 | 33.79184 |
| -- | 13.42978 | 341 | 6.72017  | 341 | 19.43683 | 341 | 34.42111 |
| -- | 19.71758 | 342 | 7.47911  | 342 | 20.0011  | 342 | 34.22135 |
| -- | 28.02407 | 343 | 6.645    | 343 | 18.9027  | 343 | 33.62872 |
| -- | 40.04955 | 344 | 7.07268  | 344 | 19.80793 | 344 | 35.63186 |
| -- | 49.89518 | 345 | 8.01287  | 345 | 22.60813 | 345 | 37.3401  |
| -- | 47.82365 | 346 | 10.46084 | 346 | 18.47592 | 346 | 31.34743 |
| -- | 56.79595 | 347 | 5.71501  | 347 | 18.05992 | 347 | 25.8957  |
| -- | 61.79135 | 348 | 5.70901  | 348 | 16.60512 | 348 | 34.04093 |
| -- | 62.30717 | 349 | 5.99475  | 349 | 17.43454 | 349 | 34.85312 |
| -- | 58.415   | 350 | 6.13528  | 350 | 16.27162 | 350 | 34.56929 |
| -- | 47.91827 | 351 | 7.72118  | 351 | 15.65695 | 351 | 37.08585 |
| -- | 33.1963  | 352 | 9.78119  | 352 | 18.83814 | 352 | 38.28666 |
| -- | 16.59304 | 353 | 10.85145 | 353 | 20.68723 | 353 | 37.57248 |
| -- | 11.276   | 354 | 8.92997  | 354 | 21.59392 | 354 | 36.08846 |
| -- | 11.88768 | 355 | 4.4889   | 355 | 19.48484 | 355 | 36.0925  |
| -- | 19.27667 | 356 | 4.57468  | 356 | 18.96816 | 356 | 35.84527 |
| -- | 19.86823 | 357 | 3.94862  | 357 | 19.1185  | 357 | 38.17901 |
| -- | 28.24967 | 358 | 2.99856  | 358 | 16.83644 | 358 | 37.72155 |
| -- | 28.43671 | 359 | 2.99618  | 359 | 21.25086 | 359 | 36.92691 |
| -- | 33.38121 | 360 | 2.74785  | 360 | 23.10226 | 360 | 41.06721 |
| -- | 52.85322 | 361 | 3.9997   | 361 | 19.93175 | 361 | 40.85632 |
| -- | 55.25854 | 362 | 6.18266  | 362 | 19.4397  | 362 | 42.65636 |
| -- | 63.0014  | 363 | 2.47669  | 363 | 19.05988 | 363 | 43.84453 |
| -- | 70.76207 | 364 | 0.79982  | 364 | 19.41512 | 364 | 42.25321 |
| -- | 66.60253 | 365 | 2.19017  | 365 | 16.30167 | 365 | 41.69155 |
| -- | 42.42318 | 366 | 3.41798  | 366 | 18.04735 | 366 | 38.26204 |
| -- | 17.94844 | 367 | 1.55219  | 367 | 17.34837 | 367 | 39.80352 |
| -- | 0.29143  | 368 | 4.24985  | 368 | 15.59952 | 368 | 43.30818 |
| -- | 13.13479 | 369 | 2.01232  | 369 | 14.66539 | 369 | 42.40393 |
| -- | 21.10096 | 370 | 0.86065  | 370 | 15.39989 | 370 | 40.34799 |
| -- | 22.9187  | 371 | 8.27705  | 371 | 14.87895 | 371 | 39.64774 |
| -- | 35.27272 | 372 | 3.21408  | 372 | 15.61898 | 372 | 40.45151 |
| -- | 38.74959 | 373 | 3.03498  | 373 | 14.72259 | 373 | 42.032   |
| -- | 41.52549 | 374 | 3.9636   | 374 | 15.28443 | 374 | 39.37231 |

|    |          |     |          |     |          |     |          |
|----|----------|-----|----------|-----|----------|-----|----------|
| -- | 56.52742 | 375 | 3.88275  | 375 | 15.20347 | 375 | 37.21888 |
| -- | 80.85832 | 376 | 5.11448  | 376 | 11.67001 | 376 | 37.23705 |
| -- | 72.74945 | 377 | 7.1403   | 377 | 11.18094 | 377 | 35.18958 |
| -- | 57.46307 | 378 | 6.47102  | 378 | 11.70666 | 378 | 35.10315 |
| -- | 48.38806 | 379 | 4.73858  | 379 | 10.38101 | 379 | 36.15796 |
| -- | 35.48536 | 380 | 4.54563  | 380 | 10.90218 | 380 | 38.89385 |
| -- | 33.10729 | 381 | 3.06779  | 381 | 13.3988  | 381 | 41.63812 |
| -- | 27.6774  | 382 | 3.31949  | 382 | 9.34897  | 382 | 40.81401 |
| -- | 22.39747 | 383 | 3.41366  | 383 | 9.10187  | 383 | 39.76439 |
| -- | 21.81829 | 384 | 4.46183  | 384 | 9.04356  | 384 | 40.4359  |
| -- | 31.6442  | 385 | 5.28967  | 385 | 5.93632  | 385 | 40.31988 |
| -- | 34.48337 | 386 | 6.93695  | 386 | 14.82641 | 386 | 38.63559 |
| -- | 43.59542 | 387 | 7.48341  | 387 | 16.03887 | 387 | 37.12091 |
| -- | 52.44258 | 388 | 5.89081  | 388 | 6.16768  | 388 | 37.26974 |
| -- | 48.44634 | 389 | 4.82659  | 389 | 5.76594  | 389 | 23.15292 |
| -- | 42.97887 | 390 | 5.34895  | 390 | 4.52599  | 390 | 31.88843 |
| -- | 28.38858 | 391 | 4.01864  | 391 | 6.04066  | 391 | 40.18116 |
| -- | 20.61491 | 392 | 0.63446  | 392 | 7.33579  | 392 | 38.51812 |
| -- | 20.57252 | 393 | 3.00351  | 393 | 6.66096  | 393 | 39.73447 |
| -- | 10.80756 | 394 | 4.66218  | 394 | 4.90996  | 394 | 38.86142 |
| -- | 6.51039  | 395 | 3.80528  | 395 | 5.03135  | 395 | 35.86659 |
| -- | 11.42068 | 396 | 2.64552  | 396 | 4.42642  | 396 | 37.23581 |
| -- | 17.98639 | 397 | 1.91003  | 397 | 4.09932  | 397 | 34.52068 |
| -- | 24.3568  | 398 | 3.17247  | 398 | 4.42545  | 398 | 33.35841 |
| -- | 40.22086 | 399 | 2.33737  | 399 | 6.50044  | 399 | 32.66863 |
| -- | 46.3099  | 400 | 3.37424  | 400 | 6.03654  | 400 | 34.64082 |
| -- | 47.69258 | 401 | 3.68123  | 401 | 3.87813  | 401 | 36.80407 |
| -- | 47.12534 | 402 | 3.4342   | 402 | 7.07529  | 402 | 36.84884 |
| -- | 47.09226 | 403 | 3.51666  | 403 | 8.05202  | 403 | 36.25941 |
| -- | 41.97151 | 404 | 2.65187  | 404 | 3.9156   | 404 | 34.30471 |
| -- | 33.52823 | 405 | 3.4506   | 405 | 3.47324  | 405 | 39.1113  |
| -- | 22.69311 | 406 | 4.3187   | 406 | 3.60513  | 406 | 39.60962 |
| -- | 16.10692 | 407 | 11.15849 | 407 | 3.40448  | 407 | 37.86354 |
| -- | 16.06074 | 408 | 16.2439  | 408 | 2.81203  | 408 | 37.74342 |
| -- | 17.5109  | 409 | 10.90954 | 409 | 2.5759   | 409 | 36.66424 |
| -- | 22.12962 | 410 | 2.30826  | 410 | 5.68872  | 410 | 36.59864 |
|    |          | 411 | 0.56917  | 411 | 8.22763  | 411 | 35.72077 |
|    |          | 412 | 4.00444  | 412 | 11.26772 | 412 | 37.14269 |
|    |          | 413 | 3.38411  | 413 | 11.46326 | 413 | 39.97317 |
|    |          | 414 | 3.18265  | 414 | 10.31647 | 414 | 39.49714 |
|    |          | 415 | 6.18055  | 415 | 11.20552 | 415 | 34.50873 |
|    |          |     |          | 416 | 7.14377  | 416 | 34.54007 |
|    |          |     |          | 417 | 4.46282  | 417 | 37.81352 |
|    |          |     |          | 418 | 5.02146  | 418 | 38.14053 |
|    |          |     |          | 419 | 2.97804  | 419 | 36.79823 |
|    |          |     |          | 420 | 2.47763  | 420 | 36.2982  |
|    |          |     |          | 421 | 6.26227  | 421 | 33.78775 |
|    |          |     |          | 422 | 7.69886  | 422 | 28.99063 |
|    |          |     |          | 423 | 10.73969 | 423 | 32.95078 |
|    |          |     |          | 424 | 8.96086  | 424 | 39.53597 |
|    |          |     |          | 425 | 7.5929   | 425 | 39.41827 |
|    |          |     |          | 426 | 6.7806   | 426 | 35.11727 |
|    |          |     |          | 427 | 3.37623  | 427 | 35.03596 |
|    |          |     |          | 428 | 4.68464  | 428 | 36.91675 |



|     |          |     |          |
|-----|----------|-----|----------|
| 429 | -0.4644  | 429 | 34.81026 |
| 430 | 1.8671   | 430 | 34.52253 |
| 431 | 8.36121  | 431 | 34.03461 |
| 432 | 11.43433 | 432 | 28.25336 |
| 433 | 8.02396  | 433 | 29.75021 |
| 434 | 7.57091  | 434 | 32.29704 |
| 435 | 8.43424  | 435 | 31.41565 |
| 436 | 7.85488  | 436 | 29.4093  |
| 437 | 9.0491   | 437 | 27.16757 |
| 438 | 9.81537  | 438 | 25.57212 |
| 439 | 8.80082  | 439 | 26.78883 |
| 440 | 6.3225   | 440 | 29.40173 |
| 441 | 8.88899  | 441 | 29.80032 |
| 442 | 10.15649 | 442 | 27.6358  |
| 443 | 7.68896  | 443 | 25.00438 |
| 444 | 8.13173  | 444 | 28.42923 |
| 445 | 8.0467   | 445 | 30.16371 |
| 446 | 4.60546  | 446 | 32.77215 |
| 447 | 4.81004  | 447 | 36.96231 |
| 448 | 5.39824  | 448 | 29.47247 |
| 449 | 10.66383 | 449 | 29.06053 |
| 450 | 10.25426 | 450 | 26.08428 |
| 451 | 8.14952  | 451 | 27.43461 |
| 452 | 8.72884  | 452 | 29.85653 |
| 453 | 7.38421  | 453 | 28.65617 |
| 454 | 10.07265 | 454 | 26.15939 |
| 455 | 6.8507   | 455 | 25.14257 |
| 456 | 3.78667  | 456 | 28.69196 |
| 457 | 5.05931  | 457 | 30.661   |
| 458 | 6.78766  | 458 | 26.78955 |
| 459 | 17.24469 | 459 | 24.59909 |
| 460 | 19.3652  | 460 | 26.28317 |
| 461 | 11.71063 | 461 | 25.98912 |
| 462 | 11.29477 | 462 | 18.90701 |
| 463 | 15.70235 | 463 | 23.62053 |
| 464 | 13.04197 | 464 | 29.413   |
| 465 | 8.84256  | 465 | 31.95963 |
| 466 | 10.95997 | 466 | 28.21383 |
| 467 | 10.48452 | 467 | 26.72549 |
| 468 | 12.2964  | 468 | 30.37959 |
| 469 | 11.07455 | 469 | 26.27196 |
| 470 | 9.48817  | 470 | 24.98318 |
| 471 | 9.9384   | 471 | 27.41789 |
| 472 | 9.17311  | 472 | 28.42944 |
| 473 | 10.11844 | 473 | 28.27051 |
| 474 | 10.26189 | 474 | 29.71828 |
| 475 | 11.36347 | 475 | 30.32132 |
| 476 | 12.952   | 476 | 26.82328 |
| 477 | 13.28252 | 477 | 25.32952 |
| 478 | 11.36867 | 478 | 25.78332 |
| 479 | 10.04182 | 479 | 27.69586 |
| 480 | 11.20452 | 480 | 26.94703 |
| 481 | 13.28044 | 481 | 25.02524 |
| 482 | 12.49809 | 482 | 24.68816 |

|     |          |     |          |
|-----|----------|-----|----------|
| 483 | 12.78477 | 483 | 25.96127 |
| 484 | 9.60802  | 484 | 25.50432 |
| 485 | 8.09382  | 485 | 26.15529 |
| 486 | -0.00346 | 486 | 28.62285 |
| 487 | 4.69888  | 487 | 21.66643 |
| 488 | 11.8799  | 488 | 18.02143 |
| 489 | 7.92956  | 489 | 21.97281 |
| 490 | 6.84097  | 490 | 18.68305 |
| 491 | 6.17165  | 491 | 18.29257 |
| 492 | 6.23618  | 492 | 18.81302 |
| 493 | 9.40628  | 493 | 19.11321 |
| 494 | 5.63404  | 494 | 20.32851 |
| 495 | 2.5856   | 495 | 17.46376 |
| 496 | 5.40466  | 496 | 16.82611 |
| 497 | 4.70504  | 497 | 18.76813 |
| 498 | 5.30873  | 498 | 18.63593 |
| 499 | 7.49487  | 499 | 15.93324 |
| 500 | 8.23549  | 500 | 15.83905 |
| 501 | 8.20582  | 501 | 15.80144 |
| 502 | 10.71554 | 502 | 15.6653  |
| 503 | 10.80695 | 503 | 17.95285 |
| 504 | 7.2246   | 504 | 18.11365 |
| 505 | 5.12931  | 505 | 18.0987  |
| 506 | 14.66348 | 506 | 19.31196 |
| 507 | 14.65817 | 507 | 15.5937  |
| 508 | 10.82184 | 508 | 13.56466 |
| 509 | 10.17258 | 509 | 13.93886 |
| 510 | 6.49182  | 510 | 17.00592 |
| 511 | 4.11968  | 511 | 17.08774 |
| 512 | 1.70949  | 512 | 13.60307 |
| 513 | 6.79153  | 513 | 15.15489 |
| 514 | 3.66589  | 514 | 10.82397 |
| 515 | 2.07811  | 515 | 14.40885 |
| 516 | 2.48991  | 516 | 21.82825 |
| 517 | 4.92215  | 517 | 13.43654 |
| 518 | 4.98821  | 518 | 9.63472  |
| 519 | 5.01642  | 519 | 12.14706 |
| 520 | 4.88805  | 520 | 17.7502  |
| 521 | 3.62986  | 521 | 15.74509 |
| 522 | 5.30619  | 522 | 15.40357 |
| 523 | 5.59375  | 523 | 15.01804 |
| 524 | 5.45677  | 524 | 8.14712  |
| 525 | 7.40989  | 525 | 13.30527 |
| 526 | 8.58698  | 526 | 21.61763 |
| 527 | 7.72681  | 527 | 16.45971 |
| 528 | 20.06382 | 528 | 17.88154 |
| 529 | 18.87789 | 529 | 10.72268 |
| 530 | 6.40529  | 530 | 9.98624  |
| 531 | 9.66365  | 531 | 18.13772 |
| 532 | 9.35178  | 532 | 19.99149 |
| 533 | 8.66252  | 533 | 19.88346 |
| 534 | 7.70873  | 534 | 16.8249  |
| 535 | 6.07519  | 535 | 18.9615  |
| 536 | 7.5517   | 536 | 19.91194 |

|     |          |     |          |
|-----|----------|-----|----------|
| 537 | 0.59836  | 537 | 15.28899 |
| 538 | 0.45163  | 538 | 14.851   |
| 539 | 4.49196  | 539 | 15.51373 |
| 540 | 5.66367  | 540 | 15.4616  |
| 541 | 7.16475  | 541 | 14.81997 |
| 542 | 6.85698  | 542 | 16.06017 |
| 543 | 4.35229  | 543 | 15.46118 |
| 544 | 5.56107  | 544 | 12.56449 |
| 545 | 5.40417  | 545 | 12.13493 |
| 546 | 7.31176  | 546 | 14.80513 |
| 547 | 7.47483  | 547 | 15.87155 |
| 548 | 5.34129  | 548 | 14.20377 |
| 549 | 4.88797  | 549 | 12.32863 |
| 550 | 6.62384  | 550 | 13.41566 |
| 551 | 9.43424  | 551 | 15.77697 |
| 552 | 9.13129  | 552 | 16.9735  |
| 553 | 8.19439  | 553 | 14.86422 |
| 554 | 8.38039  | 554 | 21.83514 |
| 555 | 6.46633  | 555 | 15.53711 |
| 556 | 7.42398  | 556 | 13.83662 |
| 557 | 6.01581  | 557 | 13.39378 |
| 558 | 5.52731  | 558 | 13.83207 |
| 559 | 13.20119 | 559 | 12.71059 |
| 560 | 11.69043 | 560 | 13.51366 |
| 561 | 3.10592  | 561 | 9.99662  |
| 562 | 2.92389  | 562 | 11.79745 |
| 563 | 5.35155  | 563 | 13.63602 |
| 564 | 7.67985  | 564 | 12.62516 |
| 565 | 10.56885 | 565 | 14.11214 |
| 566 | 7.56187  | 566 | 15.95656 |
| 567 | 6.84703  | 567 | 14.90911 |
| 568 | 9.25386  | 568 | 15.54191 |
| 569 | 8.30119  | 569 | 17.72341 |
| 570 | 7.61321  | 570 | 16.62717 |
| 571 | 6.7337   | 571 | 16.14043 |
| 572 | 6.56003  | 572 | 14.041   |
| 573 | 9.10467  | 573 | 9.46176  |
| 574 | 9.91455  | 574 | 9.80376  |
| 575 | 12.17081 | 575 | 11.70546 |
| 576 | 10.14057 | 576 | 12.65703 |
| 577 | 10.13162 | 577 | 13.40567 |
| 578 | 10.51176 | 578 | 12.95185 |
| 579 | 16.80935 | 579 | 14.06396 |
| 580 | 22.5793  | 580 | 14.50643 |
| 581 | 12.63211 | 581 | 15.93    |
| 582 | 15.63418 | 582 | 13.93359 |
| 583 | 15.11718 | 583 | 9.98434  |
| 584 | 10.78872 | 584 | 8.65134  |
| 585 | 10.54749 | 585 | 9.18151  |
| 586 | 9.7105   | 586 | 8.60763  |
| 587 | 8.63182  | 587 | 7.70092  |
| 588 | 8.43768  | 588 | 11.32289 |
| 589 | 2.4867   | 589 | 8.52821  |
| 590 | 0.79857  | 590 | 10.35168 |

|     |          |     |          |
|-----|----------|-----|----------|
| 591 | 11.93071 | 591 | 10.90801 |
| 592 | 17.50482 | 592 | 6.05611  |
| 593 | 13.84253 | 593 | 5.93925  |
| 594 | 12.50018 | 594 | 7.96527  |
| 595 | 10.8753  | 595 | 11.57666 |
| 596 | 10.0094  | 596 | 12.34613 |
| 597 | 11.6845  | 597 | 12.60661 |
| 598 | 9.93363  | 598 | 10.51004 |
| 599 | 10.92815 | 599 | 10.50579 |
| 600 | 11.11061 | 600 | 9.71125  |
| 601 | 13.10647 | 601 | 6.15589  |
| 602 | 12.83906 | 602 | 9.28062  |
| 603 | 10.69125 | 603 | 9.15375  |
| 604 | 5.76374  | 604 | 11.62572 |
| 605 | 13.60745 | 605 | 10.23635 |
| 606 | 13.71376 | 606 | 6.96401  |
| 607 | 10.22664 | 607 | 5.15344  |
| 608 | 7.85359  | 608 | 3.19874  |
| 609 | 7.90536  | 609 | 4.91318  |
| 610 | 10.52735 | 610 | 6.15356  |
| 611 | 11.0697  | 611 | 11.04569 |
| 612 | 10.61524 | 612 | 10.35599 |
| 613 | 7.85922  | 613 | 2.25464  |
| 614 | 9.50703  | 614 | 3.02255  |
| 615 | 7.75953  | 615 | 13.35118 |
| 616 | 7.83853  | 616 | 8.24058  |
| 617 | 8.40552  | 617 | 7.09013  |
| 618 | 9.43116  | 618 | 12.89773 |
| 619 | 11.11779 | 619 | 12.51257 |
| 620 | 11.02757 | 620 | 16.60856 |
| 621 | 8.15817  | 621 | 15.6341  |
| 622 | 7.28216  | 622 | 11.38706 |
| 623 | 10.08311 | 623 | 11.72461 |
| 624 | 8.98523  | 624 | 11.83573 |
| 625 | 8.90524  | 625 | 11.65296 |
| 626 | 9.58415  | 626 | 10.93753 |
| 627 | 10.62191 | 627 | 10.5848  |
| 628 | 9.96389  | 628 | 13.21758 |
| 629 | 9.42444  | 629 | 12.58629 |
| 630 | 10.90276 | 630 | 12.26566 |
| 631 | 15.81175 | 631 | 10.94651 |
| 632 | 16.41077 | 632 | 11.15923 |
| 633 | 13.84011 | 633 | 13.34102 |
| 634 | 9.05828  | 634 | 12.70023 |
| 635 | 8.86228  | 635 | 14.63848 |
| 636 | 10.85605 | 636 | 13.92183 |
| 637 | 10.44006 | 637 | 11.19209 |
| 638 | 12.70879 | 638 | 14.39803 |
|     |          | 639 | 14.045   |
|     |          | 640 | 10.50464 |
|     |          | 641 | 10.4441  |
|     |          | 642 | 11.65517 |
|     |          | 643 | 13.87357 |
|     |          | 644 | 12.78613 |

|     |          |
|-----|----------|
| 645 | 15.95166 |
| 646 | 17.05603 |
| 647 | 13.49089 |
| 648 | 14.93265 |
| 649 | 11.93419 |
| 650 | 13.2536  |
| 651 | 12.80805 |
| 652 | 13.31257 |
| 653 | 15.69062 |
| 654 | 14.04485 |
| 655 | 14.50643 |
| 656 | 13.46308 |
| 657 | 12.93592 |
| 658 | 10.89659 |
| 659 | 11.63587 |
| 660 | 15.71487 |
| 661 | 14.3303  |
| 662 | 12.09514 |
| 663 | 14.28274 |
| 664 | 13.31793 |
| 665 | 10.89721 |
| 666 | 12.50849 |
| 667 | 13.42065 |
| 668 | 13.46944 |
| 669 | 13.38189 |
| 670 | 11.81913 |
| 671 | 14.38202 |
| 672 | 14.21351 |
| 673 | 12.4462  |
| 674 | 13.57501 |
| 675 | 12.87599 |

| Total heat release |         |         |         |         | CO2 Producti |         |         |
|--------------------|---------|---------|---------|---------|--------------|---------|---------|
|                    | 0       | 5       | 10      | 15      |              | 0       | 5       |
| Time               | THR     | THR     | THR     | THR     | Time         | CO2P    | CO2P    |
| 0                  | 0.25103 | 0.09452 | 0.15414 | 0.03411 | 0            | 0.00306 | 0.00522 |
| 1                  | 0.27686 | 0.09559 | 0.16059 | 0.03834 | 1            | 0.00363 | 0.00563 |
| 2                  | 0.29618 | 0.10041 | 0.16613 | 0.0432  | 2            | 0.00339 | 0.0051  |
| 3                  | 0.30906 | 0.10411 | 0.17306 | 0.04532 | 3            | 0.00388 | 0.00609 |
| 4                  | 0.31618 | 0.10549 | 0.17881 | 0.04714 | 4            | 0.00312 | 0.00515 |
| 5                  | 0.31994 | 0.10744 | 0.18414 | 0.04691 | 5            | 0.00345 | 0.0049  |
| 6                  | 0.3197  | 0.10942 | 0.18956 | 0.04703 | 6            | 0.00369 | 0.00561 |
| 7                  | 0.32111 | 0.11192 | 0.19095 | 0.04853 | 7            | 0.00379 | 0.0052  |
| 8                  | 0.32757 | 0.1149  | 0.19287 | 0.0514  | 8            | 0.00397 | 0.00563 |
| 9                  | 0.34621 | 0.11875 | 0.19333 | 0.05451 | 9            | 0.00425 | 0.00567 |
| 10                 | 0.37559 | 0.12138 | 0.19467 | 0.0575  | 10           | 0.00371 | 0.00558 |
| 11                 | 0.41164 | 0.1221  | 0.19866 | 0.05912 | 11           | 0.00382 | 0.00565 |
| 12                 | 0.45551 | 0.12403 | 0.20148 | 0.06061 | 12           | 0.00347 | 0.0053  |
| 13                 | 0.50096 | 0.12867 | 0.20546 | 0.0643  | 13           | 0.00418 | 0.005   |
| 14                 | 0.53904 | 0.13033 | 0.21041 | 0.06429 | 14           | 0.0037  | 0.00534 |
| 15                 | 0.57082 | 0.13306 | 0.2134  | 0.06622 | 15           | 0.00318 | 0.00499 |
| 16                 | 0.59414 | 0.13434 | 0.21507 | 0.06935 | 16           | 0.00354 | 0.00578 |
| 17                 | 0.60612 | 0.13881 | 0.21678 | 0.07264 | 17           | 0.00378 | 0.00546 |
| 18                 | 0.60952 | 0.14107 | 0.21978 | 0.07407 | 18           | 0.00353 | 0.00579 |
| 19                 | 0.60825 | 0.14268 | 0.22267 | 0.07684 | 19           | 0.00348 | 0.00549 |
| 20                 | 0.60949 | 0.14393 | 0.22537 | 0.08178 | 20           | 0.0031  | 0.00587 |
| 21                 | 0.62049 | 0.14432 | 0.22865 | 0.0856  | 21           | 0.00356 | 0.00528 |
| 22                 | 0.64036 | 0.14441 | 0.23233 | 0.0899  | 22           | 0.00308 | 0.00526 |
| 23                 | 0.6729  | 0.14478 | 0.23733 | 0.09597 | 23           | 0.0035  | 0.00533 |
| 24                 | 0.71517 | 0.14612 | 0.23978 | 0.10164 | 24           | 0.00336 | 0.00517 |
| 25                 | 0.75766 | 0.14688 | 0.24031 | 0.10232 | 25           | 0.00295 | 0.00522 |
| 26                 | 0.80041 | 0.14707 | 0.24256 | 0.10299 | 26           | 0.00335 | 0.00585 |
| 27                 | 0.84155 | 0.14755 | 0.24359 | 0.10582 | 27           | 0.00267 | 0.00647 |
| 28                 | 0.87754 | 0.14782 | 0.24628 | 0.1107  | 28           | 0.00318 | 0.00618 |
| 29                 | 0.90396 | 0.14843 | 0.24856 | 0.11627 | 29           | 0.0037  | 0.00623 |
| 30                 | 0.92112 | 0.15173 | 0.2514  | 0.12166 | 30           | 0.00309 | 0.00571 |
| 31                 | 0.93276 | 0.15443 | 0.25328 | 0.12781 | 31           | 0.00345 | 0.00592 |
| 32                 | 0.94403 | 0.15609 | 0.25706 | 0.13427 | 32           | 0.00326 | 0.0066  |
| 33                 | 0.96095 | 0.15808 | 0.27416 | 0.14034 | 33           | 0.00327 | 0.0069  |
| 34                 | 0.98584 | 0.16069 | 0.29342 | 0.14195 | 34           | 0.00279 | 0.00665 |
| 35                 | 1.01793 | 0.16075 | 0.29481 | 0.14499 | 35           | 0.00279 | 0.00699 |
| 36                 | 1.04982 | 0.16109 | 0.29596 | 0.15181 | 36           | 0.00317 | 0.00668 |
| 37                 | 1.08898 | 0.1626  | 0.29657 | 0.15892 | 37           | 0.00311 | 0.00621 |
| 38                 | 1.13475 | 0.16572 | 0.29722 | 0.16473 | 38           | 0.00301 | 0.00518 |
| 39                 | 1.17463 | 0.1691  | 0.29982 | 0.1685  | 39           | 0.00332 | 0.00524 |
| 40                 | 1.20588 | 0.17045 | 0.30213 | 0.17504 | 40           | 0.00302 | 0.00574 |
| 41                 | 1.22466 | 0.17155 | 0.30255 | 0.18363 | 41           | 0.00278 | 0.00598 |
| 42                 | 1.23052 | 0.1731  | 0.30333 | 0.19426 | 42           | 0.00301 | 0.0065  |
| 43                 | 1.24218 | 0.17422 | 0.30402 | 0.2065  | 43           | 0.00308 | 0.0061  |
| 44                 | 1.2794  | 0.17426 | 0.30601 | 0.21571 | 44           | 0.00286 | 0.00565 |
| 45                 | 1.31973 | 0.1783  | 0.30975 | 0.22554 | 45           | 0.00264 | 0.00612 |
| 46                 | 1.35736 | 0.17875 | 0.31658 | 0.23701 | 46           | 0.00334 | 0.0059  |
| 47                 | 1.40355 | 0.18303 | 0.31657 | 0.24659 | 47           | 0.00333 | 0.00562 |
| 48                 | 1.4491  | 0.18508 | 0.32009 | 0.25752 | 48           | 0.00323 | 0.0054  |
| 49                 | 1.49606 | 0.19211 | 0.32454 | 0.26985 | 49           | 0.00331 | 0.00586 |
| 50                 | 1.53441 | 0.19848 | 0.32448 | 0.28275 | 50           | 0.00559 | 0.00606 |

|     |         |         |         |         |     |         |         |
|-----|---------|---------|---------|---------|-----|---------|---------|
| 51  | 1.56318 | 0.20068 | 0.32488 | 0.29425 | 51  | 0.00264 | 0.00575 |
| 52  | 1.58621 | 0.20204 | 0.32517 | 0.3021  | 52  | 0.0028  | 0.00582 |
| 53  | 1.60419 | 0.20293 | 0.32761 | 0.31006 | 53  | 0.00306 | 0.00576 |
| 54  | 1.63863 | 0.20331 | 0.33147 | 0.31832 | 54  | 0.00313 | 0.00578 |
| 55  | 1.67727 | 0.20397 | 0.33442 | 0.32592 | 55  | 0.00338 | 0.00554 |
| 56  | 1.70984 | 0.2057  | 0.33656 | 0.33539 | 56  | 0.00341 | 0.00598 |
| 57  | 1.7576  | 0.20884 | 0.33769 | 0.34815 | 57  | 0.00257 | 0.00545 |
| 58  | 1.82043 | 0.21059 | 0.33776 | 0.36221 | 58  | 0.00321 | 0.00542 |
| 59  | 1.88103 | 0.21362 | 0.33883 | 0.37288 | 59  | 0.00282 | 0.00583 |
| 60  | 1.93393 | 0.21626 | 0.34066 | 0.38343 | 60  | 0.00281 | 0.00514 |
| 61  | 1.98375 | 0.21734 | 0.34546 | 0.39535 | 61  | 0.00309 | 0.00592 |
| 62  | 2.02911 | 0.21988 | 0.34579 | 0.40542 | 62  | 0.00362 | 0.00557 |
| 63  | 2.06534 | 0.22311 | 0.34653 | 0.41604 | 63  | 0.00365 | 0.00534 |
| 64  | 2.09234 | 0.22696 | 0.34805 | 0.42968 | 64  | 0.00302 | 0.00498 |
| 65  | 2.11882 | 0.23199 | 0.34981 | 0.44081 | 65  | 0.00346 | 0.00577 |
| 66  | 2.14514 | 0.23718 | 0.35166 | 0.45039 | 66  | 0.00328 | 0.00556 |
| 67  | 2.1722  | 0.24047 | 0.35268 | 0.46179 | 67  | 0.00405 | 0.00576 |
| 68  | 2.1885  | 0.2429  | 0.35556 | 0.47328 | 68  | 0.00381 | 0.00599 |
| 69  | 2.20894 | 0.24489 | 0.36051 | 0.48717 | 69  | 0.00316 | 0.00577 |
| 70  | 2.24625 | 0.24835 | 0.36633 | 0.5012  | 70  | 0.00409 | 0.00582 |
| 71  | 2.29622 | 0.25538 | 0.36987 | 0.51238 | 71  | 0.00338 | 0.00634 |
| 72  | 2.36048 | 0.26632 | 0.37395 | 0.5211  | 72  | 0.00303 | 0.00579 |
| 73  | 2.43586 | 0.2771  | 0.37782 | 0.52812 | 73  | 0.00363 | 0.0059  |
| 74  | 2.52569 | 0.28831 | 0.38209 | 0.53617 | 74  | 0.00365 | 0.00682 |
| 75  | 2.6265  | 0.30425 | 0.38589 | 0.54763 | 75  | 0.00368 | 0.00541 |
| 76  | 2.73694 | 0.32577 | 0.38825 | 0.55718 | 76  | 0.00369 | 0.00456 |
| 77  | 2.85526 | 0.35176 | 0.39435 | 0.56506 | 77  | 0.00323 | 0.00614 |
| 78  | 2.9896  | 0.38589 | 0.40056 | 0.57429 | 78  | 0.00247 | 0.00535 |
| 79  | 3.14364 | 0.43085 | 0.40318 | 0.5857  | 79  | 0.00295 | 0.00614 |
| 80  | 3.29955 | 0.48033 | 0.40555 | 0.59606 | 80  | 0.00335 | 0.00493 |
| 81  | 3.4654  | 0.53648 | 0.40952 | 0.60798 | 81  | 0.00313 | 0.00583 |
| 82  | 3.64927 | 0.60531 | 0.42038 | 0.61884 | 82  | 0.00329 | 0.00572 |
| 83  | 3.85015 | 0.68726 | 0.42558 | 0.6252  | 83  | 0.00321 | 0.00591 |
| 84  | 4.06692 | 0.78074 | 0.42573 | 0.62916 | 84  | 0.00262 | 0.00635 |
| 85  | 4.29577 | 0.88449 | 0.42755 | 0.63247 | 85  | 0.00247 | 0.00656 |
| 86  | 4.54036 | 0.99929 | 0.43135 | 0.64128 | 86  | 0.0025  | 0.00594 |
| 87  | 4.82705 | 1.12505 | 0.43203 | 0.66211 | 87  | 0.00304 | 0.00517 |
| 88  | 5.12196 | 1.25644 | 0.43225 | 0.68094 | 88  | 0.00255 | 0.00548 |
| 89  | 5.39603 | 1.39648 | 0.43249 | 0.69095 | 89  | 0.00263 | 0.00618 |
| 90  | 5.67291 | 1.54502 | 0.43523 | 0.69816 | 90  | 0.00276 | 0.00603 |
| 91  | 5.93672 | 1.70384 | 0.43848 | 0.70341 | 91  | 0.00264 | 0.00599 |
| 92  | 6.19441 | 1.86951 | 0.44209 | 0.70986 | 92  | 0.00308 | 0.00675 |
| 93  | 6.44434 | 2.03493 | 0.44519 | 0.71865 | 93  | 0.00315 | 0.00742 |
| 94  | 6.67413 | 2.20432 | 0.45085 | 0.72567 | 94  | 0.00325 | 0.00683 |
| 95  | 6.89256 | 2.37841 | 0.46003 | 0.73354 | 95  | 0.00256 | 0.0069  |
| 96  | 7.09822 | 2.55499 | 0.4702  | 0.74055 | 96  | 0.0032  | 0.00649 |
| 97  | 7.30114 | 2.73547 | 0.48157 | 0.74498 | 97  | 0.00266 | 0.00694 |
| 98  | 7.50208 | 2.91638 | 0.49251 | 0.7495  | 98  | 0.003   | 0.007   |
| 99  | 7.68472 | 3.09822 | 0.50096 | 0.75396 | 99  | 0.00289 | 0.00749 |
| 100 | 7.86316 | 3.28464 | 0.5087  | 0.75514 | 100 | 0.00292 | 0.00829 |
| 101 | 8.04212 | 3.46992 | 0.52002 | 0.75727 | 101 | 0.00252 | 0.00843 |
| 102 | 8.20958 | 3.65742 | 0.53887 | 0.7667  | 102 | 0.00255 | 0.00852 |
| 103 | 8.36463 | 3.84711 | 0.56006 | 0.77629 | 103 | 0.00372 | 0.01041 |
| 104 | 8.50468 | 4.03174 | 0.58187 | 0.78561 | 104 | 0.00551 | 0.00841 |

|     |          |          |         |         |
|-----|----------|----------|---------|---------|
| 105 | 8.63726  | 4.21626  | 0.60342 | 0.79489 |
| 106 | 8.73908  | 4.40309  | 0.62828 | 0.80235 |
| 107 | 8.83045  | 4.59271  | 0.65919 | 0.81209 |
| 108 | 8.94029  | 4.77968  | 0.69407 | 0.82578 |
| 109 | 9.02414  | 4.96553  | 0.73274 | 0.83561 |
| 110 | 9.10048  | 5.152    | 0.7726  | 0.84357 |
| 111 | 9.19198  | 5.33897  | 0.81347 | 0.85472 |
| 112 | 9.3104   | 5.52483  | 0.85903 | 0.86724 |
| 113 | 9.41039  | 5.70945  | 0.90949 | 0.87677 |
| 114 | 9.49512  | 5.89133  | 0.96213 | 0.886   |
| 115 | 9.58073  | 6.07487  | 1.01687 | 0.89394 |
| 116 | 9.66042  | 6.26066  | 1.08091 | 0.90263 |
| 117 | 9.7457   | 6.44695  | 1.14867 | 0.91257 |
| 118 | 9.82932  | 6.62968  | 1.21838 | 0.92252 |
| 119 | 9.91215  | 6.8147   | 1.29156 | 0.93191 |
| 120 | 9.98891  | 6.99725  | 1.37019 | 0.94231 |
| 121 | 10.04665 | 7.18067  | 1.45184 | 0.95405 |
| 122 | 10.10816 | 7.36453  | 1.53556 | 0.96414 |
| 123 | 10.18174 | 7.5482   | 1.62215 | 0.97514 |
| 124 | 10.27195 | 7.72909  | 1.71116 | 0.98757 |
| 125 | 10.3727  | 7.90955  | 1.80375 | 0.99807 |
| 126 | 10.47451 | 8.09222  | 1.90074 | 1.00947 |
| 127 | 10.5705  | 8.26551  | 2.00014 | 1.0232  |
| 128 | 10.64672 | 8.43938  | 2.10077 | 1.03475 |
| 129 | 10.71567 | 8.61106  | 2.20495 | 1.04482 |
| 130 | 10.78597 | 8.78218  | 2.31415 | 1.05391 |
| 131 | 10.85315 | 8.95611  | 2.42547 | 1.06423 |
| 132 | 10.92421 | 9.12484  | 2.53639 | 1.07447 |
| 133 | 11.00093 | 9.29318  | 2.65    | 1.08431 |
| 134 | 11.08682 | 9.45797  | 2.76505 | 1.09362 |
| 135 | 11.18483 | 9.62145  | 2.88324 | 1.10211 |
| 136 | 11.29356 | 9.77905  | 3.00379 | 1.109   |
| 137 | 11.40576 | 9.93872  | 3.12096 | 1.11593 |
| 138 | 11.52045 | 10.0996  | 3.23788 | 1.12218 |
| 139 | 11.62887 | 10.25616 | 3.35683 | 1.1279  |
| 140 | 11.72785 | 10.41126 | 3.47796 | 1.13664 |
| 141 | 11.81972 | 10.56434 | 3.5973  | 1.1456  |
| 142 | 11.89973 | 10.71584 | 3.71475 | 1.15414 |
| 143 | 11.97137 | 10.86344 | 3.83206 | 1.16277 |
| 144 | 12.0441  | 11.01234 | 3.95065 | 1.17132 |
| 145 | 12.11646 | 11.16204 | 4.06791 | 1.17778 |
| 146 | 12.19286 | 11.31012 | 4.18276 | 1.18262 |
| 147 | 12.28262 | 11.4543  | 4.30091 | 1.18908 |
| 148 | 12.37996 | 11.58967 | 4.42242 | 1.19804 |
| 149 | 12.48217 | 11.72223 | 4.53866 | 1.20625 |
| 150 | 12.58634 | 11.85504 | 4.65498 | 1.20977 |
| 151 | 12.68916 | 11.99892 | 4.77248 | 1.21354 |
| 152 | 12.78061 | 12.13315 | 4.88846 | 1.22057 |
| 153 | 12.86062 | 12.25755 | 5.00335 | 1.22798 |
| 154 | 12.93118 | 12.38885 | 5.11705 | 1.23422 |
| 155 | 12.99069 | 12.5206  | 5.23258 | 1.23835 |
| 156 | 13.03679 | 12.64954 | 5.34664 | 1.24665 |
| 157 | 13.067   | 12.77197 | 5.45726 | 1.25682 |
| 158 | 13.09153 | 12.88961 | 5.5663  | 1.266   |

|     |         |         |
|-----|---------|---------|
| 105 | 0.00323 | 0.00911 |
| 106 | 0.00313 | 0.00872 |
| 107 | 0.00297 | 0.00951 |
| 108 | 0.0179  | 0.00968 |
| 109 | 0.02637 | 0.01056 |
| 110 | 0.02714 | 0.00995 |
| 111 | 0.02831 | 0.01138 |
| 112 | 0.02924 | 0.01047 |
| 113 | 0.03033 | 0.01082 |
| 114 | 0.0313  | 0.01102 |
| 115 | 0.03152 | 0.01086 |
| 116 | 0.03202 | 0.01127 |
| 117 | 0.03324 | 0.01107 |
| 118 | 0.03313 | 0.01147 |
| 119 | 0.03505 | 0.01173 |
| 120 | 0.03263 | 0.0114  |
| 121 | 0.03369 | 0.01198 |
| 122 | 0.03409 | 0.01164 |
| 123 | 0.0345  | 0.01173 |
| 124 | 0.03335 | 0.01168 |
| 125 | 0.03441 | 0.01167 |
| 126 | 0.03428 | 0.01233 |
| 127 | 0.03427 | 0.01232 |
| 128 | 0.03439 | 0.01065 |
| 129 | 0.03619 | 0.01198 |
| 130 | 0.0324  | 0.01253 |
| 131 | 0.03522 | 0.01207 |
| 132 | 0.03438 | 0.01127 |
| 133 | 0.03523 | 0.01213 |
| 134 | 0.0342  | 0.01256 |
| 135 | 0.03535 | 0.01222 |
| 136 | 0.03467 | 0.01207 |
| 137 | 0.03472 | 0.01248 |
| 138 | 0.03486 | 0.01189 |
| 139 | 0.03531 | 0.01227 |
| 140 | 0.03515 | 0.01135 |
| 141 | 0.03454 | 0.01222 |
| 142 | 0.03436 | 0.01247 |
| 143 | 0.03462 | 0.01296 |
| 144 | 0.03376 | 0.01224 |
| 145 | 0.03371 | 0.01347 |
| 146 | 0.03467 | 0.01205 |
| 147 | 0.0336  | 0.01144 |
| 148 | 0.03336 | 0.0103  |
| 149 | 0.03351 | 0.01205 |
| 150 | 0.03347 | 0.01258 |
| 151 | 0.03278 | 0.01214 |
| 152 | 0.03202 | 0.01162 |
| 153 | 0.03233 | 0.01227 |
| 154 | 0.03136 | 0.01229 |
| 155 | 0.03241 | 0.0121  |
| 156 | 0.03206 | 0.0124  |
| 157 | 0.03147 | 0.01244 |
| 158 | 0.03077 | 0.01266 |



|     |          |          |          |         |
|-----|----------|----------|----------|---------|
| 159 | 13.11955 | 13.00853 | 5.67774  | 1.27265 |
| 160 | 13.152   | 13.12791 | 5.78762  | 1.27749 |
| 161 | 13.19529 | 13.24827 | 5.89536  | 1.28808 |
| 162 | 13.23899 | 13.36642 | 6.0002   | 1.30241 |
| 163 | 13.2893  | 13.47866 | 6.10538  | 1.31547 |
| 164 | 13.34503 | 13.58531 | 6.20894  | 1.32576 |
| 165 | 13.40301 | 13.69151 | 6.3158   | 1.33481 |
| 166 | 13.47091 | 13.7945  | 6.42112  | 1.3466  |
| 167 | 13.53856 | 13.89417 | 6.52224  | 1.36505 |
| 168 | 13.59457 | 14.00049 | 6.62275  | 1.38365 |
| 169 | 13.63667 | 14.11004 | 6.72161  | 1.39927 |
| 170 | 13.66869 | 14.21392 | 6.81705  | 1.4168  |
| 171 | 13.69672 | 14.31367 | 6.91372  | 1.44169 |
| 172 | 13.71546 | 14.41277 | 7.00912  | 1.4692  |
| 173 | 13.72966 | 14.51786 | 7.10304  | 1.49517 |
| 174 | 13.74876 | 14.61809 | 7.19632  | 1.52274 |
| 175 | 13.77781 | 14.71697 | 7.28842  | 1.55124 |
| 176 | 13.81236 | 14.81711 | 7.38032  | 1.58257 |
| 177 | 13.85971 | 14.91184 | 7.46245  | 1.61942 |
| 178 | 13.90959 | 15.00456 | 7.54484  | 1.66    |
| 179 | 13.96137 | 15.09472 | 7.62973  | 1.70361 |
| 180 | 14.01387 | 15.18411 | 7.7165   | 1.74862 |
| 181 | 14.06427 | 15.26782 | 7.79847  | 1.79437 |
| 182 | 14.09972 | 15.34907 | 7.88017  | 1.83475 |
| 183 | 14.12576 | 15.43356 | 7.96595  | 1.88025 |
| 184 | 14.13932 | 15.52017 | 8.04896  | 1.93145 |
| 185 | 14.15448 | 15.6089  | 8.13018  | 1.98316 |
| 186 | 14.18404 | 15.69605 | 8.21009  | 2.03853 |
| 187 | 14.22297 | 15.78133 | 8.28869  | 2.09508 |
| 188 | 14.27138 | 15.86467 | 8.36823  | 2.15051 |
| 189 | 14.32343 | 15.94606 | 8.44698  | 2.20565 |
| 190 | 14.3988  | 16.02745 | 8.51996  | 2.26004 |
| 191 | 14.46721 | 16.11049 | 8.59421  | 2.31512 |
| 192 | 14.50524 | 16.19479 | 8.67055  | 2.36997 |
| 193 | 14.5367  | 16.27796 | 8.74407  | 2.42605 |
| 194 | 14.55274 | 16.36076 | 8.81748  | 2.48185 |
| 195 | 14.56249 | 16.44087 | 8.89321  | 2.53652 |
| 196 | 14.57388 | 16.51963 | 8.9653   | 2.58711 |
| 197 | 14.59155 | 16.59687 | 9.03513  | 2.6343  |
| 198 | 14.61902 | 16.67163 | 9.10723  | 2.684   |
| 199 | 14.65758 | 16.74411 | 9.17794  | 2.73435 |
| 200 | 14.7021  | 16.81493 | 9.24618  | 2.78293 |
| 201 | 14.74461 | 16.88866 | 9.31247  | 2.83074 |
| 202 | 14.78398 | 16.96143 | 9.37837  | 2.87857 |
| 203 | 14.8129  | 17.03003 | 9.44369  | 2.92672 |
| 204 | 14.83574 | 17.09716 | 9.50759  | 2.97104 |
| 205 | 14.85295 | 17.16157 | 9.57561  | 3.01121 |
| 206 | 14.86704 | 17.2267  | 9.64414  | 3.05323 |
| 207 | 14.88419 | 17.29113 | 9.70609  | 3.09488 |
| 208 | 14.90755 | 17.35497 | 9.76957  | 3.13622 |
| 209 | 14.94275 | 17.41683 | 9.83199  | 3.17767 |
| 210 | 14.97861 | 17.47591 | 9.8916   | 3.21904 |
| 211 | 15.01738 | 17.53356 | 9.94978  | 3.26106 |
| 212 | 15.06017 | 17.5897  | 10.00802 | 3.29945 |

|     |         |         |
|-----|---------|---------|
| 159 | 0.03353 | 0.01235 |
| 160 | 0.02982 | 0.01235 |
| 161 | 0.02977 | 0.01333 |
| 162 | 0.02914 | 0.01236 |
| 163 | 0.02974 | 0.01184 |
| 164 | 0.03036 | 0.01217 |
| 165 | 0.0293  | 0.0121  |
| 166 | 0.02928 | 0.01227 |
| 167 | 0.02813 | 0.01319 |
| 168 | 0.02751 | 0.01385 |
| 169 | 0.02659 | 0.01253 |
| 170 | 0.02702 | 0.01264 |
| 171 | 0.02622 | 0.01279 |
| 172 | 0.02639 | 0.01248 |
| 173 | 0.02535 | 0.01158 |
| 174 | 0.02514 | 0.01183 |
| 175 | 0.02493 | 0.01231 |
| 176 | 0.02465 | 0.01301 |
| 177 | 0.02463 | 0.01408 |
| 178 | 0.02429 | 0.01257 |
| 179 | 0.02527 | 0.01247 |
| 180 | 0.02386 | 0.01187 |
| 181 | 0.02428 | 0.01242 |
| 182 | 0.02337 | 0.01114 |
| 183 | 0.02293 | 0.01106 |
| 184 | 0.02259 | 0.01024 |
| 185 | 0.02224 | 0.0118  |
| 186 | 0.02172 | 0.01134 |
| 187 | 0.02163 | 0.01109 |
| 188 | 0.02133 | 0.01123 |
| 189 | 0.0215  | 0.01135 |
| 190 | 0.02078 | 0.0103  |
| 191 | 0.0206  | 0.01095 |
| 192 | 0.02035 | 0.01109 |
| 193 | 0.02033 | 0.01071 |
| 194 | 0.01998 | 0.01048 |
| 195 | 0.02023 | 0.01034 |
| 196 | 0.0203  | 0.01109 |
| 197 | 0.01997 | 0.01065 |
| 198 | 0.01766 | 0.00993 |
| 199 | 0.01967 | 0.01026 |
| 200 | 0.0193  | 0.01048 |
| 201 | 0.01852 | 0.00993 |
| 202 | 0.01899 | 0.00996 |
| 203 | 0.01962 | 0.00996 |
| 204 | 0.01872 | 0.01028 |
| 205 | 0.01877 | 0.0096  |
| 206 | 0.01847 | 0.0095  |
| 207 | 0.01824 | 0.00974 |
| 208 | 0.0184  | 0.00975 |
| 209 | 0.01851 | 0.00976 |
| 210 | 0.0176  | 0.00954 |
| 211 | 0.01729 | 0.01039 |
| 212 | 0.01716 | 0.0104  |

|     |          |          |          |         |
|-----|----------|----------|----------|---------|
| 213 | 15.10084 | 17.64256 | 10.06587 | 3.33554 |
| 214 | 15.13218 | 17.69059 | 10.11917 | 3.37377 |
| 215 | 15.14749 | 17.73864 | 10.17496 | 3.41744 |
| 216 | 15.15692 | 17.78364 | 10.23266 | 3.45755 |
| 217 | 15.16245 | 17.82614 | 10.28735 | 3.49843 |
| 218 | 15.16846 | 17.86617 | 10.34148 | 3.54455 |
| 219 | 15.17098 | 17.90432 | 10.396   | 3.59452 |
| 220 | 15.18272 | 17.94312 | 10.45052 | 3.64815 |
| 221 | 15.22171 | 17.97966 | 10.50523 | 3.70044 |
| 222 | 15.26402 | 18.01334 | 10.55801 | 3.75281 |
| 223 | 15.31315 | 18.04239 | 10.60994 | 3.80743 |
| 224 | 15.35248 | 18.07106 | 10.66179 | 3.86548 |
| 225 | 15.3843  | 18.09988 | 10.71433 | 3.92466 |
| 226 | 15.41349 | 18.12384 | 10.76054 | 3.98664 |
| 227 | 15.43332 | 18.14504 | 10.80767 | 4.04894 |
| 228 | 15.44456 | 18.16566 | 10.85796 | 4.11315 |
| 229 | 15.44976 | 18.18355 | 10.90748 | 4.1813  |
| 230 | 15.45883 | 18.20069 | 10.95759 | 4.24782 |
| 231 | 15.47646 | 18.21751 | 11.0077  | 4.31501 |
| 232 | 15.49986 | 18.22157 | 11.05748 | 4.3848  |
| 233 | 15.52961 | 18.22487 | 11.1067  | 4.45323 |
| 234 | 15.57003 | 18.23554 | 11.15446 | 4.5185  |
| 235 | 15.6191  | 18.24444 | 11.20101 | 4.58189 |
| 236 | 15.66935 | 18.25443 | 11.24798 | 4.64729 |
| 237 | 15.71546 | 18.2645  | 11.29184 | 4.71673 |
| 238 | 15.75651 | 18.27406 | 11.33513 | 4.78388 |
| 239 | 15.79108 | 18.27837 | 11.38434 | 4.85303 |
| 240 | 15.82054 | 18.28074 | 11.43684 | 4.92112 |
| 241 | 15.83811 | 18.28198 | 11.48967 | 4.99033 |
| 242 | 15.84653 | 18.28873 | 11.54916 | 5.0611  |
| 243 | 15.86299 | 18.29285 | 11.60833 | 5.13095 |
| 244 | 15.88015 | 18.30364 | 11.66843 | 5.19799 |
| 245 | 15.90269 | 18.31258 | 11.71845 | 5.26304 |
| 246 | 15.93389 | 18.31479 | 11.76437 | 5.32877 |
| 247 | 15.96707 | 18.31529 | 11.8089  | 5.39569 |
| 248 | 16.01231 | 18.31602 | 11.85497 | 5.46279 |
| 249 | 16.06669 | 18.32191 | 11.89904 | 5.52834 |
| 250 | 16.15157 | 18.32912 | 11.9423  | 5.59342 |
| 251 | 16.23997 | 18.33243 | 11.98448 | 5.65721 |
| 252 | 16.29926 | 18.33828 | 12.02959 | 5.72082 |
| 253 | 16.3369  | 18.34551 | 12.07711 | 5.78364 |
| 254 | 16.35132 | 18.35157 | 12.12347 | 5.84625 |
| 255 | 16.36345 | 18.35763 | 12.16897 | 5.90223 |
| 256 | 16.38327 | 18.36176 | 12.21171 | 5.96288 |
| 257 | 16.40395 | 18.36611 | 12.25519 | 6.02645 |
| 258 | 16.41593 | 18.3724  | 12.29805 | 6.08931 |
| 259 | 16.42006 | 18.37766 | 12.34152 | 6.15191 |
| 260 | 16.42461 | 18.38236 | 12.38561 | 6.21294 |
| 261 | 16.43658 | 18.38637 | 12.42924 | 6.27574 |
| 262 | 16.46121 | 18.39091 | 12.47272 | 6.33901 |
| 263 | 16.50089 | 18.39382 | 12.51423 | 6.40343 |
| 264 | 16.54527 | 18.3992  | 12.55572 | 6.46603 |
| 265 | 16.6009  | 18.40588 | 12.59784 | 6.52458 |
| 266 | 16.66317 | 18.41147 | 12.64021 | 6.58223 |

|     |         |         |
|-----|---------|---------|
| 213 | 0.01664 | 0.00913 |
| 214 | 0.01745 | 0.00987 |
| 215 | 0.01622 | 0.00899 |
| 216 | 0.01605 | 0.00925 |
| 217 | 0.01551 | 0.0092  |
| 218 | 0.01363 | 0.00975 |
| 219 | 0.0152  | 0.01049 |
| 220 | 0.01507 | 0.00923 |
| 221 | 0.01399 | 0.0094  |
| 222 | 0.01455 | 0.00839 |
| 223 | 0.01411 | 0.00874 |
| 224 | 0.01339 | 0.00902 |
| 225 | 0.01345 | 0.01056 |
| 226 | 0.01317 | 0.00923 |
| 227 | 0.01181 | 0.00906 |
| 228 | 0.0114  | 0.00919 |
| 229 | 0.01201 | 0.00922 |
| 230 | 0.01118 | 0.0087  |
| 231 | 0.01044 | 0.0086  |
| 232 | 0.01002 | 0.00878 |
| 233 | 0.00968 | 0.00835 |
| 234 | 0.01047 | 0.00861 |
| 235 | 0.00912 | 0.00815 |
| 236 | 0.00869 | 0.0086  |
| 237 | 0.00925 | 0.00846 |
| 238 | 0.00781 | 0.00772 |
| 239 | 0.00849 | 0.00808 |
| 240 | 0.00928 | 0.00835 |
| 241 | 0.00833 | 0.00781 |
| 242 | 0.00741 | 0.00822 |
| 243 | 0.00744 | 0.00733 |
| 244 | 0.0067  | 0.00783 |
| 245 | 0.00547 | 0.00831 |
| 246 | 0.0065  | 0.00716 |
| 247 | 0.00611 | 0.00779 |
| 248 | 0.00573 | 0.00726 |
| 249 | 0.0054  | 0.00691 |
| 250 | 0.00509 | 0.00783 |
| 251 | 0.00409 | 0.00718 |
| 252 | 0.00471 | 0.00745 |
| 253 | 0.00434 | 0.00747 |
| 254 | 0.0028  | 0.00815 |
| 255 | 0.00789 | 0.00785 |
| 256 | 0.00387 | 0.00803 |
| 257 | 0.00342 | 0.00705 |
| 258 | 0.00354 | 0.008   |
| 259 | 0.00348 | 0.0081  |
| 260 | 0.0033  | 0.00722 |
| 261 | 0.00288 | 0.00807 |
| 262 | 0.00288 | 0.00793 |
| 263 | 0.00303 | 0.00817 |
| 264 | 0.00276 | 0.00812 |
| 265 | 0.00296 | 0.00797 |
| 266 | 0.00269 | 0.0074  |

|     |          |          |          |         |
|-----|----------|----------|----------|---------|
| 267 | 16.7243  | 18.41728 | 12.68008 | 6.64067 |
| 268 | 16.77906 | 18.42576 | 12.70834 | 6.69964 |
| 269 | 16.81683 | 18.43506 | 12.73664 | 6.75634 |
| 270 | 16.84382 | 18.44562 | 12.77697 | 6.81068 |
| 271 | 16.86409 | 18.45308 | 12.81997 | 6.86657 |
| 272 | 16.8807  | 18.46266 | 12.8646  | 6.92303 |
| 273 | 16.88949 | 18.47377 | 12.90519 | 6.98165 |
| 274 | 16.88947 | 18.47981 | 12.94518 | 7.04088 |
| 275 | 16.89599 | 18.48635 | 12.98493 | 7.09819 |
| 276 | 16.90904 | 18.49172 | 13.02211 | 7.15389 |
| 277 | 16.93314 | 18.49559 | 13.06103 | 7.21005 |
| 278 | 16.9748  | 18.50191 | 13.09873 | 7.2647  |
| 279 | 17.01938 | 18.50551 | 13.13684 | 7.31956 |
| 280 | 17.07122 | 18.50853 | 13.17445 | 7.3753  |
| 281 | 17.12581 | 18.50843 | 13.21233 | 7.42894 |
| 282 | 17.17641 | 18.51214 | 13.24927 | 7.48315 |
| 283 | 17.22205 | 18.51761 | 13.28689 | 7.53782 |
| 284 | 17.25832 | 18.52513 | 13.32389 | 7.59033 |
| 285 | 17.29351 | 18.52824 | 13.36189 | 7.64208 |
| 286 | 17.31672 | 18.53468 | 13.40256 | 7.69583 |
| 287 | 17.33123 | 18.54277 | 13.44155 | 7.74662 |
| 288 | 17.34141 | 18.54989 | 13.47375 | 7.79866 |
| 289 | 17.3467  | 18.55863 | 13.5057  | 7.85022 |
| 290 | 17.36346 | 18.5688  | 13.54312 | 7.89769 |
| 291 | 17.3866  | 18.57694 | 13.57855 | 7.9485  |
| 292 | 17.41034 | 18.58235 | 13.61373 | 8.00271 |
| 293 | 17.44719 | 18.58973 | 13.6473  | 8.05531 |
| 294 | 17.49713 | 18.60265 | 13.67898 | 8.10598 |
| 295 | 17.54898 | 18.61553 | 13.71072 | 8.15695 |
| 296 | 17.59272 | 18.62238 | 13.74325 | 8.20783 |
| 297 | 17.63398 | 18.62788 | 13.77698 | 8.2569  |
| 298 | 17.67697 | 18.63496 | 13.80949 | 8.30465 |
| 299 | 17.70898 | 18.64198 | 13.84079 | 8.35248 |
| 300 | 17.72239 | 18.6522  | 13.87313 | 8.39938 |
| 301 | 17.73358 | 18.66137 | 13.91152 | 8.44807 |
| 302 | 17.74888 | 18.66667 | 13.94452 | 8.49761 |
| 303 | 17.7671  | 18.67366 | 13.97411 | 8.54218 |
| 304 | 17.78815 | 18.68097 | 14.0041  | 8.58398 |
| 305 | 17.81554 | 18.68692 | 14.03517 | 8.62908 |
| 306 | 17.84649 | 18.6935  | 14.06542 | 8.67489 |
| 307 | 17.8916  | 18.69875 | 14.09544 | 8.71972 |
| 308 | 17.9428  | 18.70751 | 14.12475 | 8.7628  |
| 309 | 17.9914  | 18.71873 | 14.15274 | 8.81124 |
| 310 | 18.03809 | 18.73121 | 14.18093 | 8.8587  |
| 311 | 18.06967 | 18.73771 | 14.20623 | 8.90064 |
| 312 | 18.09519 | 18.75212 | 14.2305  | 8.94374 |
| 313 | 18.11809 | 18.76668 | 14.25507 | 8.9887  |
| 314 | 18.12553 | 18.77157 | 14.28196 | 9.03138 |
| 315 | 18.14008 | 18.77764 | 14.3096  | 9.07406 |
| 316 | 18.17201 | 18.78509 | 14.33569 | 9.11596 |
| 317 | 18.21287 | 18.79175 | 14.3605  | 9.16035 |
| 318 | 18.25686 | 18.80056 | 14.38078 | 9.20629 |
| 319 | 18.30335 | 18.80615 | 14.40138 | 9.24968 |
| 320 | 18.35604 | 18.81358 | 14.42376 | 9.29209 |

|     |         |         |
|-----|---------|---------|
| 267 | 0.00347 | 0.00763 |
| 268 | 0.00306 | 0.00792 |
| 269 | 0.00268 | 0.00846 |
| 270 | 0.00286 | 0.00821 |
| 271 | 0.00293 | 0.00755 |
| 272 | 0.00329 | 0.00689 |
| 273 | 0.00329 | 0.00639 |
| 274 | 0.00341 | 0.00727 |
| 275 | 0.00302 | 0.00717 |
| 276 | 0.0027  | 0.00669 |
| 277 | 0.00327 | 0.0064  |
| 278 | 0.00382 | 0.00685 |
| 279 | 0.00283 | 0.007   |
| 280 | 0.0049  | 0.00667 |
| 281 | 0.00369 | 0.00659 |
| 282 | 0.00384 | 0.00561 |
| 283 | 0.00313 | 0.00634 |
| 284 | 0.00296 | 0.00653 |
| 285 | 0.00376 | 0.00634 |
| 286 | 0.00401 | 0.00656 |
| 287 | 0.00334 | 0.0066  |
| 288 | 0.00337 | 0.00633 |
| 289 | 0.00323 | 0.00723 |
| 290 | 0.00348 | 0.00608 |
| 291 | 0.00363 | 0.00566 |
| 292 | 0.00384 | 0.00659 |
| 293 | 0.00382 | 0.00676 |
| 294 | 0.00352 | 0.00665 |
| 295 | 0.0035  | 0.00681 |
| 296 | 0.00333 | 0.00649 |
| 297 | 0.00406 | 0.00665 |
| 298 | 0.00427 | 0.00612 |
| 299 | 0.00325 | 0.00638 |
| 300 | 0.00401 | 0.00678 |
| 301 | 0.00548 | 0.0062  |
| 302 | 0.00334 | 0.00652 |
| 303 | 0.00307 | 0.00609 |
| 304 | 0.00305 | 0.00693 |
| 305 | 0.00392 | 0.00707 |
| 306 | 0.00308 | 0.00625 |
| 307 | 0.00378 | 0.00594 |
| 308 | 0.0031  | 0.00641 |
| 309 | 0.00281 | 0.00583 |
| 310 | 0.00312 | 0.006   |
| 311 | 0.00358 | 0.00602 |
| 312 | 0.00302 | 0.00614 |
| 313 | 0.00321 | 0.00662 |
| 314 | 0.00339 | 0.00606 |
| 315 | 0.00362 | 0.00584 |
| 316 | 0.00479 | 0.00637 |
| 317 | 0.00337 | 0.00624 |
| 318 | 0.00325 | 0.00637 |
| 319 | 0.00306 | 0.00658 |
| 320 | 0.00272 | 0.00676 |

|     |          |          |          |          |
|-----|----------|----------|----------|----------|
| 321 | 18.40917 | 18.82395 | 14.44704 | 9.34123  |
| 322 | 18.44642 | 18.83223 | 14.47359 | 9.38802  |
| 323 | 18.47375 | 18.83924 | 14.49934 | 9.4293   |
| 324 | 18.49979 | 18.84929 | 14.52759 | 9.46947  |
| 325 | 18.52005 | 18.85203 | 14.55428 | 9.507    |
| 326 | 18.53805 | 18.85702 | 14.57898 | 9.54531  |
| 327 | 18.54998 | 18.8653  | 14.60389 | 9.59214  |
| 328 | 18.57213 | 18.87409 | 14.6268  | 9.63522  |
| 329 | 18.60499 | 18.88263 | 14.64997 | 9.67742  |
| 330 | 18.65272 | 18.8938  | 14.67524 | 9.71942  |
| 331 | 18.70235 | 18.90294 | 14.70012 | 9.75858  |
| 332 | 18.75312 | 18.90298 | 14.7236  | 9.79777  |
| 333 | 18.81474 | 18.90555 | 14.74691 | 9.83481  |
| 334 | 18.87298 | 18.91458 | 14.76914 | 9.8723   |
| 335 | 18.92684 | 18.92486 | 14.79277 | 9.90741  |
| 336 | 18.97679 | 18.93424 | 14.81543 | 9.94868  |
| 337 | 19.00325 | 18.94214 | 14.83507 | 9.98854  |
| 338 | 19.01873 | 18.94976 | 14.85456 | 10.02032 |
| 339 | 19.04193 | 18.95895 | 14.87565 | 10.05215 |
| 340 | 19.05886 | 18.96759 | 14.89541 | 10.08594 |
| 341 | 19.07229 | 18.97431 | 14.91484 | 10.12036 |
| 342 | 19.09201 | 18.98179 | 14.93484 | 10.15459 |
| 343 | 19.12003 | 18.98844 | 14.95375 | 10.18821 |
| 344 | 19.16008 | 18.99551 | 14.97355 | 10.22385 |
| 345 | 19.20998 | 19.00352 | 14.99616 | 10.26118 |
| 346 | 19.2578  | 19.01398 | 15.01464 | 10.29253 |
| 347 | 19.3146  | 19.0197  | 15.0327  | 10.31843 |
| 348 | 19.37639 | 19.02541 | 15.0493  | 10.35247 |
| 349 | 19.4387  | 19.0314  | 15.06674 | 10.38732 |
| 350 | 19.49711 | 19.03754 | 15.08301 | 10.42189 |
| 351 | 19.54503 | 19.04526 | 15.09867 | 10.45898 |
| 352 | 19.57823 | 19.05504 | 15.11751 | 10.49726 |
| 353 | 19.59482 | 19.06589 | 15.13819 | 10.53484 |
| 354 | 19.6061  | 19.07482 | 15.15979 | 10.57093 |
| 355 | 19.61798 | 19.07931 | 15.17927 | 10.60702 |
| 356 | 19.63726 | 19.08388 | 15.19824 | 10.64286 |
| 357 | 19.65713 | 19.08783 | 15.21736 | 10.68104 |
| 358 | 19.68538 | 19.09083 | 15.23419 | 10.71876 |
| 359 | 19.71381 | 19.09383 | 15.25545 | 10.75569 |
| 360 | 19.7472  | 19.09658 | 15.27855 | 10.79676 |
| 361 | 19.80005 | 19.10057 | 15.29848 | 10.83761 |
| 362 | 19.85531 | 19.10676 | 15.31792 | 10.88027 |
| 363 | 19.91831 | 19.10924 | 15.33698 | 10.92412 |
| 364 | 19.98907 | 19.11003 | 15.35639 | 10.96637 |
| 365 | 20.05567 | 19.11222 | 15.3727  | 11.00806 |
| 366 | 20.0981  | 19.11564 | 15.39074 | 11.04632 |
| 367 | 20.11604 | 19.11719 | 15.40809 | 11.08612 |
| 368 | 20.11634 | 19.12145 | 15.42369 | 11.12943 |
| 369 | 20.12947 | 19.12346 | 15.43836 | 11.17184 |
| 370 | 20.15057 | 19.12432 | 15.45376 | 11.21219 |
| 371 | 20.17349 | 19.13259 | 15.46864 | 11.25183 |
| 372 | 20.20876 | 19.13581 | 15.48425 | 11.29229 |
| 373 | 20.24751 | 19.13884 | 15.49898 | 11.33432 |
| 374 | 20.28904 | 19.14281 | 15.51426 | 11.37369 |

|     |         |         |
|-----|---------|---------|
| 321 | 0.00307 | 0.00658 |
| 322 | 0.00298 | 0.00645 |
| 323 | 0.0034  | 0.00654 |
| 324 | 0.00357 | 0.00661 |
| 325 | 0.00299 | 0.00728 |
| 326 | 0.00309 | 0.00601 |
| 327 | 0.00356 | 0.00632 |
| 328 | 0.00396 | 0.00745 |
| 329 | 0.00344 | 0.00688 |
| 330 | 0.00532 | 0.00641 |
| 331 | 0.00421 | 0.00694 |
| 332 | 0.00398 | 0.00578 |
| 333 | 0.0031  | 0.0062  |
| 334 | 0.00413 | 0.00585 |
| 335 | 0.00364 | 0.00612 |
| 336 | 0.00287 | 0.00658 |
| 337 | 0.00313 | 0.00721 |
| 338 | 0.00359 | 0.00566 |
| 339 | 0.00355 | 0.00641 |
| 340 | 0.00384 | 0.00601 |
| 341 | 0.00404 | 0.00581 |
| 342 | 0.00345 | 0.0061  |
| 343 | 0.00359 | 0.00596 |
| 344 | 0.00358 | 0.00535 |
| 345 | 0.00332 | 0.00616 |
| 346 | 0.00325 | 0.0059  |
| 347 | 0.0043  | 0.00598 |
| 348 | 0.00321 | 0.00595 |
| 349 | 0.00339 | 0.006   |
| 350 | 0.00367 | 0.00548 |
| 351 | 0.00321 | 0.00614 |
| 352 | 0.00306 | 0.00592 |
| 353 | 0.00292 | 0.00656 |
| 354 | 0.00307 | 0.00614 |
| 355 | 0.00357 | 0.00692 |
| 356 | 0.00324 | 0.00601 |
| 357 | 0.0029  | 0.0061  |
| 358 | 0.00446 | 0.00631 |
| 359 | 0.00271 | 0.00661 |
| 360 | 0.00322 | 0.00652 |
| 361 | 0.00295 | 0.00631 |
| 362 | 0.00305 | 0.00648 |
| 363 | 0.00302 | 0.0065  |
| 364 | 0.00273 | 0.00601 |
| 365 | 0.00303 | 0.00604 |
| 366 | 0.0033  | 0.00679 |
| 367 | 0.00295 | 0.00604 |
| 368 | 0.00275 | 0.0057  |
| 369 | 0.00363 | 0.0059  |
| 370 | 0.00314 | 0.00617 |
| 371 | 0.00301 | 0.00579 |
| 372 | 0.00315 | 0.00592 |
| 373 | 0.00341 | 0.0061  |
| 374 | 0.00317 | 0.00538 |

|     |          |          |          |          |
|-----|----------|----------|----------|----------|
| 375 | 20.34557 | 19.14669 | 15.52946 | 11.41091 |
| 376 | 20.42642 | 19.15181 | 15.54113 | 11.44815 |
| 377 | 20.49917 | 19.15894 | 15.55232 | 11.48333 |
| 378 | 20.55664 | 19.16542 | 15.56402 | 11.51844 |
| 379 | 20.60502 | 19.17015 | 15.5744  | 11.5546  |
| 380 | 20.64051 | 19.1747  | 15.58531 | 11.59349 |
| 381 | 20.67362 | 19.17777 | 15.5987  | 11.63513 |
| 382 | 20.70129 | 19.18109 | 15.60805 | 11.67594 |
| 383 | 20.72369 | 19.1845  | 15.61716 | 11.71571 |
| 384 | 20.74551 | 19.18896 | 15.6262  | 11.75614 |
| 385 | 20.77715 | 19.19425 | 15.63214 | 11.79646 |
| 386 | 20.81164 | 19.20119 | 15.64696 | 11.8351  |
| 387 | 20.85523 | 19.20867 | 15.663   | 11.87222 |
| 388 | 20.90768 | 19.21456 | 15.66917 | 11.90949 |
| 389 | 20.95612 | 19.21939 | 15.67493 | 11.93264 |
| 390 | 20.9991  | 19.22474 | 15.67946 | 11.96453 |
| 391 | 21.02749 | 19.22876 | 15.6855  | 12.00471 |
| 392 | 21.0481  | 19.22939 | 15.69284 | 12.04323 |
| 393 | 21.06868 | 19.2324  | 15.6995  | 12.08296 |
| 394 | 21.07948 | 19.23706 | 15.70441 | 12.12182 |
| 395 | 21.086   | 19.24086 | 15.70944 | 12.15769 |
| 396 | 21.09742 | 19.24351 | 15.71387 | 12.19493 |
| 397 | 21.1154  | 19.24542 | 15.71796 | 12.22945 |
| 398 | 21.13976 | 19.24859 | 15.72239 | 12.26281 |
| 399 | 21.17998 | 19.25093 | 15.72889 | 12.29548 |
| 400 | 21.22629 | 19.2543  | 15.73493 | 12.33011 |
| 401 | 21.27398 | 19.25798 | 15.7388  | 12.36692 |
| 402 | 21.32111 | 19.26142 | 15.74588 | 12.40377 |
| 403 | 21.3682  | 19.26494 | 15.75393 | 12.44003 |
| 404 | 21.41017 | 19.26759 | 15.75785 | 12.47433 |
| 405 | 21.4437  | 19.27104 | 15.76132 | 12.51344 |
| 406 | 21.46639 | 19.27536 | 15.76493 | 12.55305 |
| 407 | 21.4825  | 19.28652 | 15.76833 | 12.59092 |
| 408 | 21.49856 | 19.30276 | 15.77114 | 12.62866 |
| 409 | 21.51607 | 19.31367 | 15.77372 | 12.66532 |
| 410 | 21.5382  | 19.31598 | 15.77941 | 12.70192 |
|     |          | 19.31655 | 15.78764 | 12.73764 |
|     |          | 19.32055 | 15.7989  | 12.77479 |
|     |          | 19.32393 | 15.81037 | 12.81476 |
|     |          | 19.32712 | 15.82068 | 12.85426 |
|     |          | 19.3333  | 15.83189 | 12.88877 |
|     |          |          | 15.83903 | 12.92331 |
|     |          |          | 15.84349 | 12.96112 |
|     |          |          | 15.84852 | 12.99926 |
|     |          |          | 15.85149 | 13.03606 |
|     |          |          | 15.85397 | 13.07236 |
|     |          |          | 15.86023 | 13.10614 |
|     |          |          | 15.86793 | 13.13514 |
|     |          |          | 15.87867 | 13.16809 |
|     |          |          | 15.88763 | 13.20762 |
|     |          |          | 15.89523 | 13.24704 |
|     |          |          | 15.90201 | 13.28216 |
|     |          |          | 15.90538 | 13.31719 |
|     |          |          | 15.91007 | 13.35411 |

|     |         |         |
|-----|---------|---------|
| 375 | 0.00338 | 0.0054  |
| 376 | 0.00307 | 0.00558 |
| 377 | 0.00261 | 0.00547 |
| 378 | 0.00288 | 0.00567 |
| 379 | 0.00312 | 0.00573 |
| 380 | 0.00238 | 0.0049  |
| 381 | 0.00327 | 0.00511 |
| 382 | 0.00297 | 0.00511 |
| 383 | 0.00274 | 0.0046  |
| 384 | 0.00341 | 0.00521 |
| 385 | 0.00331 | 0.00594 |
| 386 | 0.0035  | 0.00572 |
| 387 | 0.00344 | 0.00542 |
| 388 | 0.00376 | 0.00569 |
| 389 | 0.00319 | 0.00544 |
| 390 | 0.00329 | 0.00471 |
| 391 | 0.00359 | 0.00567 |
| 392 | 0.00405 | 0.0052  |
| 393 | 0.00327 | 0.00552 |
| 394 | 0.00308 | 0.00578 |
| 395 | 0.00287 | 0.00519 |
| 396 | 0.00296 | 0.00537 |
| 397 | 0.00317 | 0.00575 |
| 398 | 0.00348 | 0.00501 |
| 399 | 0.00383 | 0.00528 |
| 400 | 0.00233 | 0.00581 |
| 401 | 0.00679 | 0.00619 |
| 402 | 0.00309 | 0.00567 |
| 403 | 0.00344 | 0.00645 |
| 404 | 0.00301 | 0.00575 |
| 405 | 0.00283 | 0.0051  |
| 406 | 0.00284 | 0.00546 |
| 407 | 0.00284 | 0.00544 |
| 408 | 0.00331 | 0.00502 |
| 409 | 0.00301 | 0.00494 |
| 410 | 0.00339 | 0.00602 |
|     | 0.00323 |         |
|     | 0.00316 |         |
|     | 0.00305 |         |
|     | 0.00314 |         |
|     | 0.00262 |         |

|          |          |
|----------|----------|
| 15.9096  | 13.38892 |
| 15.91147 | 13.42344 |
| 15.91983 | 13.45748 |
| 15.93127 | 13.48573 |
| 15.93929 | 13.51548 |
| 15.94686 | 13.54778 |
| 15.9553  | 13.57919 |
| 15.96315 | 13.6086  |
| 15.9722  | 13.63577 |
| 15.98201 | 13.66134 |
| 15.99082 | 13.68813 |
| 15.99714 | 13.71753 |
| 16.00603 | 13.74733 |
| 16.01618 | 13.77497 |
| 16.02387 | 13.79997 |
| 16.032   | 13.8284  |
| 16.04005 | 13.85857 |
| 16.04466 | 13.89134 |
| 16.04947 | 13.9283  |
| 16.05486 | 13.95777 |
| 16.06553 | 13.98683 |
| 16.07578 | 14.01292 |
| 16.08393 | 14.04035 |
| 16.09266 | 14.07021 |
| 16.10005 | 14.09887 |
| 16.11012 | 14.12503 |
| 16.11697 | 14.15017 |
| 16.12075 | 14.17886 |
| 16.12581 | 14.20952 |
| 16.1326  | 14.23631 |
| 16.14985 | 14.26091 |
| 16.16921 | 14.28719 |
| 16.18092 | 14.31318 |
| 16.19222 | 14.33209 |
| 16.20792 | 14.35571 |
| 16.22096 | 14.38512 |
| 16.2298  | 14.41708 |
| 16.24076 | 14.4453  |
| 16.25125 | 14.47202 |
| 16.26355 | 14.5024  |
| 16.27462 | 14.52867 |
| 16.28411 | 14.55365 |
| 16.29405 | 14.58107 |
| 16.30322 | 14.6095  |
| 16.31334 | 14.63777 |
| 16.3236  | 14.66749 |
| 16.33496 | 14.69781 |
| 16.34792 | 14.72464 |
| 16.3612  | 14.74997 |
| 16.37257 | 14.77575 |
| 16.38261 | 14.80345 |
| 16.39381 | 14.83039 |
| 16.40709 | 14.85542 |
| 16.41959 | 14.88011 |

|          |          |
|----------|----------|
| 16.43238 | 14.90607 |
| 16.44198 | 14.93157 |
| 16.45008 | 14.95773 |
| 16.45007 | 14.98635 |
| 16.45477 | 15.00802 |
| 16.46665 | 15.02604 |
| 16.47458 | 15.04801 |
| 16.48142 | 15.06669 |
| 16.48759 | 15.08499 |
| 16.49383 | 15.1038  |
| 16.50324 | 15.12291 |
| 16.50887 | 15.14324 |
| 16.51146 | 15.1607  |
| 16.51686 | 15.17753 |
| 16.52157 | 15.1963  |
| 16.52688 | 15.21493 |
| 16.53437 | 15.23087 |
| 16.54261 | 15.24671 |
| 16.55081 | 15.26251 |
| 16.56153 | 15.27817 |
| 16.57233 | 15.29613 |
| 16.57956 | 15.31424 |
| 16.58469 | 15.33234 |
| 16.59935 | 15.35165 |
| 16.61401 | 15.36724 |
| 16.62483 | 15.38081 |
| 16.635   | 15.39475 |
| 16.6415  | 15.41175 |
| 16.64561 | 15.42884 |
| 16.64732 | 15.44244 |
| 16.65412 | 15.4576  |
| 16.65778 | 15.46842 |
| 16.65986 | 15.48283 |
| 16.66235 | 15.50466 |
| 16.66727 | 15.5181  |
| 16.67226 | 15.52773 |
| 16.67728 | 15.53988 |
| 16.68217 | 15.55763 |
| 16.68579 | 15.57337 |
| 16.6911  | 15.58878 |
| 16.69669 | 15.6038  |
| 16.70215 | 15.61194 |
| 16.70956 | 15.62525 |
| 16.71815 | 15.64687 |
| 16.72587 | 15.66333 |
| 16.74594 | 15.68121 |
| 16.76482 | 15.69193 |
| 16.77122 | 15.70192 |
| 16.78089 | 15.72005 |
| 16.79024 | 15.74005 |
| 16.7989  | 15.75993 |
| 16.80661 | 15.77675 |
| 16.81268 | 15.79571 |
| 16.82024 | 15.81563 |

|          |          |
|----------|----------|
| 16.82083 | 15.83091 |
| 16.82129 | 15.84577 |
| 16.82578 | 15.86128 |
| 16.83144 | 15.87674 |
| 16.83861 | 15.89156 |
| 16.84546 | 15.90762 |
| 16.84982 | 15.92308 |
| 16.85538 | 15.93565 |
| 16.86078 | 15.94778 |
| 16.86809 | 15.96259 |
| 16.87557 | 15.97846 |
| 16.88091 | 15.99266 |
| 16.8858  | 16.00499 |
| 16.89242 | 16.01841 |
| 16.90186 | 16.03418 |
| 16.91099 | 16.05116 |
| 16.91918 | 16.06602 |
| 16.92756 | 16.08786 |
| 16.93403 | 16.10339 |
| 16.94145 | 16.11723 |
| 16.94747 | 16.13062 |
| 16.95299 | 16.14446 |
| 16.96619 | 16.15717 |
| 16.97789 | 16.17068 |
| 16.98099 | 16.18068 |
| 16.98392 | 16.19248 |
| 16.98927 | 16.20611 |
| 16.99695 | 16.21874 |
| 17.00752 | 16.23285 |
| 17.01508 | 16.24881 |
| 17.02193 | 16.26371 |
| 17.03118 | 16.27926 |
| 17.03948 | 16.29698 |
| 17.04709 | 16.31361 |
| 17.05383 | 16.32975 |
| 17.06039 | 16.34379 |
| 17.06949 | 16.35325 |
| 17.07941 | 16.36305 |
| 17.09158 | 16.37476 |
| 17.10172 | 16.38742 |
| 17.11185 | 16.40082 |
| 17.12236 | 16.41377 |
| 17.13917 | 16.42784 |
| 17.16175 | 16.44234 |
| 17.17438 | 16.45827 |
| 17.19002 | 16.47221 |
| 17.20513 | 16.48219 |
| 17.21592 | 16.49084 |
| 17.22647 | 16.50003 |
| 17.23618 | 16.50863 |
| 17.24481 | 16.51633 |
| 17.25325 | 16.52766 |
| 17.25574 | 16.53618 |
| 17.25653 | 16.54654 |



|           |           |
|-----------|-----------|
| 17. 26846 | 16. 55744 |
| 17. 28597 | 16. 5635  |
| 17. 29981 | 16. 56944 |
| 17. 31231 | 16. 5774  |
| 17. 32319 | 16. 58898 |
| 17. 3332  | 16. 60133 |
| 17. 34488 | 16. 61393 |
| 17. 35482 | 16. 62444 |
| 17. 36574 | 16. 63495 |
| 17. 37685 | 16. 64466 |
| 17. 38996 | 16. 65082 |
| 17. 4028  | 16. 6601  |
| 17. 41349 | 16. 66925 |
| 17. 41926 | 16. 68088 |
| 17. 43286 | 16. 69111 |
| 17. 44658 | 16. 69808 |
| 17. 4568  | 16. 70323 |
| 17. 46466 | 16. 70643 |
| 17. 47256 | 16. 71134 |
| 17. 48309 | 16. 7175  |
| 17. 49416 | 16. 72854 |
| 17. 50477 | 16. 7389  |
| 17. 51263 | 16. 74115 |
| 17. 52214 | 16. 74417 |
| 17. 5299  | 16. 75753 |
| 17. 53774 | 16. 76577 |
| 17. 54614 | 16. 77286 |
| 17. 55558 | 16. 78576 |
| 17. 56669 | 16. 79827 |
| 17. 57772 | 16. 81488 |
| 17. 58588 | 16. 83051 |
| 17. 59316 | 16. 8419  |
| 17. 60324 | 16. 85362 |
| 17. 61223 | 16. 86546 |
| 17. 62113 | 16. 87711 |
| 17. 63072 | 16. 88805 |
| 17. 64134 | 16. 89863 |
| 17. 6513  | 16. 91185 |
| 17. 66073 | 16. 92444 |
| 17. 67163 | 16. 9367  |
| 17. 68744 | 16. 94765 |
| 17. 70385 | 16. 95881 |
| 17. 71769 | 16. 97215 |
| 17. 72675 | 16. 98485 |
| 17. 73561 | 16. 99949 |
| 17. 74647 | 17. 01341 |
| 17. 75691 | 17. 0246  |
| 17. 76962 | 17. 039   |
|           | 17. 05305 |
|           | 17. 06355 |
|           | 17. 07399 |
|           | 17. 08565 |
|           | 17. 09952 |
|           | 17. 11231 |

17. 12826  
17. 14532  
17. 15881  
17. 17374  
17. 18567  
17. 19893  
17. 21174  
17. 22505  
17. 24074  
17. 25478  
17. 26929  
17. 28275  
17. 29569  
17. 30658  
17. 31822  
17. 33394  
17. 34827  
17. 36036  
17. 37464  
17. 38796  
17. 39886  
17. 41137  
17. 42479  
17. 43826  
17. 45164  
17. 46346  
17. 47784  
17. 49206  
17. 5045  
17. 51808  
17. 53095

on

| 10      | 15      |
|---------|---------|
| CO2P    | CO2P    |
| 0.00375 | 0.00343 |
| 0.00371 | 0.00397 |
| 0.00344 | 0.00355 |
| 0.00341 | 0.00394 |
| 0.00321 | 0.0038  |
| 0.00341 | 0.00349 |
| 0.00362 | 0.00343 |
| 0.00388 | 0.00394 |
| 0.00315 | 0.00327 |
| 0.00392 | 0.0035  |
| 0.00307 | 0.0033  |
| 0.00298 | 0.0038  |
| 0.00341 | 0.00375 |
| 0.00345 | 0.00389 |
| 0.0048  | 0.00355 |
| 0.00291 | 0.00411 |
| 0.00277 | 0.00458 |
| 0.00246 | 0.00414 |
| 0.00308 | 0.0038  |
| 0.00294 | 0.00323 |
| 0.00337 | 0.00294 |
| 0.0029  | 0.00333 |
| 0.00277 | 0.00333 |
| 0.00328 | 0.00313 |
| 0.00318 | 0.00329 |
| 0.00458 | 0.00294 |
| 0.00322 | 0.00298 |
| 0.00337 | 0.00299 |
| 0.00312 | 0.003   |
| 0.00349 | 0.00283 |
| 0.00275 | 0.00317 |
| 0.00349 | 0.00262 |
| 0.00312 | 0.00283 |
| 0.00362 | 0.00521 |
| 0.00357 | 0.00294 |
| 0.00333 | 0.00347 |
| 0.00387 | 0.00337 |
| 0.00398 | 0.00339 |
| 0.00398 | 0.00347 |
| 0.00408 | 0.0031  |
| 0.00399 | 0.00304 |
| 0.00324 | 0.00266 |
| 0.00326 | 0.0035  |
| 0.00344 | 0.00302 |
| 0.00383 | 0.00329 |
| 0.00351 | 0.00325 |
| 0.00343 | 0.00302 |
| 0.0037  | 0.00347 |
| 0.00287 | 0.00278 |
| 0.00286 | 0.00321 |
| 0.003   | 0.00248 |

|         |         |
|---------|---------|
| 0.00317 | 0.00339 |
| 0.00268 | 0.00344 |
| 0.00333 | 0.00415 |
| 0.00335 | 0.00266 |
| 0.00326 | 0.00295 |
| 0.00259 | 0.00322 |
| 0.00316 | 0.00321 |
| 0.003   | 0.00259 |
| 0.0032  | 0.00319 |
| 0.00309 | 0.00293 |
| 0.00306 | 0.0028  |
| 0.00315 | 0.00336 |
| 0.00451 | 0.00296 |
| 0.00337 | 0.00278 |
| 0.00295 | 0.00342 |
| 0.00261 | 0.00322 |
| 0.00329 | 0.00348 |
| 0.00292 | 0.004   |
| 0.00318 | 0.00331 |
| 0.00467 | 0.00344 |
| 0.0028  | 0.00362 |
| 0.00292 | 0.004   |
| 0.0033  | 0.00364 |
| 0.00333 | 0.00381 |
| 0.00306 | 0.00364 |
| 0.00279 | 0.00404 |
| 0.00305 | 0.00425 |
| 0.00423 | 0.00351 |
| 0.00316 | 0.00416 |
| 0.00273 | 0.00325 |
| 0.00311 | 0.00394 |
| 0.00278 | 0.00358 |
| 0.00318 | 0.00381 |
| 0.00265 | 0.00358 |
| 0.00284 | 0.00345 |
| 0.00266 | 0.00377 |
| 0.0033  | 0.00274 |
| 0.00354 | 0.00429 |
| 0.00387 | 0.00407 |
| 0.00361 | 0.00361 |
| 0.00397 | 0.00426 |
| 0.00363 | 0.00339 |
| 0.00537 | 0.00702 |
| 0.00324 | 0.00344 |
| 0.00347 | 0.00352 |
| 0.00341 | 0.00322 |
| 0.00349 | 0.00384 |
| 0.00321 | 0.00324 |
| 0.00351 | 0.00362 |
| 0.00366 | 0.00379 |
| 0.00377 | 0.00305 |
| 0.0027  | 0.00328 |
| 0.00337 | 0.00329 |
| 0.00275 | 0.00368 |

|         |         |
|---------|---------|
| 0.0033  | 0.0034  |
| 0.00287 | 0.00367 |
| 0.00302 | 0.00348 |
| 0.00261 | 0.00373 |
| 0.00272 | 0.00378 |
| 0.00329 | 0.00344 |
| 0.00342 | 0.0032  |
| 0.0028  | 0.00303 |
| 0.00269 | 0.00312 |
| 0.00301 | 0.00302 |
| 0.00301 | 0.00292 |
| 0.00247 | 0.00275 |
| 0.00323 | 0.00252 |
| 0.00338 | 0.00314 |
| 0.00288 | 0.00299 |
| 0.00277 | 0.0032  |
| 0.0029  | 0.00252 |
| 0.00309 | 0.00332 |
| 0.00295 | 0.00295 |
| 0.00364 | 0.00333 |
| 0.00324 | 0.00267 |
| 0.00365 | 0.00279 |
| 0.00391 | 0.00253 |
| 0.00351 | 0.00252 |
| 0.00367 | 0.00265 |
| 0.00352 | 0.00295 |
| 0.00377 | 0.00346 |
| 0.00344 | 0.00288 |
| 0.0029  | 0.00341 |
| 0.00317 | 0.00315 |
| 0.00292 | 0.0031  |
| 0.00303 | 0.0031  |
| 0.00275 | 0.0025  |
| 0.00299 | 0.00313 |
| 0.00283 | 0.00381 |
| 0.00301 | 0.00324 |
| 0.00316 | 0.00578 |
| 0.00249 | 0.00342 |
| 0.00312 | 0.00398 |
| 0.003   | 0.00359 |
| 0.00333 | 0.00623 |
| 0.00417 | 0.00355 |
| 0.00411 | 0.00347 |
| 0.01753 | 0.00594 |
| 0.01848 | 0.00342 |
| 0.01776 | 0.00415 |
| 0.01898 | 0.00408 |
| 0.01883 | 0.00382 |
| 0.01918 | 0.00371 |
| 0.01882 | 0.00326 |
| 0.01888 | 0.00339 |
| 0.019   | 0.00343 |
| 0.01966 | 0.0033  |
| 0.01999 | 0.00328 |

|         |         |
|---------|---------|
| 0.01981 | 0.0034  |
| 0.02057 | 0.00303 |
| 0.02025 | 0.00305 |
| 0.02013 | 0.00231 |
| 0.02012 | 0.00323 |
| 0.01973 | 0.00351 |
| 0.01857 | 0.00325 |
| 0.02009 | 0.00353 |
| 0.02027 | 0.00344 |
| 0.02046 | 0.00352 |
| 0.02044 | 0.0034  |
| 0.02058 | 0.00254 |
| 0.01988 | 0.00346 |
| 0.01975 | 0.00382 |
| 0.0198  | 0.00386 |
| 0.02005 | 0.00377 |
| 0.02067 | 0.00533 |
| 0.02078 | 0.0033  |
| 0.02055 | 0.00462 |
| 0.01956 | 0.00334 |
| 0.02007 | 0.00309 |
| 0.01895 | 0.00373 |
| 0.01921 | 0.00303 |
| 0.01971 | 0.00442 |
| 0.01929 | 0.00387 |
| 0.0198  | 0.00319 |
| 0.01902 | 0.00346 |
| 0.01922 | 0.00317 |
| 0.0198  | 0.00292 |
| 0.01882 | 0.00382 |
| 0.01782 | 0.00394 |
| 0.01833 | 0.00352 |
| 0.01811 | 0.00346 |
| 0.01784 | 0.00337 |
| 0.01795 | 0.00599 |
| 0.01698 | 0.00299 |
| 0.01762 | 0.00325 |
| 0.01757 | 0.00331 |
| 0.0176  | 0.00335 |
| 0.01458 | 0.00334 |
| 0.01663 | 0.00326 |
| 0.01661 | 0.003   |
| 0.01634 | 0.00358 |
| 0.01676 | 0.00344 |
| 0.01547 | 0.00364 |
| 0.01553 | 0.00297 |
| 0.01483 | 0.00362 |
| 0.01523 | 0.00374 |
| 0.01444 | 0.00409 |
| 0.01409 | 0.00326 |
| 0.01464 | 0.00332 |
| 0.01409 | 0.00305 |
| 0.01413 | 0.00354 |
| 0.01357 | 0.00385 |

|         |         |
|---------|---------|
| 0.01302 | 0.00397 |
| 0.01444 | 0.00299 |
| 0.01331 | 0.00387 |
| 0.0133  | 0.00315 |
| 0.01352 | 0.00305 |
| 0.01259 | 0.00322 |
| 0.01278 | 0.00284 |
| 0.01292 | 0.00522 |
| 0.01156 | 0.00863 |
| 0.01269 | 0.00958 |
| 0.01143 | 0.00838 |
| 0.01272 | 0.00857 |
| 0.0109  | 0.00747 |
| 0.01259 | 0.00638 |
| 0.01216 | 0.00761 |
| 0.01183 | 0.00799 |
| 0.01146 | 0.0072  |
| 0.01053 | 0.00791 |
| 0.01115 | 0.00822 |
| 0.01129 | 0.00773 |
| 0.01085 | 0.00795 |
| 0.01043 | 0.00877 |
| 0.01089 | 0.00966 |
| 0.0105  | 0.00921 |
| 0.01134 | 0.01006 |
| 0.01007 | 0.01024 |
| 0.00948 | 0.00941 |
| 0.0103  | 0.0108  |
| 0.0096  | 0.0107  |
| 0.00922 | 0.01081 |
| 0.00942 | 0.01133 |
| 0.00899 | 0.01154 |
| 0.01127 | 0.01214 |
| 0.0087  | 0.01231 |
| 0.00943 | 0.01268 |
| 0.00842 | 0.01275 |
| 0.01005 | 0.01253 |
| 0.00998 | 0.01225 |
| 0.00707 | 0.0115  |
| 0.00846 | 0.01203 |
| 0.00911 | 0.01247 |
| 0.00839 | 0.01292 |
| 0.00886 | 0.01249 |
| 0.00772 | 0.01251 |
| 0.00798 | 0.01245 |
| 0.00851 | 0.0123  |
| 0.00848 | 0.01246 |
| 0.00868 | 0.01253 |
| 0.0086  | 0.01181 |
| 0.00835 | 0.01266 |
| 0.00798 | 0.01278 |
| 0.00737 | 0.01289 |
| 0.00759 | 0.01368 |
| 0.0076  | 0.01287 |

|         |         |
|---------|---------|
| 0.00767 | 0.01269 |
| 0.00736 | 0.01314 |
| 0.0076  | 0.0127  |
| 0.00716 | 0.01281 |
| 0.00689 | 0.0131  |
| 0.00704 | 0.01296 |
| 0.00651 | 0.01281 |
| 0.00663 | 0.01307 |
| 0.00699 | 0.01303 |
| 0.00844 | 0.01287 |
| 0.00813 | 0.0127  |
| 0.00695 | 0.0124  |
| 0.00695 | 0.01259 |
| 0.00679 | 0.01243 |
| 0.00691 | 0.01243 |
| 0.00694 | 0.01272 |
| 0.00727 | 0.01116 |
| 0.0076  | 0.01127 |
| 0.00764 | 0.01104 |
| 0.00724 | 0.011   |
| 0.00677 | 0.01168 |
| 0.00815 | 0.01079 |
| 0.00686 | 0.01105 |
| 0.00674 | 0.01069 |
| 0.00674 | 0.01073 |
| 0.0073  | 0.01019 |
| 0.00747 | 0.01016 |
| 0.00696 | 0.01037 |
| 0.00785 | 0.00992 |
| 0.00705 | 0.01031 |
| 0.0068  | 0.01029 |
| 0.00677 | 0.01081 |
| 0.00706 | 0.01014 |
| 0.00626 | 0.01042 |
| 0.00673 | 0.0106  |
| 0.00728 | 0.01019 |
| 0.00727 | 0.01015 |
| 0.00617 | 0.01075 |
| 0.00614 | 0.01052 |
| 0.00672 | 0.01041 |
| 0.00649 | 0.01103 |
| 0.00713 | 0.01032 |
| 0.00668 | 0.01001 |
| 0.00695 | 0.00962 |
| 0.00668 | 0.00925 |
| 0.00668 | 0.00874 |
| 0.00648 | 0.00939 |
| 0.00644 | 0.00968 |
| 0.00607 | 0.00963 |
| 0.00605 | 0.00982 |
| 0.00686 | 0.00919 |
| 0.00595 | 0.00876 |
| 0.00628 | 0.00857 |
| 0.00567 | 0.00884 |



|         |         |
|---------|---------|
| 0.00702 | 0.00921 |
| 0.00731 | 0.00889 |
| 0.00479 | 0.00935 |
| 0.00468 | 0.00908 |
| 0.00562 | 0.00889 |
| 0.00483 | 0.00887 |
| 0.0055  | 0.00872 |
| 0.0047  | 0.00852 |
| 0.00452 | 0.00843 |
| 0.00437 | 0.00869 |
| 0.00407 | 0.00881 |
| 0.00378 | 0.00916 |
| 0.00445 | 0.00862 |
| 0.0038  | 0.008   |
| 0.00422 | 0.00868 |
| 0.00456 | 0.00799 |
| 0.00428 | 0.00812 |
| 0.00398 | 0.00871 |
| 0.00375 | 0.00867 |
| 0.00362 | 0.00796 |
| 0.00401 | 0.00874 |
| 0.00356 | 0.00885 |
| 0.00317 | 0.00792 |
| 0.00351 | 0.01008 |
| 0.00381 | 0.00825 |
| 0.00372 | 0.00878 |
| 0.00372 | 0.00921 |
| 0.00324 | 0.00844 |
| 0.00361 | 0.00911 |
| 0.00351 | 0.00936 |
| 0.00333 | 0.0092  |
| 0.00322 | 0.0088  |
| 0.00329 | 0.0084  |
| 0.00353 | 0.00924 |
| 0.00345 | 0.00944 |
| 0.00261 | 0.00938 |
| 0.00311 | 0.00874 |
| 0.00319 | 0.00897 |
| 0.00285 | 0.00835 |
| 0.0026  | 0.00853 |
| 0.00307 | 0.00853 |
| 0.00306 | 0.00961 |
| 0.00272 | 0.00881 |
| 0.00329 | 0.00896 |
| 0.00267 | 0.00904 |
| 0.00273 | 0.00897 |
| 0.003   | 0.01238 |
| 0.00312 | 0.00869 |
| 0.00291 | 0.00864 |
| 0.00299 | 0.00888 |
| 0.0037  | 0.00845 |
| 0.00345 | 0.00924 |
| 0.0033  | 0.00889 |
| 0.00289 | 0.00938 |

|         |         |
|---------|---------|
| 0.00298 | 0.00926 |
| 0.00285 | 0.00893 |
| 0.00348 | 0.00848 |
| 0.00617 | 0.00912 |
| 0.00318 | 0.00891 |
| 0.00367 | 0.00943 |
| 0.00353 | 0.00925 |
| 0.00243 | 0.00973 |
| 0.00349 | 0.01168 |
| 0.00446 | 0.0091  |
| 0.00485 | 0.0085  |
| 0.0029  | 0.00855 |
| 0.00343 | 0.00876 |
| 0.00357 | 0.00933 |
| 0.00396 | 0.00829 |
| 0.00337 | 0.00935 |
| 0.00363 | 0.00905 |
| 0.00293 | 0.00899 |
| 0.00317 | 0.00821 |
| 0.00369 | 0.0083  |
| 0.0027  | 0.00852 |
| 0.00319 | 0.00849 |
| 0.00341 | 0.00854 |
| 0.00276 | 0.01032 |
| 0.00305 | 0.00883 |
| 0.00255 | 0.00827 |
| 0.00252 | 0.0075  |
| 0.00298 | 0.00821 |
| 0.00271 | 0.00803 |
| 0.00306 | 0.00841 |
| 0.00333 | 0.00792 |
| 0.00335 | 0.0072  |
| 0.00301 | 0.00844 |
| 0.00351 | 0.00847 |
| 0.00368 | 0.0078  |
| 0.00328 | 0.00841 |
| 0.00298 | 0.00779 |
| 0.0034  | 0.00743 |
| 0.00355 | 0.0077  |
| 0.00299 | 0.0072  |
| 0.00353 | 0.00831 |
| 0.00388 | 0.0084  |
| 0.004   | 0.00784 |
| 0.00397 | 0.00809 |
| 0.00347 | 0.00763 |
| 0.00371 | 0.00751 |
| 0.00316 | 0.00798 |
| 0.00295 | 0.00758 |
| 0.00326 | 0.00739 |
| 0.00368 | 0.00686 |
| 0.00356 | 0.00714 |
| 0.00332 | 0.0072  |
| 0.00363 | 0.00657 |
| 0.0036  | 0.00695 |

|         |         |
|---------|---------|
| 0.00366 | 0.00661 |
| 0.00458 | 0.00721 |
| 0.00298 | 0.00685 |
| 0.00357 | 0.00699 |
| 0.00401 | 0.0073  |
| 0.00369 | 0.00723 |
| 0.0032  | 0.00721 |
| 0.00326 | 0.00812 |
| 0.00322 | 0.00695 |
| 0.00386 | 0.00659 |
| 0.00321 | 0.00702 |
| 0.00323 | 0.00723 |
| 0.00323 | 0.0075  |
| 0.00332 | 0.00696 |
| 0.00279 | 0.00717 |
| 0.00272 | 0.0061  |
| 0.00281 | 0.00614 |
| 0.00295 | 0.00647 |
| 0.00303 | 0.00626 |
| 0.00342 | 0.00616 |
| 0.00376 | 0.00631 |
| 0.00319 | 0.00672 |
| 0.003   | 0.00506 |
| 0.00318 | 0.0054  |
| 0.00346 | 0.0057  |
| 0.00357 | 0.00583 |
| 0.00414 | 0.00593 |
| 0.00381 | 0.0061  |
| 0.00395 | 0.0064  |
| 0.00339 | 0.00679 |
| 0.00404 | 0.00615 |
| 0.00365 | 0.0106  |
| 0.00374 | 0.00737 |
| 0.0033  | 0.00574 |
| 0.00259 | 0.00612 |
| 0.00292 | 0.00608 |
| 0.00317 | 0.00755 |
| 0.0035  | 0.00592 |
| 0.00338 | 0.00611 |
| 0.00274 | 0.00581 |
| 0.00331 | 0.00615 |
| 0.00287 | 0.00559 |
| 0.00369 | 0.00562 |
| 0.00354 | 0.00621 |
| 0.00303 | 0.00546 |
| 0.00319 | 0.00571 |
| 0.0032  | 0.00557 |
| 0.00298 | 0.00567 |
| 0.00301 | 0.00514 |
| 0.00309 | 0.00488 |
| 0.00335 | 0.00526 |
| 0.00268 | 0.00594 |
| 0.00293 | 0.00536 |
| 0.00297 | 0.00538 |

|         |         |
|---------|---------|
| 0.00257 | 0.0049  |
| 0.00302 | 0.00477 |
| 0.00339 | 0.00512 |
| 0.00313 | 0.00535 |
| 0.00307 | 0.00507 |
| 0.00283 | 0.00526 |
| 0.00319 | 0.00454 |
| 0.00329 | 0.00533 |
| 0.00318 | 0.00573 |
| 0.00387 | 0.00558 |
| 0.00327 | 0.00529 |
| 0.00286 | 0.00519 |
| 0.00373 | 0.00555 |
| 0.00355 | 0.0053  |
| 0.0033  | 0.00536 |
| 0.00396 | 0.00548 |
| 0.00352 | 0.00558 |
| 0.00362 | 0.00454 |
| 0.00492 | 0.00512 |
| 0.00352 | 0.00475 |
| 0.00351 | 0.00473 |
| 0.00367 | 0.00399 |
| 0.004   | 0.00465 |
| 0.00338 | 0.00414 |
| 0.00349 | 0.0049  |
| 0.00452 | 0.00492 |
| 0.00373 | 0.00393 |
| 0.00308 | 0.00406 |
| 0.00318 | 0.0043  |
| 0.00366 | 0.00415 |
| 0.00298 | 0.00375 |
| 0.00318 | 0.00444 |
| 0.00306 | 0.00421 |
| 0.0032  | 0.00361 |
| 0.00305 | 0.00438 |
| 0.00301 | 0.00911 |
| 0.00291 | 0.00473 |
| 0.00244 | 0.00449 |
| 0.00463 | 0.00475 |
| 0.00287 | 0.00471 |
| 0.00254 | 0.00451 |
| 0.00288 | 0.00512 |
| 0.00324 | 0.00465 |
| 0.00331 | 0.00472 |
| 0.00303 | 0.00423 |
| 0.00293 | 0.00415 |
| 0.00319 | 0.00387 |
| 0.00343 | 0.00433 |
| 0.00372 | 0.00387 |
| 0.00359 | 0.00486 |
| 0.00344 | 0.00405 |
| 0.00346 | 0.00462 |
| 0.0027  | 0.00402 |
| 0.0034  | 0.0039  |

|         |         |
|---------|---------|
| 0.00393 | 0.00398 |
| 0.00364 | 0.00414 |
| 0.00324 | 0.00398 |
| 0.00356 | 0.00466 |
| 0.00306 | 0.00414 |
| 0.00334 | 0.00459 |
| 0.00301 | 0.00441 |
| 0.00407 | 0.00421 |
| 0.00363 | 0.00398 |
| 0.00322 | 0.00392 |
| 0.00285 | 0.00392 |
| 0.00309 | 0.00413 |
| 0.00289 | 0.00401 |
| 0.00281 | 0.00583 |
| 0.00356 | 0.00387 |
| 0.00296 | 0.00335 |
| 0.0027  | 0.00469 |
| 0.00265 | 0.00375 |
| 0.00307 | 0.00343 |
| 0.00302 | 0.00378 |
| 0.0032  | 0.00367 |
| 0.00468 | 0.00363 |
| 0.00286 | 0.00335 |
| 0.00364 | 0.00397 |
| 0.00328 | 0.00377 |
| 0.00382 | 0.00318 |
| 0.00349 | 0.00531 |
| 0.00307 | 0.00427 |
| 0.0035  | 0.00427 |
| 0.00338 | 0.0037  |
| 0.00297 | 0.00278 |
| 0.00359 | 0.00337 |
| 0.00342 | 0.00304 |
| 0.00374 | 0.00345 |
| 0.00338 | 0.00336 |
| 0.00346 | 0.00381 |
| 0.00393 | 0.00341 |
| 0.00339 | 0.00257 |
| 0.00378 | 0.00299 |
| 0.00293 | 0.003   |
| 0.00479 | 0.0036  |
| 0.00342 | 0.00243 |
| 0.00323 | 0.00368 |
| 0.00314 | 0.00326 |
| 0.00244 | 0.00337 |
| 0.00315 | 0.00418 |
| 0.00266 | 0.00356 |
| 0.0031  | 0.00335 |
| 0.00332 | 0.00351 |
| 0.00316 | 0.00345 |
| 0.00333 | 0.0031  |
| 0.00298 | 0.00311 |
| 0.00265 | 0.00347 |
| 0.0038  | 0.00365 |

|         |         |
|---------|---------|
| 0.00302 | 0.00345 |
| 0.00323 | 0.00289 |
| 0.00361 | 0.00338 |
| 0.00362 | 0.00377 |
| 0.00375 | 0.00279 |
| 0.00344 | 0.00289 |
| 0.00414 | 0.00299 |
| 0.00309 | 0.00289 |
| 0.00359 | 0.00295 |
| 0.00377 | 0.00313 |
| 0.00318 | 0.0027  |
| 0.00343 | 0.00297 |
| 0.00393 | 0.00287 |
| 0.0027  | 0.00411 |
| 0.00368 | 0.00462 |
| 0.00264 | 0.00353 |
| 0.00321 | 0.00364 |
| 0.00392 | 0.00298 |
| 0.00371 | 0.00394 |
| 0.00338 | 0.00392 |
| 0.00309 | 0.00259 |
| 0.00289 | 0.00293 |
| 0.00316 | 0.00374 |
| 0.00273 | 0.00353 |
| 0.00345 | 0.00323 |
| 0.0026  | 0.00379 |
| 0.00275 | 0.00367 |
| 0.00259 | 0.00343 |
| 0.00338 | 0.00356 |
| 0.00256 | 0.00371 |
| 0.0034  | 0.00332 |
| 0.00329 | 0.00284 |
| 0.00284 | 0.00294 |
| 0.00311 | 0.00303 |
| 0.00328 | 0.00315 |
| 0.00309 | 0.00314 |
| 0.00243 | 0.0032  |
| 0.00316 | 0.00262 |
| 0.00278 | 0.00376 |
| 0.00264 | 0.00274 |
| 0.00305 | 0.00297 |
| 0.0026  | 0.00239 |
| 0.00292 | 0.00335 |
| 0.00326 | 0.00309 |
| 0.00289 | 0.00247 |
| 0.00316 | 0.00289 |
| 0.00279 | 0.00314 |
| 0.00373 | 0.00309 |
|         | 0.00304 |
|         | 0.00319 |
|         | 0.00325 |
|         | 0.00337 |
|         | 0.00359 |
|         | 0.00276 |

0.00302  
0.00311  
0.00333  
0.00286  
0.00284  
0.00313  
0.00331  
0.00255  
0.00454  
0.00383  
0.00346  
0.00341  
0.00327  
0.00407  
0.00352  
0.00306  
0.00309  
0.0032  
0.00338  
0.00314  
0.00337  
0.00261  
0.00361  
0.00326  
0.00266  
0.00314  
0.00304  
0.00292  
0.00272  
0.00278  
0.0028
