# Supplementary material for: Enhanced Thermal Insulation and Flame-Retardant Properties of Polyvinyl Alcohol-Based Aerogels Composited with Ammonium Polyphosphate and Chitosan
Source: Hindawi journal article supplement (doi:10.1155/2021/5555916), 2021-05-28
Supplement: f1 [file 5555916.f1.zip]

| 0        |         | 5        |         | 10       |         | 15       |         |
|----------|---------|----------|---------|----------|---------|----------|---------|
| strain   | stress  | strain   | stress  | strain   | stress  | strain   | stress  |
| 0        | 0.00192 | 0        | 0.00163 | 0        | 0.00218 | 0        | 0.00163 |
| 5.20E-04 | 0.00173 | 4.40E-04 | 0.00173 | 4.40E-04 | 0.00218 | 4.40E-04 | 0.00163 |
| 7.30E-04 | 0.00155 | 6.10E-04 | 0.00173 | 6.10E-04 | 0.00228 | 6.10E-04 | 0.00209 |
| 9.10E-04 | 0.00164 | 7.70E-04 | 0.00155 | 7.60E-04 | 0.00246 | 7.60E-04 | 0.00228 |
| 0.00107  | 0.002   | 9.00E-04 | 0.00191 | 8.90E-04 | 0.00246 | 8.90E-04 | 0.00191 |
| 0.00121  | 0.00237 | 0.00102  | 0.002   | 0.00102  | 0.00264 | 0.00102  | 0.00255 |
| 0.00135  | 0.00237 | 0.00113  | 0.00191 | 0.00113  | 0.00291 | 0.00113  | 0.00255 |
| 0.00148  | 0.00218 | 0.00124  | 0.00191 | 0.00123  | 0.00301 | 0.00123  | 0.00255 |
| 0.0016   | 0.00237 | 0.00134  | 0.00182 | 0.00134  | 0.00282 | 0.00134  | 0.00237 |
| 0.00172  | 0.00218 | 0.00145  | 0.002   | 0.00144  | 0.00282 | 0.00144  | 0.00228 |
| 0.00184  | 0.00228 | 0.00154  | 0.00218 | 0.00153  | 0.00282 | 0.00153  | 0.00273 |
| 0.00196  | 0.00218 | 0.00164  | 0.00218 | 0.00163  | 0.00301 | 0.00163  | 0.00291 |
| 0.00207  | 0.00209 | 0.00173  | 0.00246 | 0.00172  | 0.00319 | 0.00172  | 0.003   |
| 0.00218  | 0.00228 | 0.00183  | 0.00218 | 0.00182  | 0.0031  | 0.00182  | 0.00328 |
| 0.00229  | 0.00228 | 0.00192  | 0.00209 | 0.00192  | 0.00345 | 0.00192  | 0.00364 |
| 0.00241  | 0.00218 | 0.00201  | 0.00218 | 0.002    | 0.00319 | 0.00201  | 0.00319 |
| 0.00252  | 0.00228 | 0.00211  | 0.00237 | 0.0021   | 0.00319 | 0.0021   | 0.00319 |
| 0.00263  | 0.00228 | 0.0022   | 0.00218 | 0.00219  | 0.00364 | 0.0022   | 0.00383 |
| 0.00274  | 0.00237 | 0.00229  | 0.00237 | 0.00228  | 0.00364 | 0.00228  | 0.00364 |
| 0.00285  | 0.002   | 0.00239  | 0.00237 | 0.00238  | 0.00364 | 0.00238  | 0.00337 |
| 0.00296  | 0.00246 | 0.00248  | 0.00255 | 0.00247  | 0.00355 | 0.00247  | 0.00337 |
| 0.00308  | 0.00273 | 0.00257  | 0.00237 | 0.00256  | 0.00355 | 0.00256  | 0.00373 |
| 0.00318  | 0.00228 | 0.00267  | 0.00228 | 0.00265  | 0.00364 | 0.00266  | 0.004   |
| 0.0033   | 0.00228 | 0.00276  | 0.00246 | 0.00275  | 0.00364 | 0.00275  | 0.00391 |
| 0.0034   | 0.00246 | 0.00285  | 0.00228 | 0.00284  | 0.00391 | 0.00284  | 0.00346 |
| 0.00352  | 0.00273 | 0.00295  | 0.00228 | 0.00293  | 0.00355 | 0.00294  | 0.00346 |
| 0.00363  | 0.00255 | 0.00303  | 0.00246 | 0.00303  | 0.00364 | 0.00303  | 0.00346 |
| 0.00374  | 0.00273 | 0.00313  | 0.00209 | 0.00312  | 0.00382 | 0.00312  | 0.00337 |
| 0.00385  | 0.00273 | 0.00322  | 0.00191 | 0.00321  | 0.00355 | 0.00321  | 0.00337 |
| 0.00396  | 0.00237 | 0.00331  | 0.00228 | 0.00331  | 0.00373 | 0.00331  | 0.0031  |
| 0.00408  | 0.00282 | 0.0034   | 0.00218 | 0.0034   | 0.004   | 0.0034   | 0.00328 |
| 0.00418  | 0.00282 | 0.0035   | 0.00246 | 0.00349  | 0.0041  | 0.00349  | 0.00383 |
| 0.0043   | 0.00301 | 0.00359  | 0.00237 | 0.00358  | 0.00418 | 0.00359  | 0.00437 |
| 0.00441  | 0.00282 | 0.00368  | 0.00237 | 0.00368  | 0.00436 | 0.00368  | 0.0041  |
| 0.00452  | 0.00291 | 0.00378  | 0.00246 | 0.00377  | 0.00436 | 0.00377  | 0.00383 |
| 0.00463  | 0.00291 | 0.00387  | 0.00246 | 0.00386  | 0.00455 | 0.00386  | 0.00428 |
| 0.00474  | 0.00291 | 0.00396  | 0.00282 | 0.00396  | 0.00491 | 0.00396  | 0.00455 |
| 0.00485  | 0.00328 | 0.00405  | 0.00264 | 0.00404  | 0.00473 | 0.00405  | 0.00464 |
| 0.00497  | 0.00328 | 0.00415  | 0.00264 | 0.00414  | 0.00446 | 0.00414  | 0.00455 |
| 0.00507  | 0.0031  | 0.00424  | 0.00255 | 0.00423  | 0.00473 | 0.00423  | 0.00464 |
| 0.00519  | 0.00282 | 0.00433  | 0.00273 | 0.00432  | 0.00473 | 0.00432  | 0.00446 |
| 0.0053   | 0.00319 | 0.00443  | 0.00264 | 0.00441  | 0.00483 | 0.00442  | 0.00491 |
| 0.00541  | 0.00328 | 0.00452  | 0.00264 | 0.00451  | 0.00509 | 0.00451  | 0.00509 |
| 0.00552  | 0.00319 | 0.00461  | 0.00282 | 0.0046   | 0.00501 | 0.0046   | 0.00501 |
| 0.00563  | 0.00328 | 0.0047   | 0.00273 | 0.00469  | 0.00491 | 0.0047   | 0.00501 |
| 0.00574  | 0.00365 | 0.00479  | 0.00273 | 0.00479  | 0.00501 | 0.00479  | 0.00509 |
| 0.00585  | 0.00346 | 0.00489  | 0.00291 | 0.00488  | 0.00519 | 0.00488  | 0.00537 |
| 0.00597  | 0.00337 | 0.00498  | 0.00273 | 0.00497  | 0.00537 | 0.00497  | 0.00546 |
| 0.00607  | 0.00373 | 0.00507  | 0.00291 | 0.00507  | 0.00537 | 0.00507  | 0.00537 |
| 0.00619  | 0.00355 | 0.00516  | 0.00282 | 0.00515  | 0.00509 | 0.00516  | 0.00537 |
| 0.00629  | 0.00337 | 0.00526  | 0.00264 | 0.00525  | 0.00509 | 0.00525  | 0.00564 |
| 0.00641  | 0.00337 | 0.00535  | 0.00282 | 0.00534  | 0.00537 | 0.00535  | 0.00582 |

|         |         |         |         |         |         |         |         |
|---------|---------|---------|---------|---------|---------|---------|---------|
| 0.00652 | 0.00337 | 0.00544 | 0.00291 | 0.00543 | 0.00564 | 0.00543 | 0.00564 |
| 0.00663 | 0.00346 | 0.00554 | 0.00273 | 0.00552 | 0.00528 | 0.00553 | 0.00509 |
| 0.00674 | 0.00373 | 0.00563 | 0.00273 | 0.00562 | 0.00564 | 0.00562 | 0.00537 |
| 0.00685 | 0.00383 | 0.00572 | 0.00301 | 0.00571 | 0.00555 | 0.00571 | 0.00582 |
| 0.00696 | 0.00383 | 0.00581 | 0.00291 | 0.0058  | 0.00555 | 0.00581 | 0.00619 |
| 0.00708 | 0.00373 | 0.00591 | 0.00291 | 0.0059  | 0.00592 | 0.0059  | 0.0061  |
| 0.00719 | 0.00373 | 0.006   | 0.00328 | 0.00599 | 0.00546 | 0.00599 | 0.006   |
| 0.0073  | 0.00373 | 0.00609 | 0.0031  | 0.00608 | 0.00555 | 0.00608 | 0.0061  |
| 0.00741 | 0.00383 | 0.00619 | 0.0031  | 0.00617 | 0.00574 | 0.00618 | 0.00628 |
| 0.00752 | 0.00383 | 0.00628 | 0.0031  | 0.00627 | 0.0061  | 0.00627 | 0.00646 |
| 0.00763 | 0.00355 | 0.00637 | 0.00282 | 0.00636 | 0.00592 | 0.00636 | 0.00619 |
| 0.00774 | 0.00383 | 0.00646 | 0.00282 | 0.00645 | 0.006   | 0.00646 | 0.0061  |
| 0.00785 | 0.00383 | 0.00655 | 0.0031  | 0.00655 | 0.0061  | 0.00655 | 0.006   |
| 0.00796 | 0.00391 | 0.00665 | 0.00319 | 0.00664 | 0.006   | 0.00664 | 0.00619 |
| 0.00808 | 0.00383 | 0.00674 | 0.00328 | 0.00673 | 0.0061  | 0.00673 | 0.00637 |
| 0.00818 | 0.00365 | 0.00683 | 0.00301 | 0.00683 | 0.0061  | 0.00683 | 0.00655 |
| 0.0083  | 0.00391 | 0.00692 | 0.0031  | 0.00691 | 0.006   | 0.00692 | 0.00701 |
| 0.0084  | 0.0041  | 0.00702 | 0.00291 | 0.00701 | 0.00628 | 0.00701 | 0.00719 |
| 0.00852 | 0.0041  | 0.00711 | 0.0031  | 0.0071  | 0.00646 | 0.00711 | 0.0071  |
| 0.00863 | 0.00437 | 0.0072  | 0.00328 | 0.0072  | 0.00646 | 0.0072  | 0.00665 |
| 0.00874 | 0.00446 | 0.0073  | 0.00337 | 0.00728 | 0.00665 | 0.00729 | 0.00673 |
| 0.00885 | 0.00437 | 0.00739 | 0.00364 | 0.00738 | 0.00682 | 0.00738 | 0.00692 |
| 0.00896 | 0.00446 | 0.00748 | 0.00373 | 0.00747 | 0.0071  | 0.00747 | 0.00728 |
| 0.00908 | 0.00446 | 0.00757 | 0.00364 | 0.00756 | 0.00692 | 0.00757 | 0.0071  |
| 0.00918 | 0.00464 | 0.00767 | 0.00346 | 0.00766 | 0.00692 | 0.00766 | 0.00682 |
| 0.0093  | 0.00473 | 0.00776 | 0.00364 | 0.00775 | 0.00728 | 0.00775 | 0.00728 |
| 0.0094  | 0.00491 | 0.00785 | 0.00383 | 0.00784 | 0.0071  | 0.00784 | 0.00692 |
| 0.00952 | 0.00473 | 0.00795 | 0.00391 | 0.00794 | 0.00701 | 0.00794 | 0.00655 |
| 0.00963 | 0.00473 | 0.00803 | 0.00355 | 0.00803 | 0.0071  | 0.00803 | 0.00673 |
| 0.00974 | 0.00483 | 0.00813 | 0.00355 | 0.00812 | 0.00701 | 0.00812 | 0.00673 |
| 0.00985 | 0.00464 | 0.00822 | 0.00373 | 0.00821 | 0.00719 | 0.00822 | 0.00682 |
| 0.00996 | 0.00473 | 0.00831 | 0.00373 | 0.00831 | 0.00701 | 0.00831 | 0.00701 |
| 0.01007 | 0.0051  | 0.00841 | 0.00355 | 0.0084  | 0.00737 | 0.0084  | 0.00701 |
| 0.01019 | 0.0051  | 0.0085  | 0.00364 | 0.00849 | 0.00737 | 0.00849 | 0.00728 |
| 0.0103  | 0.00519 | 0.00859 | 0.00364 | 0.00859 | 0.00719 | 0.00858 | 0.0071  |
| 0.01041 | 0.0051  | 0.00868 | 0.0041  | 0.00867 | 0.00728 | 0.00868 | 0.00692 |
| 0.01052 | 0.00528 | 0.00878 | 0.00391 | 0.00877 | 0.00764 | 0.00877 | 0.0071  |
| 0.01063 | 0.00501 | 0.00886 | 0.00373 | 0.00886 | 0.00747 | 0.00886 | 0.00746 |
| 0.01074 | 0.00528 | 0.00896 | 0.00383 | 0.00895 | 0.00764 | 0.00895 | 0.00756 |
| 0.01085 | 0.00519 | 0.00906 | 0.00391 | 0.00904 | 0.00801 | 0.00905 | 0.00728 |
| 0.01097 | 0.00528 | 0.00915 | 0.00383 | 0.00914 | 0.00792 | 0.00914 | 0.00773 |
| 0.01107 | 0.00537 | 0.00924 | 0.00373 | 0.00923 | 0.00773 | 0.00923 | 0.00756 |
| 0.01119 | 0.00537 | 0.00933 | 0.00383 | 0.00932 | 0.00773 | 0.00933 | 0.00773 |
| 0.01129 | 0.0051  | 0.00943 | 0.00383 | 0.00942 | 0.00801 | 0.00942 | 0.00801 |
| 0.01141 | 0.00546 | 0.00951 | 0.00383 | 0.00951 | 0.00801 | 0.00951 | 0.00764 |
| 0.01151 | 0.00546 | 0.00961 | 0.004   | 0.0096  | 0.00792 | 0.0096  | 0.00783 |
| 0.01163 | 0.00555 | 0.00971 | 0.00373 | 0.00969 | 0.0081  | 0.0097  | 0.00828 |
| 0.01174 | 0.00564 | 0.00979 | 0.00373 | 0.00979 | 0.00819 | 0.00979 | 0.00828 |
| 0.01185 | 0.00564 | 0.00989 | 0.00391 | 0.00988 | 0.00801 | 0.00988 | 0.00828 |
| 0.01196 | 0.00555 | 0.00998 | 0.00391 | 0.00997 | 0.00837 | 0.00998 | 0.00864 |
| 0.01207 | 0.00555 | 0.01007 | 0.00383 | 0.01006 | 0.00847 | 0.01006 | 0.00874 |
| 0.01219 | 0.00555 | 0.01017 | 0.004   | 0.01015 | 0.00828 | 0.01016 | 0.00864 |
| 0.0123  | 0.00564 | 0.01026 | 0.004   | 0.01025 | 0.00864 | 0.01025 | 0.00892 |
| 0.01241 | 0.00555 | 0.01035 | 0.0041  | 0.01034 | 0.00864 | 0.01034 | 0.00855 |

|         |         |         |         |         |         |         |         |
|---------|---------|---------|---------|---------|---------|---------|---------|
| 0.01252 | 0.00574 | 0.01044 | 0.0041  | 0.01043 | 0.00847 | 0.01044 | 0.00864 |
| 0.01263 | 0.00582 | 0.01054 | 0.00428 | 0.01053 | 0.00864 | 0.01053 | 0.00929 |
| 0.01274 | 0.00582 | 0.01063 | 0.0041  | 0.01062 | 0.00864 | 0.01063 | 0.00901 |
| 0.01285 | 0.00592 | 0.01072 | 0.00391 | 0.01071 | 0.00855 | 0.01071 | 0.00929 |
| 0.01296 | 0.00592 | 0.01082 | 0.004   | 0.0108  | 0.00883 | 0.01081 | 0.00929 |
| 0.01308 | 0.00592 | 0.01091 | 0.0041  | 0.0109  | 0.00892 | 0.0109  | 0.00938 |
| 0.01318 | 0.0061  | 0.011   | 0.0041  | 0.01099 | 0.0091  | 0.01099 | 0.00955 |
| 0.0133  | 0.00619 | 0.01109 | 0.00428 | 0.01108 | 0.00901 | 0.01108 | 0.00974 |
| 0.0134  | 0.0061  | 0.01119 | 0.00428 | 0.01118 | 0.0091  | 0.01118 | 0.00965 |
| 0.01352 | 0.00601 | 0.01128 | 0.00428 | 0.01127 | 0.00928 | 0.01127 | 0.00955 |
| 0.01363 | 0.00601 | 0.01137 | 0.00437 | 0.01136 | 0.00928 | 0.01136 | 0.00992 |
| 0.01374 | 0.00637 | 0.01146 | 0.00455 | 0.01145 | 0.00919 | 0.01146 | 0.00983 |
| 0.01385 | 0.00619 | 0.01155 | 0.00446 | 0.01154 | 0.00928 | 0.01154 | 0.00974 |
| 0.01396 | 0.00592 | 0.01165 | 0.00428 | 0.01164 | 0.00946 | 0.01164 | 0.0102  |
| 0.01408 | 0.00628 | 0.01174 | 0.00418 | 0.01173 | 0.00974 | 0.01174 | 0.00992 |
| 0.01418 | 0.00601 | 0.01183 | 0.00428 | 0.01182 | 0.00965 | 0.01182 | 0.01001 |
| 0.0143  | 0.00637 | 0.01193 | 0.00418 | 0.01191 | 0.00983 | 0.01192 | 0.0102  |
| 0.01441 | 0.00673 | 0.01202 | 0.00437 | 0.01201 | 0.01001 | 0.01201 | 0.00992 |
| 0.01452 | 0.00673 | 0.01211 | 0.00428 | 0.01211 | 0.00992 | 0.01211 | 0.00983 |
| 0.01463 | 0.00701 | 0.0122  | 0.00418 | 0.01219 | 0.0101  | 0.0122  | 0.01037 |
| 0.01474 | 0.00665 | 0.0123  | 0.0041  | 0.01229 | 0.01029 | 0.01229 | 0.01046 |
| 0.01485 | 0.00673 | 0.01238 | 0.00428 | 0.01238 | 0.0101  | 0.01238 | 0.01056 |
| 0.01496 | 0.00692 | 0.01248 | 0.00428 | 0.01247 | 0.0101  | 0.01247 | 0.01092 |
| 0.01507 | 0.0071  | 0.01258 | 0.00437 | 0.01256 | 0.01001 | 0.01257 | 0.01092 |
| 0.01519 | 0.00701 | 0.01266 | 0.00418 | 0.01266 | 0.01001 | 0.01266 | 0.01128 |
| 0.0153  | 0.00692 | 0.01276 | 0.00418 | 0.01275 | 0.01019 | 0.01275 | 0.0112  |
| 0.01541 | 0.00728 | 0.01285 | 0.00464 | 0.01284 | 0.01056 | 0.01285 | 0.01111 |
| 0.01552 | 0.0071  | 0.01294 | 0.00464 | 0.01294 | 0.01065 | 0.01294 | 0.01128 |
| 0.01563 | 0.00738 | 0.01303 | 0.00464 | 0.01302 | 0.01065 | 0.01303 | 0.01137 |
| 0.01574 | 0.00728 | 0.01313 | 0.00446 | 0.01312 | 0.01065 | 0.01312 | 0.01146 |
| 0.01585 | 0.00701 | 0.01322 | 0.00446 | 0.01321 | 0.01083 | 0.01322 | 0.01174 |
| 0.01597 | 0.0071  | 0.01331 | 0.00473 | 0.01331 | 0.01065 | 0.01331 | 0.01146 |
| 0.01607 | 0.00728 | 0.01341 | 0.00464 | 0.0134  | 0.01083 | 0.0134  | 0.01174 |
| 0.01619 | 0.00747 | 0.0135  | 0.00464 | 0.01349 | 0.01083 | 0.01349 | 0.01193 |
| 0.01629 | 0.00756 | 0.01359 | 0.00473 | 0.01359 | 0.01074 | 0.01359 | 0.01201 |
| 0.01641 | 0.00756 | 0.01369 | 0.00491 | 0.01367 | 0.01083 | 0.01368 | 0.01211 |
| 0.01652 | 0.00738 | 0.01377 | 0.00464 | 0.01377 | 0.01128 | 0.01377 | 0.01219 |
| 0.01663 | 0.00756 | 0.01387 | 0.00491 | 0.01387 | 0.01128 | 0.01386 | 0.01256 |
| 0.01674 | 0.00783 | 0.01396 | 0.00509 | 0.01395 | 0.01128 | 0.01395 | 0.01228 |
| 0.01685 | 0.00764 | 0.01405 | 0.00483 | 0.01405 | 0.01092 | 0.01405 | 0.01256 |
| 0.01696 | 0.00756 | 0.01414 | 0.00483 | 0.01414 | 0.01092 | 0.01414 | 0.01302 |
| 0.01707 | 0.00764 | 0.01424 | 0.00483 | 0.01423 | 0.01101 | 0.01423 | 0.01319 |
| 0.01719 | 0.00764 | 0.01433 | 0.00491 | 0.01432 | 0.01128 | 0.01433 | 0.0131  |
| 0.0173  | 0.00764 | 0.01442 | 0.00473 | 0.01442 | 0.01146 | 0.01442 | 0.01356 |
| 0.01741 | 0.00801 | 0.01452 | 0.00473 | 0.01451 | 0.01156 | 0.01451 | 0.01328 |
| 0.01752 | 0.00756 | 0.01461 | 0.00509 | 0.0146  | 0.01165 | 0.0146  | 0.01338 |
| 0.01763 | 0.00756 | 0.0147  | 0.00509 | 0.0147  | 0.01174 | 0.0147  | 0.01356 |
| 0.01774 | 0.00783 | 0.0148  | 0.00483 | 0.01479 | 0.01201 | 0.01479 | 0.01365 |
| 0.01785 | 0.00774 | 0.01489 | 0.00473 | 0.01488 | 0.01174 | 0.01488 | 0.01374 |
| 0.01796 | 0.00783 | 0.01498 | 0.00483 | 0.01497 | 0.01201 | 0.01498 | 0.01402 |
| 0.01808 | 0.00783 | 0.01507 | 0.00519 | 0.01506 | 0.01219 | 0.01506 | 0.01392 |
| 0.01818 | 0.0081  | 0.01517 | 0.00537 | 0.01516 | 0.01211 | 0.01516 | 0.01447 |
| 0.0183  | 0.0081  | 0.01526 | 0.00509 | 0.01525 | 0.01201 | 0.01525 | 0.01474 |
| 0.0184  | 0.0081  | 0.01535 | 0.00509 | 0.01534 | 0.01256 | 0.01534 | 0.01438 |

|         |         |         |         |         |         |         |         |
|---------|---------|---------|---------|---------|---------|---------|---------|
| 0.01852 | 0.00819 | 0.01545 | 0.00528 | 0.01543 | 0.01238 | 0.01544 | 0.01474 |
| 0.01863 | 0.00828 | 0.01553 | 0.00528 | 0.01553 | 0.01265 | 0.01553 | 0.01466 |
| 0.01874 | 0.00801 | 0.01563 | 0.00555 | 0.01562 | 0.01256 | 0.01562 | 0.01501 |
| 0.01885 | 0.00819 | 0.01572 | 0.00546 | 0.01571 | 0.01238 | 0.01571 | 0.01493 |
| 0.01896 | 0.00838 | 0.01581 | 0.00546 | 0.01581 | 0.01238 | 0.01581 | 0.01511 |
| 0.01908 | 0.00847 | 0.0159  | 0.00537 | 0.0159  | 0.01274 | 0.0159  | 0.01565 |
| 0.01918 | 0.00838 | 0.016   | 0.00509 | 0.01599 | 0.01274 | 0.01599 | 0.01593 |
| 0.0193  | 0.00828 | 0.01609 | 0.00537 | 0.01608 | 0.01283 | 0.01609 | 0.01565 |
| 0.01941 | 0.00847 | 0.01618 | 0.00519 | 0.01618 | 0.01302 | 0.01617 | 0.01493 |
| 0.01952 | 0.00847 | 0.01628 | 0.00491 | 0.01626 | 0.01283 | 0.01627 | 0.01547 |
| 0.01963 | 0.00874 | 0.01637 | 0.00501 | 0.01636 | 0.01283 | 0.01636 | 0.01574 |
| 0.01974 | 0.00874 | 0.01646 | 0.00528 | 0.01646 | 0.01302 | 0.01646 | 0.01565 |
| 0.01985 | 0.00864 | 0.01655 | 0.00537 | 0.01654 | 0.01319 | 0.01655 | 0.01593 |
| 0.01996 | 0.00874 | 0.01665 | 0.00546 | 0.01664 | 0.01319 | 0.01664 | 0.01611 |
| 0.02007 | 0.0091  | 0.01674 | 0.00546 | 0.01673 | 0.01347 | 0.01674 | 0.01556 |
| 0.02019 | 0.00874 | 0.01683 | 0.00537 | 0.01682 | 0.01365 | 0.01682 | 0.0162  |
| 0.0203  | 0.00883 | 0.01693 | 0.00528 | 0.01691 | 0.01392 | 0.01692 | 0.0162  |
| 0.02041 | 0.0091  | 0.01702 | 0.00537 | 0.01701 | 0.01429 | 0.01701 | 0.01602 |
| 0.02052 | 0.00892 | 0.01711 | 0.00537 | 0.0171  | 0.0142  | 0.0171  | 0.01611 |
| 0.02063 | 0.00883 | 0.0172  | 0.00564 | 0.01719 | 0.0142  | 0.0172  | 0.01665 |
| 0.02075 | 0.0091  | 0.0173  | 0.00555 | 0.01729 | 0.01456 | 0.01729 | 0.01647 |
| 0.02085 | 0.0091  | 0.01739 | 0.00537 | 0.01738 | 0.01429 | 0.01738 | 0.01674 |
| 0.02097 | 0.00929 | 0.01748 | 0.00546 | 0.01747 | 0.01456 | 0.01747 | 0.01702 |
| 0.02107 | 0.00929 | 0.01757 | 0.00564 | 0.01757 | 0.01474 | 0.01757 | 0.01657 |
| 0.02119 | 0.00919 | 0.01766 | 0.00574 | 0.01766 | 0.01484 | 0.01766 | 0.01693 |
| 0.02129 | 0.00929 | 0.01776 | 0.00546 | 0.01775 | 0.01456 | 0.01775 | 0.0172  |
| 0.02141 | 0.00947 | 0.01785 | 0.00555 | 0.01784 | 0.01493 | 0.01785 | 0.01729 |
| 0.02152 | 0.00965 | 0.01794 | 0.00574 | 0.01794 | 0.01511 | 0.01794 | 0.01747 |
| 0.02163 | 0.00974 | 0.01804 | 0.006   | 0.01802 | 0.01511 | 0.01803 | 0.01784 |
| 0.02174 | 0.00983 | 0.01813 | 0.00582 | 0.01812 | 0.01511 | 0.01812 | 0.01775 |
| 0.02185 | 0.00974 | 0.01822 | 0.00564 | 0.01821 | 0.01502 | 0.01821 | 0.01802 |
| 0.02196 | 0.00965 | 0.01831 | 0.00592 | 0.0183  | 0.01511 | 0.01831 | 0.01875 |
| 0.02207 | 0.00974 | 0.01841 | 0.00582 | 0.0184  | 0.01538 | 0.0184  | 0.01902 |
| 0.02219 | 0.0101  | 0.0185  | 0.00592 | 0.01849 | 0.01529 | 0.01849 | 0.01911 |
| 0.0223  | 0.00992 | 0.01859 | 0.006   | 0.01858 | 0.01538 | 0.01858 | 0.01856 |
| 0.02241 | 0.01001 | 0.01869 | 0.00592 | 0.01867 | 0.01565 | 0.01868 | 0.01856 |
| 0.02252 | 0.01001 | 0.01877 | 0.00564 | 0.01877 | 0.01547 | 0.01877 | 0.01884 |
| 0.02263 | 0.01001 | 0.01887 | 0.00555 | 0.01886 | 0.01547 | 0.01886 | 0.01984 |
| 0.02274 | 0.0101  | 0.01896 | 0.00574 | 0.01895 | 0.01565 | 0.01896 | 0.01948 |
| 0.02286 | 0.01001 | 0.01905 | 0.00574 | 0.01905 | 0.01574 | 0.01905 | 0.01984 |
| 0.02296 | 0.01001 | 0.01915 | 0.00564 | 0.01914 | 0.01611 | 0.01914 | 0.01993 |
| 0.02308 | 0.01029 | 0.01924 | 0.006   | 0.01923 | 0.0162  | 0.01923 | 0.01984 |
| 0.02318 | 0.01037 | 0.01933 | 0.00619 | 0.01933 | 0.01593 | 0.01933 | 0.02021 |
| 0.0233  | 0.01065 | 0.01942 | 0.00619 | 0.01942 | 0.01611 | 0.01942 | 0.02029 |
| 0.0234  | 0.01074 | 0.01952 | 0.0061  | 0.01951 | 0.01584 | 0.01951 | 0.02057 |
| 0.02352 | 0.01037 | 0.01961 | 0.00619 | 0.0196  | 0.01593 | 0.01961 | 0.02038 |
| 0.02363 | 0.01046 | 0.0197  | 0.00628 | 0.0197  | 0.01647 | 0.0197  | 0.02057 |
| 0.02374 | 0.01056 | 0.0198  | 0.00619 | 0.01978 | 0.01647 | 0.01979 | 0.02066 |
| 0.02385 | 0.01084 | 0.01989 | 0.00619 | 0.01988 | 0.01629 | 0.01988 | 0.02075 |
| 0.02396 | 0.01074 | 0.01998 | 0.00619 | 0.01998 | 0.01657 | 0.01998 | 0.02075 |
| 0.02408 | 0.01084 | 0.02007 | 0.0061  | 0.02006 | 0.01665 | 0.02007 | 0.02093 |
| 0.02418 | 0.01092 | 0.02017 | 0.006   | 0.02016 | 0.01639 | 0.02016 | 0.0213  |
| 0.0243  | 0.01084 | 0.02026 | 0.0061  | 0.02025 | 0.01647 | 0.02025 | 0.02139 |
| 0.02441 | 0.01084 | 0.02035 | 0.0061  | 0.02034 | 0.01702 | 0.02034 | 0.02184 |

|         |         |         |         |         |         |         |         |
|---------|---------|---------|---------|---------|---------|---------|---------|
| 0.02452 | 0.01092 | 0.02045 | 0.00592 | 0.02044 | 0.01693 | 0.02044 | 0.02175 |
| 0.02463 | 0.01084 | 0.02053 | 0.00592 | 0.02053 | 0.01702 | 0.02053 | 0.02184 |
| 0.02474 | 0.01102 | 0.02063 | 0.00628 | 0.02062 | 0.01702 | 0.02062 | 0.02203 |
| 0.02485 | 0.01147 | 0.02072 | 0.00619 | 0.02071 | 0.01693 | 0.02072 | 0.02211 |
| 0.02496 | 0.01156 | 0.02081 | 0.00637 | 0.02081 | 0.01693 | 0.02081 | 0.02194 |
| 0.02507 | 0.01156 | 0.02091 | 0.00619 | 0.02089 | 0.0172  | 0.0209  | 0.02194 |
| 0.02519 | 0.01147 | 0.021   | 0.00637 | 0.02099 | 0.01747 | 0.02099 | 0.02203 |
| 0.0253  | 0.01156 | 0.02109 | 0.00637 | 0.02108 | 0.01756 | 0.02108 | 0.02184 |
| 0.02541 | 0.01193 | 0.02118 | 0.00619 | 0.02117 | 0.01775 | 0.02117 | 0.02184 |
| 0.02552 | 0.01193 | 0.02128 | 0.00656 | 0.02127 | 0.01729 | 0.02127 | 0.02211 |
| 0.02563 | 0.01183 | 0.02137 | 0.00673 | 0.02136 | 0.01766 | 0.02136 | 0.02248 |
| 0.02574 | 0.01165 | 0.02146 | 0.00665 | 0.02145 | 0.01784 | 0.02145 | 0.0223  |
| 0.02585 | 0.01183 | 0.02156 | 0.00656 | 0.02154 | 0.01766 | 0.02155 | 0.0223  |
| 0.02597 | 0.01193 | 0.02165 | 0.00656 | 0.02164 | 0.01784 | 0.02164 | 0.0223  |
| 0.02607 | 0.01183 | 0.02174 | 0.00628 | 0.02173 | 0.01802 | 0.02173 | 0.02221 |
| 0.02619 | 0.01193 | 0.02183 | 0.00665 | 0.02182 | 0.01775 | 0.02183 | 0.02257 |
| 0.02629 | 0.01201 | 0.02193 | 0.00673 | 0.02192 | 0.01793 | 0.02192 | 0.02266 |
| 0.02641 | 0.01183 | 0.02202 | 0.0071  | 0.02201 | 0.01839 | 0.02201 | 0.02275 |
| 0.02652 | 0.01165 | 0.02211 | 0.00692 | 0.0221  | 0.01793 | 0.0221  | 0.02339 |
| 0.02663 | 0.01174 | 0.02221 | 0.00719 | 0.02219 | 0.0183  | 0.0222  | 0.02366 |
| 0.02674 | 0.01174 | 0.02229 | 0.00701 | 0.02229 | 0.01847 | 0.02229 | 0.02385 |
| 0.02685 | 0.01174 | 0.02239 | 0.00738 | 0.02238 | 0.01847 | 0.02238 | 0.02366 |
| 0.02696 | 0.01193 | 0.02248 | 0.00728 | 0.02247 | 0.01821 | 0.02248 | 0.0233  |
| 0.02707 | 0.01238 | 0.02257 | 0.00701 | 0.02256 | 0.01847 | 0.02256 | 0.02366 |
| 0.02719 | 0.01238 | 0.02267 | 0.00728 | 0.02266 | 0.01856 | 0.02266 | 0.02348 |
| 0.0273  | 0.01247 | 0.02276 | 0.00701 | 0.02275 | 0.01866 | 0.02275 | 0.02376 |
| 0.02741 | 0.01256 | 0.02285 | 0.00701 | 0.02284 | 0.01893 | 0.02285 | 0.02403 |
| 0.02752 | 0.01266 | 0.02294 | 0.00746 | 0.02293 | 0.01884 | 0.02294 | 0.02466 |
| 0.02763 | 0.01256 | 0.02304 | 0.00738 | 0.02303 | 0.01902 | 0.02303 | 0.02458 |
| 0.02774 | 0.01266 | 0.02313 | 0.00719 | 0.02312 | 0.01921 | 0.02313 | 0.02439 |
| 0.02785 | 0.01247 | 0.02322 | 0.00719 | 0.02321 | 0.01921 | 0.02321 | 0.02475 |
| 0.02796 | 0.01247 | 0.02332 | 0.0071  | 0.0233  | 0.01947 | 0.02331 | 0.02494 |
| 0.02808 | 0.01266 | 0.02341 | 0.00728 | 0.0234  | 0.01966 | 0.0234  | 0.02512 |
| 0.02818 | 0.01284 | 0.0235  | 0.00728 | 0.02349 | 0.01957 | 0.02349 | 0.02549 |
| 0.0283  | 0.01292 | 0.02359 | 0.00746 | 0.02358 | 0.01957 | 0.02359 | 0.02558 |
| 0.0284  | 0.0131  | 0.02369 | 0.00764 | 0.02368 | 0.01993 | 0.02368 | 0.02585 |
| 0.02852 | 0.01292 | 0.02377 | 0.00746 | 0.02377 | 0.01975 | 0.02377 | 0.02594 |
| 0.02863 | 0.01292 | 0.02387 | 0.00746 | 0.02386 | 0.02002 | 0.02386 | 0.02594 |
| 0.02874 | 0.0132  | 0.02396 | 0.00746 | 0.02395 | 0.01984 | 0.02396 | 0.02603 |
| 0.02885 | 0.01329 | 0.02405 | 0.00746 | 0.02404 | 0.01975 | 0.02404 | 0.02648 |
| 0.02896 | 0.01357 | 0.02415 | 0.00746 | 0.02414 | 0.01993 | 0.02414 | 0.02585 |
| 0.02908 | 0.01383 | 0.02424 | 0.00764 | 0.02423 | 0.02002 | 0.02424 | 0.0263  |
| 0.02918 | 0.01383 | 0.02433 | 0.00756 | 0.02433 | 0.01993 | 0.02433 | 0.02657 |
| 0.0293  | 0.01374 | 0.02443 | 0.00746 | 0.02441 | 0.02002 | 0.02442 | 0.02594 |
| 0.0294  | 0.01383 | 0.02452 | 0.00746 | 0.02451 | 0.02012 | 0.02451 | 0.02603 |
| 0.02952 | 0.0142  | 0.02461 | 0.00764 | 0.0246  | 0.02002 | 0.02461 | 0.02667 |
| 0.02963 | 0.01402 | 0.0247  | 0.00764 | 0.02469 | 0.02021 | 0.02469 | 0.02685 |
| 0.02974 | 0.01392 | 0.0248  | 0.00756 | 0.02479 | 0.02038 | 0.02479 | 0.02694 |
| 0.02985 | 0.01365 | 0.02488 | 0.00773 | 0.02488 | 0.02048 | 0.02488 | 0.02703 |
| 0.02996 | 0.0142  | 0.02498 | 0.00746 | 0.02497 | 0.02066 | 0.02497 | 0.02722 |
| 0.03007 | 0.01429 | 0.02508 | 0.00728 | 0.02506 | 0.02066 | 0.02507 | 0.0273  |
| 0.03019 | 0.01466 | 0.02516 | 0.00728 | 0.02516 | 0.02075 | 0.02516 | 0.02785 |
| 0.0303  | 0.01474 | 0.02526 | 0.00738 | 0.02525 | 0.02084 | 0.02525 | 0.02748 |
| 0.03041 | 0.01474 | 0.02535 | 0.00756 | 0.02534 | 0.02075 | 0.02535 | 0.02767 |

|         |         |         |         |         |         |         |         |
|---------|---------|---------|---------|---------|---------|---------|---------|
| 0.03052 | 0.01484 | 0.02544 | 0.00756 | 0.02544 | 0.02084 | 0.02544 | 0.02767 |
| 0.03063 | 0.01484 | 0.02554 | 0.00746 | 0.02553 | 0.02111 | 0.02553 | 0.02803 |
| 0.03075 | 0.01484 | 0.02563 | 0.00746 | 0.02562 | 0.0212  | 0.02562 | 0.02757 |
| 0.03085 | 0.01502 | 0.02572 | 0.00756 | 0.02571 | 0.02111 | 0.02572 | 0.0283  |
| 0.03097 | 0.01529 | 0.02581 | 0.00773 | 0.0258  | 0.02093 | 0.0258  | 0.02803 |
| 0.03107 | 0.0152  | 0.02591 | 0.00738 | 0.0259  | 0.02103 | 0.0259  | 0.02858 |
| 0.03119 | 0.01493 | 0.026   | 0.00738 | 0.02599 | 0.02111 | 0.026   | 0.02876 |
| 0.03129 | 0.01529 | 0.02609 | 0.00746 | 0.02608 | 0.02148 | 0.02608 | 0.02867 |
| 0.03141 | 0.01539 | 0.02619 | 0.00756 | 0.02617 | 0.02166 | 0.02618 | 0.0283  |
| 0.03152 | 0.01547 | 0.02627 | 0.00756 | 0.02627 | 0.02148 | 0.02627 | 0.02858 |
| 0.03163 | 0.01556 | 0.02637 | 0.00764 | 0.02636 | 0.02166 | 0.02636 | 0.02876 |
| 0.03174 | 0.01565 | 0.02646 | 0.00746 | 0.02645 | 0.02184 | 0.02645 | 0.02904 |
| 0.03185 | 0.01547 | 0.02655 | 0.00756 | 0.02655 | 0.02176 | 0.02655 | 0.02894 |
| 0.03196 | 0.01556 | 0.02665 | 0.00792 | 0.02664 | 0.02194 | 0.02664 | 0.02921 |
| 0.03207 | 0.01574 | 0.02674 | 0.00783 | 0.02673 | 0.02203 | 0.02673 | 0.0293  |
| 0.03219 | 0.01574 | 0.02684 | 0.00792 | 0.02682 | 0.02211 | 0.02683 | 0.02921 |
| 0.0323  | 0.01556 | 0.02692 | 0.00764 | 0.02692 | 0.02184 | 0.02692 | 0.02949 |
| 0.03241 | 0.01602 | 0.02702 | 0.00764 | 0.02701 | 0.02203 | 0.02701 | 0.02985 |
| 0.03252 | 0.01629 | 0.02711 | 0.00764 | 0.0271  | 0.02248 | 0.0271  | 0.03013 |
| 0.03263 | 0.0162  | 0.0272  | 0.00773 | 0.0272  | 0.02275 | 0.0272  | 0.03031 |
| 0.03274 | 0.01629 | 0.0273  | 0.00783 | 0.02729 | 0.02248 | 0.02729 | 0.03058 |
| 0.03286 | 0.01611 | 0.02739 | 0.0081  | 0.02738 | 0.02266 | 0.02738 | 0.03086 |
| 0.03296 | 0.01639 | 0.02748 | 0.00801 | 0.02747 | 0.02266 | 0.02747 | 0.03094 |
| 0.03308 | 0.01647 | 0.02757 | 0.00801 | 0.02757 | 0.02275 | 0.02757 | 0.03058 |
| 0.03318 | 0.01611 | 0.02767 | 0.00801 | 0.02766 | 0.02293 | 0.02766 | 0.03113 |
| 0.0333  | 0.0162  | 0.02775 | 0.00773 | 0.02775 | 0.02312 | 0.02775 | 0.03113 |
| 0.0334  | 0.01647 | 0.02785 | 0.00773 | 0.02784 | 0.02321 | 0.02784 | 0.03131 |
| 0.03352 | 0.01666 | 0.02795 | 0.00792 | 0.02793 | 0.02293 | 0.02794 | 0.03186 |
| 0.03363 | 0.01647 | 0.02803 | 0.0081  | 0.02803 | 0.02321 | 0.02803 | 0.03186 |
| 0.03374 | 0.01675 | 0.02813 | 0.00828 | 0.02812 | 0.0233  | 0.02812 | 0.0324  |
| 0.03385 | 0.01666 | 0.02822 | 0.00847 | 0.02821 | 0.02321 | 0.02821 | 0.03249 |
| 0.03396 | 0.01666 | 0.02832 | 0.00855 | 0.02831 | 0.0233  | 0.02831 | 0.0324  |
| 0.03408 | 0.01684 | 0.02841 | 0.00864 | 0.0284  | 0.02339 | 0.0284  | 0.03267 |
| 0.03418 | 0.01711 | 0.0285  | 0.00892 | 0.02849 | 0.02357 | 0.02849 | 0.03249 |
| 0.0343  | 0.01711 | 0.0286  | 0.00874 | 0.02858 | 0.02348 | 0.02859 | 0.0324  |
| 0.03441 | 0.01711 | 0.02868 | 0.00883 | 0.02868 | 0.02366 | 0.02867 | 0.03295 |
| 0.03452 | 0.01702 | 0.02878 | 0.00874 | 0.02877 | 0.02357 | 0.02877 | 0.03322 |
| 0.03463 | 0.01711 | 0.02887 | 0.00892 | 0.02886 | 0.02393 | 0.02886 | 0.0334  |
| 0.03474 | 0.01747 | 0.02896 | 0.00874 | 0.02895 | 0.02393 | 0.02895 | 0.03358 |
| 0.03485 | 0.01747 | 0.02906 | 0.00864 | 0.02905 | 0.02393 | 0.02905 | 0.03377 |
| 0.03497 | 0.01711 | 0.02915 | 0.00883 | 0.02914 | 0.02412 | 0.02914 | 0.03413 |
| 0.03507 | 0.01747 | 0.02924 | 0.00901 | 0.02923 | 0.02403 | 0.02923 | 0.03441 |
| 0.03519 | 0.01747 | 0.02933 | 0.00892 | 0.02932 | 0.02393 | 0.02932 | 0.03476 |
| 0.0353  | 0.01747 | 0.02943 | 0.00892 | 0.02942 | 0.02421 | 0.02942 | 0.03449 |
| 0.03541 | 0.01775 | 0.02952 | 0.00883 | 0.02951 | 0.02448 | 0.02951 | 0.03468 |
| 0.03552 | 0.01775 | 0.02961 | 0.00892 | 0.0296  | 0.02448 | 0.0296  | 0.03486 |
| 0.03563 | 0.01775 | 0.02971 | 0.00892 | 0.02969 | 0.02458 | 0.0297  | 0.03476 |
| 0.03575 | 0.01784 | 0.0298  | 0.00892 | 0.02979 | 0.02448 | 0.02979 | 0.03513 |
| 0.03585 | 0.01821 | 0.02989 | 0.00901 | 0.02988 | 0.02458 | 0.02988 | 0.03495 |
| 0.03597 | 0.01802 | 0.02998 | 0.00929 | 0.02997 | 0.02485 | 0.02997 | 0.03468 |
| 0.03607 | 0.0183  | 0.03007 | 0.0091  | 0.03007 | 0.02475 | 0.03007 | 0.03504 |
| 0.03619 | 0.01848 | 0.03016 | 0.00919 | 0.03016 | 0.02521 | 0.03016 | 0.0354  |
| 0.03629 | 0.01848 | 0.03026 | 0.00919 | 0.03025 | 0.02521 | 0.03025 | 0.03531 |
| 0.03641 | 0.01821 | 0.03035 | 0.00938 | 0.03034 | 0.02521 | 0.03035 | 0.03559 |

|         |         |         |         |         |         |         |         |
|---------|---------|---------|---------|---------|---------|---------|---------|
| 0.03652 | 0.0183  | 0.03044 | 0.00919 | 0.03044 | 0.0253  | 0.03044 | 0.03568 |
| 0.03663 | 0.01848 | 0.03054 | 0.00919 | 0.03052 | 0.02567 | 0.03053 | 0.03568 |
| 0.03674 | 0.01866 | 0.03063 | 0.00938 | 0.03062 | 0.02558 | 0.03062 | 0.03577 |
| 0.03685 | 0.01848 | 0.03072 | 0.00938 | 0.03072 | 0.02549 | 0.03072 | 0.03604 |
| 0.03696 | 0.01857 | 0.03081 | 0.00938 | 0.0308  | 0.02575 | 0.03081 | 0.03641 |
| 0.03708 | 0.01875 | 0.03091 | 0.00946 | 0.0309  | 0.02585 | 0.0309  | 0.03686 |
| 0.03719 | 0.01911 | 0.031   | 0.00955 | 0.03099 | 0.02567 | 0.03099 | 0.03695 |
| 0.0373  | 0.01893 | 0.03109 | 0.00965 | 0.03108 | 0.02612 | 0.03108 | 0.03695 |
| 0.03741 | 0.01893 | 0.03119 | 0.00946 | 0.03118 | 0.02603 | 0.03118 | 0.03631 |
| 0.03752 | 0.01929 | 0.03128 | 0.00929 | 0.03127 | 0.0264  | 0.03127 | 0.03677 |
| 0.03763 | 0.01911 | 0.03137 | 0.00965 | 0.03136 | 0.02667 | 0.03136 | 0.03695 |
| 0.03774 | 0.01921 | 0.03146 | 0.00974 | 0.03145 | 0.02648 | 0.03146 | 0.03714 |
| 0.03785 | 0.01966 | 0.03155 | 0.00955 | 0.03155 | 0.02612 | 0.03155 | 0.03796 |
| 0.03796 | 0.01966 | 0.03165 | 0.00965 | 0.03163 | 0.02612 | 0.03164 | 0.03777 |
| 0.03808 | 0.01957 | 0.03174 | 0.00983 | 0.03173 | 0.0264  | 0.03173 | 0.03822 |
| 0.03818 | 0.01975 | 0.03183 | 0.00983 | 0.03183 | 0.02648 | 0.03183 | 0.03841 |
| 0.0383  | 0.01984 | 0.03192 | 0.00992 | 0.03191 | 0.0264  | 0.03191 | 0.03822 |
| 0.0384  | 0.01966 | 0.03202 | 0.00955 | 0.03201 | 0.0264  | 0.03201 | 0.03813 |
| 0.03852 | 0.01994 | 0.03211 | 0.00955 | 0.0321  | 0.0264  | 0.03211 | 0.03859 |
| 0.03863 | 0.01966 | 0.0322  | 0.00974 | 0.03219 | 0.0263  | 0.03219 | 0.03878 |
| 0.03874 | 0.01975 | 0.0323  | 0.00983 | 0.03228 | 0.02648 | 0.03229 | 0.03887 |
| 0.03885 | 0.02002 | 0.03239 | 0.00992 | 0.03238 | 0.02657 | 0.03238 | 0.0396  |
| 0.03896 | 0.02021 | 0.03248 | 0.00983 | 0.03247 | 0.02657 | 0.03247 | 0.0395  |
| 0.03908 | 0.02039 | 0.03257 | 0.00983 | 0.03256 | 0.02667 | 0.03257 | 0.03968 |
| 0.03919 | 0.02039 | 0.03266 | 0.00992 | 0.03266 | 0.02685 | 0.03266 | 0.04032 |
| 0.0393  | 0.02039 | 0.03276 | 0.01001 | 0.03275 | 0.02703 | 0.03275 | 0.04023 |
| 0.03941 | 0.02021 | 0.03285 | 0.00992 | 0.03284 | 0.02685 | 0.03284 | 0.03995 |
| 0.03952 | 0.02021 | 0.03294 | 0.0101  | 0.03293 | 0.02722 | 0.03294 | 0.0405  |
| 0.03963 | 0.0203  | 0.03303 | 0.01029 | 0.03303 | 0.02748 | 0.03303 | 0.04068 |
| 0.03974 | 0.02057 | 0.03313 | 0.0101  | 0.03312 | 0.02758 | 0.03312 | 0.04105 |
| 0.03985 | 0.02076 | 0.03322 | 0.01029 | 0.03321 | 0.02758 | 0.03322 | 0.04114 |
| 0.03996 | 0.02076 | 0.03331 | 0.01029 | 0.03331 | 0.02776 | 0.03331 | 0.04105 |
| 0.04007 | 0.02084 | 0.03341 | 0.0101  | 0.03339 | 0.02776 | 0.0334  | 0.04105 |
| 0.04019 | 0.0213  | 0.0335  | 0.01029 | 0.03349 | 0.02785 | 0.03349 | 0.04142 |
| 0.0403  | 0.02103 | 0.03359 | 0.01046 | 0.03359 | 0.02776 | 0.03359 | 0.04105 |
| 0.04041 | 0.02121 | 0.03368 | 0.01037 | 0.03368 | 0.02794 | 0.03368 | 0.04169 |
| 0.04052 | 0.02139 | 0.03378 | 0.01029 | 0.03377 | 0.02794 | 0.03377 | 0.04223 |
| 0.04063 | 0.02148 | 0.03387 | 0.01037 | 0.03386 | 0.02803 | 0.03387 | 0.04223 |
| 0.04074 | 0.02148 | 0.03396 | 0.01046 | 0.03396 | 0.02776 | 0.03395 | 0.0425  |
| 0.04085 | 0.02157 | 0.03406 | 0.01029 | 0.03404 | 0.02785 | 0.03405 | 0.04314 |
| 0.04097 | 0.02166 | 0.03415 | 0.01029 | 0.03414 | 0.02803 | 0.03414 | 0.04259 |
| 0.04107 | 0.02194 | 0.03424 | 0.01056 | 0.03423 | 0.02803 | 0.03423 | 0.04268 |
| 0.04119 | 0.02203 | 0.03433 | 0.01074 | 0.03432 | 0.02785 | 0.03433 | 0.04314 |
| 0.04129 | 0.02212 | 0.03443 | 0.01065 | 0.03442 | 0.02822 | 0.03442 | 0.04333 |
| 0.04141 | 0.02203 | 0.03452 | 0.01065 | 0.03451 | 0.02822 | 0.03451 | 0.04323 |
| 0.04151 | 0.02221 | 0.03461 | 0.01056 | 0.0346  | 0.0284  | 0.0346  | 0.04387 |
| 0.04163 | 0.02212 | 0.03471 | 0.01046 | 0.0347  | 0.02858 | 0.0347  | 0.04396 |
| 0.04174 | 0.0223  | 0.03479 | 0.01065 | 0.03479 | 0.0284  | 0.03479 | 0.04387 |
| 0.04185 | 0.02212 | 0.03489 | 0.01074 | 0.03488 | 0.02822 | 0.03488 | 0.04387 |
| 0.04196 | 0.0223  | 0.03498 | 0.01074 | 0.03497 | 0.02876 | 0.03498 | 0.04396 |
| 0.04207 | 0.0223  | 0.03507 | 0.01065 | 0.03506 | 0.02867 | 0.03506 | 0.04432 |
| 0.04219 | 0.02266 | 0.03517 | 0.01092 | 0.03516 | 0.02858 | 0.03516 | 0.04469 |
| 0.0423  | 0.02293 | 0.03526 | 0.01092 | 0.03525 | 0.02876 | 0.03525 | 0.04432 |
| 0.04241 | 0.02275 | 0.03535 | 0.01092 | 0.03534 | 0.02885 | 0.03534 | 0.0446  |

|         |         |         |         |         |         |         |         |
|---------|---------|---------|---------|---------|---------|---------|---------|
| 0.04252 | 0.02275 | 0.03544 | 0.01092 | 0.03543 | 0.02904 | 0.03544 | 0.04505 |
| 0.04263 | 0.02293 | 0.03554 | 0.01092 | 0.03553 | 0.02931 | 0.03553 | 0.04487 |
| 0.04274 | 0.02321 | 0.03562 | 0.01092 | 0.03562 | 0.02913 | 0.03562 | 0.04524 |
| 0.04285 | 0.0233  | 0.03572 | 0.01102 | 0.03571 | 0.02921 | 0.03571 | 0.04597 |
| 0.04296 | 0.02321 | 0.03582 | 0.01111 | 0.0358  | 0.02949 | 0.03581 | 0.04569 |
| 0.04308 | 0.0233  | 0.0359  | 0.01102 | 0.0359  | 0.0294  | 0.0359  | 0.04597 |
| 0.04318 | 0.02366 | 0.036   | 0.01083 | 0.03599 | 0.0294  | 0.03599 | 0.04633 |
| 0.0433  | 0.02348 | 0.03609 | 0.01074 | 0.03608 | 0.02976 | 0.03609 | 0.04614 |
| 0.0434  | 0.02366 | 0.03619 | 0.01074 | 0.03618 | 0.02985 | 0.03618 | 0.04623 |
| 0.04352 | 0.02376 | 0.03628 | 0.01092 | 0.03627 | 0.02985 | 0.03627 | 0.04623 |
| 0.04363 | 0.02394 | 0.03637 | 0.01128 | 0.03636 | 0.03013 | 0.03636 | 0.04633 |
| 0.04374 | 0.02403 | 0.03646 | 0.01102 | 0.03645 | 0.02985 | 0.03646 | 0.04669 |
| 0.04385 | 0.02403 | 0.03655 | 0.0112  | 0.03655 | 0.02994 | 0.03655 | 0.04715 |
| 0.04396 | 0.02412 | 0.03665 | 0.01128 | 0.03664 | 0.02994 | 0.03664 | 0.04724 |
| 0.04408 | 0.02431 | 0.03674 | 0.01147 | 0.03673 | 0.03013 | 0.03674 | 0.04742 |
| 0.04418 | 0.02431 | 0.03683 | 0.01128 | 0.03683 | 0.03031 | 0.03683 | 0.04796 |
| 0.0443  | 0.02421 | 0.03693 | 0.01137 | 0.03691 | 0.0304  | 0.03692 | 0.04833 |
| 0.04441 | 0.02412 | 0.03702 | 0.01128 | 0.03701 | 0.03049 | 0.03701 | 0.04806 |
| 0.04452 | 0.0244  | 0.03711 | 0.01147 | 0.0371  | 0.03076 | 0.0371  | 0.04833 |
| 0.04463 | 0.02412 | 0.0372  | 0.01128 | 0.03719 | 0.03068 | 0.0372  | 0.04842 |
| 0.04474 | 0.02412 | 0.0373  | 0.01128 | 0.03729 | 0.03086 | 0.03729 | 0.0486  |
| 0.04485 | 0.02475 | 0.03738 | 0.0112  | 0.03738 | 0.03076 | 0.03738 | 0.04851 |
| 0.04496 | 0.02485 | 0.03748 | 0.01128 | 0.03747 | 0.03094 | 0.03747 | 0.04842 |
| 0.04507 | 0.02458 | 0.03757 | 0.01137 | 0.03756 | 0.03094 | 0.03757 | 0.04933 |
| 0.04519 | 0.02494 | 0.03766 | 0.01137 | 0.03766 | 0.03076 | 0.03766 | 0.0497  |
| 0.0453  | 0.02521 | 0.03776 | 0.01156 | 0.03775 | 0.03112 | 0.03775 | 0.04961 |
| 0.04541 | 0.0253  | 0.03785 | 0.01137 | 0.03784 | 0.03122 | 0.03785 | 0.04987 |
| 0.04552 | 0.02558 | 0.03794 | 0.01156 | 0.03794 | 0.03122 | 0.03794 | 0.05015 |
| 0.04563 | 0.0254  | 0.03804 | 0.01156 | 0.03802 | 0.0314  | 0.03803 | 0.05024 |
| 0.04574 | 0.02549 | 0.03813 | 0.01156 | 0.03812 | 0.03104 | 0.03812 | 0.05015 |
| 0.04585 | 0.0254  | 0.03822 | 0.01147 | 0.03821 | 0.03122 | 0.03822 | 0.05042 |
| 0.04597 | 0.02558 | 0.03831 | 0.01137 | 0.0383  | 0.03167 | 0.0383  | 0.05088 |
| 0.04607 | 0.02585 | 0.03841 | 0.01147 | 0.0384  | 0.03131 | 0.0384  | 0.05106 |
| 0.04619 | 0.02613 | 0.0385  | 0.01165 | 0.03849 | 0.03131 | 0.0385  | 0.05152 |
| 0.04629 | 0.02622 | 0.03859 | 0.01165 | 0.03858 | 0.03167 | 0.03858 | 0.05142 |
| 0.04641 | 0.0263  | 0.03869 | 0.01156 | 0.03867 | 0.03159 | 0.03868 | 0.05133 |
| 0.04652 | 0.02648 | 0.03878 | 0.01165 | 0.03877 | 0.03167 | 0.03877 | 0.05197 |
| 0.04663 | 0.02622 | 0.03887 | 0.01156 | 0.03887 | 0.03195 | 0.03886 | 0.05224 |
| 0.04674 | 0.0263  | 0.03896 | 0.01183 | 0.03895 | 0.03186 | 0.03896 | 0.05252 |
| 0.04685 | 0.02648 | 0.03906 | 0.01183 | 0.03905 | 0.03195 | 0.03905 | 0.05224 |
| 0.04696 | 0.0264  | 0.03914 | 0.01165 | 0.03914 | 0.03222 | 0.03914 | 0.05252 |
| 0.04707 | 0.02685 | 0.03924 | 0.01174 | 0.03923 | 0.03213 | 0.03923 | 0.05279 |
| 0.04719 | 0.02685 | 0.03934 | 0.01183 | 0.03932 | 0.03222 | 0.03933 | 0.05316 |
| 0.0473  | 0.02695 | 0.03942 | 0.01201 | 0.03942 | 0.03213 | 0.03942 | 0.05333 |
| 0.04741 | 0.02695 | 0.03952 | 0.01183 | 0.03951 | 0.03222 | 0.03951 | 0.05342 |
| 0.04752 | 0.0273  | 0.03961 | 0.01193 | 0.0396  | 0.03213 | 0.03961 | 0.05379 |
| 0.04763 | 0.0274  | 0.0397  | 0.01165 | 0.0397  | 0.0324  | 0.0397  | 0.05389 |
| 0.04774 | 0.0274  | 0.0398  | 0.01156 | 0.03979 | 0.03222 | 0.03979 | 0.05379 |
| 0.04785 | 0.02749 | 0.03989 | 0.01174 | 0.03988 | 0.03267 | 0.03988 | 0.05389 |
| 0.04796 | 0.02749 | 0.03998 | 0.01201 | 0.03997 | 0.03304 | 0.03997 | 0.05342 |
| 0.04808 | 0.02749 | 0.04007 | 0.01229 | 0.04007 | 0.03286 | 0.04007 | 0.05333 |
| 0.04818 | 0.02767 | 0.04017 | 0.01238 | 0.04016 | 0.03249 | 0.04016 | 0.05352 |
| 0.0483  | 0.0274  | 0.04025 | 0.01201 | 0.04025 | 0.03294 | 0.04025 | 0.05333 |
| 0.0484  | 0.02776 | 0.04035 | 0.01183 | 0.04034 | 0.03277 | 0.04034 | 0.05297 |



|         |         |         |         |         |         |         |         |
|---------|---------|---------|---------|---------|---------|---------|---------|
| 0.04852 | 0.02785 | 0.04045 | 0.01201 | 0.04043 | 0.03286 | 0.04044 | 0.05342 |
| 0.04863 | 0.02795 | 0.04053 | 0.01238 | 0.04053 | 0.03304 | 0.04053 | 0.05352 |
| 0.04874 | 0.02785 | 0.04063 | 0.01193 | 0.04062 | 0.03286 | 0.04062 | 0.05307 |
| 0.04885 | 0.02831 | 0.04072 | 0.01201 | 0.04071 | 0.03294 | 0.04071 | 0.05297 |
| 0.04896 | 0.02812 | 0.04081 | 0.01201 | 0.04081 | 0.03313 | 0.04081 | 0.05288 |
| 0.04908 | 0.02831 | 0.0409  | 0.01201 | 0.0409  | 0.03304 | 0.0409  | 0.05307 |
| 0.04918 | 0.02858 | 0.041   | 0.01201 | 0.04099 | 0.03322 | 0.04099 | 0.05307 |
| 0.0493  | 0.02867 | 0.04109 | 0.01201 | 0.04108 | 0.0334  | 0.04109 | 0.05316 |
| 0.04941 | 0.02867 | 0.04118 | 0.01229 | 0.04118 | 0.03322 | 0.04118 | 0.05307 |
| 0.04952 | 0.02876 | 0.04128 | 0.01238 | 0.04127 | 0.03304 | 0.04127 | 0.05361 |
| 0.04963 | 0.02858 | 0.04137 | 0.01193 | 0.04136 | 0.03331 | 0.04136 | 0.05361 |
| 0.04974 | 0.02913 | 0.04146 | 0.01229 | 0.04146 | 0.0334  | 0.04146 | 0.05325 |
| 0.04985 | 0.02922 | 0.04156 | 0.01211 | 0.04154 | 0.03331 | 0.04155 | 0.0537  |
| 0.04996 | 0.02922 | 0.04165 | 0.01219 | 0.04164 | 0.0334  | 0.04164 | 0.05342 |
| 0.05007 | 0.0294  | 0.04174 | 0.01229 | 0.04173 | 0.0334  | 0.04173 | 0.05361 |
| 0.05019 | 0.0294  | 0.04183 | 0.01238 | 0.04182 | 0.03368 | 0.04182 | 0.0537  |
| 0.0503  | 0.02958 | 0.04193 | 0.01247 | 0.04192 | 0.03377 | 0.04192 | 0.05361 |
| 0.05041 | 0.02968 | 0.04202 | 0.01238 | 0.04201 | 0.03386 | 0.04201 | 0.05342 |
| 0.05052 | 0.02968 | 0.04211 | 0.01247 | 0.0421  | 0.03413 | 0.0421  | 0.05342 |
| 0.05063 | 0.02985 | 0.04221 | 0.01247 | 0.04219 | 0.03413 | 0.0422  | 0.05352 |
| 0.05075 | 0.02958 | 0.04229 | 0.01238 | 0.04229 | 0.03404 | 0.04229 | 0.05397 |
| 0.05085 | 0.02968 | 0.04239 | 0.01247 | 0.04238 | 0.03404 | 0.04238 | 0.05443 |
| 0.05097 | 0.03004 | 0.04248 | 0.01247 | 0.04247 | 0.03422 | 0.04247 | 0.05434 |
| 0.05107 | 0.03004 | 0.04257 | 0.01247 | 0.04257 | 0.03449 | 0.04257 | 0.05434 |
| 0.05119 | 0.03004 | 0.04266 | 0.01238 | 0.04266 | 0.03431 | 0.04266 | 0.05425 |
| 0.05129 | 0.03022 | 0.04276 | 0.01247 | 0.04275 | 0.03441 | 0.04275 | 0.05389 |
| 0.05141 | 0.03058 | 0.04285 | 0.01265 | 0.04284 | 0.03441 | 0.04285 | 0.05379 |
| 0.05152 | 0.03058 | 0.04294 | 0.01284 | 0.04293 | 0.03458 | 0.04293 | 0.05415 |
| 0.05163 | 0.03049 | 0.04304 | 0.01292 | 0.04302 | 0.03486 | 0.04303 | 0.05425 |
| 0.05174 | 0.03076 | 0.04313 | 0.01284 | 0.04312 | 0.03495 | 0.04312 | 0.05434 |
| 0.05185 | 0.03086 | 0.04322 | 0.01284 | 0.04322 | 0.03513 | 0.04322 | 0.05425 |
| 0.05196 | 0.03095 | 0.04331 | 0.01274 | 0.0433  | 0.03504 | 0.04331 | 0.05407 |
| 0.05208 | 0.03104 | 0.04341 | 0.01302 | 0.0434  | 0.03504 | 0.0434  | 0.05397 |
| 0.05219 | 0.0314  | 0.0435  | 0.01302 | 0.04349 | 0.03513 | 0.04349 | 0.05397 |
| 0.0523  | 0.0314  | 0.04359 | 0.0132  | 0.04358 | 0.03513 | 0.04358 | 0.05361 |
| 0.05241 | 0.0314  | 0.04369 | 0.0132  | 0.04367 | 0.03531 | 0.04368 | 0.05389 |
| 0.05252 | 0.03122 | 0.04378 | 0.01292 | 0.04377 | 0.03531 | 0.04377 | 0.05425 |
| 0.05263 | 0.03159 | 0.04387 | 0.0131  | 0.04386 | 0.03577 | 0.04386 | 0.05389 |
| 0.05274 | 0.03149 | 0.04396 | 0.01329 | 0.04395 | 0.03559 | 0.04396 | 0.0537  |
| 0.05286 | 0.03159 | 0.04405 | 0.01347 | 0.04405 | 0.03577 | 0.04405 | 0.0537  |
| 0.05296 | 0.03204 | 0.04415 | 0.01338 | 0.04414 | 0.03604 | 0.04414 | 0.05352 |
| 0.05308 | 0.03159 | 0.04424 | 0.01356 | 0.04423 | 0.03586 | 0.04423 | 0.05325 |
| 0.05318 | 0.03195 | 0.04433 | 0.01329 | 0.04433 | 0.03595 | 0.04433 | 0.05342 |
| 0.0533  | 0.03195 | 0.04442 | 0.0132  | 0.04442 | 0.03604 | 0.04442 | 0.05342 |
| 0.0534  | 0.03222 | 0.04452 | 0.01347 | 0.04451 | 0.03586 | 0.04451 | 0.05379 |
| 0.05352 | 0.03259 | 0.04461 | 0.01329 | 0.0446  | 0.03595 | 0.04461 | 0.05379 |
| 0.05363 | 0.03295 | 0.0447  | 0.01347 | 0.0447  | 0.03631 | 0.0447  | 0.0537  |
| 0.05374 | 0.03259 | 0.0448  | 0.01347 | 0.04478 | 0.03641 | 0.04479 | 0.05352 |
| 0.05385 | 0.03267 | 0.04489 | 0.01356 | 0.04488 | 0.03659 | 0.04488 | 0.05379 |
| 0.05396 | 0.03304 | 0.04498 | 0.01347 | 0.04497 | 0.03659 | 0.04497 | 0.05352 |
| 0.05408 | 0.03331 | 0.04507 | 0.01329 | 0.04506 | 0.03641 | 0.04507 | 0.05389 |
| 0.05418 | 0.03313 | 0.04517 | 0.01347 | 0.04516 | 0.03668 | 0.04516 | 0.05443 |
| 0.0543  | 0.03322 | 0.04526 | 0.01365 | 0.04525 | 0.03668 | 0.04525 | 0.05434 |
| 0.05441 | 0.0335  | 0.04535 | 0.01347 | 0.04534 | 0.03659 | 0.04534 | 0.05407 |

|         |         |         |         |         |         |         |         |
|---------|---------|---------|---------|---------|---------|---------|---------|
| 0.05452 | 0.0334  | 0.04544 | 0.01365 | 0.04544 | 0.03677 | 0.04544 | 0.05425 |
| 0.05463 | 0.03358 | 0.04553 | 0.01383 | 0.04553 | 0.03695 | 0.04553 | 0.05425 |
| 0.05474 | 0.03377 | 0.04563 | 0.01392 | 0.04562 | 0.03686 | 0.04562 | 0.05397 |
| 0.05485 | 0.03386 | 0.04572 | 0.01383 | 0.04571 | 0.03714 | 0.04572 | 0.05415 |
| 0.05497 | 0.03368 | 0.04581 | 0.01374 | 0.04581 | 0.03695 | 0.04581 | 0.05379 |
| 0.05507 | 0.03395 | 0.04591 | 0.01374 | 0.04589 | 0.03677 | 0.0459  | 0.05407 |
| 0.05519 | 0.03414 | 0.046   | 0.01402 | 0.04599 | 0.03714 | 0.04599 | 0.05389 |
| 0.0553  | 0.03404 | 0.04609 | 0.0142  | 0.04609 | 0.03759 | 0.04609 | 0.05425 |
| 0.05541 | 0.03414 | 0.04618 | 0.01402 | 0.04617 | 0.03741 | 0.04618 | 0.05479 |
| 0.05552 | 0.03441 | 0.04628 | 0.01374 | 0.04627 | 0.03777 | 0.04627 | 0.05479 |
| 0.05563 | 0.03477 | 0.04637 | 0.01383 | 0.04636 | 0.03777 | 0.04636 | 0.05488 |
| 0.05575 | 0.03495 | 0.04646 | 0.01402 | 0.04645 | 0.03759 | 0.04645 | 0.0547  |
| 0.05585 | 0.03486 | 0.04656 | 0.0142  | 0.04654 | 0.03768 | 0.04655 | 0.0547  |
| 0.05597 | 0.03541 | 0.04665 | 0.01411 | 0.04664 | 0.0375  | 0.04664 | 0.05524 |
| 0.05607 | 0.0355  | 0.04674 | 0.01411 | 0.04673 | 0.03759 | 0.04673 | 0.0558  |
| 0.05619 | 0.03541 | 0.04683 | 0.01429 | 0.04682 | 0.03813 | 0.04683 | 0.05615 |
| 0.05629 | 0.03531 | 0.04692 | 0.01447 | 0.04692 | 0.03813 | 0.04692 | 0.05588 |
| 0.05641 | 0.03541 | 0.04702 | 0.01429 | 0.04701 | 0.03805 | 0.04701 | 0.05607 |
| 0.05652 | 0.03586 | 0.04711 | 0.01438 | 0.0471  | 0.03832 | 0.0471  | 0.05698 |
| 0.05663 | 0.03596 | 0.04721 | 0.01457 | 0.0472  | 0.03822 | 0.0472  | 0.05725 |
| 0.05674 | 0.03586 | 0.04729 | 0.01457 | 0.04729 | 0.03822 | 0.04729 | 0.05752 |
| 0.05685 | 0.03613 | 0.04739 | 0.01474 | 0.04738 | 0.03832 | 0.04738 | 0.05779 |
| 0.05696 | 0.03596 | 0.04748 | 0.01474 | 0.04747 | 0.03822 | 0.04748 | 0.05771 |
| 0.05707 | 0.03596 | 0.04757 | 0.01466 | 0.04756 | 0.03822 | 0.04756 | 0.05853 |
| 0.05719 | 0.03577 | 0.04767 | 0.01484 | 0.04766 | 0.03859 | 0.04766 | 0.05907 |
| 0.0573  | 0.03604 | 0.04776 | 0.01493 | 0.04775 | 0.03877 | 0.04775 | 0.05907 |
| 0.05741 | 0.03631 | 0.04785 | 0.01438 | 0.04785 | 0.03859 | 0.04785 | 0.05953 |
| 0.05752 | 0.03678 | 0.04794 | 0.01447 | 0.04793 | 0.03859 | 0.04793 | 0.05962 |
| 0.05763 | 0.03678 | 0.04804 | 0.01484 | 0.04803 | 0.03895 | 0.04803 | 0.0598  |
| 0.05774 | 0.03668 | 0.04813 | 0.01484 | 0.04812 | 0.03859 | 0.04812 | 0.05934 |
| 0.05785 | 0.03678 | 0.04822 | 0.01511 | 0.04821 | 0.03877 | 0.04821 | 0.0598  |
| 0.05796 | 0.03686 | 0.04832 | 0.01529 | 0.0483  | 0.03877 | 0.04831 | 0.05998 |
| 0.05808 | 0.03704 | 0.04841 | 0.01501 | 0.0484  | 0.03887 | 0.0484  | 0.06052 |
| 0.05818 | 0.03714 | 0.0485  | 0.01501 | 0.04849 | 0.03923 | 0.04849 | 0.06098 |
| 0.0583  | 0.03722 | 0.04859 | 0.0152  | 0.04858 | 0.03923 | 0.04859 | 0.06071 |
| 0.0584  | 0.0375  | 0.04868 | 0.01529 | 0.04868 | 0.03904 | 0.04868 | 0.06089 |
| 0.05852 | 0.03778 | 0.04878 | 0.01538 | 0.04877 | 0.03941 | 0.04877 | 0.06089 |
| 0.05863 | 0.03796 | 0.04887 | 0.01538 | 0.04886 | 0.03932 | 0.04886 | 0.06089 |
| 0.05874 | 0.03759 | 0.04896 | 0.01547 | 0.04896 | 0.03941 | 0.04896 | 0.06134 |
| 0.05885 | 0.03778 | 0.04905 | 0.01547 | 0.04905 | 0.0395  | 0.04905 | 0.06226 |
| 0.05896 | 0.03768 | 0.04915 | 0.01538 | 0.04914 | 0.0395  | 0.04914 | 0.06216 |
| 0.05908 | 0.03823 | 0.04924 | 0.01529 | 0.04923 | 0.03959 | 0.04924 | 0.06271 |
| 0.05918 | 0.03823 | 0.04933 | 0.01556 | 0.04933 | 0.03995 | 0.04933 | 0.06226 |
| 0.0593  | 0.03832 | 0.04943 | 0.01538 | 0.04941 | 0.03995 | 0.04942 | 0.06235 |
| 0.05941 | 0.03823 | 0.04952 | 0.01538 | 0.04951 | 0.03987 | 0.04951 | 0.06316 |
| 0.05952 | 0.03841 | 0.04961 | 0.01556 | 0.04961 | 0.03995 | 0.04961 | 0.06316 |
| 0.05963 | 0.03859 | 0.0497  | 0.01584 | 0.04969 | 0.04013 | 0.0497  | 0.06299 |
| 0.05974 | 0.03869 | 0.0498  | 0.01602 | 0.04979 | 0.04005 | 0.04979 | 0.06371 |
| 0.05985 | 0.03887 | 0.04989 | 0.01593 | 0.04988 | 0.0405  | 0.04989 | 0.06417 |
| 0.05997 | 0.03914 | 0.04998 | 0.01602 | 0.04997 | 0.04013 | 0.04997 | 0.06417 |
| 0.06007 | 0.03923 | 0.05007 | 0.01584 | 0.05006 | 0.04013 | 0.05007 | 0.06444 |
| 0.06019 | 0.03942 | 0.05016 | 0.01584 | 0.05016 | 0.04041 | 0.05016 | 0.06408 |
| 0.0603  | 0.03942 | 0.05026 | 0.01611 | 0.05025 | 0.04041 | 0.05025 | 0.06408 |
| 0.06041 | 0.03942 | 0.05035 | 0.0162  | 0.05034 | 0.04032 | 0.05035 | 0.06426 |

|         |         |         |         |         |         |         |         |
|---------|---------|---------|---------|---------|---------|---------|---------|
| 0.06052 | 0.03987 | 0.05044 | 0.01639 | 0.05044 | 0.04041 | 0.05044 | 0.06462 |
| 0.06063 | 0.03968 | 0.05054 | 0.01647 | 0.05052 | 0.04032 | 0.05053 | 0.06481 |
| 0.06075 | 0.0396  | 0.05063 | 0.0163  | 0.05062 | 0.04041 | 0.05062 | 0.06453 |
| 0.06085 | 0.03996 | 0.05072 | 0.01639 | 0.05072 | 0.04041 | 0.05072 | 0.0649  |
| 0.06097 | 0.03977 | 0.05081 | 0.01639 | 0.05081 | 0.04078 | 0.05081 | 0.06507 |
| 0.06107 | 0.03977 | 0.05091 | 0.01611 | 0.0509  | 0.04059 | 0.0509  | 0.06562 |
| 0.06119 | 0.04005 | 0.051   | 0.0162  | 0.05099 | 0.04087 | 0.051   | 0.06554 |
| 0.06129 | 0.04014 | 0.05109 | 0.0162  | 0.05108 | 0.04096 | 0.05108 | 0.06581 |
| 0.06141 | 0.04005 | 0.05119 | 0.0163  | 0.05117 | 0.04114 | 0.05118 | 0.06653 |
| 0.06152 | 0.04023 | 0.05127 | 0.01647 | 0.05127 | 0.04105 | 0.05127 | 0.06699 |
| 0.06163 | 0.04068 | 0.05137 | 0.01647 | 0.05136 | 0.04114 | 0.05136 | 0.0669  |
| 0.06174 | 0.04068 | 0.05146 | 0.01639 | 0.05145 | 0.04141 | 0.05146 | 0.06662 |
| 0.06185 | 0.04078 | 0.05155 | 0.01647 | 0.05155 | 0.0416  | 0.05155 | 0.06717 |
| 0.06196 | 0.04078 | 0.05165 | 0.01647 | 0.05164 | 0.04169 | 0.05164 | 0.06699 |
| 0.06207 | 0.04087 | 0.05174 | 0.01665 | 0.05173 | 0.0416  | 0.05173 | 0.06808 |
| 0.06219 | 0.04114 | 0.05184 | 0.01665 | 0.05182 | 0.04177 | 0.05183 | 0.06862 |
| 0.0623  | 0.04132 | 0.05192 | 0.01657 | 0.05192 | 0.04169 | 0.05192 | 0.06854 |
| 0.06241 | 0.04142 | 0.05202 | 0.01665 | 0.05201 | 0.04186 | 0.05201 | 0.06881 |
| 0.06252 | 0.04142 | 0.05211 | 0.01674 | 0.0521  | 0.04223 | 0.05211 | 0.06944 |
| 0.06263 | 0.04169 | 0.0522  | 0.01674 | 0.0522  | 0.04186 | 0.0522  | 0.06908 |
| 0.06274 | 0.04187 | 0.0523  | 0.01702 | 0.05229 | 0.04223 | 0.05229 | 0.06944 |
| 0.06286 | 0.04205 | 0.05239 | 0.01693 | 0.05238 | 0.0425  | 0.05238 | 0.06972 |
| 0.06296 | 0.04223 | 0.05248 | 0.01711 | 0.05248 | 0.04233 | 0.05248 | 0.06972 |
| 0.06308 | 0.04223 | 0.05257 | 0.01711 | 0.05256 | 0.04214 | 0.05257 | 0.07036 |
| 0.06318 | 0.04223 | 0.05267 | 0.01729 | 0.05266 | 0.04233 | 0.05266 | 0.07072 |
| 0.0633  | 0.04242 | 0.05275 | 0.0172  | 0.05275 | 0.04259 | 0.05275 | 0.071   |
| 0.0634  | 0.0425  | 0.05285 | 0.0172  | 0.05284 | 0.04278 | 0.05284 | 0.07154 |
| 0.06352 | 0.04278 | 0.05295 | 0.01739 | 0.05293 | 0.04287 | 0.05294 | 0.07126 |
| 0.06363 | 0.04269 | 0.05304 | 0.01729 | 0.05303 | 0.04305 | 0.05303 | 0.07108 |
| 0.06374 | 0.04305 | 0.05313 | 0.0172  | 0.05312 | 0.04314 | 0.05312 | 0.07136 |
| 0.06385 | 0.04296 | 0.05322 | 0.01747 | 0.05321 | 0.04333 | 0.05322 | 0.07227 |
| 0.06396 | 0.04305 | 0.05331 | 0.01766 | 0.05331 | 0.04314 | 0.05331 | 0.07254 |
| 0.06408 | 0.04314 | 0.05341 | 0.01766 | 0.0534  | 0.04314 | 0.0534  | 0.07263 |
| 0.06418 | 0.04324 | 0.0535  | 0.01784 | 0.05349 | 0.04351 | 0.05349 | 0.07299 |
| 0.0643  | 0.04341 | 0.0536  | 0.01775 | 0.05358 | 0.04369 | 0.05359 | 0.07327 |
| 0.06441 | 0.0436  | 0.05368 | 0.01784 | 0.05368 | 0.04369 | 0.05367 | 0.0739  |
| 0.06452 | 0.0436  | 0.05378 | 0.01802 | 0.05377 | 0.04378 | 0.05377 | 0.074   |
| 0.06463 | 0.0436  | 0.05387 | 0.01812 | 0.05386 | 0.0436  | 0.05387 | 0.0739  |
| 0.06474 | 0.04387 | 0.05396 | 0.01793 | 0.05395 | 0.04387 | 0.05395 | 0.07418 |
| 0.06485 | 0.04424 | 0.05406 | 0.01812 | 0.05405 | 0.04387 | 0.05405 | 0.07427 |
| 0.06497 | 0.0446  | 0.05415 | 0.01812 | 0.05414 | 0.04405 | 0.05414 | 0.07436 |
| 0.06507 | 0.04432 | 0.05424 | 0.01821 | 0.05424 | 0.04442 | 0.05424 | 0.07491 |
| 0.06519 | 0.04432 | 0.05433 | 0.01866 | 0.05432 | 0.04442 | 0.05432 | 0.07518 |
| 0.0653  | 0.0446  | 0.05443 | 0.0183  | 0.05442 | 0.04432 | 0.05442 | 0.07581 |
| 0.06541 | 0.04442 | 0.05452 | 0.01802 | 0.05451 | 0.04405 | 0.05451 | 0.07609 |
| 0.06552 | 0.04442 | 0.05461 | 0.01793 | 0.0546  | 0.04432 | 0.0546  | 0.07672 |
| 0.06563 | 0.0446  | 0.05471 | 0.01812 | 0.05469 | 0.04469 | 0.0547  | 0.07691 |
| 0.06574 | 0.04469 | 0.0548  | 0.0183  | 0.05479 | 0.04459 | 0.05479 | 0.077   |
| 0.06585 | 0.04478 | 0.05489 | 0.01821 | 0.05488 | 0.04459 | 0.05488 | 0.07736 |
| 0.06597 | 0.04515 | 0.05498 | 0.0183  | 0.05497 | 0.04469 | 0.05497 | 0.07709 |
| 0.06607 | 0.04506 | 0.05507 | 0.01856 | 0.05507 | 0.04487 | 0.05507 | 0.078   |
| 0.06619 | 0.04524 | 0.05517 | 0.01856 | 0.05515 | 0.04478 | 0.05516 | 0.07809 |
| 0.06629 | 0.04533 | 0.05526 | 0.01902 | 0.05525 | 0.04506 | 0.05525 | 0.07828 |
| 0.06641 | 0.04533 | 0.05535 | 0.01921 | 0.05534 | 0.04532 | 0.05535 | 0.07855 |

|         |         |         |         |         |         |         |         |
|---------|---------|---------|---------|---------|---------|---------|---------|
| 0.06652 | 0.04542 | 0.05544 | 0.01902 | 0.05544 | 0.0456  | 0.05544 | 0.07927 |
| 0.06663 | 0.04579 | 0.05554 | 0.01911 | 0.05553 | 0.04551 | 0.05553 | 0.07973 |
| 0.06674 | 0.04569 | 0.05563 | 0.01911 | 0.05562 | 0.04551 | 0.05562 | 0.0801  |
| 0.06685 | 0.04569 | 0.05572 | 0.01911 | 0.05571 | 0.0456  | 0.05571 | 0.07991 |
| 0.06696 | 0.04623 | 0.05582 | 0.01902 | 0.0558  | 0.04569 | 0.05581 | 0.0801  |
| 0.06708 | 0.04642 | 0.05591 | 0.01938 | 0.0559  | 0.04551 | 0.0559  | 0.08055 |
| 0.06719 | 0.04642 | 0.056   | 0.01921 | 0.05599 | 0.04569 | 0.056   | 0.08074 |
| 0.0673  | 0.04642 | 0.05609 | 0.01921 | 0.05608 | 0.04596 | 0.05608 | 0.08074 |
| 0.06741 | 0.0466  | 0.05619 | 0.01911 | 0.05618 | 0.04633 | 0.05618 | 0.08137 |
| 0.06752 | 0.0466  | 0.05627 | 0.01929 | 0.05627 | 0.0466  | 0.05627 | 0.08146 |
| 0.06763 | 0.0466  | 0.05637 | 0.01957 | 0.05636 | 0.04642 | 0.05636 | 0.08201 |
| 0.06774 | 0.0466  | 0.05646 | 0.01948 | 0.05645 | 0.04633 | 0.05646 | 0.08265 |
| 0.06786 | 0.04678 | 0.05655 | 0.01957 | 0.05655 | 0.04633 | 0.05655 | 0.08273 |
| 0.06796 | 0.04715 | 0.05665 | 0.01984 | 0.05664 | 0.04633 | 0.05664 | 0.08282 |
| 0.06808 | 0.04697 | 0.05674 | 0.01984 | 0.05673 | 0.0466  | 0.05673 | 0.08319 |
| 0.06818 | 0.04706 | 0.05683 | 0.01975 | 0.05683 | 0.04688 | 0.05683 | 0.08382 |
| 0.0683  | 0.04697 | 0.05692 | 0.01994 | 0.05692 | 0.04705 | 0.05692 | 0.08355 |
| 0.0684  | 0.04715 | 0.05702 | 0.02012 | 0.05701 | 0.04733 | 0.05701 | 0.08438 |
| 0.06852 | 0.04751 | 0.05711 | 0.02002 | 0.0571  | 0.04751 | 0.05711 | 0.08464 |
| 0.06863 | 0.04761 | 0.0572  | 0.02002 | 0.05719 | 0.04733 | 0.05719 | 0.08456 |
| 0.06874 | 0.04769 | 0.0573  | 0.02012 | 0.05729 | 0.04733 | 0.05729 | 0.0851  |
| 0.06885 | 0.04778 | 0.05739 | 0.02002 | 0.05738 | 0.04788 | 0.05738 | 0.08556 |
| 0.06896 | 0.04806 | 0.05748 | 0.01994 | 0.05748 | 0.04769 | 0.05748 | 0.08583 |
| 0.06908 | 0.04796 | 0.05757 | 0.02012 | 0.05756 | 0.0476  | 0.05757 | 0.0861  |
| 0.06919 | 0.04796 | 0.05767 | 0.02012 | 0.05766 | 0.04796 | 0.05766 | 0.0861  |
| 0.0693  | 0.04806 | 0.05776 | 0.02029 | 0.05775 | 0.04815 | 0.05775 | 0.08674 |
| 0.06941 | 0.04843 | 0.05785 | 0.02066 | 0.05784 | 0.04815 | 0.05784 | 0.08702 |
| 0.06952 | 0.04833 | 0.05794 | 0.02066 | 0.05794 | 0.04842 | 0.05794 | 0.08756 |
| 0.06963 | 0.04843 | 0.05803 | 0.02066 | 0.05803 | 0.04851 | 0.05803 | 0.08756 |
| 0.06974 | 0.04843 | 0.05813 | 0.02076 | 0.05812 | 0.0486  | 0.05812 | 0.08765 |
| 0.06985 | 0.04843 | 0.05823 | 0.02093 | 0.05821 | 0.04879 | 0.05822 | 0.08783 |
| 0.06996 | 0.04888 | 0.05831 | 0.02103 | 0.05831 | 0.0486  | 0.05831 | 0.08819 |
| 0.07007 | 0.04869 | 0.05841 | 0.02093 | 0.05839 | 0.04869 | 0.0584  | 0.08865 |
| 0.07019 | 0.04879 | 0.0585  | 0.02111 | 0.05849 | 0.04924 | 0.05849 | 0.08911 |
| 0.0703  | 0.04924 | 0.05859 | 0.02111 | 0.05859 | 0.04915 | 0.05858 | 0.08901 |
| 0.07041 | 0.04933 | 0.05868 | 0.02111 | 0.05868 | 0.04933 | 0.05868 | 0.08965 |
| 0.07052 | 0.04943 | 0.05878 | 0.02111 | 0.05877 | 0.04915 | 0.05877 | 0.09029 |
| 0.07063 | 0.04943 | 0.05886 | 0.02093 | 0.05886 | 0.04942 | 0.05886 | 0.09093 |
| 0.07075 | 0.04961 | 0.05896 | 0.02076 | 0.05895 | 0.04951 | 0.05895 | 0.0912  |
| 0.07085 | 0.04988 | 0.05906 | 0.02103 | 0.05904 | 0.04978 | 0.05905 | 0.09129 |
| 0.07097 | 0.0497  | 0.05914 | 0.0212  | 0.05914 | 0.0497  | 0.05914 | 0.09147 |
| 0.07107 | 0.05006 | 0.05924 | 0.02148 | 0.05923 | 0.04987 | 0.05923 | 0.09202 |
| 0.07119 | 0.05024 | 0.05933 | 0.02148 | 0.05932 | 0.0497  | 0.05933 | 0.09229 |
| 0.0713  | 0.05034 | 0.05943 | 0.02148 | 0.05942 | 0.04961 | 0.05942 | 0.09274 |
| 0.07141 | 0.05024 | 0.05952 | 0.02166 | 0.05951 | 0.04987 | 0.05951 | 0.09274 |
| 0.07152 | 0.05034 | 0.05961 | 0.02157 | 0.0596  | 0.04997 | 0.0596  | 0.09274 |
| 0.07163 | 0.05051 | 0.05971 | 0.02157 | 0.0597  | 0.05006 | 0.0597  | 0.0933  |
| 0.07174 | 0.05061 | 0.05979 | 0.02194 | 0.05979 | 0.0497  | 0.05979 | 0.09402 |
| 0.07185 | 0.05088 | 0.05989 | 0.02184 | 0.05988 | 0.04997 | 0.05988 | 0.0943  |
| 0.07196 | 0.05133 | 0.05998 | 0.02175 | 0.05997 | 0.05006 | 0.05998 | 0.09456 |
| 0.07208 | 0.05142 | 0.06007 | 0.02203 | 0.06007 | 0.0497  | 0.06007 | 0.09521 |
| 0.07219 | 0.05133 | 0.06017 | 0.02212 | 0.06016 | 0.04961 | 0.06016 | 0.09521 |
| 0.0723  | 0.05142 | 0.06026 | 0.02212 | 0.06025 | 0.04987 | 0.06025 | 0.09584 |
| 0.07241 | 0.05142 | 0.06035 | 0.0223  | 0.06034 | 0.04997 | 0.06034 | 0.09648 |

|         |         |         |         |         |         |         |         |
|---------|---------|---------|---------|---------|---------|---------|---------|
| 0.07252 | 0.0517  | 0.06044 | 0.0223  | 0.06043 | 0.04978 | 0.06044 | 0.09666 |
| 0.07263 | 0.05161 | 0.06054 | 0.02239 | 0.06053 | 0.04978 | 0.06053 | 0.09693 |
| 0.07274 | 0.05161 | 0.06063 | 0.0223  | 0.06062 | 0.0497  | 0.06063 | 0.09766 |
| 0.07286 | 0.05179 | 0.06072 | 0.02239 | 0.06071 | 0.04997 | 0.06071 | 0.09811 |
| 0.07296 | 0.05188 | 0.06082 | 0.02257 | 0.06081 | 0.0497  | 0.06081 | 0.09785 |
| 0.07308 | 0.05188 | 0.0609  | 0.02266 | 0.0609  | 0.04961 | 0.0609  | 0.09802 |
| 0.07318 | 0.05206 | 0.061   | 0.02239 | 0.06099 | 0.05015 | 0.06099 | 0.09857 |
| 0.0733  | 0.05215 | 0.06109 | 0.0223  | 0.06108 | 0.05015 | 0.06109 | 0.09884 |
| 0.0734  | 0.05233 | 0.06119 | 0.02239 | 0.06118 | 0.04997 | 0.06118 | 0.09912 |
| 0.07352 | 0.0527  | 0.06128 | 0.02257 | 0.06127 | 0.05006 | 0.06127 | 0.09948 |
| 0.07363 | 0.05233 | 0.06137 | 0.02266 | 0.06136 | 0.04997 | 0.06136 | 0.09976 |
| 0.07374 | 0.05243 | 0.06146 | 0.02266 | 0.06146 | 0.04997 | 0.06146 | 0.1003  |
| 0.07385 | 0.05243 | 0.06155 | 0.02266 | 0.06154 | 0.05015 | 0.06154 | 0.10103 |
| 0.07396 | 0.05288 | 0.06165 | 0.02285 | 0.06164 | 0.05033 | 0.06164 | 0.10112 |
| 0.07408 | 0.05279 | 0.06174 | 0.02303 | 0.06173 | 0.04997 | 0.06174 | 0.10103 |
| 0.07418 | 0.05288 | 0.06183 | 0.02312 | 0.06183 | 0.05006 | 0.06183 | 0.10094 |
| 0.0743  | 0.05307 | 0.06193 | 0.02339 | 0.06191 | 0.04997 | 0.06192 | 0.10158 |
| 0.07441 | 0.05325 | 0.06202 | 0.0233  | 0.06201 | 0.04997 | 0.06201 | 0.10212 |
| 0.07452 | 0.05333 | 0.06211 | 0.02321 | 0.06211 | 0.05015 | 0.06211 | 0.10239 |
| 0.07463 | 0.0537  | 0.0622  | 0.02321 | 0.06219 | 0.05006 | 0.0622  | 0.10221 |
| 0.07474 | 0.05389 | 0.0623  | 0.02303 | 0.06229 | 0.04997 | 0.06229 | 0.10239 |
| 0.07485 | 0.0537  | 0.06238 | 0.02321 | 0.06238 | 0.05033 | 0.06238 | 0.10294 |
| 0.07497 | 0.0537  | 0.06248 | 0.02339 | 0.06247 | 0.05024 | 0.06247 | 0.10322 |
| 0.07507 | 0.05361 | 0.06257 | 0.02339 | 0.06257 | 0.05015 | 0.06257 | 0.10404 |
| 0.07519 | 0.05407 | 0.06266 | 0.02358 | 0.06266 | 0.05006 | 0.06266 | 0.1044  |
| 0.0753  | 0.05407 | 0.06276 | 0.02385 | 0.06275 | 0.05024 | 0.06275 | 0.10458 |
| 0.07541 | 0.05389 | 0.06285 | 0.02385 | 0.06284 | 0.05024 | 0.06285 | 0.10494 |
| 0.07552 | 0.05407 | 0.06294 | 0.02366 | 0.06294 | 0.05033 | 0.06294 | 0.10513 |
| 0.07563 | 0.05443 | 0.06304 | 0.02403 | 0.06302 | 0.05042 | 0.06303 | 0.10558 |
| 0.07575 | 0.05434 | 0.06313 | 0.02403 | 0.06312 | 0.05061 | 0.06312 | 0.10549 |
| 0.07585 | 0.05415 | 0.06322 | 0.02385 | 0.06322 | 0.05033 | 0.06322 | 0.10549 |
| 0.07597 | 0.05443 | 0.06331 | 0.02412 | 0.0633  | 0.05015 | 0.0633  | 0.1064  |
| 0.07607 | 0.05425 | 0.06341 | 0.02421 | 0.0634  | 0.04978 | 0.0634  | 0.10667 |
| 0.07619 | 0.05443 | 0.0635  | 0.02394 | 0.06349 | 0.0497  | 0.0635  | 0.10685 |
| 0.07629 | 0.0547  | 0.06359 | 0.02403 | 0.06358 | 0.04978 | 0.06358 | 0.10713 |
| 0.07641 | 0.05488 | 0.06369 | 0.0243  | 0.06367 | 0.04997 | 0.06368 | 0.10785 |
| 0.07652 | 0.05525 | 0.06377 | 0.02421 | 0.06377 | 0.05015 | 0.06377 | 0.10794 |
| 0.07663 | 0.05497 | 0.06387 | 0.02439 | 0.06386 | 0.04987 | 0.06386 | 0.10831 |
| 0.07674 | 0.05507 | 0.06396 | 0.02448 | 0.06395 | 0.0497  | 0.06396 | 0.10895 |
| 0.07685 | 0.05516 | 0.06406 | 0.02448 | 0.06405 | 0.05033 | 0.06405 | 0.10886 |
| 0.07696 | 0.05507 | 0.06414 | 0.02475 | 0.06414 | 0.05033 | 0.06414 | 0.10895 |
| 0.07707 | 0.05516 | 0.06424 | 0.02485 | 0.06423 | 0.05042 | 0.06423 | 0.10959 |
| 0.07719 | 0.05534 | 0.06433 | 0.02503 | 0.06432 | 0.05061 | 0.06433 | 0.11004 |
| 0.0773  | 0.0558  | 0.06442 | 0.02512 | 0.06442 | 0.05079 | 0.06442 | 0.11049 |
| 0.07741 | 0.05562 | 0.06452 | 0.02512 | 0.06451 | 0.05079 | 0.06451 | 0.11058 |
| 0.07752 | 0.0558  | 0.06461 | 0.02512 | 0.0646  | 0.05079 | 0.06461 | 0.11095 |
| 0.07763 | 0.05588 | 0.0647  | 0.02512 | 0.0647  | 0.05088 | 0.0647  | 0.11159 |
| 0.07774 | 0.0557  | 0.0648  | 0.0253  | 0.06478 | 0.05115 | 0.06479 | 0.11195 |
| 0.07786 | 0.05597 | 0.06489 | 0.0254  | 0.06488 | 0.05106 | 0.06488 | 0.11204 |
| 0.07796 | 0.05616 | 0.06498 | 0.02512 | 0.06498 | 0.05142 | 0.06498 | 0.11241 |
| 0.07808 | 0.05625 | 0.06507 | 0.02512 | 0.06507 | 0.05133 | 0.06507 | 0.11305 |
| 0.07818 | 0.05643 | 0.06517 | 0.0253  | 0.06516 | 0.05152 | 0.06516 | 0.11331 |
| 0.0783  | 0.05662 | 0.06526 | 0.0253  | 0.06525 | 0.05188 | 0.06526 | 0.11331 |
| 0.0784  | 0.05662 | 0.06535 | 0.0253  | 0.06534 | 0.05206 | 0.06534 | 0.11377 |

|         |         |         |         |         |         |         |         |
|---------|---------|---------|---------|---------|---------|---------|---------|
| 0.07852 | 0.05662 | 0.06545 | 0.0253  | 0.06543 | 0.05243 | 0.06544 | 0.11377 |
| 0.07863 | 0.05698 | 0.06554 | 0.0253  | 0.06553 | 0.0527  | 0.06553 | 0.11496 |
| 0.07874 | 0.05707 | 0.06563 | 0.0254  | 0.06562 | 0.0527  | 0.06562 | 0.11577 |
| 0.07885 | 0.05725 | 0.06572 | 0.02558 | 0.06571 | 0.05306 | 0.06572 | 0.11532 |
| 0.07896 | 0.05743 | 0.06582 | 0.02576 | 0.06581 | 0.05306 | 0.06581 | 0.11559 |
| 0.07908 | 0.05734 | 0.06591 | 0.02585 | 0.0659  | 0.05288 | 0.0659  | 0.11623 |
| 0.07918 | 0.05752 | 0.066   | 0.02576 | 0.06599 | 0.05316 | 0.06599 | 0.11632 |
| 0.0793  | 0.05789 | 0.0661  | 0.02576 | 0.06608 | 0.05361 | 0.06609 | 0.1166  |
| 0.07941 | 0.05798 | 0.06618 | 0.02612 | 0.06618 | 0.05388 | 0.06617 | 0.11705 |
| 0.07952 | 0.05798 | 0.06628 | 0.02594 | 0.06627 | 0.05397 | 0.06627 | 0.11741 |
| 0.07963 | 0.05835 | 0.06637 | 0.02594 | 0.06636 | 0.05407 | 0.06637 | 0.1175  |
| 0.07974 | 0.05844 | 0.06646 | 0.02594 | 0.06645 | 0.05425 | 0.06645 | 0.11814 |
| 0.07985 | 0.05825 | 0.06656 | 0.02594 | 0.06655 | 0.05461 | 0.06655 | 0.11868 |
| 0.07996 | 0.05825 | 0.06665 | 0.02612 | 0.06664 | 0.05452 | 0.06664 | 0.11905 |
| 0.08007 | 0.05853 | 0.06674 | 0.02603 | 0.06673 | 0.05479 | 0.06673 | 0.11933 |
| 0.08019 | 0.05861 | 0.06683 | 0.0263  | 0.06682 | 0.05488 | 0.06682 | 0.11942 |
| 0.0803  | 0.05889 | 0.06693 | 0.0264  | 0.06692 | 0.05488 | 0.06692 | 0.11978 |
| 0.08041 | 0.0588  | 0.06702 | 0.0264  | 0.06701 | 0.05497 | 0.06701 | 0.12023 |
| 0.08052 | 0.05907 | 0.06711 | 0.0264  | 0.0671  | 0.05524 | 0.0671  | 0.12023 |
| 0.08063 | 0.05916 | 0.06721 | 0.02648 | 0.06719 | 0.05534 | 0.0672  | 0.12096 |
| 0.08075 | 0.05926 | 0.06729 | 0.0264  | 0.06729 | 0.05534 | 0.06729 | 0.12169 |
| 0.08085 | 0.05926 | 0.06739 | 0.02648 | 0.06738 | 0.0557  | 0.06738 | 0.12151 |
| 0.08097 | 0.05971 | 0.06748 | 0.0264  | 0.06747 | 0.0557  | 0.06747 | 0.12169 |
| 0.08107 | 0.05989 | 0.06757 | 0.02667 | 0.06757 | 0.05552 | 0.06757 | 0.12215 |
| 0.08119 | 0.0598  | 0.06766 | 0.0264  | 0.06766 | 0.05607 | 0.06766 | 0.12278 |
| 0.08129 | 0.06025 | 0.06776 | 0.0264  | 0.06775 | 0.05607 | 0.06775 | 0.12351 |
| 0.08141 | 0.06025 | 0.06785 | 0.02658 | 0.06785 | 0.05615 | 0.06785 | 0.12387 |
| 0.08152 | 0.06007 | 0.06794 | 0.02667 | 0.06793 | 0.05625 | 0.06793 | 0.12415 |
| 0.08163 | 0.06052 | 0.06804 | 0.02703 | 0.06803 | 0.05634 | 0.06803 | 0.12424 |
| 0.08174 | 0.06044 | 0.06813 | 0.02694 | 0.06812 | 0.05689 | 0.06812 | 0.12461 |
| 0.08185 | 0.06098 | 0.06822 | 0.02676 | 0.06821 | 0.05706 | 0.06821 | 0.12496 |
| 0.08196 | 0.06108 | 0.06832 | 0.02685 | 0.0683  | 0.05689 | 0.06831 | 0.12524 |
| 0.08207 | 0.06089 | 0.06841 | 0.02694 | 0.0684  | 0.05734 | 0.0684  | 0.12615 |
| 0.08219 | 0.0608  | 0.0685  | 0.02703 | 0.06849 | 0.05716 | 0.06849 | 0.12624 |
| 0.0823  | 0.06108 | 0.06859 | 0.02712 | 0.06858 | 0.05725 | 0.06858 | 0.12606 |
| 0.08241 | 0.06135 | 0.06869 | 0.0274  | 0.06868 | 0.05734 | 0.06868 | 0.12697 |
| 0.08252 | 0.06135 | 0.06878 | 0.02776 | 0.06877 | 0.05734 | 0.06877 | 0.12715 |
| 0.08263 | 0.06108 | 0.06887 | 0.02785 | 0.06886 | 0.05752 | 0.06886 | 0.12788 |
| 0.08274 | 0.06144 | 0.06896 | 0.02795 | 0.06895 | 0.05771 | 0.06896 | 0.12861 |
| 0.08286 | 0.06153 | 0.06905 | 0.02749 | 0.06905 | 0.05788 | 0.06905 | 0.12852 |
| 0.08296 | 0.06144 | 0.06915 | 0.0273  | 0.06914 | 0.05779 | 0.06914 | 0.1287  |
| 0.08308 | 0.06153 | 0.06924 | 0.02758 | 0.06923 | 0.05779 | 0.06923 | 0.12943 |
| 0.08318 | 0.06135 | 0.06933 | 0.02758 | 0.06933 | 0.05779 | 0.06933 | 0.13007 |
| 0.0833  | 0.06162 | 0.06942 | 0.02776 | 0.06941 | 0.05788 | 0.06942 | 0.13088 |
| 0.08341 | 0.06162 | 0.06952 | 0.02785 | 0.06951 | 0.05825 | 0.06951 | 0.1307  |
| 0.08352 | 0.06162 | 0.06961 | 0.02795 | 0.0696  | 0.0588  | 0.06961 | 0.13097 |
| 0.08363 | 0.0619  | 0.0697  | 0.02803 | 0.0697  | 0.05861 | 0.0697  | 0.13152 |
| 0.08374 | 0.06207 | 0.0698  | 0.02795 | 0.06978 | 0.0587  | 0.06979 | 0.13197 |
| 0.08385 | 0.06244 | 0.06989 | 0.02803 | 0.06988 | 0.0588  | 0.06988 | 0.13197 |
| 0.08396 | 0.06253 | 0.06998 | 0.02812 | 0.06997 | 0.05889 | 0.06997 | 0.13225 |
| 0.08408 | 0.06253 | 0.07007 | 0.0283  | 0.07006 | 0.05916 | 0.07007 | 0.13262 |
| 0.08419 | 0.06244 | 0.07017 | 0.02849 | 0.07016 | 0.05916 | 0.07016 | 0.13289 |
| 0.0843  | 0.0628  | 0.07026 | 0.0283  | 0.07025 | 0.05916 | 0.07025 | 0.13362 |
| 0.08441 | 0.06316 | 0.07035 | 0.02849 | 0.07034 | 0.05953 | 0.07034 | 0.13434 |

|         |         |         |         |         |         |         |         |
|---------|---------|---------|---------|---------|---------|---------|---------|
| 0.08452 | 0.06299 | 0.07045 | 0.02867 | 0.07044 | 0.05971 | 0.07044 | 0.13434 |
| 0.08463 | 0.06316 | 0.07053 | 0.02876 | 0.07053 | 0.05962 | 0.07053 | 0.13479 |
| 0.08474 | 0.06326 | 0.07063 | 0.02867 | 0.07062 | 0.05953 | 0.07062 | 0.13516 |
| 0.08485 | 0.06344 | 0.07072 | 0.02867 | 0.07071 | 0.06007 | 0.07072 | 0.13553 |
| 0.08497 | 0.06335 | 0.07081 | 0.02867 | 0.07081 | 0.06035 | 0.07081 | 0.13598 |
| 0.08507 | 0.06363 | 0.07091 | 0.02885 | 0.0709  | 0.06061 | 0.0709  | 0.13653 |
| 0.08519 | 0.06372 | 0.071   | 0.02885 | 0.07099 | 0.06052 | 0.07099 | 0.1368  |
| 0.0853  | 0.06398 | 0.07109 | 0.02885 | 0.07109 | 0.06071 | 0.07108 | 0.13717 |
| 0.08541 | 0.06398 | 0.07118 | 0.02921 | 0.07118 | 0.0608  | 0.07118 | 0.13762 |
| 0.08552 | 0.06417 | 0.07128 | 0.0293  | 0.07127 | 0.06108 | 0.07127 | 0.13808 |
| 0.08563 | 0.06426 | 0.07137 | 0.0293  | 0.07136 | 0.06089 | 0.07136 | 0.13816 |
| 0.08575 | 0.06453 | 0.07146 | 0.0294  | 0.07146 | 0.06108 | 0.07145 | 0.13853 |
| 0.08585 | 0.06444 | 0.07156 | 0.02949 | 0.07154 | 0.06108 | 0.07155 | 0.13853 |
| 0.08597 | 0.06481 | 0.07164 | 0.02949 | 0.07164 | 0.06125 | 0.07164 | 0.13889 |
| 0.08607 | 0.06481 | 0.07174 | 0.0293  | 0.07173 | 0.06134 | 0.07173 | 0.13962 |
| 0.08619 | 0.0649  | 0.07183 | 0.0294  | 0.07182 | 0.06125 | 0.07183 | 0.13998 |
| 0.0863  | 0.06536 | 0.07192 | 0.02958 | 0.07192 | 0.06162 | 0.07192 | 0.14017 |
| 0.08641 | 0.06517 | 0.07202 | 0.02976 | 0.07201 | 0.06162 | 0.07201 | 0.14044 |
| 0.08652 | 0.06544 | 0.07211 | 0.02985 | 0.0721  | 0.06162 | 0.0721  | 0.14081 |
| 0.08663 | 0.06562 | 0.0722  | 0.03004 | 0.0722  | 0.06189 | 0.0722  | 0.1418  |
| 0.08674 | 0.06562 | 0.07229 | 0.03004 | 0.07229 | 0.06207 | 0.07229 | 0.14226 |
| 0.08685 | 0.06554 | 0.07239 | 0.03021 | 0.07238 | 0.06216 | 0.07238 | 0.14217 |
| 0.08696 | 0.06581 | 0.07248 | 0.0304  | 0.07247 | 0.06226 | 0.07248 | 0.14262 |
| 0.08708 | 0.0659  | 0.07257 | 0.0304  | 0.07256 | 0.06226 | 0.07256 | 0.14308 |
| 0.08719 | 0.06617 | 0.07267 | 0.03021 | 0.07265 | 0.06271 | 0.07266 | 0.14326 |
| 0.0873  | 0.06662 | 0.07276 | 0.0304  | 0.07275 | 0.06253 | 0.07275 | 0.14354 |
| 0.08741 | 0.06626 | 0.07285 | 0.03076 | 0.07285 | 0.06262 | 0.07285 | 0.1439  |
| 0.08752 | 0.06626 | 0.07294 | 0.03076 | 0.07293 | 0.06299 | 0.07294 | 0.1439  |
| 0.08763 | 0.06635 | 0.07304 | 0.03086 | 0.07303 | 0.06307 | 0.07303 | 0.14408 |
| 0.08774 | 0.06654 | 0.07313 | 0.03068 | 0.07312 | 0.06325 | 0.07312 | 0.14454 |
| 0.08786 | 0.06672 | 0.07322 | 0.03076 | 0.07321 | 0.06289 | 0.07321 | 0.14508 |
| 0.08796 | 0.06699 | 0.07332 | 0.03076 | 0.0733  | 0.06353 | 0.07331 | 0.14563 |
| 0.08808 | 0.06699 | 0.0734  | 0.03094 | 0.0734  | 0.06398 | 0.0734  | 0.14627 |
| 0.08818 | 0.06708 | 0.0735  | 0.03104 | 0.07349 | 0.0638  | 0.07349 | 0.14636 |
| 0.0883  | 0.06699 | 0.07359 | 0.03104 | 0.07358 | 0.0638  | 0.07359 | 0.14636 |
| 0.0884  | 0.06708 | 0.07368 | 0.03104 | 0.07368 | 0.06417 | 0.07368 | 0.14672 |
| 0.08852 | 0.06744 | 0.07378 | 0.03122 | 0.07377 | 0.06444 | 0.07377 | 0.14708 |
| 0.08863 | 0.06744 | 0.07387 | 0.0314  | 0.07386 | 0.06417 | 0.07386 | 0.14808 |
| 0.08874 | 0.06781 | 0.07396 | 0.03159 | 0.07396 | 0.06453 | 0.07396 | 0.14836 |
| 0.08885 | 0.06808 | 0.07405 | 0.0314  | 0.07405 | 0.06453 | 0.07405 | 0.14836 |
| 0.08896 | 0.06817 | 0.07415 | 0.0314  | 0.07414 | 0.06426 | 0.07414 | 0.14863 |
| 0.08908 | 0.06817 | 0.07424 | 0.03159 | 0.07423 | 0.06453 | 0.07424 | 0.149   |
| 0.08919 | 0.06836 | 0.07433 | 0.03176 | 0.07433 | 0.06462 | 0.07433 | 0.14909 |
| 0.0893  | 0.06836 | 0.07443 | 0.03176 | 0.07441 | 0.06508 | 0.07442 | 0.14981 |
| 0.08941 | 0.06854 | 0.07452 | 0.03159 | 0.07451 | 0.06526 | 0.07451 | 0.15    |
| 0.08952 | 0.06881 | 0.07461 | 0.03176 | 0.0746  | 0.06526 | 0.0746  | 0.1499  |
| 0.08963 | 0.06881 | 0.0747  | 0.03159 | 0.07469 | 0.06553 | 0.0747  | 0.15045 |
| 0.08974 | 0.0689  | 0.0748  | 0.03195 | 0.07479 | 0.06572 | 0.07479 | 0.15081 |
| 0.08985 | 0.06927 | 0.07489 | 0.03195 | 0.07488 | 0.06572 | 0.07489 | 0.15072 |
| 0.08996 | 0.06963 | 0.07498 | 0.03213 | 0.07497 | 0.06562 | 0.07497 | 0.15109 |
| 0.09007 | 0.06935 | 0.07508 | 0.03241 | 0.07506 | 0.06581 | 0.07507 | 0.15164 |
| 0.09019 | 0.06954 | 0.07516 | 0.03249 | 0.07516 | 0.06589 | 0.07516 | 0.15209 |
| 0.0903  | 0.06963 | 0.07526 | 0.03249 | 0.07525 | 0.06572 | 0.07525 | 0.15272 |
| 0.09041 | 0.06972 | 0.07535 | 0.03267 | 0.07534 | 0.06617 | 0.07535 | 0.15327 |

|         |         |         |         |         |         |         |         |
|---------|---------|---------|---------|---------|---------|---------|---------|
| 0.09052 | 0.06981 | 0.07544 | 0.03241 | 0.07544 | 0.06635 | 0.07544 | 0.15327 |
| 0.09063 | 0.07    | 0.07554 | 0.03231 | 0.07553 | 0.06644 | 0.07553 | 0.15373 |
| 0.09075 | 0.07027 | 0.07563 | 0.03259 | 0.07562 | 0.06654 | 0.07562 | 0.15445 |
| 0.09085 | 0.07017 | 0.07572 | 0.03259 | 0.07572 | 0.06662 | 0.07572 | 0.15437 |
| 0.09097 | 0.07063 | 0.07581 | 0.03259 | 0.07581 | 0.0669  | 0.07581 | 0.15464 |
| 0.09107 | 0.07054 | 0.07591 | 0.03267 | 0.0759  | 0.06726 | 0.0759  | 0.15482 |
| 0.09119 | 0.07063 | 0.076   | 0.03304 | 0.07599 | 0.06717 | 0.07599 | 0.15518 |
| 0.09129 | 0.07045 | 0.07609 | 0.03304 | 0.07609 | 0.0669  | 0.07609 | 0.15537 |
| 0.09141 | 0.07063 | 0.07619 | 0.0335  | 0.07618 | 0.06717 | 0.07618 | 0.15573 |
| 0.09152 | 0.071   | 0.07627 | 0.0334  | 0.07627 | 0.06735 | 0.07627 | 0.15573 |
| 0.09163 | 0.07118 | 0.07637 | 0.03313 | 0.07637 | 0.06744 | 0.07636 | 0.156   |
| 0.09174 | 0.07127 | 0.07646 | 0.03358 | 0.07645 | 0.0678  | 0.07646 | 0.15637 |
| 0.09185 | 0.07118 | 0.07655 | 0.03368 | 0.07655 | 0.06799 | 0.07655 | 0.15637 |
| 0.09196 | 0.07136 | 0.07665 | 0.03368 | 0.07664 | 0.06772 | 0.07664 | 0.15646 |
| 0.09208 | 0.07136 | 0.07674 | 0.0335  | 0.07673 | 0.0678  | 0.07673 | 0.1571  |
| 0.09219 | 0.07191 | 0.07683 | 0.03377 | 0.07682 | 0.06808 | 0.07683 | 0.15765 |
| 0.0923  | 0.07191 | 0.07692 | 0.03377 | 0.07692 | 0.06817 | 0.07692 | 0.1581  |
| 0.09241 | 0.07209 | 0.07702 | 0.03386 | 0.07701 | 0.06826 | 0.07701 | 0.15864 |
| 0.09252 | 0.07218 | 0.07711 | 0.03404 | 0.0771  | 0.06871 | 0.07711 | 0.15855 |
| 0.09263 | 0.07245 | 0.0772  | 0.03386 | 0.0772  | 0.06871 | 0.0772  | 0.15864 |
| 0.09274 | 0.07282 | 0.0773  | 0.03413 | 0.07728 | 0.0689  | 0.07729 | 0.1591  |
| 0.09286 | 0.0729  | 0.07739 | 0.03422 | 0.07738 | 0.06918 | 0.07738 | 0.15919 |
| 0.09296 | 0.07327 | 0.07748 | 0.03432 | 0.07748 | 0.06944 | 0.07748 | 0.15937 |
| 0.09308 | 0.07355 | 0.07757 | 0.03441 | 0.07756 | 0.06954 | 0.07757 | 0.15982 |
| 0.09318 | 0.07327 | 0.07767 | 0.03449 | 0.07766 | 0.06927 | 0.07766 | 0.1601  |
| 0.0933  | 0.07345 | 0.07775 | 0.03449 | 0.07775 | 0.06927 | 0.07775 | 0.16065 |
| 0.0934  | 0.07345 | 0.07785 | 0.03477 | 0.07784 | 0.06963 | 0.07784 | 0.16129 |
| 0.09352 | 0.07355 | 0.07795 | 0.03458 | 0.07793 | 0.06963 | 0.07794 | 0.16129 |
| 0.09363 | 0.07363 | 0.07804 | 0.03449 | 0.07803 | 0.06972 | 0.07803 | 0.16146 |
| 0.09374 | 0.07382 | 0.07813 | 0.03486 | 0.07812 | 0.06981 | 0.07812 | 0.1621  |
| 0.09385 | 0.07363 | 0.07822 | 0.03495 | 0.07821 | 0.06981 | 0.07822 | 0.16155 |
| 0.09396 | 0.074   | 0.07831 | 0.03495 | 0.07831 | 0.07008 | 0.07831 | 0.16201 |
| 0.09408 | 0.07382 | 0.07841 | 0.03468 | 0.0784  | 0.07017 | 0.0784  | 0.16229 |
| 0.09418 | 0.07409 | 0.0785  | 0.03477 | 0.07849 | 0.07063 | 0.07849 | 0.16246 |
| 0.0943  | 0.07436 | 0.07859 | 0.03495 | 0.07858 | 0.07036 | 0.07859 | 0.16301 |
| 0.09441 | 0.07436 | 0.07868 | 0.03523 | 0.07868 | 0.07054 | 0.07868 | 0.16319 |
| 0.09452 | 0.07455 | 0.07878 | 0.03531 | 0.07877 | 0.07081 | 0.07877 | 0.16347 |
| 0.09463 | 0.075   | 0.07887 | 0.03523 | 0.07886 | 0.07063 | 0.07887 | 0.16374 |
| 0.09474 | 0.07509 | 0.07896 | 0.03513 | 0.07896 | 0.07063 | 0.07896 | 0.1642  |
| 0.09485 | 0.07473 | 0.07906 | 0.0354  | 0.07904 | 0.071   | 0.07905 | 0.16447 |
| 0.09497 | 0.07481 | 0.07915 | 0.0354  | 0.07914 | 0.07118 | 0.07914 | 0.16474 |
| 0.09507 | 0.07509 | 0.07924 | 0.03531 | 0.07924 | 0.07154 | 0.07924 | 0.16528 |
| 0.09519 | 0.075   | 0.07933 | 0.0355  | 0.07932 | 0.07145 | 0.07933 | 0.16556 |
| 0.0953  | 0.07518 | 0.07943 | 0.03577 | 0.07942 | 0.07126 | 0.07942 | 0.16583 |
| 0.09541 | 0.07536 | 0.07952 | 0.03577 | 0.07951 | 0.07136 | 0.07952 | 0.16592 |
| 0.09552 | 0.07545 | 0.07961 | 0.03577 | 0.0796  | 0.07163 | 0.0796  | 0.16647 |
| 0.09563 | 0.07573 | 0.07971 | 0.03586 | 0.07969 | 0.07154 | 0.0797  | 0.16647 |
| 0.09575 | 0.07609 | 0.07979 | 0.03577 | 0.07979 | 0.07199 | 0.07979 | 0.16674 |
| 0.09585 | 0.07609 | 0.07989 | 0.03595 | 0.07988 | 0.07199 | 0.07988 | 0.16711 |
| 0.09597 | 0.07591 | 0.07998 | 0.03623 | 0.07997 | 0.07226 | 0.07998 | 0.16766 |
| 0.09607 | 0.07591 | 0.08007 | 0.03623 | 0.08007 | 0.07245 | 0.08007 | 0.16748 |
| 0.09619 | 0.07627 | 0.08017 | 0.03623 | 0.08016 | 0.07245 | 0.08016 | 0.16775 |
| 0.0963  | 0.07646 | 0.08026 | 0.03659 | 0.08025 | 0.07263 | 0.08025 | 0.16838 |
| 0.09641 | 0.07627 | 0.08035 | 0.03668 | 0.08034 | 0.07282 | 0.08035 | 0.16874 |



|         |         |         |         |         |         |         |         |
|---------|---------|---------|---------|---------|---------|---------|---------|
| 0.09652 | 0.07646 | 0.08044 | 0.03686 | 0.08044 | 0.07309 | 0.08044 | 0.16883 |
| 0.09663 | 0.07673 | 0.08054 | 0.03659 | 0.08053 | 0.0729  | 0.08053 | 0.1692  |
| 0.09674 | 0.07673 | 0.08063 | 0.03659 | 0.08062 | 0.0729  | 0.08063 | 0.1693  |
| 0.09685 | 0.07673 | 0.08072 | 0.03677 | 0.08072 | 0.07336 | 0.08072 | 0.16974 |
| 0.09696 | 0.0771  | 0.08082 | 0.03668 | 0.0808  | 0.07355 | 0.08081 | 0.16984 |
| 0.09708 | 0.0771  | 0.08091 | 0.03695 | 0.0809  | 0.07373 | 0.0809  | 0.16984 |
| 0.09719 | 0.07719 | 0.081   | 0.03714 | 0.081   | 0.07373 | 0.081   | 0.17002 |
| 0.0973  | 0.07764 | 0.08109 | 0.03732 | 0.08108 | 0.0739  | 0.08108 | 0.17084 |
| 0.09741 | 0.07764 | 0.08118 | 0.03732 | 0.08118 | 0.074   | 0.08118 | 0.17111 |
| 0.09752 | 0.07782 | 0.08128 | 0.03722 | 0.08127 | 0.07436 | 0.08127 | 0.17102 |
| 0.09763 | 0.078   | 0.08137 | 0.03722 | 0.08136 | 0.07436 | 0.08136 | 0.17175 |
| 0.09774 | 0.07791 | 0.08146 | 0.03741 | 0.08145 | 0.07445 | 0.08146 | 0.17184 |
| 0.09786 | 0.07782 | 0.08155 | 0.03732 | 0.08155 | 0.07463 | 0.08155 | 0.17202 |
| 0.09796 | 0.07855 | 0.08165 | 0.0375  | 0.08164 | 0.07463 | 0.08164 | 0.17238 |
| 0.09808 | 0.07873 | 0.08174 | 0.03786 | 0.08173 | 0.07473 | 0.08173 | 0.17257 |
| 0.09818 | 0.07882 | 0.08183 | 0.03786 | 0.08183 | 0.07473 | 0.08183 | 0.17238 |
| 0.0983  | 0.07901 | 0.08193 | 0.03777 | 0.08191 | 0.07491 | 0.08192 | 0.17275 |
| 0.0984  | 0.07901 | 0.08202 | 0.03768 | 0.08201 | 0.07536 | 0.08201 | 0.17312 |
| 0.09852 | 0.07882 | 0.08211 | 0.03786 | 0.0821  | 0.07509 | 0.08211 | 0.17339 |
| 0.09863 | 0.07891 | 0.0822  | 0.03796 | 0.08219 | 0.07518 | 0.08219 | 0.17375 |
| 0.09874 | 0.07882 | 0.0823  | 0.03823 | 0.08229 | 0.075   | 0.08229 | 0.17393 |
| 0.09885 | 0.07909 | 0.08239 | 0.03841 | 0.08238 | 0.07536 | 0.08238 | 0.17439 |
| 0.09896 | 0.07946 | 0.08248 | 0.03813 | 0.08247 | 0.07527 | 0.08247 | 0.17512 |
| 0.09908 | 0.08    | 0.08258 | 0.03805 | 0.08256 | 0.07591 | 0.08257 | 0.17548 |
| 0.09919 | 0.07992 | 0.08267 | 0.03823 | 0.08266 | 0.076   | 0.08266 | 0.17548 |
| 0.0993  | 0.07992 | 0.08276 | 0.0385  | 0.08275 | 0.076   | 0.08275 | 0.17576 |
| 0.09941 | 0.0801  | 0.08285 | 0.03832 | 0.08284 | 0.07627 | 0.08284 | 0.17675 |
| 0.09952 | 0.08028 | 0.08294 | 0.03841 | 0.08294 | 0.07655 | 0.08294 | 0.17639 |
| 0.09963 | 0.08046 | 0.08303 | 0.0385  | 0.08303 | 0.07655 | 0.08303 | 0.17675 |
| 0.09974 | 0.08037 | 0.08313 | 0.03878 | 0.08312 | 0.07682 | 0.08312 | 0.17685 |
| 0.09985 | 0.08028 | 0.08323 | 0.03878 | 0.08321 | 0.07673 | 0.08322 | 0.17703 |
| 0.09997 | 0.08074 | 0.08331 | 0.03895 | 0.08331 | 0.07691 | 0.08331 | 0.17748 |
| 0.10007 | 0.08074 | 0.08341 | 0.03914 | 0.0834  | 0.07718 | 0.0834  | 0.17803 |
| 0.10019 | 0.08091 | 0.0835  | 0.03914 | 0.08349 | 0.07718 | 0.08349 | 0.17803 |
| 0.1003  | 0.0811  | 0.08359 | 0.03914 | 0.08359 | 0.07736 | 0.08359 | 0.1784  |
| 0.10041 | 0.0811  | 0.08368 | 0.03923 | 0.08367 | 0.07736 | 0.08368 | 0.17885 |
| 0.10052 | 0.0811  | 0.08378 | 0.0395  | 0.08377 | 0.07745 | 0.08377 | 0.17894 |
| 0.10063 | 0.081   | 0.08387 | 0.0395  | 0.08386 | 0.07745 | 0.08386 | 0.17894 |
| 0.10075 | 0.08119 | 0.08396 | 0.0395  | 0.08395 | 0.07764 | 0.08395 | 0.17931 |
| 0.10085 | 0.08137 | 0.08406 | 0.0395  | 0.08405 | 0.07773 | 0.08405 | 0.17967 |
| 0.10097 | 0.08128 | 0.08415 | 0.03977 | 0.08414 | 0.07809 | 0.08414 | 0.18022 |
| 0.10107 | 0.08146 | 0.08424 | 0.03977 | 0.08423 | 0.07836 | 0.08423 | 0.18039 |
| 0.10119 | 0.08164 | 0.08433 | 0.03977 | 0.08432 | 0.07828 | 0.08433 | 0.18067 |
| 0.1013  | 0.08191 | 0.08443 | 0.03987 | 0.08442 | 0.07836 | 0.08442 | 0.18058 |
| 0.10141 | 0.08219 | 0.08452 | 0.03987 | 0.08451 | 0.07873 | 0.08451 | 0.18085 |
| 0.10152 | 0.08219 | 0.08461 | 0.03987 | 0.0846  | 0.079   | 0.0846  | 0.1813  |
| 0.10163 | 0.08219 | 0.0847  | 0.04014 | 0.0847  | 0.07909 | 0.0847  | 0.18149 |
| 0.10174 | 0.0821  | 0.08479 | 0.04023 | 0.08479 | 0.07919 | 0.08479 | 0.18185 |
| 0.10185 | 0.0821  | 0.08489 | 0.0405  | 0.08488 | 0.07909 | 0.08488 | 0.18185 |
| 0.10196 | 0.08237 | 0.08498 | 0.04041 | 0.08497 | 0.07919 | 0.08498 | 0.18194 |
| 0.10208 | 0.0821  | 0.08507 | 0.04032 | 0.08506 | 0.07937 | 0.08506 | 0.18231 |
| 0.10219 | 0.08219 | 0.08517 | 0.04041 | 0.08516 | 0.07973 | 0.08516 | 0.18285 |
| 0.1023  | 0.08247 | 0.08526 | 0.04032 | 0.08525 | 0.07982 | 0.08525 | 0.18331 |
| 0.10241 | 0.08256 | 0.08535 | 0.04059 | 0.08535 | 0.07964 | 0.08535 | 0.1834  |

|         |         |         |         |         |         |         |         |
|---------|---------|---------|---------|---------|---------|---------|---------|
| 0.10252 | 0.08283 | 0.08544 | 0.04078 | 0.08543 | 0.07973 | 0.08544 | 0.18395 |
| 0.10263 | 0.08292 | 0.08554 | 0.04078 | 0.08553 | 0.07992 | 0.08553 | 0.18431 |
| 0.10274 | 0.08265 | 0.08563 | 0.04087 | 0.08562 | 0.08037 | 0.08563 | 0.18404 |
| 0.10286 | 0.08283 | 0.08572 | 0.04096 | 0.08571 | 0.08073 | 0.08571 | 0.1844  |
| 0.10296 | 0.08328 | 0.08582 | 0.04105 | 0.08581 | 0.081   | 0.08581 | 0.18504 |
| 0.10308 | 0.08365 | 0.0859  | 0.04087 | 0.0859  | 0.08073 | 0.0859  | 0.1854  |
| 0.10318 | 0.08346 | 0.086   | 0.04114 | 0.08599 | 0.0811  | 0.08599 | 0.18558 |
| 0.1033  | 0.08346 | 0.08609 | 0.04123 | 0.08608 | 0.08118 | 0.08609 | 0.18586 |
| 0.10341 | 0.08374 | 0.08619 | 0.04123 | 0.08618 | 0.08118 | 0.08618 | 0.18595 |
| 0.10352 | 0.08392 | 0.08628 | 0.04142 | 0.08627 | 0.08155 | 0.08627 | 0.18604 |
| 0.10363 | 0.0841  | 0.08637 | 0.04151 | 0.08636 | 0.08174 | 0.08636 | 0.1865  |
| 0.10374 | 0.08392 | 0.08646 | 0.0416  | 0.08646 | 0.08174 | 0.08646 | 0.18686 |
| 0.10385 | 0.08355 | 0.08655 | 0.04196 | 0.08654 | 0.08174 | 0.08654 | 0.18695 |
| 0.10396 | 0.08401 | 0.08665 | 0.04214 | 0.08664 | 0.08137 | 0.08664 | 0.18713 |
| 0.10408 | 0.08419 | 0.08674 | 0.04196 | 0.08673 | 0.08164 | 0.08674 | 0.1875  |
| 0.10419 | 0.08428 | 0.08683 | 0.04196 | 0.08683 | 0.08191 | 0.08683 | 0.18832 |
| 0.1043  | 0.08447 | 0.08693 | 0.04214 | 0.08691 | 0.08201 | 0.08692 | 0.1885  |
| 0.10441 | 0.08465 | 0.08702 | 0.04223 | 0.08701 | 0.08209 | 0.08701 | 0.18904 |
| 0.10452 | 0.08465 | 0.08711 | 0.04233 | 0.0871  | 0.08201 | 0.0871  | 0.18877 |
| 0.10463 | 0.08492 | 0.0872  | 0.04233 | 0.08719 | 0.08191 | 0.0872  | 0.18877 |
| 0.10474 | 0.08519 | 0.0873  | 0.04233 | 0.08729 | 0.08246 | 0.08729 | 0.18931 |
| 0.10485 | 0.08537 | 0.08739 | 0.0425  | 0.08738 | 0.08282 | 0.08738 | 0.1895  |
| 0.10497 | 0.08574 | 0.08748 | 0.04242 | 0.08747 | 0.0831  | 0.08747 | 0.19014 |
| 0.10507 | 0.08565 | 0.08757 | 0.04242 | 0.08757 | 0.08328 | 0.08757 | 0.19086 |
| 0.10519 | 0.08547 | 0.08766 | 0.04259 | 0.08766 | 0.08328 | 0.08766 | 0.19095 |
| 0.1053  | 0.08556 | 0.08776 | 0.04259 | 0.08775 | 0.08337 | 0.08775 | 0.19178 |
| 0.10541 | 0.08592 | 0.08785 | 0.0425  | 0.08784 | 0.08355 | 0.08785 | 0.19241 |
| 0.10552 | 0.0861  | 0.08794 | 0.04259 | 0.08794 | 0.08365 | 0.08794 | 0.19232 |
| 0.10563 | 0.08619 | 0.08804 | 0.04278 | 0.08803 | 0.08392 | 0.08803 | 0.1926  |
| 0.10575 | 0.08638 | 0.08813 | 0.04278 | 0.08812 | 0.0841  | 0.08812 | 0.1925  |
| 0.10585 | 0.08629 | 0.08822 | 0.04278 | 0.08822 | 0.08428 | 0.08822 | 0.19268 |
| 0.10597 | 0.08638 | 0.08831 | 0.04296 | 0.0883  | 0.0841  | 0.0883  | 0.19332 |
| 0.10607 | 0.08638 | 0.08841 | 0.04305 | 0.0884  | 0.08428 | 0.0884  | 0.1935  |
| 0.10619 | 0.08619 | 0.0885  | 0.04314 | 0.08849 | 0.08428 | 0.08849 | 0.19396 |
| 0.10629 | 0.08647 | 0.08859 | 0.04314 | 0.08858 | 0.08456 | 0.08858 | 0.19433 |
| 0.10641 | 0.08683 | 0.08869 | 0.04314 | 0.08867 | 0.08473 | 0.08868 | 0.19433 |
| 0.10652 | 0.08665 | 0.08878 | 0.04324 | 0.08877 | 0.08473 | 0.08877 | 0.19433 |
| 0.10663 | 0.08665 | 0.08887 | 0.0436  | 0.08887 | 0.08519 | 0.08886 | 0.19505 |
| 0.10674 | 0.08683 | 0.08896 | 0.04369 | 0.08895 | 0.08537 | 0.08896 | 0.19533 |
| 0.10685 | 0.08728 | 0.08906 | 0.04387 | 0.08905 | 0.08546 | 0.08905 | 0.19523 |
| 0.10696 | 0.08738 | 0.08915 | 0.04369 | 0.08914 | 0.08583 | 0.08914 | 0.19542 |
| 0.10708 | 0.08756 | 0.08924 | 0.04369 | 0.08923 | 0.08574 | 0.08923 | 0.1956  |
| 0.10719 | 0.08765 | 0.08934 | 0.04396 | 0.08933 | 0.08592 | 0.08933 | 0.19587 |
| 0.1073  | 0.08774 | 0.08942 | 0.04414 | 0.08942 | 0.08601 | 0.08942 | 0.19587 |
| 0.10741 | 0.08793 | 0.08952 | 0.04424 | 0.08951 | 0.08619 | 0.08951 | 0.19578 |
| 0.10752 | 0.08811 | 0.08961 | 0.04432 | 0.0896  | 0.08637 | 0.08961 | 0.19624 |
| 0.10763 | 0.08811 | 0.0897  | 0.0446  | 0.0897  | 0.08683 | 0.0897  | 0.19678 |
| 0.10774 | 0.08819 | 0.0898  | 0.0446  | 0.08979 | 0.08683 | 0.08979 | 0.19641 |
| 0.10786 | 0.08847 | 0.08989 | 0.04469 | 0.08988 | 0.08692 | 0.08988 | 0.19696 |
| 0.10796 | 0.08892 | 0.08998 | 0.04478 | 0.08997 | 0.08701 | 0.08997 | 0.1976  |
| 0.10808 | 0.08929 | 0.09007 | 0.04478 | 0.09007 | 0.08756 | 0.09007 | 0.19751 |
| 0.10818 | 0.08892 | 0.09017 | 0.04478 | 0.09016 | 0.08801 | 0.09016 | 0.19815 |
| 0.1083  | 0.08892 | 0.09026 | 0.04487 | 0.09025 | 0.08811 | 0.09025 | 0.19851 |
| 0.1084  | 0.08911 | 0.09035 | 0.04496 | 0.09034 | 0.08838 | 0.09034 | 0.19887 |

|         |         |         |         |         |         |         |         |
|---------|---------|---------|---------|---------|---------|---------|---------|
| 0.10852 | 0.08911 | 0.09045 | 0.04478 | 0.09043 | 0.08828 | 0.09044 | 0.19887 |
| 0.10863 | 0.08956 | 0.09054 | 0.04478 | 0.09053 | 0.08838 | 0.09053 | 0.19924 |
| 0.10874 | 0.08965 | 0.09063 | 0.04515 | 0.09062 | 0.08892 | 0.09062 | 0.19951 |
| 0.10885 | 0.08956 | 0.09072 | 0.04524 | 0.09071 | 0.08865 | 0.09072 | 0.19942 |
| 0.10896 | 0.08993 | 0.09082 | 0.04524 | 0.09081 | 0.08892 | 0.09081 | 0.19969 |
| 0.10908 | 0.09002 | 0.0909  | 0.04542 | 0.0909  | 0.08938 | 0.0909  | 0.20005 |
| 0.10919 | 0.08984 | 0.091   | 0.04551 | 0.09099 | 0.08938 | 0.09099 | 0.20042 |
| 0.1093  | 0.09002 | 0.0911  | 0.04542 | 0.09109 | 0.08947 | 0.09109 | 0.20069 |
| 0.10941 | 0.09057 | 0.09118 | 0.04587 | 0.09118 | 0.08975 | 0.09117 | 0.20061 |
| 0.10952 | 0.09083 | 0.09128 | 0.04587 | 0.09127 | 0.0902  | 0.09127 | 0.20097 |
| 0.10963 | 0.09083 | 0.09137 | 0.04578 | 0.09136 | 0.09038 | 0.09137 | 0.20142 |
| 0.10974 | 0.09093 | 0.09146 | 0.04597 | 0.09146 | 0.09047 | 0.09146 | 0.20178 |
| 0.10985 | 0.09083 | 0.09156 | 0.04614 | 0.09154 | 0.09065 | 0.09155 | 0.20224 |
| 0.10996 | 0.09083 | 0.09165 | 0.04597 | 0.09164 | 0.09065 | 0.09164 | 0.20261 |
| 0.11007 | 0.09138 | 0.09174 | 0.04614 | 0.09173 | 0.09111 | 0.09173 | 0.20279 |
| 0.11019 | 0.09156 | 0.09183 | 0.04606 | 0.09182 | 0.09111 | 0.09182 | 0.20334 |
| 0.1103  | 0.09193 | 0.09193 | 0.04606 | 0.09192 | 0.09138 | 0.09192 | 0.2036  |
| 0.11041 | 0.09193 | 0.09202 | 0.04633 | 0.09201 | 0.09166 | 0.09201 | 0.2036  |
| 0.11052 | 0.09184 | 0.09211 | 0.04633 | 0.0921  | 0.09166 | 0.0921  | 0.20343 |
| 0.11063 | 0.09202 | 0.09221 | 0.04623 | 0.09219 | 0.09193 | 0.0922  | 0.20406 |
| 0.11075 | 0.09211 | 0.09229 | 0.04651 | 0.09229 | 0.09248 | 0.09229 | 0.20388 |
| 0.11085 | 0.09184 | 0.09239 | 0.0466  | 0.09238 | 0.09257 | 0.09238 | 0.2037  |
| 0.11097 | 0.09202 | 0.09248 | 0.04678 | 0.09247 | 0.09293 | 0.09248 | 0.20452 |
| 0.11107 | 0.09229 | 0.09257 | 0.04678 | 0.09257 | 0.0932  | 0.09257 | 0.2046  |
| 0.11119 | 0.09239 | 0.09267 | 0.0467  | 0.09266 | 0.0932  | 0.09266 | 0.20506 |
| 0.1113  | 0.09229 | 0.09276 | 0.04678 | 0.09275 | 0.0932  | 0.09275 | 0.20551 |
| 0.11141 | 0.09266 | 0.09285 | 0.04688 | 0.09285 | 0.09347 | 0.09285 | 0.20579 |
| 0.11152 | 0.09284 | 0.09294 | 0.04688 | 0.09293 | 0.09366 | 0.09293 | 0.20561 |
| 0.11163 | 0.09275 | 0.09304 | 0.04697 | 0.09303 | 0.09402 | 0.09303 | 0.20597 |
| 0.11174 | 0.09293 | 0.09313 | 0.04733 | 0.09312 | 0.0942  | 0.09313 | 0.20643 |
| 0.11185 | 0.09311 | 0.09322 | 0.04742 | 0.09321 | 0.09411 | 0.09321 | 0.20688 |
| 0.11196 | 0.09338 | 0.09332 | 0.04733 | 0.0933  | 0.09456 | 0.09331 | 0.20697 |
| 0.11208 | 0.09347 | 0.09341 | 0.04724 | 0.0934  | 0.09502 | 0.0934  | 0.20716 |
| 0.11219 | 0.09357 | 0.0935  | 0.04751 | 0.0935  | 0.09511 | 0.0935  | 0.20761 |
| 0.1123  | 0.09375 | 0.09359 | 0.0476  | 0.09358 | 0.09539 | 0.09358 | 0.20789 |
| 0.11241 | 0.09393 | 0.09369 | 0.04751 | 0.09368 | 0.09548 | 0.09368 | 0.20798 |
| 0.11252 | 0.09402 | 0.09378 | 0.04751 | 0.09377 | 0.09557 | 0.09377 | 0.20815 |
| 0.11263 | 0.0943  | 0.09387 | 0.04788 | 0.09386 | 0.09593 | 0.09386 | 0.20852 |
| 0.11274 | 0.09448 | 0.09397 | 0.04815 | 0.09395 | 0.09593 | 0.09396 | 0.20879 |
| 0.11286 | 0.09438 | 0.09405 | 0.04796 | 0.09405 | 0.0962  | 0.09405 | 0.20925 |
| 0.11296 | 0.0943  | 0.09415 | 0.04788 | 0.09414 | 0.09648 | 0.09414 | 0.20907 |
| 0.11308 | 0.09484 | 0.09424 | 0.04806 | 0.09423 | 0.09675 | 0.09423 | 0.20952 |
| 0.11318 | 0.09493 | 0.09433 | 0.04824 | 0.09433 | 0.09685 | 0.09433 | 0.20979 |
| 0.1133  | 0.09493 | 0.09443 | 0.04806 | 0.09442 | 0.09702 | 0.09442 | 0.21007 |
| 0.11341 | 0.09511 | 0.09452 | 0.04824 | 0.09451 | 0.09721 | 0.09451 | 0.21043 |
| 0.11352 | 0.09511 | 0.09461 | 0.04833 | 0.09461 | 0.09739 | 0.09461 | 0.21035 |
| 0.11363 | 0.09548 | 0.0947  | 0.04842 | 0.0947  | 0.09748 | 0.0947  | 0.21144 |
| 0.11374 | 0.09594 | 0.0948  | 0.04869 | 0.09479 | 0.09775 | 0.09479 | 0.21144 |
| 0.11385 | 0.09612 | 0.09489 | 0.04869 | 0.09488 | 0.09775 | 0.09488 | 0.21153 |
| 0.11396 | 0.09603 | 0.09498 | 0.0486  | 0.09498 | 0.0983  | 0.09498 | 0.2118  |
| 0.11408 | 0.09584 | 0.09508 | 0.04842 | 0.09506 | 0.09857 | 0.09507 | 0.21198 |
| 0.11419 | 0.09566 | 0.09517 | 0.04869 | 0.09516 | 0.09848 | 0.09516 | 0.21226 |
| 0.1143  | 0.09566 | 0.09526 | 0.04888 | 0.09525 | 0.09857 | 0.09525 | 0.21252 |
| 0.11441 | 0.09603 | 0.09535 | 0.04906 | 0.09534 | 0.09912 | 0.09534 | 0.21261 |

|         |         |         |         |         |         |         |         |
|---------|---------|---------|---------|---------|---------|---------|---------|
| 0.11452 | 0.0963  | 0.09544 | 0.04933 | 0.09544 | 0.09912 | 0.09544 | 0.21271 |
| 0.11463 | 0.09666 | 0.09554 | 0.04924 | 0.09553 | 0.0993  | 0.09553 | 0.21307 |
| 0.11474 | 0.09721 | 0.09563 | 0.04915 | 0.09562 | 0.09957 | 0.09562 | 0.21353 |
| 0.11485 | 0.09712 | 0.09572 | 0.04933 | 0.09571 | 0.09967 | 0.09572 | 0.21371 |
| 0.11497 | 0.09712 | 0.09581 | 0.04942 | 0.09581 | 0.09984 | 0.09581 | 0.21453 |
| 0.11507 | 0.0973  | 0.09591 | 0.04951 | 0.0959  | 0.09993 | 0.0959  | 0.2148  |
| 0.11519 | 0.09712 | 0.096   | 0.04951 | 0.09599 | 0.10012 | 0.09599 | 0.21444 |
| 0.1153  | 0.09721 | 0.09609 | 0.04951 | 0.09609 | 0.10048 | 0.09609 | 0.2148  |
| 0.11541 | 0.09721 | 0.09618 | 0.04988 | 0.09617 | 0.10085 | 0.09618 | 0.21562 |
| 0.11552 | 0.0973  | 0.09628 | 0.05015 | 0.09627 | 0.10121 | 0.09627 | 0.21553 |
| 0.11563 | 0.09766 | 0.09637 | 0.05006 | 0.09636 | 0.1014  | 0.09637 | 0.21581 |
| 0.11575 | 0.09775 | 0.09646 | 0.05006 | 0.09646 | 0.10112 | 0.09645 | 0.21562 |
| 0.11585 | 0.09794 | 0.09656 | 0.05015 | 0.09654 | 0.1013  | 0.09655 | 0.21608 |
| 0.11597 | 0.09821 | 0.09664 | 0.05033 | 0.09664 | 0.10185 | 0.09664 | 0.21662 |
| 0.11607 | 0.0983  | 0.09674 | 0.05042 | 0.09673 | 0.10203 | 0.09673 | 0.21653 |
| 0.11619 | 0.0983  | 0.09684 | 0.05042 | 0.09682 | 0.10212 | 0.09683 | 0.2168  |
| 0.1163  | 0.09803 | 0.09692 | 0.0507  | 0.09692 | 0.10239 | 0.09692 | 0.21753 |
| 0.11641 | 0.0983  | 0.09702 | 0.05061 | 0.09701 | 0.10303 | 0.09701 | 0.2178  |
| 0.11652 | 0.09858 | 0.09711 | 0.05051 | 0.0971  | 0.10331 | 0.0971  | 0.2178  |
| 0.11663 | 0.09858 | 0.09721 | 0.05061 | 0.0972  | 0.10312 | 0.0972  | 0.21826 |
| 0.11674 | 0.09884 | 0.09729 | 0.05079 | 0.09729 | 0.10331 | 0.09729 | 0.21844 |
| 0.11685 | 0.09903 | 0.09739 | 0.05088 | 0.09738 | 0.10312 | 0.09738 | 0.21863 |
| 0.11696 | 0.09921 | 0.09748 | 0.05106 | 0.09747 | 0.10358 | 0.09748 | 0.2189  |
| 0.11708 | 0.09957 | 0.09757 | 0.05106 | 0.09756 | 0.10404 | 0.09756 | 0.21899 |
| 0.11719 | 0.09976 | 0.09767 | 0.05106 | 0.09766 | 0.1043  | 0.09766 | 0.21936 |
| 0.1173  | 0.09967 | 0.09776 | 0.05088 | 0.09775 | 0.10467 | 0.09775 | 0.21962 |
| 0.11741 | 0.09967 | 0.09785 | 0.05125 | 0.09784 | 0.10458 | 0.09784 | 0.22008 |
| 0.11752 | 0.09994 | 0.09794 | 0.05133 | 0.09793 | 0.10476 | 0.09794 | 0.2199  |
| 0.11763 | 0.09984 | 0.09804 | 0.05125 | 0.09803 | 0.10522 | 0.09803 | 0.22035 |
| 0.11774 | 0.09994 | 0.09813 | 0.05142 | 0.09812 | 0.10558 | 0.09813 | 0.22044 |
| 0.11786 | 0.10021 | 0.09822 | 0.05133 | 0.09821 | 0.10576 | 0.09821 | 0.22062 |
| 0.11796 | 0.10058 | 0.09832 | 0.05142 | 0.0983  | 0.10603 | 0.09831 | 0.22108 |
| 0.11808 | 0.10066 | 0.09841 | 0.0517  | 0.0984  | 0.10612 | 0.0984  | 0.22154 |
| 0.11818 | 0.10058 | 0.0985  | 0.05179 | 0.09849 | 0.10622 | 0.09849 | 0.22208 |
| 0.1183  | 0.10048 | 0.09859 | 0.0517  | 0.09858 | 0.10658 | 0.09859 | 0.22217 |
| 0.11841 | 0.10075 | 0.09868 | 0.05152 | 0.09868 | 0.10676 | 0.09868 | 0.22226 |
| 0.11852 | 0.10103 | 0.09878 | 0.05161 | 0.09877 | 0.10722 | 0.09877 | 0.22263 |
| 0.11863 | 0.10121 | 0.09887 | 0.05179 | 0.09886 | 0.10731 | 0.09886 | 0.22263 |
| 0.11874 | 0.10121 | 0.09896 | 0.05188 | 0.09896 | 0.1074  | 0.09896 | 0.22263 |
| 0.11885 | 0.1014  | 0.09905 | 0.05188 | 0.09905 | 0.1074  | 0.09905 | 0.22326 |
| 0.11896 | 0.10148 | 0.09915 | 0.05206 | 0.09914 | 0.10776 | 0.09914 | 0.22354 |
| 0.11908 | 0.10158 | 0.09924 | 0.05224 | 0.09923 | 0.10831 | 0.09924 | 0.2239  |
| 0.11919 | 0.10158 | 0.09933 | 0.05197 | 0.09933 | 0.10859 | 0.09933 | 0.22445 |
| 0.1193  | 0.10185 | 0.09943 | 0.05224 | 0.09941 | 0.10894 | 0.09942 | 0.22436 |
| 0.11941 | 0.10221 | 0.09952 | 0.05215 | 0.09951 | 0.10904 | 0.09951 | 0.22472 |
| 0.11952 | 0.10231 | 0.09961 | 0.05215 | 0.09961 | 0.10913 | 0.09961 | 0.22527 |
| 0.11963 | 0.10213 | 0.0997  | 0.05243 | 0.09969 | 0.10967 | 0.0997  | 0.22572 |
| 0.11975 | 0.10249 | 0.0998  | 0.05261 | 0.09979 | 0.10977 | 0.09979 | 0.22581 |
| 0.11985 | 0.10276 | 0.09989 | 0.05261 | 0.09988 | 0.10995 | 0.09988 | 0.22618 |
| 0.11997 | 0.10276 | 0.09998 | 0.05261 | 0.09997 | 0.11022 | 0.09997 | 0.22682 |
| 0.12007 | 0.10322 | 0.10007 | 0.05261 | 0.10006 | 0.11022 | 0.10007 | 0.22627 |
| 0.12019 | 0.10312 | 0.10016 | 0.05261 | 0.10016 | 0.11077 | 0.10016 | 0.22655 |
| 0.1203  | 0.10331 | 0.10026 | 0.05252 | 0.10025 | 0.11095 | 0.10025 | 0.22673 |
| 0.12041 | 0.10376 | 0.10035 | 0.0527  | 0.10034 | 0.11058 | 0.10035 | 0.22718 |

|         |         |         |         |         |         |         |         |
|---------|---------|---------|---------|---------|---------|---------|---------|
| 0.12052 | 0.10376 | 0.10044 | 0.0527  | 0.10044 | 0.11095 | 0.10044 | 0.22763 |
| 0.12063 | 0.10395 | 0.10054 | 0.05307 | 0.10052 | 0.11132 | 0.10053 | 0.22836 |
| 0.12075 | 0.10413 | 0.10063 | 0.05307 | 0.10062 | 0.11158 | 0.10062 | 0.22836 |
| 0.12085 | 0.10385 | 0.10072 | 0.05316 | 0.10072 | 0.11204 | 0.10072 | 0.22836 |
| 0.12097 | 0.10404 | 0.10081 | 0.05316 | 0.10081 | 0.11222 | 0.10081 | 0.22873 |
| 0.12107 | 0.10485 | 0.10091 | 0.05307 | 0.1009  | 0.1125  | 0.1009  | 0.22909 |
| 0.12119 | 0.10467 | 0.101   | 0.05297 | 0.10099 | 0.11231 | 0.101   | 0.22946 |
| 0.1213  | 0.10513 | 0.10109 | 0.05325 | 0.10108 | 0.11241 | 0.10108 | 0.2301  |
| 0.12141 | 0.10559 | 0.10119 | 0.05325 | 0.10118 | 0.11286 | 0.10118 | 0.23    |
| 0.12152 | 0.10576 | 0.10127 | 0.05333 | 0.10127 | 0.11305 | 0.10127 | 0.23    |
| 0.12163 | 0.10559 | 0.10137 | 0.0537  | 0.10137 | 0.11341 | 0.10136 | 0.23018 |
| 0.12174 | 0.10586 | 0.10146 | 0.05352 | 0.10145 | 0.11368 | 0.10146 | 0.23073 |
| 0.12185 | 0.10613 | 0.10155 | 0.05342 | 0.10155 | 0.11368 | 0.10155 | 0.231   |
| 0.12196 | 0.10658 | 0.10165 | 0.0537  | 0.10164 | 0.11405 | 0.10164 | 0.23127 |
| 0.12208 | 0.10676 | 0.10174 | 0.0537  | 0.10173 | 0.1145  | 0.10173 | 0.23145 |
| 0.12219 | 0.10685 | 0.10184 | 0.0537  | 0.10183 | 0.11459 | 0.10183 | 0.23155 |
| 0.1223  | 0.1074  | 0.10192 | 0.0537  | 0.10192 | 0.11477 | 0.10192 | 0.2321  |
| 0.12241 | 0.1074  | 0.10202 | 0.0537  | 0.10201 | 0.11513 | 0.10201 | 0.23273 |
| 0.12252 | 0.1074  | 0.10211 | 0.05333 | 0.1021  | 0.11523 | 0.10211 | 0.23283 |
| 0.12263 | 0.1075  | 0.1022  | 0.05352 | 0.1022  | 0.11586 | 0.1022  | 0.23318 |
| 0.12274 | 0.10776 | 0.1023  | 0.05352 | 0.10228 | 0.11641 | 0.10229 | 0.23328 |
| 0.12286 | 0.10822 | 0.10239 | 0.05342 | 0.10238 | 0.11669 | 0.10238 | 0.23337 |
| 0.12296 | 0.10822 | 0.10248 | 0.05352 | 0.10247 | 0.11669 | 0.10247 | 0.23392 |
| 0.12308 | 0.10831 | 0.10257 | 0.05361 | 0.10256 | 0.11696 | 0.10257 | 0.23437 |
| 0.12318 | 0.10841 | 0.10267 | 0.05361 | 0.10266 | 0.11723 | 0.10266 | 0.23446 |
| 0.1233  | 0.10868 | 0.10276 | 0.05389 | 0.10275 | 0.1175  | 0.10276 | 0.23519 |
| 0.12341 | 0.10904 | 0.10285 | 0.05389 | 0.10284 | 0.11768 | 0.10284 | 0.23456 |
| 0.12352 | 0.10913 | 0.10295 | 0.0537  | 0.10294 | 0.11768 | 0.10294 | 0.2341  |
| 0.12363 | 0.10904 | 0.10304 | 0.05361 | 0.10303 | 0.11823 | 0.10303 | 0.2351  |
| 0.12374 | 0.10931 | 0.10313 | 0.05397 | 0.10312 | 0.11823 | 0.10312 | 0.23564 |
| 0.12385 | 0.10949 | 0.10322 | 0.05379 | 0.10321 | 0.11823 | 0.10322 | 0.23555 |
| 0.12396 | 0.10995 | 0.10331 | 0.05379 | 0.10331 | 0.11887 | 0.10331 | 0.23573 |
| 0.12408 | 0.11023 | 0.10341 | 0.05389 | 0.1034  | 0.11914 | 0.1034  | 0.23573 |
| 0.12419 | 0.1104  | 0.1035  | 0.05389 | 0.10349 | 0.11933 | 0.10349 | 0.2361  |
| 0.1243  | 0.11032 | 0.10359 | 0.05407 | 0.10358 | 0.11978 | 0.10359 | 0.23683 |
| 0.12441 | 0.11068 | 0.10368 | 0.05407 | 0.10368 | 0.12014 | 0.10368 | 0.23719 |
| 0.12452 | 0.11086 | 0.10378 | 0.05407 | 0.10377 | 0.12023 | 0.10377 | 0.23747 |
| 0.12463 | 0.11086 | 0.10387 | 0.05397 | 0.10386 | 0.12051 | 0.10387 | 0.23765 |
| 0.12474 | 0.11104 | 0.10396 | 0.05434 | 0.10396 | 0.12069 | 0.10396 | 0.23765 |
| 0.12485 | 0.11113 | 0.10406 | 0.05389 | 0.10405 | 0.12096 | 0.10405 | 0.23792 |
| 0.12497 | 0.11132 | 0.10415 | 0.05389 | 0.10414 | 0.12114 | 0.10414 | 0.23856 |
| 0.12507 | 0.1115  | 0.10424 | 0.05397 | 0.10424 | 0.12141 | 0.10424 | 0.23874 |
| 0.12519 | 0.1115  | 0.10433 | 0.05415 | 0.10432 | 0.12123 | 0.10433 | 0.23892 |
| 0.1253  | 0.11141 | 0.10443 | 0.05397 | 0.10442 | 0.12196 | 0.10442 | 0.23928 |
| 0.12541 | 0.11186 | 0.10451 | 0.05379 | 0.10451 | 0.12224 | 0.10451 | 0.23911 |
| 0.12552 | 0.11259 | 0.10461 | 0.05397 | 0.1046  | 0.12224 | 0.1046  | 0.23965 |
| 0.12563 | 0.11241 | 0.10471 | 0.05415 | 0.1047  | 0.12251 | 0.1047  | 0.24029 |
| 0.12575 | 0.1125  | 0.1048  | 0.05425 | 0.10479 | 0.12287 | 0.10479 | 0.24011 |
| 0.12585 | 0.11259 | 0.10489 | 0.05397 | 0.10488 | 0.12324 | 0.10488 | 0.2402  |
| 0.12597 | 0.11259 | 0.10498 | 0.05389 | 0.10497 | 0.12333 | 0.10497 | 0.24074 |
| 0.12607 | 0.11305 | 0.10507 | 0.05397 | 0.10507 | 0.12379 | 0.10507 | 0.24101 |
| 0.12619 | 0.11305 | 0.10517 | 0.05434 | 0.10515 | 0.12396 | 0.10516 | 0.24147 |
| 0.12629 | 0.11341 | 0.10526 | 0.05397 | 0.10525 | 0.12424 | 0.10525 | 0.24211 |
| 0.12641 | 0.11377 | 0.10535 | 0.05397 | 0.10534 | 0.1246  | 0.10535 | 0.2422  |

|         |         |         |         |         |         |         |         |
|---------|---------|---------|---------|---------|---------|---------|---------|
| 0.12652 | 0.11432 | 0.10544 | 0.05434 | 0.10544 | 0.1247  | 0.10544 | 0.24229 |
| 0.12663 | 0.11423 | 0.10554 | 0.05415 | 0.10553 | 0.12479 | 0.10553 | 0.24256 |
| 0.12674 | 0.11432 | 0.10563 | 0.05379 | 0.10562 | 0.12524 | 0.10563 | 0.24266 |
| 0.12685 | 0.11432 | 0.10572 | 0.05415 | 0.10571 | 0.12561 | 0.10571 | 0.2432  |
| 0.12696 | 0.1145  | 0.10582 | 0.05415 | 0.1058  | 0.12597 | 0.10581 | 0.24338 |
| 0.12708 | 0.11468 | 0.10591 | 0.05389 | 0.1059  | 0.12642 | 0.1059  | 0.24365 |
| 0.12719 | 0.11496 | 0.106   | 0.05397 | 0.10599 | 0.12624 | 0.10599 | 0.2442  |
| 0.1273  | 0.11496 | 0.10609 | 0.05389 | 0.10608 | 0.1266  | 0.10609 | 0.24475 |
| 0.12741 | 0.11523 | 0.10618 | 0.05379 | 0.10618 | 0.12706 | 0.10618 | 0.24465 |
| 0.12752 | 0.11551 | 0.10628 | 0.05397 | 0.10627 | 0.12733 | 0.10627 | 0.24493 |
| 0.12763 | 0.11577 | 0.10637 | 0.05407 | 0.10636 | 0.12788 | 0.10636 | 0.24475 |
| 0.12774 | 0.11577 | 0.10647 | 0.05407 | 0.10645 | 0.12779 | 0.10646 | 0.24493 |
| 0.12786 | 0.11586 | 0.10655 | 0.05407 | 0.10655 | 0.12788 | 0.10655 | 0.24557 |
| 0.12796 | 0.11614 | 0.10665 | 0.05407 | 0.10664 | 0.12833 | 0.10664 | 0.24593 |
| 0.12808 | 0.11623 | 0.10674 | 0.05415 | 0.10673 | 0.12852 | 0.10674 | 0.24602 |
| 0.12818 | 0.1165  | 0.10683 | 0.05425 | 0.10683 | 0.12879 | 0.10683 | 0.24629 |
| 0.1283  | 0.11678 | 0.10693 | 0.05407 | 0.10691 | 0.12934 | 0.10692 | 0.24675 |
| 0.12841 | 0.11696 | 0.10702 | 0.05397 | 0.10701 | 0.12961 | 0.10701 | 0.24693 |
| 0.12852 | 0.11696 | 0.10711 | 0.05415 | 0.1071  | 0.12979 | 0.10711 | 0.24721 |
| 0.12863 | 0.11696 | 0.1072  | 0.05443 | 0.10719 | 0.13043 | 0.10719 | 0.24803 |
| 0.12874 | 0.11724 | 0.1073  | 0.05452 | 0.10729 | 0.13061 | 0.10729 | 0.24793 |
| 0.12885 | 0.11741 | 0.10739 | 0.0547  | 0.10738 | 0.13061 | 0.10739 | 0.24803 |
| 0.12896 | 0.11768 | 0.10748 | 0.05461 | 0.10748 | 0.13106 | 0.10748 | 0.24857 |
| 0.12908 | 0.11805 | 0.10758 | 0.0547  | 0.10756 | 0.13143 | 0.10757 | 0.24902 |
| 0.12919 | 0.11805 | 0.10767 | 0.0547  | 0.10766 | 0.13134 | 0.10766 | 0.24948 |
| 0.1293  | 0.11823 | 0.10776 | 0.05497 | 0.10775 | 0.13161 | 0.10775 | 0.24948 |
| 0.12941 | 0.1185  | 0.10785 | 0.05497 | 0.10784 | 0.13161 | 0.10784 | 0.24948 |
| 0.12952 | 0.11833 | 0.10794 | 0.05488 | 0.10794 | 0.13216 | 0.10794 | 0.24966 |
| 0.12963 | 0.11842 | 0.10804 | 0.05488 | 0.10803 | 0.13271 | 0.10803 | 0.25003 |
| 0.12974 | 0.11869 | 0.10813 | 0.05534 | 0.10812 | 0.1328  | 0.10812 | 0.25021 |
| 0.12985 | 0.11924 | 0.10822 | 0.05543 | 0.10822 | 0.13307 | 0.10822 | 0.25003 |
| 0.12997 | 0.11942 | 0.10831 | 0.05561 | 0.10831 | 0.13325 | 0.10831 | 0.25066 |
| 0.13007 | 0.11988 | 0.10841 | 0.05561 | 0.1084  | 0.13325 | 0.1084  | 0.25076 |
| 0.13019 | 0.11996 | 0.1085  | 0.05588 | 0.10849 | 0.1338  | 0.10849 | 0.25094 |
| 0.1303  | 0.11978 | 0.10859 | 0.05588 | 0.10859 | 0.13434 | 0.10859 | 0.25139 |
| 0.13041 | 0.12005 | 0.10869 | 0.05588 | 0.10868 | 0.13434 | 0.10868 | 0.25166 |
| 0.13052 | 0.12023 | 0.10878 | 0.05615 | 0.10877 | 0.13443 | 0.10877 | 0.25221 |
| 0.13063 | 0.12032 | 0.10887 | 0.05643 | 0.10886 | 0.1347  | 0.10887 | 0.25258 |
| 0.13075 | 0.12051 | 0.10896 | 0.05634 | 0.10895 | 0.13553 | 0.10895 | 0.25258 |
| 0.13085 | 0.12097 | 0.10906 | 0.05643 | 0.10905 | 0.13589 | 0.10905 | 0.25294 |
| 0.13097 | 0.12114 | 0.10914 | 0.0567  | 0.10914 | 0.13616 | 0.10914 | 0.25339 |
| 0.13107 | 0.12097 | 0.10924 | 0.0567  | 0.10923 | 0.13625 | 0.10923 | 0.25339 |
| 0.13119 | 0.12151 | 0.10934 | 0.0567  | 0.10932 | 0.13653 | 0.10933 | 0.25348 |
| 0.1313  | 0.12169 | 0.10943 | 0.05662 | 0.10942 | 0.13698 | 0.10942 | 0.25367 |
| 0.13141 | 0.1216  | 0.10952 | 0.0568  | 0.10951 | 0.13717 | 0.10951 | 0.25421 |
| 0.13152 | 0.12178 | 0.10961 | 0.0567  | 0.1096  | 0.13744 | 0.1096  | 0.25457 |
| 0.13163 | 0.12178 | 0.10971 | 0.05689 | 0.1097  | 0.13789 | 0.1097  | 0.25485 |
| 0.13174 | 0.12178 | 0.10979 | 0.05725 | 0.10979 | 0.13789 | 0.10979 | 0.25512 |
| 0.13185 | 0.12178 | 0.10989 | 0.05762 | 0.10988 | 0.13808 | 0.10988 | 0.25576 |
| 0.13196 | 0.12196 | 0.10998 | 0.05725 | 0.10997 | 0.13862 | 0.10998 | 0.25594 |
| 0.13208 | 0.12242 | 0.11007 | 0.05725 | 0.11007 | 0.13871 | 0.11007 | 0.25576 |
| 0.13219 | 0.1226  | 0.11017 | 0.05762 | 0.11015 | 0.13889 | 0.11016 | 0.25585 |
| 0.1323  | 0.1226  | 0.11026 | 0.05752 | 0.11025 | 0.13889 | 0.11025 | 0.2564  |
| 0.13241 | 0.12306 | 0.11035 | 0.05752 | 0.11034 | 0.13926 | 0.11034 | 0.25649 |

|         |         |         |         |         |         |         |         |
|---------|---------|---------|---------|---------|---------|---------|---------|
| 0.13252 | 0.12297 | 0.11045 | 0.05771 | 0.11043 | 0.13953 | 0.11044 | 0.25703 |
| 0.13264 | 0.12315 | 0.11054 | 0.05807 | 0.11053 | 0.1398  | 0.11053 | 0.25749 |
| 0.13274 | 0.12351 | 0.11063 | 0.05816 | 0.11062 | 0.14017 | 0.11062 | 0.25804 |
| 0.13286 | 0.12351 | 0.11072 | 0.05825 | 0.11071 | 0.14026 | 0.11071 | 0.25877 |
| 0.13296 | 0.12379 | 0.11082 | 0.05844 | 0.11081 | 0.1409  | 0.11081 | 0.25858 |
| 0.13308 | 0.12387 | 0.1109  | 0.05835 | 0.1109  | 0.14126 | 0.1109  | 0.25831 |
| 0.13318 | 0.12424 | 0.111   | 0.0587  | 0.11099 | 0.14135 | 0.11099 | 0.25904 |
| 0.1333  | 0.12433 | 0.11109 | 0.05898 | 0.11108 | 0.14172 | 0.11109 | 0.25922 |
| 0.13341 | 0.1247  | 0.11119 | 0.05934 | 0.11118 | 0.14198 | 0.11118 | 0.25913 |
| 0.13352 | 0.12451 | 0.11128 | 0.05962 | 0.11127 | 0.14226 | 0.11127 | 0.25949 |
| 0.13363 | 0.12461 | 0.11137 | 0.05953 | 0.11136 | 0.14254 | 0.11136 | 0.26013 |
| 0.13374 | 0.12497 | 0.11146 | 0.05962 | 0.11146 | 0.14299 | 0.11146 | 0.26031 |
| 0.13385 | 0.12515 | 0.11155 | 0.05953 | 0.11154 | 0.14326 | 0.11154 | 0.26076 |
| 0.13397 | 0.12533 | 0.11165 | 0.05971 | 0.11164 | 0.14371 | 0.11164 | 0.26067 |
| 0.13408 | 0.12524 | 0.11174 | 0.05989 | 0.11173 | 0.1439  | 0.11174 | 0.26113 |
| 0.13419 | 0.12542 | 0.11183 | 0.06016 | 0.11182 | 0.14417 | 0.11182 | 0.2614  |
| 0.1343  | 0.12597 | 0.11193 | 0.06016 | 0.11191 | 0.1449  | 0.11192 | 0.26195 |
| 0.13441 | 0.12606 | 0.11202 | 0.06035 | 0.11201 | 0.14518 | 0.11201 | 0.26204 |
| 0.13452 | 0.12597 | 0.11211 | 0.06025 | 0.11211 | 0.14526 | 0.11211 | 0.26258 |
| 0.13463 | 0.12625 | 0.1122  | 0.06044 | 0.11219 | 0.14545 | 0.1122  | 0.26286 |
| 0.13475 | 0.12643 | 0.1123  | 0.06062 | 0.11229 | 0.14554 | 0.11229 | 0.2624  |
| 0.13485 | 0.12634 | 0.11239 | 0.06071 | 0.11238 | 0.1459  | 0.11239 | 0.26267 |
| 0.13497 | 0.12643 | 0.11248 | 0.06098 | 0.11247 | 0.14609 | 0.11247 | 0.2634  |
| 0.13507 | 0.12669 | 0.11258 | 0.06089 | 0.11257 | 0.14636 | 0.11257 | 0.26359 |
| 0.13519 | 0.12724 | 0.11266 | 0.06108 | 0.11266 | 0.14663 | 0.11266 | 0.26359 |
| 0.1353  | 0.12724 | 0.11276 | 0.06143 | 0.11275 | 0.14708 | 0.11275 | 0.26395 |
| 0.13541 | 0.12724 | 0.11285 | 0.0618  | 0.11284 | 0.14708 | 0.11285 | 0.26423 |
| 0.13552 | 0.12779 | 0.11294 | 0.06171 | 0.11294 | 0.14745 | 0.11294 | 0.26504 |
| 0.13563 | 0.12779 | 0.11304 | 0.06171 | 0.11303 | 0.14799 | 0.11303 | 0.26568 |
| 0.13575 | 0.12761 | 0.11313 | 0.06207 | 0.11312 | 0.14799 | 0.11312 | 0.26577 |
| 0.13585 | 0.1277  | 0.11322 | 0.06226 | 0.11322 | 0.14836 | 0.11322 | 0.26568 |
| 0.13597 | 0.12788 | 0.11331 | 0.06244 | 0.11331 | 0.14873 | 0.11331 | 0.26605 |
| 0.13607 | 0.12833 | 0.11341 | 0.06253 | 0.1134  | 0.14891 | 0.1134  | 0.26668 |
| 0.13619 | 0.12824 | 0.1135  | 0.06235 | 0.11349 | 0.14945 | 0.11349 | 0.26678 |
| 0.1363  | 0.12843 | 0.11359 | 0.06244 | 0.11358 | 0.14954 | 0.11358 | 0.26687 |
| 0.13641 | 0.1287  | 0.11369 | 0.06271 | 0.11367 | 0.14954 | 0.11368 | 0.26696 |
| 0.13652 | 0.1287  | 0.11378 | 0.06307 | 0.11377 | 0.14999 | 0.11377 | 0.26705 |
| 0.13663 | 0.1287  | 0.11387 | 0.06299 | 0.11386 | 0.15045 | 0.11386 | 0.26787 |
| 0.13674 | 0.12907 | 0.11396 | 0.06307 | 0.11395 | 0.15045 | 0.11396 | 0.26823 |
| 0.13685 | 0.12915 | 0.11406 | 0.06326 | 0.11405 | 0.15054 | 0.11405 | 0.26841 |
| 0.13696 | 0.12915 | 0.11415 | 0.06335 | 0.11414 | 0.15109 | 0.11414 | 0.26877 |
| 0.13708 | 0.12943 | 0.11424 | 0.06353 | 0.11423 | 0.15164 | 0.11423 | 0.26841 |
| 0.13719 | 0.12989 | 0.11434 | 0.0638  | 0.11433 | 0.15155 | 0.11433 | 0.26868 |
| 0.1373  | 0.12998 | 0.11442 | 0.06371 | 0.11442 | 0.15155 | 0.11442 | 0.26923 |
| 0.13741 | 0.13007 | 0.11452 | 0.06371 | 0.11451 | 0.152   | 0.11451 | 0.26932 |
| 0.13752 | 0.13015 | 0.11461 | 0.06417 | 0.1146  | 0.15218 | 0.11461 | 0.2695  |
| 0.13763 | 0.13025 | 0.1147  | 0.06417 | 0.1147  | 0.15264 | 0.1147  | 0.27023 |
| 0.13774 | 0.13052 | 0.1148  | 0.06435 | 0.11478 | 0.15273 | 0.11479 | 0.27033 |
| 0.13786 | 0.13061 | 0.11489 | 0.06435 | 0.11488 | 0.15282 | 0.11488 | 0.2705  |
| 0.13796 | 0.13088 | 0.11498 | 0.06426 | 0.11497 | 0.15346 | 0.11497 | 0.27078 |
| 0.13808 | 0.13116 | 0.11507 | 0.06453 | 0.11507 | 0.15354 | 0.11507 | 0.27114 |
| 0.13818 | 0.13134 | 0.11517 | 0.06462 | 0.11516 | 0.15428 | 0.11516 | 0.27141 |
| 0.1383  | 0.13152 | 0.11526 | 0.06481 | 0.11525 | 0.15464 | 0.11525 | 0.27196 |
| 0.1384  | 0.13171 | 0.11535 | 0.06508 | 0.11534 | 0.15482 | 0.11534 | 0.27233 |

|         |         |         |         |         |         |         |         |
|---------|---------|---------|---------|---------|---------|---------|---------|
| 0.13852 | 0.13197 | 0.11545 | 0.06499 | 0.11543 | 0.15491 | 0.11544 | 0.27251 |
| 0.13863 | 0.13216 | 0.11553 | 0.06499 | 0.11553 | 0.15537 | 0.11553 | 0.2726  |
| 0.13874 | 0.13234 | 0.11563 | 0.06526 | 0.11562 | 0.15573 | 0.11562 | 0.27305 |
| 0.13885 | 0.13243 | 0.11572 | 0.06535 | 0.11571 | 0.15592 | 0.11572 | 0.27314 |
| 0.13896 | 0.13252 | 0.11582 | 0.06526 | 0.11581 | 0.15637 | 0.11581 | 0.27378 |
| 0.13908 | 0.13271 | 0.11591 | 0.06562 | 0.1159  | 0.15637 | 0.1159  | 0.27406 |
| 0.13919 | 0.1328  | 0.116   | 0.06581 | 0.11599 | 0.15701 | 0.11599 | 0.27397 |
| 0.1393  | 0.13316 | 0.11609 | 0.06562 | 0.11609 | 0.15728 | 0.11609 | 0.27451 |
| 0.13941 | 0.13371 | 0.11618 | 0.06572 | 0.11618 | 0.15764 | 0.11617 | 0.2746  |
| 0.13952 | 0.13352 | 0.11628 | 0.06608 | 0.11627 | 0.15774 | 0.11627 | 0.27497 |
| 0.13963 | 0.13352 | 0.11637 | 0.06617 | 0.11636 | 0.1581  | 0.11637 | 0.27551 |
| 0.13974 | 0.13398 | 0.11646 | 0.06626 | 0.11645 | 0.15828 | 0.11645 | 0.27578 |
| 0.13985 | 0.13425 | 0.11656 | 0.06626 | 0.11654 | 0.15828 | 0.11655 | 0.27588 |
| 0.13997 | 0.13435 | 0.11665 | 0.06635 | 0.11664 | 0.15891 | 0.11664 | 0.27661 |
| 0.14007 | 0.13425 | 0.11674 | 0.06662 | 0.11674 | 0.15891 | 0.11674 | 0.27624 |
| 0.14019 | 0.13461 | 0.11683 | 0.0669  | 0.11682 | 0.15947 | 0.11682 | 0.27661 |
| 0.1403  | 0.13461 | 0.11693 | 0.06681 | 0.11692 | 0.15974 | 0.11692 | 0.27715 |
| 0.14041 | 0.13489 | 0.11702 | 0.0669  | 0.11701 | 0.15992 | 0.11702 | 0.27687 |
| 0.14052 | 0.13489 | 0.11711 | 0.06699 | 0.1171  | 0.16028 | 0.1171  | 0.27733 |
| 0.14063 | 0.13507 | 0.11721 | 0.06708 | 0.11719 | 0.15992 | 0.1172  | 0.2776  |
| 0.14075 | 0.13534 | 0.11729 | 0.06708 | 0.11729 | 0.16019 | 0.11729 | 0.27788 |
| 0.14085 | 0.13534 | 0.11739 | 0.06735 | 0.11738 | 0.16101 | 0.11738 | 0.27815 |
| 0.14097 | 0.1358  | 0.11748 | 0.06717 | 0.11747 | 0.1612  | 0.11748 | 0.27851 |
| 0.14107 | 0.13616 | 0.11757 | 0.06735 | 0.11757 | 0.16138 | 0.11757 | 0.27869 |
| 0.14119 | 0.13607 | 0.11767 | 0.06744 | 0.11766 | 0.16183 | 0.11766 | 0.27924 |
| 0.1413  | 0.13625 | 0.11776 | 0.06735 | 0.11775 | 0.1621  | 0.11775 | 0.27924 |
| 0.14141 | 0.13653 | 0.11785 | 0.06753 | 0.11785 | 0.16238 | 0.11785 | 0.2797  |
| 0.14152 | 0.13644 | 0.11794 | 0.0679  | 0.11794 | 0.16265 | 0.11794 | 0.27961 |
| 0.14163 | 0.13671 | 0.11804 | 0.06799 | 0.11803 | 0.16255 | 0.11803 | 0.27988 |
| 0.14174 | 0.13708 | 0.11813 | 0.0679  | 0.11812 | 0.16274 | 0.11813 | 0.28006 |
| 0.14185 | 0.13725 | 0.11822 | 0.06817 | 0.11822 | 0.16329 | 0.11822 | 0.28043 |
| 0.14196 | 0.13708 | 0.11832 | 0.06836 | 0.1183  | 0.16347 | 0.11831 | 0.28079 |
| 0.14208 | 0.13735 | 0.11841 | 0.06836 | 0.1184  | 0.16392 | 0.1184  | 0.28088 |
| 0.14219 | 0.13771 | 0.1185  | 0.06862 | 0.11849 | 0.16429 | 0.11849 | 0.28088 |
| 0.1423  | 0.1379  | 0.11859 | 0.06881 | 0.11858 | 0.16447 | 0.11858 | 0.28133 |
| 0.14241 | 0.13799 | 0.11868 | 0.06899 | 0.11868 | 0.16474 | 0.11868 | 0.28133 |
| 0.14252 | 0.13835 | 0.11878 | 0.06909 | 0.11877 | 0.16493 | 0.11877 | 0.28188 |
| 0.14263 | 0.13826 | 0.11887 | 0.06918 | 0.11886 | 0.16538 | 0.11886 | 0.28243 |
| 0.14274 | 0.13871 | 0.11896 | 0.06918 | 0.11895 | 0.16583 | 0.11896 | 0.28261 |
| 0.14286 | 0.13881 | 0.11905 | 0.06944 | 0.11905 | 0.16592 | 0.11905 | 0.28289 |
| 0.14296 | 0.13871 | 0.11915 | 0.06963 | 0.11914 | 0.16656 | 0.11914 | 0.28334 |
| 0.14308 | 0.13881 | 0.11924 | 0.06954 | 0.11923 | 0.16674 | 0.11924 | 0.28324 |
| 0.14318 | 0.13944 | 0.11933 | 0.06954 | 0.11933 | 0.16702 | 0.11933 | 0.28343 |
| 0.1433  | 0.13944 | 0.11943 | 0.06981 | 0.11941 | 0.16729 | 0.11942 | 0.28361 |
| 0.14341 | 0.13981 | 0.11952 | 0.07027 | 0.11951 | 0.16747 | 0.11951 | 0.28398 |
| 0.14352 | 0.13972 | 0.11961 | 0.07036 | 0.11961 | 0.16793 | 0.11961 | 0.28415 |
| 0.14363 | 0.13989 | 0.1197  | 0.07027 | 0.1197  | 0.16829 | 0.1197  | 0.2847  |
| 0.14374 | 0.14035 | 0.1198  | 0.07036 | 0.11979 | 0.16838 | 0.11979 | 0.28479 |
| 0.14385 | 0.14072 | 0.11989 | 0.07054 | 0.11988 | 0.16857 | 0.11988 | 0.28507 |
| 0.14396 | 0.14072 | 0.11998 | 0.07081 | 0.11998 | 0.16902 | 0.11998 | 0.28534 |
| 0.14408 | 0.14072 | 0.12008 | 0.0709  | 0.12006 | 0.16884 | 0.12007 | 0.28525 |
| 0.14419 | 0.14063 | 0.12016 | 0.07081 | 0.12016 | 0.1692  | 0.12016 | 0.28607 |
| 0.1443  | 0.1409  | 0.12026 | 0.07072 | 0.12025 | 0.16956 | 0.12025 | 0.28625 |
| 0.14441 | 0.14136 | 0.12035 | 0.071   | 0.12034 | 0.1702  | 0.12035 | 0.28661 |



|         |         |         |         |         |         |         |         |
|---------|---------|---------|---------|---------|---------|---------|---------|
| 0.14452 | 0.14163 | 0.12045 | 0.07118 | 0.12044 | 0.17084 | 0.12044 | 0.28707 |
| 0.14463 | 0.14163 | 0.12054 | 0.07136 | 0.12053 | 0.17102 | 0.12053 | 0.28725 |
| 0.14474 | 0.1418  | 0.12063 | 0.07136 | 0.12062 | 0.17102 | 0.12062 | 0.28734 |
| 0.14485 | 0.1419  | 0.12072 | 0.07126 | 0.12071 | 0.17148 | 0.12072 | 0.28789 |
| 0.14497 | 0.14199 | 0.12081 | 0.07136 | 0.12081 | 0.17175 | 0.12081 | 0.28807 |
| 0.14507 | 0.14226 | 0.12091 | 0.07173 | 0.1209  | 0.17193 | 0.1209  | 0.28835 |
| 0.14519 | 0.14271 | 0.121   | 0.07173 | 0.12099 | 0.17202 | 0.121   | 0.28862 |
| 0.1453  | 0.14262 | 0.12109 | 0.07181 | 0.12109 | 0.17266 | 0.12108 | 0.28889 |
| 0.14541 | 0.14271 | 0.12119 | 0.07199 | 0.12117 | 0.17302 | 0.12118 | 0.28934 |
| 0.14552 | 0.14317 | 0.12128 | 0.07209 | 0.12127 | 0.17339 | 0.12127 | 0.28943 |
| 0.14563 | 0.14354 | 0.12137 | 0.07227 | 0.12137 | 0.17366 | 0.12137 | 0.29008 |
| 0.14575 | 0.14326 | 0.12146 | 0.07272 | 0.12146 | 0.17357 | 0.12145 | 0.29053 |
| 0.14585 | 0.14372 | 0.12156 | 0.0729  | 0.12155 | 0.17412 | 0.12155 | 0.29099 |
| 0.14597 | 0.14408 | 0.12165 | 0.0729  | 0.12164 | 0.17421 | 0.12164 | 0.29144 |
| 0.14607 | 0.14381 | 0.12174 | 0.0729  | 0.12173 | 0.17484 | 0.12173 | 0.29171 |
| 0.14619 | 0.14381 | 0.12184 | 0.07282 | 0.12182 | 0.17512 | 0.12183 | 0.29153 |
| 0.1463  | 0.14399 | 0.12192 | 0.07299 | 0.12192 | 0.17539 | 0.12192 | 0.2918  |
| 0.14641 | 0.14445 | 0.12202 | 0.07336 | 0.12201 | 0.17539 | 0.12201 | 0.29199 |
| 0.14652 | 0.14445 | 0.12211 | 0.07318 | 0.1221  | 0.17576 | 0.1221  | 0.29226 |
| 0.14663 | 0.14481 | 0.1222  | 0.07309 | 0.1222  | 0.1763  | 0.1222  | 0.29271 |
| 0.14674 | 0.14499 | 0.12229 | 0.07345 | 0.12229 | 0.1763  | 0.12229 | 0.29298 |
| 0.14685 | 0.14481 | 0.12239 | 0.07373 | 0.12238 | 0.17667 | 0.12238 | 0.29353 |
| 0.14696 | 0.14526 | 0.12248 | 0.07382 | 0.12247 | 0.17712 | 0.12248 | 0.29381 |
| 0.14708 | 0.14581 | 0.12257 | 0.0739  | 0.12257 | 0.1773  | 0.12257 | 0.29353 |
| 0.14719 | 0.14591 | 0.12267 | 0.07418 | 0.12266 | 0.17721 | 0.12266 | 0.29453 |
| 0.1473  | 0.14581 | 0.12276 | 0.074   | 0.12275 | 0.17766 | 0.12275 | 0.29462 |
| 0.14741 | 0.14609 | 0.12285 | 0.07436 | 0.12285 | 0.17775 | 0.12285 | 0.29481 |
| 0.14752 | 0.14627 | 0.12294 | 0.07455 | 0.12293 | 0.17821 | 0.12294 | 0.29544 |
| 0.14764 | 0.14636 | 0.12304 | 0.07473 | 0.12303 | 0.17867 | 0.12303 | 0.29617 |
| 0.14774 | 0.14672 | 0.12313 | 0.07481 | 0.12312 | 0.17894 | 0.12312 | 0.29599 |
| 0.14786 | 0.14708 | 0.12322 | 0.075   | 0.12321 | 0.17912 | 0.12321 | 0.29617 |
| 0.14796 | 0.14718 | 0.12332 | 0.07536 | 0.1233  | 0.17949 | 0.12331 | 0.29681 |
| 0.14808 | 0.1469  | 0.12341 | 0.07536 | 0.1234  | 0.17976 | 0.1234  | 0.29726 |
| 0.14818 | 0.14708 | 0.1235  | 0.07564 | 0.12349 | 0.18022 | 0.12349 | 0.29681 |
| 0.1483  | 0.14727 | 0.12359 | 0.07573 | 0.12358 | 0.18039 | 0.12359 | 0.29735 |
| 0.14841 | 0.14763 | 0.12369 | 0.076   | 0.12368 | 0.18067 | 0.12368 | 0.29754 |
| 0.14852 | 0.1479  | 0.12378 | 0.076   | 0.12377 | 0.18094 | 0.12377 | 0.29809 |
| 0.14863 | 0.14773 | 0.12387 | 0.076   | 0.12386 | 0.18149 | 0.12386 | 0.29845 |
| 0.14874 | 0.14818 | 0.12396 | 0.076   | 0.12396 | 0.18149 | 0.12396 | 0.29854 |
| 0.14885 | 0.14845 | 0.12406 | 0.07637 | 0.12405 | 0.18213 | 0.12405 | 0.29854 |
| 0.14896 | 0.14836 | 0.12415 | 0.07646 | 0.12414 | 0.18222 | 0.12414 | 0.29936 |
| 0.14908 | 0.14891 | 0.12424 | 0.07664 | 0.12423 | 0.18267 | 0.12424 | 0.29954 |
| 0.14919 | 0.14936 | 0.12433 | 0.07673 | 0.12432 | 0.18313 | 0.12432 | 0.29999 |
| 0.1493  | 0.149   | 0.12443 | 0.07673 | 0.12442 | 0.18331 | 0.12442 | 0.30008 |
| 0.14941 | 0.14918 | 0.12452 | 0.07691 | 0.12451 | 0.18322 | 0.12451 | 0.30026 |
| 0.14952 | 0.14964 | 0.12461 | 0.07728 | 0.12461 | 0.18377 | 0.12461 | 0.30072 |
| 0.14963 | 0.15    | 0.1247  | 0.07736 | 0.12469 | 0.18413 | 0.1247  | 0.30063 |
| 0.14975 | 0.14973 | 0.1248  | 0.07745 | 0.12479 | 0.18459 | 0.12479 | 0.30136 |
| 0.14985 | 0.15    | 0.12489 | 0.07764 | 0.12488 | 0.18485 | 0.12489 | 0.30245 |
| 0.14997 | 0.15009 | 0.12498 | 0.07755 | 0.12497 | 0.18513 | 0.12497 | 0.30263 |
| 0.15007 | 0.15018 | 0.12507 | 0.07764 | 0.12507 | 0.18541 | 0.12507 | 0.30272 |
| 0.15019 | 0.15037 | 0.12516 | 0.07791 | 0.12516 | 0.18558 | 0.12516 | 0.3029  |
| 0.1503  | 0.15055 | 0.12526 | 0.07791 | 0.12525 | 0.18622 | 0.12525 | 0.30272 |
| 0.15041 | 0.15072 | 0.12535 | 0.07809 | 0.12534 | 0.18641 | 0.12535 | 0.303   |

|         |         |         |         |         |         |         |         |
|---------|---------|---------|---------|---------|---------|---------|---------|
| 0.15052 | 0.151   | 0.12544 | 0.07818 | 0.12544 | 0.18667 | 0.12544 | 0.30336 |
| 0.15063 | 0.15146 | 0.12554 | 0.07836 | 0.12552 | 0.18695 | 0.12553 | 0.30391 |
| 0.15075 | 0.15164 | 0.12563 | 0.07846 | 0.12562 | 0.18695 | 0.12562 | 0.30382 |
| 0.15085 | 0.15182 | 0.12572 | 0.07846 | 0.12572 | 0.18759 | 0.12572 | 0.30446 |
| 0.15097 | 0.15191 | 0.12581 | 0.07873 | 0.12581 | 0.1875  | 0.12581 | 0.30455 |
| 0.15107 | 0.15209 | 0.12591 | 0.07873 | 0.1259  | 0.18795 | 0.1259  | 0.30473 |
| 0.15119 | 0.15209 | 0.126   | 0.07873 | 0.12599 | 0.18832 | 0.12599 | 0.30555 |
| 0.1513  | 0.15218 | 0.12609 | 0.07901 | 0.12608 | 0.18859 | 0.12608 | 0.30591 |
| 0.15141 | 0.15236 | 0.12619 | 0.07919 | 0.12618 | 0.18923 | 0.12618 | 0.30637 |
| 0.15152 | 0.15246 | 0.12628 | 0.07909 | 0.12627 | 0.1895  | 0.12627 | 0.30646 |
| 0.15163 | 0.15282 | 0.12637 | 0.07909 | 0.12636 | 0.1895  | 0.12636 | 0.30637 |
| 0.15174 | 0.1531  | 0.12646 | 0.07946 | 0.12645 | 0.18959 | 0.12646 | 0.30646 |
| 0.15186 | 0.15319 | 0.12655 | 0.07973 | 0.12655 | 0.18986 | 0.12655 | 0.30727 |
| 0.15196 | 0.15291 | 0.12665 | 0.07982 | 0.12664 | 0.19041 | 0.12664 | 0.30782 |
| 0.15208 | 0.15301 | 0.12674 | 0.08    | 0.12673 | 0.19077 | 0.12673 | 0.30782 |
| 0.15219 | 0.15291 | 0.12684 | 0.08037 | 0.12682 | 0.19086 | 0.12683 | 0.30818 |
| 0.1523  | 0.15346 | 0.12692 | 0.08037 | 0.12692 | 0.19114 | 0.12692 | 0.30864 |
| 0.15241 | 0.15355 | 0.12702 | 0.08046 | 0.12701 | 0.19141 | 0.12701 | 0.30882 |
| 0.15252 | 0.15364 | 0.12711 | 0.08027 | 0.1271  | 0.19204 | 0.12711 | 0.30918 |
| 0.15264 | 0.15401 | 0.1272  | 0.08055 | 0.1272  | 0.19196 | 0.1272  | 0.30928 |
| 0.15274 | 0.15446 | 0.1273  | 0.08074 | 0.12729 | 0.19232 | 0.12729 | 0.30937 |
| 0.15286 | 0.15455 | 0.12739 | 0.08091 | 0.12738 | 0.1925  | 0.12738 | 0.31028 |
| 0.15296 | 0.15464 | 0.12748 | 0.0811  | 0.12748 | 0.19277 | 0.12748 | 0.31101 |
| 0.15308 | 0.15491 | 0.12757 | 0.08155 | 0.12756 | 0.19305 | 0.12757 | 0.31101 |
| 0.15318 | 0.15491 | 0.12767 | 0.08174 | 0.12766 | 0.19341 | 0.12766 | 0.31137 |
| 0.1533  | 0.155   | 0.12776 | 0.08228 | 0.12775 | 0.19396 | 0.12776 | 0.31119 |
| 0.15341 | 0.15509 | 0.12785 | 0.08228 | 0.12784 | 0.19442 | 0.12784 | 0.3111  |
| 0.15352 | 0.15546 | 0.12795 | 0.08219 | 0.12794 | 0.1946  | 0.12794 | 0.31155 |
| 0.15363 | 0.15574 | 0.12803 | 0.08191 | 0.12803 | 0.19478 | 0.12803 | 0.31192 |
| 0.15374 | 0.156   | 0.12813 | 0.08228 | 0.12812 | 0.19496 | 0.12812 | 0.31219 |
| 0.15385 | 0.15628 | 0.12822 | 0.08265 | 0.12821 | 0.19551 | 0.12822 | 0.31256 |
| 0.15396 | 0.15628 | 0.12832 | 0.08273 | 0.12831 | 0.19578 | 0.12831 | 0.31328 |
| 0.15408 | 0.15674 | 0.12841 | 0.08282 | 0.1284  | 0.19578 | 0.1284  | 0.31392 |
| 0.15419 | 0.15683 | 0.1285  | 0.08301 | 0.12849 | 0.19633 | 0.12849 | 0.3142  |
| 0.1543  | 0.15701 | 0.1286  | 0.08301 | 0.12858 | 0.19659 | 0.12859 | 0.31429 |
| 0.15441 | 0.15692 | 0.12868 | 0.08319 | 0.12868 | 0.19705 | 0.12867 | 0.31465 |
| 0.15452 | 0.15746 | 0.12878 | 0.08337 | 0.12877 | 0.19732 | 0.12877 | 0.31501 |
| 0.15463 | 0.15782 | 0.12887 | 0.08346 | 0.12886 | 0.19741 | 0.12887 | 0.31547 |
| 0.15474 | 0.15782 | 0.12896 | 0.08365 | 0.12895 | 0.19741 | 0.12895 | 0.31565 |
| 0.15485 | 0.1581  | 0.12906 | 0.08383 | 0.12904 | 0.19787 | 0.12905 | 0.31583 |
| 0.15497 | 0.1581  | 0.12915 | 0.08383 | 0.12914 | 0.19815 | 0.12914 | 0.31638 |
| 0.15507 | 0.15837 | 0.12924 | 0.08401 | 0.12923 | 0.19824 | 0.12923 | 0.31665 |
| 0.15519 | 0.15837 | 0.12933 | 0.08401 | 0.12932 | 0.19896 | 0.12933 | 0.31683 |
| 0.1553  | 0.15883 | 0.12943 | 0.08392 | 0.12942 | 0.19915 | 0.12942 | 0.31683 |
| 0.15541 | 0.15901 | 0.12952 | 0.08428 | 0.12951 | 0.19942 | 0.12952 | 0.31692 |
| 0.15552 | 0.15892 | 0.12961 | 0.08456 | 0.1296  | 0.20015 | 0.1296  | 0.31729 |
| 0.15563 | 0.1591  | 0.12971 | 0.08456 | 0.1297  | 0.20042 | 0.1297  | 0.31756 |
| 0.15575 | 0.15947 | 0.12979 | 0.08473 | 0.12979 | 0.20033 | 0.12979 | 0.31811 |
| 0.15585 | 0.15992 | 0.12989 | 0.08464 | 0.12988 | 0.20069 | 0.12988 | 0.31865 |
| 0.15597 | 0.15947 | 0.12998 | 0.08464 | 0.12997 | 0.20078 | 0.12998 | 0.31929 |
| 0.15607 | 0.15974 | 0.13007 | 0.08511 | 0.13007 | 0.20097 | 0.13007 | 0.31874 |
| 0.15619 | 0.16047 | 0.13017 | 0.08546 | 0.13015 | 0.20133 | 0.13016 | 0.31938 |
| 0.1563  | 0.16028 | 0.13026 | 0.08574 | 0.13025 | 0.20169 | 0.13025 | 0.31984 |
| 0.15641 | 0.16065 | 0.13035 | 0.08574 | 0.13035 | 0.20197 | 0.13035 | 0.31984 |

|         |         |         |         |         |         |         |         |
|---------|---------|---------|---------|---------|---------|---------|---------|
| 0.15652 | 0.16101 | 0.13044 | 0.08583 | 0.13044 | 0.20269 | 0.13044 | 0.3202  |
| 0.15663 | 0.16092 | 0.13054 | 0.08574 | 0.13053 | 0.20269 | 0.13053 | 0.32075 |
| 0.15674 | 0.16092 | 0.13063 | 0.0861  | 0.13062 | 0.20288 | 0.13063 | 0.32075 |
| 0.15685 | 0.16101 | 0.13072 | 0.08647 | 0.13071 | 0.20324 | 0.13071 | 0.32075 |
| 0.15696 | 0.16129 | 0.13082 | 0.08637 | 0.1308  | 0.20352 | 0.13081 | 0.32129 |
| 0.15708 | 0.16174 | 0.13091 | 0.08637 | 0.1309  | 0.20379 | 0.1309  | 0.32175 |
| 0.15719 | 0.16229 | 0.131   | 0.08674 | 0.13099 | 0.20388 | 0.13099 | 0.32211 |
| 0.1573  | 0.16219 | 0.13109 | 0.08702 | 0.13108 | 0.20415 | 0.13109 | 0.32211 |
| 0.15741 | 0.16238 | 0.13118 | 0.0871  | 0.13118 | 0.2047  | 0.13118 | 0.32256 |
| 0.15752 | 0.16256 | 0.13128 | 0.08738 | 0.13127 | 0.20525 | 0.13127 | 0.3232  |
| 0.15764 | 0.16256 | 0.13137 | 0.08738 | 0.13136 | 0.20542 | 0.13136 | 0.32375 |
| 0.15774 | 0.16265 | 0.13147 | 0.08756 | 0.13146 | 0.20561 | 0.13146 | 0.32329 |
| 0.15786 | 0.16329 | 0.13155 | 0.08765 | 0.13155 | 0.20606 | 0.13155 | 0.32402 |
| 0.15796 | 0.16329 | 0.13165 | 0.08801 | 0.13164 | 0.20616 | 0.13164 | 0.32466 |
| 0.15808 | 0.16356 | 0.13174 | 0.08838 | 0.13173 | 0.20643 | 0.13174 | 0.32466 |
| 0.15818 | 0.16401 | 0.13183 | 0.08829 | 0.13183 | 0.20679 | 0.13183 | 0.32484 |
| 0.1583  | 0.1642  | 0.13193 | 0.08865 | 0.13192 | 0.20697 | 0.13192 | 0.32539 |
| 0.1584  | 0.16438 | 0.13202 | 0.08892 | 0.13201 | 0.20743 | 0.13201 | 0.32576 |
| 0.15852 | 0.16456 | 0.13211 | 0.08884 | 0.13211 | 0.20743 | 0.13211 | 0.32585 |
| 0.15863 | 0.16456 | 0.1322  | 0.08884 | 0.13219 | 0.2078  | 0.13219 | 0.32639 |
| 0.15874 | 0.16501 | 0.1323  | 0.0892  | 0.13229 | 0.20806 | 0.13229 | 0.32639 |
| 0.15885 | 0.1652  | 0.13239 | 0.0892  | 0.13238 | 0.20862 | 0.13239 | 0.32684 |
| 0.15896 | 0.1652  | 0.13248 | 0.08929 | 0.13248 | 0.20898 | 0.13248 | 0.32739 |
| 0.15908 | 0.16547 | 0.13258 | 0.08965 | 0.13256 | 0.20925 | 0.13257 | 0.32785 |
| 0.15919 | 0.16556 | 0.13266 | 0.08975 | 0.13266 | 0.20943 | 0.13266 | 0.3283  |
| 0.1593  | 0.16547 | 0.13276 | 0.08984 | 0.13275 | 0.2097  | 0.13275 | 0.32876 |
| 0.15941 | 0.16556 | 0.13285 | 0.09002 | 0.13284 | 0.20998 | 0.13285 | 0.32903 |
| 0.15952 | 0.16592 | 0.13295 | 0.09002 | 0.13294 | 0.21044 | 0.13294 | 0.32921 |
| 0.15963 | 0.16629 | 0.13304 | 0.0902  | 0.13303 | 0.21053 | 0.13303 | 0.32958 |
| 0.15975 | 0.16665 | 0.13313 | 0.09057 | 0.13312 | 0.21116 | 0.13312 | 0.32976 |
| 0.15985 | 0.16693 | 0.13323 | 0.09065 | 0.13322 | 0.21135 | 0.13322 | 0.33021 |
| 0.15997 | 0.16693 | 0.13331 | 0.09074 | 0.13331 | 0.21144 | 0.13331 | 0.33031 |
| 0.16007 | 0.16702 | 0.13341 | 0.09065 | 0.1334  | 0.21207 | 0.1334  | 0.33048 |
| 0.16019 | 0.16729 | 0.1335  | 0.09083 | 0.13349 | 0.21252 | 0.1335  | 0.33112 |
| 0.1603  | 0.16748 | 0.13359 | 0.09111 | 0.13359 | 0.21252 | 0.13358 | 0.33176 |
| 0.16041 | 0.16757 | 0.13369 | 0.0912  | 0.13367 | 0.21298 | 0.13368 | 0.33185 |
| 0.16052 | 0.16802 | 0.13378 | 0.09129 | 0.13377 | 0.21326 | 0.13377 | 0.33212 |
| 0.16063 | 0.1682  | 0.13387 | 0.09166 | 0.13386 | 0.21344 | 0.13386 | 0.33248 |
| 0.16075 | 0.1682  | 0.13396 | 0.09184 | 0.13396 | 0.2138  | 0.13395 | 0.33221 |
| 0.16085 | 0.16875 | 0.13406 | 0.0922  | 0.13405 | 0.21425 | 0.13405 | 0.33294 |
| 0.16097 | 0.16884 | 0.13415 | 0.09192 | 0.13414 | 0.21444 | 0.13415 | 0.3334  |
| 0.16107 | 0.16884 | 0.13424 | 0.09184 | 0.13423 | 0.21489 | 0.13423 | 0.3334  |
| 0.16119 | 0.16912 | 0.13434 | 0.0922  | 0.13432 | 0.21526 | 0.13433 | 0.33404 |
| 0.1613  | 0.16939 | 0.13442 | 0.09248 | 0.13442 | 0.21535 | 0.13442 | 0.3344  |
| 0.16141 | 0.16956 | 0.13452 | 0.09265 | 0.13451 | 0.21562 | 0.13451 | 0.33504 |
| 0.16152 | 0.17011 | 0.13461 | 0.09274 | 0.1346  | 0.21599 | 0.1346  | 0.33494 |
| 0.16163 | 0.17039 | 0.1347  | 0.09293 | 0.1347  | 0.21626 | 0.1347  | 0.33549 |
| 0.16174 | 0.1702  | 0.13479 | 0.09284 | 0.13479 | 0.21644 | 0.13479 | 0.33604 |
| 0.16185 | 0.17057 | 0.13489 | 0.09274 | 0.13488 | 0.21698 | 0.13488 | 0.3364  |
| 0.16196 | 0.17057 | 0.13498 | 0.09257 | 0.13498 | 0.21689 | 0.13498 | 0.33677 |
| 0.16208 | 0.17057 | 0.13507 | 0.09284 | 0.13507 | 0.21707 | 0.13507 | 0.33713 |
| 0.16219 | 0.17111 | 0.13517 | 0.09302 | 0.13516 | 0.21762 | 0.13516 | 0.33731 |
| 0.1623  | 0.17148 | 0.13526 | 0.09311 | 0.13525 | 0.21808 | 0.13525 | 0.33795 |
| 0.16241 | 0.17139 | 0.13535 | 0.09357 | 0.13534 | 0.21844 | 0.13534 | 0.33786 |

|         |         |         |         |         |         |         |         |
|---------|---------|---------|---------|---------|---------|---------|---------|
| 0.16252 | 0.17202 | 0.13545 | 0.09365 | 0.13543 | 0.2189  | 0.13544 | 0.33804 |
| 0.16263 | 0.17211 | 0.13554 | 0.09384 | 0.13553 | 0.21926 | 0.13553 | 0.33832 |
| 0.16274 | 0.17211 | 0.13563 | 0.0942  | 0.13562 | 0.21953 | 0.13563 | 0.33823 |
| 0.16286 | 0.17211 | 0.13572 | 0.0942  | 0.13571 | 0.2199  | 0.13571 | 0.33904 |
| 0.16296 | 0.1723  | 0.13582 | 0.0942  | 0.13581 | 0.21999 | 0.13581 | 0.33959 |
| 0.16308 | 0.17248 | 0.1359  | 0.0943  | 0.1359  | 0.22008 | 0.1359  | 0.33986 |
| 0.16318 | 0.17302 | 0.136   | 0.09438 | 0.13599 | 0.22035 | 0.13599 | 0.33986 |
| 0.1633  | 0.17321 | 0.1361  | 0.09438 | 0.13608 | 0.22044 | 0.13609 | 0.34022 |
| 0.16341 | 0.1733  | 0.13619 | 0.09456 | 0.13618 | 0.22127 | 0.13618 | 0.34031 |
| 0.16352 | 0.17357 | 0.13628 | 0.09511 | 0.13627 | 0.22163 | 0.13627 | 0.34077 |
| 0.16363 | 0.17357 | 0.13637 | 0.09493 | 0.13636 | 0.22181 | 0.13636 | 0.34113 |
| 0.16374 | 0.17375 | 0.13646 | 0.09502 | 0.13646 | 0.22172 | 0.13646 | 0.34122 |
| 0.16385 | 0.17412 | 0.13655 | 0.09511 | 0.13655 | 0.22235 | 0.13655 | 0.34214 |
| 0.16397 | 0.17475 | 0.13665 | 0.09511 | 0.13664 | 0.22253 | 0.13664 | 0.34232 |
| 0.16408 | 0.17467 | 0.13674 | 0.09566 | 0.13673 | 0.2229  | 0.13674 | 0.34268 |
| 0.16419 | 0.17494 | 0.13683 | 0.09566 | 0.13682 | 0.22335 | 0.13682 | 0.34286 |
| 0.1643  | 0.17512 | 0.13693 | 0.09575 | 0.13691 | 0.22354 | 0.13692 | 0.34359 |
| 0.16441 | 0.17512 | 0.13702 | 0.09603 | 0.13701 | 0.2239  | 0.13701 | 0.34405 |
| 0.16452 | 0.1753  | 0.13711 | 0.09629 | 0.13711 | 0.22427 | 0.13711 | 0.3445  |
| 0.16463 | 0.17539 | 0.13721 | 0.09639 | 0.13719 | 0.22463 | 0.1372  | 0.34487 |
| 0.16475 | 0.17539 | 0.1373  | 0.09639 | 0.13729 | 0.2249  | 0.13729 | 0.3456  |
| 0.16485 | 0.17585 | 0.13739 | 0.0962  | 0.13738 | 0.22527 | 0.13738 | 0.34578 |
| 0.16497 | 0.17621 | 0.13748 | 0.09639 | 0.13747 | 0.22536 | 0.13747 | 0.34614 |
| 0.16507 | 0.17639 | 0.13758 | 0.09685 | 0.13757 | 0.22563 | 0.13757 | 0.34642 |
| 0.16519 | 0.17639 | 0.13766 | 0.09666 | 0.13766 | 0.22618 | 0.13766 | 0.34669 |
| 0.1653  | 0.17621 | 0.13776 | 0.09685 | 0.13775 | 0.22636 | 0.13775 | 0.3476  |
| 0.16541 | 0.17639 | 0.13786 | 0.09702 | 0.13784 | 0.22655 | 0.13785 | 0.34768 |
| 0.16552 | 0.17667 | 0.13794 | 0.0973  | 0.13794 | 0.22664 | 0.13794 | 0.34805 |
| 0.16563 | 0.17703 | 0.13804 | 0.09748 | 0.13803 | 0.22682 | 0.13803 | 0.34823 |
| 0.16575 | 0.17722 | 0.13813 | 0.09766 | 0.13812 | 0.22727 | 0.13812 | 0.3485  |
| 0.16585 | 0.1774  | 0.13822 | 0.09775 | 0.13822 | 0.22763 | 0.13822 | 0.34896 |
| 0.16597 | 0.17785 | 0.13831 | 0.09785 | 0.1383  | 0.228   | 0.13831 | 0.34933 |
| 0.16608 | 0.17785 | 0.13841 | 0.09802 | 0.1384  | 0.22809 | 0.1384  | 0.3496  |
| 0.16619 | 0.17794 | 0.1385  | 0.09821 | 0.13849 | 0.22863 | 0.13849 | 0.35015 |
| 0.1663  | 0.17794 | 0.13859 | 0.09812 | 0.13859 | 0.22882 | 0.13859 | 0.35015 |
| 0.16641 | 0.17812 | 0.13869 | 0.09821 | 0.13868 | 0.22909 | 0.13868 | 0.35042 |
| 0.16652 | 0.17831 | 0.13878 | 0.09857 | 0.13877 | 0.22955 | 0.13877 | 0.35114 |
| 0.16663 | 0.17903 | 0.13887 | 0.09866 | 0.13887 | 0.22946 | 0.13886 | 0.35179 |
| 0.16674 | 0.17949 | 0.13897 | 0.09875 | 0.13895 | 0.22955 | 0.13896 | 0.35206 |
| 0.16686 | 0.1794  | 0.13905 | 0.09884 | 0.13905 | 0.22982 | 0.13905 | 0.35179 |
| 0.16696 | 0.17967 | 0.13915 | 0.09903 | 0.13914 | 0.23036 | 0.13914 | 0.3526  |
| 0.16708 | 0.17986 | 0.13924 | 0.09903 | 0.13923 | 0.231   | 0.13923 | 0.35333 |
| 0.16719 | 0.18012 | 0.13933 | 0.09912 | 0.13933 | 0.2311  | 0.13933 | 0.35333 |
| 0.1673  | 0.18031 | 0.13942 | 0.09939 | 0.13942 | 0.23136 | 0.13942 | 0.3537  |
| 0.16741 | 0.1804  | 0.13952 | 0.09957 | 0.13951 | 0.23191 | 0.13951 | 0.35415 |
| 0.16752 | 0.18077 | 0.13961 | 0.09984 | 0.1396  | 0.23237 | 0.13961 | 0.3546  |
| 0.16764 | 0.18103 | 0.1397  | 0.09994 | 0.1397  | 0.23264 | 0.1397  | 0.35533 |
| 0.16774 | 0.18113 | 0.1398  | 0.10012 | 0.13979 | 0.23291 | 0.13979 | 0.35515 |
| 0.16786 | 0.1814  | 0.13989 | 0.10003 | 0.13988 | 0.23319 | 0.13988 | 0.35588 |
| 0.16796 | 0.18176 | 0.13998 | 0.10021 | 0.13997 | 0.23337 | 0.13997 | 0.3557  |
| 0.16808 | 0.18194 | 0.14007 | 0.10039 | 0.14006 | 0.23355 | 0.14007 | 0.35588 |
| 0.16819 | 0.18194 | 0.14017 | 0.10048 | 0.14016 | 0.23401 | 0.14016 | 0.35624 |
| 0.1683  | 0.18185 | 0.14026 | 0.10066 | 0.14025 | 0.23419 | 0.14026 | 0.3567  |
| 0.16841 | 0.18203 | 0.14035 | 0.10103 | 0.14034 | 0.23465 | 0.14034 | 0.35761 |

|         |         |         |         |         |         |         |         |
|---------|---------|---------|---------|---------|---------|---------|---------|
| 0.16852 | 0.1824  | 0.14045 | 0.10131 | 0.14043 | 0.23501 | 0.14044 | 0.35779 |
| 0.16863 | 0.18276 | 0.14053 | 0.10131 | 0.14053 | 0.23547 | 0.14053 | 0.35825 |
| 0.16874 | 0.18294 | 0.14063 | 0.1014  | 0.14062 | 0.23564 | 0.14062 | 0.35843 |
| 0.16885 | 0.18294 | 0.14072 | 0.10148 | 0.14071 | 0.23591 | 0.14072 | 0.3587  |
| 0.16896 | 0.18313 | 0.14082 | 0.10148 | 0.14081 | 0.2361  | 0.14081 | 0.3587  |
| 0.16908 | 0.1835  | 0.14091 | 0.10148 | 0.1409  | 0.23655 | 0.1409  | 0.35897 |
| 0.16919 | 0.18395 | 0.141   | 0.10203 | 0.14099 | 0.23701 | 0.14099 | 0.35989 |
| 0.1693  | 0.18413 | 0.14109 | 0.10203 | 0.14109 | 0.23729 | 0.14109 | 0.36043 |
| 0.16941 | 0.18413 | 0.14118 | 0.10203 | 0.14118 | 0.2372  | 0.14118 | 0.36016 |
| 0.16952 | 0.18413 | 0.14128 | 0.10203 | 0.14127 | 0.23765 | 0.14127 | 0.36052 |
| 0.16963 | 0.18467 | 0.14137 | 0.10212 | 0.14136 | 0.23792 | 0.14137 | 0.36125 |
| 0.16974 | 0.18486 | 0.14146 | 0.10276 | 0.14146 | 0.2381  | 0.14146 | 0.36143 |
| 0.16985 | 0.18495 | 0.14156 | 0.10294 | 0.14154 | 0.23855 | 0.14155 | 0.36252 |
| 0.16997 | 0.18531 | 0.14165 | 0.10303 | 0.14164 | 0.23865 | 0.14164 | 0.36298 |
| 0.17007 | 0.18541 | 0.14174 | 0.10322 | 0.14174 | 0.23865 | 0.14174 | 0.36334 |
| 0.17019 | 0.18558 | 0.14183 | 0.10322 | 0.14182 | 0.23928 | 0.14183 | 0.3638  |
| 0.1703  | 0.18604 | 0.14193 | 0.10376 | 0.14192 | 0.23946 | 0.14192 | 0.36398 |
| 0.17041 | 0.18622 | 0.14202 | 0.10385 | 0.14201 | 0.23965 | 0.14201 | 0.3648  |
| 0.17052 | 0.18641 | 0.14211 | 0.10376 | 0.1421  | 0.23983 | 0.1421  | 0.36544 |
| 0.17063 | 0.18668 | 0.14221 | 0.10367 | 0.1422  | 0.24038 | 0.1422  | 0.36498 |
| 0.17075 | 0.18704 | 0.1423  | 0.10404 | 0.14229 | 0.24065 | 0.14229 | 0.36489 |
| 0.17085 | 0.18722 | 0.14239 | 0.1044  | 0.14238 | 0.2411  | 0.14238 | 0.36535 |
| 0.17097 | 0.18732 | 0.14249 | 0.10458 | 0.14247 | 0.24147 | 0.14248 | 0.36617 |
| 0.17107 | 0.1875  | 0.14257 | 0.10449 | 0.14257 | 0.24165 | 0.14257 | 0.36644 |
| 0.17119 | 0.18759 | 0.14267 | 0.10458 | 0.14266 | 0.2422  | 0.14266 | 0.36662 |
| 0.1713  | 0.18768 | 0.14276 | 0.10476 | 0.14275 | 0.24247 | 0.14275 | 0.36735 |
| 0.17141 | 0.18805 | 0.14285 | 0.10503 | 0.14285 | 0.24284 | 0.14285 | 0.36716 |
| 0.17152 | 0.18805 | 0.14294 | 0.10494 | 0.14293 | 0.2432  | 0.14293 | 0.36698 |
| 0.17163 | 0.18805 | 0.14304 | 0.10531 | 0.14303 | 0.24338 | 0.14303 | 0.36762 |
| 0.17174 | 0.18859 | 0.14313 | 0.10549 | 0.14312 | 0.24365 | 0.14313 | 0.36808 |
| 0.17185 | 0.18887 | 0.14322 | 0.10531 | 0.14322 | 0.24383 | 0.14322 | 0.36881 |
| 0.17196 | 0.18904 | 0.14332 | 0.10531 | 0.14331 | 0.24402 | 0.14331 | 0.36953 |
| 0.17208 | 0.18932 | 0.14341 | 0.10558 | 0.1434  | 0.24447 | 0.1434  | 0.36989 |
| 0.17219 | 0.18941 | 0.1435  | 0.10576 | 0.1435  | 0.24484 | 0.1435  | 0.37035 |
| 0.1723  | 0.18986 | 0.14359 | 0.10567 | 0.14358 | 0.24511 | 0.14359 | 0.37071 |
| 0.17241 | 0.18995 | 0.14368 | 0.10594 | 0.14368 | 0.24539 | 0.14368 | 0.37035 |
| 0.17252 | 0.19023 | 0.14378 | 0.10586 | 0.14377 | 0.24575 | 0.14377 | 0.37108 |
| 0.17264 | 0.1906  | 0.14387 | 0.10631 | 0.14386 | 0.24593 | 0.14386 | 0.37126 |
| 0.17274 | 0.19096 | 0.14396 | 0.10631 | 0.14395 | 0.24629 | 0.14396 | 0.3718  |
| 0.17286 | 0.19123 | 0.14405 | 0.1064  | 0.14405 | 0.24656 | 0.14405 | 0.37217 |
| 0.17296 | 0.19123 | 0.14415 | 0.10667 | 0.14414 | 0.24693 | 0.14414 | 0.37226 |
| 0.17308 | 0.19169 | 0.14424 | 0.10695 | 0.14423 | 0.24729 | 0.14424 | 0.37299 |
| 0.17318 | 0.19178 | 0.14433 | 0.10704 | 0.14433 | 0.24748 | 0.14433 | 0.37317 |
| 0.1733  | 0.19178 | 0.14443 | 0.10695 | 0.14442 | 0.24766 | 0.14442 | 0.37326 |
| 0.17341 | 0.19214 | 0.14452 | 0.10722 | 0.14451 | 0.24793 | 0.14451 | 0.37345 |
| 0.17352 | 0.19223 | 0.14461 | 0.10759 | 0.14461 | 0.24839 | 0.14461 | 0.37381 |
| 0.17363 | 0.19241 | 0.1447  | 0.10749 | 0.14469 | 0.24839 | 0.1447  | 0.37454 |
| 0.17374 | 0.19287 | 0.1448  | 0.10759 | 0.14479 | 0.24866 | 0.14479 | 0.3749  |
| 0.17385 | 0.19314 | 0.14489 | 0.10785 | 0.14488 | 0.24893 | 0.14489 | 0.37527 |
| 0.17396 | 0.1935  | 0.14498 | 0.10813 | 0.14497 | 0.2492  | 0.14497 | 0.37572 |
| 0.17408 | 0.19378 | 0.14508 | 0.10831 | 0.14506 | 0.24966 | 0.14507 | 0.37582 |
| 0.17419 | 0.19414 | 0.14516 | 0.10813 | 0.14516 | 0.25048 | 0.14516 | 0.37618 |
| 0.1743  | 0.19387 | 0.14526 | 0.10822 | 0.14525 | 0.25067 | 0.14525 | 0.37654 |
| 0.17441 | 0.19396 | 0.14535 | 0.10831 | 0.14534 | 0.25048 | 0.14535 | 0.3769  |

|         |         |         |         |         |         |         |         |
|---------|---------|---------|---------|---------|---------|---------|---------|
| 0.17452 | 0.19442 | 0.14545 | 0.10859 | 0.14544 | 0.25048 | 0.14544 | 0.37727 |
| 0.17463 | 0.1946  | 0.14554 | 0.10877 | 0.14553 | 0.25085 | 0.14553 | 0.37773 |
| 0.17474 | 0.19469 | 0.14563 | 0.10877 | 0.14562 | 0.25121 | 0.14562 | 0.37799 |
| 0.17485 | 0.19496 | 0.14572 | 0.10886 | 0.14571 | 0.25166 | 0.14572 | 0.37872 |
| 0.17497 | 0.19496 | 0.14581 | 0.10904 | 0.14581 | 0.25175 | 0.14581 | 0.3789  |
| 0.17507 | 0.19505 | 0.14591 | 0.10931 | 0.1459  | 0.25221 | 0.1459  | 0.37946 |
| 0.17519 | 0.19542 | 0.146   | 0.10959 | 0.14599 | 0.25275 | 0.146   | 0.37982 |
| 0.1753  | 0.19542 | 0.14609 | 0.10986 | 0.14609 | 0.25303 | 0.14609 | 0.38009 |
| 0.17541 | 0.19551 | 0.14619 | 0.10977 | 0.14617 | 0.25348 | 0.14618 | 0.38036 |
| 0.17552 | 0.19614 | 0.14628 | 0.11013 | 0.14627 | 0.25357 | 0.14627 | 0.38054 |
| 0.17563 | 0.19642 | 0.14637 | 0.11049 | 0.14637 | 0.25367 | 0.14637 | 0.38109 |
| 0.17575 | 0.19669 | 0.14646 | 0.11049 | 0.14646 | 0.2543  | 0.14646 | 0.38155 |
| 0.17585 | 0.19687 | 0.14656 | 0.1104  | 0.14655 | 0.25448 | 0.14655 | 0.38173 |
| 0.17597 | 0.19724 | 0.14665 | 0.11086 | 0.14664 | 0.25476 | 0.14664 | 0.38191 |
| 0.17607 | 0.1976  | 0.14674 | 0.11095 | 0.14673 | 0.25512 | 0.14673 | 0.38228 |
| 0.17619 | 0.19787 | 0.14684 | 0.11123 | 0.14682 | 0.25558 | 0.14683 | 0.38291 |
| 0.1763  | 0.19824 | 0.14693 | 0.11141 | 0.14692 | 0.25576 | 0.14692 | 0.38337 |
| 0.17641 | 0.19833 | 0.14702 | 0.11141 | 0.14701 | 0.25613 | 0.14701 | 0.38355 |
| 0.17652 | 0.19842 | 0.14711 | 0.11141 | 0.1471  | 0.25649 | 0.14711 | 0.38401 |
| 0.17663 | 0.19842 | 0.1472  | 0.11141 | 0.1472  | 0.25658 | 0.1472  | 0.38446 |
| 0.17674 | 0.19851 | 0.1473  | 0.11159 | 0.14729 | 0.25712 | 0.14729 | 0.38483 |
| 0.17686 | 0.19924 | 0.14739 | 0.11168 | 0.14738 | 0.25749 | 0.14738 | 0.3851  |
| 0.17696 | 0.1997  | 0.14748 | 0.11177 | 0.14747 | 0.25758 | 0.14748 | 0.38582 |
| 0.17708 | 0.1997  | 0.14757 | 0.11214 | 0.14756 | 0.25804 | 0.14756 | 0.38582 |
| 0.17719 | 0.19961 | 0.14767 | 0.11195 | 0.14766 | 0.25867 | 0.14766 | 0.38637 |
| 0.1773  | 0.19997 | 0.14776 | 0.11195 | 0.14775 | 0.25877 | 0.14776 | 0.38655 |
| 0.17741 | 0.20015 | 0.14785 | 0.11222 | 0.14785 | 0.25904 | 0.14785 | 0.38609 |
| 0.17752 | 0.20042 | 0.14795 | 0.11214 | 0.14793 | 0.25958 | 0.14794 | 0.38655 |
| 0.17764 | 0.20088 | 0.14804 | 0.1125  | 0.14803 | 0.26004 | 0.14803 | 0.38728 |
| 0.17774 | 0.20124 | 0.14813 | 0.11277 | 0.14813 | 0.26031 | 0.14813 | 0.38774 |
| 0.17786 | 0.20124 | 0.14822 | 0.11313 | 0.14821 | 0.26067 | 0.14821 | 0.38828 |
| 0.17796 | 0.2016  | 0.14832 | 0.11305 | 0.14831 | 0.26076 | 0.14831 | 0.3881  |
| 0.17808 | 0.20188 | 0.14841 | 0.11305 | 0.1484  | 0.26113 | 0.1484  | 0.38855 |
| 0.17818 | 0.20197 | 0.1485  | 0.11341 | 0.14849 | 0.26158 | 0.14849 | 0.38892 |
| 0.1783  | 0.20224 | 0.14859 | 0.11368 | 0.14858 | 0.26195 | 0.14859 | 0.38938 |
| 0.17841 | 0.20269 | 0.14868 | 0.11341 | 0.14868 | 0.26249 | 0.14868 | 0.38956 |
| 0.17852 | 0.20288 | 0.14878 | 0.1135  | 0.14877 | 0.26286 | 0.14877 | 0.39029 |
| 0.17863 | 0.20297 | 0.14887 | 0.11368 | 0.14886 | 0.26286 | 0.14886 | 0.39065 |
| 0.17874 | 0.20306 | 0.14896 | 0.11405 | 0.14896 | 0.26322 | 0.14896 | 0.39065 |
| 0.17885 | 0.20334 | 0.14906 | 0.11414 | 0.14905 | 0.26349 | 0.14905 | 0.39101 |
| 0.17896 | 0.20379 | 0.14915 | 0.11414 | 0.14914 | 0.26386 | 0.14914 | 0.39183 |
| 0.17908 | 0.20397 | 0.14924 | 0.11459 | 0.14923 | 0.26459 | 0.14924 | 0.39211 |
| 0.17919 | 0.20407 | 0.14933 | 0.11468 | 0.14932 | 0.26496 | 0.14932 | 0.39247 |
| 0.1793  | 0.20434 | 0.14943 | 0.11496 | 0.14942 | 0.26504 | 0.14942 | 0.39301 |
| 0.17941 | 0.20461 | 0.14952 | 0.11496 | 0.14951 | 0.2654  | 0.14951 | 0.39338 |
| 0.17952 | 0.2047  | 0.14961 | 0.11468 | 0.1496  | 0.2655  | 0.1496  | 0.39374 |
| 0.17963 | 0.20506 | 0.1497  | 0.11496 | 0.14969 | 0.26577 | 0.1497  | 0.39456 |
| 0.17975 | 0.20497 | 0.1498  | 0.11523 | 0.14979 | 0.26632 | 0.14979 | 0.39465 |
| 0.17985 | 0.20525 | 0.14989 | 0.1155  | 0.14988 | 0.26677 | 0.14988 | 0.39483 |
| 0.17997 | 0.20543 | 0.14998 | 0.11569 | 0.14997 | 0.26714 | 0.14997 | 0.39557 |
| 0.18007 | 0.20533 | 0.15008 | 0.11586 | 0.15007 | 0.2675  | 0.15007 | 0.39584 |
| 0.18019 | 0.2057  | 0.15016 | 0.11595 | 0.15016 | 0.26787 | 0.15016 | 0.3962  |
| 0.1803  | 0.20597 | 0.15026 | 0.11595 | 0.15025 | 0.26796 | 0.15025 | 0.39665 |
| 0.18041 | 0.20616 | 0.15035 | 0.11632 | 0.15034 | 0.26841 | 0.15035 | 0.39656 |

|         |         |         |         |         |         |         |         |
|---------|---------|---------|---------|---------|---------|---------|---------|
| 0.18052 | 0.20625 | 0.15044 | 0.11614 | 0.15044 | 0.26868 | 0.15044 | 0.39766 |
| 0.18063 | 0.20625 | 0.15054 | 0.11632 | 0.15053 | 0.26877 | 0.15053 | 0.39821 |
| 0.18075 | 0.2068  | 0.15063 | 0.11678 | 0.15062 | 0.26932 | 0.15062 | 0.3983  |
| 0.18085 | 0.20716 | 0.15072 | 0.11687 | 0.15072 | 0.26959 | 0.15072 | 0.39857 |
| 0.18097 | 0.20734 | 0.15082 | 0.11687 | 0.1508  | 0.26996 | 0.15081 | 0.39875 |
| 0.18107 | 0.20734 | 0.15091 | 0.11695 | 0.1509  | 0.27014 | 0.1509  | 0.39793 |
| 0.18119 | 0.20762 | 0.151   | 0.11695 | 0.15099 | 0.27087 | 0.151   | 0.39839 |
| 0.1813  | 0.20789 | 0.15109 | 0.11723 | 0.15109 | 0.27132 | 0.15109 | 0.39911 |
| 0.18141 | 0.20807 | 0.15119 | 0.1176  | 0.15118 | 0.27178 | 0.15118 | 0.39911 |
| 0.18152 | 0.20852 | 0.15127 | 0.1176  | 0.15127 | 0.27196 | 0.15127 | 0.39911 |
| 0.18163 | 0.20879 | 0.15137 | 0.11778 | 0.15136 | 0.27224 | 0.15136 | 0.39994 |
| 0.18174 | 0.20879 | 0.15146 | 0.11787 | 0.15145 | 0.27251 | 0.15146 | 0.40038 |
| 0.18186 | 0.20916 | 0.15156 | 0.11823 | 0.15155 | 0.27287 | 0.15155 | 0.40057 |
| 0.18196 | 0.20934 | 0.15165 | 0.11842 | 0.15164 | 0.27323 | 0.15164 | 0.40066 |
| 0.18208 | 0.2097  | 0.15174 | 0.11868 | 0.15173 | 0.27369 | 0.15173 | 0.4013  |
| 0.18219 | 0.20979 | 0.15184 | 0.11878 | 0.15183 | 0.27415 | 0.15183 | 0.40184 |
| 0.1823  | 0.20998 | 0.15192 | 0.11878 | 0.15192 | 0.27469 | 0.15192 | 0.40184 |
| 0.18241 | 0.21007 | 0.15202 | 0.11887 | 0.15201 | 0.2746  | 0.15201 | 0.40202 |
| 0.18252 | 0.21053 | 0.15212 | 0.11905 | 0.1521  | 0.27488 | 0.15211 | 0.40266 |
| 0.18264 | 0.2108  | 0.1522  | 0.11896 | 0.1522  | 0.27551 | 0.1522  | 0.40284 |
| 0.18274 | 0.2108  | 0.1523  | 0.11933 | 0.15228 | 0.27578 | 0.15229 | 0.40349 |
| 0.18286 | 0.21107 | 0.15239 | 0.11978 | 0.15238 | 0.27624 | 0.15238 | 0.40385 |
| 0.18296 | 0.21107 | 0.15248 | 0.11969 | 0.15247 | 0.27651 | 0.15247 | 0.40403 |
| 0.18308 | 0.21144 | 0.15258 | 0.11996 | 0.15257 | 0.27669 | 0.15257 | 0.40457 |
| 0.18318 | 0.21153 | 0.15267 | 0.11987 | 0.15266 | 0.27661 | 0.15266 | 0.40503 |
| 0.1833  | 0.21171 | 0.15276 | 0.12005 | 0.15275 | 0.27696 | 0.15276 | 0.40521 |
| 0.18341 | 0.21198 | 0.15285 | 0.12042 | 0.15284 | 0.27705 | 0.15284 | 0.40549 |
| 0.18352 | 0.21262 | 0.15295 | 0.12069 | 0.15294 | 0.2776  | 0.15294 | 0.40631 |
| 0.18363 | 0.21289 | 0.15303 | 0.12069 | 0.15303 | 0.27788 | 0.15303 | 0.40712 |
| 0.18374 | 0.21253 | 0.15313 | 0.12078 | 0.15312 | 0.27815 | 0.15312 | 0.4074  |
| 0.18385 | 0.21271 | 0.15322 | 0.12087 | 0.15321 | 0.27834 | 0.15322 | 0.40776 |
| 0.18397 | 0.21326 | 0.15331 | 0.12087 | 0.15331 | 0.27878 | 0.15331 | 0.4083  |
| 0.18408 | 0.21371 | 0.15341 | 0.12114 | 0.1534  | 0.27933 | 0.1534  | 0.40849 |
| 0.18419 | 0.21426 | 0.1535  | 0.12151 | 0.15349 | 0.27997 | 0.15349 | 0.40876 |
| 0.1843  | 0.21471 | 0.1536  | 0.12178 | 0.15359 | 0.28015 | 0.15359 | 0.40913 |
| 0.18441 | 0.21498 | 0.15368 | 0.12196 | 0.15368 | 0.28043 | 0.15368 | 0.40913 |
| 0.18452 | 0.21508 | 0.15378 | 0.12215 | 0.15377 | 0.28079 | 0.15377 | 0.40994 |
| 0.18463 | 0.21508 | 0.15387 | 0.12242 | 0.15386 | 0.28106 | 0.15387 | 0.41049 |
| 0.18475 | 0.21517 | 0.15396 | 0.12242 | 0.15395 | 0.28124 | 0.15395 | 0.41058 |
| 0.18485 | 0.21544 | 0.15406 | 0.12251 | 0.15405 | 0.2817  | 0.15405 | 0.41149 |
| 0.18497 | 0.21581 | 0.15415 | 0.12278 | 0.15414 | 0.28198 | 0.15414 | 0.41168 |
| 0.18507 | 0.21535 | 0.15424 | 0.12306 | 0.15423 | 0.2827  | 0.15423 | 0.41186 |
| 0.18519 | 0.21535 | 0.15433 | 0.12306 | 0.15432 | 0.28261 | 0.15433 | 0.4124  |
| 0.1853  | 0.21553 | 0.15443 | 0.12324 | 0.15442 | 0.28298 | 0.15442 | 0.41267 |
| 0.18541 | 0.21572 | 0.15452 | 0.12342 | 0.15451 | 0.28379 | 0.15451 | 0.41285 |
| 0.18552 | 0.21617 | 0.15461 | 0.12342 | 0.1546  | 0.28398 | 0.1546  | 0.41341 |
| 0.18563 | 0.21644 | 0.15471 | 0.12361 | 0.1547  | 0.28406 | 0.1547  | 0.41386 |
| 0.18575 | 0.21654 | 0.1548  | 0.12387 | 0.15479 | 0.28452 | 0.15479 | 0.41413 |
| 0.18585 | 0.21698 | 0.15489 | 0.12379 | 0.15488 | 0.2847  | 0.15488 | 0.41477 |
| 0.18597 | 0.21726 | 0.15498 | 0.12424 | 0.15497 | 0.28488 | 0.15498 | 0.41495 |
| 0.18607 | 0.21735 | 0.15507 | 0.12424 | 0.15507 | 0.28543 | 0.15507 | 0.41495 |
| 0.18619 | 0.21744 | 0.15517 | 0.12451 | 0.15516 | 0.28616 | 0.15516 | 0.41559 |
| 0.1863  | 0.21753 | 0.15526 | 0.12488 | 0.15525 | 0.28634 | 0.15525 | 0.4164  |
| 0.18641 | 0.2178  | 0.15535 | 0.12488 | 0.15535 | 0.28688 | 0.15535 | 0.41668 |

|         |         |         |         |         |         |         |         |
|---------|---------|---------|---------|---------|---------|---------|---------|
| 0.18652 | 0.21826 | 0.15544 | 0.12515 | 0.15543 | 0.28734 | 0.15543 | 0.41741 |
| 0.18663 | 0.21854 | 0.15554 | 0.12533 | 0.15553 | 0.28734 | 0.15553 | 0.41777 |
| 0.18674 | 0.21872 | 0.15563 | 0.12524 | 0.15562 | 0.28762 | 0.15563 | 0.41786 |
| 0.18685 | 0.21863 | 0.15572 | 0.12551 | 0.15572 | 0.2878  | 0.15572 | 0.41841 |
| 0.18696 | 0.21908 | 0.15582 | 0.12551 | 0.1558  | 0.28816 | 0.15581 | 0.41905 |
| 0.18708 | 0.21927 | 0.15591 | 0.12588 | 0.1559  | 0.28862 | 0.1559  | 0.41895 |
| 0.18719 | 0.21936 | 0.156   | 0.12615 | 0.15599 | 0.28889 | 0.15599 | 0.42005 |
| 0.1873  | 0.21972 | 0.15609 | 0.12624 | 0.15608 | 0.28925 | 0.15609 | 0.42023 |
| 0.18741 | 0.21972 | 0.15619 | 0.12633 | 0.15618 | 0.28989 | 0.15618 | 0.42041 |
| 0.18752 | 0.2199  | 0.15628 | 0.12643 | 0.15627 | 0.29044 | 0.15627 | 0.42077 |
| 0.18764 | 0.22044 | 0.15637 | 0.12652 | 0.15636 | 0.29053 | 0.15636 | 0.42077 |
| 0.18774 | 0.22063 | 0.15647 | 0.1266  | 0.15646 | 0.2908  | 0.15646 | 0.4216  |
| 0.18786 | 0.22099 | 0.15655 | 0.12679 | 0.15655 | 0.29099 | 0.15655 | 0.42187 |
| 0.18796 | 0.22099 | 0.15665 | 0.12669 | 0.15664 | 0.29135 | 0.15664 | 0.42233 |
| 0.18808 | 0.22108 | 0.15674 | 0.12688 | 0.15673 | 0.29199 | 0.15674 | 0.42296 |
| 0.18818 | 0.22154 | 0.15683 | 0.12733 | 0.15683 | 0.29262 | 0.15683 | 0.4236  |
| 0.1883  | 0.22163 | 0.15693 | 0.12761 | 0.15691 | 0.29317 | 0.15692 | 0.42378 |
| 0.18841 | 0.2219  | 0.15702 | 0.12788 | 0.15701 | 0.29335 | 0.15701 | 0.42441 |
| 0.18852 | 0.22217 | 0.15711 | 0.12815 | 0.15711 | 0.29362 | 0.15711 | 0.42469 |
| 0.18863 | 0.22254 | 0.1572  | 0.12797 | 0.1572  | 0.29417 | 0.1572  | 0.42478 |
| 0.18874 | 0.22245 | 0.1573  | 0.12797 | 0.15729 | 0.29453 | 0.15729 | 0.42515 |
| 0.18885 | 0.22272 | 0.15739 | 0.12843 | 0.15738 | 0.29471 | 0.15739 | 0.4256  |
| 0.18896 | 0.2229  | 0.15748 | 0.12879 | 0.15748 | 0.2948  | 0.15748 | 0.42587 |
| 0.18908 | 0.22318 | 0.15758 | 0.12907 | 0.15756 | 0.29517 | 0.15757 | 0.42623 |
| 0.18919 | 0.22363 | 0.15766 | 0.12952 | 0.15766 | 0.2959  | 0.15766 | 0.42696 |
| 0.1893  | 0.2239  | 0.15776 | 0.12943 | 0.15775 | 0.29581 | 0.15775 | 0.42687 |
| 0.18941 | 0.22363 | 0.15785 | 0.12943 | 0.15784 | 0.29636 | 0.15785 | 0.42733 |
| 0.18952 | 0.2239  | 0.15794 | 0.1297  | 0.15794 | 0.29663 | 0.15794 | 0.42815 |
| 0.18963 | 0.22446 | 0.15804 | 0.12979 | 0.15803 | 0.29699 | 0.15803 | 0.42833 |
| 0.18975 | 0.22436 | 0.15813 | 0.12952 | 0.15812 | 0.29717 | 0.15812 | 0.42852 |
| 0.18985 | 0.22427 | 0.15822 | 0.12989 | 0.15822 | 0.29799 | 0.15822 | 0.42915 |
| 0.18997 | 0.22482 | 0.15831 | 0.13025 | 0.15831 | 0.29809 | 0.15831 | 0.42961 |
| 0.19007 | 0.2249  | 0.15841 | 0.13052 | 0.1584  | 0.29818 | 0.1584  | 0.42979 |
| 0.19019 | 0.22518 | 0.1585  | 0.13061 | 0.15849 | 0.29872 | 0.1585  | 0.43015 |
| 0.1903  | 0.22581 | 0.15859 | 0.13061 | 0.15859 | 0.299   | 0.15858 | 0.43069 |
| 0.19041 | 0.22591 | 0.15869 | 0.13088 | 0.15868 | 0.29954 | 0.15868 | 0.43115 |
| 0.19052 | 0.22591 | 0.15878 | 0.13134 | 0.15877 | 0.29954 | 0.15877 | 0.43179 |
| 0.19063 | 0.22618 | 0.15887 | 0.13143 | 0.15887 | 0.29999 | 0.15887 | 0.43206 |
| 0.19075 | 0.22646 | 0.15896 | 0.13152 | 0.15895 | 0.30054 | 0.15895 | 0.43215 |
| 0.19085 | 0.22664 | 0.15906 | 0.1318  | 0.15905 | 0.30072 | 0.15905 | 0.43279 |
| 0.19097 | 0.22728 | 0.15915 | 0.13171 | 0.15914 | 0.3009  | 0.15914 | 0.43334 |
| 0.19107 | 0.22728 | 0.15924 | 0.13188 | 0.15923 | 0.30117 | 0.15923 | 0.43334 |
| 0.19119 | 0.22737 | 0.15934 | 0.13234 | 0.15932 | 0.30182 | 0.15933 | 0.43379 |
| 0.1913  | 0.22737 | 0.15943 | 0.13225 | 0.15942 | 0.30191 | 0.15942 | 0.43416 |
| 0.19141 | 0.22764 | 0.15952 | 0.13225 | 0.15951 | 0.30236 | 0.15951 | 0.43497 |
| 0.19152 | 0.22782 | 0.15961 | 0.13289 | 0.1596  | 0.30281 | 0.15961 | 0.43515 |
| 0.19163 | 0.228   | 0.1597  | 0.13334 | 0.1597  | 0.30309 | 0.1597  | 0.43533 |
| 0.19174 | 0.22836 | 0.1598  | 0.13343 | 0.15979 | 0.30327 | 0.15979 | 0.43571 |
| 0.19186 | 0.22845 | 0.15989 | 0.13352 | 0.15988 | 0.30354 | 0.15988 | 0.43652 |
| 0.19196 | 0.22891 | 0.15998 | 0.13371 | 0.15998 | 0.30428 | 0.15998 | 0.43707 |
| 0.19208 | 0.22919 | 0.16007 | 0.13398 | 0.16006 | 0.30455 | 0.16006 | 0.43689 |
| 0.19219 | 0.22955 | 0.16017 | 0.13398 | 0.16016 | 0.30491 | 0.16016 | 0.43725 |
| 0.1923  | 0.22946 | 0.16026 | 0.13416 | 0.16025 | 0.30527 | 0.16026 | 0.43798 |
| 0.19241 | 0.22973 | 0.16035 | 0.13443 | 0.16035 | 0.30582 | 0.16035 | 0.43834 |



|         |         |         |         |         |         |         |         |
|---------|---------|---------|---------|---------|---------|---------|---------|
| 0.19252 | 0.22992 | 0.16045 | 0.13453 | 0.16043 | 0.30601 | 0.16044 | 0.4387  |
| 0.19264 | 0.2301  | 0.16054 | 0.13479 | 0.16053 | 0.30628 | 0.16053 | 0.43925 |
| 0.19274 | 0.23046 | 0.16063 | 0.1347  | 0.16062 | 0.30692 | 0.16062 | 0.43962 |
| 0.19286 | 0.23091 | 0.16072 | 0.13479 | 0.16071 | 0.30727 | 0.16071 | 0.44017 |
| 0.19296 | 0.23082 | 0.16082 | 0.13516 | 0.16081 | 0.30737 | 0.16081 | 0.44071 |
| 0.19308 | 0.23119 | 0.16091 | 0.13534 | 0.1609  | 0.30764 | 0.16091 | 0.44153 |
| 0.19318 | 0.23146 | 0.161   | 0.13534 | 0.16099 | 0.30773 | 0.16099 | 0.44207 |
| 0.1933  | 0.23183 | 0.1611  | 0.13544 | 0.16108 | 0.30846 | 0.16109 | 0.44189 |
| 0.19341 | 0.23174 | 0.16118 | 0.13571 | 0.16118 | 0.30909 | 0.16118 | 0.44225 |
| 0.19352 | 0.23183 | 0.16128 | 0.13616 | 0.16127 | 0.309   | 0.16127 | 0.44253 |
| 0.19363 | 0.23219 | 0.16137 | 0.13634 | 0.16136 | 0.30937 | 0.16136 | 0.44262 |
| 0.19374 | 0.2321  | 0.16146 | 0.13653 | 0.16146 | 0.30964 | 0.16146 | 0.44326 |
| 0.19385 | 0.23255 | 0.16156 | 0.13662 | 0.16154 | 0.31001 | 0.16155 | 0.44362 |
| 0.19397 | 0.23246 | 0.16165 | 0.13689 | 0.16164 | 0.31055 | 0.16164 | 0.44416 |
| 0.19408 | 0.23255 | 0.16174 | 0.13699 | 0.16174 | 0.31101 | 0.16174 | 0.44435 |
| 0.19419 | 0.23291 | 0.16183 | 0.13689 | 0.16183 | 0.31146 | 0.16183 | 0.4448  |
| 0.1943  | 0.2331  | 0.16193 | 0.13717 | 0.16192 | 0.31174 | 0.16192 | 0.44581 |
| 0.19441 | 0.23373 | 0.16202 | 0.13725 | 0.16201 | 0.31192 | 0.16201 | 0.44608 |
| 0.19452 | 0.2341  | 0.16211 | 0.13735 | 0.16211 | 0.3121  | 0.16211 | 0.44617 |
| 0.19463 | 0.23465 | 0.16221 | 0.13762 | 0.16219 | 0.31238 | 0.1622  | 0.44608 |
| 0.19475 | 0.23465 | 0.1623  | 0.13789 | 0.16229 | 0.31328 | 0.16229 | 0.44644 |
| 0.19485 | 0.23492 | 0.16239 | 0.13798 | 0.16238 | 0.31356 | 0.16239 | 0.44726 |
| 0.19497 | 0.2351  | 0.16248 | 0.13816 | 0.16247 | 0.31365 | 0.16247 | 0.44763 |
| 0.19507 | 0.23519 | 0.16257 | 0.13844 | 0.16257 | 0.31438 | 0.16257 | 0.44745 |
| 0.19519 | 0.23547 | 0.16266 | 0.13862 | 0.16266 | 0.31455 | 0.16266 | 0.44853 |
| 0.1953  | 0.23574 | 0.16276 | 0.13898 | 0.16275 | 0.31465 | 0.16275 | 0.44881 |
| 0.19541 | 0.23555 | 0.16285 | 0.13926 | 0.16284 | 0.31519 | 0.16285 | 0.44944 |
| 0.19552 | 0.23574 | 0.16294 | 0.13953 | 0.16294 | 0.31538 | 0.16294 | 0.44972 |
| 0.19563 | 0.2361  | 0.16304 | 0.13971 | 0.16303 | 0.31583 | 0.16303 | 0.44944 |
| 0.19575 | 0.23646 | 0.16313 | 0.13981 | 0.16312 | 0.31647 | 0.16312 | 0.45018 |
| 0.19585 | 0.23665 | 0.16322 | 0.13989 | 0.16322 | 0.31674 | 0.16322 | 0.45072 |
| 0.19597 | 0.23674 | 0.16331 | 0.13981 | 0.1633  | 0.31674 | 0.16331 | 0.45081 |
| 0.19608 | 0.23701 | 0.16341 | 0.14035 | 0.1634  | 0.3171  | 0.1634  | 0.45109 |
| 0.19619 | 0.2372  | 0.1635  | 0.14053 | 0.16349 | 0.31729 | 0.1635  | 0.45181 |
| 0.1963  | 0.23774 | 0.16359 | 0.14044 | 0.16358 | 0.31775 | 0.16358 | 0.45227 |
| 0.19641 | 0.23811 | 0.16369 | 0.1409  | 0.16368 | 0.31811 | 0.16368 | 0.45236 |
| 0.19652 | 0.23828 | 0.16377 | 0.14108 | 0.16377 | 0.31838 | 0.16377 | 0.453   |
| 0.19663 | 0.2382  | 0.16387 | 0.14135 | 0.16387 | 0.31857 | 0.16386 | 0.45318 |
| 0.19674 | 0.23837 | 0.16397 | 0.14153 | 0.16395 | 0.31911 | 0.16396 | 0.45372 |
| 0.19686 | 0.23865 | 0.16406 | 0.14163 | 0.16405 | 0.31966 | 0.16405 | 0.45446 |
| 0.19696 | 0.23911 | 0.16415 | 0.14172 | 0.16414 | 0.31956 | 0.16414 | 0.45454 |
| 0.19708 | 0.23911 | 0.16424 | 0.14199 | 0.16423 | 0.32002 | 0.16423 | 0.45464 |
| 0.19719 | 0.23929 | 0.16433 | 0.14226 | 0.16433 | 0.32066 | 0.16433 | 0.45545 |
| 0.1973  | 0.23965 | 0.16442 | 0.14226 | 0.16442 | 0.32084 | 0.16442 | 0.456   |
| 0.19741 | 0.23965 | 0.16452 | 0.14254 | 0.16451 | 0.32138 | 0.16451 | 0.45673 |
| 0.19752 | 0.24011 | 0.16461 | 0.1429  | 0.1646  | 0.32184 | 0.16461 | 0.45718 |
| 0.19764 | 0.24029 | 0.1647  | 0.1429  | 0.1647  | 0.3223  | 0.1647  | 0.45764 |
| 0.19774 | 0.24056 | 0.1648  | 0.14317 | 0.16478 | 0.3223  | 0.16479 | 0.45809 |
| 0.19786 | 0.24056 | 0.16489 | 0.14335 | 0.16488 | 0.32239 | 0.16488 | 0.45864 |
| 0.19796 | 0.24101 | 0.16498 | 0.14326 | 0.16498 | 0.32293 | 0.16498 | 0.45891 |
| 0.19808 | 0.2412  | 0.16507 | 0.14372 | 0.16507 | 0.32339 | 0.16507 | 0.45928 |
| 0.19819 | 0.24174 | 0.16517 | 0.14408 | 0.16516 | 0.32339 | 0.16516 | 0.45964 |
| 0.1983  | 0.24165 | 0.16526 | 0.1439  | 0.16525 | 0.32411 | 0.16525 | 0.46    |
| 0.19841 | 0.24156 | 0.16535 | 0.1439  | 0.16534 | 0.32493 | 0.16534 | 0.46064 |

|         |         |         |         |         |         |         |         |
|---------|---------|---------|---------|---------|---------|---------|---------|
| 0.19852 | 0.24193 | 0.16545 | 0.14408 | 0.16544 | 0.32502 | 0.16544 | 0.46101 |
| 0.19863 | 0.24211 | 0.16554 | 0.14445 | 0.16553 | 0.32511 | 0.16553 | 0.46101 |
| 0.19874 | 0.24248 | 0.16563 | 0.14481 | 0.16562 | 0.32575 | 0.16562 | 0.46155 |
| 0.19885 | 0.24248 | 0.16573 | 0.14481 | 0.16571 | 0.32585 | 0.16572 | 0.46201 |
| 0.19897 | 0.24266 | 0.16581 | 0.14545 | 0.16581 | 0.32621 | 0.16581 | 0.46228 |
| 0.19908 | 0.24284 | 0.16591 | 0.14553 | 0.1659  | 0.32666 | 0.1659  | 0.46246 |
| 0.19919 | 0.24302 | 0.166   | 0.14536 | 0.16599 | 0.32702 | 0.16599 | 0.46355 |
| 0.1993  | 0.24374 | 0.1661  | 0.14563 | 0.16609 | 0.32739 | 0.16609 | 0.46419 |
| 0.19941 | 0.24402 | 0.16618 | 0.146   | 0.16618 | 0.32767 | 0.16618 | 0.46464 |
| 0.19952 | 0.24393 | 0.16628 | 0.14617 | 0.16627 | 0.32803 | 0.16627 | 0.46492 |
| 0.19963 | 0.2442  | 0.16637 | 0.14609 | 0.16636 | 0.32839 | 0.16637 | 0.46546 |
| 0.19975 | 0.24429 | 0.16646 | 0.14636 | 0.16646 | 0.32876 | 0.16646 | 0.46592 |
| 0.19985 | 0.24447 | 0.16656 | 0.14682 | 0.16655 | 0.32921 | 0.16655 | 0.4662  |
| 0.19997 | 0.24484 | 0.16665 | 0.14699 | 0.16664 | 0.32976 | 0.16664 | 0.46638 |
| 0.20007 | 0.24511 | 0.16674 | 0.14699 | 0.16673 | 0.33048 | 0.16673 | 0.46711 |
| 0.20019 | 0.24539 | 0.16683 | 0.14736 | 0.16682 | 0.33057 | 0.16683 | 0.46765 |
| 0.2003  | 0.24575 | 0.16693 | 0.14708 | 0.16692 | 0.33085 | 0.16692 | 0.46793 |
| 0.20041 | 0.24603 | 0.16702 | 0.14736 | 0.16701 | 0.33103 | 0.16702 | 0.46819 |
| 0.20052 | 0.24621 | 0.16711 | 0.14772 | 0.1671  | 0.3313  | 0.1671  | 0.46865 |
| 0.20063 | 0.24657 | 0.16721 | 0.1479  | 0.16719 | 0.33203 | 0.1672  | 0.46911 |
| 0.20075 | 0.24657 | 0.16729 | 0.14808 | 0.16729 | 0.33249 | 0.16729 | 0.46929 |
| 0.20085 | 0.24675 | 0.16739 | 0.14845 | 0.16738 | 0.33267 | 0.16738 | 0.46938 |
| 0.20097 | 0.24712 | 0.16748 | 0.14854 | 0.16747 | 0.33303 | 0.16748 | 0.47011 |
| 0.20107 | 0.24721 | 0.16757 | 0.14882 | 0.16757 | 0.33321 | 0.16757 | 0.47074 |
| 0.20119 | 0.24739 | 0.16767 | 0.14909 | 0.16765 | 0.33331 | 0.16766 | 0.4712  |
| 0.2013  | 0.24784 | 0.16776 | 0.14927 | 0.16775 | 0.33395 | 0.16775 | 0.47193 |
| 0.20141 | 0.24812 | 0.16785 | 0.14918 | 0.16785 | 0.33458 | 0.16785 | 0.47202 |
| 0.20152 | 0.24803 | 0.16794 | 0.14945 | 0.16793 | 0.33485 | 0.16794 | 0.47265 |
| 0.20163 | 0.24848 | 0.16804 | 0.14973 | 0.16803 | 0.33558 | 0.16803 | 0.47284 |
| 0.20174 | 0.24848 | 0.16813 | 0.1499  | 0.16812 | 0.33595 | 0.16813 | 0.4732  |
| 0.20186 | 0.24875 | 0.16822 | 0.15    | 0.16821 | 0.33595 | 0.16821 | 0.47375 |
| 0.20196 | 0.24893 | 0.16832 | 0.15018 | 0.1683  | 0.33622 | 0.16831 | 0.47411 |
| 0.20208 | 0.24912 | 0.16841 | 0.15018 | 0.1684  | 0.33659 | 0.1684  | 0.47466 |
| 0.20219 | 0.24966 | 0.1685  | 0.15055 | 0.16849 | 0.33695 | 0.16849 | 0.4753  |
| 0.2023  | 0.24984 | 0.16859 | 0.15081 | 0.16858 | 0.33713 | 0.16858 | 0.47575 |
| 0.20241 | 0.24975 | 0.16869 | 0.15081 | 0.16868 | 0.33777 | 0.16868 | 0.47594 |
| 0.20252 | 0.25012 | 0.16878 | 0.15109 | 0.16877 | 0.33804 | 0.16877 | 0.47675 |
| 0.20264 | 0.25048 | 0.16887 | 0.15136 | 0.16886 | 0.33832 | 0.16886 | 0.47657 |
| 0.20274 | 0.25094 | 0.16896 | 0.15164 | 0.16896 | 0.33858 | 0.16896 | 0.47657 |
| 0.20286 | 0.25103 | 0.16905 | 0.15164 | 0.16905 | 0.33886 | 0.16905 | 0.47748 |
| 0.20296 | 0.2513  | 0.16915 | 0.152   | 0.16914 | 0.33931 | 0.16914 | 0.47802 |
| 0.20308 | 0.25121 | 0.16925 | 0.15218 | 0.16923 | 0.33968 | 0.16924 | 0.47857 |
| 0.20318 | 0.2513  | 0.16933 | 0.15236 | 0.16933 | 0.34004 | 0.16933 | 0.4793  |
| 0.2033  | 0.2513  | 0.16943 | 0.15227 | 0.16941 | 0.34041 | 0.16942 | 0.47967 |
| 0.20341 | 0.25166 | 0.16952 | 0.15227 | 0.16951 | 0.34095 | 0.16951 | 0.47985 |
| 0.20352 | 0.25212 | 0.16961 | 0.15236 | 0.16961 | 0.34122 | 0.16961 | 0.48039 |
| 0.20363 | 0.25221 | 0.1697  | 0.15282 | 0.1697  | 0.3415  | 0.1697  | 0.48094 |
| 0.20374 | 0.25249 | 0.1698  | 0.15282 | 0.16979 | 0.34177 | 0.16979 | 0.48121 |
| 0.20385 | 0.25276 | 0.16989 | 0.15273 | 0.16988 | 0.34196 | 0.16988 | 0.48221 |
| 0.20397 | 0.25303 | 0.16998 | 0.15309 | 0.16997 | 0.34232 | 0.16997 | 0.48267 |
| 0.20408 | 0.2533  | 0.17008 | 0.15355 | 0.17007 | 0.34259 | 0.17007 | 0.48276 |
| 0.20419 | 0.2533  | 0.17017 | 0.15391 | 0.17016 | 0.34341 | 0.17016 | 0.48321 |
| 0.2043  | 0.25339 | 0.17026 | 0.15409 | 0.17025 | 0.34341 | 0.17025 | 0.48349 |
| 0.20441 | 0.25376 | 0.17035 | 0.15418 | 0.17034 | 0.34378 | 0.17035 | 0.48413 |

|         |         |         |         |         |         |         |         |
|---------|---------|---------|---------|---------|---------|---------|---------|
| 0.20452 | 0.25376 | 0.17045 | 0.15428 | 0.17044 | 0.34432 | 0.17044 | 0.48485 |
| 0.20463 | 0.25439 | 0.17054 | 0.15418 | 0.17053 | 0.34441 | 0.17053 | 0.48522 |
| 0.20475 | 0.25467 | 0.17063 | 0.15455 | 0.17062 | 0.34496 | 0.17062 | 0.4854  |
| 0.20485 | 0.25476 | 0.17073 | 0.15473 | 0.17072 | 0.34514 | 0.17072 | 0.48603 |
| 0.20497 | 0.25503 | 0.17081 | 0.15482 | 0.17081 | 0.34569 | 0.17081 | 0.48622 |
| 0.20507 | 0.25521 | 0.17091 | 0.15509 | 0.1709  | 0.34578 | 0.1709  | 0.48631 |
| 0.20519 | 0.2553  | 0.171   | 0.15537 | 0.17099 | 0.34624 | 0.171   | 0.48749 |
| 0.2053  | 0.2553  | 0.17109 | 0.15546 | 0.17109 | 0.34668 | 0.17109 | 0.48768 |
| 0.20541 | 0.25567 | 0.17119 | 0.15573 | 0.17118 | 0.34696 | 0.17118 | 0.48768 |
| 0.20552 | 0.25604 | 0.17128 | 0.15592 | 0.17127 | 0.34714 | 0.17127 | 0.48877 |
| 0.20563 | 0.25667 | 0.17137 | 0.15619 | 0.17137 | 0.3476  | 0.17137 | 0.48941 |
| 0.20575 | 0.25686 | 0.17146 | 0.15628 | 0.17146 | 0.34832 | 0.17146 | 0.48959 |
| 0.20585 | 0.25703 | 0.17156 | 0.15628 | 0.17155 | 0.3485  | 0.17155 | 0.48967 |
| 0.20597 | 0.2574  | 0.17165 | 0.15664 | 0.17164 | 0.3486  | 0.17165 | 0.49059 |
| 0.20608 | 0.25758 | 0.17174 | 0.15664 | 0.17173 | 0.34878 | 0.17173 | 0.49059 |
| 0.20619 | 0.25758 | 0.17184 | 0.15683 | 0.17183 | 0.34896 | 0.17183 | 0.49104 |
| 0.2063  | 0.25813 | 0.17193 | 0.15719 | 0.17192 | 0.34969 | 0.17192 | 0.4915  |
| 0.20641 | 0.25813 | 0.17202 | 0.15737 | 0.17201 | 0.34997 | 0.17201 | 0.49214 |
| 0.20652 | 0.25831 | 0.17211 | 0.15728 | 0.1721  | 0.35024 | 0.17211 | 0.49259 |
| 0.20663 | 0.2584  | 0.1722  | 0.15746 | 0.1722  | 0.35051 | 0.1722  | 0.49232 |
| 0.20674 | 0.25877 | 0.1723  | 0.15791 | 0.17229 | 0.35069 | 0.17229 | 0.49286 |
| 0.20685 | 0.25895 | 0.17239 | 0.15819 | 0.17238 | 0.35096 | 0.17238 | 0.49359 |
| 0.20696 | 0.25922 | 0.17248 | 0.15846 | 0.17247 | 0.3516  | 0.17248 | 0.49359 |
| 0.20708 | 0.25967 | 0.17257 | 0.15873 | 0.17256 | 0.35206 | 0.17256 | 0.49413 |
| 0.20719 | 0.25986 | 0.17267 | 0.15864 | 0.17266 | 0.35206 | 0.17266 | 0.49477 |
| 0.2073  | 0.25967 | 0.17276 | 0.15856 | 0.17275 | 0.35251 | 0.17276 | 0.49487 |
| 0.20741 | 0.25976 | 0.17285 | 0.15873 | 0.17285 | 0.35279 | 0.17285 | 0.49559 |
| 0.20752 | 0.26022 | 0.17295 | 0.1591  | 0.17293 | 0.35315 | 0.17294 | 0.49595 |
| 0.20764 | 0.26032 | 0.17304 | 0.15928 | 0.17303 | 0.35333 | 0.17303 | 0.49668 |
| 0.20774 | 0.26059 | 0.17313 | 0.15974 | 0.17313 | 0.35379 | 0.17313 | 0.49714 |
| 0.20786 | 0.26104 | 0.17322 | 0.1601  | 0.17321 | 0.35424 | 0.17322 | 0.49732 |
| 0.20796 | 0.26158 | 0.17332 | 0.1601  | 0.17331 | 0.35469 | 0.17331 | 0.49768 |
| 0.20808 | 0.26168 | 0.17341 | 0.1601  | 0.1734  | 0.35497 | 0.1734  | 0.4986  |
| 0.20818 | 0.26177 | 0.1735  | 0.16019 | 0.17349 | 0.35543 | 0.17349 | 0.49914 |
| 0.2083  | 0.26223 | 0.17359 | 0.16037 | 0.17358 | 0.35597 | 0.17359 | 0.49914 |
| 0.20841 | 0.26232 | 0.17368 | 0.16065 | 0.17368 | 0.35615 | 0.17368 | 0.49996 |
| 0.20852 | 0.26268 | 0.17378 | 0.16101 | 0.17377 | 0.35615 | 0.17377 | 0.50069 |
| 0.20863 | 0.26295 | 0.17387 | 0.16111 | 0.17386 | 0.35697 | 0.17387 | 0.50087 |
| 0.20874 | 0.26322 | 0.17396 | 0.16111 | 0.17396 | 0.35715 | 0.17396 | 0.50115 |
| 0.20885 | 0.26304 | 0.17406 | 0.16138 | 0.17405 | 0.35752 | 0.17405 | 0.50178 |
| 0.20896 | 0.26368 | 0.17415 | 0.16165 | 0.17414 | 0.35789 | 0.17414 | 0.50196 |
| 0.20908 | 0.26405 | 0.17424 | 0.16174 | 0.17423 | 0.35816 | 0.17424 | 0.50251 |
| 0.20919 | 0.26405 | 0.17433 | 0.16165 | 0.17433 | 0.35834 | 0.17433 | 0.50314 |
| 0.2093  | 0.2645  | 0.17443 | 0.16183 | 0.17442 | 0.35879 | 0.17442 | 0.50342 |
| 0.20941 | 0.2645  | 0.17452 | 0.16201 | 0.17451 | 0.35915 | 0.17452 | 0.50406 |
| 0.20952 | 0.26459 | 0.17461 | 0.1621  | 0.1746  | 0.35934 | 0.1746  | 0.50424 |
| 0.20963 | 0.26504 | 0.17471 | 0.16246 | 0.17469 | 0.35961 | 0.1747  | 0.50497 |
| 0.20975 | 0.26504 | 0.1748  | 0.16292 | 0.17479 | 0.35989 | 0.17479 | 0.50506 |
| 0.20985 | 0.26487 | 0.17489 | 0.16292 | 0.17488 | 0.35998 | 0.17488 | 0.50543 |
| 0.20997 | 0.26532 | 0.17498 | 0.1631  | 0.17497 | 0.36071 | 0.17497 | 0.50597 |
| 0.21007 | 0.26541 | 0.17507 | 0.16338 | 0.17507 | 0.36107 | 0.17507 | 0.50669 |
| 0.21019 | 0.26605 | 0.17516 | 0.16356 | 0.17516 | 0.36116 | 0.17516 | 0.50688 |
| 0.2103  | 0.26641 | 0.17526 | 0.16356 | 0.17525 | 0.36179 | 0.17525 | 0.50715 |
| 0.21041 | 0.2665  | 0.17536 | 0.16365 | 0.17534 | 0.36207 | 0.17535 | 0.50752 |

|         |         |         |         |         |         |         |         |
|---------|---------|---------|---------|---------|---------|---------|---------|
| 0.21052 | 0.26687 | 0.17544 | 0.16383 | 0.17544 | 0.36243 | 0.17544 | 0.50815 |
| 0.21063 | 0.26705 | 0.17554 | 0.1641  | 0.17553 | 0.36289 | 0.17553 | 0.50815 |
| 0.21075 | 0.26714 | 0.17563 | 0.16429 | 0.17562 | 0.36325 | 0.17562 | 0.5087  |
| 0.21085 | 0.26732 | 0.17572 | 0.16438 | 0.17572 | 0.36362 | 0.17572 | 0.50906 |
| 0.21097 | 0.26741 | 0.17582 | 0.16438 | 0.1758  | 0.36416 | 0.17581 | 0.50952 |
| 0.21107 | 0.26777 | 0.17591 | 0.16465 | 0.1759  | 0.36452 | 0.1759  | 0.51007 |
| 0.21119 | 0.26814 | 0.176   | 0.16474 | 0.17599 | 0.36416 | 0.17599 | 0.51098 |
| 0.2113  | 0.26796 | 0.17609 | 0.16484 | 0.17608 | 0.3648  | 0.17608 | 0.51152 |
| 0.21141 | 0.26832 | 0.17619 | 0.16511 | 0.17618 | 0.36553 | 0.17618 | 0.51134 |
| 0.21152 | 0.2686  | 0.17627 | 0.16511 | 0.17627 | 0.3658  | 0.17627 | 0.51216 |
| 0.21163 | 0.26905 | 0.17637 | 0.16529 | 0.17637 | 0.36643 | 0.17636 | 0.51261 |
| 0.21174 | 0.26924 | 0.17647 | 0.16547 | 0.17645 | 0.36643 | 0.17646 | 0.51288 |
| 0.21186 | 0.2695  | 0.17655 | 0.16566 | 0.17655 | 0.3668  | 0.17655 | 0.51325 |
| 0.21196 | 0.26987 | 0.17665 | 0.16601 | 0.17664 | 0.36762 | 0.17664 | 0.51343 |
| 0.21208 | 0.27005 | 0.17674 | 0.16638 | 0.17673 | 0.36799 | 0.17673 | 0.51425 |
| 0.21219 | 0.27033 | 0.17684 | 0.16665 | 0.17683 | 0.36808 | 0.17683 | 0.51452 |
| 0.2123  | 0.27059 | 0.17692 | 0.16647 | 0.17692 | 0.36862 | 0.17692 | 0.51507 |
| 0.21241 | 0.27069 | 0.17702 | 0.16683 | 0.17701 | 0.36898 | 0.17701 | 0.51589 |
| 0.21252 | 0.27105 | 0.17712 | 0.16702 | 0.1771  | 0.36908 | 0.17711 | 0.51635 |
| 0.21264 | 0.2715  | 0.1772  | 0.16729 | 0.1772  | 0.36953 | 0.1772  | 0.51653 |
| 0.21274 | 0.27141 | 0.1773  | 0.16775 | 0.17729 | 0.3698  | 0.17729 | 0.51708 |
| 0.21286 | 0.2716  | 0.17739 | 0.16793 | 0.17738 | 0.36998 | 0.17738 | 0.51789 |
| 0.21296 | 0.27178 | 0.17748 | 0.16766 | 0.17747 | 0.37035 | 0.17747 | 0.51825 |
| 0.21308 | 0.27215 | 0.17758 | 0.16775 | 0.17756 | 0.37044 | 0.17757 | 0.51816 |
| 0.21318 | 0.27224 | 0.17767 | 0.16811 | 0.17766 | 0.37117 | 0.17766 | 0.5188  |
| 0.2133  | 0.2726  | 0.17776 | 0.16838 | 0.17775 | 0.37172 | 0.17775 | 0.51908 |
| 0.21341 | 0.27251 | 0.17785 | 0.16857 | 0.17784 | 0.37208 | 0.17784 | 0.51962 |
| 0.21352 | 0.27305 | 0.17795 | 0.16848 | 0.17794 | 0.37226 | 0.17794 | 0.51999 |
| 0.21363 | 0.27323 | 0.17804 | 0.16838 | 0.17803 | 0.37299 | 0.17803 | 0.52026 |
| 0.21374 | 0.27323 | 0.17813 | 0.16875 | 0.17812 | 0.37345 | 0.17812 | 0.52071 |
| 0.21385 | 0.27314 | 0.17822 | 0.16911 | 0.17821 | 0.37372 | 0.17822 | 0.52126 |
| 0.21397 | 0.27369 | 0.17831 | 0.1693  | 0.17831 | 0.37409 | 0.17831 | 0.52126 |
| 0.21408 | 0.27424 | 0.17841 | 0.16956 | 0.1784  | 0.37463 | 0.1784  | 0.52199 |
| 0.21419 | 0.2747  | 0.1785  | 0.16965 | 0.17849 | 0.3749  | 0.17849 | 0.52271 |
| 0.2143  | 0.2746  | 0.1786  | 0.16956 | 0.17859 | 0.37508 | 0.17859 | 0.52326 |
| 0.21441 | 0.27479 | 0.17868 | 0.16984 | 0.17868 | 0.37545 | 0.17867 | 0.52372 |
| 0.21452 | 0.27497 | 0.17878 | 0.16975 | 0.17877 | 0.37591 | 0.17877 | 0.52472 |
| 0.21463 | 0.27533 | 0.17887 | 0.16993 | 0.17886 | 0.37609 | 0.17887 | 0.52472 |
| 0.21475 | 0.27561 | 0.17896 | 0.1703  | 0.17896 | 0.37618 | 0.17896 | 0.52463 |
| 0.21485 | 0.2757  | 0.17906 | 0.17048 | 0.17905 | 0.37663 | 0.17905 | 0.52544 |
| 0.21497 | 0.27578 | 0.17915 | 0.17075 | 0.17914 | 0.37745 | 0.17914 | 0.52599 |
| 0.21507 | 0.27597 | 0.17924 | 0.17111 | 0.17923 | 0.37764 | 0.17923 | 0.527   |
| 0.21519 | 0.27615 | 0.17933 | 0.1712  | 0.17932 | 0.3779  | 0.17933 | 0.52754 |
| 0.2153  | 0.27652 | 0.17943 | 0.1712  | 0.17942 | 0.37827 | 0.17942 | 0.52763 |
| 0.21541 | 0.27669 | 0.17952 | 0.1713  | 0.17951 | 0.37872 | 0.17952 | 0.52826 |
| 0.21552 | 0.27706 | 0.17961 | 0.17157 | 0.1796  | 0.37927 | 0.1796  | 0.52908 |
| 0.21563 | 0.27751 | 0.17971 | 0.17194 | 0.1797  | 0.37936 | 0.1797  | 0.52945 |
| 0.21575 | 0.27788 | 0.1798  | 0.17194 | 0.17979 | 0.37964 | 0.17979 | 0.52973 |
| 0.21585 | 0.27806 | 0.17989 | 0.17194 | 0.17988 | 0.37946 | 0.17988 | 0.53073 |
| 0.21597 | 0.27806 | 0.17998 | 0.17211 | 0.17997 | 0.38018 | 0.17998 | 0.53109 |
| 0.21608 | 0.27842 | 0.18007 | 0.17239 | 0.18007 | 0.38082 | 0.18007 | 0.53191 |
| 0.21619 | 0.27851 | 0.18017 | 0.17266 | 0.18015 | 0.38082 | 0.18016 | 0.53218 |
| 0.2163  | 0.27861 | 0.18026 | 0.17276 | 0.18025 | 0.38164 | 0.18025 | 0.53227 |
| 0.21641 | 0.27879 | 0.18035 | 0.17312 | 0.18035 | 0.38228 | 0.18035 | 0.53291 |

|         |         |         |         |         |         |         |         |
|---------|---------|---------|---------|---------|---------|---------|---------|
| 0.21652 | 0.27915 | 0.18044 | 0.17339 | 0.18044 | 0.38246 | 0.18044 | 0.53382 |
| 0.21663 | 0.27924 | 0.18054 | 0.17348 | 0.18053 | 0.38291 | 0.18053 | 0.53418 |
| 0.21674 | 0.27952 | 0.18063 | 0.17357 | 0.18062 | 0.38355 | 0.18063 | 0.53482 |
| 0.21686 | 0.27988 | 0.18072 | 0.17357 | 0.18072 | 0.38364 | 0.18072 | 0.53455 |
| 0.21696 | 0.28016 | 0.18082 | 0.17367 | 0.1808  | 0.38383 | 0.18081 | 0.53455 |
| 0.21708 | 0.28007 | 0.18091 | 0.17393 | 0.1809  | 0.38427 | 0.1809  | 0.53564 |
| 0.21719 | 0.28052 | 0.181   | 0.1743  | 0.181   | 0.38446 | 0.181   | 0.5361  |
| 0.2173  | 0.28079 | 0.1811  | 0.17467 | 0.18108 | 0.3851  | 0.18109 | 0.5361  |
| 0.21741 | 0.28079 | 0.18119 | 0.17475 | 0.18118 | 0.38564 | 0.18118 | 0.53655 |
| 0.21752 | 0.28115 | 0.18128 | 0.17493 | 0.18127 | 0.3861  | 0.18127 | 0.53737 |
| 0.21764 | 0.28161 | 0.18137 | 0.17521 | 0.18136 | 0.38664 | 0.18136 | 0.53828 |
| 0.21774 | 0.28179 | 0.18147 | 0.17567 | 0.18146 | 0.38664 | 0.18146 | 0.53901 |
| 0.21786 | 0.2817  | 0.18155 | 0.17576 | 0.18155 | 0.3871  | 0.18155 | 0.53937 |
| 0.21796 | 0.28207 | 0.18165 | 0.17594 | 0.18164 | 0.38746 | 0.18164 | 0.53964 |
| 0.21808 | 0.28252 | 0.18174 | 0.17612 | 0.18173 | 0.3881  | 0.18174 | 0.53992 |
| 0.21819 | 0.2828  | 0.18183 | 0.17621 | 0.18183 | 0.38864 | 0.18183 | 0.54037 |
| 0.2183  | 0.2828  | 0.18193 | 0.1763  | 0.18192 | 0.38892 | 0.18192 | 0.54056 |
| 0.21841 | 0.28334 | 0.18202 | 0.1763  | 0.18201 | 0.38919 | 0.18201 | 0.54065 |
| 0.21852 | 0.28353 | 0.18211 | 0.17658 | 0.18211 | 0.38947 | 0.18211 | 0.54146 |
| 0.21863 | 0.28362 | 0.1822  | 0.17694 | 0.1822  | 0.38992 | 0.1822  | 0.54201 |
| 0.21874 | 0.28416 | 0.1823  | 0.1773  | 0.18229 | 0.3902  | 0.18229 | 0.54211 |
| 0.21885 | 0.28425 | 0.18239 | 0.17712 | 0.18238 | 0.39047 | 0.18239 | 0.54283 |
| 0.21896 | 0.28434 | 0.18248 | 0.1773  | 0.18247 | 0.39101 | 0.18247 | 0.54302 |
| 0.21908 | 0.28453 | 0.18258 | 0.17776 | 0.18257 | 0.39129 | 0.18257 | 0.54365 |
| 0.21919 | 0.28507 | 0.18266 | 0.17785 | 0.18266 | 0.39174 | 0.18266 | 0.54447 |
| 0.2193  | 0.28534 | 0.18276 | 0.17812 | 0.18275 | 0.39202 | 0.18275 | 0.54447 |
| 0.21941 | 0.28543 | 0.18286 | 0.17821 | 0.18284 | 0.39238 | 0.18285 | 0.54519 |
| 0.21952 | 0.2858  | 0.18294 | 0.17831 | 0.18294 | 0.39301 | 0.18294 | 0.54519 |
| 0.21963 | 0.28635 | 0.18304 | 0.17867 | 0.18303 | 0.39328 | 0.18303 | 0.54538 |
| 0.21975 | 0.28635 | 0.18313 | 0.17867 | 0.18312 | 0.39366 | 0.18312 | 0.54656 |
| 0.21985 | 0.28643 | 0.18322 | 0.17903 | 0.18322 | 0.39374 | 0.18322 | 0.54702 |
| 0.21997 | 0.28707 | 0.18331 | 0.17931 | 0.18331 | 0.3941  | 0.18331 | 0.54711 |
| 0.22007 | 0.28762 | 0.18341 | 0.1794  | 0.1834  | 0.39447 | 0.1834  | 0.54756 |
| 0.22019 | 0.28743 | 0.1835  | 0.17967 | 0.18349 | 0.39502 | 0.1835  | 0.54802 |
| 0.2203  | 0.28734 | 0.18359 | 0.17985 | 0.18359 | 0.39529 | 0.18359 | 0.54811 |
| 0.22041 | 0.28789 | 0.18369 | 0.18012 | 0.18368 | 0.39575 | 0.18368 | 0.54811 |
| 0.22052 | 0.28826 | 0.18378 | 0.18049 | 0.18377 | 0.39611 | 0.18377 | 0.54911 |
| 0.22063 | 0.28853 | 0.18387 | 0.18076 | 0.18386 | 0.39629 | 0.18386 | 0.5492  |
| 0.22075 | 0.28908 | 0.18396 | 0.18085 | 0.18395 | 0.39656 | 0.18395 | 0.54993 |
| 0.22085 | 0.28925 | 0.18406 | 0.18058 | 0.18405 | 0.39684 | 0.18405 | 0.55093 |
| 0.22097 | 0.28916 | 0.18415 | 0.18095 | 0.18414 | 0.39748 | 0.18414 | 0.55066 |
| 0.22108 | 0.28944 | 0.18424 | 0.18122 | 0.18423 | 0.39766 | 0.18423 | 0.5513  |
| 0.22119 | 0.2898  | 0.18434 | 0.18122 | 0.18432 | 0.39821 | 0.18433 | 0.55212 |
| 0.2213  | 0.29017 | 0.18442 | 0.1814  | 0.18442 | 0.39902 | 0.18442 | 0.5523  |
| 0.22141 | 0.29026 | 0.18452 | 0.18176 | 0.18451 | 0.39948 | 0.18451 | 0.55266 |
| 0.22152 | 0.29017 | 0.18461 | 0.18167 | 0.1846  | 0.39948 | 0.18461 | 0.55348 |
| 0.22163 | 0.29062 | 0.18471 | 0.18185 | 0.1847  | 0.40029 | 0.1847  | 0.55375 |
| 0.22174 | 0.29081 | 0.1848  | 0.18231 | 0.18479 | 0.40084 | 0.18479 | 0.55402 |
| 0.22186 | 0.29099 | 0.18489 | 0.18249 | 0.18488 | 0.40102 | 0.18488 | 0.55467 |
| 0.22196 | 0.29126 | 0.18498 | 0.18258 | 0.18498 | 0.40166 | 0.18498 | 0.55512 |
| 0.22208 | 0.29172 | 0.18507 | 0.18268 | 0.18506 | 0.40193 | 0.18506 | 0.55539 |
| 0.22219 | 0.29199 | 0.18517 | 0.18268 | 0.18516 | 0.40193 | 0.18516 | 0.55639 |
| 0.2223  | 0.29208 | 0.18526 | 0.18276 | 0.18525 | 0.40275 | 0.18526 | 0.5563  |
| 0.22241 | 0.29235 | 0.18535 | 0.18322 | 0.18534 | 0.40303 | 0.18534 | 0.55703 |

|         |         |         |         |         |         |         |         |
|---------|---------|---------|---------|---------|---------|---------|---------|
| 0.22252 | 0.2928  | 0.18545 | 0.18331 | 0.18543 | 0.4033  | 0.18544 | 0.55803 |
| 0.22264 | 0.29298 | 0.18554 | 0.18349 | 0.18553 | 0.40376 | 0.18553 | 0.55894 |
| 0.22274 | 0.29317 | 0.18563 | 0.18368 | 0.18563 | 0.4043  | 0.18563 | 0.55958 |
| 0.22286 | 0.29362 | 0.18572 | 0.18395 | 0.18571 | 0.40466 | 0.18571 | 0.56003 |
| 0.22296 | 0.2939  | 0.18582 | 0.18413 | 0.18581 | 0.40494 | 0.18581 | 0.5603  |
| 0.22308 | 0.29426 | 0.18591 | 0.18431 | 0.1859  | 0.40549 | 0.1859  | 0.5604  |
| 0.22318 | 0.29445 | 0.186   | 0.18431 | 0.18599 | 0.40567 | 0.18599 | 0.5614  |
| 0.2233  | 0.29462 | 0.18609 | 0.1845  | 0.18609 | 0.40622 | 0.18609 | 0.56049 |
| 0.22341 | 0.29471 | 0.18619 | 0.18495 | 0.18618 | 0.40631 | 0.18618 | 0.56085 |
| 0.22352 | 0.29481 | 0.18628 | 0.18504 | 0.18627 | 0.40676 | 0.18627 | 0.56168 |
| 0.22363 | 0.29526 | 0.18637 | 0.18513 | 0.18636 | 0.40731 | 0.18637 | 0.56168 |
| 0.22374 | 0.29572 | 0.18646 | 0.18549 | 0.18646 | 0.40776 | 0.18646 | 0.56212 |
| 0.22385 | 0.29581 | 0.18656 | 0.18531 | 0.18654 | 0.40795 | 0.18655 | 0.56249 |
| 0.22397 | 0.2959  | 0.18665 | 0.18558 | 0.18664 | 0.40839 | 0.18664 | 0.56277 |
| 0.22408 | 0.29609 | 0.18674 | 0.18586 | 0.18674 | 0.40858 | 0.18674 | 0.56376 |
| 0.22419 | 0.29609 | 0.18683 | 0.18595 | 0.18682 | 0.40903 | 0.18682 | 0.56422 |
| 0.2243  | 0.29645 | 0.18693 | 0.18632 | 0.18692 | 0.40949 | 0.18692 | 0.56413 |
| 0.22441 | 0.29672 | 0.18702 | 0.18658 | 0.18701 | 0.40994 | 0.18702 | 0.56504 |
| 0.22452 | 0.297   | 0.18711 | 0.18677 | 0.18711 | 0.41049 | 0.18711 | 0.56577 |
| 0.22463 | 0.29709 | 0.18721 | 0.18686 | 0.18719 | 0.41085 | 0.1872  | 0.56577 |
| 0.22475 | 0.29717 | 0.1873  | 0.18732 | 0.18729 | 0.41104 | 0.18729 | 0.5665  |
| 0.22485 | 0.29754 | 0.18739 | 0.1875  | 0.18739 | 0.41131 | 0.18739 | 0.56695 |
| 0.22497 | 0.29781 | 0.18748 | 0.1875  | 0.18747 | 0.41186 | 0.18747 | 0.56722 |
| 0.22507 | 0.29827 | 0.18757 | 0.18768 | 0.18757 | 0.4124  | 0.18757 | 0.56732 |
| 0.22519 | 0.29827 | 0.18767 | 0.18777 | 0.18766 | 0.41249 | 0.18766 | 0.56777 |
| 0.2253  | 0.29873 | 0.18776 | 0.18823 | 0.18775 | 0.41341 | 0.18775 | 0.5684  |
| 0.22541 | 0.29881 | 0.18786 | 0.1884  | 0.18784 | 0.41386 | 0.18785 | 0.56905 |
| 0.22552 | 0.29909 | 0.18794 | 0.18859 | 0.18794 | 0.41395 | 0.18794 | 0.56959 |
| 0.22563 | 0.29964 | 0.18804 | 0.18887 | 0.18803 | 0.41422 | 0.18803 | 0.56986 |
| 0.22575 | 0.29973 | 0.18813 | 0.18887 | 0.18812 | 0.41495 | 0.18813 | 0.57032 |
| 0.22585 | 0.29991 | 0.18822 | 0.18896 | 0.18822 | 0.41522 | 0.18822 | 0.57095 |
| 0.22597 | 0.30036 | 0.18831 | 0.18923 | 0.18831 | 0.41577 | 0.18831 | 0.57132 |
| 0.22608 | 0.30046 | 0.18841 | 0.18941 | 0.1884  | 0.41631 | 0.1884  | 0.57168 |
| 0.22619 | 0.3009  | 0.1885  | 0.18959 | 0.18849 | 0.41649 | 0.18849 | 0.57232 |
| 0.2263  | 0.30109 | 0.18859 | 0.18959 | 0.18858 | 0.41695 | 0.18858 | 0.57278 |
| 0.22641 | 0.30118 | 0.18869 | 0.18995 | 0.18868 | 0.4175  | 0.18868 | 0.57305 |
| 0.22652 | 0.30127 | 0.18878 | 0.19023 | 0.18877 | 0.41768 | 0.18877 | 0.57396 |
| 0.22663 | 0.30136 | 0.18887 | 0.19041 | 0.18887 | 0.41822 | 0.18886 | 0.57387 |
| 0.22674 | 0.30173 | 0.18897 | 0.19041 | 0.18895 | 0.41868 | 0.18896 | 0.57441 |
| 0.22686 | 0.30218 | 0.18906 | 0.19068 | 0.18905 | 0.41914 | 0.18905 | 0.57459 |
| 0.22696 | 0.30246 | 0.18915 | 0.19086 | 0.18914 | 0.4195  | 0.18914 | 0.57533 |
| 0.22708 | 0.30254 | 0.18924 | 0.19105 | 0.18923 | 0.41996 | 0.18923 | 0.57605 |
| 0.22719 | 0.30237 | 0.18934 | 0.19114 | 0.18933 | 0.42023 | 0.18933 | 0.57623 |
| 0.2273  | 0.30291 | 0.18942 | 0.19132 | 0.18942 | 0.42105 | 0.18942 | 0.57632 |
| 0.22741 | 0.30309 | 0.18952 | 0.19169 | 0.18951 | 0.42123 | 0.18951 | 0.5766  |
| 0.22752 | 0.30318 | 0.18961 | 0.19187 | 0.1896  | 0.42169 | 0.18961 | 0.57723 |
| 0.22764 | 0.30364 | 0.1897  | 0.19205 | 0.1897  | 0.42205 | 0.1897  | 0.57796 |
| 0.22774 | 0.30409 | 0.1898  | 0.19241 | 0.18979 | 0.4226  | 0.18979 | 0.57842 |
| 0.22786 | 0.30419 | 0.18989 | 0.19296 | 0.18988 | 0.42305 | 0.18988 | 0.57897 |
| 0.22796 | 0.30446 | 0.18998 | 0.19296 | 0.18998 | 0.42351 | 0.18998 | 0.57933 |
| 0.22808 | 0.30482 | 0.19007 | 0.19287 | 0.19007 | 0.42387 | 0.19007 | 0.57978 |
| 0.22819 | 0.30536 | 0.19017 | 0.19314 | 0.19016 | 0.42396 | 0.19016 | 0.58051 |
| 0.2283  | 0.30536 | 0.19026 | 0.19342 | 0.19025 | 0.42415 | 0.19026 | 0.58079 |
| 0.22841 | 0.30536 | 0.19035 | 0.19378 | 0.19034 | 0.42487 | 0.19034 | 0.58115 |

|         |         |         |         |         |         |         |         |
|---------|---------|---------|---------|---------|---------|---------|---------|
| 0.22852 | 0.30573 | 0.19045 | 0.19378 | 0.19044 | 0.42551 | 0.19044 | 0.58188 |
| 0.22863 | 0.30573 | 0.19054 | 0.19387 | 0.19053 | 0.42587 | 0.19054 | 0.58197 |
| 0.22874 | 0.30591 | 0.19063 | 0.19414 | 0.19062 | 0.42623 | 0.19062 | 0.58288 |
| 0.22885 | 0.30619 | 0.19073 | 0.19423 | 0.19071 | 0.4266  | 0.19072 | 0.5837  |
| 0.22897 | 0.30655 | 0.19081 | 0.19414 | 0.19081 | 0.42742 | 0.19081 | 0.58379 |
| 0.22908 | 0.30727 | 0.19091 | 0.19442 | 0.1909  | 0.4276  | 0.1909  | 0.5847  |
| 0.22919 | 0.30727 | 0.191   | 0.19469 | 0.19099 | 0.4277  | 0.19099 | 0.58498 |
| 0.2293  | 0.3071  | 0.19109 | 0.19487 | 0.19109 | 0.42814 | 0.19109 | 0.58533 |
| 0.22941 | 0.30737 | 0.19118 | 0.19496 | 0.19118 | 0.42851 | 0.19118 | 0.58625 |
| 0.22952 | 0.30773 | 0.19128 | 0.19523 | 0.19127 | 0.42897 | 0.19127 | 0.58725 |
| 0.22963 | 0.308   | 0.19137 | 0.1956  | 0.19136 | 0.42933 | 0.19137 | 0.58752 |
| 0.22975 | 0.30828 | 0.19146 | 0.19596 | 0.19146 | 0.42952 | 0.19146 | 0.58816 |
| 0.22985 | 0.30864 | 0.19156 | 0.19606 | 0.19155 | 0.43006 | 0.19155 | 0.58843 |
| 0.22997 | 0.30873 | 0.19165 | 0.19606 | 0.19164 | 0.43088 | 0.19164 | 0.58871 |
| 0.23007 | 0.30928 | 0.19174 | 0.19614 | 0.19174 | 0.43088 | 0.19174 | 0.58943 |
| 0.23019 | 0.30946 | 0.19183 | 0.19633 | 0.19182 | 0.43097 | 0.19183 | 0.59007 |
| 0.2303  | 0.30955 | 0.19193 | 0.1965  | 0.19192 | 0.43188 | 0.19192 | 0.58988 |
| 0.23041 | 0.30974 | 0.19202 | 0.19696 | 0.19201 | 0.43242 | 0.19201 | 0.5908  |
| 0.23052 | 0.30964 | 0.19211 | 0.19696 | 0.1921  | 0.43288 | 0.1921  | 0.59153 |
| 0.23063 | 0.31046 | 0.19221 | 0.19715 | 0.1922  | 0.43361 | 0.1922  | 0.59189 |
| 0.23075 | 0.31073 | 0.19229 | 0.19732 | 0.19229 | 0.43416 | 0.19229 | 0.59207 |
| 0.23085 | 0.31092 | 0.19239 | 0.1976  | 0.19238 | 0.43443 | 0.19238 | 0.59289 |
| 0.23097 | 0.3111  | 0.19248 | 0.19805 | 0.19247 | 0.4348  | 0.19248 | 0.59298 |
| 0.23108 | 0.31119 | 0.19257 | 0.19824 | 0.19257 | 0.43507 | 0.19257 | 0.59362 |
| 0.23119 | 0.31137 | 0.19267 | 0.19815 | 0.19266 | 0.43534 | 0.19266 | 0.59453 |
| 0.2313  | 0.31155 | 0.19276 | 0.19833 | 0.19275 | 0.43589 | 0.19275 | 0.59462 |
| 0.23141 | 0.31211 | 0.19285 | 0.19851 | 0.19285 | 0.43634 | 0.19285 | 0.59517 |
| 0.23152 | 0.31229 | 0.19294 | 0.1986  | 0.19294 | 0.43689 | 0.19294 | 0.59553 |
| 0.23163 | 0.31274 | 0.19304 | 0.19879 | 0.19303 | 0.4377  | 0.19303 | 0.5958  |
| 0.23174 | 0.31292 | 0.19313 | 0.19924 | 0.19312 | 0.43816 | 0.19313 | 0.59617 |
| 0.23186 | 0.31302 | 0.19322 | 0.19942 | 0.19321 | 0.43852 | 0.19321 | 0.59689 |
| 0.23196 | 0.31328 | 0.19332 | 0.19933 | 0.19331 | 0.43898 | 0.19331 | 0.59726 |
| 0.23208 | 0.31346 | 0.19341 | 0.19969 | 0.1934  | 0.43925 | 0.1934  | 0.59781 |
| 0.23219 | 0.31365 | 0.1935  | 0.19988 | 0.19349 | 0.43935 | 0.19349 | 0.59781 |
| 0.2323  | 0.31392 | 0.19359 | 0.20006 | 0.19358 | 0.43971 | 0.19359 | 0.59799 |
| 0.23241 | 0.31429 | 0.19368 | 0.20042 | 0.19368 | 0.44016 | 0.19368 | 0.59854 |
| 0.23252 | 0.31447 | 0.19378 | 0.20061 | 0.19377 | 0.44071 | 0.19377 | 0.59917 |
| 0.23264 | 0.31493 | 0.19387 | 0.20078 | 0.19386 | 0.44153 | 0.19386 | 0.59944 |
| 0.23274 | 0.31519 | 0.19397 | 0.20087 | 0.19396 | 0.4418  | 0.19396 | 0.60026 |
| 0.23286 | 0.31529 | 0.19405 | 0.20106 | 0.19405 | 0.44235 | 0.19405 | 0.60063 |
| 0.23296 | 0.31556 | 0.19415 | 0.20124 | 0.19414 | 0.44271 | 0.19414 | 0.60099 |
| 0.23308 | 0.31574 | 0.19424 | 0.20142 | 0.19423 | 0.44298 | 0.19424 | 0.60172 |
| 0.23318 | 0.31601 | 0.19433 | 0.20133 | 0.19433 | 0.44326 | 0.19433 | 0.60217 |
| 0.2333  | 0.31638 | 0.19443 | 0.20169 | 0.19441 | 0.44398 | 0.19442 | 0.60272 |
| 0.23341 | 0.31629 | 0.19452 | 0.20233 | 0.19451 | 0.44426 | 0.19451 | 0.60317 |
| 0.23352 | 0.31674 | 0.19461 | 0.20224 | 0.19461 | 0.4449  | 0.19461 | 0.60336 |
| 0.23363 | 0.31711 | 0.1947  | 0.20252 | 0.19469 | 0.44526 | 0.1947  | 0.60327 |
| 0.23374 | 0.31738 | 0.1948  | 0.20269 | 0.19479 | 0.44581 | 0.19479 | 0.6039  |
| 0.23385 | 0.31756 | 0.19489 | 0.20324 | 0.19488 | 0.44626 | 0.19489 | 0.60509 |
| 0.23397 | 0.31784 | 0.19498 | 0.20343 | 0.19498 | 0.44681 | 0.19498 | 0.60527 |
| 0.23408 | 0.31802 | 0.19508 | 0.20343 | 0.19507 | 0.4469  | 0.19507 | 0.60627 |
| 0.23419 | 0.3182  | 0.19516 | 0.2036  | 0.19516 | 0.44754 | 0.19516 | 0.6069  |
| 0.2343  | 0.31884 | 0.19526 | 0.20388 | 0.19525 | 0.4479  | 0.19525 | 0.607   |
| 0.23441 | 0.31911 | 0.19535 | 0.20388 | 0.19534 | 0.44817 | 0.19534 | 0.60718 |

|         |         |         |         |         |         |         |         |
|---------|---------|---------|---------|---------|---------|---------|---------|
| 0.23453 | 0.31911 | 0.19545 | 0.20415 | 0.19544 | 0.44908 | 0.19544 | 0.60791 |
| 0.23463 | 0.3192  | 0.19554 | 0.20425 | 0.19553 | 0.44944 | 0.19553 | 0.60791 |
| 0.23475 | 0.31947 | 0.19563 | 0.20433 | 0.19562 | 0.44963 | 0.19562 | 0.60773 |
| 0.23485 | 0.31993 | 0.19573 | 0.2047  | 0.19572 | 0.45008 | 0.19572 | 0.60864 |
| 0.23497 | 0.3203  | 0.19581 | 0.20497 | 0.19581 | 0.45044 | 0.19581 | 0.60909 |
| 0.23507 | 0.32039 | 0.19591 | 0.20497 | 0.1959  | 0.4509  | 0.1959  | 0.60964 |
| 0.23519 | 0.32057 | 0.19601 | 0.20533 | 0.19599 | 0.45145 | 0.196   | 0.61036 |
| 0.2353  | 0.32093 | 0.19609 | 0.20533 | 0.19609 | 0.45191 | 0.19608 | 0.61073 |
| 0.23541 | 0.32129 | 0.19619 | 0.2057  | 0.19617 | 0.45199 | 0.19618 | 0.61092 |
| 0.23552 | 0.32138 | 0.19628 | 0.20588 | 0.19627 | 0.45236 | 0.19627 | 0.612   |
| 0.23563 | 0.32166 | 0.19637 | 0.20597 | 0.19636 | 0.45273 | 0.19636 | 0.61264 |
| 0.23575 | 0.32184 | 0.19646 | 0.20597 | 0.19646 | 0.45345 | 0.19646 | 0.61309 |
| 0.23585 | 0.32203 | 0.19656 | 0.20625 | 0.19655 | 0.45382 | 0.19655 | 0.61346 |
| 0.23597 | 0.32212 | 0.19665 | 0.20661 | 0.19664 | 0.45454 | 0.19665 | 0.61374 |
| 0.23608 | 0.32266 | 0.19674 | 0.2067  | 0.19673 | 0.45464 | 0.19673 | 0.61474 |
| 0.23619 | 0.32284 | 0.19684 | 0.2067  | 0.19683 | 0.45518 | 0.19683 | 0.61528 |
| 0.2363  | 0.32311 | 0.19692 | 0.20707 | 0.19692 | 0.45564 | 0.19692 | 0.61537 |
| 0.23641 | 0.32339 | 0.19702 | 0.20725 | 0.19701 | 0.45582 | 0.19701 | 0.61564 |
| 0.23652 | 0.32366 | 0.19711 | 0.20734 | 0.1971  | 0.45645 | 0.19711 | 0.6171  |
| 0.23663 | 0.32384 | 0.19721 | 0.20743 | 0.1972  | 0.45737 | 0.1972  | 0.6181  |
| 0.23674 | 0.32402 | 0.1973  | 0.20761 | 0.19729 | 0.45719 | 0.19729 | 0.61819 |
| 0.23686 | 0.32439 | 0.19739 | 0.20789 | 0.19738 | 0.45745 | 0.19738 | 0.61937 |
| 0.23696 | 0.32448 | 0.19748 | 0.20815 | 0.19748 | 0.45791 | 0.19748 | 0.61929 |
| 0.23708 | 0.32457 | 0.19757 | 0.20834 | 0.19757 | 0.45819 | 0.19757 | 0.6201  |
| 0.23719 | 0.32502 | 0.19767 | 0.20798 | 0.19766 | 0.45891 | 0.19766 | 0.62047 |
| 0.2373  | 0.3253  | 0.19776 | 0.20815 | 0.19775 | 0.45955 | 0.19776 | 0.62065 |
| 0.23741 | 0.32576 | 0.19785 | 0.20852 | 0.19784 | 0.46    | 0.19784 | 0.62084 |
| 0.23752 | 0.32566 | 0.19795 | 0.20898 | 0.19793 | 0.46046 | 0.19794 | 0.62166 |
| 0.23764 | 0.32594 | 0.19804 | 0.20916 | 0.19803 | 0.46092 | 0.19803 | 0.6222  |
| 0.23774 | 0.3263  | 0.19813 | 0.20952 | 0.19813 | 0.4611  | 0.19813 | 0.62274 |
| 0.23786 | 0.32658 | 0.19822 | 0.2098  | 0.19821 | 0.46137 | 0.19822 | 0.62301 |
| 0.23796 | 0.32712 | 0.19832 | 0.2097  | 0.19831 | 0.46201 | 0.19831 | 0.62301 |
| 0.23808 | 0.32739 | 0.19841 | 0.2097  | 0.1984  | 0.46247 | 0.19841 | 0.62357 |
| 0.23819 | 0.32767 | 0.1985  | 0.20998 | 0.19849 | 0.4631  | 0.19849 | 0.62411 |
| 0.2383  | 0.32785 | 0.1986  | 0.21053 | 0.19859 | 0.46328 | 0.19859 | 0.62411 |
| 0.23841 | 0.32776 | 0.19868 | 0.21053 | 0.19868 | 0.46373 | 0.19868 | 0.62429 |
| 0.23852 | 0.32831 | 0.19878 | 0.2107  | 0.19877 | 0.46401 | 0.19877 | 0.62511 |
| 0.23863 | 0.32849 | 0.19887 | 0.21098 | 0.19886 | 0.46464 | 0.19887 | 0.62502 |
| 0.23874 | 0.32858 | 0.19896 | 0.21116 | 0.19896 | 0.46519 | 0.19896 | 0.62556 |
| 0.23885 | 0.32885 | 0.19906 | 0.21144 | 0.19905 | 0.46546 | 0.19905 | 0.62565 |
| 0.23897 | 0.32912 | 0.19915 | 0.21171 | 0.19914 | 0.46592 | 0.19914 | 0.62602 |
| 0.23908 | 0.32948 | 0.19924 | 0.2118  | 0.19924 | 0.4661  | 0.19924 | 0.62775 |
| 0.23919 | 0.32976 | 0.19933 | 0.2118  | 0.19933 | 0.46646 | 0.19933 | 0.62811 |
| 0.2393  | 0.33022 | 0.19943 | 0.21198 | 0.19942 | 0.46719 | 0.19942 | 0.62784 |
| 0.23941 | 0.33057 | 0.19952 | 0.21262 | 0.19951 | 0.46747 | 0.19952 | 0.62811 |
| 0.23952 | 0.33049 | 0.19961 | 0.21271 | 0.19961 | 0.46774 | 0.19961 | 0.62893 |
| 0.23963 | 0.33085 | 0.19971 | 0.21289 | 0.19969 | 0.46819 | 0.1997  | 0.62985 |
| 0.23975 | 0.3314  | 0.1998  | 0.21289 | 0.19979 | 0.46847 | 0.19979 | 0.6302  |
| 0.23985 | 0.3313  | 0.19989 | 0.21317 | 0.19988 | 0.46893 | 0.19988 | 0.63094 |
| 0.23997 | 0.33167 | 0.19998 | 0.21344 | 0.19997 | 0.46984 | 0.19998 | 0.63157 |
| 0.24007 | 0.33195 | 0.20007 | 0.21344 | 0.20007 | 0.4701  | 0.20007 | 0.63157 |
| 0.24019 | 0.33195 | 0.20017 | 0.21353 | 0.20016 | 0.4702  | 0.20016 | 0.63184 |
| 0.2403  | 0.33203 | 0.20026 | 0.2139  | 0.20025 | 0.47111 | 0.20025 | 0.63258 |
| 0.24041 | 0.3324  | 0.20035 | 0.21398 | 0.20035 | 0.47138 | 0.20035 | 0.63376 |



|         |         |         |         |         |         |         |         |
|---------|---------|---------|---------|---------|---------|---------|---------|
| 0.24052 | 0.33258 | 0.20044 | 0.21416 | 0.20044 | 0.47166 | 0.20044 | 0.63367 |
| 0.24063 | 0.33276 | 0.20054 | 0.21416 | 0.20053 | 0.47202 | 0.20053 | 0.63385 |
| 0.24075 | 0.33331 | 0.20063 | 0.21462 | 0.20062 | 0.4722  | 0.20063 | 0.63421 |
| 0.24085 | 0.3334  | 0.20072 | 0.21498 | 0.20072 | 0.47284 | 0.20072 | 0.63467 |
| 0.24097 | 0.33349 | 0.20082 | 0.21489 | 0.20081 | 0.47339 | 0.20081 | 0.63576 |
| 0.24108 | 0.33377 | 0.20091 | 0.21498 | 0.2009  | 0.47347 | 0.2009  | 0.63686 |
| 0.24119 | 0.33413 | 0.201   | 0.21489 | 0.201   | 0.47421 | 0.201   | 0.63649 |
| 0.2413  | 0.3344  | 0.20109 | 0.21508 | 0.20108 | 0.47466 | 0.20108 | 0.63686 |
| 0.24141 | 0.33467 | 0.20119 | 0.21563 | 0.20118 | 0.4752  | 0.20118 | 0.6374  |
| 0.24152 | 0.33513 | 0.20128 | 0.21544 | 0.20127 | 0.47538 | 0.20127 | 0.63776 |
| 0.24163 | 0.33549 | 0.20137 | 0.21589 | 0.20136 | 0.47584 | 0.20136 | 0.63858 |
| 0.24174 | 0.33622 | 0.20147 | 0.21608 | 0.20145 | 0.4762  | 0.20146 | 0.63885 |
| 0.24186 | 0.33586 | 0.20155 | 0.21635 | 0.20155 | 0.47666 | 0.20155 | 0.63903 |
| 0.24196 | 0.33604 | 0.20165 | 0.21662 | 0.20164 | 0.47694 | 0.20164 | 0.63959 |
| 0.24208 | 0.33632 | 0.20174 | 0.21698 | 0.20173 | 0.47721 | 0.20173 | 0.64004 |
| 0.24219 | 0.33695 | 0.20183 | 0.21689 | 0.20183 | 0.47766 | 0.20183 | 0.64059 |
| 0.2423  | 0.33723 | 0.20192 | 0.21735 | 0.20192 | 0.47848 | 0.20192 | 0.64104 |
| 0.24241 | 0.33759 | 0.20202 | 0.21744 | 0.20201 | 0.47857 | 0.20201 | 0.64186 |
| 0.24252 | 0.33777 | 0.20211 | 0.21753 | 0.2021  | 0.47903 | 0.20211 | 0.64222 |
| 0.24264 | 0.33805 | 0.2022  | 0.21762 | 0.2022  | 0.47985 | 0.2022  | 0.64195 |
| 0.24274 | 0.33849 | 0.2023  | 0.21771 | 0.20229 | 0.4803  | 0.20229 | 0.6425  |
| 0.24286 | 0.33877 | 0.20239 | 0.2178  | 0.20238 | 0.48039 | 0.20238 | 0.64295 |
| 0.24296 | 0.33886 | 0.20248 | 0.21817 | 0.20247 | 0.48066 | 0.20247 | 0.6435  |
| 0.24308 | 0.33922 | 0.20258 | 0.21835 | 0.20256 | 0.48112 | 0.20257 | 0.64413 |
| 0.24319 | 0.33922 | 0.20267 | 0.21872 | 0.20266 | 0.4813  | 0.20266 | 0.64495 |
| 0.2433  | 0.33931 | 0.20276 | 0.21872 | 0.20275 | 0.4823  | 0.20275 | 0.64568 |
| 0.24341 | 0.33968 | 0.20285 | 0.21881 | 0.20284 | 0.48267 | 0.20284 | 0.64613 |
| 0.24352 | 0.33996 | 0.20295 | 0.21899 | 0.20294 | 0.48303 | 0.20294 | 0.64696 |
| 0.24363 | 0.34022 | 0.20303 | 0.21926 | 0.20303 | 0.48349 | 0.20303 | 0.64759 |
| 0.24374 | 0.34031 | 0.20313 | 0.21926 | 0.20312 | 0.48395 | 0.20312 | 0.64814 |
| 0.24385 | 0.34041 | 0.20323 | 0.21953 | 0.20321 | 0.48467 | 0.20322 | 0.64777 |
| 0.24397 | 0.34077 | 0.20332 | 0.21962 | 0.20331 | 0.48522 | 0.20331 | 0.64805 |
| 0.24408 | 0.34095 | 0.20341 | 0.2198  | 0.2034  | 0.48558 | 0.2034  | 0.64905 |
| 0.24419 | 0.34113 | 0.2035  | 0.2198  | 0.20349 | 0.48586 | 0.20349 | 0.64951 |
| 0.2443  | 0.34141 | 0.20359 | 0.22017 | 0.20359 | 0.48667 | 0.20359 | 0.64959 |
| 0.24441 | 0.34223 | 0.20368 | 0.22053 | 0.20368 | 0.48722 | 0.20368 | 0.65042 |
| 0.24452 | 0.34241 | 0.20378 | 0.2209  | 0.20377 | 0.48722 | 0.20377 | 0.65087 |
| 0.24463 | 0.34223 | 0.20387 | 0.22108 | 0.20386 | 0.48749 | 0.20387 | 0.65123 |
| 0.24475 | 0.34241 | 0.20396 | 0.22099 | 0.20395 | 0.48768 | 0.20395 | 0.65187 |
| 0.24485 | 0.34305 | 0.20406 | 0.22145 | 0.20405 | 0.4884  | 0.20405 | 0.65205 |
| 0.24497 | 0.34323 | 0.20415 | 0.22163 | 0.20414 | 0.48877 | 0.20414 | 0.65296 |
| 0.24507 | 0.3435  | 0.20424 | 0.22154 | 0.20424 | 0.48922 | 0.20424 | 0.65351 |
| 0.24519 | 0.34414 | 0.20434 | 0.22163 | 0.20432 | 0.48959 | 0.20433 | 0.65387 |
| 0.2453  | 0.34432 | 0.20443 | 0.22236 | 0.20442 | 0.49004 | 0.20442 | 0.65378 |
| 0.24541 | 0.34451 | 0.20452 | 0.22244 | 0.20451 | 0.49059 | 0.20451 | 0.65478 |
| 0.24552 | 0.34478 | 0.20461 | 0.22236 | 0.2046  | 0.49086 | 0.2046  | 0.65496 |
| 0.24563 | 0.34496 | 0.20471 | 0.22272 | 0.2047  | 0.49122 | 0.2047  | 0.6556  |
| 0.24575 | 0.34524 | 0.2048  | 0.22272 | 0.20479 | 0.49159 | 0.2048  | 0.65615 |
| 0.24585 | 0.3455  | 0.20489 | 0.22281 | 0.20488 | 0.49204 | 0.20488 | 0.65624 |
| 0.24597 | 0.3456  | 0.20499 | 0.2229  | 0.20497 | 0.49259 | 0.20498 | 0.6567  |
| 0.24608 | 0.34605 | 0.20507 | 0.22336 | 0.20507 | 0.49314 | 0.20507 | 0.65724 |
| 0.24619 | 0.34615 | 0.20517 | 0.22354 | 0.20516 | 0.49359 | 0.20516 | 0.6586  |
| 0.2463  | 0.34687 | 0.20526 | 0.22372 | 0.20525 | 0.49377 | 0.20525 | 0.65888 |
| 0.24641 | 0.3476  | 0.20535 | 0.22409 | 0.20535 | 0.49413 | 0.20535 | 0.65842 |

|         |         |         |         |         |         |         |         |
|---------|---------|---------|---------|---------|---------|---------|---------|
| 0.24652 | 0.3476  | 0.20544 | 0.22418 | 0.20543 | 0.49477 | 0.20544 | 0.65934 |
| 0.24664 | 0.3476  | 0.20554 | 0.22427 | 0.20553 | 0.49532 | 0.20553 | 0.66006 |
| 0.24674 | 0.34732 | 0.20563 | 0.22454 | 0.20562 | 0.49577 | 0.20563 | 0.66088 |
| 0.24686 | 0.34742 | 0.20572 | 0.22464 | 0.20572 | 0.49605 | 0.20572 | 0.66152 |
| 0.24696 | 0.34797 | 0.20582 | 0.22473 | 0.20581 | 0.49659 | 0.20581 | 0.66215 |
| 0.24708 | 0.34805 | 0.20591 | 0.22499 | 0.2059  | 0.49714 | 0.2059  | 0.66288 |
| 0.24719 | 0.34842 | 0.206   | 0.22527 | 0.206   | 0.49778 | 0.206   | 0.66288 |
| 0.2473  | 0.3486  | 0.2061  | 0.22563 | 0.20608 | 0.49796 | 0.20609 | 0.66334 |
| 0.24741 | 0.34869 | 0.20618 | 0.22572 | 0.20618 | 0.49814 | 0.20618 | 0.66398 |
| 0.24752 | 0.34933 | 0.20628 | 0.22554 | 0.20627 | 0.49869 | 0.20627 | 0.66434 |
| 0.24764 | 0.34951 | 0.20637 | 0.22581 | 0.20636 | 0.49923 | 0.20636 | 0.66425 |
| 0.24774 | 0.3496  | 0.20647 | 0.226   | 0.20646 | 0.49969 | 0.20646 | 0.66543 |
| 0.24786 | 0.34988 | 0.20655 | 0.22609 | 0.20655 | 0.50023 | 0.20655 | 0.66607 |
| 0.24796 | 0.34997 | 0.20665 | 0.22609 | 0.20664 | 0.50041 | 0.20664 | 0.66598 |
| 0.24808 | 0.35042 | 0.20675 | 0.22618 | 0.20673 | 0.50078 | 0.20674 | 0.66625 |
| 0.24819 | 0.35042 | 0.20683 | 0.22636 | 0.20683 | 0.50142 | 0.20683 | 0.66671 |
| 0.2483  | 0.3507  | 0.20693 | 0.22664 | 0.20692 | 0.50205 | 0.20692 | 0.66725 |
| 0.24841 | 0.35133 | 0.20702 | 0.22691 | 0.20701 | 0.50242 | 0.20701 | 0.66834 |
| 0.24852 | 0.3517  | 0.20711 | 0.22709 | 0.20711 | 0.50278 | 0.20711 | 0.66889 |
| 0.24863 | 0.3516  | 0.2072  | 0.22736 | 0.20719 | 0.50288 | 0.2072  | 0.66917 |
| 0.24874 | 0.35197 | 0.2073  | 0.22746 | 0.20729 | 0.50351 | 0.20729 | 0.66952 |
| 0.24885 | 0.35252 | 0.20739 | 0.22754 | 0.20738 | 0.50369 | 0.20739 | 0.67026 |
| 0.24897 | 0.35252 | 0.20748 | 0.22763 | 0.20748 | 0.50406 | 0.20748 | 0.67098 |
| 0.24908 | 0.35297 | 0.20758 | 0.22754 | 0.20756 | 0.5046  | 0.20757 | 0.67135 |
| 0.24919 | 0.35315 | 0.20767 | 0.22782 | 0.20766 | 0.50497 | 0.20766 | 0.67171 |
| 0.2493  | 0.35361 | 0.20776 | 0.228   | 0.20775 | 0.50542 | 0.20775 | 0.67226 |
| 0.24941 | 0.35388 | 0.20785 | 0.22827 | 0.20784 | 0.50578 | 0.20785 | 0.6729  |
| 0.24952 | 0.35406 | 0.20795 | 0.22864 | 0.20794 | 0.50661 | 0.20794 | 0.67371 |
| 0.24963 | 0.35425 | 0.20804 | 0.22882 | 0.20803 | 0.50688 | 0.20803 | 0.67362 |
| 0.24975 | 0.3546  | 0.20813 | 0.22891 | 0.20812 | 0.50697 | 0.20812 | 0.67426 |
| 0.24985 | 0.3547  | 0.20822 | 0.229   | 0.20822 | 0.5076  | 0.20822 | 0.6749  |
| 0.24997 | 0.35479 | 0.20831 | 0.22937 | 0.20831 | 0.50752 | 0.20831 | 0.6749  |
| 0.25007 | 0.35524 | 0.20841 | 0.22973 | 0.2084  | 0.50779 | 0.2084  | 0.67517 |
| 0.25019 | 0.35552 | 0.2085  | 0.22982 | 0.20849 | 0.50842 | 0.2085  | 0.67636 |
| 0.2503  | 0.35533 | 0.20859 | 0.23    | 0.20859 | 0.50906 | 0.20859 | 0.67726 |
| 0.25041 | 0.35588 | 0.20869 | 0.22992 | 0.20868 | 0.50997 | 0.20868 | 0.67726 |
| 0.25052 | 0.35615 | 0.20878 | 0.23018 | 0.20877 | 0.51061 | 0.20877 | 0.67699 |
| 0.25063 | 0.35652 | 0.20887 | 0.23036 | 0.20887 | 0.51098 | 0.20887 | 0.67791 |
| 0.25075 | 0.35688 | 0.20896 | 0.23046 | 0.20896 | 0.51125 | 0.20896 | 0.6789  |
| 0.25085 | 0.35724 | 0.20906 | 0.2311  | 0.20905 | 0.51134 | 0.20905 | 0.67936 |
| 0.25097 | 0.35734 | 0.20915 | 0.23127 | 0.20914 | 0.51197 | 0.20915 | 0.67954 |
| 0.25108 | 0.35789 | 0.20924 | 0.231   | 0.20923 | 0.51197 | 0.20923 | 0.68009 |
| 0.25119 | 0.35807 | 0.20934 | 0.23119 | 0.20933 | 0.51234 | 0.20933 | 0.68009 |
| 0.2513  | 0.35798 | 0.20942 | 0.23173 | 0.20942 | 0.51307 | 0.20942 | 0.68117 |
| 0.25141 | 0.35834 | 0.20952 | 0.23183 | 0.20951 | 0.51352 | 0.20951 | 0.68154 |
| 0.25152 | 0.35861 | 0.20962 | 0.23191 | 0.2096  | 0.51388 | 0.20961 | 0.68173 |
| 0.25163 | 0.35906 | 0.2097  | 0.23255 | 0.2097  | 0.51407 | 0.2097  | 0.68227 |
| 0.25174 | 0.35915 | 0.2098  | 0.23264 | 0.20979 | 0.51416 | 0.20979 | 0.68291 |
| 0.25186 | 0.35925 | 0.20989 | 0.23274 | 0.20988 | 0.51461 | 0.20988 | 0.68345 |
| 0.25196 | 0.35971 | 0.20998 | 0.23255 | 0.20998 | 0.51516 | 0.20998 | 0.68391 |
| 0.25208 | 0.3598  | 0.21007 | 0.23291 | 0.21007 | 0.51571 | 0.21007 | 0.68472 |
| 0.25219 | 0.36025 | 0.21017 | 0.2331  | 0.21016 | 0.51607 | 0.21016 | 0.68463 |
| 0.2523  | 0.36071 | 0.21026 | 0.23318 | 0.21025 | 0.5168  | 0.21026 | 0.68472 |
| 0.25241 | 0.36107 | 0.21035 | 0.23355 | 0.21034 | 0.51698 | 0.21034 | 0.68591 |

|         |         |         |         |         |         |         |         |
|---------|---------|---------|---------|---------|---------|---------|---------|
| 0.25252 | 0.36135 | 0.21045 | 0.23355 | 0.21044 | 0.51735 | 0.21044 | 0.68637 |
| 0.25264 | 0.36162 | 0.21054 | 0.23373 | 0.21053 | 0.51762 | 0.21053 | 0.68682 |
| 0.25274 | 0.36198 | 0.21063 | 0.23401 | 0.21062 | 0.51789 | 0.21062 | 0.68764 |
| 0.25286 | 0.36243 | 0.21072 | 0.23437 | 0.21071 | 0.51844 | 0.21072 | 0.68801 |
| 0.25296 | 0.36235 | 0.21082 | 0.23456 | 0.21081 | 0.51898 | 0.21081 | 0.68828 |
| 0.25308 | 0.36243 | 0.21091 | 0.23492 | 0.2109  | 0.51926 | 0.21091 | 0.68873 |
| 0.25319 | 0.36261 | 0.211   | 0.23519 | 0.21099 | 0.51981 | 0.21099 | 0.68928 |
| 0.2533  | 0.3628  | 0.21109 | 0.23519 | 0.21109 | 0.51981 | 0.21109 | 0.69001 |
| 0.25341 | 0.36344 | 0.21118 | 0.23519 | 0.21118 | 0.52026 | 0.21118 | 0.69037 |
| 0.25352 | 0.36389 | 0.21128 | 0.23538 | 0.21127 | 0.5209  | 0.21127 | 0.69046 |
| 0.25363 | 0.36389 | 0.21137 | 0.23555 | 0.21136 | 0.52144 | 0.21137 | 0.69128 |
| 0.25374 | 0.36408 | 0.21146 | 0.23574 | 0.21146 | 0.5218  | 0.21146 | 0.69192 |
| 0.25385 | 0.36425 | 0.21156 | 0.23601 | 0.21154 | 0.52226 | 0.21155 | 0.6921  |
| 0.25397 | 0.36453 | 0.21165 | 0.2361  | 0.21164 | 0.52281 | 0.21164 | 0.69247 |
| 0.25408 | 0.36489 | 0.21174 | 0.23628 | 0.21174 | 0.52308 | 0.21174 | 0.69319 |
| 0.25419 | 0.36553 | 0.21183 | 0.23646 | 0.21182 | 0.52336 | 0.21182 | 0.69374 |
| 0.2543  | 0.36571 | 0.21193 | 0.23692 | 0.21192 | 0.52408 | 0.21192 | 0.69465 |
| 0.25441 | 0.3658  | 0.21202 | 0.2372  | 0.21201 | 0.52426 | 0.21202 | 0.69502 |
| 0.25452 | 0.36571 | 0.21211 | 0.23729 | 0.2121  | 0.52481 | 0.2121  | 0.69565 |
| 0.25463 | 0.36626 | 0.21221 | 0.23747 | 0.2122  | 0.52508 | 0.2122  | 0.69546 |
| 0.25475 | 0.36689 | 0.2123  | 0.23774 | 0.21229 | 0.52554 | 0.21229 | 0.69583 |
| 0.25485 | 0.36707 | 0.21239 | 0.23792 | 0.21238 | 0.52609 | 0.21238 | 0.69656 |
| 0.25497 | 0.36753 | 0.21248 | 0.23792 | 0.21247 | 0.52645 | 0.21247 | 0.69656 |
| 0.25507 | 0.36726 | 0.21258 | 0.23811 | 0.21257 | 0.52672 | 0.21257 | 0.69692 |
| 0.25519 | 0.36744 | 0.21267 | 0.23846 | 0.21266 | 0.527   | 0.21266 | 0.69775 |
| 0.2553  | 0.36781 | 0.21276 | 0.23856 | 0.21275 | 0.52727 | 0.21275 | 0.69811 |
| 0.25541 | 0.36826 | 0.21285 | 0.23883 | 0.21285 | 0.52791 | 0.21285 | 0.69847 |
| 0.25552 | 0.36872 | 0.21294 | 0.23911 | 0.21294 | 0.52817 | 0.21294 | 0.69947 |
| 0.25563 | 0.36917 | 0.21304 | 0.23937 | 0.21303 | 0.52817 | 0.21303 | 0.69993 |
| 0.25575 | 0.36945 | 0.21314 | 0.23947 | 0.21312 | 0.52882 | 0.21313 | 0.70065 |
| 0.25585 | 0.36972 | 0.21322 | 0.23965 | 0.21322 | 0.52945 | 0.21322 | 0.70084 |
| 0.25597 | 0.36963 | 0.21332 | 0.24002 | 0.2133  | 0.52954 | 0.21331 | 0.70138 |
| 0.25608 | 0.36999 | 0.21341 | 0.2402  | 0.2134  | 0.53009 | 0.2134  | 0.70184 |
| 0.25619 | 0.37044 | 0.2135  | 0.24029 | 0.2135  | 0.53063 | 0.2135  | 0.70266 |
| 0.2563  | 0.37072 | 0.21359 | 0.24056 | 0.21359 | 0.53091 | 0.21359 | 0.70293 |
| 0.25641 | 0.37081 | 0.21369 | 0.24074 | 0.21368 | 0.53118 | 0.21368 | 0.7032  |
| 0.25652 | 0.37117 | 0.21377 | 0.24101 | 0.21377 | 0.53172 | 0.21377 | 0.70357 |
| 0.25664 | 0.37117 | 0.21387 | 0.24129 | 0.21386 | 0.532   | 0.21386 | 0.70421 |
| 0.25674 | 0.37172 | 0.21397 | 0.24156 | 0.21395 | 0.53255 | 0.21396 | 0.70439 |
| 0.25686 | 0.37226 | 0.21406 | 0.24183 | 0.21405 | 0.53282 | 0.21405 | 0.70494 |
| 0.25696 | 0.37226 | 0.21415 | 0.24193 | 0.21414 | 0.53346 | 0.21414 | 0.70566 |
| 0.25708 | 0.37263 | 0.21424 | 0.24193 | 0.21423 | 0.53373 | 0.21424 | 0.70648 |
| 0.25719 | 0.37281 | 0.21434 | 0.24229 | 0.21433 | 0.53418 | 0.21433 | 0.70703 |
| 0.2573  | 0.3729  | 0.21443 | 0.24275 | 0.21442 | 0.534   | 0.21442 | 0.70721 |
| 0.25741 | 0.37317 | 0.21452 | 0.24238 | 0.21451 | 0.53436 | 0.21451 | 0.70812 |
| 0.25752 | 0.37345 | 0.21462 | 0.24275 | 0.2146  | 0.53491 | 0.21461 | 0.70849 |
| 0.25764 | 0.37382 | 0.2147  | 0.24293 | 0.2147  | 0.53491 | 0.2147  | 0.70903 |
| 0.25774 | 0.37427 | 0.2148  | 0.24293 | 0.21479 | 0.53564 | 0.21479 | 0.7093  |
| 0.25786 | 0.37436 | 0.21489 | 0.24329 | 0.21488 | 0.53601 | 0.21489 | 0.70985 |
| 0.25796 | 0.37436 | 0.21498 | 0.24365 | 0.21497 | 0.53646 | 0.21497 | 0.71003 |
| 0.25808 | 0.37473 | 0.21507 | 0.24402 | 0.21507 | 0.53673 | 0.21507 | 0.71031 |
| 0.25819 | 0.37482 | 0.21517 | 0.24429 | 0.21516 | 0.53755 | 0.21516 | 0.71085 |
| 0.2583  | 0.37508 | 0.21526 | 0.24438 | 0.21525 | 0.53809 | 0.21526 | 0.71148 |
| 0.25841 | 0.37563 | 0.21535 | 0.24447 | 0.21534 | 0.53782 | 0.21534 | 0.71185 |

|         |         |         |         |         |         |         |         |
|---------|---------|---------|---------|---------|---------|---------|---------|
| 0.25852 | 0.37582 | 0.21545 | 0.24465 | 0.21544 | 0.53837 | 0.21544 | 0.71267 |
| 0.25863 | 0.376   | 0.21553 | 0.24484 | 0.21553 | 0.53883 | 0.21553 | 0.71304 |
| 0.25874 | 0.37645 | 0.21563 | 0.24511 | 0.21562 | 0.5391  | 0.21562 | 0.71358 |
| 0.25885 | 0.37664 | 0.21573 | 0.24511 | 0.21571 | 0.53964 | 0.21572 | 0.71367 |
| 0.25897 | 0.37673 | 0.21582 | 0.24557 | 0.21581 | 0.5401  | 0.21581 | 0.71431 |
| 0.25908 | 0.37745 | 0.21591 | 0.24593 | 0.2159  | 0.54037 | 0.2159  | 0.71504 |
| 0.25919 | 0.37791 | 0.216   | 0.24584 | 0.21599 | 0.54083 | 0.21599 | 0.71604 |
| 0.2593  | 0.37818 | 0.21609 | 0.24602 | 0.21609 | 0.54119 | 0.21609 | 0.71613 |
| 0.25941 | 0.37845 | 0.21619 | 0.24647 | 0.21618 | 0.54165 | 0.21618 | 0.71686 |
| 0.25952 | 0.37854 | 0.21628 | 0.24647 | 0.21627 | 0.54201 | 0.21627 | 0.7174  |
| 0.25963 | 0.37863 | 0.21637 | 0.24684 | 0.21636 | 0.54237 | 0.21637 | 0.71786 |
| 0.25975 | 0.37909 | 0.21646 | 0.24702 | 0.21645 | 0.54265 | 0.21645 | 0.71868 |
| 0.25985 | 0.37946 | 0.21656 | 0.24684 | 0.21655 | 0.54302 | 0.21655 | 0.71859 |
| 0.25997 | 0.37955 | 0.21665 | 0.24693 | 0.21664 | 0.54311 | 0.21665 | 0.71877 |
| 0.26007 | 0.37991 | 0.21674 | 0.24729 | 0.21674 | 0.54365 | 0.21674 | 0.71959 |
| 0.26019 | 0.38018 | 0.21684 | 0.24747 | 0.21682 | 0.5441  | 0.21683 | 0.72041 |
| 0.2603  | 0.38064 | 0.21693 | 0.24784 | 0.21692 | 0.54456 | 0.21692 | 0.72086 |
| 0.26041 | 0.38073 | 0.21702 | 0.24803 | 0.21701 | 0.5451  | 0.21702 | 0.72177 |
| 0.26052 | 0.38082 | 0.21711 | 0.24803 | 0.2171  | 0.54538 | 0.2171  | 0.72214 |
| 0.26063 | 0.381   | 0.21721 | 0.2483  | 0.2172  | 0.54565 | 0.2172  | 0.72241 |
| 0.26075 | 0.38146 | 0.21729 | 0.24876 | 0.21729 | 0.54602 | 0.21729 | 0.72278 |
| 0.26085 | 0.38173 | 0.21739 | 0.24857 | 0.21738 | 0.54656 | 0.21738 | 0.72313 |
| 0.26097 | 0.38191 | 0.21748 | 0.24876 | 0.21747 | 0.5472  | 0.21748 | 0.72341 |
| 0.26108 | 0.38201 | 0.21757 | 0.2493  | 0.21757 | 0.54738 | 0.21757 | 0.72451 |
| 0.26119 | 0.38255 | 0.21767 | 0.24975 | 0.21766 | 0.54792 | 0.21766 | 0.72487 |
| 0.2613  | 0.38283 | 0.21776 | 0.24984 | 0.21775 | 0.5482  | 0.21775 | 0.72532 |
| 0.26141 | 0.38318 | 0.21785 | 0.24975 | 0.21785 | 0.54875 | 0.21785 | 0.72587 |
| 0.26152 | 0.38328 | 0.21794 | 0.25012 | 0.21794 | 0.5492  | 0.21794 | 0.72678 |
| 0.26164 | 0.38364 | 0.21804 | 0.2503  | 0.21803 | 0.54984 | 0.21803 | 0.72714 |
| 0.26174 | 0.38383 | 0.21813 | 0.25039 | 0.21812 | 0.55048 | 0.21813 | 0.7276  |
| 0.26186 | 0.38446 | 0.21822 | 0.25058 | 0.21822 | 0.55057 | 0.21822 | 0.72824 |
| 0.26196 | 0.38437 | 0.21832 | 0.25094 | 0.21831 | 0.55066 | 0.21831 | 0.72887 |
| 0.26208 | 0.38465 | 0.21841 | 0.2513  | 0.2184  | 0.55093 | 0.2184  | 0.72896 |
| 0.26219 | 0.385   | 0.2185  | 0.25166 | 0.21849 | 0.55157 | 0.21849 | 0.7296  |
| 0.2623  | 0.3851  | 0.21859 | 0.25158 | 0.21858 | 0.55166 | 0.21859 | 0.73051 |
| 0.26241 | 0.38547 | 0.21868 | 0.25166 | 0.21868 | 0.55212 | 0.21868 | 0.73142 |
| 0.26252 | 0.38582 | 0.21878 | 0.25185 | 0.21877 | 0.55257 | 0.21877 | 0.73169 |
| 0.26264 | 0.38591 | 0.21887 | 0.25212 | 0.21886 | 0.55284 | 0.21886 | 0.73197 |
| 0.26274 | 0.38655 | 0.21896 | 0.2524  | 0.21896 | 0.55366 | 0.21896 | 0.73242 |
| 0.26286 | 0.38692 | 0.21905 | 0.25267 | 0.21905 | 0.55384 | 0.21905 | 0.73306 |
| 0.26296 | 0.38673 | 0.21915 | 0.25267 | 0.21914 | 0.55411 | 0.21914 | 0.7337  |
| 0.26308 | 0.3871  | 0.21925 | 0.25285 | 0.21923 | 0.55439 | 0.21924 | 0.73397 |
| 0.26319 | 0.38737 | 0.21933 | 0.25322 | 0.21933 | 0.55485 | 0.21933 | 0.73434 |
| 0.2633  | 0.38756 | 0.21943 | 0.25348 | 0.21942 | 0.55521 | 0.21942 | 0.73461 |
| 0.26341 | 0.38783 | 0.21952 | 0.25339 | 0.21951 | 0.55566 | 0.21951 | 0.73533 |
| 0.26352 | 0.38811 | 0.21961 | 0.25385 | 0.21961 | 0.55621 | 0.21961 | 0.73606 |
| 0.26363 | 0.38846 | 0.2197  | 0.25412 | 0.21969 | 0.55621 | 0.2197  | 0.73643 |
| 0.26375 | 0.38901 | 0.2198  | 0.25421 | 0.21979 | 0.55694 | 0.21979 | 0.73716 |
| 0.26385 | 0.38892 | 0.21989 | 0.25439 | 0.21988 | 0.55766 | 0.21988 | 0.7377  |
| 0.26397 | 0.3891  | 0.21998 | 0.25476 | 0.21997 | 0.55766 | 0.21997 | 0.7387  |
| 0.26408 | 0.38965 | 0.22008 | 0.25494 | 0.22007 | 0.55794 | 0.22007 | 0.73924 |
| 0.26419 | 0.3902  | 0.22016 | 0.25521 | 0.22016 | 0.55867 | 0.22016 | 0.73943 |
| 0.2643  | 0.39038 | 0.22026 | 0.2553  | 0.22025 | 0.55885 | 0.22025 | 0.73962 |
| 0.26441 | 0.39056 | 0.22036 | 0.25549 | 0.22034 | 0.55922 | 0.22035 | 0.74079 |

|         |         |         |         |         |         |         |         |
|---------|---------|---------|---------|---------|---------|---------|---------|
| 0.26453 | 0.39074 | 0.22044 | 0.25567 | 0.22044 | 0.55958 | 0.22044 | 0.74089 |
| 0.26463 | 0.3911  | 0.22054 | 0.25604 | 0.22053 | 0.55976 | 0.22053 | 0.74107 |
| 0.26475 | 0.39138 | 0.22063 | 0.25613 | 0.22062 | 0.5604  | 0.22062 | 0.74143 |
| 0.26485 | 0.39129 | 0.22072 | 0.25631 | 0.22072 | 0.56103 | 0.22072 | 0.74216 |
| 0.26497 | 0.39174 | 0.22081 | 0.25649 | 0.22081 | 0.56121 | 0.22081 | 0.74261 |
| 0.26507 | 0.3922  | 0.22091 | 0.25658 | 0.2209  | 0.56158 | 0.2209  | 0.74325 |
| 0.26519 | 0.39229 | 0.22101 | 0.25695 | 0.22099 | 0.56186 | 0.221   | 0.74352 |
| 0.2653  | 0.39256 | 0.22109 | 0.25721 | 0.22109 | 0.56258 | 0.22108 | 0.74371 |
| 0.26541 | 0.39275 | 0.22119 | 0.25749 | 0.22118 | 0.56304 | 0.22118 | 0.74444 |
| 0.26552 | 0.3932  | 0.22128 | 0.2574  | 0.22127 | 0.56313 | 0.22127 | 0.74507 |
| 0.26563 | 0.3932  | 0.22137 | 0.25767 | 0.22136 | 0.56367 | 0.22136 | 0.74526 |
| 0.26575 | 0.39338 | 0.22146 | 0.25813 | 0.22145 | 0.56404 | 0.22146 | 0.74607 |
| 0.26585 | 0.39374 | 0.22156 | 0.25822 | 0.22155 | 0.56441 | 0.22155 | 0.74625 |
| 0.26597 | 0.39374 | 0.22165 | 0.2584  | 0.22164 | 0.56513 | 0.22164 | 0.74625 |
| 0.26608 | 0.39438 | 0.22174 | 0.25849 | 0.22173 | 0.56532 | 0.22173 | 0.74717 |
| 0.26619 | 0.39484 | 0.22184 | 0.25877 | 0.22183 | 0.56568 | 0.22183 | 0.7478  |
| 0.2663  | 0.39465 | 0.22193 | 0.25849 | 0.22192 | 0.56604 | 0.22192 | 0.74835 |
| 0.26641 | 0.3952  | 0.22202 | 0.25886 | 0.22201 | 0.5664  | 0.22201 | 0.74926 |
| 0.26652 | 0.39557 | 0.22211 | 0.25922 | 0.2221  | 0.56722 | 0.22211 | 0.74954 |
| 0.26663 | 0.39557 | 0.2222  | 0.2594  | 0.2222  | 0.5674  | 0.2222  | 0.75026 |
| 0.26674 | 0.39575 | 0.2223  | 0.2594  | 0.22229 | 0.56804 | 0.22229 | 0.75117 |
| 0.26686 | 0.3962  | 0.22239 | 0.25986 | 0.22238 | 0.5685  | 0.22238 | 0.75135 |
| 0.26696 | 0.39647 | 0.22248 | 0.26013 | 0.22248 | 0.5685  | 0.22248 | 0.75199 |
| 0.26708 | 0.39693 | 0.22257 | 0.26013 | 0.22256 | 0.56886 | 0.22256 | 0.75281 |
| 0.26719 | 0.39729 | 0.22267 | 0.26022 | 0.22266 | 0.56977 | 0.22266 | 0.75309 |
| 0.2673  | 0.39729 | 0.22276 | 0.2605  | 0.22275 | 0.56986 | 0.22276 | 0.75344 |
| 0.26741 | 0.39729 | 0.22285 | 0.26076 | 0.22285 | 0.57032 | 0.22285 | 0.7539  |
| 0.26752 | 0.39812 | 0.22295 | 0.26113 | 0.22293 | 0.57032 | 0.22294 | 0.75472 |
| 0.26764 | 0.39839 | 0.22304 | 0.26158 | 0.22303 | 0.57059 | 0.22303 | 0.75472 |
| 0.26774 | 0.39821 | 0.22313 | 0.26186 | 0.22312 | 0.57095 | 0.22312 | 0.75526 |
| 0.26786 | 0.39884 | 0.22322 | 0.26186 | 0.22321 | 0.57122 | 0.22322 | 0.75554 |
| 0.26796 | 0.3993  | 0.22332 | 0.26213 | 0.22331 | 0.57178 | 0.22331 | 0.75617 |
| 0.26808 | 0.39939 | 0.22341 | 0.26223 | 0.2234  | 0.57223 | 0.22341 | 0.75681 |
| 0.26819 | 0.39948 | 0.2235  | 0.26232 | 0.22349 | 0.57241 | 0.22349 | 0.75727 |
| 0.2683  | 0.39948 | 0.2236  | 0.2624  | 0.22359 | 0.5726  | 0.22359 | 0.75791 |
| 0.26841 | 0.39985 | 0.22369 | 0.26286 | 0.22368 | 0.57305 | 0.22368 | 0.75881 |
| 0.26852 | 0.40003 | 0.22378 | 0.26286 | 0.22377 | 0.57386 | 0.22377 | 0.75927 |
| 0.26863 | 0.4003  | 0.22387 | 0.26286 | 0.22386 | 0.57396 | 0.22387 | 0.75954 |
| 0.26874 | 0.40067 | 0.22396 | 0.26322 | 0.22396 | 0.57433 | 0.22396 | 0.76018 |
| 0.26885 | 0.40093 | 0.22406 | 0.2634  | 0.22404 | 0.57469 | 0.22405 | 0.76073 |
| 0.26897 | 0.40102 | 0.22415 | 0.26377 | 0.22414 | 0.57514 | 0.22414 | 0.76118 |
| 0.26908 | 0.40139 | 0.22424 | 0.26414 | 0.22424 | 0.57569 | 0.22424 | 0.762   |
| 0.26919 | 0.40167 | 0.22433 | 0.26432 | 0.22433 | 0.57596 | 0.22433 | 0.76209 |
| 0.2693  | 0.40175 | 0.22443 | 0.26441 | 0.22442 | 0.57632 | 0.22442 | 0.76245 |
| 0.26941 | 0.40212 | 0.22452 | 0.2645  | 0.22451 | 0.5766  | 0.22452 | 0.76319 |
| 0.26952 | 0.40239 | 0.22461 | 0.26459 | 0.22461 | 0.57696 | 0.22461 | 0.76355 |
| 0.26963 | 0.40257 | 0.22471 | 0.26496 | 0.22469 | 0.57732 | 0.2247  | 0.7641  |
| 0.26975 | 0.40257 | 0.2248  | 0.26504 | 0.22479 | 0.57787 | 0.22479 | 0.76437 |
| 0.26985 | 0.40294 | 0.22489 | 0.26531 | 0.22489 | 0.57833 | 0.22489 | 0.765   |
| 0.26997 | 0.40339 | 0.22498 | 0.26541 | 0.22497 | 0.5786  | 0.22498 | 0.76528 |
| 0.27007 | 0.40376 | 0.22508 | 0.26577 | 0.22507 | 0.57897 | 0.22507 | 0.76582 |
| 0.27019 | 0.40412 | 0.22517 | 0.26623 | 0.22516 | 0.57942 | 0.22516 | 0.76619 |
| 0.2703  | 0.40439 | 0.22526 | 0.2665  | 0.22525 | 0.5796  | 0.22525 | 0.76655 |
| 0.27041 | 0.40485 | 0.22536 | 0.26641 | 0.22535 | 0.57996 | 0.22535 | 0.76774 |

|         |         |         |         |         |         |         |         |
|---------|---------|---------|---------|---------|---------|---------|---------|
| 0.27052 | 0.40521 | 0.22544 | 0.26678 | 0.22544 | 0.58024 | 0.22544 | 0.7681  |
| 0.27063 | 0.40521 | 0.22554 | 0.26705 | 0.22553 | 0.58042 | 0.22553 | 0.76837 |
| 0.27075 | 0.40567 | 0.22563 | 0.26696 | 0.22562 | 0.58087 | 0.22563 | 0.76901 |
| 0.27085 | 0.40603 | 0.22572 | 0.26741 | 0.22572 | 0.58152 | 0.22572 | 0.76919 |
| 0.27097 | 0.40603 | 0.22582 | 0.2676  | 0.2258  | 0.58188 | 0.22581 | 0.76938 |
| 0.27108 | 0.4064  | 0.22591 | 0.26768 | 0.2259  | 0.58206 | 0.2259  | 0.76983 |
| 0.27119 | 0.40676 | 0.226   | 0.26787 | 0.226   | 0.58261 | 0.226   | 0.77011 |
| 0.2713  | 0.40712 | 0.22609 | 0.26805 | 0.22609 | 0.5827  | 0.22609 | 0.77074 |
| 0.27141 | 0.40731 | 0.22619 | 0.26823 | 0.22618 | 0.58324 | 0.22618 | 0.77147 |
| 0.27152 | 0.4074  | 0.22628 | 0.26841 | 0.22627 | 0.58351 | 0.22628 | 0.77165 |
| 0.27163 | 0.40776 | 0.22637 | 0.26868 | 0.22636 | 0.58424 | 0.22636 | 0.77237 |
| 0.27174 | 0.40804 | 0.22647 | 0.26896 | 0.22645 | 0.5847  | 0.22646 | 0.77319 |
| 0.27186 | 0.40822 | 0.22656 | 0.26914 | 0.22655 | 0.58507 | 0.22655 | 0.77319 |
| 0.27196 | 0.40849 | 0.22665 | 0.26969 | 0.22664 | 0.58551 | 0.22664 | 0.77356 |
| 0.27208 | 0.40885 | 0.22674 | 0.26996 | 0.22673 | 0.5857  | 0.22674 | 0.77438 |
| 0.27219 | 0.40903 | 0.22683 | 0.26996 | 0.22683 | 0.58615 | 0.22683 | 0.77501 |
| 0.2723  | 0.40922 | 0.22693 | 0.26996 | 0.22692 | 0.58643 | 0.22692 | 0.7752  |
| 0.27241 | 0.40958 | 0.22702 | 0.26996 | 0.22701 | 0.58689 | 0.22701 | 0.77602 |
| 0.27252 | 0.40994 | 0.22711 | 0.27041 | 0.22711 | 0.58734 | 0.22711 | 0.77657 |
| 0.27264 | 0.4104  | 0.2272  | 0.27059 | 0.2272  | 0.58752 | 0.2272  | 0.77702 |
| 0.27274 | 0.41049 | 0.2273  | 0.27087 | 0.22729 | 0.5878  | 0.22729 | 0.77702 |
| 0.27286 | 0.41076 | 0.22739 | 0.27096 | 0.22738 | 0.58843 | 0.22739 | 0.77793 |
| 0.27296 | 0.41094 | 0.22748 | 0.27123 | 0.22748 | 0.58898 | 0.22748 | 0.77847 |
| 0.27308 | 0.41131 | 0.22758 | 0.27141 | 0.22756 | 0.58916 | 0.22757 | 0.77939 |
| 0.27319 | 0.41159 | 0.22767 | 0.2716  | 0.22766 | 0.58962 | 0.22766 | 0.78012 |
| 0.2733  | 0.41186 | 0.22776 | 0.27187 | 0.22775 | 0.59007 | 0.22775 | 0.78057 |
| 0.27341 | 0.41204 | 0.22785 | 0.27224 | 0.22784 | 0.59079 | 0.22784 | 0.78093 |
| 0.27352 | 0.41277 | 0.22795 | 0.27269 | 0.22794 | 0.59079 | 0.22794 | 0.78139 |
| 0.27363 | 0.41258 | 0.22804 | 0.27278 | 0.22803 | 0.59061 | 0.22803 | 0.78212 |
| 0.27374 | 0.41286 | 0.22813 | 0.27314 | 0.22812 | 0.59144 | 0.22812 | 0.78257 |
| 0.27385 | 0.41322 | 0.22823 | 0.27323 | 0.22821 | 0.5918  | 0.22822 | 0.78285 |
| 0.27397 | 0.41322 | 0.22831 | 0.2736  | 0.22831 | 0.59225 | 0.22831 | 0.78357 |
| 0.27408 | 0.41377 | 0.22841 | 0.27387 | 0.2284  | 0.59316 | 0.2284  | 0.7843  |
| 0.27419 | 0.4145  | 0.2285  | 0.27406 | 0.22849 | 0.59334 | 0.22849 | 0.78485 |
| 0.2743  | 0.41477 | 0.2286  | 0.27415 | 0.22859 | 0.59353 | 0.22859 | 0.78512 |
| 0.27441 | 0.41496 | 0.22868 | 0.27442 | 0.22868 | 0.59362 | 0.22868 | 0.78631 |
| 0.27453 | 0.41504 | 0.22878 | 0.2747  | 0.22877 | 0.59416 | 0.22877 | 0.78631 |
| 0.27463 | 0.41541 | 0.22887 | 0.27524 | 0.22886 | 0.59444 | 0.22887 | 0.78648 |
| 0.27475 | 0.41587 | 0.22896 | 0.27524 | 0.22895 | 0.5948  | 0.22895 | 0.78721 |
| 0.27485 | 0.41605 | 0.22906 | 0.27542 | 0.22905 | 0.59535 | 0.22905 | 0.78776 |
| 0.27497 | 0.41631 | 0.22915 | 0.27551 | 0.22914 | 0.5958  | 0.22914 | 0.7883  |
| 0.27507 | 0.41686 | 0.22924 | 0.27542 | 0.22923 | 0.59598 | 0.22923 | 0.78895 |
| 0.27519 | 0.41714 | 0.22934 | 0.2757  | 0.22932 | 0.59653 | 0.22933 | 0.7894  |
| 0.2753  | 0.41723 | 0.22943 | 0.27588 | 0.22942 | 0.59689 | 0.22942 | 0.78967 |
| 0.27541 | 0.41732 | 0.22952 | 0.27605 | 0.22951 | 0.59689 | 0.22952 | 0.79004 |
| 0.27552 | 0.41759 | 0.22961 | 0.27624 | 0.2296  | 0.59717 | 0.2296  | 0.79013 |
| 0.27563 | 0.41777 | 0.22971 | 0.27669 | 0.2297  | 0.59754 | 0.2297  | 0.79077 |
| 0.27575 | 0.41795 | 0.22979 | 0.27687 | 0.22979 | 0.59798 | 0.22979 | 0.79158 |
| 0.27585 | 0.4185  | 0.22989 | 0.27715 | 0.22988 | 0.5989  | 0.22988 | 0.7915  |
| 0.27597 | 0.41895 | 0.22998 | 0.27724 | 0.22997 | 0.59881 | 0.22998 | 0.79168 |
| 0.27608 | 0.41941 | 0.23007 | 0.27733 | 0.23007 | 0.59908 | 0.23007 | 0.79241 |
| 0.27619 | 0.41951 | 0.23017 | 0.2776  | 0.23016 | 0.59962 | 0.23016 | 0.79322 |
| 0.2763  | 0.4196  | 0.23026 | 0.2777  | 0.23025 | 0.60026 | 0.23025 | 0.79386 |
| 0.27641 | 0.41996 | 0.23035 | 0.2776  | 0.23035 | 0.60044 | 0.23035 | 0.79431 |

|         |         |         |         |         |         |         |         |
|---------|---------|---------|---------|---------|---------|---------|---------|
| 0.27652 | 0.42032 | 0.23045 | 0.27806 | 0.23043 | 0.60099 | 0.23044 | 0.7944  |
| 0.27664 | 0.42059 | 0.23054 | 0.27833 | 0.23053 | 0.60153 | 0.23053 | 0.79477 |
| 0.27674 | 0.42059 | 0.23063 | 0.27842 | 0.23062 | 0.60172 | 0.23063 | 0.79523 |
| 0.27686 | 0.42096 | 0.23072 | 0.2786  | 0.23071 | 0.60208 | 0.23071 | 0.79549 |
| 0.27696 | 0.42114 | 0.23082 | 0.27924 | 0.23081 | 0.60245 | 0.23081 | 0.7964  |
| 0.27708 | 0.42142 | 0.23091 | 0.2797  | 0.2309  | 0.60263 | 0.2309  | 0.79713 |
| 0.27719 | 0.42151 | 0.231   | 0.27942 | 0.23099 | 0.60299 | 0.23099 | 0.79786 |
| 0.2773  | 0.42214 | 0.2311  | 0.2797  | 0.23108 | 0.60354 | 0.23109 | 0.79786 |
| 0.27741 | 0.42224 | 0.23119 | 0.28016 | 0.23118 | 0.60363 | 0.23118 | 0.79814 |
| 0.27752 | 0.4226  | 0.23128 | 0.28043 | 0.23127 | 0.60418 | 0.23127 | 0.79859 |
| 0.27764 | 0.42278 | 0.23137 | 0.28052 | 0.23136 | 0.60473 | 0.23136 | 0.79932 |
| 0.27774 | 0.42296 | 0.23146 | 0.28088 | 0.23146 | 0.60473 | 0.23146 | 0.80023 |
| 0.27786 | 0.42323 | 0.23155 | 0.28115 | 0.23155 | 0.605   | 0.23155 | 0.80023 |
| 0.27796 | 0.42333 | 0.23165 | 0.28133 | 0.23164 | 0.60554 | 0.23164 | 0.80077 |
| 0.27808 | 0.42369 | 0.23175 | 0.28152 | 0.23173 | 0.606   | 0.23174 | 0.80123 |
| 0.27819 | 0.42406 | 0.23183 | 0.28188 | 0.23183 | 0.60672 | 0.23183 | 0.80177 |
| 0.2783  | 0.42406 | 0.23193 | 0.28225 | 0.23192 | 0.607   | 0.23192 | 0.80242 |
| 0.27841 | 0.42432 | 0.23202 | 0.28252 | 0.23201 | 0.60709 | 0.23201 | 0.80332 |
| 0.27852 | 0.42469 | 0.23211 | 0.2827  | 0.23211 | 0.60727 | 0.23211 | 0.80369 |
| 0.27863 | 0.4246  | 0.2322  | 0.28307 | 0.2322  | 0.60746 | 0.2322  | 0.80441 |
| 0.27875 | 0.4246  | 0.2323  | 0.28298 | 0.23229 | 0.60782 | 0.23229 | 0.80533 |
| 0.27885 | 0.42515 | 0.23239 | 0.28325 | 0.23238 | 0.60846 | 0.23238 | 0.80533 |
| 0.27897 | 0.42524 | 0.23248 | 0.28343 | 0.23247 | 0.60873 | 0.23247 | 0.80587 |
| 0.27908 | 0.4257  | 0.23258 | 0.28361 | 0.23257 | 0.60909 | 0.23257 | 0.80651 |
| 0.27919 | 0.42624 | 0.23267 | 0.28389 | 0.23266 | 0.60936 | 0.23266 | 0.80696 |
| 0.2793  | 0.4266  | 0.23276 | 0.28407 | 0.23275 | 0.61    | 0.23275 | 0.80733 |
| 0.27941 | 0.42706 | 0.23286 | 0.28416 | 0.23284 | 0.61055 | 0.23285 | 0.8076  |
| 0.27953 | 0.42733 | 0.23295 | 0.28443 | 0.23294 | 0.61082 | 0.23294 | 0.80815 |
| 0.27963 | 0.42742 | 0.23304 | 0.28498 | 0.23303 | 0.61119 | 0.23303 | 0.80861 |
| 0.27975 | 0.4276  | 0.23313 | 0.28525 | 0.23312 | 0.61155 | 0.23312 | 0.80915 |
| 0.27985 | 0.42806 | 0.23323 | 0.28525 | 0.23322 | 0.61191 | 0.23322 | 0.80988 |
| 0.27997 | 0.42806 | 0.23331 | 0.28552 | 0.23331 | 0.61228 | 0.23331 | 0.81042 |
| 0.28007 | 0.42824 | 0.23341 | 0.28552 | 0.2334  | 0.61255 | 0.2334  | 0.81097 |
| 0.28019 | 0.4287  | 0.2335  | 0.28561 | 0.23349 | 0.61291 | 0.2335  | 0.81179 |
| 0.2803  | 0.42888 | 0.23359 | 0.28598 | 0.23359 | 0.61328 | 0.23359 | 0.81188 |
| 0.28041 | 0.42915 | 0.23369 | 0.28635 | 0.23368 | 0.61355 | 0.23368 | 0.81234 |
| 0.28052 | 0.42933 | 0.23378 | 0.28661 | 0.23377 | 0.61383 | 0.23377 | 0.81306 |
| 0.28063 | 0.42969 | 0.23387 | 0.28661 | 0.23387 | 0.61437 | 0.23387 | 0.81379 |
| 0.28075 | 0.42997 | 0.23397 | 0.28689 | 0.23396 | 0.61501 | 0.23396 | 0.81406 |
| 0.28085 | 0.42997 | 0.23406 | 0.28716 | 0.23405 | 0.61528 | 0.23405 | 0.81388 |
| 0.28097 | 0.43033 | 0.23415 | 0.28725 | 0.23414 | 0.61564 | 0.23415 | 0.81434 |
| 0.28108 | 0.43079 | 0.23424 | 0.28743 | 0.23423 | 0.61601 | 0.23423 | 0.81515 |
| 0.28119 | 0.43097 | 0.23434 | 0.2878  | 0.23432 | 0.61638 | 0.23433 | 0.8158  |
| 0.2813  | 0.43125 | 0.23443 | 0.28798 | 0.23442 | 0.61673 | 0.23442 | 0.81616 |
| 0.28141 | 0.43179 | 0.23452 | 0.28817 | 0.23451 | 0.61701 | 0.23451 | 0.81634 |
| 0.28152 | 0.43224 | 0.23462 | 0.28871 | 0.2346  | 0.61729 | 0.23461 | 0.81688 |
| 0.28163 | 0.43224 | 0.2347  | 0.28899 | 0.2347  | 0.61755 | 0.2347  | 0.81761 |
| 0.28174 | 0.43224 | 0.2348  | 0.28934 | 0.23479 | 0.61856 | 0.23479 | 0.81807 |
| 0.28186 | 0.43261 | 0.23489 | 0.28943 | 0.23488 | 0.61901 | 0.23488 | 0.81862 |
| 0.28196 | 0.43279 | 0.23498 | 0.28962 | 0.23498 | 0.61883 | 0.23498 | 0.81907 |
| 0.28208 | 0.43316 | 0.23507 | 0.2898  | 0.23506 | 0.61919 | 0.23507 | 0.81944 |
| 0.28219 | 0.4338  | 0.23517 | 0.29017 | 0.23516 | 0.61947 | 0.23516 | 0.81953 |
| 0.2823  | 0.43398 | 0.23526 | 0.29026 | 0.23525 | 0.61947 | 0.23526 | 0.82016 |
| 0.28241 | 0.43398 | 0.23535 | 0.29044 | 0.23535 | 0.6201  | 0.23535 | 0.82052 |

|         |         |         |         |         |         |         |         |
|---------|---------|---------|---------|---------|---------|---------|---------|
| 0.28252 | 0.43434 | 0.23545 | 0.29053 | 0.23544 | 0.62038 | 0.23544 | 0.82107 |
| 0.28264 | 0.43434 | 0.23554 | 0.29071 | 0.23553 | 0.62056 | 0.23553 | 0.8218  |
| 0.28274 | 0.43488 | 0.23563 | 0.29108 | 0.23563 | 0.62111 | 0.23563 | 0.82235 |
| 0.28286 | 0.43525 | 0.23572 | 0.29135 | 0.23571 | 0.62156 | 0.23571 | 0.8228  |
| 0.28296 | 0.43543 | 0.23582 | 0.29163 | 0.23581 | 0.62165 | 0.23581 | 0.82353 |
| 0.28308 | 0.43571 | 0.23591 | 0.29153 | 0.2359  | 0.6222  | 0.2359  | 0.82407 |
| 0.28319 | 0.43579 | 0.236   | 0.29172 | 0.23599 | 0.62265 | 0.23599 | 0.82463 |
| 0.2833  | 0.43579 | 0.23609 | 0.29207 | 0.23609 | 0.6232  | 0.23609 | 0.82481 |
| 0.28341 | 0.43607 | 0.23618 | 0.29271 | 0.23618 | 0.62357 | 0.23618 | 0.82581 |
| 0.28352 | 0.43653 | 0.23628 | 0.29298 | 0.23627 | 0.62383 | 0.23627 | 0.82635 |
| 0.28363 | 0.43698 | 0.23637 | 0.29335 | 0.23636 | 0.62393 | 0.23637 | 0.82653 |
| 0.28374 | 0.43698 | 0.23646 | 0.29344 | 0.23646 | 0.62429 | 0.23646 | 0.82745 |
| 0.28385 | 0.43707 | 0.23656 | 0.29362 | 0.23655 | 0.62466 | 0.23655 | 0.82717 |
| 0.28397 | 0.43744 | 0.23665 | 0.29381 | 0.23664 | 0.62493 | 0.23664 | 0.8279  |
| 0.28408 | 0.4377  | 0.23674 | 0.29417 | 0.23674 | 0.62538 | 0.23674 | 0.82908 |
| 0.28419 | 0.43753 | 0.23683 | 0.29445 | 0.23683 | 0.62575 | 0.23683 | 0.8289  |
| 0.2843  | 0.43744 | 0.23693 | 0.29471 | 0.23692 | 0.6263  | 0.23692 | 0.82917 |
| 0.28441 | 0.43826 | 0.23702 | 0.29481 | 0.23701 | 0.62666 | 0.23702 | 0.82981 |
| 0.28453 | 0.43852 | 0.23711 | 0.29499 | 0.2371  | 0.62693 | 0.2371  | 0.83045 |
| 0.28463 | 0.4388  | 0.23721 | 0.29517 | 0.2372  | 0.6273  | 0.2372  | 0.83081 |
| 0.28475 | 0.43916 | 0.2373  | 0.29553 | 0.23729 | 0.62793 | 0.23729 | 0.83136 |
| 0.28485 | 0.43935 | 0.23739 | 0.29553 | 0.23738 | 0.62839 | 0.23738 | 0.83163 |
| 0.28497 | 0.43926 | 0.23748 | 0.2959  | 0.23747 | 0.6283  | 0.23747 | 0.83227 |
| 0.28507 | 0.43962 | 0.23757 | 0.29645 | 0.23757 | 0.62893 | 0.23757 | 0.83272 |
| 0.28519 | 0.44008 | 0.23767 | 0.29663 | 0.23766 | 0.6293  | 0.23766 | 0.8329  |
| 0.2853  | 0.44034 | 0.23776 | 0.29672 | 0.23775 | 0.62957 | 0.23775 | 0.834   |
| 0.28541 | 0.4408  | 0.23786 | 0.29717 | 0.23785 | 0.62985 | 0.23785 | 0.83454 |
| 0.28552 | 0.4408  | 0.23794 | 0.29726 | 0.23794 | 0.63021 | 0.23794 | 0.83482 |
| 0.28563 | 0.4408  | 0.23804 | 0.29745 | 0.23803 | 0.63048 | 0.23803 | 0.83518 |
| 0.28575 | 0.44135 | 0.23813 | 0.29781 | 0.23812 | 0.63102 | 0.23813 | 0.83582 |
| 0.28585 | 0.44171 | 0.23822 | 0.29827 | 0.23822 | 0.63139 | 0.23822 | 0.83645 |
| 0.28597 | 0.44181 | 0.23832 | 0.29854 | 0.2383  | 0.63166 | 0.23831 | 0.83764 |
| 0.28608 | 0.44171 | 0.23841 | 0.29863 | 0.2384  | 0.63221 | 0.2384  | 0.83819 |
| 0.28619 | 0.44217 | 0.2385  | 0.29872 | 0.2385  | 0.63258 | 0.23849 | 0.83882 |
| 0.2863  | 0.44253 | 0.23859 | 0.29909 | 0.23858 | 0.63285 | 0.23859 | 0.83901 |
| 0.28641 | 0.44281 | 0.23869 | 0.29909 | 0.23868 | 0.63339 | 0.23868 | 0.83992 |
| 0.28652 | 0.44289 | 0.23878 | 0.29963 | 0.23877 | 0.63367 | 0.23877 | 0.84    |
| 0.28664 | 0.44344 | 0.23887 | 0.29999 | 0.23887 | 0.63403 | 0.23886 | 0.84018 |
| 0.28674 | 0.44362 | 0.23897 | 0.29999 | 0.23896 | 0.6344  | 0.23896 | 0.84092 |
| 0.28686 | 0.4439  | 0.23905 | 0.30027 | 0.23905 | 0.63485 | 0.23905 | 0.84137 |
| 0.28696 | 0.4439  | 0.23915 | 0.30045 | 0.23914 | 0.63539 | 0.23914 | 0.84173 |
| 0.28708 | 0.44417 | 0.23924 | 0.3009  | 0.23923 | 0.63567 | 0.23923 | 0.84237 |
| 0.28719 | 0.44454 | 0.23934 | 0.30099 | 0.23933 | 0.6363  | 0.23933 | 0.84273 |
| 0.2873  | 0.44454 | 0.23943 | 0.30136 | 0.23942 | 0.6364  | 0.23942 | 0.8431  |
| 0.28741 | 0.44472 | 0.23952 | 0.30154 | 0.23951 | 0.63667 | 0.23951 | 0.84383 |
| 0.28752 | 0.44508 | 0.23962 | 0.30182 | 0.23961 | 0.6374  | 0.23961 | 0.8441  |
| 0.28764 | 0.44526 | 0.2397  | 0.30218 | 0.2397  | 0.63758 | 0.2397  | 0.84456 |
| 0.28774 | 0.44571 | 0.2398  | 0.30236 | 0.23979 | 0.63785 | 0.23979 | 0.84519 |
| 0.28786 | 0.44581 | 0.23989 | 0.30272 | 0.23988 | 0.63831 | 0.23989 | 0.84547 |
| 0.28796 | 0.44608 | 0.23998 | 0.30318 | 0.23997 | 0.63858 | 0.23997 | 0.8461  |
| 0.28808 | 0.44626 | 0.24008 | 0.30309 | 0.24006 | 0.63922 | 0.24007 | 0.84683 |
| 0.28819 | 0.44663 | 0.24017 | 0.30327 | 0.24016 | 0.6394  | 0.24016 | 0.84729 |
| 0.2883  | 0.44699 | 0.24026 | 0.30364 | 0.24025 | 0.63967 | 0.24025 | 0.84765 |
| 0.28841 | 0.44736 | 0.24035 | 0.30391 | 0.24034 | 0.6405  | 0.24035 | 0.84793 |



|         |         |         |         |         |         |         |         |
|---------|---------|---------|---------|---------|---------|---------|---------|
| 0.28852 | 0.44781 | 0.24045 | 0.304   | 0.24044 | 0.64104 | 0.24044 | 0.84847 |
| 0.28863 | 0.44781 | 0.24054 | 0.30446 | 0.24053 | 0.64113 | 0.24054 | 0.84883 |
| 0.28875 | 0.44809 | 0.24063 | 0.30464 | 0.24062 | 0.6414  | 0.24062 | 0.84938 |
| 0.28885 | 0.44881 | 0.24073 | 0.305   | 0.24072 | 0.64167 | 0.24072 | 0.84992 |
| 0.28897 | 0.44853 | 0.24081 | 0.305   | 0.24081 | 0.64204 | 0.24081 | 0.85066 |
| 0.28908 | 0.44899 | 0.24091 | 0.30527 | 0.2409  | 0.6424  | 0.2409  | 0.85138 |
| 0.28919 | 0.44899 | 0.241   | 0.30545 | 0.24099 | 0.64295 | 0.241   | 0.85148 |
| 0.2893  | 0.44926 | 0.2411  | 0.306   | 0.24109 | 0.64304 | 0.24109 | 0.85211 |
| 0.28941 | 0.44981 | 0.24119 | 0.30619 | 0.24118 | 0.64304 | 0.24118 | 0.85265 |
| 0.28953 | 0.45    | 0.24128 | 0.30655 | 0.24127 | 0.64368 | 0.24127 | 0.85284 |
| 0.28963 | 0.45018 | 0.24137 | 0.30673 | 0.24137 | 0.64432 | 0.24137 | 0.85393 |
| 0.28975 | 0.45054 | 0.24146 | 0.30691 | 0.24146 | 0.64477 | 0.24146 | 0.8543  |
| 0.28985 | 0.45082 | 0.24156 | 0.30727 | 0.24155 | 0.64531 | 0.24155 | 0.85448 |
| 0.28997 | 0.45099 | 0.24165 | 0.30755 | 0.24164 | 0.64541 | 0.24165 | 0.8553  |
| 0.29007 | 0.45136 | 0.24174 | 0.30792 | 0.24173 | 0.64577 | 0.24173 | 0.85585 |
| 0.29019 | 0.45145 | 0.24184 | 0.30809 | 0.24182 | 0.64596 | 0.24183 | 0.85629 |
| 0.2903  | 0.45173 | 0.24193 | 0.30818 | 0.24192 | 0.64641 | 0.24192 | 0.85657 |
| 0.29041 | 0.45173 | 0.24202 | 0.30818 | 0.24201 | 0.64686 | 0.24202 | 0.85711 |
| 0.29052 | 0.45236 | 0.24211 | 0.30855 | 0.2421  | 0.64704 | 0.2421  | 0.85748 |
| 0.29063 | 0.45255 | 0.24221 | 0.30891 | 0.2422  | 0.64759 | 0.2422  | 0.85803 |
| 0.29075 | 0.45263 | 0.2423  | 0.30928 | 0.24229 | 0.64814 | 0.24229 | 0.85848 |
| 0.29086 | 0.45309 | 0.24239 | 0.30919 | 0.24238 | 0.64832 | 0.24238 | 0.85857 |
| 0.29097 | 0.45318 | 0.24249 | 0.30974 | 0.24247 | 0.6486  | 0.24248 | 0.8593  |
| 0.29108 | 0.45336 | 0.24257 | 0.31019 | 0.24257 | 0.64895 | 0.24257 | 0.85967 |
| 0.29119 | 0.454   | 0.24267 | 0.31028 | 0.24266 | 0.64941 | 0.24266 | 0.85967 |
| 0.2913  | 0.45428 | 0.24276 | 0.31055 | 0.24275 | 0.64987 | 0.24275 | 0.8603  |
| 0.29141 | 0.45428 | 0.24285 | 0.31073 | 0.24285 | 0.65023 | 0.24285 | 0.86085 |
| 0.29152 | 0.45454 | 0.24295 | 0.31082 | 0.24294 | 0.6506  | 0.24294 | 0.8613  |
| 0.29164 | 0.45472 | 0.24304 | 0.31101 | 0.24303 | 0.65096 | 0.24303 | 0.86167 |
| 0.29174 | 0.45527 | 0.24313 | 0.31128 | 0.24312 | 0.65123 | 0.24313 | 0.86294 |
| 0.29186 | 0.45554 | 0.24322 | 0.31155 | 0.24322 | 0.65133 | 0.24322 | 0.86339 |
| 0.29196 | 0.45564 | 0.24332 | 0.31201 | 0.24331 | 0.65187 | 0.24331 | 0.86313 |
| 0.29208 | 0.45573 | 0.24341 | 0.31229 | 0.2434  | 0.65242 | 0.2434  | 0.86358 |
| 0.29219 | 0.45582 | 0.2435  | 0.31256 | 0.2435  | 0.65297 | 0.2435  | 0.86367 |
| 0.2923  | 0.45609 | 0.2436  | 0.31247 | 0.24358 | 0.65324 | 0.24359 | 0.86421 |
| 0.29241 | 0.45691 | 0.24369 | 0.31274 | 0.24368 | 0.65342 | 0.24368 | 0.86513 |
| 0.29252 | 0.45719 | 0.24378 | 0.31337 | 0.24377 | 0.65378 | 0.24377 | 0.86503 |
| 0.29264 | 0.45737 | 0.24387 | 0.31337 | 0.24386 | 0.65433 | 0.24386 | 0.86549 |
| 0.29274 | 0.45764 | 0.24397 | 0.31365 | 0.24396 | 0.65451 | 0.24396 | 0.86622 |
| 0.29286 | 0.45791 | 0.24405 | 0.3142  | 0.24405 | 0.65478 | 0.24405 | 0.86704 |
| 0.29296 | 0.45809 | 0.24415 | 0.3142  | 0.24414 | 0.65542 | 0.24414 | 0.86759 |
| 0.29308 | 0.45837 | 0.24424 | 0.31447 | 0.24423 | 0.65597 | 0.24424 | 0.86849 |
| 0.29319 | 0.45864 | 0.24433 | 0.31483 | 0.24433 | 0.65615 | 0.24433 | 0.86813 |
| 0.2933  | 0.45891 | 0.24443 | 0.31528 | 0.24442 | 0.65642 | 0.24442 | 0.86885 |
| 0.29341 | 0.45937 | 0.24452 | 0.31547 | 0.24451 | 0.6567  | 0.24451 | 0.86967 |
| 0.29352 | 0.45974 | 0.24461 | 0.31583 | 0.24461 | 0.65688 | 0.24461 | 0.86967 |
| 0.29363 | 0.46    | 0.24471 | 0.31601 | 0.2447  | 0.65742 | 0.2447  | 0.87004 |
| 0.29375 | 0.46    | 0.2448  | 0.31619 | 0.24479 | 0.65824 | 0.24479 | 0.87059 |
| 0.29385 | 0.46028 | 0.24489 | 0.31629 | 0.24488 | 0.6586  | 0.24489 | 0.87095 |
| 0.29397 | 0.46037 | 0.24498 | 0.31683 | 0.24497 | 0.6586  | 0.24497 | 0.87149 |
| 0.29408 | 0.46064 | 0.24508 | 0.31747 | 0.24507 | 0.6587  | 0.24507 | 0.87204 |
| 0.29419 | 0.46101 | 0.24516 | 0.31738 | 0.24516 | 0.65952 | 0.24516 | 0.87223 |
| 0.2943  | 0.46119 | 0.24526 | 0.31747 | 0.24525 | 0.65952 | 0.24525 | 0.87277 |
| 0.29441 | 0.46128 | 0.24536 | 0.31775 | 0.24534 | 0.66025 | 0.24535 | 0.87286 |

|         |         |         |         |         |         |         |         |
|---------|---------|---------|---------|---------|---------|---------|---------|
| 0.29453 | 0.46191 | 0.24544 | 0.31811 | 0.24544 | 0.66088 | 0.24544 | 0.87313 |
| 0.29463 | 0.46183 | 0.24554 | 0.31848 | 0.24553 | 0.66088 | 0.24553 | 0.87386 |
| 0.29475 | 0.46201 | 0.24563 | 0.31848 | 0.24562 | 0.66133 | 0.24562 | 0.8745  |
| 0.29485 | 0.46228 | 0.24572 | 0.31865 | 0.24572 | 0.66143 | 0.24572 | 0.87514 |
| 0.29497 | 0.46265 | 0.24581 | 0.31902 | 0.24581 | 0.66179 | 0.24581 | 0.87614 |
| 0.29508 | 0.4631  | 0.24591 | 0.31929 | 0.2459  | 0.66243 | 0.2459  | 0.87641 |
| 0.29519 | 0.46328 | 0.246   | 0.31966 | 0.24599 | 0.66288 | 0.246   | 0.87705 |
| 0.2953  | 0.46355 | 0.24609 | 0.32002 | 0.24609 | 0.66298 | 0.24609 | 0.87777 |
| 0.29541 | 0.46392 | 0.24619 | 0.32011 | 0.24617 | 0.66361 | 0.24618 | 0.87805 |
| 0.29552 | 0.4641  | 0.24628 | 0.32048 | 0.24627 | 0.6637  | 0.24627 | 0.87823 |
| 0.29563 | 0.46437 | 0.24637 | 0.32066 | 0.24636 | 0.66407 | 0.24636 | 0.87915 |
| 0.29575 | 0.46492 | 0.24647 | 0.32075 | 0.24645 | 0.6648  | 0.24646 | 0.88014 |
| 0.29586 | 0.46501 | 0.24656 | 0.32111 | 0.24655 | 0.66516 | 0.24655 | 0.88006 |
| 0.29597 | 0.46492 | 0.24665 | 0.32166 | 0.24664 | 0.66534 | 0.24664 | 0.88069 |
| 0.29608 | 0.46492 | 0.24674 | 0.32202 | 0.24673 | 0.66561 | 0.24673 | 0.88069 |
| 0.29619 | 0.46556 | 0.24684 | 0.32221 | 0.24683 | 0.66607 | 0.24683 | 0.88132 |
| 0.2963  | 0.46592 | 0.24692 | 0.32221 | 0.24692 | 0.66625 | 0.24692 | 0.88251 |
| 0.29641 | 0.46628 | 0.24702 | 0.32239 | 0.24701 | 0.66671 | 0.24701 | 0.88324 |
| 0.29652 | 0.46628 | 0.24712 | 0.32293 | 0.2471  | 0.66698 | 0.24711 | 0.88388 |
| 0.29664 | 0.46647 | 0.24721 | 0.32303 | 0.2472  | 0.66753 | 0.2472  | 0.88415 |
| 0.29674 | 0.46665 | 0.2473  | 0.32311 | 0.24729 | 0.66789 | 0.24729 | 0.88524 |
| 0.29686 | 0.46684 | 0.24739 | 0.32329 | 0.24738 | 0.66816 | 0.24738 | 0.88542 |
| 0.29696 | 0.46729 | 0.24748 | 0.32357 | 0.24748 | 0.66816 | 0.24748 | 0.88588 |
| 0.29708 | 0.46765 | 0.24757 | 0.32384 | 0.24756 | 0.6688  | 0.24757 | 0.88652 |
| 0.29719 | 0.46793 | 0.24767 | 0.32411 | 0.24766 | 0.66917 | 0.24766 | 0.88679 |
| 0.2973  | 0.46801 | 0.24776 | 0.32438 | 0.24775 | 0.66944 | 0.24776 | 0.88724 |
| 0.29741 | 0.46829 | 0.24785 | 0.32438 | 0.24784 | 0.66971 | 0.24784 | 0.88743 |
| 0.29752 | 0.46847 | 0.24795 | 0.32457 | 0.24793 | 0.67035 | 0.24794 | 0.88779 |
| 0.29764 | 0.46857 | 0.24804 | 0.32502 | 0.24803 | 0.67071 | 0.24803 | 0.88888 |
| 0.29774 | 0.46875 | 0.24813 | 0.3252  | 0.24813 | 0.67125 | 0.24813 | 0.88888 |
| 0.29786 | 0.46902 | 0.24823 | 0.32548 | 0.24821 | 0.67153 | 0.24822 | 0.88961 |
| 0.29796 | 0.4692  | 0.24832 | 0.32585 | 0.24831 | 0.67181 | 0.24831 | 0.88997 |
| 0.29808 | 0.46947 | 0.24841 | 0.32585 | 0.2484  | 0.67235 | 0.2484  | 0.89043 |
| 0.29819 | 0.47002 | 0.2485  | 0.32612 | 0.24849 | 0.67272 | 0.24849 | 0.8907  |
| 0.2983  | 0.47002 | 0.24859 | 0.32648 | 0.24859 | 0.67326 | 0.24859 | 0.89125 |
| 0.29841 | 0.47029 | 0.24869 | 0.32666 | 0.24868 | 0.67344 | 0.24868 | 0.89171 |
| 0.29852 | 0.47074 | 0.24878 | 0.32693 | 0.24877 | 0.6739  | 0.24877 | 0.89197 |
| 0.29863 | 0.47111 | 0.24888 | 0.32721 | 0.24886 | 0.67417 | 0.24887 | 0.8928  |
| 0.29875 | 0.47111 | 0.24896 | 0.32767 | 0.24896 | 0.67472 | 0.24896 | 0.89289 |
| 0.29885 | 0.47156 | 0.24906 | 0.32794 | 0.24904 | 0.67499 | 0.24905 | 0.89307 |
| 0.29897 | 0.47166 | 0.24915 | 0.32821 | 0.24914 | 0.67508 | 0.24914 | 0.89371 |
| 0.29908 | 0.47202 | 0.24924 | 0.32849 | 0.24924 | 0.67526 | 0.24924 | 0.89379 |
| 0.29919 | 0.47256 | 0.24933 | 0.32876 | 0.24932 | 0.67554 | 0.24932 | 0.89425 |
| 0.2993  | 0.47266 | 0.24943 | 0.32922 | 0.24942 | 0.67599 | 0.24942 | 0.8947  |
| 0.29941 | 0.47284 | 0.24952 | 0.3293  | 0.24951 | 0.67663 | 0.24952 | 0.89526 |
| 0.29953 | 0.47329 | 0.24961 | 0.32958 | 0.24961 | 0.6769  | 0.24961 | 0.8958  |
| 0.29963 | 0.47366 | 0.24971 | 0.32976 | 0.24969 | 0.67717 | 0.2497  | 0.89635 |
| 0.29975 | 0.47375 | 0.2498  | 0.32994 | 0.24979 | 0.67809 | 0.24979 | 0.8968  |
| 0.29985 | 0.47403 | 0.24989 | 0.33013 | 0.24989 | 0.67835 | 0.24989 | 0.89698 |
| 0.29997 | 0.47411 | 0.24999 | 0.33048 | 0.24997 | 0.67872 | 0.24998 | 0.89771 |
| 0.30007 | 0.47429 | 0.25008 | 0.33094 | 0.25007 | 0.67926 | 0.25007 | 0.89816 |
| 0.30019 | 0.47448 | 0.25017 | 0.3313  | 0.25016 | 0.67954 | 0.25016 | 0.89862 |
| 0.3003  | 0.47466 | 0.25026 | 0.3314  | 0.25025 | 0.67936 | 0.25025 | 0.89889 |
| 0.30041 | 0.47512 | 0.25036 | 0.33176 | 0.25035 | 0.67954 | 0.25035 | 0.89944 |

|         |         |         |         |         |         |         |         |
|---------|---------|---------|---------|---------|---------|---------|---------|
| 0.30052 | 0.47566 | 0.25044 | 0.33185 | 0.25044 | 0.67981 | 0.25044 | 0.89962 |
| 0.30063 | 0.47548 | 0.25054 | 0.33203 | 0.25053 | 0.68027 | 0.25053 | 0.90044 |
| 0.30075 | 0.47612 | 0.25063 | 0.3323  | 0.25062 | 0.68072 | 0.25063 | 0.90089 |
| 0.30085 | 0.4763  | 0.25072 | 0.33258 | 0.25072 | 0.68082 | 0.25072 | 0.90126 |
| 0.30097 | 0.47657 | 0.25082 | 0.33276 | 0.2508  | 0.68127 | 0.25081 | 0.90226 |
| 0.30108 | 0.47712 | 0.25091 | 0.33285 | 0.2509  | 0.68218 | 0.2509  | 0.90263 |
| 0.30119 | 0.4773  | 0.251   | 0.33303 | 0.251   | 0.68227 | 0.251   | 0.90263 |
| 0.3013  | 0.47739 | 0.25109 | 0.33331 | 0.25109 | 0.68255 | 0.25109 | 0.90336 |
| 0.30141 | 0.47767 | 0.25119 | 0.33377 | 0.25118 | 0.68291 | 0.25118 | 0.90399 |
| 0.30152 | 0.47785 | 0.25128 | 0.33422 | 0.25127 | 0.68336 | 0.25128 | 0.90399 |
| 0.30163 | 0.4783  | 0.25137 | 0.3344  | 0.25137 | 0.684   | 0.25136 | 0.9049  |
| 0.30174 | 0.47875 | 0.25147 | 0.33458 | 0.25145 | 0.68436 | 0.25146 | 0.90526 |
| 0.30186 | 0.47903 | 0.25155 | 0.33485 | 0.25155 | 0.68427 | 0.25155 | 0.9059  |
| 0.30196 | 0.47912 | 0.25165 | 0.33504 | 0.25164 | 0.685   | 0.25164 | 0.90618 |
| 0.30208 | 0.4793  | 0.25175 | 0.33522 | 0.25173 | 0.68546 | 0.25174 | 0.90672 |
| 0.30219 | 0.47949 | 0.25184 | 0.33568 | 0.25183 | 0.686   | 0.25183 | 0.90736 |
| 0.3023  | 0.47975 | 0.25193 | 0.33586 | 0.25192 | 0.68609 | 0.25192 | 0.90799 |
| 0.30241 | 0.48021 | 0.25202 | 0.33641 | 0.25201 | 0.68628 | 0.25201 | 0.90836 |
| 0.30252 | 0.48048 | 0.25211 | 0.3365  | 0.25211 | 0.68664 | 0.25211 | 0.90845 |
| 0.30264 | 0.48066 | 0.2522  | 0.33668 | 0.2522  | 0.68727 | 0.2522  | 0.90936 |
| 0.30274 | 0.48076 | 0.2523  | 0.33686 | 0.25229 | 0.68773 | 0.25229 | 0.90981 |
| 0.30286 | 0.48122 | 0.25239 | 0.33732 | 0.25238 | 0.68773 | 0.25239 | 0.91036 |
| 0.30296 | 0.48148 | 0.25248 | 0.3374  | 0.25247 | 0.68819 | 0.25247 | 0.91118 |
| 0.30308 | 0.48176 | 0.25258 | 0.33768 | 0.25256 | 0.68883 | 0.25257 | 0.91164 |
| 0.30319 | 0.4824  | 0.25267 | 0.33804 | 0.25266 | 0.68901 | 0.25266 | 0.91209 |
| 0.3033  | 0.48249 | 0.25276 | 0.33849 | 0.25276 | 0.68937 | 0.25276 | 0.91263 |
| 0.30341 | 0.48258 | 0.25285 | 0.33867 | 0.25284 | 0.69001 | 0.25284 | 0.91273 |
| 0.30352 | 0.48294 | 0.25295 | 0.33904 | 0.25294 | 0.69001 | 0.25294 | 0.91336 |
| 0.30363 | 0.48313 | 0.25304 | 0.33931 | 0.25303 | 0.69019 | 0.25304 | 0.91382 |
| 0.30374 | 0.4834  | 0.25313 | 0.33959 | 0.25312 | 0.69037 | 0.25312 | 0.91391 |
| 0.30385 | 0.48395 | 0.25323 | 0.33977 | 0.25322 | 0.69074 | 0.25322 | 0.91454 |
| 0.30397 | 0.48431 | 0.25332 | 0.34004 | 0.25331 | 0.69156 | 0.25331 | 0.91519 |
| 0.30408 | 0.48449 | 0.25341 | 0.3405  | 0.2534  | 0.69182 | 0.2534  | 0.91564 |
| 0.30419 | 0.48513 | 0.2535  | 0.3405  | 0.25349 | 0.69192 | 0.2535  | 0.91619 |
| 0.3043  | 0.4854  | 0.25359 | 0.34059 | 0.25359 | 0.69238 | 0.25359 | 0.91674 |
| 0.30441 | 0.48549 | 0.25369 | 0.34077 | 0.25368 | 0.69292 | 0.25368 | 0.91718 |
| 0.30453 | 0.48568 | 0.25378 | 0.34141 | 0.25377 | 0.69337 | 0.25377 | 0.91782 |
| 0.30463 | 0.48577 | 0.25387 | 0.34168 | 0.25387 | 0.69383 | 0.25387 | 0.91828 |
| 0.30475 | 0.48594 | 0.25396 | 0.34187 | 0.25396 | 0.69437 | 0.25396 | 0.91865 |
| 0.30485 | 0.48631 | 0.25406 | 0.34196 | 0.25405 | 0.69437 | 0.25405 | 0.91891 |
| 0.30497 | 0.48686 | 0.25415 | 0.34232 | 0.25414 | 0.69456 | 0.25415 | 0.91964 |
| 0.30507 | 0.48713 | 0.25424 | 0.34277 | 0.25423 | 0.69528 | 0.25423 | 0.92001 |
| 0.30519 | 0.48722 | 0.25434 | 0.34295 | 0.25432 | 0.69574 | 0.25433 | 0.92046 |
| 0.3053  | 0.4875  | 0.25443 | 0.34314 | 0.25442 | 0.69602 | 0.25442 | 0.92101 |
| 0.30541 | 0.48786 | 0.25452 | 0.34341 | 0.25451 | 0.69629 | 0.25451 | 0.92147 |
| 0.30552 | 0.48822 | 0.25461 | 0.34341 | 0.2546  | 0.69638 | 0.25461 | 0.92165 |
| 0.30563 | 0.4884  | 0.25471 | 0.34369 | 0.2547  | 0.69665 | 0.2547  | 0.92237 |
| 0.30575 | 0.48868 | 0.25479 | 0.34405 | 0.25479 | 0.69674 | 0.25479 | 0.92274 |
| 0.30586 | 0.48913 | 0.25489 | 0.34423 | 0.25488 | 0.69756 | 0.25488 | 0.9231  |
| 0.30597 | 0.48931 | 0.25499 | 0.3445  | 0.25497 | 0.69747 | 0.25498 | 0.92374 |
| 0.30608 | 0.48949 | 0.25507 | 0.34487 | 0.25507 | 0.69811 | 0.25507 | 0.92447 |
| 0.30619 | 0.48967 | 0.25517 | 0.34505 | 0.25516 | 0.69829 | 0.25516 | 0.92484 |
| 0.3063  | 0.49013 | 0.25526 | 0.34514 | 0.25525 | 0.69884 | 0.25526 | 0.92575 |
| 0.30641 | 0.49041 | 0.25535 | 0.34569 | 0.25535 | 0.69929 | 0.25535 | 0.92602 |

|         |         |         |         |         |         |         |         |
|---------|---------|---------|---------|---------|---------|---------|---------|
| 0.30652 | 0.49068 | 0.25545 | 0.34615 | 0.25544 | 0.69956 | 0.25544 | 0.92611 |
| 0.30664 | 0.49095 | 0.25554 | 0.34633 | 0.25553 | 0.70029 | 0.25553 | 0.92657 |
| 0.30674 | 0.49086 | 0.25563 | 0.34669 | 0.25562 | 0.70083 | 0.25563 | 0.92738 |
| 0.30686 | 0.49105 | 0.25572 | 0.34696 | 0.25571 | 0.70075 | 0.25571 | 0.9272  |
| 0.30696 | 0.4914  | 0.25582 | 0.34723 | 0.25581 | 0.70093 | 0.25581 | 0.92738 |
| 0.30708 | 0.49159 | 0.25591 | 0.34732 | 0.2559  | 0.70093 | 0.2559  | 0.92802 |
| 0.30719 | 0.49196 | 0.256   | 0.34796 | 0.256   | 0.70148 | 0.256   | 0.92856 |
| 0.3073  | 0.49222 | 0.2561  | 0.34805 | 0.25608 | 0.70193 | 0.25609 | 0.92948 |
| 0.30741 | 0.49278 | 0.25618 | 0.34805 | 0.25618 | 0.70193 | 0.25618 | 0.92966 |
| 0.30752 | 0.49296 | 0.25628 | 0.34841 | 0.25627 | 0.70239 | 0.25627 | 0.93011 |
| 0.30764 | 0.49314 | 0.25637 | 0.3486  | 0.25636 | 0.70284 | 0.25636 | 0.93075 |
| 0.30774 | 0.49332 | 0.25646 | 0.34905 | 0.25646 | 0.70338 | 0.25646 | 0.93102 |
| 0.30786 | 0.49378 | 0.25656 | 0.34933 | 0.25655 | 0.70375 | 0.25655 | 0.93148 |
| 0.30796 | 0.49414 | 0.25665 | 0.34951 | 0.25664 | 0.70429 | 0.25664 | 0.93221 |
| 0.30808 | 0.49404 | 0.25675 | 0.34978 | 0.25673 | 0.70494 | 0.25674 | 0.93275 |
| 0.30819 | 0.49441 | 0.25683 | 0.34997 | 0.25683 | 0.70494 | 0.25683 | 0.9333  |
| 0.3083  | 0.49468 | 0.25693 | 0.35033 | 0.25692 | 0.7053  | 0.25692 | 0.93384 |
| 0.30841 | 0.49495 | 0.25702 | 0.35051 | 0.25701 | 0.70594 | 0.25701 | 0.9343  |
| 0.30852 | 0.49523 | 0.25711 | 0.3507  | 0.25711 | 0.70621 | 0.25711 | 0.93476 |
| 0.30863 | 0.49577 | 0.25721 | 0.35114 | 0.25719 | 0.70639 | 0.2572  | 0.93493 |
| 0.30875 | 0.49605 | 0.2573  | 0.35151 | 0.25729 | 0.70712 | 0.25729 | 0.93512 |
| 0.30885 | 0.49614 | 0.25739 | 0.35197 | 0.25738 | 0.70748 | 0.25738 | 0.93521 |
| 0.30897 | 0.49605 | 0.25748 | 0.35206 | 0.25747 | 0.70739 | 0.25747 | 0.93603 |
| 0.30908 | 0.49641 | 0.25758 | 0.35215 | 0.25757 | 0.70784 | 0.25757 | 0.93667 |
| 0.30919 | 0.49678 | 0.25767 | 0.35233 | 0.25766 | 0.7083  | 0.25766 | 0.93694 |
| 0.3093  | 0.49696 | 0.25776 | 0.35233 | 0.25775 | 0.70875 | 0.25775 | 0.9373  |
| 0.30941 | 0.49696 | 0.25786 | 0.35261 | 0.25784 | 0.70903 | 0.25785 | 0.9374  |
| 0.30953 | 0.4975  | 0.25795 | 0.35306 | 0.25794 | 0.70921 | 0.25794 | 0.93767 |
| 0.30963 | 0.49787 | 0.25804 | 0.35296 | 0.25803 | 0.70976 | 0.25803 | 0.9383  |
| 0.30975 | 0.49824 | 0.25813 | 0.35351 | 0.25812 | 0.71003 | 0.25812 | 0.93849 |
| 0.30985 | 0.4986  | 0.25822 | 0.35397 | 0.25822 | 0.71048 | 0.25822 | 0.93903 |
| 0.30997 | 0.49878 | 0.25832 | 0.35397 | 0.25831 | 0.71085 | 0.25831 | 0.93985 |
| 0.31007 | 0.49923 | 0.25841 | 0.35424 | 0.2584  | 0.7113  | 0.2584  | 0.94003 |
| 0.31019 | 0.4996  | 0.25851 | 0.3546  | 0.25849 | 0.71176 | 0.2585  | 0.94076 |
| 0.3103  | 0.49951 | 0.25859 | 0.35469 | 0.25859 | 0.71231 | 0.25859 | 0.94095 |
| 0.31041 | 0.49978 | 0.25869 | 0.35506 | 0.25868 | 0.71231 | 0.25868 | 0.94158 |
| 0.31052 | 0.50033 | 0.25878 | 0.35543 | 0.25877 | 0.71258 | 0.25877 | 0.94204 |
| 0.31063 | 0.50087 | 0.25887 | 0.3557  | 0.25886 | 0.71294 | 0.25886 | 0.9424  |
| 0.31075 | 0.50106 | 0.25896 | 0.35579 | 0.25896 | 0.71304 | 0.25896 | 0.94303 |
| 0.31086 | 0.50124 | 0.25906 | 0.35588 | 0.25905 | 0.71367 | 0.25905 | 0.94322 |
| 0.31097 | 0.50151 | 0.25915 | 0.35633 | 0.25914 | 0.71385 | 0.25914 | 0.94394 |
| 0.31108 | 0.5016  | 0.25924 | 0.35688 | 0.25923 | 0.71431 | 0.25923 | 0.94477 |
| 0.31119 | 0.50196 | 0.25934 | 0.35706 | 0.25933 | 0.71486 | 0.25933 | 0.94486 |
| 0.3113  | 0.50214 | 0.25943 | 0.35724 | 0.25942 | 0.71495 | 0.25942 | 0.9455  |
| 0.31141 | 0.50242 | 0.25952 | 0.35761 | 0.25951 | 0.71558 | 0.25951 | 0.94595 |
| 0.31152 | 0.5026  | 0.25962 | 0.35788 | 0.2596  | 0.71586 | 0.25961 | 0.94631 |
| 0.31164 | 0.50278 | 0.25971 | 0.35798 | 0.2597  | 0.71613 | 0.2597  | 0.94695 |
| 0.31174 | 0.50324 | 0.2598  | 0.35843 | 0.25979 | 0.71631 | 0.25979 | 0.94768 |
| 0.31186 | 0.50406 | 0.25989 | 0.35861 | 0.25988 | 0.71685 | 0.25988 | 0.94777 |
| 0.31196 | 0.50397 | 0.25998 | 0.3587  | 0.25998 | 0.7175  | 0.25998 | 0.94832 |
| 0.31208 | 0.50415 | 0.26008 | 0.35879 | 0.26006 | 0.71776 | 0.26007 | 0.94841 |
| 0.31219 | 0.50442 | 0.26017 | 0.35934 | 0.26016 | 0.71795 | 0.26016 | 0.94905 |
| 0.3123  | 0.5046  | 0.26026 | 0.35952 | 0.26025 | 0.71832 | 0.26026 | 0.94986 |
| 0.31241 | 0.50488 | 0.26035 | 0.3598  | 0.26035 | 0.71867 | 0.26035 | 0.95023 |

|         |         |         |         |         |         |         |         |
|---------|---------|---------|---------|---------|---------|---------|---------|
| 0.31252 | 0.50497 | 0.26045 | 0.35998 | 0.26044 | 0.71913 | 0.26044 | 0.95095 |
| 0.31264 | 0.50525 | 0.26054 | 0.36043 | 0.26053 | 0.71949 | 0.26053 | 0.95123 |
| 0.31274 | 0.5056  | 0.26063 | 0.36089 | 0.26063 | 0.71959 | 0.26063 | 0.95132 |
| 0.31286 | 0.50597 | 0.26073 | 0.36107 | 0.26071 | 0.72013 | 0.26072 | 0.95178 |
| 0.31297 | 0.50597 | 0.26082 | 0.36116 | 0.26081 | 0.72059 | 0.26081 | 0.95277 |
| 0.31308 | 0.50643 | 0.26091 | 0.36152 | 0.2609  | 0.72096 | 0.2609  | 0.95314 |
| 0.31319 | 0.5067  | 0.261   | 0.36171 | 0.26099 | 0.72105 | 0.26099 | 0.95368 |
| 0.3133  | 0.50688 | 0.2611  | 0.36225 | 0.26109 | 0.72168 | 0.26109 | 0.95432 |
| 0.31341 | 0.50706 | 0.26118 | 0.36235 | 0.26118 | 0.72196 | 0.26118 | 0.95496 |
| 0.31352 | 0.5077  | 0.26128 | 0.3627  | 0.26127 | 0.72232 | 0.26127 | 0.95496 |
| 0.31363 | 0.50779 | 0.26137 | 0.36307 | 0.26136 | 0.72286 | 0.26137 | 0.95533 |
| 0.31375 | 0.50779 | 0.26146 | 0.36353 | 0.26146 | 0.72295 | 0.26146 | 0.95569 |
| 0.31385 | 0.50824 | 0.26156 | 0.36371 | 0.26155 | 0.72341 | 0.26155 | 0.95587 |
| 0.31397 | 0.50879 | 0.26165 | 0.36398 | 0.26164 | 0.72369 | 0.26164 | 0.95669 |
| 0.31408 | 0.50888 | 0.26174 | 0.36389 | 0.26174 | 0.72405 | 0.26174 | 0.95723 |
| 0.31419 | 0.50916 | 0.26183 | 0.36416 | 0.26182 | 0.7245  | 0.26183 | 0.95779 |
| 0.3143  | 0.50943 | 0.26193 | 0.36434 | 0.26192 | 0.72487 | 0.26192 | 0.9586  |
| 0.31441 | 0.50961 | 0.26202 | 0.36461 | 0.26201 | 0.72532 | 0.26202 | 0.95888 |
| 0.31453 | 0.50997 | 0.26211 | 0.36516 | 0.26211 | 0.72559 | 0.26211 | 0.95924 |
| 0.31463 | 0.51016 | 0.26221 | 0.36535 | 0.2622  | 0.72596 | 0.2622  | 0.9596  |
| 0.31475 | 0.51052 | 0.2623  | 0.36571 | 0.26229 | 0.72659 | 0.26229 | 0.95987 |
| 0.31485 | 0.51052 | 0.26239 | 0.3659  | 0.26238 | 0.72687 | 0.26238 | 0.96024 |
| 0.31497 | 0.51052 | 0.26248 | 0.36599 | 0.26247 | 0.72714 | 0.26248 | 0.96124 |
| 0.31507 | 0.51107 | 0.26258 | 0.36671 | 0.26257 | 0.72732 | 0.26257 | 0.96188 |
| 0.31519 | 0.51152 | 0.26267 | 0.36716 | 0.26266 | 0.72724 | 0.26266 | 0.96251 |
| 0.3153  | 0.51189 | 0.26276 | 0.36707 | 0.26275 | 0.72778 | 0.26275 | 0.96297 |
| 0.31541 | 0.51216 | 0.26285 | 0.36753 | 0.26285 | 0.72824 | 0.26285 | 0.96315 |
| 0.31552 | 0.51253 | 0.26294 | 0.36781 | 0.26294 | 0.72896 | 0.26294 | 0.96361 |
| 0.31563 | 0.5127  | 0.26304 | 0.36781 | 0.26303 | 0.72941 | 0.26303 | 0.96479 |
| 0.31575 | 0.51298 | 0.26313 | 0.36817 | 0.26312 | 0.72969 | 0.26313 | 0.96488 |
| 0.31585 | 0.51335 | 0.26322 | 0.36844 | 0.26322 | 0.73005 | 0.26322 | 0.96497 |
| 0.31597 | 0.51353 | 0.26332 | 0.36881 | 0.26331 | 0.73032 | 0.26331 | 0.9657  |
| 0.31608 | 0.5138  | 0.26341 | 0.36872 | 0.2634  | 0.73051 | 0.2634  | 0.96615 |
| 0.31619 | 0.51407 | 0.2635  | 0.36917 | 0.2635  | 0.7307  | 0.26349 | 0.9667  |
| 0.3163  | 0.51434 | 0.26359 | 0.36963 | 0.26359 | 0.73106 | 0.26359 | 0.96724 |
| 0.31641 | 0.51452 | 0.26369 | 0.36972 | 0.26368 | 0.73115 | 0.26368 | 0.96806 |
| 0.31652 | 0.51489 | 0.26378 | 0.36999 | 0.26377 | 0.73169 | 0.26377 | 0.96843 |
| 0.31664 | 0.51516 | 0.26387 | 0.37026 | 0.26386 | 0.73224 | 0.26386 | 0.96925 |
| 0.31674 | 0.51543 | 0.26397 | 0.37036 | 0.26396 | 0.73269 | 0.26396 | 0.9697  |
| 0.31686 | 0.51552 | 0.26405 | 0.37071 | 0.26405 | 0.73278 | 0.26405 | 0.97007 |
| 0.31696 | 0.51571 | 0.26415 | 0.37108 | 0.26414 | 0.73306 | 0.26414 | 0.97034 |
| 0.31708 | 0.51607 | 0.26425 | 0.37117 | 0.26423 | 0.73324 | 0.26424 | 0.97043 |
| 0.31719 | 0.51635 | 0.26434 | 0.37163 | 0.26433 | 0.73352 | 0.26433 | 0.97116 |
| 0.3173  | 0.51625 | 0.26443 | 0.37199 | 0.26442 | 0.73406 | 0.26442 | 0.97171 |
| 0.31741 | 0.5168  | 0.26452 | 0.37244 | 0.26451 | 0.73452 | 0.26451 | 0.97217 |
| 0.31752 | 0.51717 | 0.26461 | 0.37253 | 0.26461 | 0.73469 | 0.26461 | 0.97226 |
| 0.31764 | 0.51708 | 0.2647  | 0.37235 | 0.2647  | 0.73515 | 0.2647  | 0.97289 |
| 0.31774 | 0.51735 | 0.2648  | 0.37281 | 0.26479 | 0.73561 | 0.26479 | 0.97307 |
| 0.31786 | 0.51789 | 0.26489 | 0.37326 | 0.26488 | 0.73597 | 0.26489 | 0.97335 |
| 0.31796 | 0.51807 | 0.26498 | 0.37363 | 0.26497 | 0.73652 | 0.26497 | 0.97417 |
| 0.31808 | 0.51844 | 0.26508 | 0.37409 | 0.26506 | 0.73652 | 0.26507 | 0.9749  |
| 0.31819 | 0.5188  | 0.26517 | 0.37409 | 0.26516 | 0.7367  | 0.26516 | 0.97544 |
| 0.3183  | 0.51862 | 0.26526 | 0.37445 | 0.26526 | 0.73734 | 0.26526 | 0.97617 |
| 0.31841 | 0.51908 | 0.26535 | 0.37481 | 0.26534 | 0.73761 | 0.26535 | 0.97662 |

|         |         |         |         |         |         |         |         |
|---------|---------|---------|---------|---------|---------|---------|---------|
| 0.31852 | 0.51953 | 0.26545 | 0.37545 | 0.26544 | 0.73761 | 0.26544 | 0.97671 |
| 0.31863 | 0.51962 | 0.26554 | 0.37591 | 0.26553 | 0.73807 | 0.26553 | 0.97753 |
| 0.31875 | 0.5199  | 0.26563 | 0.37636 | 0.26562 | 0.73843 | 0.26562 | 0.9778  |
| 0.31885 | 0.52017 | 0.26573 | 0.37654 | 0.26572 | 0.73861 | 0.26572 | 0.97826 |
| 0.31897 | 0.52044 | 0.26581 | 0.37718 | 0.26581 | 0.73934 | 0.26581 | 0.97881 |
| 0.31908 | 0.52099 | 0.26591 | 0.37736 | 0.2659  | 0.73952 | 0.2659  | 0.97899 |
| 0.31919 | 0.52135 | 0.266   | 0.37727 | 0.26599 | 0.73971 | 0.26599 | 0.97963 |
| 0.3193  | 0.52135 | 0.2661  | 0.37745 | 0.26609 | 0.74015 | 0.26609 | 0.9799  |
| 0.31941 | 0.52162 | 0.26619 | 0.37781 | 0.26618 | 0.74061 | 0.26618 | 0.98008 |
| 0.31953 | 0.52199 | 0.26628 | 0.37799 | 0.26627 | 0.74071 | 0.26627 | 0.98081 |
| 0.31963 | 0.52226 | 0.26637 | 0.37836 | 0.26637 | 0.74134 | 0.26637 | 0.98145 |
| 0.31975 | 0.52281 | 0.26646 | 0.37909 | 0.26645 | 0.7418  | 0.26645 | 0.98181 |
| 0.31985 | 0.52299 | 0.26656 | 0.37927 | 0.26655 | 0.74198 | 0.26655 | 0.98236 |
| 0.31997 | 0.52299 | 0.26665 | 0.37936 | 0.26664 | 0.74243 | 0.26665 | 0.98281 |
| 0.32007 | 0.52318 | 0.26674 | 0.37964 | 0.26673 | 0.74289 | 0.26673 | 0.98363 |
| 0.32019 | 0.52381 | 0.26684 | 0.38    | 0.26682 | 0.74279 | 0.26683 | 0.98354 |
| 0.3203  | 0.52399 | 0.26693 | 0.38009 | 0.26692 | 0.74344 | 0.26692 | 0.98336 |
| 0.32041 | 0.52426 | 0.26702 | 0.38045 | 0.26702 | 0.74426 | 0.26702 | 0.98418 |
| 0.32052 | 0.52454 | 0.26711 | 0.38073 | 0.2671  | 0.74435 | 0.2671  | 0.98481 |
| 0.32063 | 0.52481 | 0.26721 | 0.381   | 0.2672  | 0.74462 | 0.2672  | 0.98545 |
| 0.32075 | 0.52508 | 0.2673  | 0.38137 | 0.26729 | 0.74498 | 0.2673  | 0.98545 |
| 0.32086 | 0.52526 | 0.26739 | 0.38173 | 0.26738 | 0.74526 | 0.26738 | 0.98609 |
| 0.32097 | 0.52563 | 0.26748 | 0.38201 | 0.26748 | 0.74562 | 0.26748 | 0.98655 |
| 0.32108 | 0.52572 | 0.26757 | 0.38255 | 0.26757 | 0.74598 | 0.26757 | 0.98691 |
| 0.32119 | 0.52591 | 0.26767 | 0.38273 | 0.26766 | 0.74671 | 0.26766 | 0.98746 |
| 0.3213  | 0.52636 | 0.26776 | 0.38255 | 0.26775 | 0.7468  | 0.26776 | 0.988   |
| 0.32141 | 0.52663 | 0.26785 | 0.38264 | 0.26785 | 0.74717 | 0.26785 | 0.98828 |
| 0.32152 | 0.52691 | 0.26795 | 0.38309 | 0.26794 | 0.74753 | 0.26794 | 0.98937 |
| 0.32164 | 0.527   | 0.26804 | 0.38355 | 0.26803 | 0.74798 | 0.26803 | 0.98991 |
| 0.32174 | 0.52736 | 0.26813 | 0.38383 | 0.26812 | 0.7479  | 0.26813 | 0.9901  |
| 0.32186 | 0.52781 | 0.26822 | 0.38383 | 0.26822 | 0.74817 | 0.26822 | 0.99055 |
| 0.32196 | 0.52808 | 0.26832 | 0.38392 | 0.26831 | 0.74826 | 0.26831 | 0.99109 |
| 0.32208 | 0.52836 | 0.26841 | 0.38446 | 0.2684  | 0.74862 | 0.2684  | 0.99073 |
| 0.32219 | 0.52855 | 0.2685  | 0.38491 | 0.26849 | 0.74935 | 0.26849 | 0.99146 |
| 0.3223  | 0.52872 | 0.2686  | 0.385   | 0.26858 | 0.74999 | 0.26859 | 0.9921  |
| 0.32241 | 0.529   | 0.26869 | 0.38537 | 0.26868 | 0.75026 | 0.26868 | 0.9921  |
| 0.32252 | 0.52927 | 0.26878 | 0.38582 | 0.26878 | 0.75063 | 0.26877 | 0.99264 |
| 0.32264 | 0.52973 | 0.26887 | 0.38619 | 0.26886 | 0.75071 | 0.26886 | 0.99328 |
| 0.32274 | 0.52982 | 0.26897 | 0.38646 | 0.26896 | 0.75081 | 0.26896 | 0.99365 |
| 0.32286 | 0.53027 | 0.26905 | 0.38637 | 0.26905 | 0.75126 | 0.26905 | 0.99392 |
| 0.32297 | 0.53045 | 0.26915 | 0.38655 | 0.26914 | 0.7519  | 0.26914 | 0.99474 |
| 0.32308 | 0.53054 | 0.26924 | 0.38719 | 0.26923 | 0.75208 | 0.26924 | 0.99491 |
| 0.32319 | 0.53109 | 0.26933 | 0.38756 | 0.26933 | 0.75227 | 0.26933 | 0.99546 |
| 0.3233  | 0.53118 | 0.26943 | 0.38756 | 0.26942 | 0.75272 | 0.26942 | 0.99664 |
| 0.32341 | 0.53145 | 0.26952 | 0.38783 | 0.26951 | 0.75299 | 0.26951 | 0.99701 |
| 0.32352 | 0.53191 | 0.26961 | 0.3881  | 0.26961 | 0.75308 | 0.26961 | 0.99765 |
| 0.32363 | 0.53191 | 0.26971 | 0.38828 | 0.2697  | 0.75354 | 0.2697  | 0.99819 |
| 0.32374 | 0.53219 | 0.2698  | 0.38864 | 0.26979 | 0.75381 | 0.26979 | 0.99819 |
| 0.32385 | 0.53255 | 0.26989 | 0.38883 | 0.26988 | 0.75418 | 0.26989 | 0.99856 |
| 0.32397 | 0.53264 | 0.26998 | 0.38892 | 0.26998 | 0.75445 | 0.26998 | 0.99911 |
| 0.32408 | 0.533   | 0.27008 | 0.38928 | 0.27007 | 0.75481 | 0.27007 | 0.99937 |
| 0.32419 | 0.53364 | 0.27016 | 0.38974 | 0.27016 | 0.75517 | 0.27016 | 1.00001 |
| 0.3243  | 0.53337 | 0.27026 | 0.38983 | 0.27025 | 0.75554 | 0.27025 | 1.00056 |
| 0.32441 | 0.53364 | 0.27036 | 0.38992 | 0.27034 | 0.7559  | 0.27035 | 1.00092 |

|         |         |         |         |         |         |         |         |
|---------|---------|---------|---------|---------|---------|---------|---------|
| 0.32453 | 0.53437 | 0.27045 | 0.39011 | 0.27044 | 0.75627 | 0.27044 | 1.00129 |
| 0.32463 | 0.53446 | 0.27054 | 0.39065 | 0.27053 | 0.75673 | 0.27053 | 1.00183 |
| 0.32475 | 0.53464 | 0.27063 | 0.39101 | 0.27062 | 0.75718 | 0.27062 | 1.00229 |
| 0.32485 | 0.5351  | 0.27072 | 0.39129 | 0.27072 | 0.75745 | 0.27072 | 1.00293 |
| 0.32497 | 0.53528 | 0.27081 | 0.39156 | 0.27081 | 0.758   | 0.27081 | 1.00311 |
| 0.32508 | 0.53518 | 0.27091 | 0.39184 | 0.2709  | 0.75818 | 0.2709  | 1.00302 |
| 0.32519 | 0.53564 | 0.27101 | 0.39211 | 0.27099 | 0.75855 | 0.271   | 1.00348 |
| 0.3253  | 0.5361  | 0.27109 | 0.39211 | 0.27109 | 0.75872 | 0.27108 | 1.00402 |
| 0.32541 | 0.5361  | 0.27119 | 0.39256 | 0.27117 | 0.75909 | 0.27118 | 1.00457 |
| 0.32552 | 0.53637 | 0.27128 | 0.39301 | 0.27127 | 0.75936 | 0.27127 | 1.00502 |
| 0.32563 | 0.53683 | 0.27137 | 0.39338 | 0.27137 | 0.76037 | 0.27137 | 1.00621 |
| 0.32575 | 0.53737 | 0.27147 | 0.39383 | 0.27146 | 0.76055 | 0.27146 | 1.00648 |
| 0.32586 | 0.53747 | 0.27156 | 0.39401 | 0.27155 | 0.76082 | 0.27155 | 1.00666 |
| 0.32597 | 0.53755 | 0.27165 | 0.39411 | 0.27164 | 0.76091 | 0.27165 | 1.00703 |
| 0.32608 | 0.53773 | 0.27174 | 0.3942  | 0.27173 | 0.76136 | 0.27173 | 1.0073  |
| 0.32619 | 0.53819 | 0.27184 | 0.39447 | 0.27183 | 0.76155 | 0.27183 | 1.00766 |
| 0.3263  | 0.53865 | 0.27193 | 0.39474 | 0.27192 | 0.762   | 0.27193 | 1.00839 |
| 0.32641 | 0.53883 | 0.27202 | 0.39529 | 0.27201 | 0.76227 | 0.27201 | 1.00894 |
| 0.32652 | 0.53883 | 0.27212 | 0.39566 | 0.2721  | 0.76264 | 0.27211 | 1.0093  |
| 0.32664 | 0.53892 | 0.2722  | 0.39593 | 0.2722  | 0.76301 | 0.2722  | 1.00976 |
| 0.32674 | 0.5391  | 0.2723  | 0.39611 | 0.27229 | 0.76319 | 0.27229 | 1.01039 |
| 0.32686 | 0.53974 | 0.27239 | 0.3962  | 0.27238 | 0.76337 | 0.27238 | 1.0113  |
| 0.32696 | 0.5401  | 0.27248 | 0.39638 | 0.27248 | 0.76401 | 0.27248 | 1.01139 |
| 0.32708 | 0.54046 | 0.27257 | 0.39675 | 0.27257 | 0.76446 | 0.27257 | 1.01121 |
| 0.32719 | 0.54046 | 0.27267 | 0.3972  | 0.27266 | 0.76482 | 0.27266 | 1.01203 |
| 0.3273  | 0.54037 | 0.27276 | 0.39748 | 0.27275 | 0.76518 | 0.27276 | 1.01258 |
| 0.32741 | 0.54083 | 0.27285 | 0.39757 | 0.27285 | 0.76537 | 0.27285 | 1.01312 |
| 0.32752 | 0.54128 | 0.27295 | 0.39775 | 0.27294 | 0.76574 | 0.27294 | 1.01385 |
| 0.32764 | 0.54165 | 0.27304 | 0.39812 | 0.27303 | 0.7661  | 0.27303 | 1.01376 |
| 0.32774 | 0.54183 | 0.27313 | 0.39866 | 0.27312 | 0.76646 | 0.27312 | 1.01403 |
| 0.32786 | 0.54211 | 0.27323 | 0.39866 | 0.27321 | 0.76673 | 0.27322 | 1.01503 |
| 0.32796 | 0.54202 | 0.27332 | 0.39911 | 0.27331 | 0.76701 | 0.27331 | 1.01576 |
| 0.32808 | 0.54237 | 0.27341 | 0.39939 | 0.2734  | 0.76765 | 0.2734  | 1.01585 |
| 0.32819 | 0.54265 | 0.2735  | 0.39957 | 0.27349 | 0.76801 | 0.27349 | 1.0164  |
| 0.3283  | 0.54293 | 0.2736  | 0.39975 | 0.27359 | 0.7681  | 0.27359 | 1.01722 |
| 0.32841 | 0.54302 | 0.27369 | 0.40012 | 0.27368 | 0.76837 | 0.27368 | 1.0174  |
| 0.32852 | 0.54329 | 0.27378 | 0.40039 | 0.27377 | 0.76901 | 0.27377 | 1.01813 |
| 0.32863 | 0.54356 | 0.27387 | 0.40066 | 0.27386 | 0.76946 | 0.27387 | 1.01912 |
| 0.32875 | 0.54429 | 0.27396 | 0.40112 | 0.27396 | 0.76974 | 0.27396 | 1.01931 |
| 0.32885 | 0.54429 | 0.27406 | 0.40148 | 0.27404 | 0.77011 | 0.27405 | 1.01949 |
| 0.32897 | 0.54429 | 0.27415 | 0.40148 | 0.27414 | 0.77038 | 0.27414 | 1.0204  |
| 0.32908 | 0.54474 | 0.27424 | 0.40166 | 0.27424 | 0.77074 | 0.27424 | 1.02068 |
| 0.32919 | 0.54511 | 0.27433 | 0.40211 | 0.27432 | 0.77074 | 0.27433 | 1.02095 |
| 0.3293  | 0.54511 | 0.27443 | 0.4023  | 0.27442 | 0.77065 | 0.27442 | 1.02167 |
| 0.32941 | 0.54538 | 0.27452 | 0.40266 | 0.27451 | 0.77128 | 0.27452 | 1.02158 |
| 0.32953 | 0.54566 | 0.27461 | 0.40284 | 0.27461 | 0.77165 | 0.27461 | 1.02231 |
| 0.32963 | 0.54602 | 0.27471 | 0.40303 | 0.27469 | 0.77219 | 0.2747  | 1.02295 |
| 0.32975 | 0.54629 | 0.2748  | 0.4033  | 0.27479 | 0.77265 | 0.27479 | 1.02349 |
| 0.32985 | 0.54675 | 0.27489 | 0.40367 | 0.27488 | 0.77274 | 0.27488 | 1.02377 |
| 0.32997 | 0.54693 | 0.27499 | 0.40385 | 0.27497 | 0.77311 | 0.27498 | 1.02404 |
| 0.33007 | 0.54711 | 0.27507 | 0.40421 | 0.27507 | 0.77365 | 0.27507 | 1.02422 |
| 0.33019 | 0.54738 | 0.27517 | 0.40448 | 0.27516 | 0.77365 | 0.27516 | 1.02468 |
| 0.3303  | 0.54765 | 0.27526 | 0.40494 | 0.27525 | 0.77402 | 0.27525 | 1.0255  |
| 0.33041 | 0.54793 | 0.27536 | 0.40503 | 0.27535 | 0.77456 | 0.27535 | 1.0255  |

|         |         |         |         |         |         |         |         |
|---------|---------|---------|---------|---------|---------|---------|---------|
| 0.33052 | 0.54829 | 0.27544 | 0.4053  | 0.27544 | 0.77483 | 0.27544 | 1.02622 |
| 0.33063 | 0.54839 | 0.27554 | 0.40558 | 0.27553 | 0.77529 | 0.27553 | 1.02659 |
| 0.33075 | 0.54875 | 0.27564 | 0.40585 | 0.27562 | 0.77538 | 0.27563 | 1.02668 |
| 0.33086 | 0.54912 | 0.27572 | 0.40613 | 0.27572 | 0.77566 | 0.27572 | 1.02696 |
| 0.33097 | 0.54939 | 0.27582 | 0.40649 | 0.27581 | 0.77602 | 0.27581 | 1.02796 |
| 0.33108 | 0.54966 | 0.27591 | 0.40649 | 0.2759  | 0.77629 | 0.2759  | 1.02823 |
| 0.33119 | 0.54993 | 0.276   | 0.40694 | 0.276   | 0.77693 | 0.27599 | 1.02832 |
| 0.3313  | 0.5502  | 0.27609 | 0.40731 | 0.27608 | 0.77738 | 0.27608 | 1.02877 |
| 0.33141 | 0.55029 | 0.27619 | 0.40776 | 0.27618 | 0.77766 | 0.27618 | 1.02932 |
| 0.33152 | 0.55057 | 0.27628 | 0.40786 | 0.27627 | 0.77775 | 0.27628 | 1.02996 |
| 0.33164 | 0.55102 | 0.27637 | 0.4083  | 0.27637 | 0.77811 | 0.27636 | 1.03105 |
| 0.33174 | 0.55112 | 0.27647 | 0.40867 | 0.27646 | 0.77856 | 0.27646 | 1.03105 |
| 0.33186 | 0.55166 | 0.27656 | 0.40894 | 0.27655 | 0.77921 | 0.27655 | 1.03105 |
| 0.33196 | 0.55166 | 0.27665 | 0.40903 | 0.27664 | 0.77911 | 0.27664 | 1.03196 |
| 0.33208 | 0.55212 | 0.27675 | 0.40922 | 0.27673 | 0.77929 | 0.27674 | 1.03233 |
| 0.33219 | 0.5523  | 0.27683 | 0.40958 | 0.27683 | 0.77966 | 0.27683 | 1.03315 |
| 0.3323  | 0.5523  | 0.27693 | 0.40976 | 0.27692 | 0.78012 | 0.27692 | 1.03351 |
| 0.33241 | 0.55257 | 0.27702 | 0.41022 | 0.27701 | 0.78048 | 0.27701 | 1.03396 |
| 0.33252 | 0.55321 | 0.27712 | 0.41049 | 0.27711 | 0.78066 | 0.27711 | 1.03414 |
| 0.33264 | 0.55321 | 0.2772  | 0.41085 | 0.2772  | 0.7812  | 0.2772  | 1.03497 |
| 0.33274 | 0.55339 | 0.2773  | 0.41094 | 0.27729 | 0.78139 | 0.27729 | 1.03506 |
| 0.33286 | 0.55384 | 0.27739 | 0.41159 | 0.27738 | 0.78184 | 0.27739 | 1.0356  |
| 0.33297 | 0.55375 | 0.27748 | 0.41177 | 0.27747 | 0.78221 | 0.27747 | 1.03633 |
| 0.33308 | 0.55421 | 0.27758 | 0.41195 | 0.27757 | 0.78239 | 0.27757 | 1.03642 |
| 0.33319 | 0.55475 | 0.27767 | 0.41222 | 0.27766 | 0.78258 | 0.27766 | 1.03697 |
| 0.3333  | 0.55475 | 0.27776 | 0.41231 | 0.27775 | 0.78293 | 0.27775 | 1.03706 |
| 0.33341 | 0.55512 | 0.27785 | 0.41295 | 0.27784 | 0.78312 | 0.27785 | 1.0376  |
| 0.33352 | 0.55548 | 0.27795 | 0.41341 | 0.27794 | 0.78357 | 0.27794 | 1.03842 |
| 0.33363 | 0.55566 | 0.27804 | 0.41331 | 0.27803 | 0.7843  | 0.27804 | 1.03906 |
| 0.33375 | 0.55585 | 0.27813 | 0.41386 | 0.27812 | 0.78457 | 0.27812 | 1.03952 |
| 0.33385 | 0.55612 | 0.27823 | 0.41413 | 0.27822 | 0.78439 | 0.27822 | 1.03979 |
| 0.33397 | 0.5563  | 0.27832 | 0.41423 | 0.27831 | 0.78503 | 0.27831 | 1.04024 |
| 0.33408 | 0.55658 | 0.27841 | 0.4145  | 0.2784  | 0.78522 | 0.2784  | 1.04079 |
| 0.33419 | 0.55694 | 0.2785  | 0.41459 | 0.27849 | 0.7853  | 0.2785  | 1.04133 |
| 0.3343  | 0.55721 | 0.2786  | 0.41495 | 0.27859 | 0.78612 | 0.27859 | 1.04198 |
| 0.33441 | 0.55748 | 0.27869 | 0.41504 | 0.27868 | 0.78648 | 0.27868 | 1.04243 |
| 0.33453 | 0.55785 | 0.27878 | 0.41532 | 0.27877 | 0.78667 | 0.27877 | 1.0428  |
| 0.33463 | 0.55839 | 0.27887 | 0.41631 | 0.27887 | 0.78694 | 0.27887 | 1.04343 |
| 0.33475 | 0.55867 | 0.27896 | 0.41659 | 0.27896 | 0.7873  | 0.27896 | 1.04352 |
| 0.33485 | 0.55867 | 0.27906 | 0.4164  | 0.27905 | 0.78758 | 0.27905 | 1.04407 |
| 0.33497 | 0.55885 | 0.27915 | 0.41686 | 0.27914 | 0.78812 | 0.27915 | 1.04471 |
| 0.33508 | 0.55894 | 0.27924 | 0.41732 | 0.27924 | 0.78867 | 0.27924 | 1.04507 |
| 0.33519 | 0.55922 | 0.27934 | 0.41759 | 0.27933 | 0.78895 | 0.27933 | 1.0457  |
| 0.3353  | 0.55949 | 0.27943 | 0.41768 | 0.27942 | 0.78921 | 0.27942 | 1.04616 |
| 0.33541 | 0.55958 | 0.27952 | 0.41786 | 0.27951 | 0.78921 | 0.27951 | 1.04625 |
| 0.33552 | 0.55995 | 0.27961 | 0.41786 | 0.2796  | 0.78958 | 0.2796  | 1.04671 |
| 0.33563 | 0.56049 | 0.27971 | 0.41813 | 0.2797  | 0.78977 | 0.2797  | 1.0477  |
| 0.33575 | 0.56085 | 0.2798  | 0.4185  | 0.27979 | 0.79031 | 0.27979 | 1.0477  |
| 0.33585 | 0.56112 | 0.27989 | 0.41868 | 0.27988 | 0.79067 | 0.27988 | 1.04807 |
| 0.33597 | 0.56122 | 0.27998 | 0.41914 | 0.27998 | 0.79122 | 0.27998 | 1.0488  |
| 0.33608 | 0.56122 | 0.28007 | 0.41969 | 0.28007 | 0.79149 | 0.28007 | 1.04935 |
| 0.33619 | 0.56158 | 0.28017 | 0.41987 | 0.28016 | 0.79149 | 0.28016 | 1.0498  |
| 0.3363  | 0.56194 | 0.28027 | 0.42023 | 0.28025 | 0.79186 | 0.28026 | 1.05034 |
| 0.33641 | 0.56204 | 0.28035 | 0.42032 | 0.28035 | 0.79222 | 0.28035 | 1.05026 |



|         |         |         |         |         |         |         |         |
|---------|---------|---------|---------|---------|---------|---------|---------|
| 0.33652 | 0.56267 | 0.28045 | 0.4205  | 0.28043 | 0.7924  | 0.28044 | 1.05062 |
| 0.33664 | 0.56295 | 0.28054 | 0.42068 | 0.28053 | 0.79286 | 0.28053 | 1.05144 |
| 0.33674 | 0.56313 | 0.28063 | 0.42132 | 0.28063 | 0.79349 | 0.28063 | 1.05181 |
| 0.33686 | 0.5634  | 0.28072 | 0.42132 | 0.28072 | 0.79395 | 0.28072 | 1.05198 |
| 0.33696 | 0.56331 | 0.28082 | 0.42178 | 0.28081 | 0.79377 | 0.28081 | 1.05253 |
| 0.33708 | 0.56358 | 0.28091 | 0.42215 | 0.2809  | 0.79413 | 0.28091 | 1.05317 |
| 0.33719 | 0.56422 | 0.281   | 0.42215 | 0.28099 | 0.79458 | 0.28099 | 1.05353 |
| 0.3373  | 0.56422 | 0.2811  | 0.42233 | 0.28108 | 0.79467 | 0.28109 | 1.05399 |
| 0.33741 | 0.56441 | 0.28119 | 0.42296 | 0.28118 | 0.79477 | 0.28118 | 1.05454 |
| 0.33752 | 0.56477 | 0.28128 | 0.42333 | 0.28128 | 0.79523 | 0.28127 | 1.05536 |
| 0.33764 | 0.56486 | 0.28137 | 0.4236  | 0.28136 | 0.79595 | 0.28137 | 1.05553 |
| 0.33774 | 0.56513 | 0.28146 | 0.42387 | 0.28146 | 0.79632 | 0.28146 | 1.05581 |
| 0.33786 | 0.56568 | 0.28156 | 0.42387 | 0.28155 | 0.79632 | 0.28155 | 1.05654 |
| 0.33797 | 0.56595 | 0.28165 | 0.42406 | 0.28164 | 0.79677 | 0.28164 | 1.05727 |
| 0.33808 | 0.56604 | 0.28174 | 0.42415 | 0.28173 | 0.79704 | 0.28174 | 1.05718 |
| 0.33819 | 0.5664  | 0.28183 | 0.42432 | 0.28183 | 0.79713 | 0.28183 | 1.05781 |
| 0.3383  | 0.56668 | 0.28193 | 0.42478 | 0.28192 | 0.79768 | 0.28192 | 1.05808 |
| 0.33841 | 0.56659 | 0.28202 | 0.42524 | 0.28201 | 0.79796 | 0.28202 | 1.05799 |
| 0.33852 | 0.56704 | 0.28211 | 0.42533 | 0.28211 | 0.79832 | 0.28211 | 1.05872 |
| 0.33863 | 0.56732 | 0.28221 | 0.42569 | 0.2822  | 0.79895 | 0.2822  | 1.05927 |
| 0.33875 | 0.56768 | 0.2823  | 0.42614 | 0.28229 | 0.79868 | 0.28229 | 1.05973 |
| 0.33885 | 0.56822 | 0.28239 | 0.42624 | 0.28238 | 0.79932 | 0.28238 | 1.06045 |
| 0.33897 | 0.56822 | 0.28248 | 0.42642 | 0.28247 | 0.79987 | 0.28247 | 1.06108 |
| 0.33908 | 0.56859 | 0.28258 | 0.42696 | 0.28257 | 0.79996 | 0.28257 | 1.06155 |
| 0.33919 | 0.56905 | 0.28266 | 0.42715 | 0.28266 | 0.80032 | 0.28266 | 1.06236 |
| 0.3393  | 0.56923 | 0.28276 | 0.42751 | 0.28275 | 0.80077 | 0.28275 | 1.06336 |
| 0.33941 | 0.5695  | 0.28286 | 0.4277  | 0.28284 | 0.80105 | 0.28285 | 1.06273 |
| 0.33953 | 0.56932 | 0.28295 | 0.42788 | 0.28294 | 0.80114 | 0.28294 | 1.06336 |
| 0.33963 | 0.56959 | 0.28304 | 0.42815 | 0.28303 | 0.80159 | 0.28303 | 1.06409 |
| 0.33975 | 0.57004 | 0.28313 | 0.4286  | 0.28312 | 0.80177 | 0.28312 | 1.06455 |
| 0.33985 | 0.57041 | 0.28322 | 0.4286  | 0.28322 | 0.80223 | 0.28322 | 1.06491 |
| 0.33997 | 0.57069 | 0.28332 | 0.42897 | 0.28331 | 0.8026  | 0.28331 | 1.06527 |
| 0.34007 | 0.57114 | 0.28341 | 0.42961 | 0.2834  | 0.80287 | 0.2834  | 1.06591 |
| 0.34019 | 0.57123 | 0.2835  | 0.42961 | 0.28349 | 0.80342 | 0.2835  | 1.06591 |
| 0.3403  | 0.57142 | 0.28359 | 0.42988 | 0.28359 | 0.80414 | 0.28358 | 1.06628 |
| 0.34041 | 0.57178 | 0.28369 | 0.43015 | 0.28368 | 0.8045  | 0.28368 | 1.06682 |
| 0.34052 | 0.57223 | 0.28378 | 0.43024 | 0.28377 | 0.8046  | 0.28378 | 1.06764 |
| 0.34063 | 0.57241 | 0.28387 | 0.43069 | 0.28387 | 0.80487 | 0.28387 | 1.06792 |
| 0.34075 | 0.5725  | 0.28397 | 0.43115 | 0.28396 | 0.80515 | 0.28396 | 1.068   |
| 0.34086 | 0.57278 | 0.28406 | 0.43125 | 0.28405 | 0.80541 | 0.28405 | 1.06874 |
| 0.34097 | 0.57323 | 0.28415 | 0.43143 | 0.28414 | 0.80588 | 0.28414 | 1.06928 |
| 0.34108 | 0.57332 | 0.28424 | 0.4317  | 0.28423 | 0.80606 | 0.28423 | 1.06964 |
| 0.34119 | 0.57378 | 0.28434 | 0.43179 | 0.28433 | 0.8066  | 0.28433 | 1.0701  |
| 0.3413  | 0.57396 | 0.28442 | 0.43216 | 0.28442 | 0.80705 | 0.28442 | 1.07091 |
| 0.34141 | 0.57396 | 0.28452 | 0.4327  | 0.28451 | 0.80696 | 0.28451 | 1.07101 |
| 0.34152 | 0.57451 | 0.28462 | 0.43288 | 0.2846  | 0.8077  | 0.28461 | 1.07138 |
| 0.34164 | 0.57487 | 0.28471 | 0.43306 | 0.2847  | 0.80788 | 0.2847  | 1.07182 |
| 0.34174 | 0.57496 | 0.2848  | 0.43361 | 0.28479 | 0.80788 | 0.28479 | 1.0721  |
| 0.34186 | 0.57506 | 0.28489 | 0.43398 | 0.28488 | 0.80842 | 0.28488 | 1.07264 |
| 0.34196 | 0.57524 | 0.28498 | 0.43443 | 0.28498 | 0.80906 | 0.28498 | 1.07346 |
| 0.34208 | 0.57524 | 0.28508 | 0.43443 | 0.28506 | 0.80924 | 0.28507 | 1.07346 |
| 0.34219 | 0.57569 | 0.28517 | 0.43488 | 0.28516 | 0.8097  | 0.28516 | 1.0742  |
| 0.3423  | 0.57587 | 0.28526 | 0.43515 | 0.28525 | 0.8097  | 0.28526 | 1.07465 |
| 0.34241 | 0.57614 | 0.28535 | 0.43543 | 0.28534 | 0.80988 | 0.28534 | 1.07493 |

|         |         |         |         |         |         |         |         |
|---------|---------|---------|---------|---------|---------|---------|---------|
| 0.34252 | 0.57633 | 0.28545 | 0.43571 | 0.28544 | 0.81042 | 0.28544 | 1.07537 |
| 0.34264 | 0.57651 | 0.28554 | 0.43616 | 0.28553 | 0.81079 | 0.28553 | 1.07583 |
| 0.34274 | 0.57678 | 0.28563 | 0.43625 | 0.28563 | 0.81097 | 0.28563 | 1.07629 |
| 0.34286 | 0.57724 | 0.28573 | 0.43652 | 0.28571 | 0.81133 | 0.28572 | 1.07747 |
| 0.34297 | 0.57732 | 0.28582 | 0.43679 | 0.28581 | 0.81161 | 0.28581 | 1.07792 |
| 0.34308 | 0.5776  | 0.28591 | 0.43734 | 0.28591 | 0.81197 | 0.28591 | 1.07792 |
| 0.34319 | 0.57788 | 0.286   | 0.4377  | 0.28599 | 0.81234 | 0.28599 | 1.07875 |
| 0.3433  | 0.57824 | 0.28609 | 0.43798 | 0.28609 | 0.81242 | 0.28609 | 1.07957 |
| 0.34341 | 0.57851 | 0.28618 | 0.43852 | 0.28618 | 0.81297 | 0.28618 | 1.07938 |
| 0.34352 | 0.57869 | 0.28628 | 0.43862 | 0.28627 | 0.81334 | 0.28627 | 1.07957 |
| 0.34363 | 0.57888 | 0.28638 | 0.4388  | 0.28636 | 0.81379 | 0.28637 | 1.08039 |
| 0.34375 | 0.5796  | 0.28646 | 0.43898 | 0.28646 | 0.81388 | 0.28646 | 1.08102 |
| 0.34385 | 0.58024 | 0.28656 | 0.43935 | 0.28655 | 0.81424 | 0.28655 | 1.0813  |
| 0.34397 | 0.58015 | 0.28665 | 0.43971 | 0.28664 | 0.8147  | 0.28664 | 1.08202 |
| 0.34408 | 0.58015 | 0.28674 | 0.43989 | 0.28674 | 0.81507 | 0.28674 | 1.08266 |
| 0.34419 | 0.58043 | 0.28684 | 0.44007 | 0.28683 | 0.81515 | 0.28683 | 1.08329 |
| 0.3443  | 0.58061 | 0.28693 | 0.44034 | 0.28692 | 0.81552 | 0.28692 | 1.08338 |
| 0.34441 | 0.58088 | 0.28702 | 0.4408  | 0.28701 | 0.81598 | 0.28702 | 1.08394 |
| 0.34453 | 0.58134 | 0.28711 | 0.44098 | 0.2871  | 0.81625 | 0.2871  | 1.08439 |
| 0.34463 | 0.58134 | 0.28721 | 0.44117 | 0.2872  | 0.81643 | 0.2872  | 1.0852  |
| 0.34475 | 0.58143 | 0.2873  | 0.44162 | 0.28729 | 0.8167  | 0.28729 | 1.08566 |
| 0.34485 | 0.58197 | 0.28739 | 0.44171 | 0.28739 | 0.81716 | 0.28739 | 1.08566 |
| 0.34497 | 0.58224 | 0.28749 | 0.44207 | 0.28747 | 0.81743 | 0.28748 | 1.08593 |
| 0.34508 | 0.58261 | 0.28758 | 0.44244 | 0.28757 | 0.81779 | 0.28757 | 1.08648 |
| 0.34519 | 0.58279 | 0.28767 | 0.44281 | 0.28766 | 0.81788 | 0.28766 | 1.08703 |
| 0.3453  | 0.58288 | 0.28776 | 0.44298 | 0.28775 | 0.81835 | 0.28775 | 1.08739 |
| 0.34541 | 0.58324 | 0.28785 | 0.44298 | 0.28785 | 0.81898 | 0.28785 | 1.08784 |
| 0.34552 | 0.58352 | 0.28794 | 0.44308 | 0.28794 | 0.81907 | 0.28794 | 1.08839 |
| 0.34563 | 0.58352 | 0.28804 | 0.44335 | 0.28803 | 0.81925 | 0.28803 | 1.08894 |
| 0.34575 | 0.58397 | 0.28813 | 0.44362 | 0.28812 | 0.81953 | 0.28813 | 1.08948 |
| 0.34586 | 0.58424 | 0.28822 | 0.44372 | 0.28822 | 0.81962 | 0.28822 | 1.09012 |
| 0.34597 | 0.58452 | 0.28832 | 0.44417 | 0.28831 | 0.82016 | 0.28831 | 1.09067 |
| 0.34608 | 0.58479 | 0.28841 | 0.44472 | 0.2884  | 0.82052 | 0.2884  | 1.09094 |
| 0.34619 | 0.58507 | 0.2885  | 0.44517 | 0.2885  | 0.82061 | 0.2885  | 1.09131 |
| 0.3463  | 0.58488 | 0.2886  | 0.44499 | 0.28859 | 0.82107 | 0.28859 | 1.09194 |
| 0.34641 | 0.58515 | 0.28869 | 0.44545 | 0.28868 | 0.82135 | 0.28868 | 1.09176 |
| 0.34652 | 0.5857  | 0.28878 | 0.44581 | 0.28877 | 0.82162 | 0.28877 | 1.09158 |
| 0.34664 | 0.58588 | 0.28887 | 0.44608 | 0.28887 | 0.82217 | 0.28886 | 1.09194 |
| 0.34674 | 0.58606 | 0.28897 | 0.44635 | 0.28896 | 0.82253 | 0.28896 | 1.0923  |
| 0.34686 | 0.58634 | 0.28906 | 0.44644 | 0.28905 | 0.82289 | 0.28905 | 1.09276 |
| 0.34696 | 0.58634 | 0.28915 | 0.4469  | 0.28914 | 0.82326 | 0.28914 | 1.09349 |
| 0.34708 | 0.58671 | 0.28925 | 0.44708 | 0.28923 | 0.82335 | 0.28924 | 1.0934  |
| 0.34719 | 0.58716 | 0.28933 | 0.44717 | 0.28933 | 0.8238  | 0.28933 | 1.09422 |
| 0.3473  | 0.58752 | 0.28943 | 0.44754 | 0.28942 | 0.82426 | 0.28942 | 1.09449 |
| 0.34741 | 0.58788 | 0.28952 | 0.44781 | 0.28951 | 0.8249  | 0.28951 | 1.09494 |
| 0.34752 | 0.5878  | 0.28962 | 0.44781 | 0.28961 | 0.82508 | 0.28961 | 1.09595 |
| 0.34764 | 0.58825 | 0.2897  | 0.44817 | 0.2897  | 0.82517 | 0.2897  | 1.09685 |
| 0.34774 | 0.58834 | 0.2898  | 0.44844 | 0.28979 | 0.82553 | 0.28979 | 1.09759 |
| 0.34786 | 0.58889 | 0.28989 | 0.44872 | 0.28988 | 0.82589 | 0.28989 | 1.09776 |
| 0.34797 | 0.58925 | 0.28998 | 0.44908 | 0.28998 | 0.82608 | 0.28998 | 1.09804 |
| 0.34808 | 0.58944 | 0.29008 | 0.44926 | 0.29007 | 0.82635 | 0.29007 | 1.09904 |
| 0.34819 | 0.58989 | 0.29017 | 0.44963 | 0.29016 | 0.82671 | 0.29016 | 1.09977 |
| 0.3483  | 0.58998 | 0.29026 | 0.44972 | 0.29025 | 0.8269  | 0.29025 | 1.09996 |
| 0.34841 | 0.58998 | 0.29036 | 0.45026 | 0.29034 | 0.82726 | 0.29035 | 1.1005  |

|         |         |         |         |         |         |         |         |
|---------|---------|---------|---------|---------|---------|---------|---------|
| 0.34852 | 0.59053 | 0.29045 | 0.45063 | 0.29044 | 0.82745 | 0.29044 | 1.10105 |
| 0.34863 | 0.59062 | 0.29054 | 0.45099 | 0.29053 | 0.82808 | 0.29054 | 1.10095 |
| 0.34875 | 0.5908  | 0.29063 | 0.45117 | 0.29062 | 0.82844 | 0.29062 | 1.10105 |
| 0.34885 | 0.59117 | 0.29073 | 0.45163 | 0.29072 | 0.82863 | 0.29072 | 1.1015  |
| 0.34897 | 0.59135 | 0.29081 | 0.45199 | 0.29081 | 0.82917 | 0.29081 | 1.10178 |
| 0.34908 | 0.59171 | 0.29091 | 0.45227 | 0.2909  | 0.82981 | 0.2909  | 1.10259 |
| 0.34919 | 0.59171 | 0.291   | 0.45263 | 0.29099 | 0.83018 | 0.291   | 1.10359 |
| 0.3493  | 0.59207 | 0.29109 | 0.45291 | 0.29109 | 0.83008 | 0.29109 | 1.10378 |
| 0.34941 | 0.59244 | 0.29119 | 0.45327 | 0.29118 | 0.83008 | 0.29118 | 1.10414 |
| 0.34953 | 0.59253 | 0.29128 | 0.45345 | 0.29127 | 0.83063 | 0.29127 | 1.10441 |
| 0.34963 | 0.59253 | 0.29137 | 0.45364 | 0.29137 | 0.83072 | 0.29137 | 1.10486 |
| 0.34975 | 0.59298 | 0.29146 | 0.45391 | 0.29146 | 0.83063 | 0.29146 | 1.10496 |
| 0.34985 | 0.59334 | 0.29156 | 0.45418 | 0.29155 | 0.83099 | 0.29155 | 1.10523 |
| 0.34997 | 0.59371 | 0.29165 | 0.45427 | 0.29164 | 0.83117 | 0.29165 | 1.10587 |
| 0.35007 | 0.5938  | 0.29174 | 0.45436 | 0.29173 | 0.83145 | 0.29173 | 1.10614 |
| 0.35019 | 0.5938  | 0.29184 | 0.45509 | 0.29182 | 0.83191 | 0.29183 | 1.10678 |
| 0.3503  | 0.59435 | 0.29193 | 0.45527 | 0.29192 | 0.83263 | 0.29192 | 1.10741 |
| 0.35041 | 0.59462 | 0.29202 | 0.45554 | 0.29201 | 0.83272 | 0.29201 | 1.10796 |
| 0.35052 | 0.59471 | 0.29212 | 0.45582 | 0.2921  | 0.83299 | 0.2921  | 1.10824 |
| 0.35063 | 0.59499 | 0.29221 | 0.45609 | 0.2922  | 0.83355 | 0.2922  | 1.10869 |
| 0.35075 | 0.59508 | 0.2923  | 0.45645 | 0.29229 | 0.83355 | 0.2923  | 1.10897 |
| 0.35086 | 0.59526 | 0.29239 | 0.45645 | 0.29238 | 0.83427 | 0.29238 | 1.1096  |
| 0.35097 | 0.59589 | 0.29248 | 0.45682 | 0.29248 | 0.83454 | 0.29248 | 1.11006 |
| 0.35108 | 0.59562 | 0.29257 | 0.45727 | 0.29257 | 0.8349  | 0.29257 | 1.11033 |
| 0.35119 | 0.59617 | 0.29267 | 0.45727 | 0.29266 | 0.83536 | 0.29266 | 1.11115 |
| 0.3513  | 0.59645 | 0.29276 | 0.45773 | 0.29275 | 0.83591 | 0.29276 | 1.1117  |
| 0.35141 | 0.59671 | 0.29285 | 0.45819 | 0.29285 | 0.836   | 0.29285 | 1.11197 |
| 0.35152 | 0.59689 | 0.29295 | 0.45819 | 0.29294 | 0.83591 | 0.29294 | 1.11224 |
| 0.35164 | 0.59726 | 0.29304 | 0.45827 | 0.29303 | 0.83627 | 0.29303 | 1.11269 |
| 0.35174 | 0.59736 | 0.29313 | 0.45882 | 0.29313 | 0.83682 | 0.29313 | 1.11306 |
| 0.35186 | 0.59781 | 0.29322 | 0.45937 | 0.29322 | 0.83709 | 0.29322 | 1.11388 |
| 0.35196 | 0.59808 | 0.29332 | 0.45974 | 0.29331 | 0.83773 | 0.29331 | 1.11397 |
| 0.35208 | 0.59835 | 0.29341 | 0.4601  | 0.2934  | 0.83782 | 0.2934  | 1.11443 |
| 0.35219 | 0.59863 | 0.2935  | 0.46046 | 0.29349 | 0.83809 | 0.29349 | 1.11488 |
| 0.3523  | 0.59872 | 0.2936  | 0.46055 | 0.29358 | 0.83873 | 0.29359 | 1.11497 |
| 0.35241 | 0.5989  | 0.29368 | 0.46082 | 0.29368 | 0.83901 | 0.29368 | 1.11524 |
| 0.35252 | 0.59935 | 0.29378 | 0.46101 | 0.29377 | 0.83918 | 0.29377 | 1.11616 |
| 0.35264 | 0.59963 | 0.29388 | 0.4611  | 0.29386 | 0.83973 | 0.29387 | 1.11688 |
| 0.35274 | 0.59981 | 0.29397 | 0.46165 | 0.29396 | 0.83982 | 0.29396 | 1.1167  |
| 0.35286 | 0.59999 | 0.29406 | 0.46201 | 0.29405 | 0.84028 | 0.29405 | 1.11716 |
| 0.35297 | 0.59999 | 0.29415 | 0.46237 | 0.29414 | 0.84037 | 0.29414 | 1.11761 |
| 0.35308 | 0.60036 | 0.29425 | 0.46246 | 0.29424 | 0.84083 | 0.29424 | 1.1177  |
| 0.35319 | 0.60109 | 0.29433 | 0.46273 | 0.29433 | 0.8411  | 0.29433 | 1.11825 |
| 0.3533  | 0.60117 | 0.29443 | 0.46328 | 0.29442 | 0.84119 | 0.29442 | 1.11889 |
| 0.35341 | 0.60081 | 0.29452 | 0.46373 | 0.29451 | 0.84137 | 0.29452 | 1.1197  |
| 0.35352 | 0.60135 | 0.29461 | 0.4641  | 0.29461 | 0.84173 | 0.29461 | 1.11989 |
| 0.35363 | 0.60181 | 0.29471 | 0.46392 | 0.29469 | 0.84201 | 0.2947  | 1.11979 |
| 0.35375 | 0.60208 | 0.2948  | 0.46429 | 0.29479 | 0.84228 | 0.29479 | 1.12052 |
| 0.35385 | 0.60236 | 0.29489 | 0.46446 | 0.29488 | 0.84264 | 0.29489 | 1.12125 |
| 0.35397 | 0.60281 | 0.29498 | 0.46474 | 0.29498 | 0.8431  | 0.29498 | 1.1218  |
| 0.35408 | 0.60299 | 0.29508 | 0.46501 | 0.29507 | 0.84337 | 0.29507 | 1.12243 |
| 0.35419 | 0.60327 | 0.29517 | 0.46546 | 0.29516 | 0.84383 | 0.29517 | 1.12279 |
| 0.3543  | 0.6039  | 0.29526 | 0.46583 | 0.29525 | 0.84365 | 0.29525 | 1.12307 |
| 0.35441 | 0.60372 | 0.29536 | 0.46601 | 0.29534 | 0.84392 | 0.29535 | 1.12353 |

|         |         |         |         |         |         |         |         |
|---------|---------|---------|---------|---------|---------|---------|---------|
| 0.35453 | 0.604   | 0.29544 | 0.46628 | 0.29544 | 0.8441  | 0.29544 | 1.12371 |
| 0.35463 | 0.60427 | 0.29554 | 0.46665 | 0.29553 | 0.84419 | 0.29553 | 1.1238  |
| 0.35475 | 0.60436 | 0.29563 | 0.46719 | 0.29562 | 0.84456 | 0.29562 | 1.12498 |
| 0.35485 | 0.60464 | 0.29573 | 0.46737 | 0.29572 | 0.84519 | 0.29572 | 1.12553 |
| 0.35497 | 0.60491 | 0.29581 | 0.46765 | 0.29581 | 0.84547 | 0.29581 | 1.12571 |
| 0.35508 | 0.60536 | 0.29591 | 0.46793 | 0.2959  | 0.84538 | 0.2959  | 1.12599 |
| 0.35519 | 0.60554 | 0.296   | 0.46847 | 0.29599 | 0.84574 | 0.296   | 1.12653 |
| 0.3553  | 0.60572 | 0.29609 | 0.46893 | 0.29609 | 0.84583 | 0.29609 | 1.12707 |
| 0.35541 | 0.60618 | 0.29619 | 0.46911 | 0.29618 | 0.84638 | 0.29618 | 1.12762 |
| 0.35552 | 0.60637 | 0.29628 | 0.4692  | 0.29627 | 0.84674 | 0.29627 | 1.12808 |
| 0.35563 | 0.60663 | 0.29637 | 0.46938 | 0.29636 | 0.84674 | 0.29636 | 1.12872 |
| 0.35575 | 0.60663 | 0.29647 | 0.46992 | 0.29645 | 0.84702 | 0.29646 | 1.12908 |
| 0.35586 | 0.60728 | 0.29656 | 0.47038 | 0.29655 | 0.84747 | 0.29655 | 1.12944 |
| 0.35597 | 0.60746 | 0.29665 | 0.47047 | 0.29664 | 0.84765 | 0.29665 | 1.1298  |
| 0.35608 | 0.60809 | 0.29674 | 0.47074 | 0.29673 | 0.84783 | 0.29673 | 1.13026 |
| 0.35619 | 0.60836 | 0.29684 | 0.47102 | 0.29683 | 0.84811 | 0.29683 | 1.13026 |
| 0.3563  | 0.60846 | 0.29693 | 0.47148 | 0.29692 | 0.84847 | 0.29693 | 1.1308  |
| 0.35641 | 0.60836 | 0.29702 | 0.47193 | 0.29701 | 0.84883 | 0.29701 | 1.13135 |
| 0.35652 | 0.60882 | 0.29712 | 0.47211 | 0.2971  | 0.8492  | 0.29711 | 1.13181 |
| 0.35664 | 0.60909 | 0.29721 | 0.47238 | 0.2972  | 0.84938 | 0.2972  | 1.13217 |
| 0.35674 | 0.60909 | 0.2973  | 0.47256 | 0.29729 | 0.84938 | 0.29729 | 1.13263 |
| 0.35686 | 0.60918 | 0.29739 | 0.47302 | 0.29738 | 0.85011 | 0.29738 | 1.13318 |
| 0.35696 | 0.60955 | 0.29748 | 0.4732  | 0.29748 | 0.85038 | 0.29748 | 1.13345 |
| 0.35708 | 0.60973 | 0.29757 | 0.47339 | 0.29757 | 0.85066 | 0.29757 | 1.13418 |
| 0.35719 | 0.61018 | 0.29767 | 0.47357 | 0.29766 | 0.85092 | 0.29766 | 1.13517 |
| 0.3573  | 0.61037 | 0.29776 | 0.47411 | 0.29775 | 0.85111 | 0.29776 | 1.13545 |
| 0.35741 | 0.61046 | 0.29785 | 0.47421 | 0.29785 | 0.85148 | 0.29785 | 1.13618 |
| 0.35752 | 0.61083 | 0.29795 | 0.47439 | 0.29794 | 0.85202 | 0.29794 | 1.13627 |
| 0.35764 | 0.6111  | 0.29804 | 0.47484 | 0.29803 | 0.85265 | 0.29803 | 1.13654 |
| 0.35774 | 0.6111  | 0.29813 | 0.47512 | 0.29812 | 0.85302 | 0.29812 | 1.13736 |
| 0.35786 | 0.61164 | 0.29823 | 0.47539 | 0.29821 | 0.85302 | 0.29822 | 1.13781 |
| 0.35797 | 0.61155 | 0.29832 | 0.47575 | 0.29831 | 0.85348 | 0.29831 | 1.13809 |
| 0.35808 | 0.61182 | 0.29841 | 0.4762  | 0.2984  | 0.85366 | 0.2984  | 1.13827 |
| 0.35819 | 0.61219 | 0.2985  | 0.47648 | 0.29849 | 0.85393 | 0.29849 | 1.13855 |
| 0.3583  | 0.61246 | 0.29859 | 0.47675 | 0.29859 | 0.85448 | 0.29859 | 1.13891 |
| 0.35841 | 0.61273 | 0.29868 | 0.47694 | 0.29868 | 0.85484 | 0.29868 | 1.13963 |
| 0.35852 | 0.61319 | 0.29878 | 0.47721 | 0.29877 | 0.8552  | 0.29877 | 1.14037 |
| 0.35863 | 0.61356 | 0.29888 | 0.47776 | 0.29886 | 0.8552  | 0.29887 | 1.14046 |
| 0.35875 | 0.61374 | 0.29896 | 0.47785 | 0.29896 | 0.85539 | 0.29896 | 1.14091 |
| 0.35885 | 0.6141  | 0.29906 | 0.47812 | 0.29905 | 0.85593 | 0.29905 | 1.14155 |
| 0.35897 | 0.61401 | 0.29915 | 0.47839 | 0.29914 | 0.85621 | 0.29914 | 1.14182 |
| 0.35908 | 0.61383 | 0.29924 | 0.47893 | 0.29924 | 0.85666 | 0.29924 | 1.14273 |
| 0.35919 | 0.61456 | 0.29933 | 0.47949 | 0.29933 | 0.85694 | 0.29933 | 1.14301 |
| 0.3593  | 0.61492 | 0.29943 | 0.47957 | 0.29942 | 0.8573  | 0.29942 | 1.14355 |
| 0.35941 | 0.6151  | 0.29952 | 0.47957 | 0.29951 | 0.85766 | 0.29952 | 1.14392 |
| 0.35953 | 0.61528 | 0.29961 | 0.4803  | 0.2996  | 0.85793 | 0.2996  | 1.14446 |
| 0.35963 | 0.61528 | 0.29971 | 0.48076 | 0.2997  | 0.85803 | 0.2997  | 1.14473 |
| 0.35975 | 0.61537 | 0.2998  | 0.48103 | 0.29979 | 0.85858 | 0.29979 | 1.145   |
| 0.35985 | 0.61601 | 0.29989 | 0.4813  | 0.29989 | 0.85894 | 0.29989 | 1.14565 |
| 0.35997 | 0.6161  | 0.29999 | 0.48166 | 0.29997 | 0.85912 | 0.29998 | 1.14565 |
| 0.36007 | 0.61646 | 0.30007 | 0.48176 | 0.30007 | 0.8593  | 0.30007 | 1.14573 |
| 0.36019 | 0.61692 | 0.30017 | 0.48203 | 0.30016 | 0.85967 | 0.30016 | 1.14646 |
| 0.3603  | 0.61737 | 0.30026 | 0.4824  | 0.30025 | 0.86012 | 0.30025 | 1.14692 |
| 0.36041 | 0.61765 | 0.30035 | 0.48267 | 0.30035 | 0.8604  | 0.30035 | 1.14755 |

|         |         |         |         |         |         |         |         |
|---------|---------|---------|---------|---------|---------|---------|---------|
| 0.36052 | 0.61774 | 0.30044 | 0.48267 | 0.30044 | 0.8603  | 0.30044 | 1.1481  |
| 0.36063 | 0.61792 | 0.30054 | 0.48304 | 0.30053 | 0.86076 | 0.30053 | 1.14838 |
| 0.36075 | 0.61792 | 0.30064 | 0.48339 | 0.30062 | 0.86131 | 0.30063 | 1.14865 |
| 0.36086 | 0.61838 | 0.30072 | 0.48349 | 0.30072 | 0.86167 | 0.30072 | 1.14964 |
| 0.36097 | 0.61847 | 0.30082 | 0.48395 | 0.30081 | 0.86203 | 0.30081 | 1.1501  |
| 0.36108 | 0.61847 | 0.30091 | 0.48421 | 0.3009  | 0.8623  | 0.3009  | 1.15102 |
| 0.36119 | 0.61901 | 0.301   | 0.48449 | 0.301   | 0.8623  | 0.30099 | 1.15102 |
| 0.3613  | 0.61947 | 0.3011  | 0.48504 | 0.30108 | 0.86276 | 0.30109 | 1.15083 |
| 0.36142 | 0.61938 | 0.30119 | 0.48531 | 0.30118 | 0.86294 | 0.30118 | 1.15138 |
| 0.36152 | 0.61984 | 0.30128 | 0.48568 | 0.30127 | 0.8633  | 0.30127 | 1.15174 |
| 0.36164 | 0.62029 | 0.30137 | 0.48586 | 0.30136 | 0.86348 | 0.30136 | 1.15228 |
| 0.36174 | 0.62038 | 0.30147 | 0.48622 | 0.30146 | 0.86385 | 0.30146 | 1.15284 |
| 0.36186 | 0.62084 | 0.30156 | 0.48667 | 0.30155 | 0.86421 | 0.30155 | 1.15329 |
| 0.36196 | 0.6212  | 0.30165 | 0.48704 | 0.30164 | 0.86431 | 0.30164 | 1.15365 |
| 0.36208 | 0.62129 | 0.30175 | 0.48704 | 0.30173 | 0.86503 | 0.30174 | 1.15401 |
| 0.36219 | 0.62156 | 0.30184 | 0.48722 | 0.30183 | 0.86549 | 0.30183 | 1.15466 |
| 0.3623  | 0.62183 | 0.30193 | 0.48768 | 0.30192 | 0.86558 | 0.30192 | 1.15502 |
| 0.36241 | 0.62211 | 0.30202 | 0.48804 | 0.30201 | 0.86603 | 0.30201 | 1.1552  |
| 0.36252 | 0.62211 | 0.30211 | 0.4884  | 0.30211 | 0.86622 | 0.30211 | 1.15557 |
| 0.36264 | 0.62211 | 0.3022  | 0.48849 | 0.3022  | 0.86631 | 0.3022  | 1.15566 |
| 0.36274 | 0.62265 | 0.3023  | 0.48895 | 0.30229 | 0.86685 | 0.30229 | 1.15629 |
| 0.36286 | 0.62293 | 0.30239 | 0.48941 | 0.30238 | 0.86731 | 0.30239 | 1.15711 |
| 0.36297 | 0.62339 | 0.30248 | 0.48977 | 0.30248 | 0.86777 | 0.30248 | 1.15738 |
| 0.36308 | 0.62357 | 0.30258 | 0.49013 | 0.30257 | 0.86803 | 0.30257 | 1.15775 |
| 0.36319 | 0.62384 | 0.30267 | 0.49031 | 0.30266 | 0.86822 | 0.30266 | 1.15866 |
| 0.3633  | 0.62438 | 0.30276 | 0.49049 | 0.30275 | 0.86868 | 0.30275 | 1.15911 |
| 0.36341 | 0.62448 | 0.30285 | 0.49095 | 0.30284 | 0.86886 | 0.30285 | 1.15911 |
| 0.36352 | 0.62475 | 0.30295 | 0.49122 | 0.30294 | 0.86913 | 0.30294 | 1.15975 |
| 0.36363 | 0.62493 | 0.30304 | 0.4915  | 0.30303 | 0.86967 | 0.30303 | 1.16003 |
| 0.36375 | 0.62538 | 0.30313 | 0.49195 | 0.30312 | 0.86977 | 0.30312 | 1.16066 |
| 0.36385 | 0.62557 | 0.30323 | 0.49222 | 0.30322 | 0.87004 | 0.30322 | 1.16157 |
| 0.36397 | 0.62593 | 0.30332 | 0.49241 | 0.30331 | 0.8705  | 0.30331 | 1.16175 |
| 0.36408 | 0.62612 | 0.30341 | 0.49296 | 0.3034  | 0.87068 | 0.3034  | 1.16157 |
| 0.36419 | 0.6263  | 0.30351 | 0.49286 | 0.30349 | 0.87104 | 0.3035  | 1.15902 |
| 0.3643  | 0.62639 | 0.3036  | 0.49314 | 0.30359 | 0.87122 | 0.30359 | 1.15866 |
| 0.36441 | 0.62657 | 0.30369 | 0.49332 | 0.30368 | 0.87159 | 0.30368 | 1.1592  |
| 0.36453 | 0.62684 | 0.30378 | 0.49368 | 0.30377 | 0.87168 | 0.30377 | 1.16003 |
| 0.36463 | 0.62748 | 0.30387 | 0.49441 | 0.30387 | 0.87231 | 0.30387 | 1.16075 |
| 0.36475 | 0.62739 | 0.30396 | 0.49441 | 0.30395 | 0.8724  | 0.30396 | 1.16193 |
| 0.36485 | 0.62748 | 0.30406 | 0.49468 | 0.30405 | 0.87259 | 0.30405 | 1.16358 |
| 0.36497 | 0.62775 | 0.30415 | 0.49505 | 0.30414 | 0.87286 | 0.30415 | 1.16303 |
| 0.36508 | 0.62802 | 0.30424 | 0.49551 | 0.30424 | 0.87341 | 0.30424 | 1.16339 |
| 0.36519 | 0.6283  | 0.30434 | 0.49577 | 0.30433 | 0.87386 | 0.30433 | 1.16403 |
| 0.3653  | 0.62839 | 0.30443 | 0.49605 | 0.30442 | 0.87386 | 0.30442 | 1.16457 |
| 0.36541 | 0.62885 | 0.30452 | 0.49614 | 0.30452 | 0.87441 | 0.30452 | 1.16521 |
| 0.36552 | 0.6293  | 0.30461 | 0.49668 | 0.3046  | 0.87477 | 0.30461 | 1.16557 |
| 0.36563 | 0.62939 | 0.30471 | 0.49696 | 0.3047  | 0.87496 | 0.3047  | 1.16567 |
| 0.36575 | 0.62967 | 0.3048  | 0.49732 | 0.30479 | 0.87504 | 0.30479 | 1.16622 |
| 0.36586 | 0.62976 | 0.30489 | 0.4975  | 0.30488 | 0.8755  | 0.30488 | 1.16694 |
| 0.36597 | 0.63003 | 0.30499 | 0.49787 | 0.30498 | 0.87586 | 0.30498 | 1.16676 |
| 0.36608 | 0.6303  | 0.30507 | 0.49824 | 0.30507 | 0.87605 | 0.30507 | 1.16712 |
| 0.36619 | 0.63048 | 0.30517 | 0.4985  | 0.30516 | 0.87632 | 0.30516 | 1.16785 |
| 0.3663  | 0.63076 | 0.30527 | 0.49878 | 0.30525 | 0.87641 | 0.30526 | 1.16822 |
| 0.36641 | 0.63103 | 0.30535 | 0.49923 | 0.30535 | 0.87696 | 0.30535 | 1.16904 |

|         |         |         |         |         |         |         |         |
|---------|---------|---------|---------|---------|---------|---------|---------|
| 0.36652 | 0.63139 | 0.30545 | 0.49941 | 0.30544 | 0.87723 | 0.30544 | 1.16976 |
| 0.36664 | 0.63166 | 0.30554 | 0.49978 | 0.30553 | 0.87723 | 0.30553 | 1.17013 |
| 0.36674 | 0.63166 | 0.30563 | 0.50005 | 0.30563 | 0.87751 | 0.30563 | 1.17031 |
| 0.36686 | 0.63175 | 0.30573 | 0.50051 | 0.30571 | 0.87814 | 0.30572 | 1.17113 |
| 0.36696 | 0.63203 | 0.30582 | 0.50096 | 0.30581 | 0.87814 | 0.30581 | 1.17076 |
| 0.36708 | 0.6324  | 0.30591 | 0.50133 | 0.3059  | 0.87842 | 0.30591 | 1.17222 |
| 0.36719 | 0.63266 | 0.306   | 0.50169 | 0.306   | 0.87905 | 0.306   | 1.1725  |
| 0.3673  | 0.63303 | 0.3061  | 0.50196 | 0.30609 | 0.87932 | 0.30609 | 1.17286 |
| 0.36741 | 0.63303 | 0.30619 | 0.50233 | 0.30618 | 0.8796  | 0.30618 | 1.17359 |
| 0.36752 | 0.63339 | 0.30628 | 0.50251 | 0.30627 | 0.88006 | 0.30627 | 1.17386 |
| 0.36764 | 0.63357 | 0.30637 | 0.50296 | 0.30636 | 0.87996 | 0.30637 | 1.17459 |
| 0.36774 | 0.63394 | 0.30646 | 0.50333 | 0.30646 | 0.88014 | 0.30646 | 1.17504 |
| 0.36786 | 0.6344  | 0.30656 | 0.50351 | 0.30655 | 0.88051 | 0.30655 | 1.17541 |
| 0.36797 | 0.63458 | 0.30665 | 0.50379 | 0.30664 | 0.88115 | 0.30664 | 1.17541 |
| 0.36808 | 0.63485 | 0.30674 | 0.50406 | 0.30674 | 0.88124 | 0.30674 | 1.17559 |
| 0.36819 | 0.63503 | 0.30683 | 0.5046  | 0.30683 | 0.88187 | 0.30683 | 1.17631 |
| 0.3683  | 0.63521 | 0.30693 | 0.50497 | 0.30692 | 0.88224 | 0.30692 | 1.1765  |
| 0.36841 | 0.6354  | 0.30702 | 0.50488 | 0.30701 | 0.88214 | 0.30702 | 1.17695 |
| 0.36852 | 0.63567 | 0.30711 | 0.50543 | 0.30711 | 0.88233 | 0.30711 | 1.17787 |
| 0.36863 | 0.63604 | 0.30721 | 0.50533 | 0.3072  | 0.88269 | 0.3072  | 1.17787 |
| 0.36875 | 0.6364  | 0.3073  | 0.50569 | 0.30729 | 0.88306 | 0.30729 | 1.17823 |
| 0.36885 | 0.63658 | 0.30739 | 0.50606 | 0.30738 | 0.88315 | 0.30738 | 1.17868 |
| 0.36897 | 0.63668 | 0.30748 | 0.50643 | 0.30748 | 0.88351 | 0.30748 | 1.17886 |
| 0.36908 | 0.63704 | 0.30758 | 0.50716 | 0.30757 | 0.88379 | 0.30757 | 1.17932 |
| 0.36919 | 0.63722 | 0.30766 | 0.50752 | 0.30766 | 0.88415 | 0.30766 | 1.17987 |
| 0.3693  | 0.63731 | 0.30776 | 0.50788 | 0.30775 | 0.88487 | 0.30775 | 1.17977 |
| 0.36941 | 0.63776 | 0.30786 | 0.50806 | 0.30785 | 0.88506 | 0.30785 | 1.18023 |
| 0.36953 | 0.63813 | 0.30794 | 0.50861 | 0.30794 | 0.88543 | 0.30794 | 1.18132 |
| 0.36963 | 0.63849 | 0.30804 | 0.50906 | 0.30803 | 0.88552 | 0.30803 | 1.18205 |
| 0.36975 | 0.63859 | 0.30813 | 0.50934 | 0.30812 | 0.88579 | 0.30813 | 1.18233 |
| 0.36985 | 0.63876 | 0.30823 | 0.50952 | 0.30822 | 0.88606 | 0.30822 | 1.18305 |
| 0.36997 | 0.63922 | 0.30832 | 0.50961 | 0.30831 | 0.88652 | 0.30831 | 1.18342 |
| 0.37008 | 0.63949 | 0.30841 | 0.5098  | 0.3084  | 0.8867  | 0.3084  | 1.18423 |
| 0.37019 | 0.63967 | 0.3085  | 0.51034 | 0.30849 | 0.88706 | 0.3085  | 1.18487 |
| 0.3703  | 0.63995 | 0.30859 | 0.5107  | 0.30859 | 0.88706 | 0.30859 | 1.18524 |
| 0.37041 | 0.64004 | 0.30869 | 0.51089 | 0.30868 | 0.88751 | 0.30868 | 1.18569 |
| 0.37052 | 0.6404  | 0.30878 | 0.51098 | 0.30877 | 0.88788 | 0.30878 | 1.18605 |
| 0.37063 | 0.64059 | 0.30887 | 0.51143 | 0.30886 | 0.88833 | 0.30886 | 1.18678 |
| 0.37075 | 0.64077 | 0.30896 | 0.51189 | 0.30895 | 0.88861 | 0.30896 | 1.18751 |
| 0.37086 | 0.64095 | 0.30906 | 0.51189 | 0.30905 | 0.88888 | 0.30905 | 1.18733 |
| 0.37097 | 0.64122 | 0.30915 | 0.51225 | 0.30915 | 0.88915 | 0.30915 | 1.1877  |
| 0.37108 | 0.64159 | 0.30924 | 0.51307 | 0.30923 | 0.88952 | 0.30923 | 1.18833 |
| 0.37119 | 0.64167 | 0.30934 | 0.51343 | 0.30933 | 0.88988 | 0.30933 | 1.18852 |
| 0.3713  | 0.64195 | 0.30942 | 0.5138  | 0.30942 | 0.88988 | 0.30942 | 1.18897 |
| 0.37142 | 0.64232 | 0.30952 | 0.51398 | 0.30951 | 0.89016 | 0.30951 | 1.18979 |
| 0.37152 | 0.64277 | 0.30962 | 0.51434 | 0.3096  | 0.89052 | 0.30961 | 1.19024 |
| 0.37164 | 0.64295 | 0.3097  | 0.51452 | 0.3097  | 0.89106 | 0.3097  | 1.19034 |
| 0.37174 | 0.64314 | 0.3098  | 0.51507 | 0.30979 | 0.89143 | 0.30979 | 1.19088 |
| 0.37186 | 0.64359 | 0.30989 | 0.51552 | 0.30988 | 0.89197 | 0.30988 | 1.1917  |
| 0.37196 | 0.64368 | 0.30998 | 0.51571 | 0.30998 | 0.89234 | 0.30998 | 1.19188 |
| 0.37208 | 0.64341 | 0.31008 | 0.51617 | 0.31007 | 0.89234 | 0.31007 | 1.19261 |
| 0.37219 | 0.64359 | 0.31017 | 0.51625 | 0.31016 | 0.89261 | 0.31016 | 1.19343 |
| 0.3723  | 0.64386 | 0.31026 | 0.51671 | 0.31025 | 0.89316 | 0.31026 | 1.19343 |
| 0.37241 | 0.64432 | 0.31035 | 0.51689 | 0.31034 | 0.89371 | 0.31034 | 1.19415 |

|         |         |         |         |         |         |         |         |
|---------|---------|---------|---------|---------|---------|---------|---------|
| 0.37252 | 0.64459 | 0.31045 | 0.51735 | 0.31044 | 0.89362 | 0.31044 | 1.1948  |
| 0.37264 | 0.64513 | 0.31054 | 0.5178  | 0.31053 | 0.89362 | 0.31053 | 1.1948  |
| 0.37274 | 0.64532 | 0.31063 | 0.51798 | 0.31062 | 0.89416 | 0.31062 | 1.19489 |
| 0.37286 | 0.64569 | 0.31073 | 0.51844 | 0.31071 | 0.8947  | 0.31072 | 1.19525 |
| 0.37297 | 0.64569 | 0.31082 | 0.5188  | 0.31081 | 0.89489 | 0.31081 | 1.1957  |
| 0.37308 | 0.64596 | 0.31091 | 0.51898 | 0.3109  | 0.89507 | 0.31091 | 1.19607 |
| 0.37319 | 0.64614 | 0.311   | 0.51953 | 0.31099 | 0.89516 | 0.31099 | 1.1967  |
| 0.3733  | 0.64641 | 0.31109 | 0.5199  | 0.31109 | 0.89543 | 0.31109 | 1.19725 |
| 0.37341 | 0.64669 | 0.31119 | 0.52008 | 0.31118 | 0.89598 | 0.31118 | 1.19743 |
| 0.37353 | 0.64723 | 0.31128 | 0.52044 | 0.31127 | 0.89644 | 0.31127 | 1.19825 |
| 0.37363 | 0.64732 | 0.31137 | 0.52071 | 0.31136 | 0.89717 | 0.31137 | 1.19834 |
| 0.37375 | 0.64741 | 0.31146 | 0.52108 | 0.31146 | 0.89717 | 0.31146 | 1.19889 |
| 0.37385 | 0.64796 | 0.31156 | 0.52135 | 0.31155 | 0.89726 | 0.31155 | 1.19971 |
| 0.37397 | 0.64805 | 0.31165 | 0.52171 | 0.31164 | 0.89762 | 0.31164 | 1.20017 |
| 0.37408 | 0.64814 | 0.31174 | 0.52208 | 0.31174 | 0.89825 | 0.31174 | 1.20098 |
| 0.37419 | 0.64868 | 0.31184 | 0.52245 | 0.31183 | 0.89853 | 0.31183 | 1.20125 |
| 0.3743  | 0.64933 | 0.31193 | 0.5229  | 0.31192 | 0.89853 | 0.31192 | 1.20144 |
| 0.37441 | 0.64915 | 0.31202 | 0.52299 | 0.31201 | 0.89862 | 0.31202 | 1.2018  |
| 0.37453 | 0.64941 | 0.31211 | 0.52344 | 0.31211 | 0.89898 | 0.31211 | 1.20217 |
| 0.37463 | 0.64978 | 0.31221 | 0.5239  | 0.3122  | 0.89917 | 0.3122  | 1.2028  |
| 0.37475 | 0.65014 | 0.3123  | 0.52454 | 0.31229 | 0.89953 | 0.31229 | 1.20335 |
| 0.37485 | 0.65023 | 0.31239 | 0.52472 | 0.31238 | 0.90007 | 0.31238 | 1.20389 |
| 0.37497 | 0.65033 | 0.31249 | 0.52508 | 0.31247 | 0.90017 | 0.31248 | 1.20398 |
| 0.37508 | 0.6506  | 0.31258 | 0.52544 | 0.31257 | 0.90044 | 0.31257 | 1.20463 |
| 0.37519 | 0.65105 | 0.31267 | 0.52581 | 0.31266 | 0.9008  | 0.31266 | 1.2049  |
| 0.3753  | 0.65115 | 0.31276 | 0.52609 | 0.31275 | 0.90099 | 0.31275 | 1.20545 |
| 0.37541 | 0.65123 | 0.31286 | 0.52672 | 0.31285 | 0.90117 | 0.31285 | 1.20626 |
| 0.37552 | 0.6516  | 0.31294 | 0.52727 | 0.31294 | 0.9018  | 0.31294 | 1.20644 |
| 0.37563 | 0.65196 | 0.31304 | 0.52745 | 0.31303 | 0.90199 | 0.31303 | 1.20671 |
| 0.37575 | 0.65206 | 0.31313 | 0.52763 | 0.31312 | 0.90199 | 0.31313 | 1.20835 |
| 0.37586 | 0.65224 | 0.31322 | 0.52799 | 0.31322 | 0.90235 | 0.31322 | 1.20872 |
| 0.37597 | 0.65251 | 0.31332 | 0.52836 | 0.31331 | 0.9028  | 0.31331 | 1.20863 |
| 0.37608 | 0.6526  | 0.31341 | 0.52864 | 0.3134  | 0.90308 | 0.3134  | 1.20863 |
| 0.37619 | 0.65297 | 0.3135  | 0.52882 | 0.3135  | 0.90345 | 0.3135  | 1.20935 |
| 0.3763  | 0.65315 | 0.3136  | 0.52936 | 0.31359 | 0.90345 | 0.31359 | 1.20963 |
| 0.37641 | 0.65333 | 0.31369 | 0.52936 | 0.31368 | 0.90372 | 0.31368 | 1.20981 |
| 0.37652 | 0.65387 | 0.31378 | 0.52982 | 0.31377 | 0.90444 | 0.31378 | 1.21045 |
| 0.37664 | 0.65405 | 0.31387 | 0.53009 | 0.31387 | 0.90453 | 0.31386 | 1.21027 |
| 0.37674 | 0.65424 | 0.31397 | 0.53063 | 0.31396 | 0.90481 | 0.31396 | 1.21091 |
| 0.37686 | 0.65451 | 0.31405 | 0.531   | 0.31405 | 0.90526 | 0.31405 | 1.21163 |
| 0.37696 | 0.6546  | 0.31415 | 0.53154 | 0.31414 | 0.90554 | 0.31414 | 1.21181 |
| 0.37708 | 0.65497 | 0.31425 | 0.53191 | 0.31423 | 0.90554 | 0.31424 | 1.21181 |
| 0.37719 | 0.65533 | 0.31434 | 0.53191 | 0.31433 | 0.90609 | 0.31433 | 1.21263 |
| 0.3773  | 0.65542 | 0.31443 | 0.53237 | 0.31442 | 0.90663 | 0.31442 | 1.21318 |
| 0.37741 | 0.65561 | 0.31452 | 0.53291 | 0.31451 | 0.9069  | 0.31451 | 1.21399 |
| 0.37752 | 0.65597 | 0.31461 | 0.5331  | 0.31461 | 0.90681 | 0.31461 | 1.21482 |
| 0.37764 | 0.65633 | 0.3147  | 0.53346 | 0.3147  | 0.90727 | 0.3147  | 1.21464 |
| 0.37774 | 0.6567  | 0.3148  | 0.53373 | 0.31479 | 0.90763 | 0.31479 | 1.21518 |
| 0.37786 | 0.6567  | 0.31489 | 0.53427 | 0.31488 | 0.9079  | 0.31489 | 1.21591 |
| 0.37797 | 0.65706 | 0.31498 | 0.53464 | 0.31497 | 0.90863 | 0.31497 | 1.21636 |
| 0.37808 | 0.6576  | 0.31508 | 0.5351  | 0.31507 | 0.90863 | 0.31507 | 1.217   |
| 0.37819 | 0.65751 | 0.31517 | 0.53528 | 0.31516 | 0.90891 | 0.31516 | 1.21718 |
| 0.3783  | 0.6576  | 0.31526 | 0.53555 | 0.31526 | 0.90945 | 0.31526 | 1.2171  |
| 0.37841 | 0.65797 | 0.31536 | 0.53574 | 0.31534 | 0.90973 | 0.31535 | 1.21782 |

|         |         |         |         |         |         |         |         |
|---------|---------|---------|---------|---------|---------|---------|---------|
| 0.37852 | 0.65806 | 0.31545 | 0.53619 | 0.31544 | 0.91    | 0.31544 | 1.21864 |
| 0.37863 | 0.65824 | 0.31554 | 0.53692 | 0.31553 | 0.91045 | 0.31554 | 1.21864 |
| 0.37875 | 0.6587  | 0.31563 | 0.53701 | 0.31562 | 0.91063 | 0.31562 | 1.21918 |
| 0.37885 | 0.65897 | 0.31573 | 0.53728 | 0.31572 | 0.91063 | 0.31572 | 1.21964 |
| 0.37897 | 0.65925 | 0.31582 | 0.53764 | 0.31581 | 0.91109 | 0.31581 | 1.22055 |
| 0.37908 | 0.65916 | 0.31591 | 0.53819 | 0.3159  | 0.91154 | 0.3159  | 1.22091 |
| 0.37919 | 0.65952 | 0.316   | 0.53828 | 0.31599 | 0.91172 | 0.316   | 1.22174 |
| 0.3793  | 0.6597  | 0.31609 | 0.53865 | 0.31609 | 0.91227 | 0.31609 | 1.22219 |
| 0.37941 | 0.65979 | 0.31619 | 0.53937 | 0.31618 | 0.91246 | 0.31618 | 1.22219 |
| 0.37953 | 0.66015 | 0.31628 | 0.53974 | 0.31627 | 0.91282 | 0.31627 | 1.22273 |
| 0.37963 | 0.66052 | 0.31637 | 0.5401  | 0.31637 | 0.91336 | 0.31637 | 1.22346 |
| 0.37975 | 0.66088 | 0.31646 | 0.54037 | 0.31646 | 0.91355 | 0.31646 | 1.22346 |
| 0.37985 | 0.66107 | 0.31656 | 0.54083 | 0.31655 | 0.91391 | 0.31655 | 1.22355 |
| 0.37997 | 0.66134 | 0.31665 | 0.54101 | 0.31664 | 0.91455 | 0.31665 | 1.22401 |
| 0.38008 | 0.66171 | 0.31674 | 0.54138 | 0.31673 | 0.91446 | 0.31673 | 1.22465 |
| 0.38019 | 0.66197 | 0.31684 | 0.54174 | 0.31683 | 0.91464 | 0.31683 | 1.2251  |
| 0.3803  | 0.66234 | 0.31693 | 0.54211 | 0.31692 | 0.91482 | 0.31692 | 1.22565 |
| 0.38041 | 0.66215 | 0.31702 | 0.54255 | 0.31701 | 0.91527 | 0.31701 | 1.22601 |
| 0.38052 | 0.66271 | 0.31712 | 0.54293 | 0.3171  | 0.91573 | 0.31711 | 1.22647 |
| 0.38063 | 0.66288 | 0.31721 | 0.54311 | 0.3172  | 0.91582 | 0.3172  | 1.2272  |
| 0.38075 | 0.66298 | 0.3173  | 0.54338 | 0.31729 | 0.91628 | 0.31729 | 1.22765 |
| 0.38086 | 0.66334 | 0.31739 | 0.54374 | 0.31738 | 0.91673 | 0.31738 | 1.22774 |
| 0.38097 | 0.66316 | 0.31749 | 0.54428 | 0.31748 | 0.91719 | 0.31748 | 1.22819 |
| 0.38108 | 0.66352 | 0.31757 | 0.54474 | 0.31757 | 0.9171  | 0.31757 | 1.22856 |
| 0.38119 | 0.66398 | 0.31767 | 0.54492 | 0.31766 | 0.918   | 0.31766 | 1.22901 |
| 0.3813  | 0.66452 | 0.31776 | 0.54529 | 0.31775 | 0.91828 | 0.31776 | 1.22929 |
| 0.38142 | 0.6648  | 0.31785 | 0.54592 | 0.31785 | 0.91856 | 0.31785 | 1.23001 |
| 0.38152 | 0.6647  | 0.31795 | 0.5462  | 0.31794 | 0.91882 | 0.31794 | 1.23029 |
| 0.38164 | 0.66489 | 0.31804 | 0.54629 | 0.31803 | 0.91901 | 0.31803 | 1.23075 |
| 0.38174 | 0.66489 | 0.31813 | 0.54684 | 0.31813 | 0.91928 | 0.31813 | 1.2312  |
| 0.38186 | 0.66535 | 0.31822 | 0.5472  | 0.31821 | 0.91964 | 0.31821 | 1.23175 |
| 0.38196 | 0.6658  | 0.31832 | 0.54747 | 0.31831 | 0.91964 | 0.31831 | 1.23193 |
| 0.38208 | 0.66598 | 0.31841 | 0.54756 | 0.3184  | 0.9201  | 0.31841 | 1.23257 |
| 0.38219 | 0.66644 | 0.3185  | 0.54811 | 0.3185  | 0.92046 | 0.3185  | 1.23284 |
| 0.3823  | 0.66662 | 0.3186  | 0.54884 | 0.31859 | 0.92065 | 0.31859 | 1.23329 |
| 0.38241 | 0.66689 | 0.31868 | 0.54902 | 0.31868 | 0.92083 | 0.31868 | 1.23402 |
| 0.38252 | 0.66707 | 0.31878 | 0.54939 | 0.31877 | 0.92138 | 0.31877 | 1.23439 |
| 0.38264 | 0.66707 | 0.31888 | 0.54975 | 0.31886 | 0.92138 | 0.31887 | 1.23475 |
| 0.38274 | 0.66725 | 0.31896 | 0.54984 | 0.31896 | 0.92183 | 0.31896 | 1.23503 |
| 0.38286 | 0.66753 | 0.31906 | 0.55029 | 0.31905 | 0.92237 | 0.31905 | 1.2353  |
| 0.38297 | 0.66798 | 0.31915 | 0.55066 | 0.31914 | 0.92237 | 0.31914 | 1.23593 |
| 0.38308 | 0.66853 | 0.31925 | 0.55102 | 0.31924 | 0.92283 | 0.31924 | 1.23611 |
| 0.38319 | 0.66871 | 0.31933 | 0.55148 | 0.31933 | 0.9232  | 0.31933 | 1.23675 |
| 0.3833  | 0.6688  | 0.31943 | 0.55184 | 0.31942 | 0.92338 | 0.31942 | 1.23757 |
| 0.38341 | 0.66926 | 0.31953 | 0.55221 | 0.31951 | 0.92347 | 0.31952 | 1.23812 |
| 0.38352 | 0.66917 | 0.31961 | 0.55285 | 0.31961 | 0.92374 | 0.31961 | 1.23857 |
| 0.38363 | 0.66934 | 0.31971 | 0.55303 | 0.3197  | 0.9242  | 0.3197  | 1.23902 |
| 0.38375 | 0.66944 | 0.3198  | 0.55339 | 0.31979 | 0.92465 | 0.31979 | 1.23958 |
| 0.38385 | 0.66962 | 0.31989 | 0.55375 | 0.31988 | 0.92501 | 0.31988 | 1.2403  |
| 0.38397 | 0.66989 | 0.31998 | 0.55412 | 0.31997 | 0.9251  | 0.31997 | 1.24057 |
| 0.38408 | 0.66998 | 0.32008 | 0.55439 | 0.32007 | 0.92583 | 0.32007 | 1.24103 |
| 0.38419 | 0.67044 | 0.32017 | 0.55503 | 0.32016 | 0.92583 | 0.32017 | 1.2413  |
| 0.3843  | 0.6708  | 0.32026 | 0.5553  | 0.32025 | 0.92602 | 0.32025 | 1.24158 |
| 0.38441 | 0.6708  | 0.32036 | 0.55548 | 0.32035 | 0.92665 | 0.32035 | 1.24231 |



|         |         |         |         |         |         |         |         |
|---------|---------|---------|---------|---------|---------|---------|---------|
| 0.38453 | 0.67098 | 0.32045 | 0.55612 | 0.32044 | 0.92684 | 0.32044 | 1.24249 |
| 0.38463 | 0.67135 | 0.32054 | 0.55648 | 0.32053 | 0.92711 | 0.32053 | 1.24276 |
| 0.38475 | 0.67144 | 0.32063 | 0.55676 | 0.32062 | 0.92739 | 0.32063 | 1.24349 |
| 0.38485 | 0.67181 | 0.32072 | 0.55712 | 0.32072 | 0.92774 | 0.32072 | 1.24376 |
| 0.38497 | 0.67199 | 0.32082 | 0.5574  | 0.32081 | 0.92774 | 0.32081 | 1.24376 |
| 0.38508 | 0.67217 | 0.32091 | 0.55785 | 0.3209  | 0.92829 | 0.3209  | 1.24422 |
| 0.38519 | 0.67217 | 0.32101 | 0.55812 | 0.321   | 0.92875 | 0.321   | 1.24504 |
| 0.3853  | 0.67254 | 0.32109 | 0.55876 | 0.32109 | 0.92902 | 0.32109 | 1.24568 |
| 0.38541 | 0.67254 | 0.32119 | 0.55931 | 0.32118 | 0.9292  | 0.32118 | 1.24603 |
| 0.38552 | 0.67308 | 0.32128 | 0.55958 | 0.32127 | 0.92957 | 0.32128 | 1.2464  |
| 0.38563 | 0.67344 | 0.32137 | 0.56021 | 0.32136 | 0.92966 | 0.32136 | 1.24695 |
| 0.38575 | 0.67326 | 0.32147 | 0.56067 | 0.32146 | 0.93029 | 0.32146 | 1.2474  |
| 0.38586 | 0.67381 | 0.32156 | 0.56085 | 0.32155 | 0.93084 | 0.32155 | 1.24786 |
| 0.38597 | 0.67417 | 0.32165 | 0.5614  | 0.32164 | 0.93112 | 0.32164 | 1.24831 |
| 0.38608 | 0.67444 | 0.32174 | 0.56176 | 0.32173 | 0.93166 | 0.32173 | 1.24895 |
| 0.38619 | 0.67454 | 0.32184 | 0.56222 | 0.32183 | 0.93175 | 0.32183 | 1.24895 |
| 0.3863  | 0.67481 | 0.32193 | 0.56258 | 0.32192 | 0.93184 | 0.32193 | 1.24922 |
| 0.38642 | 0.67517 | 0.32202 | 0.56313 | 0.32201 | 0.93221 | 0.32201 | 1.25004 |
| 0.38652 | 0.67545 | 0.32212 | 0.5634  | 0.3221  | 0.93257 | 0.32211 | 1.25068 |
| 0.38664 | 0.67563 | 0.32221 | 0.56367 | 0.3222  | 0.93275 | 0.3222  | 1.25104 |
| 0.38674 | 0.6759  | 0.3223  | 0.56413 | 0.32229 | 0.93348 | 0.32229 | 1.25214 |
| 0.38686 | 0.67617 | 0.32239 | 0.56486 | 0.32238 | 0.93348 | 0.32238 | 1.25231 |
| 0.38696 | 0.67627 | 0.32248 | 0.56522 | 0.32248 | 0.93321 | 0.32248 | 1.25259 |
| 0.38708 | 0.67645 | 0.32257 | 0.56568 | 0.32256 | 0.93402 | 0.32257 | 1.25286 |
| 0.38719 | 0.67708 | 0.32267 | 0.56613 | 0.32266 | 0.93476 | 0.32266 | 1.25313 |
| 0.3873  | 0.67699 | 0.32276 | 0.56631 | 0.32276 | 0.93467 | 0.32276 | 1.25378 |
| 0.38741 | 0.67708 | 0.32285 | 0.56686 | 0.32285 | 0.93458 | 0.32285 | 1.25477 |
| 0.38752 | 0.67726 | 0.32295 | 0.5674  | 0.32294 | 0.93493 | 0.32294 | 1.2555  |
| 0.38764 | 0.67735 | 0.32304 | 0.56786 | 0.32303 | 0.93549 | 0.32303 | 1.25568 |
| 0.38775 | 0.67763 | 0.32313 | 0.56814 | 0.32313 | 0.93585 | 0.32313 | 1.25623 |
| 0.38786 | 0.67836 | 0.32323 | 0.56841 | 0.32321 | 0.93612 | 0.32322 | 1.25705 |
| 0.38797 | 0.67863 | 0.32332 | 0.56887 | 0.32331 | 0.93621 | 0.32331 | 1.25705 |
| 0.38808 | 0.67854 | 0.32341 | 0.56913 | 0.3234  | 0.93667 | 0.3234  | 1.25805 |
| 0.38819 | 0.67882 | 0.3235  | 0.5695  | 0.32349 | 0.93694 | 0.32349 | 1.25769 |
| 0.3883  | 0.67908 | 0.3236  | 0.56995 | 0.32359 | 0.93712 | 0.32359 | 1.25805 |
| 0.38841 | 0.67918 | 0.32368 | 0.5705  | 0.32368 | 0.9373  | 0.32368 | 1.25859 |
| 0.38852 | 0.67945 | 0.32378 | 0.57095 | 0.32377 | 0.93776 | 0.32377 | 1.25896 |
| 0.38863 | 0.67963 | 0.32387 | 0.57123 | 0.32386 | 0.93822 | 0.32387 | 1.2596  |
| 0.38875 | 0.6799  | 0.32396 | 0.57186 | 0.32396 | 0.9383  | 0.32396 | 1.26069 |
| 0.38885 | 0.68018 | 0.32406 | 0.57223 | 0.32405 | 0.93876 | 0.32405 | 1.26087 |
| 0.38897 | 0.68082 | 0.32415 | 0.5725  | 0.32414 | 0.93894 | 0.32414 | 1.26114 |
| 0.38908 | 0.68109 | 0.32424 | 0.57305 | 0.32424 | 0.93931 | 0.32424 | 1.26133 |
| 0.38919 | 0.68118 | 0.32434 | 0.5735  | 0.32432 | 0.93994 | 0.32433 | 1.2616  |
| 0.3893  | 0.68145 | 0.32443 | 0.57378 | 0.32442 | 0.94003 | 0.32442 | 1.26205 |
| 0.38941 | 0.68155 | 0.32452 | 0.57423 | 0.32452 | 0.94013 | 0.32452 | 1.26287 |
| 0.38953 | 0.68163 | 0.32461 | 0.57469 | 0.32461 | 0.94085 | 0.32461 | 1.26296 |
| 0.38963 | 0.68209 | 0.32471 | 0.57496 | 0.3247  | 0.94095 | 0.3247  | 1.2636  |
| 0.38975 | 0.682   | 0.3248  | 0.57533 | 0.32479 | 0.94131 | 0.3248  | 1.26433 |
| 0.38985 | 0.68255 | 0.32489 | 0.57542 | 0.32488 | 0.94176 | 0.32488 | 1.2647  |
| 0.38997 | 0.68264 | 0.32499 | 0.57569 | 0.32497 | 0.94213 | 0.32498 | 1.2647  |
| 0.39008 | 0.68282 | 0.32508 | 0.57651 | 0.32507 | 0.94249 | 0.32507 | 1.26542 |
| 0.39019 | 0.68318 | 0.32517 | 0.57696 | 0.32516 | 0.94276 | 0.32516 | 1.26597 |
| 0.3903  | 0.68337 | 0.32526 | 0.57733 | 0.32525 | 0.94276 | 0.32525 | 1.26606 |
| 0.39041 | 0.68363 | 0.32535 | 0.57778 | 0.32535 | 0.94304 | 0.32535 | 1.26643 |

|         |         |         |         |         |         |         |         |
|---------|---------|---------|---------|---------|---------|---------|---------|
| 0.39052 | 0.68428 | 0.32545 | 0.57814 | 0.32544 | 0.94376 | 0.32544 | 1.26679 |
| 0.39063 | 0.68464 | 0.32554 | 0.57869 | 0.32553 | 0.94376 | 0.32553 | 1.26706 |
| 0.39075 | 0.68482 | 0.32563 | 0.57897 | 0.32562 | 0.94394 | 0.32563 | 1.2677  |
| 0.39086 | 0.68536 | 0.32572 | 0.57942 | 0.32572 | 0.9445  | 0.32572 | 1.26842 |
| 0.39097 | 0.68519 | 0.32582 | 0.57996 | 0.32581 | 0.94495 | 0.32581 | 1.26879 |
| 0.39108 | 0.68536 | 0.32591 | 0.58033 | 0.3259  | 0.94559 | 0.3259  | 1.26934 |
| 0.39119 | 0.68573 | 0.326   | 0.58097 | 0.326   | 0.94577 | 0.32599 | 1.2697  |
| 0.3913  | 0.68591 | 0.32609 | 0.58133 | 0.32609 | 0.94604 | 0.32609 | 1.26988 |
| 0.39142 | 0.686   | 0.32619 | 0.58188 | 0.32618 | 0.94631 | 0.32618 | 1.27043 |
| 0.39152 | 0.68637 | 0.32628 | 0.58224 | 0.32627 | 0.94686 | 0.32627 | 1.27134 |
| 0.39164 | 0.68691 | 0.32637 | 0.58242 | 0.32636 | 0.94714 | 0.32636 | 1.2718  |
| 0.39174 | 0.68709 | 0.32647 | 0.58288 | 0.32646 | 0.94714 | 0.32646 | 1.27198 |
| 0.39186 | 0.68728 | 0.32655 | 0.58379 | 0.32655 | 0.94723 | 0.32655 | 1.27216 |
| 0.39196 | 0.68765 | 0.32665 | 0.58407 | 0.32664 | 0.9474  | 0.32664 | 1.27243 |
| 0.39208 | 0.68828 | 0.32675 | 0.58416 | 0.32673 | 0.94805 | 0.32674 | 1.27289 |
| 0.39219 | 0.68837 | 0.32684 | 0.58479 | 0.32683 | 0.94841 | 0.32683 | 1.27362 |
| 0.3923  | 0.68855 | 0.32693 | 0.58533 | 0.32692 | 0.94841 | 0.32692 | 1.27362 |
| 0.39241 | 0.68874 | 0.32702 | 0.58579 | 0.32701 | 0.94877 | 0.32701 | 1.27416 |
| 0.39252 | 0.68883 | 0.32711 | 0.58597 | 0.32711 | 0.94922 | 0.32711 | 1.27498 |
| 0.39264 | 0.68928 | 0.32721 | 0.58652 | 0.3272  | 0.94914 | 0.3272  | 1.27534 |
| 0.39274 | 0.68937 | 0.3273  | 0.58707 | 0.32729 | 0.94959 | 0.32729 | 1.27571 |
| 0.39286 | 0.68964 | 0.32739 | 0.58743 | 0.32738 | 0.94996 | 0.32739 | 1.27635 |
| 0.39297 | 0.69001 | 0.32748 | 0.5878  | 0.32747 | 0.94996 | 0.32747 | 1.27707 |
| 0.39308 | 0.69046 | 0.32758 | 0.58825 | 0.32757 | 0.9505  | 0.32757 | 1.27771 |
| 0.39319 | 0.69092 | 0.32767 | 0.58862 | 0.32766 | 0.95069 | 0.32766 | 1.27807 |
| 0.3933  | 0.69101 | 0.32776 | 0.58907 | 0.32776 | 0.95095 | 0.32776 | 1.27834 |
| 0.39341 | 0.69101 | 0.32786 | 0.58943 | 0.32784 | 0.9515  | 0.32785 | 1.27899 |
| 0.39352 | 0.69138 | 0.32795 | 0.5897  | 0.32794 | 0.95178 | 0.32794 | 1.27953 |
| 0.39363 | 0.69165 | 0.32804 | 0.59016 | 0.32803 | 0.95205 | 0.32803 | 1.28007 |
| 0.39375 | 0.69183 | 0.32813 | 0.5907  | 0.32812 | 0.95269 | 0.32812 | 1.28035 |
| 0.39385 | 0.69247 | 0.32823 | 0.59144 | 0.32822 | 0.95305 | 0.32822 | 1.28044 |
| 0.39397 | 0.69256 | 0.32831 | 0.5918  | 0.32831 | 0.95332 | 0.32831 | 1.28108 |
| 0.39408 | 0.69247 | 0.32841 | 0.59225 | 0.3284  | 0.95396 | 0.3284  | 1.2819  |
| 0.39419 | 0.69274 | 0.32851 | 0.59262 | 0.32849 | 0.95414 | 0.3285  | 1.2819  |
| 0.3943  | 0.69292 | 0.3286  | 0.59289 | 0.32859 | 0.95414 | 0.32859 | 1.2828  |
| 0.39441 | 0.6931  | 0.32869 | 0.59362 | 0.32868 | 0.95478 | 0.32868 | 1.28517 |
| 0.39453 | 0.69393 | 0.32878 | 0.59408 | 0.32877 | 0.95514 | 0.32877 | 1.28626 |
| 0.39463 | 0.69401 | 0.32887 | 0.59408 | 0.32887 | 0.95524 | 0.32887 | 1.28654 |
| 0.39475 | 0.69429 | 0.32896 | 0.5949  | 0.32895 | 0.9555  | 0.32896 | 1.28736 |
| 0.39485 | 0.69437 | 0.32906 | 0.59517 | 0.32905 | 0.9556  | 0.32905 | 1.28782 |
| 0.39497 | 0.69465 | 0.32915 | 0.59544 | 0.32914 | 0.95605 | 0.32915 | 1.28808 |
| 0.39508 | 0.69474 | 0.32924 | 0.59598 | 0.32923 | 0.95632 | 0.32923 | 1.28873 |
| 0.39519 | 0.6951  | 0.32934 | 0.59681 | 0.32933 | 0.95678 | 0.32933 | 1.28918 |
| 0.3953  | 0.69528 | 0.32943 | 0.59707 | 0.32942 | 0.95678 | 0.32942 | 1.28954 |
| 0.39541 | 0.69528 | 0.32952 | 0.59726 | 0.32952 | 0.95705 | 0.32952 | 1.29009 |
| 0.39552 | 0.69574 | 0.32961 | 0.59799 | 0.3296  | 0.95751 | 0.32961 | 1.2899  |
| 0.39564 | 0.69602 | 0.32971 | 0.59872 | 0.3297  | 0.9576  | 0.3297  | 1.29045 |
| 0.39575 | 0.69602 | 0.3298  | 0.59881 | 0.32979 | 0.95806 | 0.3298  | 1.29136 |
| 0.39586 | 0.69647 | 0.32989 | 0.59908 | 0.32988 | 0.95869 | 0.32988 | 1.29209 |
| 0.39597 | 0.69666 | 0.32998 | 0.59917 | 0.32998 | 0.95897 | 0.32998 | 1.29282 |
| 0.39608 | 0.69702 | 0.33007 | 0.59971 | 0.33007 | 0.95942 | 0.33007 | 1.29318 |
| 0.39619 | 0.69738 | 0.33017 | 0.60044 | 0.33016 | 0.95951 | 0.33016 | 1.29382 |
| 0.3963  | 0.69738 | 0.33027 | 0.60081 | 0.33025 | 0.9597  | 0.33026 | 1.29445 |
| 0.39641 | 0.69765 | 0.33035 | 0.60127 | 0.33035 | 0.95987 | 0.33035 | 1.29464 |

|         |         |         |         |         |         |         |         |
|---------|---------|---------|---------|---------|---------|---------|---------|
| 0.39652 | 0.69811 | 0.33045 | 0.60145 | 0.33044 | 0.96033 | 0.33044 | 1.29455 |
| 0.39664 | 0.69839 | 0.33054 | 0.6019  | 0.33053 | 0.96069 | 0.33053 | 1.295   |
| 0.39674 | 0.69875 | 0.33063 | 0.60227 | 0.33063 | 0.96088 | 0.33063 | 1.29637 |
| 0.39686 | 0.69902 | 0.33072 | 0.60254 | 0.33072 | 0.96161 | 0.33072 | 1.29701 |
| 0.39696 | 0.69929 | 0.33082 | 0.60291 | 0.33081 | 0.96178 | 0.33081 | 1.29682 |
| 0.39708 | 0.69939 | 0.33091 | 0.60354 | 0.3309  | 0.96188 | 0.3309  | 1.29746 |
| 0.39719 | 0.69965 | 0.331   | 0.6039  | 0.33099 | 0.96206 | 0.33099 | 1.29791 |
| 0.3973  | 0.69984 | 0.3311  | 0.60436 | 0.33109 | 0.9626  | 0.33109 | 1.29828 |
| 0.39741 | 0.70011 | 0.33119 | 0.60491 | 0.33118 | 0.96306 | 0.33118 | 1.2991  |
| 0.39752 | 0.70047 | 0.33128 | 0.60545 | 0.33128 | 0.96306 | 0.33127 | 1.29773 |
| 0.39764 | 0.70084 | 0.33137 | 0.606   | 0.33136 | 0.96325 | 0.33137 | 1.29628 |
| 0.39774 | 0.70093 | 0.33147 | 0.60645 | 0.33146 | 0.96342 | 0.33146 | 1.2971  |
| 0.39786 | 0.70111 | 0.33156 | 0.60655 | 0.33155 | 0.96415 | 0.33155 | 1.29737 |
| 0.39797 | 0.7013  | 0.33165 | 0.60718 | 0.33164 | 0.96407 | 0.33164 | 1.29746 |
| 0.39808 | 0.70166 | 0.33174 | 0.60755 | 0.33174 | 0.9647  | 0.33174 | 1.29801 |
| 0.39819 | 0.70202 | 0.33183 | 0.60818 | 0.33183 | 0.96507 | 0.33183 | 1.2981  |
| 0.3983  | 0.70239 | 0.33193 | 0.60836 | 0.33192 | 0.96552 | 0.33192 | 1.29874 |
| 0.39841 | 0.70248 | 0.33202 | 0.60864 | 0.33201 | 0.96552 | 0.33202 | 1.29937 |
| 0.39852 | 0.70257 | 0.33211 | 0.609   | 0.33211 | 0.96598 | 0.33211 | 1.29992 |
| 0.39863 | 0.70284 | 0.33221 | 0.60964 | 0.3322  | 0.96615 | 0.3322  | 1.30001 |
| 0.39875 | 0.70311 | 0.3323  | 0.6101  | 0.33229 | 0.96661 | 0.33229 | 1.30074 |
| 0.39885 | 0.70339 | 0.33239 | 0.61055 | 0.33239 | 0.96707 | 0.33239 | 1.3012  |
| 0.39897 | 0.70366 | 0.33248 | 0.61119 | 0.33248 | 0.96716 | 0.33248 | 1.30138 |
| 0.39908 | 0.70385 | 0.33258 | 0.61155 | 0.33257 | 0.9678  | 0.33257 | 1.30183 |
| 0.39919 | 0.7043  | 0.33267 | 0.61182 | 0.33266 | 0.96816 | 0.33266 | 1.30192 |
| 0.3993  | 0.70476 | 0.33276 | 0.61219 | 0.33275 | 0.96843 | 0.33275 | 1.30237 |
| 0.39941 | 0.70476 | 0.33286 | 0.61237 | 0.33285 | 0.96871 | 0.33285 | 1.3031  |
| 0.39953 | 0.70521 | 0.33295 | 0.61291 | 0.33294 | 0.96898 | 0.33294 | 1.30356 |
| 0.39963 | 0.70548 | 0.33304 | 0.61365 | 0.33303 | 0.96925 | 0.33303 | 1.30392 |
| 0.39975 | 0.70566 | 0.33313 | 0.6141  | 0.33312 | 0.96961 | 0.33312 | 1.30474 |
| 0.39985 | 0.70594 | 0.33322 | 0.61428 | 0.33322 | 0.96989 | 0.33322 | 1.30529 |
| 0.39997 | 0.70603 | 0.33332 | 0.61465 | 0.33331 | 0.96989 | 0.33331 | 1.3062  |
| 0.40008 | 0.70594 | 0.33341 | 0.61501 | 0.3334  | 0.97016 | 0.3334  | 1.30675 |
| 0.40019 | 0.70639 | 0.33351 | 0.61555 | 0.3335  | 0.97062 | 0.3335  | 1.30702 |
| 0.4003  | 0.70658 | 0.33359 | 0.61601 | 0.33359 | 0.97125 | 0.33358 | 1.30702 |
| 0.40041 | 0.70676 | 0.33369 | 0.61646 | 0.33368 | 0.97152 | 0.33368 | 1.30747 |
| 0.40052 | 0.70703 | 0.33378 | 0.61692 | 0.33377 | 0.97189 | 0.33378 | 1.30802 |
| 0.40063 | 0.70758 | 0.33387 | 0.61729 | 0.33387 | 0.97253 | 0.33387 | 1.3083  |
| 0.40075 | 0.70784 | 0.33397 | 0.61792 | 0.33396 | 0.97289 | 0.33396 | 1.30893 |
| 0.40086 | 0.70803 | 0.33406 | 0.61838 | 0.33405 | 0.97298 | 0.33405 | 1.31047 |
| 0.40097 | 0.7084  | 0.33415 | 0.61892 | 0.33414 | 0.97316 | 0.33414 | 1.30947 |
| 0.40108 | 0.70849 | 0.33424 | 0.61956 | 0.33423 | 0.97353 | 0.33424 | 1.30966 |
| 0.40119 | 0.70858 | 0.33434 | 0.61974 | 0.33433 | 0.97389 | 0.33433 | 1.31029 |
| 0.4013  | 0.70894 | 0.33443 | 0.6201  | 0.33442 | 0.97434 | 0.33443 | 1.31148 |
| 0.40142 | 0.7093  | 0.33452 | 0.62047 | 0.33451 | 0.97471 | 0.33451 | 1.31521 |
| 0.40152 | 0.70967 | 0.33462 | 0.62111 | 0.3346  | 0.97499 | 0.33461 | 1.3163  |
| 0.40164 | 0.70967 | 0.3347  | 0.62156 | 0.3347  | 0.97499 | 0.3347  | 1.31685 |
| 0.40174 | 0.71003 | 0.3348  | 0.62211 | 0.33479 | 0.97544 | 0.33479 | 1.3173  |
| 0.40186 | 0.71031 | 0.33489 | 0.62257 | 0.33488 | 0.9758  | 0.33489 | 1.31785 |
| 0.40197 | 0.71048 | 0.33498 | 0.62292 | 0.33498 | 0.97598 | 0.33498 | 1.31766 |
| 0.40208 | 0.71076 | 0.33508 | 0.62339 | 0.33507 | 0.97598 | 0.33507 | 1.31813 |
| 0.40219 | 0.71104 | 0.33517 | 0.62393 | 0.33516 | 0.9769  | 0.33516 | 1.3183  |
| 0.4023  | 0.71158 | 0.33526 | 0.62438 | 0.33525 | 0.97754 | 0.33526 | 1.31876 |
| 0.40241 | 0.71176 | 0.33535 | 0.62466 | 0.33535 | 0.97754 | 0.33535 | 1.31976 |

|         |         |         |         |         |         |         |         |
|---------|---------|---------|---------|---------|---------|---------|---------|
| 0.40252 | 0.71185 | 0.33545 | 0.6252  | 0.33544 | 0.97763 | 0.33544 | 1.32003 |
| 0.40264 | 0.71204 | 0.33554 | 0.62575 | 0.33553 | 0.97772 | 0.33554 | 1.3203  |
| 0.40274 | 0.71231 | 0.33563 | 0.62602 | 0.33563 | 0.9778  | 0.33563 | 1.32131 |
| 0.40286 | 0.71268 | 0.33573 | 0.62638 | 0.33571 | 0.97853 | 0.33572 | 1.32213 |
| 0.40297 | 0.71268 | 0.33582 | 0.62675 | 0.33581 | 0.97872 | 0.33581 | 1.32285 |
| 0.40308 | 0.71304 | 0.33591 | 0.62703 | 0.3359  | 0.9789  | 0.3359  | 1.32331 |
| 0.40319 | 0.71349 | 0.336   | 0.62748 | 0.33599 | 0.9789  | 0.33599 | 1.32331 |
| 0.4033  | 0.71385 | 0.3361  | 0.62821 | 0.33609 | 0.97908 | 0.33609 | 1.32404 |
| 0.40341 | 0.71377 | 0.33619 | 0.62866 | 0.33618 | 0.97981 | 0.33618 | 1.32522 |
| 0.40353 | 0.71404 | 0.33628 | 0.62903 | 0.33627 | 0.98017 | 0.33627 | 1.3255  |
| 0.40363 | 0.71431 | 0.33637 | 0.62921 | 0.33636 | 0.98053 | 0.33637 | 1.32586 |
| 0.40375 | 0.7144  | 0.33646 | 0.62994 | 0.33646 | 0.98045 | 0.33646 | 1.32622 |
| 0.40385 | 0.71468 | 0.33656 | 0.63039 | 0.33655 | 0.98099 | 0.33655 | 1.32668 |
| 0.40397 | 0.71486 | 0.33665 | 0.63085 | 0.33664 | 0.98145 | 0.33664 | 1.32659 |
| 0.40408 | 0.71504 | 0.33674 | 0.63121 | 0.33674 | 0.98154 | 0.33674 | 1.32723 |
| 0.40419 | 0.7154  | 0.33684 | 0.63175 | 0.33683 | 0.982   | 0.33683 | 1.32795 |
| 0.4043  | 0.71558 | 0.33693 | 0.63185 | 0.33692 | 0.98245 | 0.33692 | 1.3285  |
| 0.40441 | 0.71604 | 0.33702 | 0.6324  | 0.33701 | 0.98263 | 0.33702 | 1.32895 |
| 0.40453 | 0.71631 | 0.33711 | 0.63276 | 0.33711 | 0.98281 | 0.33711 | 1.32968 |
| 0.40463 | 0.71649 | 0.33721 | 0.63312 | 0.3372  | 0.9829  | 0.3372  | 1.33013 |
| 0.40475 | 0.71668 | 0.3373  | 0.63367 | 0.33729 | 0.98299 | 0.3373  | 1.3305  |
| 0.40485 | 0.71695 | 0.33739 | 0.63421 | 0.33739 | 0.98363 | 0.33739 | 1.33123 |
| 0.40497 | 0.7174  | 0.33749 | 0.63485 | 0.33747 | 0.98408 | 0.33748 | 1.33123 |
| 0.40508 | 0.7175  | 0.33757 | 0.63539 | 0.33757 | 0.98454 | 0.33757 | 1.33223 |
| 0.40519 | 0.71758 | 0.33767 | 0.63567 | 0.33766 | 0.98481 | 0.33766 | 1.33232 |
| 0.4053  | 0.71786 | 0.33776 | 0.63585 | 0.33775 | 0.98509 | 0.33775 | 1.33314 |
| 0.40541 | 0.71823 | 0.33785 | 0.63612 | 0.33785 | 0.98536 | 0.33785 | 1.33441 |
| 0.40552 | 0.7185  | 0.33794 | 0.63658 | 0.33794 | 0.98527 | 0.33794 | 1.3345  |
| 0.40564 | 0.71877 | 0.33804 | 0.63722 | 0.33803 | 0.98582 | 0.33803 | 1.3346  |
| 0.40575 | 0.71886 | 0.33814 | 0.63776 | 0.33812 | 0.98691 | 0.33813 | 1.33441 |
| 0.40586 | 0.71913 | 0.33822 | 0.63831 | 0.33822 | 0.98718 | 0.33822 | 1.3356  |
| 0.40597 | 0.71968 | 0.33832 | 0.63849 | 0.33831 | 0.98718 | 0.33831 | 1.33632 |
| 0.40608 | 0.71987 | 0.33841 | 0.63885 | 0.3384  | 0.98718 | 0.3384  | 1.3366  |
| 0.40619 | 0.72005 | 0.3385  | 0.63922 | 0.3385  | 0.98737 | 0.3385  | 1.33697 |
| 0.4063  | 0.72013 | 0.3386  | 0.63959 | 0.33859 | 0.98809 | 0.33859 | 1.3376  |
| 0.40642 | 0.72005 | 0.33869 | 0.64013 | 0.33868 | 0.98845 | 0.33868 | 1.33842 |
| 0.40652 | 0.7205  | 0.33878 | 0.6404  | 0.33877 | 0.98882 | 0.33878 | 1.33842 |
| 0.40664 | 0.72087 | 0.33887 | 0.64068 | 0.33887 | 0.98918 | 0.33886 | 1.33905 |
| 0.40674 | 0.72132 | 0.33897 | 0.64113 | 0.33896 | 0.98973 | 0.33896 | 1.33987 |
| 0.40686 | 0.7215  | 0.33905 | 0.64204 | 0.33905 | 0.99009 | 0.33905 | 1.34006 |
| 0.40696 | 0.72168 | 0.33915 | 0.64258 | 0.33914 | 0.99    | 0.33914 | 1.3407  |
| 0.40708 | 0.72159 | 0.33925 | 0.64304 | 0.33923 | 0.99009 | 0.33924 | 1.34142 |
| 0.40719 | 0.72205 | 0.33933 | 0.64359 | 0.33933 | 0.99046 | 0.33933 | 1.34161 |
| 0.4073  | 0.72241 | 0.33943 | 0.64368 | 0.33942 | 0.99101 | 0.33942 | 1.34197 |
| 0.40741 | 0.72268 | 0.33952 | 0.64423 | 0.33951 | 0.99136 | 0.33951 | 1.34242 |
| 0.40752 | 0.72295 | 0.33961 | 0.6445  | 0.33961 | 0.99191 | 0.33961 | 1.34151 |
| 0.40764 | 0.72332 | 0.3397  | 0.64522 | 0.3397  | 0.99218 | 0.3397  | 1.34242 |
| 0.40775 | 0.7236  | 0.3398  | 0.64587 | 0.33979 | 0.99246 | 0.33979 | 1.34343 |
| 0.40786 | 0.72386 | 0.33989 | 0.64641 | 0.33988 | 0.99273 | 0.33989 | 1.34361 |
| 0.40797 | 0.72396 | 0.33998 | 0.64669 | 0.33997 | 0.99309 | 0.33997 | 1.34415 |
| 0.40808 | 0.72423 | 0.34008 | 0.64714 | 0.34007 | 0.99346 | 0.34007 | 1.34443 |
| 0.40819 | 0.72469 | 0.34017 | 0.64759 | 0.34016 | 0.99337 | 0.34016 | 1.34479 |
| 0.4083  | 0.72496 | 0.34026 | 0.64814 | 0.34025 | 0.99392 | 0.34025 | 1.34479 |
| 0.40841 | 0.72505 | 0.34036 | 0.6486  | 0.34034 | 0.99419 | 0.34035 | 1.34589 |

|         |         |         |         |         |         |         |         |
|---------|---------|---------|---------|---------|---------|---------|---------|
| 0.40852 | 0.72523 | 0.34045 | 0.64914 | 0.34044 | 0.99428 | 0.34044 | 1.34643 |
| 0.40863 | 0.72532 | 0.34054 | 0.64951 | 0.34053 | 0.99474 | 0.34054 | 1.34688 |
| 0.40875 | 0.72578 | 0.34063 | 0.64996 | 0.34062 | 0.99501 | 0.34062 | 1.34734 |
| 0.40885 | 0.72614 | 0.34073 | 0.65033 | 0.34072 | 0.99537 | 0.34072 | 1.34716 |
| 0.40897 | 0.72633 | 0.34081 | 0.65078 | 0.34081 | 0.99583 | 0.34081 | 1.34734 |
| 0.40908 | 0.7266  | 0.34091 | 0.65133 | 0.3409  | 0.99601 | 0.3409  | 1.34834 |
| 0.40919 | 0.72706 | 0.341   | 0.65196 | 0.34099 | 0.99647 | 0.341   | 1.34871 |
| 0.4093  | 0.72696 | 0.3411  | 0.65232 | 0.34109 | 0.99664 | 0.34109 | 1.34907 |
| 0.40941 | 0.72696 | 0.34119 | 0.6526  | 0.34118 | 0.99674 | 0.34118 | 1.34998 |
| 0.40953 | 0.72724 | 0.34128 | 0.65306 | 0.34127 | 0.99692 | 0.34127 | 1.35016 |
| 0.40963 | 0.72742 | 0.34137 | 0.65315 | 0.34137 | 0.99728 | 0.34137 | 1.3508  |
| 0.40975 | 0.72742 | 0.34147 | 0.6536  | 0.34145 | 0.99756 | 0.34146 | 1.35125 |
| 0.40985 | 0.72787 | 0.34156 | 0.65387 | 0.34155 | 0.99819 | 0.34155 | 1.35161 |
| 0.40997 | 0.72824 | 0.34165 | 0.65469 | 0.34164 | 0.99865 | 0.34165 | 1.35234 |
| 0.41008 | 0.7286  | 0.34174 | 0.65505 | 0.34174 | 0.99901 | 0.34174 | 1.35317 |
| 0.41019 | 0.7286  | 0.34184 | 0.65533 | 0.34183 | 0.99947 | 0.34183 | 1.35353 |
| 0.4103  | 0.72896 | 0.34193 | 0.65597 | 0.34192 | 0.99974 | 0.34192 | 1.35417 |
| 0.41041 | 0.72914 | 0.34202 | 0.65652 | 0.34201 | 1.00001 | 0.34201 | 1.35471 |
| 0.41052 | 0.72951 | 0.34212 | 0.6567  | 0.3421  | 0.99993 | 0.34211 | 1.35489 |
| 0.41063 | 0.72979 | 0.34221 | 0.65697 | 0.3422  | 0.99993 | 0.3422  | 1.35535 |
| 0.41075 | 0.72979 | 0.3423  | 0.65724 | 0.34229 | 1.00083 | 0.3423  | 1.3558  |
| 0.41086 | 0.73015 | 0.34239 | 0.6576  | 0.34238 | 1.00111 | 0.34238 | 1.35635 |
| 0.41097 | 0.7306  | 0.34248 | 0.65815 | 0.34248 | 1.00138 | 0.34248 | 1.35662 |
| 0.41108 | 0.73033 | 0.34257 | 0.65878 | 0.34257 | 1.00174 | 0.34257 | 1.3569  |
| 0.41119 | 0.7307  | 0.34267 | 0.65906 | 0.34266 | 1.00174 | 0.34266 | 1.35717 |
| 0.4113  | 0.73115 | 0.34277 | 0.65925 | 0.34275 | 1.00201 | 0.34276 | 1.35808 |
| 0.41142 | 0.73124 | 0.34285 | 0.65979 | 0.34285 | 1.00247 | 0.34285 | 1.35872 |
| 0.41152 | 0.73169 | 0.34295 | 0.66015 | 0.34294 | 1.00284 | 0.34294 | 1.35853 |
| 0.41164 | 0.73197 | 0.34304 | 0.66079 | 0.34303 | 1.0032  | 0.34303 | 1.35881 |
| 0.41174 | 0.73197 | 0.34313 | 0.66124 | 0.34313 | 1.00374 | 0.34313 | 1.35899 |
| 0.41186 | 0.73233 | 0.34322 | 0.66161 | 0.34321 | 1.00429 | 0.34321 | 1.35944 |
| 0.41196 | 0.7326  | 0.34332 | 0.66197 | 0.34331 | 1.00447 | 0.34331 | 1.35999 |
| 0.41208 | 0.73288 | 0.34341 | 0.66224 | 0.3434  | 1.00475 | 0.34341 | 1.36036 |
| 0.41219 | 0.73324 | 0.3435  | 0.6628  | 0.3435  | 1.00511 | 0.3435  | 1.35999 |
| 0.4123  | 0.73342 | 0.3436  | 0.66306 | 0.34359 | 1.00539 | 0.34359 | 1.36099 |
| 0.41241 | 0.7336  | 0.34369 | 0.66352 | 0.34368 | 1.00556 | 0.34368 | 1.36154 |
| 0.41252 | 0.73406 | 0.34378 | 0.66388 | 0.34378 | 1.00602 | 0.34377 | 1.36208 |
| 0.41264 | 0.73406 | 0.34388 | 0.66434 | 0.34386 | 1.00647 | 0.34387 | 1.36272 |
| 0.41274 | 0.73425 | 0.34397 | 0.6648  | 0.34396 | 1.00702 | 0.34396 | 1.36263 |
| 0.41286 | 0.73452 | 0.34406 | 0.66543 | 0.34405 | 1.00693 | 0.34405 | 1.36309 |
| 0.41297 | 0.73443 | 0.34415 | 0.66579 | 0.34414 | 1.00684 | 0.34414 | 1.36381 |
| 0.41308 | 0.7347  | 0.34424 | 0.66598 | 0.34424 | 1.00721 | 0.34424 | 1.36454 |
| 0.41319 | 0.73506 | 0.34433 | 0.66653 | 0.34433 | 1.00793 | 0.34433 | 1.36445 |
| 0.4133  | 0.73561 | 0.34443 | 0.66698 | 0.34442 | 1.00839 | 0.34442 | 1.36463 |
| 0.41341 | 0.73561 | 0.34453 | 0.66761 | 0.34451 | 1.00839 | 0.34452 | 1.36509 |
| 0.41353 | 0.73615 | 0.34461 | 0.66798 | 0.34461 | 1.00848 | 0.34461 | 1.36609 |
| 0.41363 | 0.73625 | 0.34471 | 0.66834 | 0.3447  | 1.00884 | 0.3447  | 1.36672 |
| 0.41375 | 0.73615 | 0.3448  | 0.66871 | 0.34479 | 1.00894 | 0.34479 | 1.36764 |
| 0.41385 | 0.73652 | 0.34489 | 0.66898 | 0.34488 | 1.00948 | 0.34488 | 1.36819 |
| 0.41397 | 0.73689 | 0.34498 | 0.66934 | 0.34497 | 1.00957 | 0.34498 | 1.36873 |
| 0.41408 | 0.73716 | 0.34508 | 0.67007 | 0.34507 | 1.00957 | 0.34507 | 1.36946 |
| 0.41419 | 0.73761 | 0.34517 | 0.67062 | 0.34516 | 1.01003 | 0.34517 | 1.36964 |
| 0.4143  | 0.7377  | 0.34526 | 0.67098 | 0.34525 | 1.01048 | 0.34525 | 1.36991 |
| 0.41441 | 0.73816 | 0.34536 | 0.67135 | 0.34535 | 1.01057 | 0.34535 | 1.37082 |

|         |         |         |         |         |         |         |         |
|---------|---------|---------|---------|---------|---------|---------|---------|
| 0.41453 | 0.73852 | 0.34545 | 0.67189 | 0.34544 | 1.01102 | 0.34544 | 1.37082 |
| 0.41463 | 0.7387  | 0.34554 | 0.67226 | 0.34553 | 1.01112 | 0.34553 | 1.37146 |
| 0.41475 | 0.7388  | 0.34564 | 0.67253 | 0.34562 | 1.01148 | 0.34563 | 1.37209 |
| 0.41485 | 0.73897 | 0.34573 | 0.67308 | 0.34572 | 1.01148 | 0.34572 | 1.37255 |
| 0.41497 | 0.73897 | 0.34582 | 0.67362 | 0.34581 | 1.01203 | 0.34581 | 1.373   |
| 0.41508 | 0.73897 | 0.34591 | 0.67435 | 0.3459  | 1.01258 | 0.3459  | 1.37274 |
| 0.41519 | 0.73952 | 0.346   | 0.67444 | 0.346   | 1.01284 | 0.346   | 1.37319 |
| 0.4153  | 0.73988 | 0.34609 | 0.67472 | 0.34609 | 1.01303 | 0.34608 | 1.37328 |
| 0.41541 | 0.73988 | 0.34619 | 0.67545 | 0.34618 | 1.01312 | 0.34618 | 1.37419 |
| 0.41552 | 0.74034 | 0.34628 | 0.67581 | 0.34627 | 1.01339 | 0.34628 | 1.37464 |
| 0.41564 | 0.74053 | 0.34637 | 0.67617 | 0.34637 | 1.01366 | 0.34637 | 1.37473 |
| 0.41575 | 0.74061 | 0.34647 | 0.67636 | 0.34646 | 1.01403 | 0.34646 | 1.37565 |
| 0.41586 | 0.74071 | 0.34656 | 0.67681 | 0.34655 | 1.0143  | 0.34655 | 1.37619 |
| 0.41597 | 0.74116 | 0.34665 | 0.67708 | 0.34664 | 1.01458 | 0.34664 | 1.37638 |
| 0.41608 | 0.74161 | 0.34674 | 0.67754 | 0.34673 | 1.01522 | 0.34673 | 1.37701 |
| 0.41619 | 0.74171 | 0.34684 | 0.67791 | 0.34683 | 1.01504 | 0.34683 | 1.37792 |
| 0.4163  | 0.74189 | 0.34693 | 0.67845 | 0.34692 | 1.0154  | 0.34692 | 1.37847 |
| 0.41642 | 0.74198 | 0.34702 | 0.6789  | 0.34701 | 1.01576 | 0.34701 | 1.37883 |
| 0.41652 | 0.74216 | 0.34712 | 0.67927 | 0.34711 | 1.01595 | 0.34711 | 1.37856 |
| 0.41664 | 0.74271 | 0.34721 | 0.67963 | 0.3472  | 1.01603 | 0.3472  | 1.37956 |
| 0.41674 | 0.74289 | 0.3473  | 0.68009 | 0.34729 | 1.01667 | 0.34729 | 1.38029 |
| 0.41686 | 0.74307 | 0.34739 | 0.68036 | 0.34738 | 1.01695 | 0.34739 | 1.38083 |
| 0.41696 | 0.74326 | 0.34748 | 0.68082 | 0.34748 | 1.01704 | 0.34748 | 1.38138 |
| 0.41708 | 0.74371 | 0.34758 | 0.68163 | 0.34757 | 1.01731 | 0.34757 | 1.38248 |
| 0.41719 | 0.74426 | 0.34767 | 0.682   | 0.34766 | 1.01758 | 0.34766 | 1.38284 |
| 0.4173  | 0.74453 | 0.34776 | 0.68246 | 0.34776 | 1.01786 | 0.34776 | 1.38248 |
| 0.41741 | 0.7448  | 0.34785 | 0.68273 | 0.34784 | 1.0184  | 0.34784 | 1.3832  |
| 0.41752 | 0.74489 | 0.34795 | 0.68327 | 0.34794 | 1.01876 | 0.34794 | 1.38156 |
| 0.41764 | 0.74526 | 0.34804 | 0.684   | 0.34803 | 1.01931 | 0.34804 | 1.38138 |
| 0.41775 | 0.74526 | 0.34813 | 0.68428 | 0.34812 | 1.01986 | 0.34812 | 1.38201 |
| 0.41786 | 0.74553 | 0.34823 | 0.68491 | 0.34821 | 1.0204  | 0.34822 | 1.38274 |
| 0.41797 | 0.74589 | 0.34832 | 0.68528 | 0.34831 | 1.02113 | 0.34831 | 1.38356 |
| 0.41808 | 0.74644 | 0.34841 | 0.68546 | 0.34841 | 1.02167 | 0.34841 | 1.38375 |
| 0.41819 | 0.74672 | 0.3485  | 0.68609 | 0.34849 | 1.02185 | 0.34849 | 1.38566 |
| 0.4183  | 0.74708 | 0.34859 | 0.68664 | 0.34859 | 1.02223 | 0.34859 | 1.38666 |
| 0.41841 | 0.74735 | 0.34869 | 0.68691 | 0.34868 | 1.02277 | 0.34868 | 1.38666 |
| 0.41853 | 0.74753 | 0.34878 | 0.68709 | 0.34877 | 1.02304 | 0.34877 | 1.38693 |
| 0.41863 | 0.74771 | 0.34888 | 0.68783 | 0.34886 | 1.02358 | 0.34887 | 1.38793 |
| 0.41875 | 0.7479  | 0.34896 | 0.68819 | 0.34896 | 1.02431 | 0.34896 | 1.38766 |
| 0.41885 | 0.74835 | 0.34906 | 0.68864 | 0.34905 | 1.02459 | 0.34905 | 1.38621 |
| 0.41897 | 0.74871 | 0.34915 | 0.68928 | 0.34914 | 1.02514 | 0.34915 | 1.38647 |
| 0.41908 | 0.74853 | 0.34924 | 0.68964 | 0.34924 | 1.02504 | 0.34924 | 1.38839 |
| 0.41919 | 0.74889 | 0.34934 | 0.68946 | 0.34932 | 1.02568 | 0.34933 | 1.39003 |
| 0.4193  | 0.74908 | 0.34943 | 0.68964 | 0.34942 | 1.02632 | 0.34942 | 1.39076 |
| 0.41941 | 0.74936 | 0.34952 | 0.69037 | 0.34952 | 1.02659 | 0.34952 | 1.39157 |
| 0.41953 | 0.74954 | 0.34961 | 0.69101 | 0.3496  | 1.02678 | 0.3496  | 1.39139 |
| 0.41963 | 0.7499  | 0.34971 | 0.69165 | 0.3497  | 1.02741 | 0.3497  | 1.39212 |
| 0.41975 | 0.75045 | 0.3498  | 0.6921  | 0.34979 | 1.02769 | 0.34979 | 1.3923  |
| 0.41986 | 0.75071 | 0.34989 | 0.69219 | 0.34988 | 1.02796 | 0.34988 | 1.39249 |
| 0.41997 | 0.75117 | 0.34999 | 0.69274 | 0.34997 | 1.02832 | 0.34998 | 1.39276 |
| 0.42008 | 0.7509  | 0.35008 | 0.69328 | 0.35007 | 1.02868 | 0.35007 | 1.39321 |
| 0.42019 | 0.75099 | 0.35017 | 0.69365 | 0.35016 | 1.02896 | 0.35016 | 1.39385 |
| 0.4203  | 0.75117 | 0.35026 | 0.69411 | 0.35025 | 1.02905 | 0.35025 | 1.39439 |
| 0.42041 | 0.7519  | 0.35035 | 0.69447 | 0.35035 | 1.02978 | 0.35035 | 1.39494 |

|         |         |         |         |         |         |         |         |
|---------|---------|---------|---------|---------|---------|---------|---------|
| 0.42052 | 0.75217 | 0.35045 | 0.69484 | 0.35044 | 1.02996 | 0.35044 | 1.39522 |
| 0.42064 | 0.75227 | 0.35054 | 0.6951  | 0.35053 | 1.03005 | 0.35053 | 1.39585 |
| 0.42075 | 0.75245 | 0.35064 | 0.69547 | 0.35062 | 1.03014 | 0.35063 | 1.39639 |
| 0.42086 | 0.75254 | 0.35072 | 0.6962  | 0.35072 | 1.0305  | 0.35072 | 1.39676 |
| 0.42097 | 0.75309 | 0.35082 | 0.69692 | 0.35081 | 1.03096 | 0.35081 | 1.39767 |
| 0.42108 | 0.75345 | 0.35091 | 0.69738 | 0.3509  | 1.03141 | 0.3509  | 1.39803 |
| 0.42119 | 0.75363 | 0.351   | 0.69765 | 0.351   | 1.03187 | 0.35099 | 1.39803 |
| 0.4213  | 0.75363 | 0.3511  | 0.69793 | 0.35108 | 1.03205 | 0.35109 | 1.39849 |
| 0.42142 | 0.754   | 0.35119 | 0.69838 | 0.35118 | 1.0326  | 0.35118 | 1.39858 |
| 0.42152 | 0.75418 | 0.35128 | 0.69911 | 0.35127 | 1.0326  | 0.35127 | 1.3994  |
| 0.42164 | 0.75463 | 0.35137 | 0.69965 | 0.35137 | 1.03287 | 0.35136 | 1.40022 |
| 0.42174 | 0.7549  | 0.35147 | 0.69984 | 0.35146 | 1.03323 | 0.35146 | 1.40013 |
| 0.42186 | 0.75499 | 0.35155 | 0.7002  | 0.35155 | 1.03351 | 0.35155 | 1.40059 |
| 0.42197 | 0.75508 | 0.35165 | 0.70056 | 0.35164 | 1.0336  | 0.35164 | 1.40122 |
| 0.42208 | 0.75564 | 0.35175 | 0.70093 | 0.35173 | 1.03414 | 0.35174 | 1.4014  |
| 0.42219 | 0.75572 | 0.35184 | 0.7013  | 0.35183 | 1.03442 | 0.35183 | 1.40186 |
| 0.4223  | 0.75609 | 0.35193 | 0.70193 | 0.35192 | 1.0346  | 0.35192 | 1.4025  |
| 0.42241 | 0.75609 | 0.35202 | 0.7023  | 0.35201 | 1.03488 | 0.35201 | 1.40277 |
| 0.42252 | 0.75673 | 0.35212 | 0.70247 | 0.35211 | 1.03506 | 0.35211 | 1.40341 |
| 0.42264 | 0.75673 | 0.35221 | 0.70302 | 0.3522  | 1.0356  | 0.3522  | 1.4045  |
| 0.42275 | 0.75691 | 0.3523  | 0.70411 | 0.35229 | 1.0356  | 0.35229 | 1.40468 |
| 0.42286 | 0.757   | 0.35239 | 0.70393 | 0.35238 | 1.03588 | 0.35239 | 1.40459 |
| 0.42297 | 0.75718 | 0.35248 | 0.70429 | 0.35248 | 1.03661 | 0.35248 | 1.40496 |
| 0.42308 | 0.75763 | 0.35258 | 0.70466 | 0.35257 | 1.0367  | 0.35257 | 1.40605 |
| 0.42319 | 0.75818 | 0.35267 | 0.70476 | 0.35266 | 1.03688 | 0.35266 | 1.40714 |
| 0.4233  | 0.75827 | 0.35276 | 0.7053  | 0.35275 | 1.03733 | 0.35275 | 1.40696 |
| 0.42341 | 0.75873 | 0.35286 | 0.70612 | 0.35284 | 1.03787 | 0.35285 | 1.40805 |
| 0.42353 | 0.75891 | 0.35295 | 0.70639 | 0.35294 | 1.03743 | 0.35294 | 1.40814 |
| 0.42363 | 0.759   | 0.35304 | 0.70693 | 0.35304 | 1.03779 | 0.35304 | 1.40805 |
| 0.42375 | 0.75909 | 0.35313 | 0.70748 | 0.35312 | 1.03842 | 0.35312 | 1.40851 |
| 0.42385 | 0.75936 | 0.35323 | 0.70767 | 0.35322 | 1.03878 | 0.35322 | 1.40923 |
| 0.42397 | 0.75973 | 0.35331 | 0.7083  | 0.35331 | 1.03897 | 0.35331 | 1.41005 |
| 0.42408 | 0.76    | 0.35341 | 0.70867 | 0.3534  | 1.03897 | 0.3534  | 1.41042 |
| 0.42419 | 0.76037 | 0.35351 | 0.7093  | 0.35349 | 1.03915 | 0.3535  | 1.41042 |
| 0.4243  | 0.76037 | 0.3536  | 0.70967 | 0.35359 | 1.0397  | 0.35359 | 1.41096 |
| 0.42441 | 0.76073 | 0.35369 | 0.71012 | 0.35368 | 1.04016 | 0.35368 | 1.41141 |
| 0.42453 | 0.76128 | 0.35378 | 0.71067 | 0.35377 | 1.04061 | 0.35377 | 1.41169 |
| 0.42463 | 0.76146 | 0.35387 | 0.71112 | 0.35387 | 1.04061 | 0.35387 | 1.41233 |
| 0.42475 | 0.76146 | 0.35397 | 0.71158 | 0.35396 | 1.04079 | 0.35396 | 1.41278 |
| 0.42485 | 0.76182 | 0.35406 | 0.71222 | 0.35405 | 1.04106 | 0.35405 | 1.41332 |
| 0.42497 | 0.76209 | 0.35415 | 0.71258 | 0.35414 | 1.04124 | 0.35415 | 1.41387 |
| 0.42508 | 0.76219 | 0.35424 | 0.71267 | 0.35424 | 1.04179 | 0.35424 | 1.41451 |
| 0.42519 | 0.76246 | 0.35434 | 0.71312 | 0.35433 | 1.04216 | 0.35433 | 1.41469 |
| 0.4253  | 0.76274 | 0.35443 | 0.71377 | 0.35442 | 1.04252 | 0.35442 | 1.41588 |
| 0.42541 | 0.76328 | 0.35452 | 0.71422 | 0.35451 | 1.04261 | 0.35451 | 1.41596 |
| 0.42552 | 0.76346 | 0.35462 | 0.71459 | 0.3546  | 1.04306 | 0.35461 | 1.41642 |
| 0.42563 | 0.76346 | 0.35471 | 0.71504 | 0.3547  | 1.04315 | 0.3547  | 1.4177  |
| 0.42575 | 0.76364 | 0.3548  | 0.71531 | 0.3548  | 1.04334 | 0.3548  | 1.41797 |
| 0.42586 | 0.76373 | 0.35489 | 0.71567 | 0.35488 | 1.04361 | 0.35488 | 1.41833 |
| 0.42597 | 0.76401 | 0.35498 | 0.7164  | 0.35498 | 1.04416 | 0.35498 | 1.41915 |
| 0.42608 | 0.76401 | 0.35507 | 0.71658 | 0.35507 | 1.04443 | 0.35507 | 1.41952 |
| 0.42619 | 0.76455 | 0.35517 | 0.71686 | 0.35516 | 1.04452 | 0.35516 | 1.4197  |
| 0.4263  | 0.76473 | 0.35526 | 0.7174  | 0.35525 | 1.04461 | 0.35526 | 1.41997 |
| 0.42642 | 0.76482 | 0.35535 | 0.71795 | 0.35535 | 1.04516 | 0.35535 | 1.42079 |

|         |         |         |         |         |         |         |         |
|---------|---------|---------|---------|---------|---------|---------|---------|
| 0.42652 | 0.76519 | 0.35545 | 0.71832 | 0.35544 | 1.04579 | 0.35544 | 1.42106 |
| 0.42664 | 0.76528 | 0.35554 | 0.71868 | 0.35553 | 1.04598 | 0.35553 | 1.4217  |
| 0.42674 | 0.76528 | 0.35563 | 0.71904 | 0.35563 | 1.04616 | 0.35563 | 1.42225 |
| 0.42686 | 0.76574 | 0.35573 | 0.71922 | 0.35572 | 1.04653 | 0.35572 | 1.4227  |
| 0.42696 | 0.76582 | 0.35582 | 0.71968 | 0.35581 | 1.04716 | 0.35581 | 1.42289 |
| 0.42708 | 0.7661  | 0.35591 | 0.72041 | 0.3559  | 1.04734 | 0.35591 | 1.42343 |
| 0.42719 | 0.76647 | 0.356   | 0.72096 | 0.356   | 1.04761 | 0.356   | 1.42379 |
| 0.4273  | 0.76673 | 0.3561  | 0.72122 | 0.35609 | 1.04807 | 0.35609 | 1.42453 |
| 0.42741 | 0.76692 | 0.35618 | 0.72159 | 0.35618 | 1.04843 | 0.35618 | 1.42497 |
| 0.42752 | 0.76719 | 0.35628 | 0.72205 | 0.35627 | 1.04862 | 0.35627 | 1.42552 |
| 0.42764 | 0.76728 | 0.35638 | 0.7225  | 0.35636 | 1.04944 | 0.35637 | 1.42598 |
| 0.42775 | 0.76774 | 0.35646 | 0.72278 | 0.35646 | 1.04971 | 0.35646 | 1.42634 |
| 0.42786 | 0.7681  | 0.35656 | 0.72314 | 0.35655 | 1.04971 | 0.35655 | 1.42698 |
| 0.42797 | 0.76819 | 0.35665 | 0.72386 | 0.35664 | 1.04999 | 0.35664 | 1.42761 |
| 0.42808 | 0.76837 | 0.35675 | 0.72386 | 0.35674 | 1.05017 | 0.35674 | 1.42744 |
| 0.42819 | 0.76865 | 0.35683 | 0.72441 | 0.35683 | 1.05007 | 0.35683 | 1.42807 |
| 0.4283  | 0.76911 | 0.35693 | 0.72505 | 0.35692 | 1.05034 | 0.35692 | 1.42843 |
| 0.42841 | 0.7692  | 0.35702 | 0.7255  | 0.35701 | 1.05071 | 0.35702 | 1.42908 |
| 0.42852 | 0.76974 | 0.35711 | 0.72587 | 0.35711 | 1.05098 | 0.35711 | 1.42953 |
| 0.42863 | 0.76974 | 0.35721 | 0.72614 | 0.3572  | 1.05116 | 0.3572  | 1.43053 |
| 0.42875 | 0.76992 | 0.3573  | 0.7266  | 0.35729 | 1.05162 | 0.35729 | 1.43089 |
| 0.42885 | 0.77002 | 0.35739 | 0.72724 | 0.35739 | 1.05208 | 0.35739 | 1.43162 |
| 0.42897 | 0.77074 | 0.35748 | 0.7275  | 0.35748 | 1.05235 | 0.35748 | 1.43217 |
| 0.42908 | 0.7712  | 0.35758 | 0.72815 | 0.35757 | 1.05263 | 0.35757 | 1.43217 |
| 0.42919 | 0.77128 | 0.35767 | 0.72842 | 0.35766 | 1.05335 | 0.35766 | 1.43226 |
| 0.4293  | 0.77156 | 0.35776 | 0.7286  | 0.35775 | 1.05353 | 0.35775 | 1.43326 |
| 0.42941 | 0.77156 | 0.35786 | 0.72914 | 0.35785 | 1.0538  | 0.35785 | 1.4338  |
| 0.42953 | 0.77202 | 0.35794 | 0.72979 | 0.35794 | 1.05408 | 0.35794 | 1.43389 |
| 0.42963 | 0.77229 | 0.35804 | 0.73033 | 0.35803 | 1.05435 | 0.35803 | 1.43471 |
| 0.42975 | 0.77247 | 0.35814 | 0.73051 | 0.35812 | 1.05463 | 0.35813 | 1.4349  |
| 0.42986 | 0.77293 | 0.35822 | 0.73079 | 0.35822 | 1.0549  | 0.35822 | 1.43545 |
| 0.42997 | 0.77293 | 0.35832 | 0.73124 | 0.35831 | 1.05553 | 0.35831 | 1.43599 |
| 0.43008 | 0.7732  | 0.35841 | 0.73206 | 0.3584  | 1.05581 | 0.3584  | 1.4359  |
| 0.43019 | 0.77347 | 0.35851 | 0.73242 | 0.3585  | 1.05608 | 0.3585  | 1.43553 |
| 0.4303  | 0.77356 | 0.35859 | 0.73287 | 0.35859 | 1.05672 | 0.35859 | 1.43572 |
| 0.43041 | 0.77384 | 0.35869 | 0.73324 | 0.35868 | 1.05699 | 0.35868 | 1.43608 |
| 0.43052 | 0.77439 | 0.35878 | 0.73342 | 0.35877 | 1.05727 | 0.35878 | 1.437   |
| 0.43064 | 0.7742  | 0.35887 | 0.73388 | 0.35886 | 1.05744 | 0.35886 | 1.43845 |
| 0.43075 | 0.77457 | 0.35897 | 0.73424 | 0.35895 | 1.05763 | 0.35896 | 1.43881 |
| 0.43086 | 0.77493 | 0.35906 | 0.73479 | 0.35905 | 1.05826 | 0.35905 | 1.43872 |
| 0.43097 | 0.77511 | 0.35915 | 0.73533 | 0.35915 | 1.05854 | 0.35915 | 1.43963 |
| 0.43108 | 0.7752  | 0.35925 | 0.73551 | 0.35923 | 1.0589  | 0.35924 | 1.44045 |
| 0.43119 | 0.77556 | 0.35934 | 0.73597 | 0.35933 | 1.05936 | 0.35933 | 1.44054 |
| 0.4313  | 0.77575 | 0.35943 | 0.73625 | 0.35942 | 1.05927 | 0.35942 | 1.44018 |
| 0.43142 | 0.77611 | 0.35952 | 0.73679 | 0.35951 | 1.05981 | 0.35951 | 1.43991 |
| 0.43152 | 0.77639 | 0.35962 | 0.73698 | 0.35961 | 1.06027 | 0.35961 | 1.44054 |
| 0.43164 | 0.77675 | 0.35971 | 0.73752 | 0.3597  | 1.06017 | 0.3597  | 1.44182 |
| 0.43174 | 0.77712 | 0.3598  | 0.73816 | 0.35979 | 1.06027 | 0.35979 | 1.44218 |
| 0.43186 | 0.77747 | 0.35989 | 0.73861 | 0.35988 | 1.06081 | 0.35989 | 1.44209 |
| 0.43196 | 0.77757 | 0.35998 | 0.73906 | 0.35998 | 1.06109 | 0.35998 | 1.44345 |
| 0.43208 | 0.77784 | 0.36008 | 0.73952 | 0.36007 | 1.06145 | 0.36007 | 1.44282 |
| 0.43219 | 0.77802 | 0.36017 | 0.73988 | 0.36016 | 1.06182 | 0.36016 | 1.44291 |
| 0.4323  | 0.7782  | 0.36026 | 0.74006 | 0.36026 | 1.06236 | 0.36026 | 1.44364 |
| 0.43241 | 0.77857 | 0.36035 | 0.74043 | 0.36035 | 1.0629  | 0.36035 | 1.44428 |



|         |         |         |         |         |         |         |         |
|---------|---------|---------|---------|---------|---------|---------|---------|
| 0.43252 | 0.77911 | 0.36045 | 0.74061 | 0.36044 | 1.06318 | 0.36044 | 1.44482 |
| 0.43264 | 0.77948 | 0.36054 | 0.74098 | 0.36053 | 1.06282 | 0.36054 | 1.44609 |
| 0.43274 | 0.77966 | 0.36063 | 0.74143 | 0.36062 | 1.06345 | 0.36062 | 1.44673 |
| 0.43286 | 0.77966 | 0.36073 | 0.74207 | 0.36072 | 1.06409 | 0.36072 | 1.44764 |
| 0.43297 | 0.77984 | 0.36082 | 0.74243 | 0.36081 | 1.06409 | 0.36081 | 1.44792 |
| 0.43308 | 0.78012 | 0.36091 | 0.74307 | 0.36091 | 1.06418 | 0.36091 | 1.44782 |
| 0.43319 | 0.78039 | 0.361   | 0.74316 | 0.36099 | 1.06445 | 0.361   | 1.44828 |
| 0.4333  | 0.78066 | 0.36109 | 0.74362 | 0.36109 | 1.06482 | 0.36109 | 1.44873 |
| 0.43341 | 0.78075 | 0.36119 | 0.74426 | 0.36118 | 1.06527 | 0.36118 | 1.44892 |
| 0.43353 | 0.78102 | 0.36128 | 0.7448  | 0.36127 | 1.06555 | 0.36127 | 1.44991 |
| 0.43363 | 0.7813  | 0.36138 | 0.74508 | 0.36137 | 1.06582 | 0.36137 | 1.45055 |
| 0.43375 | 0.78184 | 0.36146 | 0.74544 | 0.36146 | 1.06628 | 0.36146 | 1.45055 |
| 0.43385 | 0.78203 | 0.36156 | 0.7458  | 0.36155 | 1.06655 | 0.36155 | 1.45073 |
| 0.43397 | 0.78221 | 0.36165 | 0.74635 | 0.36164 | 1.06664 | 0.36165 | 1.45165 |
| 0.43408 | 0.78239 | 0.36174 | 0.74681 | 0.36174 | 1.06746 | 0.36174 | 1.45192 |
| 0.43419 | 0.78267 | 0.36184 | 0.74708 | 0.36182 | 1.06755 | 0.36183 | 1.45274 |
| 0.4343  | 0.78303 | 0.36193 | 0.74744 | 0.36192 | 1.06792 | 0.36192 | 1.45328 |
| 0.43441 | 0.7833  | 0.36202 | 0.74771 | 0.36201 | 1.06818 | 0.36202 | 1.45401 |
| 0.43453 | 0.78367 | 0.36211 | 0.74817 | 0.36211 | 1.06846 | 0.36211 | 1.45411 |
| 0.43463 | 0.78385 | 0.36221 | 0.74853 | 0.3622  | 1.06873 | 0.3622  | 1.45447 |
| 0.43475 | 0.78403 | 0.3623  | 0.7488  | 0.36229 | 1.06892 | 0.3623  | 1.45492 |
| 0.43486 | 0.78476 | 0.36239 | 0.74899 | 0.36239 | 1.06901 | 0.36239 | 1.4551  |
| 0.43497 | 0.78503 | 0.36249 | 0.74935 | 0.36247 | 1.06928 | 0.36248 | 1.45547 |
| 0.43508 | 0.78503 | 0.36258 | 0.7499  | 0.36257 | 1.06983 | 0.36257 | 1.45592 |
| 0.43519 | 0.7854  | 0.36267 | 0.75017 | 0.36266 | 1.07    | 0.36266 | 1.45583 |
| 0.4353  | 0.78531 | 0.36276 | 0.75063 | 0.36275 | 1.07019 | 0.36275 | 1.4572  |
| 0.43541 | 0.78576 | 0.36285 | 0.75108 | 0.36285 | 1.07037 | 0.36285 | 1.45747 |
| 0.43552 | 0.78631 | 0.36295 | 0.75199 | 0.36294 | 1.07092 | 0.36294 | 1.45847 |
| 0.43564 | 0.78604 | 0.36304 | 0.75235 | 0.36303 | 1.07101 | 0.36303 | 1.45902 |
| 0.43575 | 0.78622 | 0.36313 | 0.75281 | 0.36312 | 1.07174 | 0.36313 | 1.45957 |
| 0.43586 | 0.78648 | 0.36322 | 0.75309 | 0.36322 | 1.07201 | 0.36322 | 1.45966 |
| 0.43597 | 0.78694 | 0.36332 | 0.75344 | 0.36331 | 1.07219 | 0.36331 | 1.4602  |
| 0.43608 | 0.78694 | 0.36341 | 0.7539  | 0.3634  | 1.07264 | 0.3634  | 1.46065 |
| 0.43619 | 0.78712 | 0.3635  | 0.75427 | 0.3635  | 1.07301 | 0.36349 | 1.46111 |
| 0.4363  | 0.78712 | 0.3636  | 0.75482 | 0.36358 | 1.07274 | 0.36359 | 1.4613  |
| 0.43642 | 0.7873  | 0.36369 | 0.75536 | 0.36368 | 1.07337 | 0.36368 | 1.46166 |
| 0.43652 | 0.78767 | 0.36378 | 0.75563 | 0.36378 | 1.07392 | 0.36378 | 1.46221 |
| 0.43664 | 0.78804 | 0.36387 | 0.7559  | 0.36387 | 1.0742  | 0.36386 | 1.46257 |
| 0.43674 | 0.78849 | 0.36397 | 0.75655 | 0.36396 | 1.07438 | 0.36396 | 1.4632  |
| 0.43686 | 0.78903 | 0.36406 | 0.75681 | 0.36405 | 1.07501 | 0.36406 | 1.46311 |
| 0.43696 | 0.78931 | 0.36415 | 0.75736 | 0.36414 | 1.07519 | 0.36414 | 1.46375 |
| 0.43708 | 0.78958 | 0.36425 | 0.75782 | 0.36423 | 1.07519 | 0.36424 | 1.46439 |
| 0.43719 | 0.78967 | 0.36433 | 0.75809 | 0.36433 | 1.07529 | 0.36433 | 1.46484 |
| 0.4373  | 0.78986 | 0.36443 | 0.75863 | 0.36442 | 1.07583 | 0.36442 | 1.46539 |
| 0.43741 | 0.79004 | 0.36452 | 0.759   | 0.36451 | 1.07656 | 0.36451 | 1.46648 |
| 0.43752 | 0.79013 | 0.36461 | 0.75936 | 0.36461 | 1.07665 | 0.36461 | 1.46667 |
| 0.43764 | 0.7904  | 0.36471 | 0.75982 | 0.3647  | 1.07684 | 0.3647  | 1.46712 |
| 0.43775 | 0.79077 | 0.3648  | 0.76028 | 0.36479 | 1.07711 | 0.36479 | 1.46776 |
| 0.43786 | 0.79113 | 0.36489 | 0.76064 | 0.36488 | 1.07766 | 0.36489 | 1.4683  |
| 0.43797 | 0.7914  | 0.36498 | 0.76128 | 0.36498 | 1.07774 | 0.36498 | 1.46821 |
| 0.43808 | 0.79168 | 0.36508 | 0.76145 | 0.36507 | 1.07792 | 0.36507 | 1.4683  |
| 0.43819 | 0.79195 | 0.36517 | 0.76155 | 0.36516 | 1.07829 | 0.36516 | 1.46894 |
| 0.4383  | 0.79195 | 0.36526 | 0.76227 | 0.36525 | 1.07838 | 0.36525 | 1.46976 |
| 0.43841 | 0.79213 | 0.36536 | 0.76246 | 0.36534 | 1.0792  | 0.36535 | 1.46994 |

|         |         |         |         |         |         |         |         |
|---------|---------|---------|---------|---------|---------|---------|---------|
| 0.43853 | 0.7925  | 0.36545 | 0.76273 | 0.36544 | 1.07938 | 0.36544 | 1.47058 |
| 0.43863 | 0.79304 | 0.36554 | 0.76301 | 0.36553 | 1.07966 | 0.36553 | 1.4714  |
| 0.43875 | 0.7934  | 0.36563 | 0.76355 | 0.36562 | 1.07993 | 0.36562 | 1.4714  |
| 0.43885 | 0.7934  | 0.36573 | 0.76401 | 0.36572 | 1.07974 | 0.36572 | 1.47213 |
| 0.43897 | 0.79377 | 0.36582 | 0.76437 | 0.36581 | 1.07993 | 0.36582 | 1.47267 |
| 0.43908 | 0.79386 | 0.36591 | 0.76464 | 0.3659  | 1.08039 | 0.3659  | 1.47331 |
| 0.43919 | 0.79413 | 0.366   | 0.76491 | 0.36599 | 1.08065 | 0.366   | 1.47376 |
| 0.4393  | 0.7945  | 0.36609 | 0.76546 | 0.36609 | 1.08111 | 0.36609 | 1.47458 |
| 0.43941 | 0.79468 | 0.36619 | 0.7661  | 0.36618 | 1.08139 | 0.36618 | 1.47549 |
| 0.43953 | 0.79477 | 0.36628 | 0.76637 | 0.36627 | 1.08184 | 0.36627 | 1.4754  |
| 0.43963 | 0.79505 | 0.36637 | 0.76692 | 0.36637 | 1.08202 | 0.36637 | 1.47604 |
| 0.43975 | 0.79531 | 0.36647 | 0.76737 | 0.36645 | 1.08266 | 0.36646 | 1.47649 |
| 0.43985 | 0.79568 | 0.36656 | 0.76755 | 0.36655 | 1.08302 | 0.36655 | 1.47668 |
| 0.43997 | 0.79614 | 0.36665 | 0.76792 | 0.36664 | 1.0832  | 0.36665 | 1.47731 |
| 0.44008 | 0.79632 | 0.36674 | 0.76829 | 0.36673 | 1.08384 | 0.36673 | 1.47767 |
| 0.44019 | 0.7965  | 0.36684 | 0.76901 | 0.36683 | 1.08421 | 0.36683 | 1.47795 |
| 0.4403  | 0.79714 | 0.36693 | 0.76974 | 0.36692 | 1.08402 | 0.36692 | 1.47822 |
| 0.44041 | 0.79714 | 0.36702 | 0.77011 | 0.36702 | 1.08484 | 0.36702 | 1.47859 |
| 0.44052 | 0.79732 | 0.36712 | 0.77029 | 0.3671  | 1.08521 | 0.36711 | 1.47931 |
| 0.44063 | 0.79778 | 0.36721 | 0.77074 | 0.3672  | 1.08503 | 0.3672  | 1.47986 |
| 0.44075 | 0.79796 | 0.3673  | 0.77128 | 0.36729 | 1.0853  | 0.36729 | 1.48004 |
| 0.44086 | 0.79814 | 0.36739 | 0.77156 | 0.36738 | 1.08575 | 0.36738 | 1.48114 |
| 0.44097 | 0.79832 | 0.36749 | 0.77202 | 0.36748 | 1.08612 | 0.36748 | 1.48204 |
| 0.44108 | 0.79887 | 0.36758 | 0.77229 | 0.36757 | 1.08657 | 0.36757 | 1.48204 |
| 0.44119 | 0.79905 | 0.36767 | 0.77275 | 0.36766 | 1.08712 | 0.36766 | 1.48241 |
| 0.4413  | 0.79932 | 0.36776 | 0.7732  | 0.36775 | 1.08757 | 0.36776 | 1.48286 |
| 0.44142 | 0.79987 | 0.36785 | 0.77384 | 0.36785 | 1.08776 | 0.36785 | 1.48305 |
| 0.44152 | 0.80014 | 0.36795 | 0.7742  | 0.36794 | 1.08784 | 0.36794 | 1.48396 |
| 0.44164 | 0.80014 | 0.36804 | 0.77457 | 0.36803 | 1.08803 | 0.36803 | 1.48396 |
| 0.44174 | 0.80033 | 0.36813 | 0.77493 | 0.36813 | 1.08858 | 0.36813 | 1.48405 |
| 0.44186 | 0.80077 | 0.36823 | 0.7752  | 0.36821 | 1.08858 | 0.36822 | 1.4846  |
| 0.44196 | 0.80142 | 0.36832 | 0.77548 | 0.36831 | 1.08894 | 0.36831 | 1.48532 |
| 0.44208 | 0.80124 | 0.36841 | 0.77584 | 0.3684  | 1.0894  | 0.3684  | 1.48532 |
| 0.44219 | 0.80142 | 0.3685  | 0.77657 | 0.36849 | 1.08957 | 0.36849 | 1.48596 |
| 0.4423  | 0.80142 | 0.3686  | 0.77693 | 0.36859 | 1.08994 | 0.36859 | 1.48687 |
| 0.44241 | 0.80178 | 0.36869 | 0.77702 | 0.36868 | 1.0903  | 0.36868 | 1.48714 |
| 0.44252 | 0.80215 | 0.36878 | 0.77738 | 0.36878 | 1.09094 | 0.36877 | 1.48741 |
| 0.44264 | 0.8025  | 0.36888 | 0.77766 | 0.36886 | 1.09104 | 0.36887 | 1.4886  |
| 0.44274 | 0.80242 | 0.36896 | 0.77829 | 0.36896 | 1.09149 | 0.36896 | 1.48878 |
| 0.44286 | 0.80305 | 0.36906 | 0.77866 | 0.36905 | 1.09185 | 0.36905 | 1.48932 |
| 0.44297 | 0.80314 | 0.36915 | 0.77911 | 0.36914 | 1.0923  | 0.36914 | 1.49024 |
| 0.44308 | 0.80351 | 0.36925 | 0.77975 | 0.36924 | 1.09249 | 0.36924 | 1.49033 |
| 0.44319 | 0.8036  | 0.36933 | 0.78012 | 0.36933 | 1.09276 | 0.36933 | 1.49088 |
| 0.4433  | 0.80396 | 0.36943 | 0.78039 | 0.36942 | 1.09285 | 0.36942 | 1.4917  |
| 0.44341 | 0.80433 | 0.36952 | 0.78066 | 0.36951 | 1.0934  | 0.36952 | 1.49178 |
| 0.44353 | 0.8046  | 0.36961 | 0.7813  | 0.36961 | 1.09376 | 0.36961 | 1.49233 |
| 0.44363 | 0.80478 | 0.36971 | 0.78184 | 0.3697  | 1.09386 | 0.3697  | 1.49269 |
| 0.44375 | 0.80497 | 0.3698  | 0.78221 | 0.36979 | 1.0944  | 0.36979 | 1.49324 |
| 0.44385 | 0.80533 | 0.36989 | 0.78258 | 0.36988 | 1.09477 | 0.36988 | 1.49379 |
| 0.44397 | 0.80542 | 0.36998 | 0.78303 | 0.36998 | 1.09503 | 0.36998 | 1.49424 |
| 0.44408 | 0.8056  | 0.37008 | 0.78339 | 0.37007 | 1.09522 | 0.37007 | 1.49451 |
| 0.44419 | 0.80597 | 0.37017 | 0.78367 | 0.37016 | 1.09558 | 0.37016 | 1.49506 |
| 0.4443  | 0.80615 | 0.37026 | 0.78394 | 0.37025 | 1.09585 | 0.37025 | 1.4957  |
| 0.44441 | 0.8066  | 0.37036 | 0.7843  | 0.37035 | 1.09613 | 0.37035 | 1.49642 |

|         |         |         |         |         |         |         |         |
|---------|---------|---------|---------|---------|---------|---------|---------|
| 0.44453 | 0.80669 | 0.37045 | 0.78467 | 0.37044 | 1.09677 | 0.37044 | 1.49661 |
| 0.44463 | 0.80715 | 0.37054 | 0.78513 | 0.37053 | 1.09695 | 0.37053 | 1.49697 |
| 0.44475 | 0.80742 | 0.37064 | 0.78567 | 0.37062 | 1.09731 | 0.37063 | 1.49734 |
| 0.44485 | 0.80742 | 0.37073 | 0.78603 | 0.37072 | 1.09786 | 0.37072 | 1.49716 |
| 0.44497 | 0.8076  | 0.37082 | 0.78648 | 0.37081 | 1.09777 | 0.37081 | 1.49825 |
| 0.44508 | 0.80806 | 0.37091 | 0.78685 | 0.3709  | 1.09795 | 0.3709  | 1.49889 |
| 0.44519 | 0.80852 | 0.37101 | 0.78712 | 0.371   | 1.0985  | 0.371   | 1.49943 |
| 0.4453  | 0.80852 | 0.37109 | 0.78767 | 0.37109 | 1.09859 | 0.37109 | 1.49943 |
| 0.44541 | 0.8087  | 0.37119 | 0.78767 | 0.37118 | 1.09922 | 0.37118 | 1.49961 |
| 0.44552 | 0.80897 | 0.37128 | 0.78804 | 0.37127 | 1.09922 | 0.37128 | 1.50062 |
| 0.44564 | 0.80933 | 0.37137 | 0.78858 | 0.37136 | 1.09959 | 0.37136 | 1.50098 |
| 0.44575 | 0.80942 | 0.37147 | 0.78903 | 0.37146 | 1.09995 | 0.37146 | 1.50162 |
| 0.44586 | 0.80961 | 0.37156 | 0.78931 | 0.37155 | 1.10049 | 0.37155 | 1.50189 |
| 0.44597 | 0.81006 | 0.37165 | 0.78977 | 0.37165 | 1.10059 | 0.37165 | 1.50261 |
| 0.44608 | 0.81051 | 0.37174 | 0.78995 | 0.37173 | 1.10096 | 0.37174 | 1.50289 |
| 0.44619 | 0.8106  | 0.37184 | 0.79049 | 0.37183 | 1.10123 | 0.37183 | 1.50362 |
| 0.4463  | 0.81088 | 0.37193 | 0.79095 | 0.37192 | 1.10168 | 0.37192 | 1.50453 |
| 0.44642 | 0.81088 | 0.37202 | 0.79158 | 0.37201 | 1.10195 | 0.37201 | 1.50534 |
| 0.44652 | 0.81151 | 0.37212 | 0.79176 | 0.37211 | 1.10187 | 0.37211 | 1.50599 |
| 0.44664 | 0.81161 | 0.37221 | 0.79213 | 0.3722  | 1.10195 | 0.3722  | 1.50671 |
| 0.44674 | 0.81207 | 0.3723  | 0.79268 | 0.37229 | 1.1025  | 0.37229 | 1.50744 |
| 0.44686 | 0.81216 | 0.3724  | 0.79286 | 0.37238 | 1.10304 | 0.37239 | 1.50735 |
| 0.44696 | 0.81234 | 0.37248 | 0.7934  | 0.37248 | 1.1035  | 0.37248 | 1.50844 |
| 0.44708 | 0.81261 | 0.37258 | 0.79377 | 0.37257 | 1.10386 | 0.37257 | 1.50908 |
| 0.44719 | 0.81315 | 0.37267 | 0.79413 | 0.37266 | 1.10414 | 0.37266 | 1.50944 |
| 0.4473  | 0.81352 | 0.37276 | 0.79477 | 0.37276 | 1.10414 | 0.37276 | 1.50963 |
| 0.44741 | 0.81352 | 0.37285 | 0.79513 | 0.37285 | 1.10451 | 0.37285 | 1.50999 |
| 0.44752 | 0.81352 | 0.37295 | 0.79559 | 0.37294 | 1.1046  | 0.37294 | 1.51081 |
| 0.44764 | 0.8138  | 0.37304 | 0.79577 | 0.37303 | 1.10505 | 0.37304 | 1.51108 |
| 0.44775 | 0.81398 | 0.37313 | 0.79614 | 0.37312 | 1.10532 | 0.37312 | 1.51154 |
| 0.44786 | 0.81434 | 0.37323 | 0.7965  | 0.37322 | 1.10559 | 0.37322 | 1.51226 |
| 0.44797 | 0.81452 | 0.37332 | 0.79668 | 0.37331 | 1.10577 | 0.37331 | 1.51272 |
| 0.44808 | 0.81489 | 0.37341 | 0.79722 | 0.37341 | 1.10605 | 0.37341 | 1.513   |
| 0.44819 | 0.81507 | 0.3735  | 0.79768 | 0.37349 | 1.10642 | 0.37349 | 1.51345 |
| 0.4483  | 0.81525 | 0.37359 | 0.79804 | 0.37359 | 1.10668 | 0.37359 | 1.51454 |
| 0.44841 | 0.81561 | 0.37369 | 0.79859 | 0.37368 | 1.10687 | 0.37368 | 1.51499 |
| 0.44853 | 0.81589 | 0.37378 | 0.79932 | 0.37377 | 1.10759 | 0.37377 | 1.51463 |
| 0.44863 | 0.81607 | 0.37387 | 0.79969 | 0.37387 | 1.10759 | 0.37387 | 1.51526 |
| 0.44875 | 0.81607 | 0.37396 | 0.79996 | 0.37396 | 1.10824 | 0.37396 | 1.51609 |
| 0.44885 | 0.8167  | 0.37406 | 0.80032 | 0.37405 | 1.1086  | 0.37405 | 1.51681 |
| 0.44897 | 0.81689 | 0.37416 | 0.80051 | 0.37414 | 1.10887 | 0.37415 | 1.51754 |
| 0.44908 | 0.81707 | 0.37424 | 0.80077 | 0.37424 | 1.10942 | 0.37424 | 1.51754 |
| 0.44919 | 0.81734 | 0.37434 | 0.80123 | 0.37433 | 1.10942 | 0.37433 | 1.51772 |
| 0.4493  | 0.81744 | 0.37443 | 0.80187 | 0.37442 | 1.1096  | 0.37442 | 1.51836 |
| 0.44941 | 0.81789 | 0.37452 | 0.80224 | 0.37452 | 1.11023 | 0.37452 | 1.519   |
| 0.44953 | 0.81825 | 0.37461 | 0.80278 | 0.3746  | 1.11042 | 0.3746  | 1.51945 |
| 0.44963 | 0.81825 | 0.37471 | 0.80314 | 0.3747  | 1.11069 | 0.3747  | 1.52046 |
| 0.44975 | 0.81862 | 0.3748  | 0.80332 | 0.37479 | 1.11097 | 0.37479 | 1.52064 |
| 0.44986 | 0.81907 | 0.37489 | 0.80351 | 0.37488 | 1.11115 | 0.37488 | 1.52064 |
| 0.44997 | 0.81925 | 0.37499 | 0.80423 | 0.37497 | 1.11178 | 0.37498 | 1.52173 |
| 0.45008 | 0.81944 | 0.37507 | 0.80469 | 0.37507 | 1.11233 | 0.37507 | 1.52173 |
| 0.45019 | 0.81971 | 0.37517 | 0.80524 | 0.37516 | 1.11242 | 0.37516 | 1.52227 |
| 0.4503  | 0.82008 | 0.37526 | 0.8056  | 0.37525 | 1.11269 | 0.37526 | 1.52273 |
| 0.45041 | 0.82016 | 0.37536 | 0.80579 | 0.37535 | 1.11306 | 0.37535 | 1.5231  |

|         |         |         |         |         |         |         |         |
|---------|---------|---------|---------|---------|---------|---------|---------|
| 0.45052 | 0.82062 | 0.37545 | 0.80606 | 0.37544 | 1.11333 | 0.37544 | 1.52373 |
| 0.45064 | 0.82089 | 0.37554 | 0.8066  | 0.37553 | 1.11379 | 0.37553 | 1.52464 |
| 0.45075 | 0.82117 | 0.37563 | 0.80705 | 0.37562 | 1.11424 | 0.37563 | 1.52491 |
| 0.45086 | 0.82153 | 0.37572 | 0.8076  | 0.37572 | 1.11451 | 0.37572 | 1.52519 |
| 0.45097 | 0.82181 | 0.37582 | 0.80778 | 0.37581 | 1.11506 | 0.37581 | 1.52509 |
| 0.45108 | 0.82208 | 0.37591 | 0.80806 | 0.3759  | 1.11497 | 0.37591 | 1.52519 |
| 0.45119 | 0.82262 | 0.376   | 0.80824 | 0.376   | 1.1156  | 0.376   | 1.52565 |
| 0.4513  | 0.82289 | 0.3761  | 0.80852 | 0.37609 | 1.1157  | 0.37609 | 1.52647 |
| 0.45142 | 0.82262 | 0.37619 | 0.80924 | 0.37618 | 1.11634 | 0.37618 | 1.52701 |
| 0.45152 | 0.82298 | 0.37628 | 0.80988 | 0.37627 | 1.11642 | 0.37627 | 1.5271  |
| 0.45164 | 0.82344 | 0.37637 | 0.81006 | 0.37636 | 1.11661 | 0.37636 | 1.52773 |
| 0.45174 | 0.82353 | 0.37647 | 0.8107  | 0.37646 | 1.11688 | 0.37646 | 1.52846 |
| 0.45186 | 0.8239  | 0.37655 | 0.81079 | 0.37655 | 1.11743 | 0.37655 | 1.52865 |
| 0.45197 | 0.82435 | 0.37665 | 0.81097 | 0.37664 | 1.1177  | 0.37664 | 1.52901 |
| 0.45208 | 0.82454 | 0.37675 | 0.81115 | 0.37673 | 1.11843 | 0.37674 | 1.52992 |
| 0.45219 | 0.82463 | 0.37683 | 0.8117  | 0.37683 | 1.11843 | 0.37683 | 1.53029 |
| 0.4523  | 0.8249  | 0.37693 | 0.81188 | 0.37692 | 1.11898 | 0.37692 | 1.53102 |
| 0.45241 | 0.82508 | 0.37702 | 0.81234 | 0.37701 | 1.11961 | 0.37701 | 1.53129 |
| 0.45252 | 0.82553 | 0.37712 | 0.81288 | 0.37711 | 1.1197  | 0.37711 | 1.53174 |
| 0.45264 | 0.82572 | 0.37721 | 0.81324 | 0.3772  | 1.12016 | 0.3772  | 1.53238 |
| 0.45274 | 0.82599 | 0.3773  | 0.81361 | 0.37729 | 1.12043 | 0.37729 | 1.53247 |
| 0.45286 | 0.82626 | 0.37739 | 0.81379 | 0.37738 | 1.12034 | 0.37739 | 1.53329 |
| 0.45297 | 0.82653 | 0.37748 | 0.81406 | 0.37747 | 1.12071 | 0.37747 | 1.53384 |
| 0.45308 | 0.82662 | 0.37758 | 0.8147  | 0.37757 | 1.12134 | 0.37757 | 1.53411 |
| 0.45319 | 0.82727 | 0.37767 | 0.81543 | 0.37766 | 1.12125 | 0.37766 | 1.53466 |
| 0.4533  | 0.82745 | 0.37776 | 0.81543 | 0.37776 | 1.12143 | 0.37776 | 1.53511 |
| 0.45341 | 0.82753 | 0.37786 | 0.8158  | 0.37784 | 1.12198 | 0.37785 | 1.53566 |
| 0.45353 | 0.82799 | 0.37795 | 0.81634 | 0.37794 | 1.12226 | 0.37794 | 1.5362  |
| 0.45363 | 0.82854 | 0.37804 | 0.81689 | 0.37803 | 1.12289 | 0.37803 | 1.53729 |
| 0.45375 | 0.82836 | 0.37813 | 0.81707 | 0.37812 | 1.12335 | 0.37812 | 1.53747 |
| 0.45385 | 0.82863 | 0.37823 | 0.81734 | 0.37822 | 1.12353 | 0.37822 | 1.53848 |
| 0.45397 | 0.8289  | 0.37832 | 0.81788 | 0.37831 | 1.12353 | 0.37831 | 1.53902 |
| 0.45408 | 0.82917 | 0.37841 | 0.81844 | 0.3784  | 1.12398 | 0.3784  | 1.53856 |
| 0.45419 | 0.82963 | 0.3785  | 0.81889 | 0.37849 | 1.12453 | 0.3785  | 1.53957 |
| 0.4543  | 0.83    | 0.37859 | 0.81925 | 0.37859 | 1.1248  | 0.37859 | 1.54048 |
| 0.45441 | 0.83027 | 0.37869 | 0.81953 | 0.37868 | 1.12516 | 0.37868 | 1.54057 |
| 0.45453 | 0.83063 | 0.37878 | 0.81998 | 0.37877 | 1.12553 | 0.37877 | 1.54076 |
| 0.45463 | 0.83082 | 0.37887 | 0.82052 | 0.37887 | 1.12544 | 0.37887 | 1.5413  |
| 0.45475 | 0.83099 | 0.37897 | 0.82099 | 0.37896 | 1.12608 | 0.37896 | 1.54203 |
| 0.45486 | 0.83154 | 0.37906 | 0.82125 | 0.37905 | 1.12635 | 0.37905 | 1.54221 |
| 0.45497 | 0.83163 | 0.37915 | 0.82135 | 0.37914 | 1.12653 | 0.37915 | 1.54294 |
| 0.45508 | 0.83173 | 0.37924 | 0.8218  | 0.37923 | 1.12671 | 0.37923 | 1.54366 |
| 0.45519 | 0.83218 | 0.37934 | 0.82226 | 0.37933 | 1.1269  | 0.37933 | 1.54421 |
| 0.4553  | 0.83254 | 0.37943 | 0.82271 | 0.37942 | 1.12716 | 0.37942 | 1.54494 |
| 0.45541 | 0.83291 | 0.37952 | 0.82316 | 0.37952 | 1.1278  | 0.37952 | 1.54503 |
| 0.45552 | 0.83318 | 0.37962 | 0.82326 | 0.3796  | 1.12799 | 0.37961 | 1.54531 |
| 0.45564 | 0.83336 | 0.37971 | 0.8239  | 0.3797  | 1.12835 | 0.3797  | 1.54594 |
| 0.45575 | 0.83372 | 0.3798  | 0.82426 | 0.37979 | 1.12889 | 0.37979 | 1.54658 |
| 0.45586 | 0.83391 | 0.37989 | 0.82444 | 0.37988 | 1.12917 | 0.37988 | 1.54703 |
| 0.45597 | 0.834   | 0.37999 | 0.82453 | 0.37998 | 1.12944 | 0.37998 | 1.5474  |
| 0.45608 | 0.83418 | 0.38007 | 0.82544 | 0.38007 | 1.12989 | 0.38007 | 1.54758 |
| 0.45619 | 0.83454 | 0.38017 | 0.82553 | 0.38016 | 1.13008 | 0.38016 | 1.5483  |
| 0.4563  | 0.83482 | 0.38026 | 0.82581 | 0.38025 | 1.13035 | 0.38026 | 1.54858 |
| 0.45642 | 0.83509 | 0.38035 | 0.82617 | 0.38035 | 1.1308  | 0.38035 | 1.54922 |

|         |         |         |         |         |         |         |         |
|---------|---------|---------|---------|---------|---------|---------|---------|
| 0.45652 | 0.83527 | 0.38045 | 0.82653 | 0.38044 | 1.13154 | 0.38044 | 1.54976 |
| 0.45664 | 0.83573 | 0.38054 | 0.82699 | 0.38053 | 1.13162 | 0.38053 | 1.5504  |
| 0.45674 | 0.83591 | 0.38063 | 0.82727 | 0.38063 | 1.13181 | 0.38063 | 1.55031 |
| 0.45686 | 0.83636 | 0.38073 | 0.82781 | 0.38072 | 1.13199 | 0.38072 | 1.55076 |
| 0.45696 | 0.83682 | 0.38082 | 0.82808 | 0.38081 | 1.13244 | 0.38081 | 1.55167 |
| 0.45708 | 0.83719 | 0.38091 | 0.82854 | 0.3809  | 1.13318 | 0.38091 | 1.55158 |
| 0.45719 | 0.83737 | 0.381   | 0.82881 | 0.381   | 1.13345 | 0.381   | 1.55204 |
| 0.4573  | 0.83746 | 0.3811  | 0.82936 | 0.38109 | 1.13372 | 0.38109 | 1.55286 |
| 0.45741 | 0.83755 | 0.38119 | 0.8299  | 0.38118 | 1.13372 | 0.38118 | 1.55286 |
| 0.45752 | 0.83819 | 0.38128 | 0.83026 | 0.38128 | 1.13418 | 0.38127 | 1.55359 |
| 0.45764 | 0.83837 | 0.38138 | 0.83054 | 0.38136 | 1.13445 | 0.38137 | 1.55449 |
| 0.45775 | 0.83846 | 0.38146 | 0.83099 | 0.38146 | 1.13463 | 0.38146 | 1.55486 |
| 0.45786 | 0.83891 | 0.38156 | 0.83145 | 0.38155 | 1.13536 | 0.38155 | 1.55532 |
| 0.45797 | 0.83909 | 0.38165 | 0.83191 | 0.38164 | 1.13545 | 0.38164 | 1.5555  |
| 0.45808 | 0.83918 | 0.38174 | 0.83209 | 0.38174 | 1.13609 | 0.38174 | 1.5555  |
| 0.45819 | 0.83955 | 0.38184 | 0.83236 | 0.38183 | 1.13636 | 0.38183 | 1.55641 |
| 0.4583  | 0.84    | 0.38193 | 0.83272 | 0.38192 | 1.13663 | 0.38192 | 1.55695 |
| 0.45841 | 0.84028 | 0.38203 | 0.83299 | 0.38201 | 1.137   | 0.38202 | 1.55722 |
| 0.45853 | 0.84009 | 0.38211 | 0.83336 | 0.38211 | 1.13718 | 0.38211 | 1.55805 |
| 0.45863 | 0.84065 | 0.38221 | 0.8339  | 0.38219 | 1.13736 | 0.3822  | 1.55878 |
| 0.45875 | 0.84074 | 0.3823  | 0.83436 | 0.38229 | 1.13781 | 0.38229 | 1.55895 |
| 0.45885 | 0.84092 | 0.38239 | 0.83464 | 0.38239 | 1.13809 | 0.38239 | 1.55959 |
| 0.45897 | 0.84128 | 0.38249 | 0.83536 | 0.38248 | 1.13855 | 0.38248 | 1.56032 |
| 0.45908 | 0.84165 | 0.38258 | 0.83564 | 0.38257 | 1.13891 | 0.38257 | 1.56041 |
| 0.45919 | 0.84183 | 0.38267 | 0.83591 | 0.38266 | 1.13927 | 0.38267 | 1.56123 |
| 0.4593  | 0.8421  | 0.38276 | 0.83618 | 0.38275 | 1.13954 | 0.38275 | 1.56159 |
| 0.45941 | 0.84255 | 0.38286 | 0.83682 | 0.38285 | 1.14    | 0.38285 | 1.56205 |
| 0.45953 | 0.84301 | 0.38294 | 0.83737 | 0.38294 | 1.14018 | 0.38294 | 1.56278 |
| 0.45963 | 0.84329 | 0.38304 | 0.83764 | 0.38303 | 1.14037 | 0.38303 | 1.56333 |
| 0.45975 | 0.84355 | 0.38314 | 0.83791 | 0.38312 | 1.141   | 0.38313 | 1.56333 |
| 0.45986 | 0.84383 | 0.38322 | 0.83855 | 0.38322 | 1.14136 | 0.38322 | 1.56405 |
| 0.45997 | 0.84392 | 0.38332 | 0.83864 | 0.38331 | 1.14173 | 0.38331 | 1.56478 |
| 0.46008 | 0.8441  | 0.38341 | 0.83873 | 0.3834  | 1.1421  | 0.3834  | 1.56515 |
| 0.46019 | 0.84438 | 0.3835  | 0.83928 | 0.3835  | 1.142   | 0.3835  | 1.56587 |
| 0.4603  | 0.84474 | 0.38359 | 0.83964 | 0.38359 | 1.14245 | 0.38359 | 1.56678 |
| 0.46041 | 0.84492 | 0.38369 | 0.84009 | 0.38368 | 1.14273 | 0.38368 | 1.56687 |
| 0.46052 | 0.84547 | 0.38378 | 0.84028 | 0.38377 | 1.1431  | 0.38378 | 1.56742 |
| 0.46064 | 0.84547 | 0.38387 | 0.84055 | 0.38386 | 1.14319 | 0.38386 | 1.56787 |
| 0.46075 | 0.84583 | 0.38397 | 0.84092 | 0.38396 | 1.14337 | 0.38396 | 1.56842 |
| 0.46086 | 0.84628 | 0.38406 | 0.84137 | 0.38405 | 1.14346 | 0.38405 | 1.56861 |
| 0.46097 | 0.84647 | 0.38415 | 0.84155 | 0.38414 | 1.14401 | 0.38414 | 1.56897 |
| 0.46108 | 0.84647 | 0.38425 | 0.84191 | 0.38423 | 1.14446 | 0.38424 | 1.56933 |
| 0.46119 | 0.84683 | 0.38434 | 0.84255 | 0.38433 | 1.14428 | 0.38433 | 1.56997 |
| 0.4613  | 0.84729 | 0.38443 | 0.84292 | 0.38442 | 1.14455 | 0.38443 | 1.57034 |
| 0.46142 | 0.84765 | 0.38452 | 0.84319 | 0.38451 | 1.145   | 0.38451 | 1.5706  |
| 0.46152 | 0.84793 | 0.38462 | 0.84328 | 0.38461 | 1.145   | 0.38461 | 1.57161 |
| 0.46164 | 0.84829 | 0.3847  | 0.84365 | 0.3847  | 1.14556 | 0.3847  | 1.57252 |
| 0.46174 | 0.84874 | 0.3848  | 0.8442  | 0.38479 | 1.14573 | 0.38479 | 1.5727  |
| 0.46186 | 0.84911 | 0.38489 | 0.84464 | 0.38488 | 1.14573 | 0.38489 | 1.57288 |
| 0.46197 | 0.84911 | 0.38498 | 0.84492 | 0.38498 | 1.14619 | 0.38498 | 1.57388 |
| 0.46208 | 0.84929 | 0.38508 | 0.84519 | 0.38507 | 1.14674 | 0.38507 | 1.57415 |
| 0.46219 | 0.84957 | 0.38517 | 0.84556 | 0.38516 | 1.14692 | 0.38516 | 1.57461 |
| 0.4623  | 0.84974 | 0.38526 | 0.84583 | 0.38526 | 1.14719 | 0.38526 | 1.57525 |
| 0.46241 | 0.84992 | 0.38536 | 0.8461  | 0.38534 | 1.14764 | 0.38534 | 1.57525 |

|         |         |         |         |         |         |         |         |
|---------|---------|---------|---------|---------|---------|---------|---------|
| 0.46252 | 0.8502  | 0.38545 | 0.84646 | 0.38544 | 1.14838 | 0.38544 | 1.5757  |
| 0.46264 | 0.85029 | 0.38554 | 0.84693 | 0.38553 | 1.14883 | 0.38554 | 1.57652 |
| 0.46275 | 0.85056 | 0.38563 | 0.84729 | 0.38563 | 1.14919 | 0.38563 | 1.57744 |
| 0.46286 | 0.85066 | 0.38573 | 0.84738 | 0.38571 | 1.14947 | 0.38572 | 1.57835 |
| 0.46297 | 0.85093 | 0.38582 | 0.84774 | 0.38581 | 1.14983 | 0.38581 | 1.57871 |
| 0.46308 | 0.85129 | 0.38591 | 0.8482  | 0.3859  | 1.15001 | 0.3859  | 1.57907 |
| 0.46319 | 0.85184 | 0.38601 | 0.84892 | 0.38599 | 1.15029 | 0.386   | 1.57961 |
| 0.4633  | 0.85193 | 0.3861  | 0.84947 | 0.38609 | 1.15074 | 0.38609 | 1.58008 |
| 0.46341 | 0.8522  | 0.38619 | 0.84974 | 0.38618 | 1.15183 | 0.38618 | 1.58071 |
| 0.46353 | 0.85265 | 0.38628 | 0.84992 | 0.38627 | 1.15219 | 0.38627 | 1.58062 |
| 0.46363 | 0.85303 | 0.38637 | 0.8502  | 0.38637 | 1.15219 | 0.38637 | 1.58116 |
| 0.46375 | 0.85321 | 0.38646 | 0.85074 | 0.38646 | 1.15284 | 0.38646 | 1.58171 |
| 0.46385 | 0.85339 | 0.38656 | 0.8512  | 0.38655 | 1.1532  | 0.38655 | 1.58207 |
| 0.46397 | 0.85366 | 0.38665 | 0.85148 | 0.38664 | 1.1531  | 0.38665 | 1.58262 |
| 0.46408 | 0.85394 | 0.38674 | 0.85193 | 0.38674 | 1.15329 | 0.38674 | 1.58253 |
| 0.46419 | 0.85421 | 0.38684 | 0.8522  | 0.38683 | 1.15347 | 0.38683 | 1.58316 |
| 0.4643  | 0.85438 | 0.38693 | 0.85247 | 0.38692 | 1.15347 | 0.38692 | 1.58362 |
| 0.46441 | 0.8543  | 0.38702 | 0.85302 | 0.38702 | 1.15365 | 0.38702 | 1.58398 |
| 0.46453 | 0.85457 | 0.38711 | 0.85348 | 0.3871  | 1.15429 | 0.3871  | 1.58463 |
| 0.46463 | 0.85493 | 0.38721 | 0.85384 | 0.3872  | 1.15474 | 0.3872  | 1.58526 |
| 0.46475 | 0.85511 | 0.3873  | 0.85402 | 0.38729 | 1.15511 | 0.3873  | 1.58572 |
| 0.46486 | 0.8553  | 0.38739 | 0.85438 | 0.38739 | 1.15538 | 0.38739 | 1.58599 |
| 0.46497 | 0.85593 | 0.38749 | 0.85493 | 0.38747 | 1.15566 | 0.38748 | 1.58671 |
| 0.46508 | 0.85621 | 0.38758 | 0.85503 | 0.38757 | 1.15602 | 0.38757 | 1.58717 |
| 0.46519 | 0.85666 | 0.38767 | 0.85539 | 0.38766 | 1.15684 | 0.38766 | 1.58781 |
| 0.4653  | 0.85703 | 0.38776 | 0.85548 | 0.38775 | 1.1572  | 0.38776 | 1.58845 |
| 0.46541 | 0.8573  | 0.38786 | 0.85611 | 0.38785 | 1.15766 | 0.38785 | 1.5889  |
| 0.46552 | 0.85767 | 0.38795 | 0.85657 | 0.38794 | 1.15793 | 0.38794 | 1.58954 |
| 0.46564 | 0.85793 | 0.38804 | 0.85694 | 0.38803 | 1.15812 | 0.38803 | 1.59027 |
| 0.46575 | 0.85793 | 0.38813 | 0.85739 | 0.38813 | 1.15866 | 0.38813 | 1.59054 |
| 0.46586 | 0.85821 | 0.38822 | 0.85793 | 0.38822 | 1.15884 | 0.38822 | 1.59099 |
| 0.46597 | 0.8583  | 0.38832 | 0.85793 | 0.38831 | 1.15866 | 0.38831 | 1.5919  |
| 0.46608 | 0.85875 | 0.38841 | 0.8583  | 0.3884  | 1.15911 | 0.38841 | 1.59181 |
| 0.46619 | 0.85894 | 0.3885  | 0.85884 | 0.3885  | 1.15975 | 0.38849 | 1.59245 |
| 0.4663  | 0.85912 | 0.3886  | 0.8593  | 0.38859 | 1.16003 | 0.38859 | 1.59336 |
| 0.46642 | 0.8594  | 0.38869 | 0.8594  | 0.38868 | 1.16066 | 0.38868 | 1.59364 |
| 0.46652 | 0.85957 | 0.38878 | 0.85984 | 0.38877 | 1.16075 | 0.38877 | 1.59427 |
| 0.46664 | 0.86012 | 0.38887 | 0.86021 | 0.38886 | 1.16121 | 0.38886 | 1.59445 |
| 0.46674 | 0.8604  | 0.38897 | 0.86049 | 0.38896 | 1.16166 | 0.38896 | 1.59491 |
| 0.46686 | 0.86067 | 0.38906 | 0.86085 | 0.38905 | 1.16193 | 0.38906 | 1.59555 |
| 0.46697 | 0.86076 | 0.38915 | 0.86121 | 0.38914 | 1.16193 | 0.38914 | 1.59645 |
| 0.46708 | 0.86085 | 0.38925 | 0.86176 | 0.38923 | 1.16248 | 0.38924 | 1.59654 |
| 0.46719 | 0.86139 | 0.38934 | 0.86194 | 0.38933 | 1.16267 | 0.38933 | 1.59728 |
| 0.4673  | 0.86194 | 0.38943 | 0.86249 | 0.38942 | 1.16276 | 0.38942 | 1.59773 |
| 0.46741 | 0.86213 | 0.38952 | 0.86285 | 0.38951 | 1.16366 | 0.38951 | 1.59782 |
| 0.46752 | 0.86249 | 0.38962 | 0.86285 | 0.38961 | 1.16375 | 0.38961 | 1.59891 |
| 0.46764 | 0.86267 | 0.38971 | 0.86339 | 0.3897  | 1.16412 | 0.3897  | 1.59918 |
| 0.46775 | 0.86258 | 0.3898  | 0.86376 | 0.38979 | 1.16457 | 0.38979 | 1.59946 |
| 0.46786 | 0.86295 | 0.38989 | 0.86404 | 0.38989 | 1.16503 | 0.38989 | 1.59991 |
| 0.46797 | 0.8633  | 0.38998 | 0.8644  | 0.38997 | 1.16531 | 0.38997 | 1.60082 |
| 0.46808 | 0.86358 | 0.39008 | 0.86467 | 0.39007 | 1.16585 | 0.39007 | 1.60092 |
| 0.46819 | 0.86386 | 0.39017 | 0.86513 | 0.39016 | 1.16585 | 0.39016 | 1.60146 |
| 0.46831 | 0.86404 | 0.39026 | 0.8654  | 0.39026 | 1.16612 | 0.39026 | 1.60219 |
| 0.46841 | 0.86431 | 0.39036 | 0.86558 | 0.39034 | 1.16657 | 0.39035 | 1.60247 |

|         |         |         |         |         |         |         |         |
|---------|---------|---------|---------|---------|---------|---------|---------|
| 0.46853 | 0.86494 | 0.39045 | 0.86595 | 0.39044 | 1.16703 | 0.39044 | 1.6031  |
| 0.46863 | 0.86513 | 0.39054 | 0.8664  | 0.39053 | 1.16712 | 0.39053 | 1.60401 |
| 0.46875 | 0.86549 | 0.39063 | 0.86677 | 0.39062 | 1.16767 | 0.39062 | 1.6041  |
| 0.46885 | 0.86585 | 0.39073 | 0.86731 | 0.39072 | 1.16795 | 0.39072 | 1.60419 |
| 0.46897 | 0.86622 | 0.39082 | 0.86759 | 0.39081 | 1.16813 | 0.39082 | 1.6051  |
| 0.46908 | 0.86622 | 0.39091 | 0.86777 | 0.3909  | 1.16839 | 0.3909  | 1.60574 |
| 0.46919 | 0.86658 | 0.39101 | 0.86858 | 0.39099 | 1.16885 | 0.391   | 1.60592 |
| 0.4693  | 0.86677 | 0.3911  | 0.86886 | 0.39109 | 1.16921 | 0.39109 | 1.60628 |
| 0.46941 | 0.86677 | 0.39119 | 0.86913 | 0.39118 | 1.16958 | 0.39118 | 1.60702 |
| 0.46953 | 0.86704 | 0.39128 | 0.86941 | 0.39127 | 1.16967 | 0.39127 | 1.6081  |
| 0.46963 | 0.8675  | 0.39137 | 0.86958 | 0.39137 | 1.17022 | 0.39137 | 1.60838 |
| 0.46975 | 0.86777 | 0.39147 | 0.86986 | 0.39146 | 1.17086 | 0.39146 | 1.60847 |
| 0.46986 | 0.86786 | 0.39156 | 0.8704  | 0.39155 | 1.17086 | 0.39155 | 1.6092  |
| 0.46997 | 0.86813 | 0.39165 | 0.87086 | 0.39165 | 1.17122 | 0.39165 | 1.60966 |
| 0.47008 | 0.86841 | 0.39174 | 0.87132 | 0.39173 | 1.1714  | 0.39173 | 1.61047 |
| 0.47019 | 0.86858 | 0.39184 | 0.87177 | 0.39183 | 1.17194 | 0.39183 | 1.61083 |
| 0.4703  | 0.86877 | 0.39193 | 0.87204 | 0.39192 | 1.17241 | 0.39193 | 1.61165 |
| 0.47041 | 0.86904 | 0.39202 | 0.87223 | 0.39201 | 1.17268 | 0.39201 | 1.61211 |
| 0.47052 | 0.86941 | 0.39212 | 0.87259 | 0.3921  | 1.17241 | 0.39211 | 1.6122  |
| 0.47064 | 0.86977 | 0.39221 | 0.87296 | 0.3922  | 1.17259 | 0.3922  | 1.61266 |
| 0.47075 | 0.86995 | 0.3923  | 0.87332 | 0.3923  | 1.17295 | 0.3923  | 1.61329 |
| 0.47086 | 0.8704  | 0.39239 | 0.87359 | 0.39238 | 1.17331 | 0.39238 | 1.61402 |
| 0.47097 | 0.8705  | 0.39248 | 0.87405 | 0.39248 | 1.17359 | 0.39248 | 1.61457 |
| 0.47108 | 0.87059 | 0.39258 | 0.87441 | 0.39257 | 1.17395 | 0.39257 | 1.61484 |
| 0.4712  | 0.87122 | 0.39267 | 0.87486 | 0.39266 | 1.17422 | 0.39266 | 1.61503 |
| 0.4713  | 0.87168 | 0.39277 | 0.87523 | 0.39275 | 1.17477 | 0.39276 | 1.61557 |
| 0.47142 | 0.87213 | 0.39285 | 0.87523 | 0.39285 | 1.17523 | 0.39285 | 1.61584 |
| 0.47152 | 0.87204 | 0.39295 | 0.87559 | 0.39294 | 1.1755  | 0.39294 | 1.61657 |
| 0.47164 | 0.87241 | 0.39304 | 0.87586 | 0.39303 | 1.17568 | 0.39303 | 1.61721 |
| 0.47174 | 0.8725  | 0.39313 | 0.87596 | 0.39313 | 1.17595 | 0.39313 | 1.61739 |
| 0.47186 | 0.87305 | 0.39323 | 0.87641 | 0.39321 | 1.17622 | 0.39322 | 1.61793 |
| 0.47197 | 0.87359 | 0.39332 | 0.87687 | 0.39331 | 1.17668 | 0.39331 | 1.61866 |
| 0.47208 | 0.8735  | 0.39341 | 0.87714 | 0.39341 | 1.17713 | 0.3934  | 1.61893 |
| 0.47219 | 0.87386 | 0.3935  | 0.8776  | 0.39349 | 1.17741 | 0.39349 | 1.61949 |
| 0.4723  | 0.87386 | 0.3936  | 0.87805 | 0.39359 | 1.17759 | 0.39359 | 1.61994 |
| 0.47241 | 0.87432 | 0.39368 | 0.87823 | 0.39368 | 1.17823 | 0.39368 | 1.62049 |
| 0.47252 | 0.87496 | 0.39378 | 0.87842 | 0.39377 | 1.1785  | 0.39377 | 1.62085 |
| 0.47264 | 0.87505 | 0.39388 | 0.87887 | 0.39386 | 1.17841 | 0.39387 | 1.62157 |
| 0.47274 | 0.87532 | 0.39397 | 0.87932 | 0.39396 | 1.17878 | 0.39396 | 1.62157 |
| 0.47286 | 0.87569 | 0.39406 | 0.87969 | 0.39405 | 1.17895 | 0.39405 | 1.62185 |
| 0.47297 | 0.87605 | 0.39415 | 0.87996 | 0.39414 | 1.17914 | 0.39414 | 1.62249 |
| 0.47308 | 0.87596 | 0.39424 | 0.87996 | 0.39424 | 1.17941 | 0.39424 | 1.62303 |
| 0.47319 | 0.87623 | 0.39434 | 0.88042 | 0.39433 | 1.18005 | 0.39433 | 1.62394 |
| 0.4733  | 0.87659 | 0.39443 | 0.88087 | 0.39442 | 1.18041 | 0.39442 | 1.62431 |
| 0.47341 | 0.87678 | 0.39453 | 0.88124 | 0.39451 | 1.18069 | 0.39452 | 1.62467 |
| 0.47353 | 0.87714 | 0.39461 | 0.88151 | 0.39461 | 1.18123 | 0.39461 | 1.62513 |
| 0.47363 | 0.87741 | 0.39471 | 0.88178 | 0.3947  | 1.18132 | 0.3947  | 1.62576 |
| 0.47375 | 0.87787 | 0.3948  | 0.88242 | 0.39479 | 1.18168 | 0.39479 | 1.62613 |
| 0.47385 | 0.87832 | 0.39489 | 0.88287 | 0.39488 | 1.18196 | 0.39488 | 1.62677 |
| 0.47397 | 0.8786  | 0.39499 | 0.88279 | 0.39497 | 1.18233 | 0.39498 | 1.62804 |
| 0.47408 | 0.87878 | 0.39508 | 0.88306 | 0.39507 | 1.18305 | 0.39507 | 1.62831 |
| 0.47419 | 0.87915 | 0.39517 | 0.88342 | 0.39516 | 1.18305 | 0.39516 | 1.62841 |
| 0.4743  | 0.87969 | 0.39526 | 0.88388 | 0.39525 | 1.18323 | 0.39525 | 1.62922 |
| 0.47441 | 0.87988 | 0.39536 | 0.88451 | 0.39535 | 1.18378 | 0.39535 | 1.6295  |

|         |         |         |         |         |         |         |         |
|---------|---------|---------|---------|---------|---------|---------|---------|
| 0.47453 | 0.88014 | 0.39544 | 0.88478 | 0.39544 | 1.18414 | 0.39544 | 1.62986 |
| 0.47463 | 0.88051 | 0.39554 | 0.88497 | 0.39553 | 1.18423 | 0.39553 | 1.63059 |
| 0.47475 | 0.88069 | 0.39564 | 0.88515 | 0.39562 | 1.18441 | 0.39563 | 1.63131 |
| 0.47486 | 0.88133 | 0.39573 | 0.8856  | 0.39572 | 1.18506 | 0.39572 | 1.63186 |
| 0.47497 | 0.88124 | 0.39582 | 0.88588 | 0.39581 | 1.18533 | 0.39581 | 1.63268 |
| 0.47508 | 0.88161 | 0.39591 | 0.88625 | 0.3959  | 1.18579 | 0.3959  | 1.63296 |
| 0.47519 | 0.88197 | 0.39601 | 0.88634 | 0.396   | 1.18624 | 0.396   | 1.63386 |
| 0.4753  | 0.88233 | 0.3961  | 0.8867  | 0.39609 | 1.18669 | 0.39609 | 1.63423 |
| 0.47541 | 0.8826  | 0.39619 | 0.88697 | 0.39618 | 1.18651 | 0.39618 | 1.63478 |
| 0.47552 | 0.88287 | 0.39628 | 0.88734 | 0.39627 | 1.18696 | 0.39628 | 1.63532 |
| 0.47564 | 0.88315 | 0.39637 | 0.8877  | 0.39637 | 1.18733 | 0.39637 | 1.6355  |
| 0.47575 | 0.88333 | 0.39647 | 0.88797 | 0.39646 | 1.1877  | 0.39646 | 1.63568 |
| 0.47586 | 0.88388 | 0.39656 | 0.88833 | 0.39655 | 1.18806 | 0.39655 | 1.63632 |
| 0.47597 | 0.88451 | 0.39665 | 0.8887  | 0.39664 | 1.18861 | 0.39664 | 1.63669 |
| 0.47608 | 0.8847  | 0.39675 | 0.88898 | 0.39673 | 1.18888 | 0.39673 | 1.63714 |
| 0.4762  | 0.8847  | 0.39684 | 0.88907 | 0.39683 | 1.18906 | 0.39683 | 1.63778 |
| 0.4763  | 0.88524 | 0.39693 | 0.88961 | 0.39692 | 1.18979 | 0.39693 | 1.63859 |
| 0.47642 | 0.8856  | 0.39702 | 0.89016 | 0.39701 | 1.19015 | 0.39701 | 1.63905 |
| 0.47652 | 0.88597 | 0.39712 | 0.89052 | 0.39711 | 1.1906  | 0.39711 | 1.63978 |
| 0.47664 | 0.88597 | 0.3972  | 0.89088 | 0.3972  | 1.19106 | 0.3972  | 1.63978 |
| 0.47674 | 0.88625 | 0.3973  | 0.89125 | 0.39729 | 1.19115 | 0.39729 | 1.64033 |
| 0.47686 | 0.88679 | 0.3974  | 0.8918  | 0.39738 | 1.19151 | 0.39739 | 1.64078 |
| 0.47697 | 0.88688 | 0.39748 | 0.89207 | 0.39748 | 1.19161 | 0.39748 | 1.64151 |
| 0.47708 | 0.88724 | 0.39758 | 0.89234 | 0.39757 | 1.19216 | 0.39757 | 1.6416  |
| 0.47719 | 0.88779 | 0.39767 | 0.8928  | 0.39766 | 1.1927  | 0.39766 | 1.64224 |
| 0.4773  | 0.88797 | 0.39776 | 0.89307 | 0.39776 | 1.19316 | 0.39776 | 1.64279 |
| 0.47741 | 0.88834 | 0.39786 | 0.89362 | 0.39785 | 1.19361 | 0.39785 | 1.64324 |
| 0.47752 | 0.88834 | 0.39795 | 0.89353 | 0.39794 | 1.19397 | 0.39794 | 1.64388 |
| 0.47764 | 0.88861 | 0.39804 | 0.89389 | 0.39803 | 1.19443 | 0.39804 | 1.6447  |
| 0.47775 | 0.88915 | 0.39813 | 0.89443 | 0.39813 | 1.19452 | 0.39813 | 1.64487 |
| 0.47786 | 0.88943 | 0.39823 | 0.89498 | 0.39822 | 1.19516 | 0.39822 | 1.64606 |
| 0.47797 | 0.88961 | 0.39832 | 0.89553 | 0.39831 | 1.19516 | 0.39831 | 1.64688 |
| 0.47808 | 0.8898  | 0.39841 | 0.89562 | 0.3984  | 1.19552 | 0.3984  | 1.64724 |
| 0.47819 | 0.89007 | 0.39851 | 0.8958  | 0.39849 | 1.19543 | 0.3985  | 1.6477  |
| 0.4783  | 0.89025 | 0.3986  | 0.89598 | 0.39859 | 1.19579 | 0.39859 | 1.64815 |
| 0.47841 | 0.89062 | 0.39869 | 0.89616 | 0.39868 | 1.19589 | 0.39868 | 1.6487  |
| 0.47853 | 0.8907  | 0.39878 | 0.89662 | 0.39877 | 1.19625 | 0.39877 | 1.64897 |
| 0.47863 | 0.8907  | 0.39887 | 0.89717 | 0.39887 | 1.19661 | 0.39887 | 1.64979 |
| 0.47875 | 0.89116 | 0.39896 | 0.89753 | 0.39896 | 1.19679 | 0.39896 | 1.65079 |
| 0.47885 | 0.89161 | 0.39906 | 0.89807 | 0.39905 | 1.19688 | 0.39905 | 1.65079 |
| 0.47897 | 0.89171 | 0.39915 | 0.89835 | 0.39914 | 1.19744 | 0.39915 | 1.65125 |
| 0.47908 | 0.89188 | 0.39924 | 0.89862 | 0.39924 | 1.19771 | 0.39924 | 1.65234 |
| 0.47919 | 0.89198 | 0.39934 | 0.89917 | 0.39933 | 1.19834 | 0.39933 | 1.65334 |
| 0.4793  | 0.89234 | 0.39943 | 0.89917 | 0.39942 | 1.19852 | 0.39942 | 1.65361 |
| 0.47941 | 0.89307 | 0.39952 | 0.89971 | 0.39952 | 1.19871 | 0.39952 | 1.65407 |
| 0.47953 | 0.89335 | 0.39961 | 0.90026 | 0.39961 | 1.19925 | 0.39961 | 1.65435 |
| 0.47963 | 0.89362 | 0.39971 | 0.90026 | 0.3997  | 1.19952 | 0.3997  | 1.65444 |
| 0.47975 | 0.89389 | 0.3998  | 0.90062 | 0.39979 | 1.19962 | 0.3998  | 1.65498 |
| 0.47986 | 0.89425 | 0.39989 | 0.90108 | 0.39989 | 1.20026 | 0.39989 | 1.65516 |
| 0.47997 | 0.89461 | 0.39999 | 0.90162 | 0.39998 | 1.20108 | 0.39998 | 1.65571 |
| 0.48008 | 0.89443 | 0.40007 | 0.9018  | 0.40007 | 1.20134 | 0.40007 | 1.65608 |
| 0.48019 | 0.89489 | 0.40017 | 0.90199 | 0.40016 | 1.20171 | 0.40016 | 1.6568  |
| 0.4803  | 0.89526 | 0.40026 | 0.90244 | 0.40025 | 1.20189 | 0.40025 | 1.65743 |
| 0.48041 | 0.89543 | 0.40035 | 0.90299 | 0.40035 | 1.20271 | 0.40035 | 1.65734 |



|         |         |         |         |         |         |         |         |
|---------|---------|---------|---------|---------|---------|---------|---------|
| 0.48052 | 0.89571 | 0.40045 | 0.90326 | 0.40044 | 1.20307 | 0.40044 | 1.65807 |
| 0.48064 | 0.8958  | 0.40054 | 0.90345 | 0.40053 | 1.20326 | 0.40053 | 1.65853 |
| 0.48075 | 0.89608 | 0.40064 | 0.90372 | 0.40063 | 1.20335 | 0.40063 | 1.65926 |
| 0.48086 | 0.89635 | 0.40072 | 0.90408 | 0.40072 | 1.20389 | 0.40072 | 1.6598  |
| 0.48097 | 0.89671 | 0.40082 | 0.90427 | 0.40081 | 1.20444 | 0.40081 | 1.66062 |
| 0.48108 | 0.89717 | 0.40091 | 0.90444 | 0.4009  | 1.20499 | 0.40091 | 1.66135 |
| 0.48119 | 0.89735 | 0.401   | 0.9049  | 0.401   | 1.20535 | 0.401   | 1.6619  |
| 0.4813  | 0.89717 | 0.4011  | 0.90545 | 0.40109 | 1.2058  | 0.40109 | 1.66181 |
| 0.48142 | 0.89753 | 0.40119 | 0.90545 | 0.40118 | 1.20644 | 0.40118 | 1.66263 |
| 0.48152 | 0.89771 | 0.40128 | 0.90581 | 0.40128 | 1.20662 | 0.40128 | 1.66335 |
| 0.48164 | 0.89807 | 0.40137 | 0.90609 | 0.40137 | 1.2069  | 0.40137 | 1.66408 |
| 0.48174 | 0.89862 | 0.40147 | 0.90645 | 0.40146 | 1.20754 | 0.40146 | 1.66408 |
| 0.48186 | 0.89881 | 0.40155 | 0.90681 | 0.40155 | 1.20772 | 0.40155 | 1.66535 |
| 0.48197 | 0.89908 | 0.40165 | 0.90727 | 0.40164 | 1.2079  | 0.40164 | 1.66654 |
| 0.48208 | 0.89926 | 0.40175 | 0.90745 | 0.40174 | 1.20835 | 0.40174 | 1.66763 |
| 0.48219 | 0.89963 | 0.40183 | 0.90773 | 0.40183 | 1.20899 | 0.40183 | 1.66782 |
| 0.4823  | 0.8999  | 0.40193 | 0.90809 | 0.40192 | 1.20917 | 0.40192 | 1.66782 |
| 0.48241 | 0.90007 | 0.40202 | 0.90845 | 0.40201 | 1.20954 | 0.40202 | 1.66763 |
| 0.48252 | 0.90026 | 0.40211 | 0.90864 | 0.40211 | 1.20972 | 0.40211 | 1.66836 |
| 0.48264 | 0.90062 | 0.40221 | 0.90909 | 0.4022  | 1.20991 | 0.4022  | 1.66891 |
| 0.48275 | 0.90117 | 0.4023  | 0.90936 | 0.40229 | 1.21082 | 0.40229 | 1.66936 |
| 0.48286 | 0.90126 | 0.40239 | 0.90964 | 0.40239 | 1.21118 | 0.40239 | 1.66973 |
| 0.48297 | 0.90162 | 0.40248 | 0.91027 | 0.40247 | 1.21154 | 0.40247 | 1.67018 |
| 0.48308 | 0.90162 | 0.40258 | 0.91063 | 0.40257 | 1.212   | 0.40257 | 1.67063 |
| 0.48319 | 0.9019  | 0.40267 | 0.91109 | 0.40266 | 1.21218 | 0.40267 | 1.67164 |
| 0.4833  | 0.90244 | 0.40276 | 0.91154 | 0.40275 | 1.21254 | 0.40275 | 1.67182 |
| 0.48341 | 0.90272 | 0.40286 | 0.91218 | 0.40284 | 1.2129  | 0.40285 | 1.67218 |
| 0.48353 | 0.90281 | 0.40295 | 0.91254 | 0.40294 | 1.213   | 0.40294 | 1.67282 |
| 0.48363 | 0.90345 | 0.40304 | 0.913   | 0.40304 | 1.21345 | 0.40304 | 1.67318 |
| 0.48375 | 0.90353 | 0.40313 | 0.91336 | 0.40312 | 1.2139  | 0.40312 | 1.673   |
| 0.48385 | 0.90399 | 0.40323 | 0.91364 | 0.40322 | 1.21409 | 0.40322 | 1.67401 |
| 0.48397 | 0.90435 | 0.40331 | 0.914   | 0.40331 | 1.21409 | 0.40331 | 1.67464 |
| 0.48408 | 0.90444 | 0.40341 | 0.91409 | 0.4034  | 1.21464 | 0.4034  | 1.67546 |
| 0.48419 | 0.9049  | 0.4035  | 0.91437 | 0.4035  | 1.21509 | 0.4035  | 1.67592 |
| 0.4843  | 0.905   | 0.4036  | 0.91446 | 0.40359 | 1.21527 | 0.40359 | 1.67619 |
| 0.48441 | 0.90526 | 0.40369 | 0.915   | 0.40368 | 1.21555 | 0.40368 | 1.67655 |
| 0.48453 | 0.90554 | 0.40378 | 0.91555 | 0.40377 | 1.21591 | 0.40377 | 1.67746 |
| 0.48463 | 0.90599 | 0.40387 | 0.91592 | 0.40387 | 1.21618 | 0.40387 | 1.67755 |
| 0.48475 | 0.90663 | 0.40397 | 0.91609 | 0.40395 | 1.21645 | 0.40396 | 1.67856 |
| 0.48486 | 0.90672 | 0.40406 | 0.91637 | 0.40405 | 1.21682 | 0.40405 | 1.67964 |
| 0.48497 | 0.9069  | 0.40415 | 0.91691 | 0.40415 | 1.217   | 0.40415 | 1.68019 |
| 0.48508 | 0.90708 | 0.40424 | 0.91737 | 0.40424 | 1.21764 | 0.40424 | 1.68037 |
| 0.48519 | 0.90763 | 0.40434 | 0.91773 | 0.40433 | 1.21791 | 0.40433 | 1.68111 |
| 0.4853  | 0.90782 | 0.40443 | 0.9181  | 0.40442 | 1.218   | 0.40443 | 1.68101 |
| 0.48541 | 0.9079  | 0.40452 | 0.91837 | 0.40451 | 1.21836 | 0.40451 | 1.68165 |
| 0.48552 | 0.90818 | 0.40462 | 0.91865 | 0.4046  | 1.21855 | 0.40461 | 1.6822  |
| 0.48564 | 0.90836 | 0.40471 | 0.91883 | 0.4047  | 1.21855 | 0.4047  | 1.68301 |
| 0.48575 | 0.90872 | 0.4048  | 0.91928 | 0.4048  | 1.21909 | 0.4048  | 1.68347 |
| 0.48586 | 0.90891 | 0.40489 | 0.91955 | 0.40488 | 1.21955 | 0.40488 | 1.68402 |
| 0.48597 | 0.90891 | 0.40498 | 0.91992 | 0.40498 | 1.21955 | 0.40498 | 1.6842  |
| 0.48608 | 0.90927 | 0.40508 | 0.92019 | 0.40507 | 1.21983 | 0.40507 | 1.68483 |
| 0.4862  | 0.91    | 0.40517 | 0.92074 | 0.40516 | 1.2201  | 0.40516 | 1.68538 |
| 0.4863  | 0.90991 | 0.40527 | 0.92119 | 0.40525 | 1.22073 | 0.40526 | 1.68593 |
| 0.48642 | 0.91036 | 0.40535 | 0.92138 | 0.40535 | 1.22128 | 0.40535 | 1.68611 |

|         |         |         |         |         |         |         |         |
|---------|---------|---------|---------|---------|---------|---------|---------|
| 0.48652 | 0.91073 | 0.40545 | 0.92155 | 0.40544 | 1.22164 | 0.40544 | 1.68711 |
| 0.48664 | 0.911   | 0.40554 | 0.92174 | 0.40553 | 1.22174 | 0.40553 | 1.68747 |
| 0.48674 | 0.91136 | 0.40563 | 0.92201 | 0.40563 | 1.2221  | 0.40563 | 1.68765 |
| 0.48686 | 0.91164 | 0.40573 | 0.92247 | 0.40571 | 1.22228 | 0.40572 | 1.68802 |
| 0.48697 | 0.91191 | 0.40582 | 0.92274 | 0.40581 | 1.22264 | 0.40581 | 1.68866 |
| 0.48708 | 0.91218 | 0.40591 | 0.92329 | 0.4059  | 1.22301 | 0.40591 | 1.68902 |
| 0.48719 | 0.91255 | 0.406   | 0.92356 | 0.406   | 1.22346 | 0.406   | 1.68938 |
| 0.4873  | 0.91309 | 0.4061  | 0.92365 | 0.40609 | 1.22355 | 0.40609 | 1.69011 |
| 0.48741 | 0.91291 | 0.40619 | 0.92392 | 0.40618 | 1.22392 | 0.40618 | 1.69056 |
| 0.48752 | 0.91319 | 0.40628 | 0.92447 | 0.40628 | 1.22438 | 0.40627 | 1.69129 |
| 0.48764 | 0.91355 | 0.40638 | 0.92474 | 0.40636 | 1.22465 | 0.40637 | 1.6922  |
| 0.48775 | 0.91409 | 0.40647 | 0.9252  | 0.40646 | 1.22537 | 0.40646 | 1.69248 |
| 0.48786 | 0.91455 | 0.40656 | 0.92538 | 0.40655 | 1.22556 | 0.40655 | 1.69311 |
| 0.48797 | 0.91464 | 0.40665 | 0.92565 | 0.40664 | 1.22592 | 0.40664 | 1.69348 |
| 0.48808 | 0.9151  | 0.40674 | 0.92575 | 0.40674 | 1.22647 | 0.40674 | 1.69402 |
| 0.48819 | 0.9151  | 0.40683 | 0.92638 | 0.40683 | 1.22674 | 0.40683 | 1.69484 |
| 0.4883  | 0.91537 | 0.40693 | 0.92693 | 0.40692 | 1.22683 | 0.40692 | 1.69548 |
| 0.48841 | 0.91573 | 0.40703 | 0.9272  | 0.40701 | 1.22756 | 0.40702 | 1.69557 |
| 0.48853 | 0.91609 | 0.40711 | 0.92766 | 0.40711 | 1.22793 | 0.40711 | 1.69639 |
| 0.48863 | 0.91609 | 0.40721 | 0.92802 | 0.4072  | 1.22847 | 0.4072  | 1.69703 |
| 0.48875 | 0.91628 | 0.4073  | 0.92848 | 0.40729 | 1.22838 | 0.40729 | 1.69739 |
| 0.48885 | 0.91646 | 0.40739 | 0.92884 | 0.40738 | 1.22856 | 0.40738 | 1.69803 |
| 0.48897 | 0.91674 | 0.40749 | 0.92884 | 0.40747 | 1.22901 | 0.40748 | 1.69849 |
| 0.48908 | 0.91691 | 0.40758 | 0.92911 | 0.40757 | 1.22901 | 0.40757 | 1.69885 |
| 0.48919 | 0.91719 | 0.40767 | 0.92957 | 0.40766 | 1.22947 | 0.40767 | 1.69949 |
| 0.4893  | 0.91764 | 0.40776 | 0.92984 | 0.40775 | 1.22984 | 0.40775 | 1.70012 |
| 0.48941 | 0.91801 | 0.40786 | 0.93029 | 0.40785 | 1.23029 | 0.40785 | 1.70058 |
| 0.48953 | 0.91828 | 0.40795 | 0.93048 | 0.40794 | 1.23093 | 0.40794 | 1.70103 |
| 0.48963 | 0.91828 | 0.40804 | 0.93084 | 0.40803 | 1.2312  | 0.40803 | 1.70177 |
| 0.48975 | 0.91874 | 0.40814 | 0.93129 | 0.40812 | 1.23138 | 0.40813 | 1.70231 |
| 0.48986 | 0.9191  | 0.40823 | 0.93175 | 0.40822 | 1.23175 | 0.40822 | 1.70276 |
| 0.48997 | 0.9191  | 0.40832 | 0.93211 | 0.40831 | 1.2322  | 0.40831 | 1.70359 |
| 0.49008 | 0.91947 | 0.40841 | 0.93239 | 0.4084  | 1.23257 | 0.4084  | 1.7035  |
| 0.49019 | 0.92019 | 0.4085  | 0.93276 | 0.4085  | 1.23302 | 0.4085  | 1.70422 |
| 0.4903  | 0.92065 | 0.4086  | 0.93293 | 0.40859 | 1.23348 | 0.40859 | 1.7045  |
| 0.49041 | 0.92083 | 0.40869 | 0.93348 | 0.40868 | 1.23365 | 0.40868 | 1.7045  |
| 0.49052 | 0.92101 | 0.40878 | 0.93384 | 0.40877 | 1.23393 | 0.40878 | 1.7054  |
| 0.49064 | 0.92138 | 0.40887 | 0.93394 | 0.40887 | 1.23421 | 0.40887 | 1.70586 |
| 0.49075 | 0.92174 | 0.40897 | 0.93448 | 0.40896 | 1.23475 | 0.40896 | 1.70668 |
| 0.49086 | 0.92201 | 0.40906 | 0.93467 | 0.40905 | 1.23503 | 0.40905 | 1.70705 |
| 0.49097 | 0.92211 | 0.40915 | 0.93521 | 0.40914 | 1.2353  | 0.40914 | 1.70759 |
| 0.49108 | 0.92228 | 0.40925 | 0.9353  | 0.40923 | 1.23585 | 0.40924 | 1.70805 |
| 0.49119 | 0.92265 | 0.40934 | 0.93566 | 0.40933 | 1.23611 | 0.40933 | 1.70868 |
| 0.4913  | 0.92302 | 0.40943 | 0.93594 | 0.40942 | 1.23648 | 0.40942 | 1.70877 |
| 0.49142 | 0.92329 | 0.40952 | 0.93639 | 0.40951 | 1.23684 | 0.40951 | 1.70996 |
| 0.49152 | 0.92338 | 0.40962 | 0.93667 | 0.40961 | 1.23694 | 0.40961 | 1.7105  |
| 0.49164 | 0.92365 | 0.40971 | 0.93667 | 0.4097  | 1.2373  | 0.4097  | 1.71104 |
| 0.49174 | 0.92411 | 0.4098  | 0.9373  | 0.40979 | 1.23757 | 0.40979 | 1.71114 |
| 0.49186 | 0.92411 | 0.40989 | 0.93757 | 0.40988 | 1.23776 | 0.40989 | 1.71223 |
| 0.49197 | 0.92456 | 0.40998 | 0.93822 | 0.40998 | 1.23793 | 0.40998 | 1.71287 |
| 0.49208 | 0.92493 | 0.41008 | 0.93858 | 0.41007 | 1.23866 | 0.41007 | 1.71314 |
| 0.49219 | 0.92529 | 0.41017 | 0.93876 | 0.41016 | 1.23903 | 0.41016 | 1.71378 |
| 0.4923  | 0.92538 | 0.41026 | 0.93885 | 0.41026 | 1.23939 | 0.41026 | 1.7145  |
| 0.49241 | 0.92566 | 0.41036 | 0.93922 | 0.41034 | 1.23976 | 0.41034 | 1.71515 |

|         |         |         |         |         |         |         |         |
|---------|---------|---------|---------|---------|---------|---------|---------|
| 0.49252 | 0.92611 | 0.41045 | 0.93949 | 0.41044 | 1.23994 | 0.41044 | 1.71596 |
| 0.49264 | 0.92629 | 0.41054 | 0.94013 | 0.41053 | 1.24012 | 0.41054 | 1.71615 |
| 0.49275 | 0.92647 | 0.41063 | 0.94031 | 0.41062 | 1.24021 | 0.41062 | 1.7166  |
| 0.49286 | 0.92657 | 0.41073 | 0.94076 | 0.41072 | 1.24094 | 0.41072 | 1.71714 |
| 0.49297 | 0.92693 | 0.41082 | 0.94103 | 0.41081 | 1.24103 | 0.41081 | 1.71779 |
| 0.49308 | 0.9272  | 0.41091 | 0.9414  | 0.41091 | 1.2413  | 0.41091 | 1.71851 |
| 0.49319 | 0.92739 | 0.41101 | 0.94149 | 0.41099 | 1.24176 | 0.411   | 1.71915 |
| 0.4933  | 0.92766 | 0.41109 | 0.94204 | 0.41109 | 1.24221 | 0.41109 | 1.71942 |
| 0.49341 | 0.92802 | 0.41119 | 0.94249 | 0.41118 | 1.24249 | 0.41118 | 1.71924 |
| 0.49353 | 0.92848 | 0.41128 | 0.94258 | 0.41127 | 1.24267 | 0.41127 | 1.72024 |
| 0.49363 | 0.92884 | 0.41138 | 0.94322 | 0.41137 | 1.24303 | 0.41137 | 1.72097 |
| 0.49375 | 0.92893 | 0.41146 | 0.94349 | 0.41146 | 1.24322 | 0.41146 | 1.72134 |
| 0.49385 | 0.92948 | 0.41156 | 0.94349 | 0.41155 | 1.24367 | 0.41155 | 1.72225 |
| 0.49397 | 0.92957 | 0.41165 | 0.94385 | 0.41164 | 1.24358 | 0.41165 | 1.7226  |
| 0.49408 | 0.92993 | 0.41174 | 0.94431 | 0.41174 | 1.24413 | 0.41174 | 1.72279 |
| 0.49419 | 0.93048 | 0.41184 | 0.94458 | 0.41183 | 1.2444  | 0.41183 | 1.72397 |
| 0.4943  | 0.93066 | 0.41193 | 0.94467 | 0.41192 | 1.24476 | 0.41192 | 1.72452 |
| 0.49441 | 0.93048 | 0.41202 | 0.94504 | 0.41202 | 1.24494 | 0.41202 | 1.72497 |
| 0.49453 | 0.93085 | 0.41211 | 0.94532 | 0.4121  | 1.24522 | 0.41211 | 1.72624 |
| 0.49463 | 0.93121 | 0.41221 | 0.9455  | 0.4122  | 1.24567 | 0.4122  | 1.72661 |
| 0.49475 | 0.93139 | 0.4123  | 0.94604 | 0.41229 | 1.24612 | 0.41229 | 1.7267  |
| 0.49486 | 0.93203 | 0.41239 | 0.94641 | 0.41238 | 1.24658 | 0.41238 | 1.72698 |
| 0.49497 | 0.93221 | 0.41249 | 0.94631 | 0.41248 | 1.24713 | 0.41248 | 1.72761 |
| 0.49508 | 0.93221 | 0.41258 | 0.94668 | 0.41257 | 1.2474  | 0.41257 | 1.72816 |
| 0.49519 | 0.93257 | 0.41267 | 0.94704 | 0.41266 | 1.24767 | 0.41266 | 1.72907 |
| 0.4953  | 0.93293 | 0.41277 | 0.94723 | 0.41275 | 1.24831 | 0.41276 | 1.73016 |
| 0.49541 | 0.93339 | 0.41285 | 0.94768 | 0.41285 | 1.24867 | 0.41285 | 1.7307  |
| 0.49552 | 0.93366 | 0.41295 | 0.94796 | 0.41294 | 1.24876 | 0.41294 | 1.73098 |
| 0.49564 | 0.93384 | 0.41304 | 0.94841 | 0.41303 | 1.24913 | 0.41303 | 1.73161 |
| 0.49575 | 0.93439 | 0.41314 | 0.94878 | 0.41313 | 1.24958 | 0.41313 | 1.73216 |
| 0.49586 | 0.93467 | 0.41322 | 0.94922 | 0.41322 | 1.24986 | 0.41322 | 1.73271 |
| 0.49597 | 0.93458 | 0.41332 | 0.9495  | 0.41331 | 1.25013 | 0.41331 | 1.73307 |
| 0.49608 | 0.93485 | 0.41341 | 0.95013 | 0.4134  | 1.25086 | 0.41341 | 1.73334 |
| 0.4962  | 0.93512 | 0.4135  | 0.95013 | 0.4135  | 1.25113 | 0.41349 | 1.73417 |
| 0.4963  | 0.93566 | 0.4136  | 0.95013 | 0.41359 | 1.25131 | 0.41359 | 1.73435 |
| 0.49642 | 0.93576 | 0.41369 | 0.95032 | 0.41368 | 1.25168 | 0.41368 | 1.73453 |
| 0.49652 | 0.93631 | 0.41378 | 0.95095 | 0.41377 | 1.25195 | 0.41377 | 1.73544 |
| 0.49664 | 0.93657 | 0.41387 | 0.95123 | 0.41387 | 1.25214 | 0.41386 | 1.73598 |
| 0.49674 | 0.93685 | 0.41397 | 0.95159 | 0.41396 | 1.25277 | 0.41396 | 1.73635 |
| 0.49686 | 0.93721 | 0.41406 | 0.95178 | 0.41405 | 1.25286 | 0.41405 | 1.7368  |
| 0.49697 | 0.93758 | 0.41415 | 0.95241 | 0.41414 | 1.25295 | 0.41414 | 1.73726 |
| 0.49708 | 0.93794 | 0.41425 | 0.95277 | 0.41423 | 1.2535  | 0.41424 | 1.73781 |
| 0.49719 | 0.93813 | 0.41434 | 0.95314 | 0.41433 | 1.25368 | 0.41433 | 1.73881 |
| 0.4973  | 0.93839 | 0.41443 | 0.95342 | 0.41442 | 1.25414 | 0.41442 | 1.73917 |
| 0.49741 | 0.93867 | 0.41452 | 0.95387 | 0.41451 | 1.2545  | 0.41452 | 1.73926 |
| 0.49752 | 0.93922 | 0.41462 | 0.95423 | 0.41461 | 1.25477 | 0.41461 | 1.74018 |
| 0.49764 | 0.93912 | 0.41471 | 0.95441 | 0.4147  | 1.25532 | 0.4147  | 1.74099 |
| 0.49775 | 0.93922 | 0.4148  | 0.95496 | 0.41479 | 1.25559 | 0.41479 | 1.74135 |
| 0.49786 | 0.93986 | 0.41489 | 0.95533 | 0.41489 | 1.25586 | 0.41489 | 1.74218 |
| 0.49797 | 0.93994 | 0.41498 | 0.95578 | 0.41498 | 1.25651 | 0.41498 | 1.74254 |
| 0.49808 | 0.94022 | 0.41508 | 0.95615 | 0.41507 | 1.25678 | 0.41507 | 1.74308 |
| 0.49819 | 0.94103 | 0.41517 | 0.95605 | 0.41516 | 1.25687 | 0.41517 | 1.74391 |
| 0.49831 | 0.94131 | 0.41526 | 0.9566  | 0.41525 | 1.25733 | 0.41525 | 1.74427 |
| 0.49841 | 0.94131 | 0.41536 | 0.95723 | 0.41535 | 1.25787 | 0.41535 | 1.74472 |

|         |         |         |         |         |         |         |         |
|---------|---------|---------|---------|---------|---------|---------|---------|
| 0.49853 | 0.94168 | 0.41545 | 0.9576  | 0.41544 | 1.25841 | 0.41544 | 1.746   |
| 0.49863 | 0.94204 | 0.41554 | 0.95769 | 0.41554 | 1.25878 | 0.41554 | 1.74636 |
| 0.49875 | 0.94213 | 0.41563 | 0.95815 | 0.41562 | 1.25932 | 0.41562 | 1.74654 |
| 0.49885 | 0.94276 | 0.41573 | 0.95842 | 0.41572 | 1.25951 | 0.41572 | 1.74673 |
| 0.49897 | 0.94276 | 0.41582 | 0.9586  | 0.41581 | 1.25969 | 0.41581 | 1.74727 |
| 0.49908 | 0.94286 | 0.41591 | 0.95906 | 0.4159  | 1.26023 | 0.4159  | 1.74819 |
| 0.49919 | 0.94341 | 0.41601 | 0.95942 | 0.41599 | 1.26051 | 0.416   | 1.74864 |
| 0.4993  | 0.94376 | 0.4161  | 0.95951 | 0.41609 | 1.26096 | 0.41609 | 1.749   |
| 0.49941 | 0.94413 | 0.41619 | 0.9597  | 0.41618 | 1.26105 | 0.41618 | 1.74955 |
| 0.49953 | 0.94422 | 0.41628 | 0.96024 | 0.41627 | 1.26188 | 0.41628 | 1.75028 |
| 0.49963 | 0.94477 | 0.41637 | 0.96043 | 0.41637 | 1.26188 | 0.41637 | 1.75091 |
| 0.49975 | 0.94523 | 0.41647 | 0.96069 | 0.41646 | 1.26224 | 0.41646 | 1.75128 |
| 0.49986 | 0.94532 | 0.41656 | 0.96124 | 0.41655 | 1.2626  | 0.41655 | 1.75182 |
| 0.49997 | 0.9454  | 0.41665 | 0.96142 | 0.41665 | 1.2636  | 0.41665 | 1.75264 |
| 0.50008 | 0.94595 | 0.41674 | 0.96206 | 0.41674 | 1.26388 | 0.41674 | 1.75282 |
| 0.50019 | 0.94622 | 0.41684 | 0.96243 | 0.41683 | 1.26397 | 0.41683 | 1.75355 |
| 0.5003  | 0.94614 | 0.41693 | 0.96279 | 0.41692 | 1.26415 | 0.41692 | 1.75373 |
| 0.50042 | 0.94659 | 0.41702 | 0.96297 | 0.41701 | 1.26461 | 0.41701 | 1.75401 |
| 0.50052 | 0.94686 | 0.41712 | 0.96325 | 0.4171  | 1.26487 | 0.41711 | 1.75501 |
| 0.50064 | 0.94741 | 0.41721 | 0.96342 | 0.4172  | 1.26515 | 0.4172  | 1.75583 |
| 0.50075 | 0.94796 | 0.4173  | 0.96397 | 0.4173  | 1.26578 | 0.4173  | 1.75628 |
| 0.50086 | 0.94796 | 0.41739 | 0.96415 | 0.41738 | 1.26634 | 0.41738 | 1.75647 |
| 0.50097 | 0.94832 | 0.41748 | 0.96452 | 0.41748 | 1.26706 | 0.41748 | 1.75738 |
| 0.50108 | 0.94905 | 0.41758 | 0.96489 | 0.41757 | 1.26715 | 0.41757 | 1.75765 |
| 0.5012  | 0.94895 | 0.41767 | 0.96533 | 0.41766 | 1.2677  | 0.41766 | 1.75856 |
| 0.5013  | 0.94923 | 0.41776 | 0.9657  | 0.41775 | 1.26788 | 0.41776 | 1.75902 |
| 0.50142 | 0.94968 | 0.41785 | 0.96598 | 0.41785 | 1.26842 | 0.41785 | 1.75902 |
| 0.50152 | 0.94977 | 0.41795 | 0.96652 | 0.41794 | 1.26861 | 0.41794 | 1.75965 |
| 0.50164 | 0.95005 | 0.41804 | 0.9668  | 0.41803 | 1.2687  | 0.41804 | 1.76002 |
| 0.50174 | 0.95005 | 0.41813 | 0.96697 | 0.41813 | 1.26898 | 0.41813 | 1.76029 |
| 0.50186 | 0.95059 | 0.41823 | 0.96734 | 0.41822 | 1.2697  | 0.41822 | 1.7612  |
| 0.50197 | 0.95114 | 0.41832 | 0.96743 | 0.41831 | 1.26997 | 0.41831 | 1.76165 |
| 0.50208 | 0.95132 | 0.41841 | 0.96797 | 0.41841 | 1.27025 | 0.41841 | 1.7622  |
| 0.50219 | 0.95178 | 0.4185  | 0.96816 | 0.4185  | 1.27061 | 0.4185  | 1.76256 |
| 0.5023  | 0.95178 | 0.4186  | 0.96861 | 0.41859 | 1.27115 | 0.41859 | 1.76302 |
| 0.50241 | 0.95233 | 0.41868 | 0.96907 | 0.41868 | 1.27125 | 0.41868 | 1.76347 |
| 0.50253 | 0.95277 | 0.41878 | 0.96944 | 0.41877 | 1.27171 | 0.41877 | 1.76429 |
| 0.50264 | 0.95277 | 0.41888 | 0.9698  | 0.41886 | 1.27216 | 0.41887 | 1.76465 |
| 0.50275 | 0.95296 | 0.41896 | 0.97025 | 0.41896 | 1.27252 | 0.41896 | 1.7653  |
| 0.50286 | 0.95305 | 0.41906 | 0.97034 | 0.41905 | 1.27261 | 0.41905 | 1.76566 |
| 0.50297 | 0.95369 | 0.41915 | 0.97071 | 0.41914 | 1.27279 | 0.41914 | 1.76611 |
| 0.50308 | 0.95415 | 0.41925 | 0.97098 | 0.41924 | 1.27334 | 0.41924 | 1.7672  |
| 0.50319 | 0.95441 | 0.41934 | 0.97144 | 0.41933 | 1.27343 | 0.41933 | 1.76766 |
| 0.50331 | 0.95469 | 0.41943 | 0.97171 | 0.41942 | 1.27407 | 0.41942 | 1.76802 |
| 0.50341 | 0.95487 | 0.41952 | 0.97198 | 0.41951 | 1.27453 | 0.41952 | 1.76857 |
| 0.50353 | 0.95524 | 0.41961 | 0.97226 | 0.41961 | 1.2748  | 0.41961 | 1.76911 |
| 0.50363 | 0.95533 | 0.41971 | 0.97234 | 0.4197  | 1.27525 | 0.4197  | 1.76957 |
| 0.50375 | 0.9556  | 0.4198  | 0.97289 | 0.41979 | 1.27561 | 0.41979 | 1.77021 |
| 0.50385 | 0.95615 | 0.41989 | 0.97316 | 0.41989 | 1.2758  | 0.41989 | 1.77121 |
| 0.50397 | 0.95651 | 0.41999 | 0.97353 | 0.41998 | 1.27616 | 0.41998 | 1.77139 |
| 0.50408 | 0.95651 | 0.42008 | 0.97408 | 0.42007 | 1.27671 | 0.42007 | 1.77212 |
| 0.50419 | 0.95678 | 0.42017 | 0.97453 | 0.42016 | 1.27671 | 0.42016 | 1.77258 |
| 0.5043  | 0.95714 | 0.42026 | 0.97471 | 0.42025 | 1.27726 | 0.42025 | 1.77321 |
| 0.50441 | 0.9576  | 0.42036 | 0.97507 | 0.42035 | 1.27762 | 0.42035 | 1.77358 |

|         |         |         |         |         |         |         |         |
|---------|---------|---------|---------|---------|---------|---------|---------|
| 0.50453 | 0.95815 | 0.42044 | 0.97517 | 0.42044 | 1.27798 | 0.42044 | 1.77412 |
| 0.50463 | 0.95833 | 0.42054 | 0.97535 | 0.42053 | 1.27853 | 0.42053 | 1.77458 |
| 0.50475 | 0.95842 | 0.42064 | 0.97608 | 0.42062 | 1.27917 | 0.42063 | 1.7754  |
| 0.50486 | 0.95906 | 0.42072 | 0.97644 | 0.42072 | 1.27935 | 0.42072 | 1.77585 |
| 0.50497 | 0.95915 | 0.42082 | 0.97662 | 0.42081 | 1.27944 | 0.42081 | 1.7764  |
| 0.50508 | 0.95915 | 0.42091 | 0.97726 | 0.4209  | 1.27971 | 0.4209  | 1.77703 |
| 0.50519 | 0.95951 | 0.42101 | 0.97754 | 0.421   | 1.28017 | 0.421   | 1.77777 |
| 0.5053  | 0.9597  | 0.4211  | 0.97772 | 0.42109 | 1.28062 | 0.42109 | 1.77804 |
| 0.50541 | 0.96006 | 0.42119 | 0.97817 | 0.42118 | 1.28071 | 0.42118 | 1.77894 |
| 0.50552 | 0.96024 | 0.42128 | 0.97853 | 0.42127 | 1.28108 | 0.42128 | 1.7795  |
| 0.50564 | 0.96043 | 0.42137 | 0.97862 | 0.42136 | 1.28144 | 0.42136 | 1.77985 |
| 0.50575 | 0.96097 | 0.42147 | 0.97908 | 0.42146 | 1.28181 | 0.42146 | 1.7805  |
| 0.50586 | 0.96134 | 0.42156 | 0.97954 | 0.42155 | 1.28226 | 0.42155 | 1.78085 |
| 0.50597 | 0.96179 | 0.42165 | 0.97972 | 0.42165 | 1.28253 | 0.42165 | 1.78122 |
| 0.50608 | 0.96179 | 0.42175 | 0.97963 | 0.42173 | 1.28299 | 0.42174 | 1.78177 |
| 0.5062  | 0.96233 | 0.42184 | 0.98008 | 0.42183 | 1.28345 | 0.42183 | 1.78222 |
| 0.5063  | 0.96288 | 0.42193 | 0.98045 | 0.42192 | 1.28363 | 0.42192 | 1.78295 |
| 0.50642 | 0.96333 | 0.42202 | 0.98099 | 0.42201 | 1.28435 | 0.42201 | 1.78305 |
| 0.50652 | 0.96333 | 0.42212 | 0.98118 | 0.42211 | 1.28463 | 0.42211 | 1.78377 |
| 0.50664 | 0.96379 | 0.42221 | 0.98135 | 0.4222  | 1.2849  | 0.4222  | 1.7845  |
| 0.50674 | 0.96388 | 0.4223  | 0.98163 | 0.42229 | 1.28526 | 0.42229 | 1.78523 |
| 0.50686 | 0.96434 | 0.42239 | 0.98208 | 0.42238 | 1.28499 | 0.42239 | 1.7855  |
| 0.50697 | 0.9647  | 0.42248 | 0.98254 | 0.42248 | 1.28535 | 0.42248 | 1.78632 |
| 0.50708 | 0.96479 | 0.42258 | 0.98309 | 0.42257 | 1.28609 | 0.42257 | 1.78668 |
| 0.50719 | 0.96534 | 0.42267 | 0.98345 | 0.42266 | 1.28672 | 0.42266 | 1.78741 |
| 0.5073  | 0.96561 | 0.42276 | 0.98391 | 0.42276 | 1.28727 | 0.42276 | 1.78787 |
| 0.50741 | 0.96598 | 0.42286 | 0.98418 | 0.42285 | 1.28736 | 0.42285 | 1.78832 |
| 0.50752 | 0.96643 | 0.42295 | 0.98473 | 0.42294 | 1.28754 | 0.42294 | 1.78905 |
| 0.50764 | 0.96661 | 0.42304 | 0.985   | 0.42303 | 1.28772 | 0.42304 | 1.78932 |
| 0.50775 | 0.96671 | 0.42313 | 0.98536 | 0.42312 | 1.28808 | 0.42312 | 1.78978 |
| 0.50786 | 0.96716 | 0.42323 | 0.98572 | 0.42322 | 1.28854 | 0.42322 | 1.79096 |
| 0.50797 | 0.96761 | 0.42332 | 0.98591 | 0.42331 | 1.28899 | 0.42331 | 1.79133 |
| 0.50808 | 0.9678  | 0.42341 | 0.98655 | 0.42341 | 1.28945 | 0.42341 | 1.79196 |
| 0.50819 | 0.96798 | 0.42351 | 0.98691 | 0.42349 | 1.29009 | 0.4235  | 1.79251 |
| 0.50831 | 0.96825 | 0.42359 | 0.987   | 0.42359 | 1.29072 | 0.42359 | 1.79278 |
| 0.50841 | 0.96861 | 0.42369 | 0.98746 | 0.42368 | 1.29091 | 0.42368 | 1.79351 |
| 0.50853 | 0.96879 | 0.42378 | 0.988   | 0.42377 | 1.29109 | 0.42377 | 1.79433 |
| 0.50863 | 0.96934 | 0.42388 | 0.98818 | 0.42387 | 1.29136 | 0.42387 | 1.79433 |
| 0.50875 | 0.96998 | 0.42396 | 0.98855 | 0.42396 | 1.29209 | 0.42396 | 1.7947  |
| 0.50885 | 0.97034 | 0.42406 | 0.98927 | 0.42405 | 1.29246 | 0.42405 | 1.79561 |
| 0.50897 | 0.97034 | 0.42415 | 0.98945 | 0.42414 | 1.29291 | 0.42415 | 1.79596 |
| 0.50908 | 0.97026 | 0.42424 | 0.98991 | 0.42424 | 1.29337 | 0.42424 | 1.79652 |
| 0.50919 | 0.97071 | 0.42434 | 0.9901  | 0.42433 | 1.29409 | 0.42433 | 1.79688 |
| 0.5093  | 0.97116 | 0.42443 | 0.99019 | 0.42442 | 1.294   | 0.42442 | 1.79742 |
| 0.50941 | 0.97126 | 0.42452 | 0.99064 | 0.42452 | 1.29428 | 0.42452 | 1.79742 |
| 0.50953 | 0.97152 | 0.42462 | 0.99101 | 0.42461 | 1.29446 | 0.42461 | 1.7986  |
| 0.50963 | 0.97171 | 0.42471 | 0.99137 | 0.4247  | 1.29446 | 0.4247  | 1.79943 |
| 0.50975 | 0.97217 | 0.4248  | 0.99164 | 0.42479 | 1.29527 | 0.4248  | 1.79997 |
| 0.50986 | 0.97271 | 0.42489 | 0.99182 | 0.42489 | 1.29583 | 0.42489 | 1.80043 |
| 0.50997 | 0.9728  | 0.42499 | 0.99228 | 0.42498 | 1.29592 | 0.42498 | 1.80124 |
| 0.51008 | 0.97289 | 0.42508 | 0.99264 | 0.42507 | 1.29583 | 0.42507 | 1.80161 |
| 0.51019 | 0.97344 | 0.42517 | 0.99292 | 0.42516 | 1.29628 | 0.42516 | 1.80225 |
| 0.5103  | 0.97381 | 0.42527 | 0.9931  | 0.42525 | 1.29664 | 0.42526 | 1.80334 |
| 0.51042 | 0.97426 | 0.42535 | 0.99346 | 0.42535 | 1.29718 | 0.42535 | 1.80371 |

|         |         |         |         |         |         |         |         |
|---------|---------|---------|---------|---------|---------|---------|---------|
| 0.51052 | 0.97471 | 0.42545 | 0.99392 | 0.42544 | 1.29782 | 0.42544 | 1.80425 |
| 0.51064 | 0.97462 | 0.42554 | 0.99447 | 0.42553 | 1.298   | 0.42553 | 1.80452 |
| 0.51075 | 0.9749  | 0.42563 | 0.99474 | 0.42563 | 1.29874 | 0.42563 | 1.80498 |
| 0.51086 | 0.97544 | 0.42572 | 0.99501 | 0.42572 | 1.29883 | 0.42572 | 1.8058  |
| 0.51097 | 0.97572 | 0.42582 | 0.99492 | 0.42581 | 1.29883 | 0.42581 | 1.80625 |
| 0.51108 | 0.97599 | 0.42592 | 0.99537 | 0.4259  | 1.29947 | 0.42591 | 1.80653 |
| 0.5112  | 0.97644 | 0.426   | 0.99601 | 0.426   | 1.29983 | 0.42599 | 1.80734 |
| 0.5113  | 0.9769  | 0.4261  | 0.99592 | 0.42608 | 1.30028 | 0.42609 | 1.8078  |
| 0.51142 | 0.97699 | 0.42619 | 0.99647 | 0.42618 | 1.30074 | 0.42618 | 1.80798 |
| 0.51152 | 0.97708 | 0.42628 | 0.99692 | 0.42628 | 1.30147 | 0.42628 | 1.80852 |
| 0.51164 | 0.97717 | 0.42637 | 0.99692 | 0.42637 | 1.30183 | 0.42637 | 1.80907 |
| 0.51174 | 0.9779  | 0.42647 | 0.99728 | 0.42646 | 1.30237 | 0.42646 | 1.80935 |
| 0.51186 | 0.97826 | 0.42656 | 0.99783 | 0.42655 | 1.3022  | 0.42656 | 1.81017 |
| 0.51197 | 0.97853 | 0.42665 | 0.99792 | 0.42664 | 1.30274 | 0.42664 | 1.81098 |
| 0.51208 | 0.9789  | 0.42675 | 0.99838 | 0.42674 | 1.30329 | 0.42674 | 1.81163 |
| 0.51219 | 0.97918 | 0.42683 | 0.99883 | 0.42683 | 1.30356 | 0.42683 | 1.81208 |
| 0.5123  | 0.97944 | 0.42693 | 0.99901 | 0.42692 | 1.30383 | 0.42692 | 1.8128  |
| 0.51241 | 0.97972 | 0.42702 | 0.99938 | 0.42701 | 1.3042  | 0.42702 | 1.81326 |
| 0.51253 | 0.98017 | 0.42711 | 0.99974 | 0.42711 | 1.30483 | 0.42711 | 1.8139  |
| 0.51264 | 0.98054 | 0.42721 | 0.99984 | 0.4272  | 1.3052  | 0.4272  | 1.81435 |
| 0.51275 | 0.98091 | 0.4273  | 1.00029 | 0.42729 | 1.30556 | 0.42729 | 1.81453 |
| 0.51286 | 0.98109 | 0.42739 | 1.00102 | 0.42739 | 1.30565 | 0.42739 | 1.81517 |
| 0.51297 | 0.98154 | 0.42748 | 1.00111 | 0.42748 | 1.30556 | 0.42748 | 1.81536 |
| 0.51308 | 0.98172 | 0.42758 | 1.00147 | 0.42757 | 1.30629 | 0.42757 | 1.81608 |
| 0.51319 | 0.982   | 0.42767 | 1.00165 | 0.42766 | 1.30647 | 0.42767 | 1.81681 |
| 0.51331 | 0.98227 | 0.42776 | 1.00183 | 0.42775 | 1.30675 | 0.42775 | 1.81727 |
| 0.51341 | 0.98282 | 0.42786 | 1.00266 | 0.42784 | 1.30729 | 0.42785 | 1.81772 |
| 0.51353 | 0.98309 | 0.42795 | 1.00311 | 0.42794 | 1.30756 | 0.42794 | 1.81836 |
| 0.51363 | 0.98327 | 0.42804 | 1.0032  | 0.42803 | 1.30774 | 0.42803 | 1.81936 |
| 0.51375 | 0.98355 | 0.42813 | 1.00356 | 0.42812 | 1.30848 | 0.42813 | 1.81999 |
| 0.51385 | 0.98364 | 0.42823 | 1.00365 | 0.42822 | 1.30902 | 0.42822 | 1.82054 |
| 0.51397 | 0.98391 | 0.42832 | 1.00374 | 0.42831 | 1.30921 | 0.42832 | 1.82108 |
| 0.51408 | 0.98445 | 0.42841 | 1.00402 | 0.4284  | 1.30975 | 0.4284  | 1.82136 |
| 0.51419 | 0.98473 | 0.4285  | 1.00466 | 0.4285  | 1.30984 | 0.4285  | 1.822   |
| 0.5143  | 0.98491 | 0.42859 | 1.00493 | 0.42859 | 1.31002 | 0.42859 | 1.82281 |
| 0.51441 | 0.985   | 0.42869 | 1.00511 | 0.42868 | 1.31075 | 0.42868 | 1.82327 |
| 0.51453 | 0.98527 | 0.42878 | 1.00556 | 0.42877 | 1.31139 | 0.42878 | 1.82445 |
| 0.51464 | 0.98555 | 0.42887 | 1.00611 | 0.42887 | 1.31148 | 0.42887 | 1.82473 |
| 0.51475 | 0.98582 | 0.42897 | 1.00675 | 0.42895 | 1.31175 | 0.42896 | 1.82528 |
| 0.51486 | 0.98636 | 0.42906 | 1.00648 | 0.42905 | 1.3122  | 0.42905 | 1.826   |
| 0.51497 | 0.98664 | 0.42915 | 1.00684 | 0.42915 | 1.31239 | 0.42915 | 1.82682 |
| 0.51508 | 0.98709 | 0.42924 | 1.00712 | 0.42923 | 1.31293 | 0.42923 | 1.82728 |
| 0.51519 | 0.98764 | 0.42934 | 1.00748 | 0.42933 | 1.3133  | 0.42933 | 1.82792 |
| 0.5153  | 0.98773 | 0.42943 | 1.00812 | 0.42942 | 1.31385 | 0.42943 | 1.82819 |
| 0.51542 | 0.98754 | 0.42952 | 1.00812 | 0.42952 | 1.31402 | 0.42952 | 1.82883 |
| 0.51552 | 0.98791 | 0.42962 | 1.00839 | 0.4296  | 1.31457 | 0.42961 | 1.82937 |
| 0.51564 | 0.98809 | 0.42971 | 1.00866 | 0.4297  | 1.31466 | 0.4297  | 1.82991 |
| 0.51575 | 0.98873 | 0.4298  | 1.00939 | 0.42979 | 1.31512 | 0.42979 | 1.83028 |
| 0.51586 | 0.98937 | 0.42989 | 1.00967 | 0.42988 | 1.31558 | 0.42988 | 1.83092 |
| 0.51597 | 0.98955 | 0.42999 | 1.01003 | 0.42998 | 1.31576 | 0.42998 | 1.83055 |
| 0.51608 | 0.98991 | 0.43007 | 1.01011 | 0.43007 | 1.31621 | 0.43007 | 1.83101 |
| 0.5162  | 0.9901  | 0.43017 | 1.01039 | 0.43016 | 1.31648 | 0.43016 | 1.83147 |
| 0.5163  | 0.99028 | 0.43026 | 1.01093 | 0.43026 | 1.31685 | 0.43026 | 1.83219 |
| 0.51642 | 0.99073 | 0.43035 | 1.01121 | 0.43035 | 1.3173  | 0.43035 | 1.83228 |

|         |         |         |         |         |         |         |         |
|---------|---------|---------|---------|---------|---------|---------|---------|
| 0.51652 | 0.99109 | 0.43045 | 1.01148 | 0.43044 | 1.31721 | 0.43044 | 1.8331  |
| 0.51664 | 0.99137 | 0.43054 | 1.01194 | 0.43053 | 1.31757 | 0.43053 | 1.83374 |
| 0.51675 | 0.99146 | 0.43063 | 1.0124  | 0.43063 | 1.31822 | 0.43063 | 1.83438 |
| 0.51686 | 0.99182 | 0.43073 | 1.01294 | 0.43071 | 1.3183  | 0.43072 | 1.83483 |
| 0.51697 | 0.99228 | 0.43082 | 1.01303 | 0.43081 | 1.3184  | 0.43081 | 1.83547 |
| 0.51708 | 0.99256 | 0.43091 | 1.01358 | 0.43091 | 1.31876 | 0.4309  | 1.83601 |
| 0.51719 | 0.99292 | 0.431   | 1.01367 | 0.43099 | 1.31931 | 0.43099 | 1.83702 |
| 0.5173  | 0.99283 | 0.4311  | 1.01403 | 0.43109 | 1.31985 | 0.43109 | 1.83756 |
| 0.51741 | 0.99328 | 0.43119 | 1.01476 | 0.43118 | 1.3204  | 0.43119 | 1.8382  |
| 0.51752 | 0.99374 | 0.43128 | 1.01485 | 0.43128 | 1.32076 | 0.43127 | 1.83865 |
| 0.51764 | 0.9941  | 0.43138 | 1.01522 | 0.43136 | 1.32113 | 0.43137 | 1.83948 |
| 0.51775 | 0.99437 | 0.43146 | 1.01567 | 0.43146 | 1.32122 | 0.43146 | 1.84021 |
| 0.51786 | 0.99492 | 0.43156 | 1.01594 | 0.43155 | 1.32167 | 0.43155 | 1.84121 |
| 0.51797 | 0.9951  | 0.43165 | 1.01631 | 0.43164 | 1.32222 | 0.43164 | 1.84175 |
| 0.51808 | 0.99546 | 0.43175 | 1.01667 | 0.43174 | 1.32276 | 0.43174 | 1.84175 |
| 0.51819 | 0.99592 | 0.43184 | 1.01704 | 0.43183 | 1.3234  | 0.43183 | 1.84239 |
| 0.51831 | 0.99592 | 0.43193 | 1.01731 | 0.43192 | 1.32368 | 0.43192 | 1.8433  |
| 0.51841 | 0.99647 | 0.43202 | 1.01786 | 0.43202 | 1.32404 | 0.43202 | 1.84403 |
| 0.51853 | 0.99674 | 0.43211 | 1.01849 | 0.43211 | 1.3244  | 0.43211 | 1.84476 |
| 0.51863 | 0.99711 | 0.43221 | 1.01885 | 0.4322  | 1.32458 | 0.4322  | 1.84494 |
| 0.51875 | 0.99756 | 0.4323  | 1.01922 | 0.43229 | 1.32504 | 0.43229 | 1.84557 |
| 0.51885 | 0.99783 | 0.43239 | 1.01922 | 0.43238 | 1.3255  | 0.43238 | 1.84657 |
| 0.51897 | 0.99783 | 0.43249 | 1.01977 | 0.43248 | 1.32568 | 0.43248 | 1.84703 |
| 0.51908 | 0.99819 | 0.43258 | 1.02031 | 0.43257 | 1.32614 | 0.43257 | 1.84785 |
| 0.51919 | 0.99828 | 0.43267 | 1.0204  | 0.43266 | 1.32668 | 0.43266 | 1.84857 |
| 0.5193  | 0.99875 | 0.43276 | 1.0204  | 0.43275 | 1.32686 | 0.43275 | 1.84903 |
| 0.51941 | 0.9992  | 0.43286 | 1.02049 | 0.43285 | 1.32723 | 0.43285 | 1.84903 |
| 0.51953 | 0.99974 | 0.43295 | 1.02077 | 0.43294 | 1.32777 | 0.43295 | 1.84949 |
| 0.51964 | 0.99993 | 0.43304 | 1.02113 | 0.43303 | 1.32805 | 0.43303 | 1.84976 |
| 0.51975 | 1.0002  | 0.43314 | 1.0214  | 0.43312 | 1.32859 | 0.43313 | 1.8504  |
| 0.51986 | 1.00038 | 0.43323 | 1.02168 | 0.43322 | 1.3285  | 0.43322 | 1.85103 |
| 0.51997 | 1.00102 | 0.43332 | 1.02176 | 0.43331 | 1.32877 | 0.43331 | 1.85158 |
| 0.52008 | 1.00102 | 0.43341 | 1.02223 | 0.4334  | 1.32922 | 0.4334  | 1.85249 |
| 0.52019 | 1.00129 | 0.43351 | 1.02277 | 0.4335  | 1.32922 | 0.4335  | 1.85322 |
| 0.5203  | 1.00165 | 0.43359 | 1.02305 | 0.43359 | 1.32941 | 0.43359 | 1.85394 |
| 0.52042 | 1.00211 | 0.43369 | 1.02359 | 0.43368 | 1.32977 | 0.43368 | 1.85404 |
| 0.52052 | 1.00229 | 0.43378 | 1.02377 | 0.43377 | 1.3305  | 0.43378 | 1.85531 |
| 0.52064 | 1.00239 | 0.43387 | 1.02404 | 0.43386 | 1.33096 | 0.43386 | 1.85568 |
| 0.52075 | 1.00311 | 0.43397 | 1.02422 | 0.43396 | 1.33159 | 0.43396 | 1.85595 |
| 0.52086 | 1.00311 | 0.43406 | 1.02487 | 0.43405 | 1.33177 | 0.43405 | 1.85613 |
| 0.52097 | 1.00339 | 0.43415 | 1.02523 | 0.43415 | 1.33196 | 0.43415 | 1.85686 |
| 0.52108 | 1.00393 | 0.43425 | 1.02541 | 0.43423 | 1.3325  | 0.43424 | 1.85777 |
| 0.52119 | 1.0042  | 0.43434 | 1.02559 | 0.43433 | 1.33314 | 0.43433 | 1.8584  |
| 0.5213  | 1.00438 | 0.43443 | 1.02586 | 0.43442 | 1.33351 | 0.43442 | 1.85823 |
| 0.52142 | 1.00457 | 0.43452 | 1.0265  | 0.43451 | 1.33369 | 0.43451 | 1.85895 |
| 0.52152 | 1.0053  | 0.43462 | 1.02687 | 0.43461 | 1.33414 | 0.43461 | 1.85996 |
| 0.52164 | 1.00547 | 0.43471 | 1.02687 | 0.4347  | 1.33441 | 0.43471 | 1.85996 |
| 0.52174 | 1.00547 | 0.4348  | 1.02723 | 0.43479 | 1.3345  | 0.43479 | 1.86068 |
| 0.52186 | 1.00584 | 0.4349  | 1.02769 | 0.43488 | 1.33542 | 0.43489 | 1.86168 |
| 0.52197 | 1.0063  | 0.43498 | 1.02823 | 0.43498 | 1.3356  | 0.43498 | 1.86141 |
| 0.52208 | 1.00648 | 0.43508 | 1.02841 | 0.43507 | 1.33596 | 0.43507 | 1.86232 |
| 0.52219 | 1.00694 | 0.43517 | 1.02877 | 0.43516 | 1.33624 | 0.43516 | 1.86314 |
| 0.5223  | 1.00721 | 0.43526 | 1.02887 | 0.43526 | 1.33642 | 0.43526 | 1.86378 |
| 0.52241 | 1.00766 | 0.43536 | 1.02932 | 0.43535 | 1.33714 | 0.43535 | 1.86423 |

|         |         |         |         |         |         |         |         |
|---------|---------|---------|---------|---------|---------|---------|---------|
| 0.52252 | 1.00821 | 0.43545 | 1.02996 | 0.43544 | 1.33723 | 0.43544 | 1.86487 |
| 0.52264 | 1.00866 | 0.43554 | 1.03014 | 0.43553 | 1.33751 | 0.43554 | 1.8655  |
| 0.52275 | 1.00884 | 0.43563 | 1.03033 | 0.43562 | 1.33797 | 0.43562 | 1.86615 |
| 0.52286 | 1.00912 | 0.43573 | 1.03033 | 0.43572 | 1.3386  | 0.43572 | 1.86669 |
| 0.52297 | 1.0093  | 0.43582 | 1.03078 | 0.43581 | 1.33888 | 0.43581 | 1.86714 |
| 0.52308 | 1.00985 | 0.43591 | 1.03132 | 0.43591 | 1.33905 | 0.43591 | 1.86769 |
| 0.52319 | 1.00994 | 0.43601 | 1.03169 | 0.43599 | 1.33914 | 0.436   | 1.86824 |
| 0.5233  | 1.00994 | 0.43609 | 1.03178 | 0.43609 | 1.33951 | 0.43609 | 1.86869 |
| 0.52341 | 1.01003 | 0.43619 | 1.03205 | 0.43619 | 1.33978 | 0.43618 | 1.86924 |
| 0.52353 | 1.01085 | 0.43628 | 1.03251 | 0.43627 | 1.34005 | 0.43627 | 1.86969 |
| 0.52363 | 1.01094 | 0.43637 | 1.0326  | 0.43637 | 1.34088 | 0.43637 | 1.87051 |
| 0.52375 | 1.0113  | 0.43647 | 1.03315 | 0.43646 | 1.34106 | 0.43646 | 1.87106 |
| 0.52385 | 1.01166 | 0.43656 | 1.03369 | 0.43655 | 1.34161 | 0.43655 | 1.87142 |
| 0.52397 | 1.01185 | 0.43666 | 1.03451 | 0.43664 | 1.34197 | 0.43665 | 1.87242 |
| 0.52408 | 1.01221 | 0.43674 | 1.0346  | 0.43674 | 1.34233 | 0.43674 | 1.87297 |
| 0.52419 | 1.01267 | 0.43684 | 1.03488 | 0.43683 | 1.34288 | 0.43683 | 1.8737  |
| 0.5243  | 1.01276 | 0.43693 | 1.03497 | 0.43692 | 1.34297 | 0.43692 | 1.8746  |
| 0.52441 | 1.01312 | 0.43702 | 1.03542 | 0.43702 | 1.34325 | 0.43702 | 1.87524 |
| 0.52453 | 1.01358 | 0.43712 | 1.03597 | 0.4371  | 1.34415 | 0.4371  | 1.87588 |
| 0.52464 | 1.01385 | 0.43721 | 1.03633 | 0.4372  | 1.34443 | 0.4372  | 1.87597 |
| 0.52475 | 1.01403 | 0.4373  | 1.03697 | 0.43729 | 1.34443 | 0.43729 | 1.8767  |
| 0.52486 | 1.0143  | 0.43739 | 1.03724 | 0.43738 | 1.34506 | 0.43738 | 1.87761 |
| 0.52497 | 1.01449 | 0.43749 | 1.0377  | 0.43748 | 1.34561 | 0.43748 | 1.87815 |
| 0.52508 | 1.01504 | 0.43757 | 1.03825 | 0.43757 | 1.34598 | 0.43757 | 1.87889 |
| 0.52519 | 1.01504 | 0.43767 | 1.03842 | 0.43766 | 1.34643 | 0.43766 | 1.87906 |
| 0.5253  | 1.01531 | 0.43777 | 1.03851 | 0.43775 | 1.34661 | 0.43776 | 1.87952 |
| 0.52541 | 1.01595 | 0.43786 | 1.03916 | 0.43785 | 1.34706 | 0.43785 | 1.88043 |
| 0.52552 | 1.01612 | 0.43795 | 1.03952 | 0.43794 | 1.34752 | 0.43794 | 1.88098 |
| 0.52564 | 1.01612 | 0.43804 | 1.03952 | 0.43803 | 1.34761 | 0.43803 | 1.88125 |
| 0.52575 | 1.01649 | 0.43813 | 1.04007 | 0.43813 | 1.34825 | 0.43813 | 1.8817  |
| 0.52586 | 1.01704 | 0.43823 | 1.04043 | 0.43822 | 1.34852 | 0.43822 | 1.88252 |
| 0.52597 | 1.01713 | 0.43832 | 1.04088 | 0.43831 | 1.34862 | 0.43831 | 1.88298 |
| 0.52608 | 1.01777 | 0.43842 | 1.04133 | 0.4384  | 1.34907 | 0.43841 | 1.88353 |
| 0.5262  | 1.01831 | 0.4385  | 1.0417  | 0.4385  | 1.34953 | 0.4385  | 1.88425 |
| 0.5263  | 1.0184  | 0.4386  | 1.04225 | 0.43859 | 1.35016 | 0.43859 | 1.88471 |
| 0.52642 | 1.01858 | 0.43869 | 1.04261 | 0.43868 | 1.35044 | 0.43868 | 1.88508 |
| 0.52652 | 1.01894 | 0.43878 | 1.04289 | 0.43877 | 1.35053 | 0.43877 | 1.88571 |
| 0.52664 | 1.0195  | 0.43888 | 1.04306 | 0.43886 | 1.35089 | 0.43887 | 1.88626 |
| 0.52675 | 1.02022 | 0.43897 | 1.04343 | 0.43896 | 1.35125 | 0.43896 | 1.88716 |
| 0.52686 | 1.0204  | 0.43906 | 1.04397 | 0.43905 | 1.35161 | 0.43905 | 1.88807 |
| 0.52697 | 1.02059 | 0.43915 | 1.04443 | 0.43914 | 1.3518  | 0.43914 | 1.8888  |
| 0.52708 | 1.02114 | 0.43925 | 1.0448  | 0.43924 | 1.35252 | 0.43924 | 1.88935 |
| 0.52719 | 1.0214  | 0.43933 | 1.04507 | 0.43933 | 1.35307 | 0.43933 | 1.88963 |
| 0.5273  | 1.02158 | 0.43943 | 1.04562 | 0.43942 | 1.35326 | 0.43942 | 1.89026 |
| 0.52741 | 1.02186 | 0.43953 | 1.04598 | 0.43951 | 1.35335 | 0.43952 | 1.89126 |
| 0.52752 | 1.02231 | 0.43962 | 1.04625 | 0.43961 | 1.35389 | 0.43961 | 1.8919  |
| 0.52764 | 1.02277 | 0.43971 | 1.04653 | 0.4397  | 1.35434 | 0.4397  | 1.89208 |
| 0.52775 | 1.02296 | 0.4398  | 1.04671 | 0.43979 | 1.35498 | 0.43979 | 1.8929  |
| 0.52786 | 1.02341 | 0.43989 | 1.04707 | 0.43989 | 1.35535 | 0.43989 | 1.89363 |
| 0.52797 | 1.0235  | 0.43998 | 1.04744 | 0.43997 | 1.3558  | 0.43997 | 1.89381 |
| 0.52808 | 1.02368 | 0.44008 | 1.04789 | 0.44007 | 1.35589 | 0.44007 | 1.89463 |
| 0.52819 | 1.02404 | 0.44017 | 1.04807 | 0.44016 | 1.35608 | 0.44017 | 1.89499 |
| 0.52831 | 1.02432 | 0.44026 | 1.04852 | 0.44026 | 1.35671 | 0.44026 | 1.89545 |
| 0.52841 | 1.02441 | 0.44036 | 1.0488  | 0.44035 | 1.35726 | 0.44035 | 1.89618 |



|          |          |          |          |          |          |          |          |
|----------|----------|----------|----------|----------|----------|----------|----------|
| 0. 52853 | 1. 02468 | 0. 44045 | 1. 04908 | 0. 44044 | 1. 35763 | 0. 44044 | 1. 89681 |
| 0. 52863 | 1. 02504 | 0. 44054 | 1. 04944 | 0. 44053 | 1. 35781 | 0. 44053 | 1. 89736 |
| 0. 52875 | 1. 02541 | 0. 44063 | 1. 04962 | 0. 44062 | 1. 35853 | 0. 44062 | 1. 89818 |
| 0. 52885 | 1. 02586 | 0. 44073 | 1. 0498  | 0. 44072 | 1. 35899 | 0. 44072 | 1. 89873 |
| 0. 52897 | 1. 02614 | 0. 44082 | 1. 05007 | 0. 44081 | 1. 35908 | 0. 44082 | 1. 899   |
| 0. 52908 | 1. 02659 | 0. 44091 | 1. 05062 | 0. 4409  | 1. 35935 | 0. 4409  | 1. 89927 |
| 0. 52919 | 1. 02705 | 0. 441   | 1. 05107 | 0. 44099 | 1. 35962 | 0. 441   | 1. 89991 |
| 0. 5293  | 1. 02741 | 0. 44109 | 1. 05144 | 0. 44109 | 1. 36017 | 0. 44109 | 1. 90064 |
| 0. 52941 | 1. 02751 | 0. 44119 | 1. 05172 | 0. 44118 | 1. 36054 | 0. 44118 | 1. 90136 |
| 0. 52953 | 1. 02796 | 0. 44129 | 1. 05226 | 0. 44127 | 1. 36118 | 0. 44128 | 1. 90192 |
| 0. 52963 | 1. 02823 | 0. 44137 | 1. 05253 | 0. 44137 | 1. 36144 | 0. 44137 | 1. 902   |
| 0. 52975 | 1. 02841 | 0. 44147 | 1. 05289 | 0. 44146 | 1. 36163 | 0. 44146 | 1. 90246 |
| 0. 52986 | 1. 02905 | 0. 44156 | 1. 05289 | 0. 44155 | 1. 3619  | 0. 44155 | 1. 9031  |
| 0. 52997 | 1. 02896 | 0. 44165 | 1. 05317 | 0. 44165 | 1. 36199 | 0. 44165 | 1. 90337 |
| 0. 53008 | 1. 02924 | 0. 44174 | 1. 05371 | 0. 44173 | 1. 36281 | 0. 44173 | 1. 90455 |
| 0. 53019 | 1. 02987 | 0. 44184 | 1. 05417 | 0. 44183 | 1. 36318 | 0. 44183 | 1. 90537 |
| 0. 5303  | 1. 03014 | 0. 44193 | 1. 05435 | 0. 44192 | 1. 36363 | 0. 44193 | 1. 90537 |
| 0. 53042 | 1. 03014 | 0. 44202 | 1. 05471 | 0. 44202 | 1. 36399 | 0. 44202 | 1. 90601 |
| 0. 53052 | 1. 03069 | 0. 44212 | 1. 05508 | 0. 4421  | 1. 36427 | 0. 44211 | 1. 90665 |
| 0. 53064 | 1. 03096 | 0. 44221 | 1. 05545 | 0. 4422  | 1. 36454 | 0. 4422  | 1. 90692 |
| 0. 53075 | 1. 0316  | 0. 4423  | 1. 0559  | 0. 44229 | 1. 36518 | 0. 44229 | 1. 90783 |
| 0. 53086 | 1. 03224 | 0. 44239 | 1. 05617 | 0. 44238 | 1. 36536 | 0. 44239 | 1. 90856 |
| 0. 53097 | 1. 03224 | 0. 44249 | 1. 05645 | 0. 44248 | 1. 36563 | 0. 44248 | 1. 90929 |
| 0. 53108 | 1. 03215 | 0. 44258 | 1. 05663 | 0. 44257 | 1. 36618 | 0. 44257 | 1. 90992 |
| 0. 5312  | 1. 03251 | 0. 44267 | 1. 0569  | 0. 44266 | 1. 36627 | 0. 44266 | 1. 91093 |
| 0. 5313  | 1. 0326  | 0. 44276 | 1. 05727 | 0. 44275 | 1. 36654 | 0. 44276 | 1. 91147 |
| 0. 53142 | 1. 03296 | 0. 44285 | 1. 05772 | 0. 44285 | 1. 367   | 0. 44285 | 1. 91137 |
| 0. 53152 | 1. 03315 | 0. 44295 | 1. 05781 | 0. 44294 | 1. 36727 | 0. 44294 | 1. 91201 |
| 0. 53164 | 1. 0336  | 0. 44304 | 1. 05808 | 0. 44303 | 1. 36746 | 0. 44304 | 1. 91293 |
| 0. 53174 | 1. 03415 | 0. 44313 | 1. 05845 | 0. 44313 | 1. 36782 | 0. 44313 | 1. 91311 |
| 0. 53186 | 1. 03442 | 0. 44323 | 1. 05891 | 0. 44322 | 1. 36791 | 0. 44322 | 1. 91429 |
| 0. 53197 | 1. 03451 | 0. 44332 | 1. 05918 | 0. 44331 | 1. 36818 | 0. 44331 | 1. 91448 |
| 0. 53208 | 1. 03497 | 0. 44341 | 1. 05954 | 0. 44341 | 1. 36909 | 0. 44341 | 1. 91502 |
| 0. 53219 | 1. 03543 | 0. 4435  | 1. 05981 | 0. 4435  | 1. 36955 | 0. 4435  | 1. 91575 |
| 0. 5323  | 1. 03588 | 0. 4436  | 1. 06    | 0. 44359 | 1. 37    | 0. 44359 | 1. 91575 |
| 0. 53241 | 1. 03633 | 0. 44369 | 1. 06018 | 0. 44368 | 1. 37064 | 0. 44368 | 1. 91656 |
| 0. 53253 | 1. 03679 | 0. 44378 | 1. 06027 | 0. 44378 | 1. 37082 | 0. 44377 | 1. 9172  |
| 0. 53264 | 1. 03715 | 0. 44388 | 1. 06063 | 0. 44386 | 1. 37146 | 0. 44387 | 1. 91775 |
| 0. 53275 | 1. 03715 | 0. 44396 | 1. 06109 | 0. 44396 | 1. 37191 | 0. 44396 | 1. 91839 |
| 0. 53286 | 1. 03751 | 0. 44406 | 1. 06145 | 0. 44405 | 1. 37237 | 0. 44405 | 1. 91866 |
| 0. 53297 | 1. 03788 | 0. 44415 | 1. 06155 | 0. 44414 | 1. 37227 | 0. 44414 | 1. 91948 |
| 0. 53308 | 1. 03842 | 0. 44424 | 1. 062   | 0. 44424 | 1. 37264 | 0. 44424 | 1. 92021 |
| 0. 53319 | 1. 03879 | 0. 44434 | 1. 06227 | 0. 44433 | 1. 37283 | 0. 44433 | 1. 92094 |
| 0. 53331 | 1. 03879 | 0. 44443 | 1. 06263 | 0. 44442 | 1. 37319 | 0. 44442 | 1. 92111 |
| 0. 53341 | 1. 03925 | 0. 44453 | 1. 06328 | 0. 44451 | 1. 37365 | 0. 44452 | 1. 92203 |
| 0. 53353 | 1. 03979 | 0. 44461 | 1. 06345 | 0. 44461 | 1. 37401 | 0. 44461 | 1. 92212 |
| 0. 53363 | 1. 04007 | 0. 44471 | 1. 06363 | 0. 4447  | 1. 37446 | 0. 4447  | 1. 92258 |
| 0. 53375 | 1. 04052 | 0. 4448  | 1. 06382 | 0. 44479 | 1. 37492 | 0. 44479 | 1. 92339 |
| 0. 53385 | 1. 04061 | 0. 44489 | 1. 06391 | 0. 44489 | 1. 37528 | 0. 44489 | 1. 92412 |
| 0. 53397 | 1. 04106 | 0. 44499 | 1. 06455 | 0. 44498 | 1. 37565 | 0. 44498 | 1. 92449 |
| 0. 53408 | 1. 04134 | 0. 44508 | 1. 06482 | 0. 44507 | 1. 3761  | 0. 44507 | 1. 92503 |
| 0. 53419 | 1. 0417  | 0. 44517 | 1. 06545 | 0. 44517 | 1. 37647 | 0. 44517 | 1. 92549 |
| 0. 5343  | 1. 04207 | 0. 44526 | 1. 06573 | 0. 44525 | 1. 37692 | 0. 44525 | 1. 92603 |
| 0. 53441 | 1. 04252 | 0. 44536 | 1. 066   | 0. 44535 | 1. 37756 | 0. 44535 | 1. 92721 |

|          |          |          |          |          |          |          |          |
|----------|----------|----------|----------|----------|----------|----------|----------|
| 0. 53453 | 1. 04252 | 0. 44544 | 1. 06609 | 0. 44544 | 1. 37783 | 0. 44544 | 1. 92721 |
| 0. 53464 | 1. 0427  | 0. 44554 | 1. 06646 | 0. 44553 | 1. 3781  | 0. 44553 | 1. 92749 |
| 0. 53475 | 1. 04306 | 0. 44564 | 1. 06692 | 0. 44562 | 1. 37838 | 0. 44563 | 1. 92813 |
| 0. 53486 | 1. 04334 | 0. 44572 | 1. 0671  | 0. 44572 | 1. 3791  | 0. 44572 | 1. 92904 |
| 0. 53497 | 1. 04352 | 0. 44582 | 1. 06727 | 0. 44581 | 1. 37928 | 0. 44581 | 1. 9294  |
| 0. 53508 | 1. 04407 | 0. 44591 | 1. 06792 | 0. 4459  | 1. 37947 | 0. 4459  | 1. 92995 |
| 0. 53519 | 1. 04453 | 0. 446   | 1. 06837 | 0. 446   | 1. 37956 | 0. 446   | 1. 93068 |
| 0. 5353  | 1. 04489 | 0. 4461  | 1. 06864 | 0. 44609 | 1. 3802  | 0. 44609 | 1. 93149 |
| 0. 53542 | 1. 04507 | 0. 44619 | 1. 0691  | 0. 44618 | 1. 38092 | 0. 44618 | 1. 9324  |
| 0. 53552 | 1. 04516 | 0. 44628 | 1. 06919 | 0. 44627 | 1. 38147 | 0. 44628 | 1. 93286 |
| 0. 53564 | 1. 04552 | 0. 44637 | 1. 06983 | 0. 44636 | 1. 38147 | 0. 44636 | 1. 93313 |
| 0. 53575 | 1. 04625 | 0. 44647 | 1. 07019 | 0. 44646 | 1. 38174 | 0. 44646 | 1. 9335  |
| 0. 53586 | 1. 04671 | 0. 44656 | 1. 07046 | 0. 44655 | 1. 3822  | 0. 44656 | 1. 9344  |
| 0. 53597 | 1. 0468  | 0. 44665 | 1. 07083 | 0. 44664 | 1. 38238 | 0. 44664 | 1. 93495 |
| 0. 53608 | 1. 04717 | 0. 44675 | 1. 07147 | 0. 44673 | 1. 38302 | 0. 44674 | 1. 93531 |
| 0. 5362  | 1. 04753 | 0. 44684 | 1. 07156 | 0. 44683 | 1. 38365 | 0. 44683 | 1. 93622 |
| 0. 5363  | 1. 0478  | 0. 44693 | 1. 07138 | 0. 44693 | 1. 38365 | 0. 44693 | 1. 93705 |
| 0. 53642 | 1. 04825 | 0. 44702 | 1. 07201 | 0. 44701 | 1. 38429 | 0. 44701 | 1. 93768 |
| 0. 53652 | 1. 04844 | 0. 44712 | 1. 07237 | 0. 44711 | 1. 38511 | 0. 44711 | 1. 93878 |
| 0. 53664 | 1. 0489  | 0. 4472  | 1. 07283 | 0. 4472  | 1. 38511 | 0. 4472  | 1. 93941 |
| 0. 53674 | 1. 04935 | 0. 4473  | 1. 07319 | 0. 44729 | 1. 38539 | 0. 44729 | 1. 93995 |
| 0. 53686 | 1. 04953 | 0. 44739 | 1. 07337 | 0. 44738 | 1. 38593 | 0. 44739 | 1. 9405  |
| 0. 53697 | 1. 04971 | 0. 44748 | 1. 07383 | 0. 44748 | 1. 38621 | 0. 44748 | 1. 94123 |
| 0. 53708 | 1. 05053 | 0. 44758 | 1. 07447 | 0. 44757 | 1. 38666 | 0. 44757 | 1. 9415  |
| 0. 53719 | 1. 05062 | 0. 44767 | 1. 07474 | 0. 44766 | 1. 38712 | 0. 44766 | 1. 94223 |
| 0. 5373  | 1. 05062 | 0. 44776 | 1. 0751  | 0. 44776 | 1. 38766 | 0. 44776 | 1. 94296 |
| 0. 53741 | 1. 05108 | 0. 44786 | 1. 07538 | 0. 44784 | 1. 3882  | 0. 44785 | 1. 94378 |
| 0. 53752 | 1. 05153 | 0. 44795 | 1. 07583 | 0. 44794 | 1. 38839 | 0. 44794 | 1. 94442 |
| 0. 53764 | 1. 05172 | 0. 44804 | 1. 07629 | 0. 44803 | 1. 38875 | 0. 44804 | 1. 94487 |
| 0. 53775 | 1. 05208 | 0. 44813 | 1. 07665 | 0. 44813 | 1. 38948 | 0. 44813 | 1. 94578 |
| 0. 53786 | 1. 05217 | 0. 44823 | 1. 07684 | 0. 44822 | 1. 38985 | 0. 44822 | 1. 94624 |
| 0. 53797 | 1. 05217 | 0. 44832 | 1. 07711 | 0. 44831 | 1. 39011 | 0. 44831 | 1. 94679 |
| 0. 53808 | 1. 05263 | 0. 44841 | 1. 07756 | 0. 4484  | 1. 39057 | 0. 4484  | 1. 94706 |
| 0. 53819 | 1. 05308 | 0. 44851 | 1. 07792 | 0. 44849 | 1. 39076 | 0. 4485  | 1. 94751 |
| 0. 53831 | 1. 05344 | 0. 4486  | 1. 07811 | 0. 44859 | 1. 39103 | 0. 44859 | 1. 94824 |
| 0. 53841 | 1. 05353 | 0. 44869 | 1. 07847 | 0. 44869 | 1. 39157 | 0. 44868 | 1. 9486  |
| 0. 53853 | 1. 05427 | 0. 44878 | 1. 07884 | 0. 44877 | 1. 39194 | 0. 44877 | 1. 94951 |
| 0. 53863 | 1. 05454 | 0. 44887 | 1. 07938 | 0. 44887 | 1. 39258 | 0. 44887 | 1. 95024 |
| 0. 53875 | 1. 05472 | 0. 44897 | 1. 07974 | 0. 44896 | 1. 39312 | 0. 44896 | 1. 95088 |
| 0. 53885 | 1. 05517 | 0. 44906 | 1. 07984 | 0. 44905 | 1. 39348 | 0. 44905 | 1. 9517  |
| 0. 53897 | 1. 05581 | 0. 44916 | 1. 08039 | 0. 44914 | 1. 39339 | 0. 44915 | 1. 95234 |
| 0. 53908 | 1. 0559  | 0. 44924 | 1. 08075 | 0. 44924 | 1. 39403 | 0. 44924 | 1. 9527  |
| 0. 53919 | 1. 05635 | 0. 44934 | 1. 08084 | 0. 44933 | 1. 3943  | 0. 44933 | 1. 95333 |
| 0. 5393  | 1. 05663 | 0. 44943 | 1. 08148 | 0. 44942 | 1. 39467 | 0. 44942 | 1. 95397 |
| 0. 53941 | 1. 05727 | 0. 44952 | 1. 08193 | 0. 44952 | 1. 3953  | 0. 44952 | 1. 95489 |
| 0. 53953 | 1. 0579  | 0. 44962 | 1. 0822  | 0. 4496  | 1. 39567 | 0. 44961 | 1. 95589 |
| 0. 53963 | 1. 05818 | 0. 44971 | 1. 08266 | 0. 4497  | 1. 39594 | 0. 4497  | 1. 9567  |
| 0. 53975 | 1. 05818 | 0. 4498  | 1. 08302 | 0. 44979 | 1. 39612 | 0. 4498  | 1. 95716 |
| 0. 53986 | 1. 05872 | 0. 44989 | 1. 08302 | 0. 44989 | 1. 39649 | 0. 44989 | 1. 95816 |
| 0. 53997 | 1. 05927 | 0. 44999 | 1. 0832  | 0. 44998 | 1. 39676 | 0. 44998 | 1. 95871 |
| 0. 54008 | 1. 05936 | 0. 45008 | 1. 08384 | 0. 45007 | 1. 39713 | 0. 45008 | 1. 95889 |
| 0. 54019 | 1. 0599  | 0. 45017 | 1. 0843  | 0. 45016 | 1. 39731 | 0. 45016 | 1. 95952 |
| 0. 5403  | 1. 06018 | 0. 45027 | 1. 08448 | 0. 45025 | 1. 39803 | 0. 45026 | 1. 96017 |
| 0. 54042 | 1. 06045 | 0. 45036 | 1. 08475 | 0. 45035 | 1. 39876 | 0. 45035 | 1. 96071 |

|         |         |         |         |         |         |         |         |
|---------|---------|---------|---------|---------|---------|---------|---------|
| 0.54052 | 1.06063 | 0.45045 | 1.08521 | 0.45044 | 1.39868 | 0.45044 | 1.96162 |
| 0.54064 | 1.06091 | 0.45054 | 1.08548 | 0.45053 | 1.39922 | 0.45053 | 1.96207 |
| 0.54075 | 1.06127 | 0.45063 | 1.08584 | 0.45063 | 1.39986 | 0.45063 | 1.96235 |
| 0.54086 | 1.06182 | 0.45072 | 1.08593 | 0.45072 | 1.40022 | 0.45072 | 1.96326 |
| 0.54097 | 1.06191 | 0.45082 | 1.0863  | 0.45081 | 1.4004  | 0.45081 | 1.9639  |
| 0.54108 | 1.06237 | 0.45092 | 1.08675 | 0.4509  | 1.40104 | 0.45091 | 1.96444 |
| 0.5412  | 1.06282 | 0.451   | 1.08712 | 0.451   | 1.40149 | 0.45099 | 1.96544 |
| 0.5413  | 1.06282 | 0.4511  | 1.08749 | 0.45109 | 1.40186 | 0.45109 | 1.96535 |
| 0.54142 | 1.063   | 0.45119 | 1.08784 | 0.45118 | 1.40232 | 0.45118 | 1.96571 |
| 0.54152 | 1.06336 | 0.45128 | 1.08812 | 0.45127 | 1.40277 | 0.45127 | 1.96662 |
| 0.54164 | 1.06382 | 0.45138 | 1.08839 | 0.45136 | 1.40313 | 0.45137 | 1.96708 |
| 0.54174 | 1.06445 | 0.45147 | 1.08876 | 0.45146 | 1.40377 | 0.45146 | 1.96772 |
| 0.54186 | 1.06482 | 0.45156 | 1.08894 | 0.45155 | 1.40413 | 0.45156 | 1.96826 |
| 0.54197 | 1.0651  | 0.45165 | 1.08922 | 0.45164 | 1.4044  | 0.45164 | 1.96899 |
| 0.54208 | 1.06555 | 0.45175 | 1.08967 | 0.45174 | 1.4045  | 0.45174 | 1.96917 |
| 0.54219 | 1.06555 | 0.45184 | 1.09003 | 0.45183 | 1.40504 | 0.45183 | 1.97009 |
| 0.5423  | 1.06609 | 0.45193 | 1.0903  | 0.45192 | 1.40559 | 0.45192 | 1.971   |
| 0.54241 | 1.06682 | 0.45203 | 1.09067 | 0.45201 | 1.40595 | 0.45202 | 1.97136 |
| 0.54253 | 1.06701 | 0.45212 | 1.09104 | 0.45211 | 1.4065  | 0.45211 | 1.97163 |
| 0.54264 | 1.06719 | 0.45221 | 1.09176 | 0.4522  | 1.40696 | 0.4522  | 1.97199 |
| 0.54275 | 1.06737 | 0.4523  | 1.09213 | 0.45229 | 1.40705 | 0.45229 | 1.973   |
| 0.54286 | 1.06792 | 0.45239 | 1.0924  | 0.45239 | 1.40769 | 0.45239 | 1.97418 |
| 0.54297 | 1.0681  | 0.45248 | 1.09267 | 0.45247 | 1.40769 | 0.45247 | 1.97482 |
| 0.54308 | 1.06855 | 0.45258 | 1.09285 | 0.45257 | 1.40787 | 0.45257 | 1.97482 |
| 0.54319 | 1.06919 | 0.45267 | 1.09349 | 0.45266 | 1.40832 | 0.45267 | 1.97537 |
| 0.54331 | 1.06947 | 0.45276 | 1.09422 | 0.45276 | 1.40877 | 0.45276 | 1.97627 |
| 0.54341 | 1.06983 | 0.45286 | 1.09431 | 0.45285 | 1.40923 | 0.45285 | 1.97736 |
| 0.54353 | 1.0701  | 0.45295 | 1.0944  | 0.45294 | 1.4096  | 0.45294 | 1.97827 |
| 0.54363 | 1.07019 | 0.45304 | 1.09494 | 0.45303 | 1.40996 | 0.45303 | 1.97837 |
| 0.54375 | 1.07101 | 0.45314 | 1.09531 | 0.45312 | 1.4105  | 0.45313 | 1.979   |
| 0.54385 | 1.0712  | 0.45323 | 1.09558 | 0.45322 | 1.41105 | 0.45322 | 1.97991 |
| 0.54397 | 1.07129 | 0.45332 | 1.09595 | 0.45331 | 1.41132 | 0.45332 | 1.9801  |
| 0.54408 | 1.07147 | 0.45341 | 1.09613 | 0.4534  | 1.41187 | 0.4534  | 1.98082 |
| 0.54419 | 1.07165 | 0.45351 | 1.09659 | 0.4535  | 1.41224 | 0.4535  | 1.98155 |
| 0.5443  | 1.07228 | 0.4536  | 1.09686 | 0.45359 | 1.41287 | 0.45359 | 1.98192 |
| 0.54441 | 1.07256 | 0.45369 | 1.09731 | 0.45368 | 1.41351 | 0.45368 | 1.98274 |
| 0.54453 | 1.07265 | 0.45378 | 1.09768 | 0.45377 | 1.41378 | 0.45378 | 1.98346 |
| 0.54464 | 1.07292 | 0.45387 | 1.09822 | 0.45387 | 1.41414 | 0.45387 | 1.98401 |
| 0.54475 | 1.07337 | 0.45397 | 1.09841 | 0.45396 | 1.41451 | 0.45396 | 1.98446 |
| 0.54486 | 1.07402 | 0.45406 | 1.09886 | 0.45405 | 1.41478 | 0.45405 | 1.9851  |
| 0.54497 | 1.07429 | 0.45415 | 1.09904 | 0.45415 | 1.41533 | 0.45415 | 1.98574 |
| 0.54508 | 1.07465 | 0.45424 | 1.09959 | 0.45423 | 1.4156  | 0.45423 | 1.98592 |
| 0.54519 | 1.07483 | 0.45434 | 1.09996 | 0.45433 | 1.41596 | 0.45433 | 1.98683 |
| 0.5453  | 1.07529 | 0.45443 | 1.10032 | 0.45442 | 1.41633 | 0.45443 | 1.98747 |
| 0.54542 | 1.07583 | 0.45452 | 1.10059 | 0.45451 | 1.41706 | 0.45451 | 1.98774 |
| 0.54552 | 1.0762  | 0.45462 | 1.10077 | 0.4546  | 1.41715 | 0.45461 | 1.98884 |
| 0.54564 | 1.07647 | 0.45471 | 1.10123 | 0.4547  | 1.41733 | 0.4547  | 1.98938 |
| 0.54575 | 1.07684 | 0.4548  | 1.1015  | 0.4548  | 1.41788 | 0.4548  | 1.99002 |
| 0.54586 | 1.0772  | 0.45489 | 1.10187 | 0.45488 | 1.41833 | 0.45489 | 1.99038 |
| 0.54597 | 1.07756 | 0.45498 | 1.10259 | 0.45498 | 1.41851 | 0.45498 | 1.99065 |
| 0.54608 | 1.07774 | 0.45508 | 1.10286 | 0.45507 | 1.41851 | 0.45507 | 1.99129 |
| 0.5462  | 1.07783 | 0.45517 | 1.10286 | 0.45516 | 1.41888 | 0.45516 | 1.99248 |
| 0.5463  | 1.07793 | 0.45527 | 1.10314 | 0.45526 | 1.41915 | 0.45526 | 1.99275 |
| 0.54642 | 1.07829 | 0.45535 | 1.10396 | 0.45535 | 1.4197  | 0.45535 | 1.99338 |

|         |         |         |         |         |         |         |         |
|---------|---------|---------|---------|---------|---------|---------|---------|
| 0.54652 | 1.07875 | 0.45545 | 1.10414 | 0.45544 | 1.42006 | 0.45544 | 1.99466 |
| 0.54664 | 1.0792  | 0.45554 | 1.10441 | 0.45553 | 1.42033 | 0.45554 | 1.99521 |
| 0.54675 | 1.07966 | 0.45563 | 1.10486 | 0.45563 | 1.42106 | 0.45563 | 1.99566 |
| 0.54686 | 1.0802  | 0.45573 | 1.10496 | 0.45571 | 1.42161 | 0.45572 | 1.99621 |
| 0.54697 | 1.08075 | 0.45582 | 1.10541 | 0.45581 | 1.42207 | 0.45581 | 1.99657 |
| 0.54708 | 1.08084 | 0.45591 | 1.10568 | 0.45591 | 1.42225 | 0.4559  | 1.99748 |
| 0.54719 | 1.08102 | 0.456   | 1.10596 | 0.45599 | 1.4227  | 0.45599 | 1.9983  |
| 0.5473  | 1.0813  | 0.4561  | 1.10605 | 0.45609 | 1.42315 | 0.45609 | 1.99876 |
| 0.54741 | 1.08175 | 0.45619 | 1.10642 | 0.45618 | 1.4237  | 0.45618 | 1.99912 |
| 0.54753 | 1.08203 | 0.45628 | 1.10678 | 0.45627 | 1.42425 | 0.45627 | 1.99994 |
| 0.54764 | 1.0822  | 0.45638 | 1.10723 | 0.45636 | 1.4248  | 0.45637 | 2.00085 |
| 0.54775 | 1.08257 | 0.45647 | 1.10778 | 0.45646 | 1.42497 | 0.45646 | 2.0013  |
| 0.54786 | 1.08311 | 0.45656 | 1.10824 | 0.45655 | 1.4257  | 0.45655 | 2.00239 |
| 0.54797 | 1.08348 | 0.45665 | 1.10869 | 0.45664 | 1.42607 | 0.45664 | 2.00285 |
| 0.54808 | 1.08402 | 0.45674 | 1.10905 | 0.45674 | 1.42652 | 0.45674 | 2.00304 |
| 0.54819 | 1.08448 | 0.45684 | 1.10933 | 0.45683 | 1.42671 | 0.45683 | 2.0033  |
| 0.54831 | 1.08467 | 0.45693 | 1.10996 | 0.45692 | 1.42716 | 0.45692 | 2.00449 |
| 0.54841 | 1.08521 | 0.45703 | 1.10996 | 0.45702 | 1.4277  | 0.45702 | 2.00477 |
| 0.54853 | 1.08548 | 0.45711 | 1.11014 | 0.45711 | 1.42835 | 0.45711 | 2.00549 |
| 0.54863 | 1.08575 | 0.45721 | 1.11088 | 0.4572  | 1.42871 | 0.4572  | 2.00613 |
| 0.54875 | 1.08603 | 0.4573  | 1.11115 | 0.45729 | 1.42935 | 0.45729 | 2.00704 |
| 0.54886 | 1.08658 | 0.45739 | 1.11142 | 0.45738 | 1.4298  | 0.45738 | 2.00804 |
| 0.54897 | 1.08685 | 0.45749 | 1.1117  | 0.45747 | 1.42999 | 0.45748 | 2.00822 |
| 0.54908 | 1.08694 | 0.45758 | 1.11224 | 0.45757 | 1.4299  | 0.45757 | 2.0085  |
| 0.54919 | 1.08721 | 0.45767 | 1.1126  | 0.45766 | 1.43017 | 0.45766 | 2.00895 |
| 0.5493  | 1.08757 | 0.45776 | 1.11297 | 0.45775 | 1.43053 | 0.45775 | 2.00977 |
| 0.54941 | 1.08785 | 0.45786 | 1.11352 | 0.45785 | 1.43107 | 0.45785 | 2.01049 |
| 0.54953 | 1.0883  | 0.45795 | 1.1137  | 0.45794 | 1.43153 | 0.45794 | 2.01131 |
| 0.54964 | 1.08858 | 0.45804 | 1.11406 | 0.45803 | 1.43153 | 0.45803 | 2.01177 |
| 0.54975 | 1.08922 | 0.45814 | 1.11434 | 0.45812 | 1.43226 | 0.45813 | 2.0125  |
| 0.54986 | 1.08967 | 0.45823 | 1.1147  | 0.45822 | 1.4328  | 0.45822 | 2.01305 |
| 0.54997 | 1.09012 | 0.45832 | 1.11515 | 0.45831 | 1.43317 | 0.45831 | 2.01313 |
| 0.55008 | 1.0903  | 0.45841 | 1.11533 | 0.4584  | 1.43344 | 0.4584  | 2.01386 |
| 0.55019 | 1.09058 | 0.45851 | 1.11542 | 0.4585  | 1.43362 | 0.4585  | 2.01469 |
| 0.5503  | 1.09085 | 0.4586  | 1.11561 | 0.45859 | 1.43426 | 0.45859 | 2.01532 |
| 0.55042 | 1.09113 | 0.45869 | 1.11606 | 0.45868 | 1.43471 | 0.45868 | 2.01614 |
| 0.55052 | 1.09158 | 0.45878 | 1.11652 | 0.45878 | 1.43471 | 0.45878 | 2.01651 |
| 0.55064 | 1.09167 | 0.45887 | 1.11697 | 0.45887 | 1.43536 | 0.45887 | 2.01696 |
| 0.55075 | 1.09204 | 0.45897 | 1.11707 | 0.45896 | 1.43562 | 0.45896 | 2.01768 |
| 0.55086 | 1.09249 | 0.45906 | 1.11743 | 0.45905 | 1.43617 | 0.45905 | 2.01833 |
| 0.55097 | 1.09276 | 0.45915 | 1.11779 | 0.45914 | 1.43617 | 0.45914 | 2.01878 |
| 0.55108 | 1.09295 | 0.45925 | 1.11816 | 0.45923 | 1.43681 | 0.45924 | 2.01905 |
| 0.5512  | 1.0934  | 0.45934 | 1.11816 | 0.45933 | 1.43736 | 0.45933 | 2.01933 |
| 0.5513  | 1.09368 | 0.45943 | 1.11861 | 0.45943 | 1.43772 | 0.45943 | 2.01969 |
| 0.55142 | 1.09413 | 0.45952 | 1.11907 | 0.45951 | 1.43818 | 0.45951 | 2.02024 |
| 0.55152 | 1.09467 | 0.45962 | 1.11961 | 0.45961 | 1.43854 | 0.45961 | 2.02087 |
| 0.55164 | 1.09504 | 0.45971 | 1.11989 | 0.4597  | 1.43891 | 0.4597  | 2.0216  |
| 0.55174 | 1.0954  | 0.4598  | 1.12016 | 0.45979 | 1.43963 | 0.45979 | 2.02197 |
| 0.55186 | 1.09558 | 0.4599  | 1.12034 | 0.45988 | 1.44017 | 0.45989 | 2.02315 |
| 0.55197 | 1.09558 | 0.45998 | 1.12098 | 0.45998 | 1.44009 | 0.45998 | 2.02342 |
| 0.55208 | 1.09632 | 0.46008 | 1.12134 | 0.46007 | 1.44091 | 0.46007 | 2.02415 |
| 0.55219 | 1.09677 | 0.46017 | 1.12171 | 0.46016 | 1.44118 | 0.46016 | 2.02506 |
| 0.5523  | 1.09723 | 0.46026 | 1.12216 | 0.46026 | 1.44136 | 0.46026 | 2.02551 |
| 0.55241 | 1.09759 | 0.46036 | 1.12234 | 0.46035 | 1.44172 | 0.46035 | 2.02597 |

|         |         |         |         |         |         |         |         |
|---------|---------|---------|---------|---------|---------|---------|---------|
| 0.55252 | 1.09813 | 0.46045 | 1.12243 | 0.46044 | 1.44191 | 0.46044 | 2.02652 |
| 0.55264 | 1.09859 | 0.46054 | 1.12307 | 0.46054 | 1.44237 | 0.46054 | 2.02752 |
| 0.55275 | 1.09877 | 0.46063 | 1.12343 | 0.46063 | 1.44282 | 0.46063 | 2.02815 |
| 0.55286 | 1.09922 | 0.46073 | 1.12371 | 0.46072 | 1.44282 | 0.46072 | 2.02833 |
| 0.55297 | 1.09968 | 0.46082 | 1.1238  | 0.46081 | 1.44345 | 0.46081 | 2.02943 |
| 0.55308 | 1.10032 | 0.46091 | 1.12425 | 0.4609  | 1.44372 | 0.4609  | 2.03015 |
| 0.55319 | 1.1005  | 0.46101 | 1.12462 | 0.46099 | 1.44419 | 0.461   | 2.03088 |
| 0.5533  | 1.10041 | 0.4611  | 1.12499 | 0.46109 | 1.44445 | 0.46109 | 2.03152 |
| 0.55341 | 1.10096 | 0.46119 | 1.12543 | 0.46119 | 1.44491 | 0.46118 | 2.03244 |
| 0.55353 | 1.10141 | 0.46128 | 1.1259  | 0.46127 | 1.44546 | 0.46127 | 2.03279 |
| 0.55363 | 1.10204 | 0.46137 | 1.12608 | 0.46137 | 1.44591 | 0.46137 | 2.03334 |
| 0.55375 | 1.10223 | 0.46147 | 1.12644 | 0.46146 | 1.44636 | 0.46146 | 2.03379 |
| 0.55385 | 1.1025  | 0.46156 | 1.1269  | 0.46155 | 1.44673 | 0.46155 | 2.03462 |
| 0.55397 | 1.10286 | 0.46165 | 1.12726 | 0.46164 | 1.44701 | 0.46165 | 2.03525 |
| 0.55408 | 1.10296 | 0.46174 | 1.12762 | 0.46174 | 1.44773 | 0.46174 | 2.03607 |
| 0.55419 | 1.10296 | 0.46184 | 1.12799 | 0.46183 | 1.44792 | 0.46183 | 2.03653 |
| 0.5543  | 1.10332 | 0.46193 | 1.12853 | 0.46192 | 1.44792 | 0.46192 | 2.03708 |
| 0.55441 | 1.10378 | 0.46202 | 1.12881 | 0.46202 | 1.44837 | 0.46202 | 2.03771 |
| 0.55453 | 1.10405 | 0.46212 | 1.12881 | 0.46211 | 1.44873 | 0.46211 | 2.03853 |
| 0.55463 | 1.10478 | 0.46221 | 1.12944 | 0.4622  | 1.44928 | 0.4622  | 2.0389  |
| 0.55475 | 1.10523 | 0.4623  | 1.12999 | 0.4623  | 1.44991 | 0.4623  | 2.03935 |
| 0.55486 | 1.10569 | 0.46239 | 1.13026 | 0.46239 | 1.45037 | 0.46239 | 2.04017 |
| 0.55497 | 1.10596 | 0.46249 | 1.13054 | 0.46248 | 1.45091 | 0.46248 | 2.04126 |
| 0.55508 | 1.10624 | 0.46257 | 1.1309  | 0.46257 | 1.45156 | 0.46257 | 2.04226 |
| 0.55519 | 1.10678 | 0.46267 | 1.13126 | 0.46266 | 1.45192 | 0.46266 | 2.04217 |
| 0.5553  | 1.10705 | 0.46277 | 1.13162 | 0.46275 | 1.4521  | 0.46276 | 2.04272 |
| 0.55542 | 1.10705 | 0.46285 | 1.13236 | 0.46285 | 1.45292 | 0.46285 | 2.04345 |
| 0.55552 | 1.10733 | 0.46295 | 1.13281 | 0.46294 | 1.45319 | 0.46294 | 2.04399 |
| 0.55564 | 1.10778 | 0.46304 | 1.133   | 0.46303 | 1.45346 | 0.46303 | 2.04463 |
| 0.55575 | 1.10833 | 0.46314 | 1.13309 | 0.46313 | 1.45402 | 0.46313 | 2.04508 |
| 0.55586 | 1.10905 | 0.46323 | 1.13354 | 0.46322 | 1.45429 | 0.46322 | 2.0459  |
| 0.55597 | 1.10915 | 0.46332 | 1.1339  | 0.46331 | 1.45474 | 0.46331 | 2.04673 |
| 0.55608 | 1.10942 | 0.46341 | 1.13436 | 0.4634  | 1.45538 | 0.46341 | 2.04736 |
| 0.5562  | 1.1096  | 0.4635  | 1.13472 | 0.4635  | 1.45565 | 0.4635  | 2.04781 |
| 0.5563  | 1.11015 | 0.4636  | 1.1349  | 0.46359 | 1.45592 | 0.46359 | 2.04927 |
| 0.55642 | 1.1107  | 0.46369 | 1.13517 | 0.46368 | 1.45666 | 0.46368 | 2.04955 |
| 0.55652 | 1.11097 | 0.46378 | 1.13517 | 0.46378 | 1.45674 | 0.46378 | 2.04972 |
| 0.55664 | 1.11088 | 0.46387 | 1.13554 | 0.46387 | 1.45738 | 0.46387 | 2.05091 |
| 0.55674 | 1.11124 | 0.46397 | 1.136   | 0.46396 | 1.45802 | 0.46396 | 2.05146 |
| 0.55686 | 1.11161 | 0.46406 | 1.13664 | 0.46405 | 1.45838 | 0.46405 | 2.05182 |
| 0.55697 | 1.11161 | 0.46415 | 1.137   | 0.46414 | 1.45893 | 0.46414 | 2.05264 |
| 0.55708 | 1.11215 | 0.46425 | 1.13718 | 0.46424 | 1.45957 | 0.46424 | 2.05327 |
| 0.55719 | 1.1126  | 0.46433 | 1.13772 | 0.46433 | 1.45974 | 0.46433 | 2.054   |
| 0.5573  | 1.11315 | 0.46443 | 1.13827 | 0.46442 | 1.46002 | 0.46442 | 2.05464 |
| 0.55741 | 1.11352 | 0.46453 | 1.13864 | 0.46451 | 1.46065 | 0.46452 | 2.05501 |
| 0.55752 | 1.11361 | 0.46461 | 1.13927 | 0.46461 | 1.46102 | 0.46461 | 2.05591 |
| 0.55764 | 1.11352 | 0.46471 | 1.13927 | 0.4647  | 1.46139 | 0.4647  | 2.05692 |
| 0.55775 | 1.11415 | 0.4648  | 1.13964 | 0.46479 | 1.46184 | 0.46479 | 2.05747 |
| 0.55786 | 1.11461 | 0.46489 | 1.14009 | 0.46489 | 1.46221 | 0.46489 | 2.05828 |
| 0.55797 | 1.11506 | 0.46499 | 1.14046 | 0.46497 | 1.46256 | 0.46498 | 2.05873 |
| 0.55808 | 1.1157  | 0.46508 | 1.14073 | 0.46507 | 1.46311 | 0.46507 | 2.05919 |
| 0.55819 | 1.11606 | 0.46517 | 1.14082 | 0.46516 | 1.46366 | 0.46517 | 2.05992 |
| 0.55831 | 1.11606 | 0.46526 | 1.141   | 0.46525 | 1.46421 | 0.46525 | 2.06137 |
| 0.55841 | 1.11643 | 0.46536 | 1.14182 | 0.46535 | 1.46466 | 0.46535 | 2.06156 |

|         |         |         |         |         |         |         |         |
|---------|---------|---------|---------|---------|---------|---------|---------|
| 0.55853 | 1.11652 | 0.46545 | 1.14191 | 0.46544 | 1.46512 | 0.46544 | 2.0621  |
| 0.55863 | 1.11679 | 0.46554 | 1.14236 | 0.46554 | 1.46539 | 0.46554 | 2.06301 |
| 0.55875 | 1.11752 | 0.46564 | 1.14301 | 0.46562 | 1.46575 | 0.46563 | 2.06338 |
| 0.55886 | 1.11806 | 0.46573 | 1.14319 | 0.46572 | 1.46621 | 0.46572 | 2.06347 |
| 0.55897 | 1.11843 | 0.46582 | 1.14355 | 0.46581 | 1.46639 | 0.46581 | 2.0642  |
| 0.55908 | 1.11889 | 0.46591 | 1.14419 | 0.4659  | 1.46658 | 0.4659  | 2.06492 |
| 0.55919 | 1.11898 | 0.466   | 1.14446 | 0.466   | 1.46685 | 0.466   | 2.06565 |
| 0.5593  | 1.11943 | 0.4661  | 1.14491 | 0.46609 | 1.4673  | 0.46609 | 2.06666 |
| 0.55941 | 1.11989 | 0.46619 | 1.14519 | 0.46618 | 1.46766 | 0.46618 | 2.0672  |
| 0.55953 | 1.12034 | 0.46628 | 1.14537 | 0.46627 | 1.4683  | 0.46628 | 2.06784 |
| 0.55964 | 1.12053 | 0.46637 | 1.14565 | 0.46637 | 1.46894 | 0.46637 | 2.06875 |
| 0.55975 | 1.1208  | 0.46647 | 1.14592 | 0.46646 | 1.46967 | 0.46646 | 2.06948 |
| 0.55986 | 1.12135 | 0.46656 | 1.14674 | 0.46655 | 1.47003 | 0.46655 | 2.07011 |
| 0.55997 | 1.12161 | 0.46665 | 1.1471  | 0.46665 | 1.47003 | 0.46665 | 2.07057 |
| 0.56008 | 1.12198 | 0.46674 | 1.14728 | 0.46674 | 1.47067 | 0.46674 | 2.07102 |
| 0.56019 | 1.12189 | 0.46684 | 1.14737 | 0.46683 | 1.47103 | 0.46683 | 2.07166 |
| 0.5603  | 1.12216 | 0.46693 | 1.14764 | 0.46692 | 1.47149 | 0.46693 | 2.07248 |
| 0.56042 | 1.12261 | 0.46702 | 1.1481  | 0.46701 | 1.47167 | 0.46701 | 2.07284 |
| 0.56052 | 1.12308 | 0.46712 | 1.14846 | 0.46711 | 1.47194 | 0.46711 | 2.07384 |
| 0.56064 | 1.12353 | 0.46721 | 1.14874 | 0.4672  | 1.47285 | 0.4672  | 2.07394 |
| 0.56075 | 1.1238  | 0.4673  | 1.1491  | 0.4673  | 1.4734  | 0.4673  | 2.07466 |
| 0.56086 | 1.12417 | 0.46739 | 1.1492  | 0.46738 | 1.47367 | 0.46739 | 2.07503 |
| 0.56097 | 1.12453 | 0.46748 | 1.14983 | 0.46748 | 1.47395 | 0.46748 | 2.07548 |
| 0.56108 | 1.12499 | 0.46758 | 1.14974 | 0.46757 | 1.4744  | 0.46757 | 2.07676 |
| 0.5612  | 1.12499 | 0.46767 | 1.1501  | 0.46766 | 1.47494 | 0.46766 | 2.07731 |
| 0.5613  | 1.12535 | 0.46777 | 1.15047 | 0.46775 | 1.4754  | 0.46776 | 2.07831 |
| 0.56142 | 1.1258  | 0.46785 | 1.15065 | 0.46785 | 1.47576 | 0.46785 | 2.07867 |
| 0.56152 | 1.12599 | 0.46795 | 1.15119 | 0.46794 | 1.47622 | 0.46794 | 2.0793  |
| 0.56164 | 1.12644 | 0.46804 | 1.15156 | 0.46803 | 1.47622 | 0.46804 | 2.07995 |
| 0.56174 | 1.1269  | 0.46813 | 1.15156 | 0.46813 | 1.47685 | 0.46813 | 2.08022 |
| 0.56186 | 1.12735 | 0.46823 | 1.15201 | 0.46821 | 1.47713 | 0.46822 | 2.08085 |
| 0.56197 | 1.12717 | 0.46832 | 1.15266 | 0.46831 | 1.4774  | 0.46831 | 2.08149 |
| 0.56208 | 1.12799 | 0.46841 | 1.15293 | 0.46841 | 1.47804 | 0.46841 | 2.08222 |
| 0.56219 | 1.12853 | 0.4685  | 1.1532  | 0.4685  | 1.47822 | 0.4685  | 2.08285 |
| 0.5623  | 1.1289  | 0.4686  | 1.15347 | 0.46859 | 1.47868 | 0.46859 | 2.08359 |
| 0.56241 | 1.12935 | 0.46869 | 1.15347 | 0.46868 | 1.47895 | 0.46869 | 2.08404 |
| 0.56253 | 1.1299  | 0.46878 | 1.15384 | 0.46878 | 1.4795  | 0.46877 | 2.08486 |
| 0.56264 | 1.1299  | 0.46888 | 1.15429 | 0.46887 | 1.47959 | 0.46887 | 2.08541 |
| 0.56275 | 1.13036 | 0.46897 | 1.15438 | 0.46896 | 1.48013 | 0.46896 | 2.08577 |
| 0.56286 | 1.13099 | 0.46906 | 1.15483 | 0.46905 | 1.48068 | 0.46905 | 2.08631 |
| 0.56297 | 1.13126 | 0.46915 | 1.15511 | 0.46914 | 1.48123 | 0.46915 | 2.08732 |
| 0.56309 | 1.13172 | 0.46924 | 1.15539 | 0.46924 | 1.48132 | 0.46924 | 2.08786 |
| 0.56319 | 1.13208 | 0.46934 | 1.15593 | 0.46933 | 1.48168 | 0.46933 | 2.08832 |
| 0.56331 | 1.13236 | 0.46943 | 1.15648 | 0.46942 | 1.48241 | 0.46942 | 2.08941 |
| 0.56341 | 1.13272 | 0.46953 | 1.15675 | 0.46951 | 1.48295 | 0.46952 | 2.09004 |
| 0.56353 | 1.13318 | 0.46961 | 1.15702 | 0.46961 | 1.48351 | 0.46961 | 2.09069 |
| 0.56363 | 1.13345 | 0.46971 | 1.15729 | 0.4697  | 1.48378 | 0.4697  | 2.09123 |
| 0.56375 | 1.13382 | 0.4698  | 1.15784 | 0.46979 | 1.48451 | 0.4698  | 2.09177 |
| 0.56386 | 1.13382 | 0.46989 | 1.1582  | 0.46988 | 1.48468 | 0.46988 | 2.0925  |
| 0.56397 | 1.13418 | 0.46999 | 1.15857 | 0.46997 | 1.48514 | 0.46998 | 2.09314 |
| 0.56408 | 1.13473 | 0.47008 | 1.15902 | 0.47007 | 1.4855  | 0.47007 | 2.09332 |
| 0.56419 | 1.13527 | 0.47017 | 1.15911 | 0.47017 | 1.48578 | 0.47017 | 2.09396 |
| 0.5643  | 1.13554 | 0.47026 | 1.1593  | 0.47025 | 1.48642 | 0.47025 | 2.09514 |
| 0.56441 | 1.13609 | 0.47036 | 1.15984 | 0.47035 | 1.48696 | 0.47035 | 2.09569 |

|         |         |         |         |         |         |         |         |
|---------|---------|---------|---------|---------|---------|---------|---------|
| 0.56453 | 1.13627 | 0.47045 | 1.1603  | 0.47044 | 1.48741 | 0.47044 | 2.09642 |
| 0.56464 | 1.13672 | 0.47054 | 1.16085 | 0.47053 | 1.48796 | 0.47053 | 2.09687 |
| 0.56475 | 1.13709 | 0.47064 | 1.16112 | 0.47062 | 1.48805 | 0.47063 | 2.09742 |
| 0.56486 | 1.13736 | 0.47073 | 1.16148 | 0.47072 | 1.48832 | 0.47072 | 2.09797 |
| 0.56497 | 1.13781 | 0.47082 | 1.16175 | 0.47081 | 1.48887 | 0.47081 | 2.0986  |
| 0.56508 | 1.13818 | 0.47091 | 1.16239 | 0.4709  | 1.48941 | 0.4709  | 2.09951 |
| 0.5652  | 1.13855 | 0.471   | 1.16239 | 0.471   | 1.48941 | 0.471   | 2.10034 |
| 0.5653  | 1.139   | 0.4711  | 1.16276 | 0.47109 | 1.49006 | 0.47109 | 2.10097 |
| 0.56542 | 1.13927 | 0.47119 | 1.16339 | 0.47118 | 1.49079 | 0.47118 | 2.10142 |
| 0.56552 | 1.13954 | 0.47128 | 1.16366 | 0.47128 | 1.49106 | 0.47128 | 2.10215 |
| 0.56564 | 1.14    | 0.47137 | 1.16394 | 0.47137 | 1.49142 | 0.47137 | 2.10315 |
| 0.56575 | 1.14064 | 0.47147 | 1.1644  | 0.47146 | 1.49205 | 0.47146 | 2.10388 |
| 0.56586 | 1.14073 | 0.47156 | 1.16466 | 0.47155 | 1.49242 | 0.47155 | 2.1047  |
| 0.56597 | 1.141   | 0.47165 | 1.16503 | 0.47164 | 1.49278 | 0.47164 | 2.10497 |
| 0.56608 | 1.14155 | 0.47175 | 1.16558 | 0.47173 | 1.49324 | 0.47174 | 2.10543 |
| 0.5662  | 1.142   | 0.47184 | 1.16558 | 0.47183 | 1.49406 | 0.47183 | 2.10643 |
| 0.5663  | 1.14227 | 0.47193 | 1.16576 | 0.47192 | 1.49415 | 0.47192 | 2.10743 |
| 0.56642 | 1.14292 | 0.47202 | 1.16648 | 0.47201 | 1.49479 | 0.47201 | 2.10761 |
| 0.56652 | 1.14319 | 0.47212 | 1.16676 | 0.47211 | 1.49533 | 0.47211 | 2.10816 |
| 0.56664 | 1.14328 | 0.47221 | 1.16694 | 0.4722  | 1.49579 | 0.47221 | 2.10935 |
| 0.56675 | 1.14364 | 0.4723  | 1.16721 | 0.47229 | 1.49634 | 0.47229 | 2.1097  |
| 0.56686 | 1.1441  | 0.47239 | 1.16758 | 0.47238 | 1.4967  | 0.47239 | 2.11016 |
| 0.56697 | 1.14446 | 0.47248 | 1.16795 | 0.47248 | 1.49707 | 0.47248 | 2.11126 |
| 0.56708 | 1.14464 | 0.47258 | 1.1683  | 0.47257 | 1.49761 | 0.47257 | 2.11226 |
| 0.56719 | 1.14482 | 0.47267 | 1.16858 | 0.47266 | 1.49815 | 0.47266 | 2.1128  |
| 0.56731 | 1.14519 | 0.47276 | 1.16912 | 0.47276 | 1.49825 | 0.47276 | 2.11335 |
| 0.56741 | 1.14573 | 0.47286 | 1.16958 | 0.47284 | 1.49861 | 0.47285 | 2.11335 |
| 0.56753 | 1.14638 | 0.47295 | 1.16995 | 0.47294 | 1.49934 | 0.47294 | 2.11453 |
| 0.56764 | 1.14674 | 0.47304 | 1.17004 | 0.47303 | 1.4998  | 0.47304 | 2.11526 |
| 0.56775 | 1.14701 | 0.47313 | 1.17031 | 0.47312 | 1.49989 | 0.47312 | 2.11581 |
| 0.56786 | 1.14774 | 0.47323 | 1.17068 | 0.47322 | 1.50043 | 0.47322 | 2.1159  |
| 0.56797 | 1.14801 | 0.47332 | 1.17122 | 0.47331 | 1.5008  | 0.47332 | 2.11735 |
| 0.56808 | 1.14829 | 0.47341 | 1.17158 | 0.47341 | 1.50125 | 0.47341 | 2.11817 |
| 0.56819 | 1.14847 | 0.47351 | 1.17185 | 0.47349 | 1.50171 | 0.4735  | 2.11935 |
| 0.56831 | 1.14901 | 0.47359 | 1.17213 | 0.47359 | 1.50216 | 0.47359 | 2.11963 |
| 0.56841 | 1.14928 | 0.47369 | 1.1725  | 0.47368 | 1.50271 | 0.47368 | 2.11935 |
| 0.56853 | 1.14983 | 0.47378 | 1.17304 | 0.47377 | 1.50307 | 0.47377 | 2.12036 |
| 0.56863 | 1.1501  | 0.47388 | 1.17359 | 0.47387 | 1.50307 | 0.47387 | 2.12108 |
| 0.56875 | 1.15065 | 0.47396 | 1.17377 | 0.47396 | 1.50362 | 0.47396 | 2.12127 |
| 0.56885 | 1.15083 | 0.47406 | 1.17404 | 0.47405 | 1.50398 | 0.47405 | 2.12245 |
| 0.56897 | 1.15111 | 0.47415 | 1.17449 | 0.47414 | 1.50398 | 0.47415 | 2.12299 |
| 0.56908 | 1.15147 | 0.47424 | 1.17459 | 0.47424 | 1.50453 | 0.47424 | 2.12299 |
| 0.56919 | 1.15183 | 0.47434 | 1.17514 | 0.47433 | 1.50525 | 0.47433 | 2.1239  |
| 0.5693  | 1.1521  | 0.47443 | 1.17559 | 0.47442 | 1.50571 | 0.47442 | 2.124   |
| 0.56941 | 1.15257 | 0.47452 | 1.17586 | 0.47452 | 1.50599 | 0.47452 | 2.12537 |
| 0.56953 | 1.15302 | 0.47462 | 1.17595 | 0.4746  | 1.50671 | 0.47461 | 2.12591 |
| 0.56963 | 1.15375 | 0.47471 | 1.17641 | 0.4747  | 1.50707 | 0.4747  | 2.12663 |
| 0.56975 | 1.15393 | 0.4748  | 1.17686 | 0.47479 | 1.50753 | 0.47479 | 2.12754 |
| 0.56986 | 1.15402 | 0.47489 | 1.17732 | 0.47488 | 1.50807 | 0.47488 | 2.128   |
| 0.56997 | 1.15456 | 0.47499 | 1.17768 | 0.47498 | 1.50844 | 0.47498 | 2.12809 |
| 0.57008 | 1.1552  | 0.47508 | 1.17805 | 0.47507 | 1.50881 | 0.47508 | 2.12855 |
| 0.57019 | 1.15547 | 0.47517 | 1.17841 | 0.47516 | 1.50899 | 0.47516 | 2.12946 |
| 0.5703  | 1.15575 | 0.47527 | 1.17868 | 0.47525 | 1.50971 | 0.47526 | 2.1301  |
| 0.57042 | 1.15638 | 0.47535 | 1.17914 | 0.47535 | 1.51035 | 0.47535 | 2.13046 |

|         |         |         |         |         |         |         |         |
|---------|---------|---------|---------|---------|---------|---------|---------|
| 0.57052 | 1.15648 | 0.47545 | 1.17977 | 0.47544 | 1.51054 | 0.47544 | 2.13155 |
| 0.57064 | 1.15693 | 0.47554 | 1.17977 | 0.47553 | 1.51081 | 0.47553 | 2.13246 |
| 0.57075 | 1.15729 | 0.47564 | 1.18014 | 0.47563 | 1.51172 | 0.47563 | 2.13237 |
| 0.57086 | 1.15738 | 0.47573 | 1.1805  | 0.47572 | 1.51199 | 0.47572 | 2.13328 |
| 0.57097 | 1.15766 | 0.47582 | 1.18078 | 0.47581 | 1.51208 | 0.47581 | 2.13419 |
| 0.57108 | 1.15803 | 0.47591 | 1.18086 | 0.4759  | 1.51244 | 0.47591 | 2.13419 |
| 0.5712  | 1.1583  | 0.476   | 1.18124 | 0.476   | 1.51327 | 0.47599 | 2.13446 |
| 0.5713  | 1.15866 | 0.4761  | 1.18151 | 0.47609 | 1.51363 | 0.47609 | 2.13556 |
| 0.57142 | 1.15875 | 0.47619 | 1.18168 | 0.47618 | 1.51408 | 0.47618 | 2.1361  |
| 0.57152 | 1.15911 | 0.47628 | 1.18187 | 0.47627 | 1.51454 | 0.47627 | 2.13629 |
| 0.57164 | 1.15957 | 0.47638 | 1.18224 | 0.47637 | 1.51509 | 0.47637 | 2.13665 |
| 0.57174 | 1.16021 | 0.47647 | 1.18251 | 0.47646 | 1.51545 | 0.47646 | 2.13747 |
| 0.57186 | 1.16048 | 0.47656 | 1.18315 | 0.47655 | 1.51609 | 0.47655 | 2.13856 |
| 0.57197 | 1.16085 | 0.47665 | 1.18369 | 0.47664 | 1.51627 | 0.47664 | 2.13911 |
| 0.57208 | 1.1613  | 0.47675 | 1.18397 | 0.47674 | 1.51672 | 0.47674 | 2.13974 |
| 0.57219 | 1.16184 | 0.47684 | 1.18423 | 0.47683 | 1.51745 | 0.47683 | 2.14047 |
| 0.5723  | 1.1623  | 0.47693 | 1.1846  | 0.47692 | 1.51781 | 0.47692 | 2.14129 |
| 0.57241 | 1.16267 | 0.47703 | 1.18487 | 0.47701 | 1.51855 | 0.47702 | 2.14175 |
| 0.57253 | 1.16284 | 0.47712 | 1.18514 | 0.47711 | 1.51918 | 0.47711 | 2.14266 |
| 0.57264 | 1.16303 | 0.47721 | 1.1856  | 0.4772  | 1.51982 | 0.4772  | 2.14366 |
| 0.57275 | 1.16375 | 0.4773  | 1.18579 | 0.47729 | 1.52    | 0.47729 | 2.14429 |
| 0.57286 | 1.16403 | 0.47739 | 1.18615 | 0.47739 | 1.52082 | 0.47739 | 2.14493 |
| 0.57297 | 1.16448 | 0.47749 | 1.18669 | 0.47748 | 1.52073 | 0.47748 | 2.14566 |
| 0.57308 | 1.16494 | 0.47758 | 1.18715 | 0.47757 | 1.52109 | 0.47757 | 2.1463  |
| 0.57319 | 1.16503 | 0.47767 | 1.18742 | 0.47766 | 1.52155 | 0.47767 | 2.14675 |
| 0.57331 | 1.16531 | 0.47776 | 1.18761 | 0.47775 | 1.52182 | 0.47775 | 2.14766 |
| 0.57341 | 1.16595 | 0.47786 | 1.18797 | 0.47785 | 1.52227 | 0.47785 | 2.14802 |
| 0.57353 | 1.16622 | 0.47795 | 1.18833 | 0.47794 | 1.52283 | 0.47794 | 2.14893 |
| 0.57363 | 1.16658 | 0.47804 | 1.18878 | 0.47804 | 1.52319 | 0.47804 | 2.15003 |
| 0.57375 | 1.16694 | 0.47814 | 1.18915 | 0.47812 | 1.52373 | 0.47813 | 2.15048 |
| 0.57385 | 1.16721 | 0.47823 | 1.1897  | 0.47822 | 1.52428 | 0.47822 | 2.1513  |
| 0.57397 | 1.16767 | 0.47832 | 1.19024 | 0.47831 | 1.52482 | 0.47831 | 2.15194 |
| 0.57408 | 1.16786 | 0.47841 | 1.19052 | 0.4784  | 1.52555 | 0.4784  | 2.15212 |
| 0.57419 | 1.16849 | 0.47851 | 1.19052 | 0.4785  | 1.52601 | 0.4785  | 2.15231 |
| 0.5743  | 1.16894 | 0.4786  | 1.19079 | 0.47859 | 1.52619 | 0.47859 | 2.15348 |
| 0.57441 | 1.16949 | 0.47869 | 1.19124 | 0.47868 | 1.52655 | 0.47868 | 2.15376 |
| 0.57453 | 1.16985 | 0.47879 | 1.19142 | 0.47877 | 1.52719 | 0.47878 | 2.15422 |
| 0.57464 | 1.17013 | 0.47887 | 1.19179 | 0.47887 | 1.52728 | 0.47887 | 2.15485 |
| 0.57475 | 1.1705  | 0.47897 | 1.19234 | 0.47896 | 1.52755 | 0.47896 | 2.15549 |
| 0.57486 | 1.17068 | 0.47906 | 1.19279 | 0.47905 | 1.52819 | 0.47905 | 2.15649 |
| 0.57497 | 1.17086 | 0.47915 | 1.19279 | 0.47915 | 1.52856 | 0.47915 | 2.15758 |
| 0.57508 | 1.17141 | 0.47924 | 1.19325 | 0.47924 | 1.52937 | 0.47924 | 2.15813 |
| 0.57519 | 1.17158 | 0.47934 | 1.19397 | 0.47933 | 1.52974 | 0.47933 | 2.15904 |
| 0.5753  | 1.17195 | 0.47943 | 1.19434 | 0.47942 | 1.52983 | 0.47943 | 2.15968 |
| 0.57542 | 1.17222 | 0.47952 | 1.19461 | 0.47951 | 1.53038 | 0.47951 | 2.16004 |
| 0.57552 | 1.17241 | 0.47962 | 1.19489 | 0.47961 | 1.53102 | 0.47961 | 2.16077 |
| 0.57564 | 1.17286 | 0.47971 | 1.19507 | 0.4797  | 1.53138 | 0.4797  | 2.16186 |
| 0.57575 | 1.17349 | 0.4798  | 1.19553 | 0.4798  | 1.53184 | 0.4798  | 2.16249 |
| 0.57586 | 1.17395 | 0.4799  | 1.19607 | 0.47988 | 1.53238 | 0.47989 | 2.16332 |
| 0.57597 | 1.17395 | 0.47998 | 1.19625 | 0.47998 | 1.53266 | 0.47998 | 2.16377 |
| 0.57608 | 1.17422 | 0.48008 | 1.19661 | 0.48007 | 1.5332  | 0.48007 | 2.16395 |
| 0.5762  | 1.17468 | 0.48017 | 1.19744 | 0.48016 | 1.53347 | 0.48016 | 2.16468 |
| 0.5763  | 1.17486 | 0.48026 | 1.19771 | 0.48026 | 1.53384 | 0.48026 | 2.1655  |
| 0.57642 | 1.1755  | 0.48035 | 1.19807 | 0.48035 | 1.5342  | 0.48035 | 2.16687 |



|          |          |          |          |          |          |          |          |
|----------|----------|----------|----------|----------|----------|----------|----------|
| 0. 57652 | 1. 17559 | 0. 48045 | 1. 19852 | 0. 48044 | 1. 53474 | 0. 48044 | 2. 16769 |
| 0. 57664 | 1. 17568 | 0. 48055 | 1. 19889 | 0. 48053 | 1. 53511 | 0. 48054 | 2. 16832 |
| 0. 57675 | 1. 17632 | 0. 48063 | 1. 19907 | 0. 48063 | 1. 53575 | 0. 48063 | 2. 16923 |
| 0. 57686 | 1. 17686 | 0. 48073 | 1. 19943 | 0. 48072 | 1. 5362  | 0. 48072 | 2. 16987 |
| 0. 57697 | 1. 17677 | 0. 48082 | 1. 19989 | 0. 48081 | 1. 53657 | 0. 48081 | 2. 17041 |
| 0. 57708 | 1. 17741 | 0. 48091 | 1. 20026 | 0. 48091 | 1. 53665 | 0. 48091 | 2. 17032 |
| 0. 57719 | 1. 1776  | 0. 481   | 1. 20053 | 0. 481   | 1. 53684 | 0. 481   | 2. 17142 |
| 0. 5773  | 1. 17805 | 0. 4811  | 1. 20089 | 0. 48109 | 1. 53756 | 0. 48109 | 2. 1726  |
| 0. 57741 | 1. 17886 | 0. 48119 | 1. 20125 | 0. 48118 | 1. 53784 | 0. 48118 | 2. 17333 |
| 0. 57753 | 1. 17923 | 0. 48128 | 1. 20153 | 0. 48127 | 1. 53811 | 0. 48127 | 2. 17405 |
| 0. 57764 | 1. 17941 | 0. 48138 | 1. 20189 | 0. 48136 | 1. 5383  | 0. 48137 | 2. 17433 |
| 0. 57775 | 1. 17977 | 0. 48146 | 1. 20226 | 0. 48146 | 1. 53911 | 0. 48146 | 2. 17524 |
| 0. 57786 | 1. 1805  | 0. 48156 | 1. 20244 | 0. 48155 | 1. 53948 | 0. 48155 | 2. 17551 |
| 0. 57797 | 1. 18105 | 0. 48166 | 1. 20326 | 0. 48164 | 1. 53957 | 0. 48165 | 2. 17615 |
| 0. 57809 | 1. 18151 | 0. 48175 | 1. 20335 | 0. 48174 | 1. 54075 | 0. 48174 | 2. 17688 |
| 0. 57819 | 1. 18187 | 0. 48184 | 1. 20371 | 0. 48183 | 1. 54112 | 0. 48183 | 2. 17779 |
| 0. 57831 | 1. 18224 | 0. 48193 | 1. 20426 | 0. 48192 | 1. 54121 | 0. 48192 | 2. 17843 |
| 0. 57841 | 1. 18269 | 0. 48202 | 1. 20463 | 0. 48202 | 1. 54175 | 0. 48202 | 2. 1787  |
| 0. 57853 | 1. 18278 | 0. 48211 | 1. 2049  | 0. 48211 | 1. 54221 | 0. 48211 | 2. 17906 |
| 0. 57863 | 1. 18342 | 0. 48221 | 1. 20526 | 0. 4822  | 1. 54258 | 0. 4822  | 2. 17979 |
| 0. 57875 | 1. 18397 | 0. 4823  | 1. 20517 | 0. 48229 | 1. 54303 | 0. 4823  | 2. 17997 |
| 0. 57886 | 1. 18414 | 0. 48239 | 1. 20599 | 0. 48239 | 1. 5433  | 0. 48239 | 2. 1818  |
| 0. 57897 | 1. 18451 | 0. 48249 | 1. 20644 | 0. 48248 | 1. 54375 | 0. 48248 | 2. 18261 |
| 0. 57908 | 1. 18469 | 0. 48258 | 1. 20644 | 0. 48257 | 1. 5443  | 0. 48257 | 2. 18325 |
| 0. 57919 | 1. 18514 | 0. 48267 | 1. 2069  | 0. 48266 | 1. 54457 | 0. 48266 | 2. 18407 |
| 0. 5793  | 1. 18569 | 0. 48276 | 1. 20718 | 0. 48275 | 1. 54485 | 0. 48275 | 2. 18471 |
| 0. 57941 | 1. 18624 | 0. 48286 | 1. 20754 | 0. 48285 | 1. 5454  | 0. 48285 | 2. 18516 |
| 0. 57953 | 1. 1867  | 0. 48295 | 1. 2079  | 0. 48294 | 1. 54585 | 0. 48294 | 2. 1858  |
| 0. 57964 | 1. 18696 | 0. 48304 | 1. 20799 | 0. 48303 | 1. 54603 | 0. 48303 | 2. 18643 |
| 0. 57975 | 1. 18706 | 0. 48314 | 1. 20872 | 0. 48312 | 1. 54676 | 0. 48313 | 2. 18744 |
| 0. 57986 | 1. 18696 | 0. 48322 | 1. 20908 | 0. 48322 | 1. 5473  | 0. 48322 | 2. 18744 |
| 0. 57997 | 1. 18779 | 0. 48332 | 1. 20926 | 0. 48331 | 1. 54758 | 0. 48331 | 2. 18798 |
| 0. 58008 | 1. 18824 | 0. 48341 | 1. 20963 | 0. 4834  | 1. 54822 | 0. 4834  | 2. 18871 |
| 0. 58019 | 1. 18842 | 0. 48351 | 1. 21    | 0. 4835  | 1. 54849 | 0. 4835  | 2. 18898 |
| 0. 5803  | 1. 18869 | 0. 4836  | 1. 21    | 0. 48359 | 1. 54876 | 0. 48359 | 2. 18999 |
| 0. 58042 | 1. 18897 | 0. 48369 | 1. 21063 | 0. 48368 | 1. 54949 | 0. 48368 | 2. 19062 |
| 0. 58052 | 1. 18915 | 0. 48378 | 1. 21136 | 0. 48378 | 1. 54985 | 0. 48378 | 2. 19153 |
| 0. 58064 | 1. 1896  | 0. 48387 | 1. 21154 | 0. 48386 | 1. 55003 | 0. 48386 | 2. 19235 |
| 0. 58075 | 1. 18988 | 0. 48397 | 1. 21181 | 0. 48396 | 1. 55058 | 0. 48396 | 2. 19271 |
| 0. 58086 | 1. 19016 | 0. 48406 | 1. 21209 | 0. 48405 | 1. 55095 | 0. 48405 | 2. 19317 |
| 0. 58097 | 1. 19052 | 0. 48415 | 1. 21264 | 0. 48415 | 1. 5514  | 0. 48415 | 2. 19426 |
| 0. 58108 | 1. 19106 | 0. 48425 | 1. 213   | 0. 48423 | 1. 55167 | 0. 48424 | 2. 19472 |
| 0. 5812  | 1. 19124 | 0. 48434 | 1. 21336 | 0. 48433 | 1. 55222 | 0. 48433 | 2. 1949  |
| 0. 5813  | 1. 19152 | 0. 48443 | 1. 21364 | 0. 48442 | 1. 55313 | 0. 48442 | 2. 1959  |
| 0. 58142 | 1. 19225 | 0. 48452 | 1. 21391 | 0. 48451 | 1. 55376 | 0. 48451 | 2. 19654 |
| 0. 58152 | 1. 19225 | 0. 48462 | 1. 21436 | 0. 48461 | 1. 55404 | 0. 48461 | 2. 19708 |
| 0. 58164 | 1. 19297 | 0. 48471 | 1. 21482 | 0. 4847  | 1. 55431 | 0. 48471 | 2. 19808 |
| 0. 58175 | 1. 19325 | 0. 4848  | 1. 215   | 0. 48479 | 1. 55449 | 0. 48479 | 2. 19836 |
| 0. 58186 | 1. 1937  | 0. 48489 | 1. 21546 | 0. 48488 | 1. 55504 | 0. 48489 | 2. 19881 |
| 0. 58197 | 1. 19388 | 0. 48498 | 1. 21582 | 0. 48498 | 1. 55586 | 0. 48498 | 2. 19999 |
| 0. 58208 | 1. 19425 | 0. 48508 | 1. 21609 | 0. 48507 | 1. 5565  | 0. 48507 | 2. 20081 |
| 0. 58219 | 1. 19471 | 0. 48517 | 1. 21645 | 0. 48516 | 1. 55668 | 0. 48516 | 2. 20163 |
| 0. 5823  | 1. 19507 | 0. 48526 | 1. 21655 | 0. 48526 | 1. 55722 | 0. 48526 | 2. 20246 |
| 0. 58241 | 1. 19589 | 0. 48536 | 1. 21682 | 0. 48535 | 1. 55768 | 0. 48535 | 2. 20319 |

|         |         |         |         |         |         |         |         |
|---------|---------|---------|---------|---------|---------|---------|---------|
| 0.58253 | 1.19616 | 0.48545 | 1.21718 | 0.48544 | 1.55768 | 0.48544 | 2.20327 |
| 0.58264 | 1.19634 | 0.48554 | 1.21728 | 0.48554 | 1.55841 | 0.48554 | 2.20391 |
| 0.58275 | 1.19689 | 0.48563 | 1.21755 | 0.48562 | 1.55886 | 0.48562 | 2.20464 |
| 0.58286 | 1.19735 | 0.48573 | 1.21819 | 0.48572 | 1.5595  | 0.48572 | 2.20546 |
| 0.58297 | 1.19789 | 0.48582 | 1.21855 | 0.48581 | 1.55968 | 0.48581 | 2.20601 |
| 0.58309 | 1.19798 | 0.48591 | 1.21882 | 0.48591 | 1.56023 | 0.48591 | 2.20709 |
| 0.58319 | 1.19835 | 0.48601 | 1.21927 | 0.48599 | 1.56069 | 0.486   | 2.2081  |
| 0.58331 | 1.19889 | 0.48609 | 1.21964 | 0.48609 | 1.56123 | 0.48609 | 2.20855 |
| 0.58341 | 1.19907 | 0.48619 | 1.22001 | 0.48618 | 1.56132 | 0.48618 | 2.20919 |
| 0.58353 | 1.1998  | 0.48628 | 1.22046 | 0.48627 | 1.56178 | 0.48627 | 2.21001 |
| 0.58363 | 1.20017 | 0.48638 | 1.22073 | 0.48637 | 1.56233 | 0.48637 | 2.21047 |
| 0.58375 | 1.20089 | 0.48647 | 1.22101 | 0.48646 | 1.5626  | 0.48646 | 2.21101 |
| 0.58386 | 1.20125 | 0.48656 | 1.22155 | 0.48655 | 1.56305 | 0.48655 | 2.21174 |
| 0.58397 | 1.20171 | 0.48665 | 1.2221  | 0.48664 | 1.56342 | 0.48665 | 2.21283 |
| 0.58408 | 1.20153 | 0.48674 | 1.22219 | 0.48674 | 1.56423 | 0.48674 | 2.2132  |
| 0.58419 | 1.20189 | 0.48684 | 1.22273 | 0.48683 | 1.5646  | 0.48683 | 2.21374 |
| 0.5843  | 1.20272 | 0.48693 | 1.22319 | 0.48692 | 1.56469 | 0.48693 | 2.21465 |
| 0.58441 | 1.2028  | 0.48702 | 1.22355 | 0.48702 | 1.56542 | 0.48702 | 2.21565 |
| 0.58453 | 1.20335 | 0.48712 | 1.22383 | 0.48711 | 1.56588 | 0.48711 | 2.2161  |
| 0.58464 | 1.20389 | 0.48721 | 1.2241  | 0.4872  | 1.56596 | 0.4872  | 2.21638 |
| 0.58475 | 1.20417 | 0.4873  | 1.22438 | 0.4873  | 1.56678 | 0.4873  | 2.21711 |
| 0.58486 | 1.20436 | 0.48739 | 1.22501 | 0.48739 | 1.56761 | 0.48739 | 2.21829 |
| 0.58497 | 1.20481 | 0.48749 | 1.22556 | 0.48748 | 1.56806 | 0.48748 | 2.21966 |
| 0.58508 | 1.20553 | 0.48758 | 1.22556 | 0.48757 | 1.56861 | 0.48757 | 2.22029 |
| 0.58519 | 1.20581 | 0.48767 | 1.22601 | 0.48766 | 1.56878 | 0.48766 | 2.22057 |
| 0.5853  | 1.20608 | 0.48777 | 1.22628 | 0.48775 | 1.56915 | 0.48776 | 2.22184 |
| 0.58542 | 1.20672 | 0.48785 | 1.22665 | 0.48785 | 1.56933 | 0.48785 | 2.2222  |
| 0.58552 | 1.20718 | 0.48795 | 1.22702 | 0.48794 | 1.56997 | 0.48794 | 2.22284 |
| 0.58564 | 1.20763 | 0.48804 | 1.22729 | 0.48803 | 1.57043 | 0.48803 | 2.22348 |
| 0.58575 | 1.20826 | 0.48813 | 1.22756 | 0.48813 | 1.57043 | 0.48813 | 2.22403 |
| 0.58586 | 1.20845 | 0.48823 | 1.22783 | 0.48822 | 1.57088 | 0.48822 | 2.22502 |
| 0.58597 | 1.20872 | 0.48832 | 1.2282  | 0.48831 | 1.57142 | 0.48831 | 2.22567 |
| 0.58608 | 1.20917 | 0.48842 | 1.22883 | 0.4884  | 1.57206 | 0.48841 | 2.22657 |
| 0.5862  | 1.20954 | 0.4885  | 1.22901 | 0.4885  | 1.57243 | 0.48849 | 2.22748 |
| 0.5863  | 1.20972 | 0.4886  | 1.22947 | 0.48859 | 1.57306 | 0.48859 | 2.22821 |
| 0.58642 | 1.21027 | 0.48869 | 1.22975 | 0.48868 | 1.57361 | 0.48868 | 2.22894 |
| 0.58652 | 1.21091 | 0.48878 | 1.23029 | 0.48878 | 1.57424 | 0.48878 | 2.22985 |
| 0.58664 | 1.21118 | 0.48888 | 1.23047 | 0.48887 | 1.57507 | 0.48887 | 2.23122 |
| 0.58675 | 1.21163 | 0.48897 | 1.23092 | 0.48896 | 1.5757  | 0.48896 | 2.23122 |
| 0.58686 | 1.21181 | 0.48906 | 1.23147 | 0.48906 | 1.57607 | 0.48906 | 2.23203 |
| 0.58697 | 1.21218 | 0.48915 | 1.23202 | 0.48914 | 1.57661 | 0.48914 | 2.2324  |
| 0.58708 | 1.21282 | 0.48925 | 1.23247 | 0.48924 | 1.57716 | 0.48924 | 2.23313 |
| 0.58719 | 1.21336 | 0.48934 | 1.23275 | 0.48933 | 1.57725 | 0.48933 | 2.23377 |
| 0.5873  | 1.21391 | 0.48943 | 1.23302 | 0.48942 | 1.57761 | 0.48942 | 2.23422 |
| 0.58741 | 1.21437 | 0.48953 | 1.23348 | 0.48951 | 1.57835 | 0.48952 | 2.23449 |
| 0.58753 | 1.21437 | 0.48961 | 1.23375 | 0.48961 | 1.57916 | 0.48961 | 2.2355  |
| 0.58764 | 1.21464 | 0.48971 | 1.23403 | 0.4897  | 1.57916 | 0.4897  | 2.23632 |
| 0.58775 | 1.21519 | 0.4898  | 1.23466 | 0.48979 | 1.57962 | 0.48979 | 2.23668 |
| 0.58786 | 1.21555 | 0.48989 | 1.23494 | 0.48989 | 1.57998 | 0.48989 | 2.23749 |
| 0.58797 | 1.21601 | 0.48999 | 1.23539 | 0.48998 | 1.58043 | 0.48998 | 2.23822 |
| 0.58808 | 1.21645 | 0.49008 | 1.23566 | 0.49007 | 1.58116 | 0.49007 | 2.23904 |
| 0.58819 | 1.217   | 0.49017 | 1.23593 | 0.49016 | 1.58144 | 0.49017 | 2.2394  |
| 0.58831 | 1.21728 | 0.49026 | 1.23639 | 0.49025 | 1.5818  | 0.49025 | 2.24077 |
| 0.58841 | 1.21783 | 0.49036 | 1.23694 | 0.49035 | 1.58162 | 0.49035 | 2.24132 |

|         |         |         |         |         |         |         |         |
|---------|---------|---------|---------|---------|---------|---------|---------|
| 0.58853 | 1.21783 | 0.49045 | 1.23712 | 0.49044 | 1.58262 | 0.49044 | 2.24177 |
| 0.58863 | 1.21837 | 0.49054 | 1.2373  | 0.49053 | 1.58299 | 0.49053 | 2.24251 |
| 0.58875 | 1.21891 | 0.49064 | 1.23767 | 0.49062 | 1.58344 | 0.49063 | 2.24332 |
| 0.58886 | 1.21964 | 0.49073 | 1.23812 | 0.49072 | 1.58353 | 0.49072 | 2.24414 |
| 0.58897 | 1.22001 | 0.49082 | 1.23866 | 0.49082 | 1.58398 | 0.49082 | 2.24523 |
| 0.58908 | 1.22028 | 0.49091 | 1.23921 | 0.4909  | 1.58499 | 0.4909  | 2.24587 |
| 0.58919 | 1.22073 | 0.491   | 1.23921 | 0.491   | 1.58526 | 0.491   | 2.24641 |
| 0.5893  | 1.22128 | 0.49109 | 1.23939 | 0.49109 | 1.58545 | 0.49109 | 2.24723 |
| 0.58941 | 1.22164 | 0.49119 | 1.23967 | 0.49118 | 1.58626 | 0.49118 | 2.24742 |
| 0.58953 | 1.2221  | 0.49128 | 1.23994 | 0.49127 | 1.58708 | 0.49128 | 2.24823 |
| 0.58963 | 1.22247 | 0.49137 | 1.24049 | 0.49137 | 1.58708 | 0.49137 | 2.24923 |
| 0.58975 | 1.22292 | 0.49147 | 1.24085 | 0.49146 | 1.58754 | 0.49146 | 2.2497  |
| 0.58986 | 1.22283 | 0.49156 | 1.24121 | 0.49155 | 1.58772 | 0.49155 | 2.25124 |
| 0.58997 | 1.22328 | 0.49165 | 1.2413  | 0.49165 | 1.58808 | 0.49165 | 2.25187 |
| 0.59008 | 1.22365 | 0.49175 | 1.24194 | 0.49173 | 1.58845 | 0.49173 | 2.25169 |
| 0.59019 | 1.2242  | 0.49184 | 1.2424  | 0.49183 | 1.58908 | 0.49183 | 2.25224 |
| 0.5903  | 1.22455 | 0.49193 | 1.24249 | 0.49192 | 1.58926 | 0.49193 | 2.25306 |
| 0.59042 | 1.2251  | 0.49202 | 1.24285 | 0.49202 | 1.58963 | 0.49202 | 2.25343 |
| 0.59052 | 1.22538 | 0.49212 | 1.24322 | 0.49211 | 1.59036 | 0.49211 | 2.25397 |
| 0.59064 | 1.22574 | 0.49221 | 1.24358 | 0.4922  | 1.59072 | 0.4922  | 2.25516 |
| 0.59075 | 1.22628 | 0.4923  | 1.24404 | 0.49229 | 1.59145 | 0.49229 | 2.25542 |
| 0.59086 | 1.22665 | 0.4924  | 1.2444  | 0.49238 | 1.5919  | 0.49239 | 2.25624 |
| 0.59097 | 1.22702 | 0.49249 | 1.24477 | 0.49248 | 1.59236 | 0.49248 | 2.25715 |
| 0.59108 | 1.22774 | 0.49258 | 1.24513 | 0.49257 | 1.59273 | 0.49257 | 2.25761 |
| 0.5912  | 1.22802 | 0.49267 | 1.2454  | 0.49266 | 1.59336 | 0.49266 | 2.25788 |
| 0.5913  | 1.22829 | 0.49276 | 1.24603 | 0.49276 | 1.59381 | 0.49276 | 2.25871 |
| 0.59142 | 1.22856 | 0.49285 | 1.24622 | 0.49285 | 1.59391 | 0.49285 | 2.25871 |
| 0.59152 | 1.22911 | 0.49295 | 1.24668 | 0.49294 | 1.59464 | 0.49294 | 2.25943 |
| 0.59164 | 1.22948 | 0.49305 | 1.24695 | 0.49303 | 1.595   | 0.49304 | 2.26016 |
| 0.59175 | 1.22984 | 0.49313 | 1.24731 | 0.49313 | 1.59527 | 0.49313 | 2.2607  |
| 0.59186 | 1.2303  | 0.49323 | 1.24776 | 0.49322 | 1.59591 | 0.49322 | 2.26134 |
| 0.59197 | 1.23038 | 0.49332 | 1.24786 | 0.49331 | 1.59609 | 0.49331 | 2.26207 |
| 0.59208 | 1.23111 | 0.49341 | 1.24804 | 0.49341 | 1.59682 | 0.4934  | 2.26362 |
| 0.59219 | 1.23129 | 0.4935  | 1.24858 | 0.49349 | 1.59718 | 0.4935  | 2.26426 |
| 0.5923  | 1.23175 | 0.4936  | 1.24904 | 0.49359 | 1.59728 | 0.49359 | 2.26489 |
| 0.59241 | 1.2323  | 0.49369 | 1.24932 | 0.49368 | 1.598   | 0.49369 | 2.26589 |
| 0.59253 | 1.23257 | 0.49378 | 1.24941 | 0.49378 | 1.59855 | 0.49377 | 2.2669  |
| 0.59264 | 1.23293 | 0.49388 | 1.24968 | 0.49387 | 1.59873 | 0.49387 | 2.26753 |
| 0.59275 | 1.23338 | 0.49396 | 1.25023 | 0.49396 | 1.59946 | 0.49396 | 2.26844 |
| 0.59286 | 1.23357 | 0.49406 | 1.25086 | 0.49405 | 1.59974 | 0.49405 | 2.2689  |
| 0.59297 | 1.2343  | 0.49415 | 1.25113 | 0.49414 | 1.60073 | 0.49415 | 2.26972 |
| 0.59309 | 1.23484 | 0.49425 | 1.25159 | 0.49424 | 1.60182 | 0.49424 | 2.27053 |
| 0.59319 | 1.23503 | 0.49434 | 1.25186 | 0.49433 | 1.60246 | 0.49433 | 2.27135 |
| 0.59331 | 1.2352  | 0.49443 | 1.25223 | 0.49442 | 1.60283 | 0.49442 | 2.27226 |
| 0.59341 | 1.23585 | 0.49452 | 1.25277 | 0.49452 | 1.60301 | 0.49452 | 2.27299 |
| 0.59353 | 1.2363  | 0.49461 | 1.25295 | 0.49461 | 1.60338 | 0.49461 | 2.27372 |
| 0.59363 | 1.23685 | 0.49471 | 1.25313 | 0.4947  | 1.60392 | 0.4947  | 2.27417 |
| 0.59375 | 1.23721 | 0.4948  | 1.25323 | 0.49479 | 1.60438 | 0.4948  | 2.27445 |
| 0.59386 | 1.23767 | 0.49489 | 1.25359 | 0.49488 | 1.60438 | 0.49488 | 2.27527 |
| 0.59397 | 1.23793 | 0.49499 | 1.25414 | 0.49498 | 1.60483 | 0.49498 | 2.27655 |
| 0.59408 | 1.23848 | 0.49508 | 1.25441 | 0.49507 | 1.60592 | 0.49507 | 2.27727 |
| 0.59419 | 1.23903 | 0.49517 | 1.25505 | 0.49516 | 1.60637 | 0.49516 | 2.27754 |
| 0.5943  | 1.2394  | 0.49526 | 1.25559 | 0.49525 | 1.60674 | 0.49526 | 2.27864 |
| 0.59441 | 1.23994 | 0.49536 | 1.25568 | 0.49535 | 1.60747 | 0.49535 | 2.27891 |

|          |          |          |          |          |          |          |          |
|----------|----------|----------|----------|----------|----------|----------|----------|
| 0. 59453 | 1. 24022 | 0. 49545 | 1. 25632 | 0. 49544 | 1. 60783 | 0. 49545 | 2. 27963 |
| 0. 59464 | 1. 24076 | 0. 49554 | 1. 25678 | 0. 49553 | 1. 60793 | 0. 49553 | 2. 28064 |
| 0. 59475 | 1. 24103 | 0. 49564 | 1. 25705 | 0. 49563 | 1. 60856 | 0. 49563 | 2. 28092 |
| 0. 59486 | 1. 24121 | 0. 49573 | 1. 25733 | 0. 49572 | 1. 6091  | 0. 49572 | 2. 28164 |
| 0. 59497 | 1. 24176 | 0. 49582 | 1. 25778 | 0. 49581 | 1. 60938 | 0. 49581 | 2. 28282 |
| 0. 59508 | 1. 24231 | 0. 49591 | 1. 25832 | 0. 4959  | 1. 60975 | 0. 49591 | 2. 28364 |
| 0. 59519 | 1. 2424  | 0. 49601 | 1. 25841 | 0. 496   | 1. 61011 | 0. 496   | 2. 28455 |
| 0. 5953  | 1. 24286 | 0. 4961  | 1. 25887 | 0. 49609 | 1. 61056 | 0. 49609 | 2. 28547 |
| 0. 59542 | 1. 24367 | 0. 49619 | 1. 25932 | 0. 49618 | 1. 6112  | 0. 49618 | 2. 28601 |
| 0. 59552 | 1. 24404 | 0. 49628 | 1. 25978 | 0. 49628 | 1. 61174 | 0. 49628 | 2. 28682 |
| 0. 59564 | 1. 24431 | 0. 49637 | 1. 26023 | 0. 49636 | 1. 6122  | 0. 49636 | 2. 28774 |
| 0. 59575 | 1. 24494 | 0. 49647 | 1. 26042 | 0. 49646 | 1. 61302 | 0. 49646 | 2. 28838 |
| 0. 59586 | 1. 24558 | 0. 49656 | 1. 26078 | 0. 49655 | 1. 61356 | 0. 49656 | 2. 28929 |
| 0. 59597 | 1. 24558 | 0. 49665 | 1. 26151 | 0. 49665 | 1. 61384 | 0. 49665 | 2. 29056 |
| 0. 59608 | 1. 24594 | 0. 49675 | 1. 26197 | 0. 49673 | 1. 61439 | 0. 49674 | 2. 29093 |
| 0. 5962  | 1. 24604 | 0. 49684 | 1. 26224 | 0. 49683 | 1. 61475 | 0. 49683 | 2. 29138 |
| 0. 5963  | 1. 24631 | 0. 49693 | 1. 26269 | 0. 49692 | 1. 6153  | 0. 49692 | 2. 29238 |
| 0. 59642 | 1. 24659 | 0. 49702 | 1. 26315 | 0. 49701 | 1. 61584 | 0. 49701 | 2. 29302 |
| 0. 59652 | 1. 24722 | 0. 49712 | 1. 26351 | 0. 49711 | 1. 6163  | 0. 49711 | 2. 29365 |
| 0. 59664 | 1. 24759 | 0. 49721 | 1. 26379 | 0. 4972  | 1. 61685 | 0. 49721 | 2. 29521 |
| 0. 59675 | 1. 24795 | 0. 4973  | 1. 26406 | 0. 49729 | 1. 6173  | 0. 49729 | 2. 29629 |
| 0. 59686 | 1. 24841 | 0. 4974  | 1. 26442 | 0. 49739 | 1. 61784 | 0. 49739 | 2. 2972  |
| 0. 59697 | 1. 24876 | 0. 49748 | 1. 26488 | 0. 49748 | 1. 6183  | 0. 49748 | 2. 29766 |
| 0. 59708 | 1. 24932 | 0. 49758 | 1. 26533 | 0. 49757 | 1. 61894 | 0. 49757 | 2. 29866 |
| 0. 59719 | 1. 24968 | 0. 49767 | 1. 26597 | 0. 49766 | 1. 61949 | 0. 49766 | 2. 29893 |
| 0. 5973  | 1. 25004 | 0. 49776 | 1. 26606 | 0. 49776 | 1. 62021 | 0. 49776 | 2. 29984 |
| 0. 59741 | 1. 25086 | 0. 49786 | 1. 26652 | 0. 49785 | 1. 62085 | 0. 49785 | 2. 30048 |
| 0. 59753 | 1. 25141 | 0. 49795 | 1. 2667  | 0. 49794 | 1. 62121 | 0. 49794 | 2. 30111 |
| 0. 59764 | 1. 25168 | 0. 49804 | 1. 26716 | 0. 49804 | 1. 62167 | 0. 49804 | 2. 30175 |
| 0. 59775 | 1. 25223 | 0. 49813 | 1. 2677  | 0. 49812 | 1. 62203 | 0. 49812 | 2. 30258 |
| 0. 59786 | 1. 25223 | 0. 49823 | 1. 26797 | 0. 49822 | 1. 62213 | 0. 49822 | 2. 30321 |
| 0. 59797 | 1. 25268 | 0. 49832 | 1. 26843 | 0. 49831 | 1. 62231 | 0. 49832 | 2. 30449 |
| 0. 59808 | 1. 25305 | 0. 49841 | 1. 26861 | 0. 49841 | 1. 6233  | 0. 49841 | 2. 30494 |
| 0. 59819 | 1. 25359 | 0. 49851 | 1. 26916 | 0. 49849 | 1. 62358 | 0. 4985  | 2. 30549 |
| 0. 59831 | 1. 25432 | 0. 49859 | 1. 26961 | 0. 49859 | 1. 62385 | 0. 49859 | 2. 3063  |
| 0. 59841 | 1. 25477 | 0. 49869 | 1. 26961 | 0. 49869 | 1. 62394 | 0. 49868 | 2. 3074  |
| 0. 59853 | 1. 25496 | 0. 49878 | 1. 26989 | 0. 49877 | 1. 62449 | 0. 49877 | 2. 30786 |
| 0. 59863 | 1. 25505 | 0. 49887 | 1. 27024 | 0. 49887 | 1. 62494 | 0. 49887 | 2. 30831 |
| 0. 59875 | 1. 2555  | 0. 49897 | 1. 27079 | 0. 49896 | 1. 62558 | 0. 49896 | 2. 30913 |
| 0. 59886 | 1. 25587 | 0. 49906 | 1. 27097 | 0. 49905 | 1. 62603 | 0. 49905 | 2. 30967 |
| 0. 59897 | 1. 25632 | 0. 49916 | 1. 27125 | 0. 49914 | 1. 62631 | 0. 49915 | 2. 31022 |
| 0. 59908 | 1. 25678 | 0. 49924 | 1. 27162 | 0. 49924 | 1. 62631 | 0. 49924 | 2. 31186 |
| 0. 59919 | 1. 25714 | 0. 49934 | 1. 27198 | 0. 49933 | 1. 6274  | 0. 49933 | 2. 31268 |
| 0. 5993  | 1. 2576  | 0. 49943 | 1. 27234 | 0. 49942 | 1. 62813 | 0. 49942 | 2. 31313 |
| 0. 59941 | 1. 25832 | 0. 49952 | 1. 27298 | 0. 49952 | 1. 62886 | 0. 49952 | 2. 31377 |
| 0. 59953 | 1. 25924 | 0. 49962 | 1. 27325 | 0. 4996  | 1. 62922 | 0. 49961 | 2. 3144  |
| 0. 59964 | 1. 25951 | 0. 49971 | 1. 27371 | 0. 4997  | 1. 62922 | 0. 4997  | 2. 31514 |
| 0. 59975 | 1. 26014 | 0. 4998  | 1. 27407 | 0. 49979 | 1. 62977 | 0. 49979 | 2. 31632 |
| 0. 59986 | 1. 26006 | 0. 49989 | 1. 27453 | 0. 49988 | 1. 6304  | 0. 49988 | 2. 31695 |
| 0. 59997 | 1. 26014 | 0. 49999 | 1. 27471 | 0. 49998 | 1. 63077 | 0. 49998 | 2. 31704 |
| 0. 60008 | 1. 26087 | 0. 50008 | 1. 27507 | 0. 50007 | 1. 6314  | 0. 50007 | 2. 31768 |
| 0. 60019 | 1. 26124 | 0. 50017 | 1. 27543 | 0. 50016 | 1. 63195 | 0. 50016 | 2. 31859 |
| 0. 6003  | 1. 26188 | 0. 50027 | 1. 27589 | 0. 50025 | 1. 63241 | 0. 50026 | 2. 31932 |
| 0. 60042 | 1. 26224 | 0. 50036 | 1. 27635 | 0. 50035 | 1. 63296 | 0. 50035 | 2. 31932 |

|         |         |         |         |         |         |         |         |
|---------|---------|---------|---------|---------|---------|---------|---------|
| 0.60052 | 1.26242 | 0.50045 | 1.27644 | 0.50044 | 1.63359 | 0.50044 | 2.31996 |
| 0.60064 | 1.26287 | 0.50054 | 1.27671 | 0.50053 | 1.63386 | 0.50053 | 2.32123 |
| 0.60075 | 1.26342 | 0.50063 | 1.27689 | 0.50063 | 1.63468 | 0.50063 | 2.32196 |
| 0.60086 | 1.26379 | 0.50073 | 1.27735 | 0.50072 | 1.63523 | 0.50072 | 2.32232 |
| 0.60097 | 1.26443 | 0.50082 | 1.27798 | 0.50081 | 1.63541 | 0.50081 | 2.32324 |
| 0.60108 | 1.26497 | 0.50091 | 1.27853 | 0.50091 | 1.63559 | 0.50091 | 2.3236  |
| 0.6012  | 1.26533 | 0.501   | 1.27889 | 0.501   | 1.63623 | 0.50099 | 2.32423 |
| 0.6013  | 1.26579 | 0.5011  | 1.27935 | 0.50109 | 1.63678 | 0.50109 | 2.32515 |
| 0.60142 | 1.26643 | 0.50119 | 1.27962 | 0.50118 | 1.6375  | 0.50118 | 2.32642 |
| 0.60152 | 1.26679 | 0.50128 | 1.2798  | 0.50128 | 1.63787 | 0.50128 | 2.32661 |
| 0.60164 | 1.26724 | 0.50138 | 1.28008 | 0.50137 | 1.63814 | 0.50137 | 2.32724 |
| 0.60174 | 1.26752 | 0.50147 | 1.28053 | 0.50146 | 1.63851 | 0.50146 | 2.32852 |
| 0.60186 | 1.26815 | 0.50156 | 1.28071 | 0.50156 | 1.63887 | 0.50156 | 2.32915 |
| 0.60197 | 1.26843 | 0.50165 | 1.28117 | 0.50164 | 1.63924 | 0.50164 | 2.33016 |
| 0.60208 | 1.26889 | 0.50175 | 1.28126 | 0.50174 | 1.64005 | 0.50174 | 2.33088 |
| 0.60219 | 1.26925 | 0.50184 | 1.28172 | 0.50183 | 1.6406  | 0.50183 | 2.33161 |
| 0.6023  | 1.26989 | 0.50193 | 1.28217 | 0.50192 | 1.64069 | 0.50192 | 2.33197 |
| 0.60241 | 1.27025 | 0.50203 | 1.28244 | 0.50201 | 1.64087 | 0.50202 | 2.33315 |
| 0.60253 | 1.27052 | 0.50212 | 1.28272 | 0.50211 | 1.6416  | 0.50211 | 2.33398 |
| 0.60264 | 1.27079 | 0.50221 | 1.28317 | 0.5022  | 1.64215 | 0.5022  | 2.33434 |
| 0.60275 | 1.27134 | 0.5023  | 1.28326 | 0.50229 | 1.64279 | 0.50229 | 2.33525 |
| 0.60286 | 1.2718  | 0.50239 | 1.28363 | 0.50239 | 1.64333 | 0.50239 | 2.33625 |
| 0.60297 | 1.27207 | 0.50249 | 1.28418 | 0.50247 | 1.6436  | 0.50248 | 2.33652 |
| 0.60309 | 1.27289 | 0.50258 | 1.28463 | 0.50257 | 1.64415 | 0.50257 | 2.33753 |
| 0.60319 | 1.27343 | 0.50267 | 1.28499 | 0.50266 | 1.64451 | 0.50267 | 2.33816 |
| 0.60331 | 1.27398 | 0.50276 | 1.28581 | 0.50275 | 1.64497 | 0.50275 | 2.3388  |
| 0.60341 | 1.27462 | 0.50286 | 1.28618 | 0.50285 | 1.64588 | 0.50285 | 2.33952 |
| 0.60353 | 1.27507 | 0.50295 | 1.28636 | 0.50294 | 1.64643 | 0.50294 | 2.33962 |
| 0.60363 | 1.27543 | 0.50304 | 1.28663 | 0.50304 | 1.64688 | 0.50304 | 2.34107 |
| 0.60375 | 1.27626 | 0.50314 | 1.28681 | 0.50312 | 1.64734 | 0.50313 | 2.34189 |
| 0.60386 | 1.27644 | 0.50323 | 1.28754 | 0.50322 | 1.64788 | 0.50322 | 2.34253 |
| 0.60397 | 1.2769  | 0.50332 | 1.28782 | 0.50332 | 1.64824 | 0.50332 | 2.34326 |
| 0.60408 | 1.27772 | 0.50341 | 1.28818 | 0.5034  | 1.6487  | 0.5034  | 2.34408 |
| 0.60419 | 1.27835 | 0.5035  | 1.28873 | 0.5035  | 1.64907 | 0.5035  | 2.34481 |
| 0.6043  | 1.27872 | 0.5036  | 1.28882 | 0.50359 | 1.64961 | 0.50359 | 2.3459  |
| 0.60441 | 1.27899 | 0.50369 | 1.28918 | 0.50368 | 1.65024 | 0.50368 | 2.34617 |
| 0.60453 | 1.27999 | 0.50379 | 1.28954 | 0.50377 | 1.65097 | 0.50378 | 2.34644 |
| 0.60464 | 1.28017 | 0.50387 | 1.29    | 0.50387 | 1.65115 | 0.50387 | 2.34708 |
| 0.60475 | 1.28053 | 0.50397 | 1.29045 | 0.50396 | 1.65171 | 0.50396 | 2.34854 |
| 0.60486 | 1.28117 | 0.50406 | 1.29082 | 0.50405 | 1.65252 | 0.50405 | 2.3489  |
| 0.60497 | 1.28172 | 0.50415 | 1.29118 | 0.50415 | 1.65289 | 0.50415 | 2.35017 |
| 0.60508 | 1.28181 | 0.50425 | 1.29146 | 0.50423 | 1.65334 | 0.50424 | 2.35173 |
| 0.60519 | 1.28172 | 0.50434 | 1.29173 | 0.50433 | 1.65398 | 0.50433 | 2.35264 |
| 0.6053  | 1.28227 | 0.50443 | 1.29218 | 0.50442 | 1.65425 | 0.50443 | 2.35318 |
| 0.60542 | 1.28281 | 0.50452 | 1.29264 | 0.50451 | 1.65471 | 0.50451 | 2.35427 |
| 0.60552 | 1.28326 | 0.50462 | 1.293   | 0.50461 | 1.65498 | 0.50461 | 2.355   |
| 0.60564 | 1.28326 | 0.50471 | 1.29318 | 0.5047  | 1.65526 | 0.5047  | 2.35563 |
| 0.60575 | 1.28381 | 0.5048  | 1.29337 | 0.5048  | 1.65598 | 0.5048  | 2.35636 |
| 0.60586 | 1.28435 | 0.5049  | 1.29382 | 0.50488 | 1.6568  | 0.50489 | 2.35746 |
| 0.60597 | 1.28472 | 0.50499 | 1.29428 | 0.50498 | 1.65689 | 0.50498 | 2.3581  |
| 0.60608 | 1.2849  | 0.50508 | 1.29473 | 0.50507 | 1.65753 | 0.50507 | 2.35846 |
| 0.6062  | 1.28517 | 0.50517 | 1.29527 | 0.50516 | 1.65798 | 0.50516 | 2.35964 |
| 0.6063  | 1.28572 | 0.50526 | 1.29537 | 0.50526 | 1.65834 | 0.50526 | 2.36065 |
| 0.60642 | 1.28609 | 0.50536 | 1.29564 | 0.50535 | 1.65908 | 0.50535 | 2.36174 |

|         |         |         |         |         |         |         |         |
|---------|---------|---------|---------|---------|---------|---------|---------|
| 0.60652 | 1.28645 | 0.50545 | 1.2961  | 0.50544 | 1.65962 | 0.50544 | 2.3631  |
| 0.60664 | 1.28691 | 0.50554 | 1.29646 | 0.50553 | 1.66017 | 0.50554 | 2.36383 |
| 0.60675 | 1.28772 | 0.50563 | 1.29691 | 0.50563 | 1.66071 | 0.50563 | 2.36465 |
| 0.60686 | 1.28782 | 0.50573 | 1.29728 | 0.50572 | 1.66098 | 0.50572 | 2.36519 |
| 0.60697 | 1.28836 | 0.50582 | 1.29782 | 0.50581 | 1.66172 | 0.50581 | 2.36629 |
| 0.60708 | 1.28873 | 0.50591 | 1.2981  | 0.50591 | 1.66236 | 0.5059  | 2.3672  |
| 0.60719 | 1.28909 | 0.506   | 1.29847 | 0.50599 | 1.66263 | 0.506   | 2.36765 |
| 0.60731 | 1.28973 | 0.5061  | 1.29865 | 0.50609 | 1.66318 | 0.50609 | 2.3682  |
| 0.60741 | 1.29009 | 0.50619 | 1.29892 | 0.50618 | 1.66344 | 0.50618 | 2.36901 |
| 0.60753 | 1.29054 | 0.50628 | 1.29938 | 0.50627 | 1.66399 | 0.50627 | 2.36983 |
| 0.60764 | 1.29082 | 0.50638 | 1.29973 | 0.50637 | 1.66454 | 0.50637 | 2.37038 |
| 0.60775 | 1.29173 | 0.50647 | 1.30028 | 0.50646 | 1.66517 | 0.50646 | 2.37156 |
| 0.60786 | 1.29227 | 0.50656 | 1.30055 | 0.50655 | 1.66636 | 0.50655 | 2.37202 |
| 0.60797 | 1.29273 | 0.50666 | 1.30092 | 0.50664 | 1.66663 | 0.50665 | 2.37266 |
| 0.60809 | 1.29282 | 0.50674 | 1.3011  | 0.50674 | 1.66663 | 0.50674 | 2.37357 |
| 0.60819 | 1.29327 | 0.50684 | 1.30156 | 0.50683 | 1.66663 | 0.50683 | 2.37466 |
| 0.60831 | 1.29392 | 0.50693 | 1.30193 | 0.50692 | 1.66736 | 0.50692 | 2.37576 |
| 0.60841 | 1.29455 | 0.50703 | 1.30228 | 0.50702 | 1.66808 | 0.50702 | 2.37667 |
| 0.60853 | 1.29473 | 0.50711 | 1.30274 | 0.50711 | 1.66891 | 0.50711 | 2.37694 |
| 0.60863 | 1.29491 | 0.50721 | 1.30301 | 0.5072  | 1.66909 | 0.5072  | 2.37794 |
| 0.60875 | 1.29564 | 0.5073  | 1.30347 | 0.50729 | 1.66964 | 0.5073  | 2.37858 |
| 0.60886 | 1.29601 | 0.50739 | 1.30392 | 0.50739 | 1.66991 | 0.50739 | 2.37912 |
| 0.60897 | 1.2961  | 0.50749 | 1.3042  | 0.50748 | 1.67018 | 0.50748 | 2.37985 |
| 0.60908 | 1.29655 | 0.50758 | 1.30429 | 0.50757 | 1.671   | 0.50757 | 2.38057 |
| 0.60919 | 1.2971  | 0.50767 | 1.30474 | 0.50766 | 1.67182 | 0.50766 | 2.38167 |
| 0.6093  | 1.29728 | 0.50776 | 1.30501 | 0.50775 | 1.67218 | 0.50775 | 2.38276 |
| 0.60941 | 1.29792 | 0.50786 | 1.30547 | 0.50785 | 1.67263 | 0.50785 | 2.38313 |
| 0.60953 | 1.2981  | 0.50795 | 1.30584 | 0.50794 | 1.67318 | 0.50795 | 2.38331 |
| 0.60964 | 1.29847 | 0.50804 | 1.30629 | 0.50803 | 1.67382 | 0.50803 | 2.38394 |
| 0.60975 | 1.29901 | 0.50814 | 1.30657 | 0.50813 | 1.67437 | 0.50813 | 2.38486 |
| 0.60986 | 1.29955 | 0.50823 | 1.30684 | 0.50822 | 1.675   | 0.50822 | 2.38585 |
| 0.60997 | 1.29983 | 0.50832 | 1.30711 | 0.50831 | 1.67519 | 0.50831 | 2.38677 |
| 0.61008 | 1.30037 | 0.50841 | 1.30765 | 0.5084  | 1.67592 | 0.50841 | 2.3874  |
| 0.61019 | 1.30074 | 0.5085  | 1.30793 | 0.5085  | 1.67619 | 0.5085  | 2.38768 |
| 0.6103  | 1.30129 | 0.5086  | 1.30811 | 0.50859 | 1.67665 | 0.50859 | 2.38822 |
| 0.61042 | 1.30174 | 0.50869 | 1.3083  | 0.50868 | 1.67728 | 0.50868 | 2.38941 |
| 0.61052 | 1.30193 | 0.50878 | 1.30848 | 0.50878 | 1.67792 | 0.50878 | 2.38986 |
| 0.61064 | 1.30229 | 0.50887 | 1.30902 | 0.50886 | 1.6781  | 0.50886 | 2.39122 |
| 0.61075 | 1.3031  | 0.50897 | 1.30966 | 0.50896 | 1.67846 | 0.50896 | 2.39095 |
| 0.61086 | 1.30338 | 0.50906 | 1.30993 | 0.50905 | 1.67892 | 0.50906 | 2.39159 |
| 0.61097 | 1.30402 | 0.50915 | 1.31002 | 0.50914 | 1.67955 | 0.50914 | 2.39259 |
| 0.61108 | 1.30438 | 0.50925 | 1.31038 | 0.50923 | 1.6801  | 0.50924 | 2.39341 |
| 0.6112  | 1.30457 | 0.50934 | 1.31075 | 0.50933 | 1.68028 | 0.50933 | 2.39395 |
| 0.6113  | 1.3052  | 0.50943 | 1.31093 | 0.50942 | 1.68092 | 0.50942 | 2.39459 |
| 0.61142 | 1.30556 | 0.50952 | 1.31121 | 0.50951 | 1.68129 | 0.50952 | 2.39568 |
| 0.61152 | 1.30602 | 0.50962 | 1.31157 | 0.50961 | 1.68174 | 0.50961 | 2.39587 |
| 0.61164 | 1.30665 | 0.50971 | 1.31184 | 0.5097  | 1.68192 | 0.50971 | 2.39668 |
| 0.61175 | 1.30729 | 0.5098  | 1.31211 | 0.50979 | 1.68265 | 0.50979 | 2.39759 |
| 0.61186 | 1.30821 | 0.5099  | 1.31211 | 0.50988 | 1.68347 | 0.50989 | 2.3986  |
| 0.61197 | 1.30866 | 0.50998 | 1.31266 | 0.50998 | 1.68392 | 0.50998 | 2.39924 |
| 0.61208 | 1.30884 | 0.51008 | 1.31284 | 0.51007 | 1.68438 | 0.51007 | 2.40015 |
| 0.61219 | 1.3093  | 0.51017 | 1.3133  | 0.51016 | 1.68465 | 0.51017 | 2.40069 |
| 0.61231 | 1.30948 | 0.51026 | 1.31385 | 0.51026 | 1.6851  | 0.51026 | 2.40124 |
| 0.61241 | 1.3102  | 0.51036 | 1.31402 | 0.51034 | 1.68565 | 0.51035 | 2.40196 |

|         |         |         |         |         |         |         |         |
|---------|---------|---------|---------|---------|---------|---------|---------|
| 0.61253 | 1.31057 | 0.51045 | 1.31421 | 0.51044 | 1.68629 | 0.51044 | 2.40287 |
| 0.61264 | 1.31075 | 0.51054 | 1.31466 | 0.51054 | 1.68665 | 0.51054 | 2.4036  |
| 0.61275 | 1.31139 | 0.51063 | 1.31521 | 0.51063 | 1.68739 | 0.51063 | 2.40424 |
| 0.61286 | 1.31175 | 0.51073 | 1.31549 | 0.51072 | 1.68784 | 0.51072 | 2.40478 |
| 0.61297 | 1.31221 | 0.51082 | 1.31576 | 0.51081 | 1.68802 | 0.51081 | 2.40569 |
| 0.61309 | 1.31266 | 0.51091 | 1.31612 | 0.5109  | 1.68875 | 0.5109  | 2.40642 |
| 0.61319 | 1.31257 | 0.51101 | 1.31639 | 0.511   | 1.68912 | 0.511   | 2.4067  |
| 0.61331 | 1.31293 | 0.51109 | 1.31667 | 0.51109 | 1.68984 | 0.51109 | 2.4077  |
| 0.61341 | 1.31376 | 0.51119 | 1.31712 | 0.51118 | 1.69029 | 0.51118 | 2.40889 |
| 0.61353 | 1.31403 | 0.51128 | 1.31776 | 0.51127 | 1.69129 | 0.51127 | 2.40943 |
| 0.61363 | 1.31476 | 0.51138 | 1.31813 | 0.51137 | 1.69139 | 0.51137 | 2.41006 |
| 0.61375 | 1.31521 | 0.51147 | 1.3184  | 0.51146 | 1.69175 | 0.51146 | 2.41097 |
| 0.61386 | 1.31549 | 0.51156 | 1.31904 | 0.51155 | 1.69239 | 0.51155 | 2.41189 |
| 0.61397 | 1.31622 | 0.51166 | 1.31931 | 0.51165 | 1.69266 | 0.51165 | 2.41207 |
| 0.61408 | 1.31685 | 0.51174 | 1.31958 | 0.51174 | 1.69339 | 0.51174 | 2.41271 |
| 0.61419 | 1.31721 | 0.51184 | 1.31994 | 0.51183 | 1.69385 | 0.51183 | 2.41325 |
| 0.6143  | 1.31795 | 0.51193 | 1.3203  | 0.51192 | 1.69439 | 0.51193 | 2.41416 |
| 0.61441 | 1.31849 | 0.51202 | 1.32077 | 0.51202 | 1.69494 | 0.51202 | 2.41525 |
| 0.61453 | 1.31849 | 0.51212 | 1.32131 | 0.5121  | 1.69557 | 0.51211 | 2.41607 |
| 0.61464 | 1.31904 | 0.51221 | 1.32168 | 0.5122  | 1.69603 | 0.5122  | 2.41699 |
| 0.61475 | 1.31958 | 0.5123  | 1.32213 | 0.5123  | 1.69639 | 0.5123  | 2.41771 |
| 0.61486 | 1.32012 | 0.51239 | 1.32267 | 0.51239 | 1.69675 | 0.51239 | 2.4188  |
| 0.61497 | 1.32059 | 0.51249 | 1.32294 | 0.51248 | 1.6973  | 0.51248 | 2.41935 |
| 0.61508 | 1.32113 | 0.51258 | 1.3235  | 0.51257 | 1.69776 | 0.51257 | 2.42017 |
| 0.6152  | 1.32158 | 0.51267 | 1.32368 | 0.51266 | 1.69813 | 0.51266 | 2.42117 |
| 0.6153  | 1.32204 | 0.51277 | 1.32413 | 0.51275 | 1.69849 | 0.51276 | 2.42218 |
| 0.61542 | 1.3224  | 0.51285 | 1.32458 | 0.51285 | 1.69904 | 0.51285 | 2.42335 |
| 0.61552 | 1.32295 | 0.51295 | 1.32513 | 0.51294 | 1.69967 | 0.51294 | 2.4239  |
| 0.61564 | 1.32341 | 0.51304 | 1.32522 | 0.51303 | 1.7003  | 0.51303 | 2.42436 |
| 0.61575 | 1.32395 | 0.51314 | 1.3255  | 0.51313 | 1.70086 | 0.51313 | 2.42517 |
| 0.61586 | 1.32413 | 0.51323 | 1.32605 | 0.51322 | 1.70149 | 0.51322 | 2.42581 |
| 0.61597 | 1.3244  | 0.51332 | 1.32668 | 0.51331 | 1.70185 | 0.51331 | 2.42673 |
| 0.61608 | 1.32468 | 0.51342 | 1.32723 | 0.5134  | 1.70249 | 0.51341 | 2.42773 |
| 0.6162  | 1.32504 | 0.5135  | 1.32731 | 0.5135  | 1.70294 | 0.5135  | 2.42827 |
| 0.6163  | 1.32577 | 0.5136  | 1.32777 | 0.51359 | 1.70349 | 0.51359 | 2.42918 |
| 0.61642 | 1.32632 | 0.51369 | 1.32814 | 0.51368 | 1.70395 | 0.51369 | 2.43    |
| 0.61652 | 1.32659 | 0.51378 | 1.3285  | 0.51377 | 1.70458 | 0.51377 | 2.43082 |
| 0.61664 | 1.32695 | 0.51388 | 1.32859 | 0.51386 | 1.70495 | 0.51387 | 2.43155 |
| 0.61675 | 1.3275  | 0.51397 | 1.32895 | 0.51396 | 1.70586 | 0.51396 | 2.43273 |
| 0.61686 | 1.32814 | 0.51406 | 1.3295  | 0.51406 | 1.70622 | 0.51406 | 2.43346 |
| 0.61697 | 1.32859 | 0.51415 | 1.32986 | 0.51414 | 1.70641 | 0.51414 | 2.43391 |
| 0.61708 | 1.32886 | 0.51425 | 1.33023 | 0.51424 | 1.70732 | 0.51424 | 2.43473 |
| 0.61719 | 1.32923 | 0.51433 | 1.33069 | 0.51433 | 1.70777 | 0.51433 | 2.43528 |
| 0.6173  | 1.32932 | 0.51443 | 1.33123 | 0.51442 | 1.70777 | 0.51442 | 2.43601 |
| 0.61741 | 1.33004 | 0.51453 | 1.33159 | 0.51451 | 1.70832 | 0.51452 | 2.43728 |
| 0.61753 | 1.33041 | 0.51461 | 1.33196 | 0.51461 | 1.70905 | 0.51461 | 2.43828 |
| 0.61764 | 1.33096 | 0.51471 | 1.33205 | 0.5147  | 1.7095  | 0.5147  | 2.43856 |
| 0.61775 | 1.33159 | 0.5148  | 1.3325  | 0.51479 | 1.71004 | 0.51479 | 2.43919 |
| 0.61786 | 1.33159 | 0.51489 | 1.33296 | 0.51489 | 1.71077 | 0.51489 | 2.43992 |
| 0.61797 | 1.33214 | 0.51499 | 1.33333 | 0.51498 | 1.71114 | 0.51498 | 2.44056 |
| 0.61808 | 1.33296 | 0.51508 | 1.33378 | 0.51507 | 1.7115  | 0.51507 | 2.44219 |
| 0.61819 | 1.33342 | 0.51517 | 1.33414 | 0.51516 | 1.71187 | 0.51517 | 2.44301 |
| 0.61831 | 1.33369 | 0.51526 | 1.33441 | 0.51526 | 1.71232 | 0.51526 | 2.44392 |
| 0.61841 | 1.33432 | 0.51536 | 1.33478 | 0.51535 | 1.71296 | 0.51535 | 2.44438 |

|         |         |         |         |         |         |         |         |
|---------|---------|---------|---------|---------|---------|---------|---------|
| 0.61853 | 1.33487 | 0.51545 | 1.33505 | 0.51544 | 1.71341 | 0.51544 | 2.4452  |
| 0.61863 | 1.33533 | 0.51554 | 1.33578 | 0.51553 | 1.71387 | 0.51553 | 2.44556 |
| 0.61875 | 1.33569 | 0.51564 | 1.33651 | 0.51562 | 1.71478 | 0.51563 | 2.44656 |
| 0.61886 | 1.33606 | 0.51573 | 1.3366  | 0.51572 | 1.71505 | 0.51572 | 2.44775 |
| 0.61897 | 1.33669 | 0.51582 | 1.33714 | 0.51582 | 1.71569 | 0.51582 | 2.44784 |
| 0.61908 | 1.33724 | 0.51591 | 1.3377  | 0.5159  | 1.71642 | 0.5159  | 2.44866 |
| 0.61919 | 1.3377  | 0.516   | 1.33797 | 0.516   | 1.71696 | 0.516   | 2.44938 |
| 0.6193  | 1.33806 | 0.5161  | 1.33824 | 0.51609 | 1.71723 | 0.51609 | 2.45084 |
| 0.61941 | 1.33842 | 0.51619 | 1.33861 | 0.51618 | 1.71788 | 0.51618 | 2.45202 |
| 0.61953 | 1.33879 | 0.51629 | 1.33888 | 0.51627 | 1.71851 | 0.51628 | 2.45212 |
| 0.61964 | 1.33933 | 0.51637 | 1.33915 | 0.51637 | 1.71879 | 0.51637 | 2.45239 |
| 0.61975 | 1.33969 | 0.51647 | 1.33951 | 0.51646 | 1.71915 | 0.51646 | 2.45367 |
| 0.61986 | 1.33988 | 0.51656 | 1.3396  | 0.51655 | 1.71969 | 0.51655 | 2.45466 |
| 0.61997 | 1.34043 | 0.51665 | 1.33996 | 0.51665 | 1.72033 | 0.51665 | 2.45512 |
| 0.62008 | 1.34125 | 0.51675 | 1.34034 | 0.51674 | 1.7207  | 0.51674 | 2.45631 |
| 0.62019 | 1.3417  | 0.51684 | 1.34088 | 0.51683 | 1.72124 | 0.51683 | 2.45649 |
| 0.6203  | 1.34224 | 0.51693 | 1.34115 | 0.51692 | 1.72169 | 0.51693 | 2.45685 |
| 0.62042 | 1.34297 | 0.51702 | 1.34151 | 0.51701 | 1.72224 | 0.51701 | 2.45758 |
| 0.62052 | 1.3437  | 0.51712 | 1.34206 | 0.51711 | 1.72306 | 0.51711 | 2.45858 |
| 0.62064 | 1.34424 | 0.51721 | 1.34242 | 0.5172  | 1.7237  | 0.5172  | 2.45922 |
| 0.62075 | 1.34461 | 0.5173  | 1.34251 | 0.5173  | 1.72388 | 0.5173  | 2.46022 |
| 0.62086 | 1.34525 | 0.5174  | 1.34288 | 0.51738 | 1.72451 | 0.51739 | 2.4604  |
| 0.62097 | 1.3458  | 0.51748 | 1.34306 | 0.51748 | 1.72479 | 0.51748 | 2.46095 |
| 0.62108 | 1.34634 | 0.51758 | 1.34343 | 0.51757 | 1.72479 | 0.51757 | 2.46158 |
| 0.6212  | 1.34661 | 0.51767 | 1.34388 | 0.51766 | 1.72552 | 0.51766 | 2.46222 |
| 0.6213  | 1.34697 | 0.51776 | 1.34397 | 0.51776 | 1.72634 | 0.51776 | 2.46368 |
| 0.62142 | 1.34743 | 0.51785 | 1.34415 | 0.51785 | 1.72698 | 0.51785 | 2.46504 |
| 0.62152 | 1.3478  | 0.51795 | 1.34461 | 0.51794 | 1.72715 | 0.51794 | 2.4655  |
| 0.62164 | 1.34825 | 0.51805 | 1.34488 | 0.51803 | 1.72743 | 0.51804 | 2.46559 |
| 0.62175 | 1.34879 | 0.51813 | 1.34506 | 0.51813 | 1.72834 | 0.51813 | 2.46677 |
| 0.62186 | 1.34889 | 0.51823 | 1.3457  | 0.51822 | 1.72925 | 0.51822 | 2.46768 |
| 0.62197 | 1.34925 | 0.51832 | 1.34606 | 0.51831 | 1.7297  | 0.51831 | 2.46823 |
| 0.62208 | 1.35007 | 0.51841 | 1.3468  | 0.51841 | 1.73007 | 0.51841 | 2.46923 |
| 0.62219 | 1.35034 | 0.51851 | 1.34716 | 0.5185  | 1.73034 | 0.5185  | 2.4705  |
| 0.6223  | 1.35108 | 0.5186  | 1.3478  | 0.51859 | 1.73089 | 0.51859 | 2.47095 |
| 0.62241 | 1.35144 | 0.51869 | 1.34825 | 0.51868 | 1.73135 | 0.51868 | 2.4716  |
| 0.62253 | 1.3518  | 0.51878 | 1.34879 | 0.51877 | 1.73171 | 0.51877 | 2.47268 |
| 0.62264 | 1.35225 | 0.51888 | 1.34907 | 0.51887 | 1.73171 | 0.51887 | 2.47296 |
| 0.62275 | 1.35262 | 0.51897 | 1.34916 | 0.51896 | 1.73253 | 0.51896 | 2.47432 |
| 0.62286 | 1.3529  | 0.51906 | 1.3497  | 0.51905 | 1.73317 | 0.51905 | 2.47523 |
| 0.62297 | 1.35362 | 0.51916 | 1.34989 | 0.51914 | 1.7338  | 0.51915 | 2.47551 |
| 0.62309 | 1.35407 | 0.51924 | 1.35007 | 0.51924 | 1.73407 | 0.51924 | 2.47623 |
| 0.62319 | 1.35444 | 0.51934 | 1.35089 | 0.51933 | 1.73471 | 0.51933 | 2.47751 |
| 0.62331 | 1.35499 | 0.51943 | 1.35125 | 0.51942 | 1.73535 | 0.51942 | 2.47797 |
| 0.62341 | 1.35572 | 0.51952 | 1.35144 | 0.51952 | 1.73581 | 0.51952 | 2.47915 |
| 0.62353 | 1.35626 | 0.51961 | 1.35189 | 0.51961 | 1.73653 | 0.51961 | 2.47997 |
| 0.62363 | 1.35654 | 0.51971 | 1.35225 | 0.5197  | 1.73699 | 0.5197  | 2.48097 |
| 0.62375 | 1.35699 | 0.5198  | 1.35262 | 0.51979 | 1.73762 | 0.5198  | 2.48188 |
| 0.62386 | 1.35754 | 0.51989 | 1.35298 | 0.51989 | 1.73845 | 0.51989 | 2.48261 |
| 0.62397 | 1.3579  | 0.51999 | 1.35307 | 0.51998 | 1.7388  | 0.51998 | 2.48361 |
| 0.62408 | 1.35836 | 0.52008 | 1.35344 | 0.52007 | 1.73917 | 0.52007 | 2.48479 |
| 0.62419 | 1.3589  | 0.52017 | 1.35398 | 0.52017 | 1.73944 | 0.52017 | 2.48524 |
| 0.6243  | 1.35963 | 0.52027 | 1.35435 | 0.52025 | 1.73999 | 0.52026 | 2.48561 |
| 0.62442 | 1.36018 | 0.52036 | 1.3548  | 0.52035 | 1.74063 | 0.52035 | 2.48634 |



|         |         |         |         |         |         |         |         |
|---------|---------|---------|---------|---------|---------|---------|---------|
| 0.62453 | 1.36036 | 0.52045 | 1.35517 | 0.52044 | 1.74117 | 0.52044 | 2.48744 |
| 0.62464 | 1.36063 | 0.52054 | 1.35572 | 0.52053 | 1.74163 | 0.52053 | 2.4887  |
| 0.62475 | 1.36136 | 0.52064 | 1.35662 | 0.52063 | 1.74272 | 0.52063 | 2.4898  |
| 0.62486 | 1.36199 | 0.52073 | 1.35708 | 0.52072 | 1.74281 | 0.52072 | 2.49035 |
| 0.62497 | 1.36291 | 0.52082 | 1.35754 | 0.52081 | 1.74345 | 0.52081 | 2.4908  |
| 0.62508 | 1.36327 | 0.52091 | 1.35808 | 0.5209  | 1.74381 | 0.52091 | 2.4918  |
| 0.6252  | 1.36391 | 0.521   | 1.35853 | 0.521   | 1.74327 | 0.521   | 2.4928  |
| 0.6253  | 1.36427 | 0.5211  | 1.35917 | 0.52109 | 1.74345 | 0.52109 | 2.49353 |
| 0.62542 | 1.36436 | 0.52119 | 1.35953 | 0.52118 | 1.74436 | 0.52118 | 2.49417 |
| 0.62552 | 1.36481 | 0.52128 | 1.36018 | 0.52128 | 1.74472 | 0.52128 | 2.49507 |
| 0.62564 | 1.36518 | 0.52137 | 1.36063 | 0.52136 | 1.74509 | 0.52136 | 2.49571 |
| 0.62575 | 1.36563 | 0.52147 | 1.3609  | 0.52146 | 1.74545 | 0.52146 | 2.49672 |
| 0.62586 | 1.366   | 0.52156 | 1.36144 | 0.52155 | 1.74609 | 0.52156 | 2.49726 |
| 0.62597 | 1.36664 | 0.52165 | 1.36199 | 0.52165 | 1.74718 | 0.52165 | 2.49818 |
| 0.62608 | 1.367   | 0.52175 | 1.36272 | 0.52173 | 1.748   | 0.52174 | 2.49918 |
| 0.6262  | 1.36737 | 0.52184 | 1.36327 | 0.52183 | 1.74864 | 0.52183 | 2.50045 |
| 0.6263  | 1.36773 | 0.52193 | 1.36391 | 0.52193 | 1.74955 | 0.52193 | 2.50127 |
| 0.62642 | 1.36828 | 0.52203 | 1.36408 | 0.52201 | 1.74964 | 0.52202 | 2.50208 |
| 0.62652 | 1.36864 | 0.52212 | 1.36472 | 0.52211 | 1.7501  | 0.52211 | 2.50273 |
| 0.62664 | 1.36927 | 0.52221 | 1.36518 | 0.5222  | 1.75064 | 0.5222  | 2.50308 |
| 0.62675 | 1.37001 | 0.5223  | 1.36563 | 0.52229 | 1.75137 | 0.52229 | 2.504   |
| 0.62686 | 1.37028 | 0.5224  | 1.36591 | 0.52239 | 1.75192 | 0.52239 | 2.505   |
| 0.62697 | 1.37046 | 0.52248 | 1.36636 | 0.52248 | 1.75237 | 0.52248 | 2.50555 |
| 0.62708 | 1.37101 | 0.52258 | 1.36718 | 0.52257 | 1.7531  | 0.52257 | 2.50627 |
| 0.62719 | 1.37128 | 0.52267 | 1.36746 | 0.52266 | 1.75337 | 0.52267 | 2.50691 |
| 0.62731 | 1.37182 | 0.52276 | 1.36764 | 0.52276 | 1.75391 | 0.52276 | 2.50773 |
| 0.62741 | 1.37247 | 0.52286 | 1.36809 | 0.52284 | 1.75456 | 0.52285 | 2.509   |
| 0.62753 | 1.37292 | 0.52295 | 1.36864 | 0.52294 | 1.75501 | 0.52294 | 2.50991 |
| 0.62764 | 1.37346 | 0.52304 | 1.36882 | 0.52304 | 1.75529 | 0.52304 | 2.51028 |
| 0.62775 | 1.37383 | 0.52313 | 1.369   | 0.52312 | 1.75547 | 0.52312 | 2.51137 |
| 0.62786 | 1.37428 | 0.52323 | 1.36955 | 0.52322 | 1.75619 | 0.52322 | 2.51283 |
| 0.62797 | 1.37446 | 0.52332 | 1.37001 | 0.52331 | 1.75719 | 0.52332 | 2.51338 |
| 0.62809 | 1.37492 | 0.52341 | 1.37055 | 0.52341 | 1.75792 | 0.52341 | 2.51419 |
| 0.62819 | 1.37556 | 0.52351 | 1.37092 | 0.52349 | 1.75792 | 0.5235  | 2.51501 |
| 0.62831 | 1.37628 | 0.5236  | 1.37101 | 0.52359 | 1.75838 | 0.52359 | 2.51583 |
| 0.62841 | 1.37674 | 0.52369 | 1.37137 | 0.52369 | 1.75874 | 0.52368 | 2.51701 |
| 0.62853 | 1.3771  | 0.52379 | 1.37164 | 0.52377 | 1.75947 | 0.52377 | 2.51793 |
| 0.62863 | 1.37756 | 0.52387 | 1.37191 | 0.52387 | 1.76038 | 0.52387 | 2.51865 |
| 0.62875 | 1.37819 | 0.52397 | 1.37246 | 0.52396 | 1.76102 | 0.52396 | 2.51938 |
| 0.62886 | 1.37847 | 0.52406 | 1.37264 | 0.52405 | 1.76147 | 0.52405 | 2.5202  |
| 0.62897 | 1.37901 | 0.52415 | 1.37274 | 0.52415 | 1.76129 | 0.52415 | 2.52111 |
| 0.62908 | 1.37975 | 0.52424 | 1.37328 | 0.52424 | 1.76193 | 0.52424 | 2.52174 |
| 0.62919 | 1.37975 | 0.52434 | 1.37391 | 0.52433 | 1.76247 | 0.52433 | 2.52239 |
| 0.6293  | 1.38001 | 0.52443 | 1.37401 | 0.52442 | 1.76293 | 0.52442 | 2.52347 |
| 0.62941 | 1.38066 | 0.52452 | 1.37428 | 0.52452 | 1.76365 | 0.52452 | 2.52448 |
| 0.62953 | 1.38093 | 0.52462 | 1.37464 | 0.5246  | 1.76448 | 0.52461 | 2.5253  |
| 0.62964 | 1.38157 | 0.52471 | 1.37492 | 0.5247  | 1.76438 | 0.5247  | 2.52566 |
| 0.62975 | 1.38202 | 0.5248  | 1.3751  | 0.52479 | 1.76448 | 0.52479 | 2.52684 |
| 0.62986 | 1.38266 | 0.52489 | 1.37519 | 0.52488 | 1.76502 | 0.52488 | 2.52775 |
| 0.62997 | 1.38311 | 0.52499 | 1.37565 | 0.52498 | 1.76548 | 0.52498 | 2.52839 |
| 0.63008 | 1.38375 | 0.52508 | 1.37592 | 0.52507 | 1.76639 | 0.52508 | 2.52885 |
| 0.6302  | 1.38384 | 0.52517 | 1.37619 | 0.52516 | 1.76693 | 0.52516 | 2.52994 |
| 0.6303  | 1.3842  | 0.52527 | 1.37674 | 0.52525 | 1.76739 | 0.52526 | 2.53039 |
| 0.63042 | 1.38493 | 0.52535 | 1.3772  | 0.52535 | 1.76784 | 0.52535 | 2.53112 |

|         |         |         |         |         |         |         |         |
|---------|---------|---------|---------|---------|---------|---------|---------|
| 0.63052 | 1.38566 | 0.52545 | 1.37729 | 0.52544 | 1.76857 | 0.52544 | 2.53203 |
| 0.63064 | 1.38575 | 0.52555 | 1.37783 | 0.52553 | 1.76903 | 0.52553 | 2.53285 |
| 0.63075 | 1.38629 | 0.52564 | 1.3781  | 0.52563 | 1.76976 | 0.52563 | 2.53385 |
| 0.63086 | 1.38684 | 0.52573 | 1.37847 | 0.52572 | 1.7703  | 0.52572 | 2.53412 |
| 0.63097 | 1.3873  | 0.52582 | 1.37856 | 0.52581 | 1.77076 | 0.52581 | 2.53439 |
| 0.63108 | 1.38784 | 0.52591 | 1.37901 | 0.52591 | 1.77121 | 0.52591 | 2.5354  |
| 0.6312  | 1.38803 | 0.526   | 1.37929 | 0.526   | 1.77212 | 0.526   | 2.5364  |
| 0.6313  | 1.38857 | 0.5261  | 1.37956 | 0.52609 | 1.77276 | 0.52609 | 2.53713 |
| 0.63142 | 1.38884 | 0.52619 | 1.38001 | 0.52618 | 1.77312 | 0.52618 | 2.53785 |
| 0.63152 | 1.38976 | 0.52628 | 1.3802  | 0.52627 | 1.77376 | 0.52627 | 2.53886 |
| 0.63164 | 1.3903  | 0.52638 | 1.38047 | 0.52636 | 1.77439 | 0.52637 | 2.53977 |
| 0.63175 | 1.39076 | 0.52647 | 1.38102 | 0.52646 | 1.77494 | 0.52646 | 2.54031 |
| 0.63186 | 1.39076 | 0.52656 | 1.38138 | 0.52656 | 1.77576 | 0.52656 | 2.54113 |
| 0.63197 | 1.39157 | 0.52665 | 1.38156 | 0.52664 | 1.77649 | 0.52664 | 2.54159 |
| 0.63208 | 1.39222 | 0.52675 | 1.38211 | 0.52674 | 1.77703 | 0.52674 | 2.54286 |
| 0.63219 | 1.39249 | 0.52684 | 1.38238 | 0.52683 | 1.77731 | 0.52684 | 2.54377 |
| 0.6323  | 1.39285 | 0.52693 | 1.38266 | 0.52692 | 1.77777 | 0.52692 | 2.54459 |
| 0.63241 | 1.39322 | 0.52703 | 1.3832  | 0.52701 | 1.77831 | 0.52702 | 2.54504 |
| 0.63253 | 1.39348 | 0.52711 | 1.38365 | 0.52711 | 1.77894 | 0.52711 | 2.54577 |
| 0.63264 | 1.39394 | 0.52721 | 1.38384 | 0.5272  | 1.77931 | 0.5272  | 2.54632 |
| 0.63275 | 1.39449 | 0.5273  | 1.38447 | 0.52729 | 1.78031 | 0.52729 | 2.54723 |
| 0.63286 | 1.39495 | 0.52739 | 1.38475 | 0.52739 | 1.78031 | 0.52739 | 2.54859 |
| 0.63297 | 1.3954  | 0.52749 | 1.38484 | 0.52747 | 1.78076 | 0.52748 | 2.54905 |
| 0.63309 | 1.39567 | 0.52758 | 1.38511 | 0.52757 | 1.78131 | 0.52757 | 2.54978 |
| 0.63319 | 1.39612 | 0.52767 | 1.38566 | 0.52767 | 1.78186 | 0.52767 | 2.55106 |
| 0.63331 | 1.39676 | 0.52776 | 1.38621 | 0.52775 | 1.78268 | 0.52775 | 2.55196 |
| 0.63341 | 1.39704 | 0.52786 | 1.38675 | 0.52785 | 1.78332 | 0.52785 | 2.55269 |
| 0.63353 | 1.39767 | 0.52795 | 1.38702 | 0.52794 | 1.78377 | 0.52794 | 2.55369 |
| 0.63363 | 1.39841 | 0.52804 | 1.38712 | 0.52803 | 1.78395 | 0.52803 | 2.55479 |
| 0.63375 | 1.39885 | 0.52814 | 1.38757 | 0.52812 | 1.78441 | 0.52813 | 2.55515 |
| 0.63385 | 1.39922 | 0.52823 | 1.38793 | 0.52822 | 1.78459 | 0.52822 | 2.55597 |
| 0.63397 | 1.39977 | 0.52832 | 1.3883  | 0.52832 | 1.7855  | 0.52832 | 2.55661 |
| 0.63408 | 1.40022 | 0.52841 | 1.38857 | 0.5284  | 1.78632 | 0.5284  | 2.55679 |
| 0.63419 | 1.40032 | 0.52851 | 1.38894 | 0.5285  | 1.78668 | 0.5285  | 2.5577  |
| 0.6343  | 1.40095 | 0.5286  | 1.38958 | 0.52859 | 1.78723 | 0.52859 | 2.55815 |
| 0.63441 | 1.40149 | 0.52869 | 1.38994 | 0.52868 | 1.78787 | 0.52868 | 2.55925 |
| 0.63453 | 1.40186 | 0.52878 | 1.39012 | 0.52877 | 1.78841 | 0.52878 | 2.56097 |
| 0.63464 | 1.40232 | 0.52887 | 1.3903  | 0.52887 | 1.78869 | 0.52887 | 2.56143 |
| 0.63475 | 1.40286 | 0.52897 | 1.39076 | 0.52896 | 1.78942 | 0.52896 | 2.56234 |
| 0.63486 | 1.40341 | 0.52906 | 1.3913  | 0.52905 | 1.78969 | 0.52905 | 2.56325 |
| 0.63497 | 1.40423 | 0.52915 | 1.3913  | 0.52915 | 1.79032 | 0.52915 | 2.56388 |
| 0.63508 | 1.40432 | 0.52925 | 1.39212 | 0.52924 | 1.79123 | 0.52924 | 2.56498 |
| 0.6352  | 1.40478 | 0.52934 | 1.39294 | 0.52933 | 1.79178 | 0.52933 | 2.56626 |
| 0.6353  | 1.40559 | 0.52943 | 1.39312 | 0.52943 | 1.79251 | 0.52943 | 2.56662 |
| 0.63542 | 1.40578 | 0.52952 | 1.39321 | 0.52951 | 1.79314 | 0.52951 | 2.56789 |
| 0.63552 | 1.40623 | 0.52962 | 1.39358 | 0.52961 | 1.7936  | 0.52961 | 2.56907 |
| 0.63564 | 1.40668 | 0.52971 | 1.39403 | 0.5297  | 1.79387 | 0.5297  | 2.56935 |
| 0.63575 | 1.40723 | 0.5298  | 1.39494 | 0.52979 | 1.79451 | 0.52979 | 2.56998 |
| 0.63586 | 1.40769 | 0.5299  | 1.39549 | 0.52988 | 1.79497 | 0.52989 | 2.57053 |
| 0.63597 | 1.40832 | 0.52999 | 1.39576 | 0.52998 | 1.79542 | 0.52998 | 2.57098 |
| 0.63608 | 1.40859 | 0.53008 | 1.39612 | 0.53007 | 1.79615 | 0.53007 | 2.57245 |
| 0.6362  | 1.40905 | 0.53017 | 1.39658 | 0.53016 | 1.79706 | 0.53016 | 2.57399 |
| 0.6363  | 1.40996 | 0.53027 | 1.39713 | 0.53026 | 1.79787 | 0.53026 | 2.57436 |
| 0.63642 | 1.41033 | 0.53036 | 1.39731 | 0.53035 | 1.79787 | 0.53035 | 2.57481 |

|         |         |         |         |         |         |         |         |
|---------|---------|---------|---------|---------|---------|---------|---------|
| 0.63652 | 1.41087 | 0.53045 | 1.39758 | 0.53044 | 1.79779 | 0.53044 | 2.57563 |
| 0.63664 | 1.41124 | 0.53054 | 1.39804 | 0.53053 | 1.79815 | 0.53054 | 2.57627 |
| 0.63675 | 1.41187 | 0.53063 | 1.3984  | 0.53063 | 1.79879 | 0.53063 | 2.577   |
| 0.63686 | 1.41251 | 0.53073 | 1.39849 | 0.53072 | 1.7996  | 0.53072 | 2.57808 |
| 0.63697 | 1.41287 | 0.53083 | 1.39885 | 0.53081 | 1.80024 | 0.53081 | 2.57872 |
| 0.63708 | 1.4136  | 0.53091 | 1.39931 | 0.53091 | 1.80097 | 0.53091 | 2.57927 |
| 0.63719 | 1.41406 | 0.53101 | 1.39986 | 0.531   | 1.80143 | 0.531   | 2.58054 |
| 0.63731 | 1.41433 | 0.5311  | 1.40032 | 0.53109 | 1.80143 | 0.53109 | 2.58064 |
| 0.63741 | 1.41506 | 0.53119 | 1.40095 | 0.53118 | 1.80189 | 0.53118 | 2.58173 |
| 0.63753 | 1.4156  | 0.53128 | 1.40131 | 0.53127 | 1.80225 | 0.53127 | 2.58255 |
| 0.63764 | 1.4156  | 0.53138 | 1.40149 | 0.53137 | 1.80271 | 0.53137 | 2.58364 |
| 0.63775 | 1.41651 | 0.53146 | 1.40204 | 0.53146 | 1.80343 | 0.53146 | 2.58473 |
| 0.63786 | 1.41715 | 0.53156 | 1.40232 | 0.53155 | 1.80425 | 0.53155 | 2.58582 |
| 0.63797 | 1.4176  | 0.53166 | 1.40241 | 0.53164 | 1.80452 | 0.53165 | 2.58646 |
| 0.63808 | 1.41797 | 0.53175 | 1.40305 | 0.53174 | 1.80507 | 0.53174 | 2.58737 |
| 0.63819 | 1.41833 | 0.53184 | 1.4035  | 0.53183 | 1.8058  | 0.53183 | 2.58864 |
| 0.63831 | 1.41925 | 0.53193 | 1.40386 | 0.53192 | 1.80598 | 0.53192 | 2.58901 |
| 0.63841 | 1.42016 | 0.53203 | 1.40459 | 0.53202 | 1.80661 | 0.53202 | 2.58973 |
| 0.63853 | 1.4207  | 0.53212 | 1.40504 | 0.53211 | 1.80734 | 0.53211 | 2.59055 |
| 0.63863 | 1.42115 | 0.53221 | 1.40514 | 0.5322  | 1.8078  | 0.5322  | 2.59155 |
| 0.63875 | 1.42143 | 0.5323  | 1.4055  | 0.53229 | 1.80862 | 0.5323  | 2.59274 |
| 0.63886 | 1.42189 | 0.53239 | 1.40578 | 0.53238 | 1.80935 | 0.53238 | 2.59429 |
| 0.63897 | 1.42253 | 0.53249 | 1.40623 | 0.53248 | 1.80944 | 0.53248 | 2.59447 |
| 0.63908 | 1.42307 | 0.53258 | 1.40705 | 0.53257 | 1.81025 | 0.53257 | 2.59484 |
| 0.63919 | 1.42352 | 0.53267 | 1.4076  | 0.53267 | 1.81098 | 0.53267 | 2.59575 |
| 0.6393  | 1.42407 | 0.53277 | 1.40777 | 0.53275 | 1.81172 | 0.53276 | 2.59657 |
| 0.63942 | 1.42489 | 0.53286 | 1.40814 | 0.53285 | 1.81235 | 0.53285 | 2.59766 |
| 0.63953 | 1.42552 | 0.53295 | 1.40877 | 0.53294 | 1.81262 | 0.53294 | 2.59893 |
| 0.63964 | 1.42625 | 0.53304 | 1.40896 | 0.53303 | 1.81353 | 0.53303 | 2.60021 |
| 0.63975 | 1.42607 | 0.53314 | 1.40933 | 0.53313 | 1.81408 | 0.53313 | 2.60048 |
| 0.63986 | 1.42652 | 0.53322 | 1.40951 | 0.53322 | 1.8149  | 0.53322 | 2.60129 |
| 0.63997 | 1.42717 | 0.53332 | 1.40978 | 0.53331 | 1.8149  | 0.53331 | 2.60184 |
| 0.64008 | 1.42753 | 0.53342 | 1.41014 | 0.5334  | 1.81436 | 0.53341 | 2.60312 |
| 0.6402  | 1.42816 | 0.53351 | 1.41069 | 0.5335  | 1.81527 | 0.5335  | 2.60394 |
| 0.6403  | 1.4288  | 0.5336  | 1.41114 | 0.53359 | 1.81617 | 0.53359 | 2.60439 |
| 0.64042 | 1.42917 | 0.53369 | 1.4115  | 0.53368 | 1.81672 | 0.53368 | 2.60503 |
| 0.64052 | 1.42944 | 0.53378 | 1.41187 | 0.53378 | 1.81772 | 0.53378 | 2.60584 |
| 0.64064 | 1.43026 | 0.53387 | 1.41215 | 0.53387 | 1.81872 | 0.53387 | 2.60658 |
| 0.64075 | 1.43072 | 0.53397 | 1.41224 | 0.53396 | 1.81936 | 0.53396 | 2.60703 |
| 0.64086 | 1.43126 | 0.53406 | 1.4126  | 0.53405 | 1.81954 | 0.53406 | 2.60803 |
| 0.64097 | 1.43172 | 0.53415 | 1.41296 | 0.53414 | 1.81918 | 0.53414 | 2.60894 |
| 0.64108 | 1.43199 | 0.53425 | 1.41387 | 0.53424 | 1.81972 | 0.53424 | 2.61003 |
| 0.6412  | 1.43244 | 0.53434 | 1.41433 | 0.53433 | 1.82045 | 0.53433 | 2.61158 |
| 0.6413  | 1.43317 | 0.53443 | 1.41451 | 0.53442 | 1.82081 | 0.53442 | 2.61258 |
| 0.64142 | 1.43371 | 0.53452 | 1.4147  | 0.53451 | 1.8219  | 0.53452 | 2.61258 |
| 0.64153 | 1.43408 | 0.53462 | 1.41524 | 0.53461 | 1.82254 | 0.53461 | 2.61385 |
| 0.64164 | 1.43481 | 0.53471 | 1.41533 | 0.5347  | 1.82291 | 0.5347  | 2.61468 |
| 0.64175 | 1.43517 | 0.5348  | 1.41588 | 0.53479 | 1.82364 | 0.53479 | 2.61541 |
| 0.64186 | 1.43553 | 0.5349  | 1.41624 | 0.53489 | 1.82409 | 0.53489 | 2.61649 |
| 0.64197 | 1.43617 | 0.53498 | 1.41651 | 0.53498 | 1.82455 | 0.53498 | 2.61732 |
| 0.64208 | 1.43663 | 0.53508 | 1.41706 | 0.53507 | 1.825   | 0.53507 | 2.61804 |
| 0.64219 | 1.437   | 0.53518 | 1.41751 | 0.53516 | 1.82555 | 0.53517 | 2.61932 |
| 0.64231 | 1.43772 | 0.53526 | 1.41788 | 0.53526 | 1.82619 | 0.53526 | 2.61996 |
| 0.64241 | 1.43809 | 0.53536 | 1.41815 | 0.53535 | 1.82692 | 0.53535 | 2.62095 |

|         |         |         |         |         |         |         |         |
|---------|---------|---------|---------|---------|---------|---------|---------|
| 0.64253 | 1.43827 | 0.53545 | 1.41825 | 0.53544 | 1.82764 | 0.53544 | 2.62232 |
| 0.64264 | 1.439   | 0.53554 | 1.4187  | 0.53554 | 1.82792 | 0.53554 | 2.62296 |
| 0.64275 | 1.43927 | 0.53563 | 1.41906 | 0.53562 | 1.82883 | 0.53563 | 2.62405 |
| 0.64286 | 1.44009 | 0.53573 | 1.41952 | 0.53572 | 1.8291  | 0.53572 | 2.62505 |
| 0.64297 | 1.44072 | 0.53582 | 1.41997 | 0.53581 | 1.8291  | 0.53582 | 2.6256  |
| 0.64309 | 1.44072 | 0.53591 | 1.42061 | 0.53591 | 1.82973 | 0.53591 | 2.6265  |
| 0.64319 | 1.44118 | 0.53601 | 1.42115 | 0.536   | 1.83064 | 0.536   | 2.62742 |
| 0.64331 | 1.44172 | 0.53609 | 1.42124 | 0.53609 | 1.83137 | 0.53609 | 2.62778 |
| 0.64341 | 1.44227 | 0.53619 | 1.4217  | 0.53618 | 1.8321  | 0.53618 | 2.6286  |
| 0.64353 | 1.44273 | 0.53628 | 1.42179 | 0.53627 | 1.83255 | 0.53628 | 2.62997 |
| 0.64364 | 1.44336 | 0.53637 | 1.42225 | 0.53637 | 1.8331  | 0.53637 | 2.63078 |
| 0.64375 | 1.44355 | 0.53647 | 1.4228  | 0.53646 | 1.83365 | 0.53646 | 2.63206 |
| 0.64386 | 1.44428 | 0.53656 | 1.42306 | 0.53655 | 1.83401 | 0.53655 | 2.63297 |
| 0.64397 | 1.44464 | 0.53666 | 1.4237  | 0.53665 | 1.83419 | 0.53665 | 2.63342 |
| 0.64408 | 1.44519 | 0.53674 | 1.42407 | 0.53674 | 1.83465 | 0.53674 | 2.63406 |
| 0.64419 | 1.44564 | 0.53684 | 1.42471 | 0.53683 | 1.83519 | 0.53683 | 2.63497 |
| 0.6443  | 1.446   | 0.53694 | 1.4248  | 0.53692 | 1.83574 | 0.53693 | 2.63597 |
| 0.64442 | 1.44646 | 0.53702 | 1.42498 | 0.53702 | 1.83656 | 0.53702 | 2.63716 |
| 0.64453 | 1.44728 | 0.53712 | 1.42552 | 0.53711 | 1.83702 | 0.53711 | 2.63861 |
| 0.64464 | 1.44746 | 0.53721 | 1.42552 | 0.5372  | 1.83766 | 0.5372  | 2.63916 |
| 0.64475 | 1.44819 | 0.5373  | 1.42598 | 0.53729 | 1.83792 | 0.53729 | 2.63988 |
| 0.64486 | 1.44837 | 0.53739 | 1.4268  | 0.53738 | 1.83865 | 0.53738 | 2.64089 |
| 0.64497 | 1.4491  | 0.53749 | 1.42717 | 0.53748 | 1.83902 | 0.53748 | 2.64135 |
| 0.64508 | 1.44964 | 0.53758 | 1.42761 | 0.53757 | 1.83993 | 0.53757 | 2.64271 |
| 0.6452  | 1.45001 | 0.53767 | 1.42807 | 0.53766 | 1.84029 | 0.53766 | 2.64417 |
| 0.6453  | 1.45029 | 0.53777 | 1.42871 | 0.53776 | 1.84056 | 0.53776 | 2.64526 |
| 0.64542 | 1.45101 | 0.53785 | 1.42871 | 0.53785 | 1.84156 | 0.53785 | 2.64581 |
| 0.64552 | 1.45129 | 0.53795 | 1.42908 | 0.53794 | 1.84229 | 0.53794 | 2.64672 |
| 0.64564 | 1.45201 | 0.53804 | 1.42953 | 0.53803 | 1.84247 | 0.53803 | 2.64735 |
| 0.64575 | 1.45247 | 0.53813 | 1.43026 | 0.53813 | 1.84375 | 0.53813 | 2.64854 |
| 0.64586 | 1.45292 | 0.53823 | 1.43062 | 0.53822 | 1.84439 | 0.53822 | 2.64936 |
| 0.64597 | 1.45328 | 0.53832 | 1.43062 | 0.53831 | 1.84466 | 0.53831 | 2.65008 |
| 0.64608 | 1.45374 | 0.53842 | 1.43117 | 0.53841 | 1.84557 | 0.53841 | 2.65127 |
| 0.6462  | 1.45447 | 0.5385  | 1.43181 | 0.5385  | 1.84621 | 0.5385  | 2.6519  |
| 0.6463  | 1.45501 | 0.5386  | 1.43199 | 0.53859 | 1.84657 | 0.53859 | 2.65245 |
| 0.64642 | 1.45556 | 0.53869 | 1.43244 | 0.53868 | 1.84703 | 0.53868 | 2.65354 |
| 0.64653 | 1.4562  | 0.53878 | 1.4328  | 0.53878 | 1.84758 | 0.53878 | 2.65472 |
| 0.64664 | 1.45693 | 0.53888 | 1.43353 | 0.53887 | 1.84821 | 0.53887 | 2.65509 |
| 0.64675 | 1.45738 | 0.53897 | 1.4339  | 0.53896 | 1.84912 | 0.53896 | 2.65636 |
| 0.64686 | 1.45792 | 0.53906 | 1.43435 | 0.53905 | 1.84976 | 0.53905 | 2.65773 |
| 0.64697 | 1.45847 | 0.53915 | 1.43481 | 0.53914 | 1.8504  | 0.53914 | 2.65837 |
| 0.64708 | 1.45902 | 0.53925 | 1.43463 | 0.53924 | 1.85122 | 0.53924 | 2.65855 |
| 0.64719 | 1.45948 | 0.53934 | 1.43526 | 0.53933 | 1.85176 | 0.53934 | 2.65918 |
| 0.64731 | 1.45993 | 0.53943 | 1.4359  | 0.53942 | 1.85231 | 0.53942 | 2.66009 |
| 0.64741 | 1.46047 | 0.53953 | 1.43617 | 0.53952 | 1.85304 | 0.53952 | 2.66101 |
| 0.64753 | 1.46102 | 0.53961 | 1.43654 | 0.53961 | 1.85349 | 0.53961 | 2.66209 |
| 0.64764 | 1.46166 | 0.53971 | 1.43718 | 0.5397  | 1.85394 | 0.5397  | 2.663   |
| 0.64775 | 1.46175 | 0.5398  | 1.43754 | 0.53979 | 1.85458 | 0.53979 | 2.66383 |
| 0.64786 | 1.46203 | 0.53989 | 1.43781 | 0.53989 | 1.85513 | 0.53989 | 2.66519 |
| 0.64797 | 1.46266 | 0.53999 | 1.43799 | 0.53997 | 1.85549 | 0.53998 | 2.66601 |
| 0.64809 | 1.46311 | 0.54008 | 1.43836 | 0.54007 | 1.85659 | 0.54007 | 2.66683 |
| 0.64819 | 1.46339 | 0.54017 | 1.43881 | 0.54017 | 1.85713 | 0.54017 | 2.6682  |
| 0.64831 | 1.46439 | 0.54026 | 1.43927 | 0.54026 | 1.85649 | 0.54026 | 2.66902 |
| 0.64841 | 1.46467 | 0.54036 | 1.43973 | 0.54035 | 1.85749 | 0.54035 | 2.66974 |

|         |         |         |         |         |         |         |         |
|---------|---------|---------|---------|---------|---------|---------|---------|
| 0.64853 | 1.46512 | 0.54045 | 1.44009 | 0.54044 | 1.85868 | 0.54045 | 2.67074 |
| 0.64863 | 1.46557 | 0.54054 | 1.44063 | 0.54054 | 1.85932 | 0.54054 | 2.67165 |
| 0.64875 | 1.46621 | 0.54064 | 1.44109 | 0.54062 | 1.86041 | 0.54063 | 2.67247 |
| 0.64886 | 1.46658 | 0.54073 | 1.44146 | 0.54072 | 1.86087 | 0.54072 | 2.67338 |
| 0.64897 | 1.4673  | 0.54082 | 1.44182 | 0.54081 | 1.86095 | 0.54081 | 2.67366 |
| 0.64908 | 1.46803 | 0.54091 | 1.44246 | 0.5409  | 1.86159 | 0.5409  | 2.67448 |
| 0.64919 | 1.46858 | 0.54101 | 1.44309 | 0.541   | 1.86241 | 0.541   | 2.67566 |
| 0.6493  | 1.46912 | 0.5411  | 1.44373 | 0.54109 | 1.86223 | 0.54109 | 2.67639 |
| 0.64941 | 1.4694  | 0.54119 | 1.44391 | 0.54118 | 1.86295 | 0.54118 | 2.67711 |
| 0.64953 | 1.47003 | 0.54128 | 1.44419 | 0.54128 | 1.86386 | 0.54128 | 2.67848 |
| 0.64964 | 1.47085 | 0.54137 | 1.44437 | 0.54137 | 1.86423 | 0.54137 | 2.67994 |
| 0.64975 | 1.47131 | 0.54147 | 1.4451  | 0.54146 | 1.86451 | 0.54146 | 2.68048 |
| 0.64986 | 1.47177 | 0.54156 | 1.44519 | 0.54155 | 1.86523 | 0.54155 | 2.68148 |
| 0.64997 | 1.47194 | 0.54165 | 1.44555 | 0.54165 | 1.86596 | 0.54165 | 2.68248 |
| 0.65008 | 1.47303 | 0.54175 | 1.446   | 0.54173 | 1.8665  | 0.54174 | 2.68312 |
| 0.65019 | 1.47349 | 0.54184 | 1.44609 | 0.54183 | 1.86705 | 0.54183 | 2.68367 |
| 0.6503  | 1.47386 | 0.54193 | 1.44646 | 0.54193 | 1.86741 | 0.54193 | 2.68439 |
| 0.65042 | 1.47422 | 0.54202 | 1.4471  | 0.54202 | 1.86824 | 0.54202 | 2.68512 |
| 0.65052 | 1.47513 | 0.54212 | 1.44755 | 0.54211 | 1.86869 | 0.54211 | 2.68603 |
| 0.65064 | 1.47522 | 0.54221 | 1.44792 | 0.5422  | 1.86897 | 0.5422  | 2.68667 |
| 0.65075 | 1.47595 | 0.5423  | 1.44855 | 0.5423  | 1.86969 | 0.5423  | 2.68786 |
| 0.65086 | 1.47641 | 0.5424  | 1.44873 | 0.54238 | 1.87042 | 0.54239 | 2.68877 |
| 0.65097 | 1.47695 | 0.54248 | 1.44892 | 0.54248 | 1.87097 | 0.54248 | 2.68985 |
| 0.65108 | 1.47759 | 0.54258 | 1.44946 | 0.54257 | 1.87115 | 0.54257 | 2.69031 |
| 0.6512  | 1.47795 | 0.54267 | 1.44964 | 0.54266 | 1.87206 | 0.54266 | 2.69104 |
| 0.6513  | 1.47877 | 0.54276 | 1.44992 | 0.54276 | 1.87252 | 0.54276 | 2.69213 |
| 0.65142 | 1.47941 | 0.54286 | 1.45037 | 0.54285 | 1.87297 | 0.54285 | 2.69295 |
| 0.65152 | 1.47986 | 0.54295 | 1.45073 | 0.54294 | 1.8737  | 0.54294 | 2.6945  |
| 0.65164 | 1.48041 | 0.54304 | 1.45101 | 0.54304 | 1.87397 | 0.54304 | 2.6955  |
| 0.65175 | 1.48105 | 0.54313 | 1.45138 | 0.54313 | 1.8746  | 0.54313 | 2.69623 |
| 0.65186 | 1.48114 | 0.54323 | 1.45165 | 0.54322 | 1.87534 | 0.54322 | 2.69723 |
| 0.65197 | 1.48187 | 0.54332 | 1.4521  | 0.54331 | 1.87579 | 0.54331 | 2.69814 |
| 0.65208 | 1.48269 | 0.54341 | 1.45247 | 0.54341 | 1.87643 | 0.5434  | 2.69841 |
| 0.65219 | 1.48295 | 0.54351 | 1.45274 | 0.54349 | 1.87715 | 0.5435  | 2.69923 |
| 0.6523  | 1.48342 | 0.5436  | 1.45319 | 0.54359 | 1.87752 | 0.54359 | 2.70005 |
| 0.65241 | 1.48432 | 0.54369 | 1.45356 | 0.54368 | 1.87815 | 0.54369 | 2.70087 |
| 0.65253 | 1.48441 | 0.54378 | 1.45383 | 0.54378 | 1.87906 | 0.54377 | 2.70196 |
| 0.65264 | 1.48514 | 0.54388 | 1.45447 | 0.54387 | 1.87979 | 0.54387 | 2.70305 |
| 0.65275 | 1.48615 | 0.54397 | 1.45447 | 0.54396 | 1.88052 | 0.54396 | 2.70351 |
| 0.65286 | 1.4866  | 0.54406 | 1.45501 | 0.54405 | 1.88107 | 0.54405 | 2.70451 |
| 0.65297 | 1.48697 | 0.54416 | 1.45556 | 0.54414 | 1.88153 | 0.54415 | 2.70551 |
| 0.65309 | 1.48769 | 0.54425 | 1.4561  | 0.54424 | 1.88216 | 0.54424 | 2.70597 |
| 0.65319 | 1.48814 | 0.54434 | 1.45675 | 0.54433 | 1.8828  | 0.54433 | 2.70752 |
| 0.65331 | 1.4886  | 0.54443 | 1.45684 | 0.54442 | 1.88326 | 0.54442 | 2.70861 |
| 0.65341 | 1.48942 | 0.54452 | 1.45684 | 0.54452 | 1.88371 | 0.54452 | 2.70997 |
| 0.65353 | 1.48942 | 0.54462 | 1.4572  | 0.54461 | 1.88453 | 0.54461 | 2.7107  |
| 0.65363 | 1.48996 | 0.54471 | 1.45766 | 0.5447  | 1.88525 | 0.5447  | 2.71124 |
| 0.65375 | 1.49097 | 0.5448  | 1.4582  | 0.5448  | 1.88553 | 0.5448  | 2.71188 |
| 0.65386 | 1.49134 | 0.54489 | 1.45856 | 0.54488 | 1.88616 | 0.54488 | 2.71298 |
| 0.65397 | 1.4917  | 0.54499 | 1.45884 | 0.54498 | 1.88671 | 0.54498 | 2.71389 |
| 0.65408 | 1.49224 | 0.54508 | 1.45957 | 0.54507 | 1.88744 | 0.54507 | 2.7147  |
| 0.65419 | 1.49288 | 0.54517 | 1.46002 | 0.54517 | 1.88798 | 0.54517 | 2.71598 |
| 0.6543  | 1.49334 | 0.54527 | 1.4602  | 0.54525 | 1.88835 | 0.54526 | 2.71625 |
| 0.65441 | 1.49406 | 0.54536 | 1.46066 | 0.54535 | 1.88872 | 0.54535 | 2.71734 |

|         |         |         |         |         |         |         |         |
|---------|---------|---------|---------|---------|---------|---------|---------|
| 0.65453 | 1.49415 | 0.54545 | 1.46093 | 0.54545 | 1.88971 | 0.54545 | 2.71817 |
| 0.65464 | 1.4947  | 0.54554 | 1.46166 | 0.54553 | 1.89044 | 0.54553 | 2.71953 |
| 0.65475 | 1.49551 | 0.54564 | 1.46211 | 0.54563 | 1.89081 | 0.54563 | 2.72053 |
| 0.65486 | 1.49598 | 0.54572 | 1.4623  | 0.54572 | 1.89144 | 0.54572 | 2.72189 |
| 0.65497 | 1.49643 | 0.54582 | 1.46293 | 0.54581 | 1.89199 | 0.54581 | 2.72244 |
| 0.65508 | 1.49697 | 0.54592 | 1.46348 | 0.5459  | 1.89272 | 0.54591 | 2.72326 |
| 0.6552  | 1.49734 | 0.54601 | 1.46375 | 0.546   | 1.89335 | 0.546   | 2.72453 |
| 0.6553  | 1.4977  | 0.5461  | 1.46439 | 0.54609 | 1.89391 | 0.54609 | 2.72563 |
| 0.65542 | 1.49825 | 0.54619 | 1.46476 | 0.54618 | 1.89418 | 0.54618 | 2.72626 |
| 0.65552 | 1.49907 | 0.54628 | 1.46493 | 0.54628 | 1.89454 | 0.54628 | 2.72754 |
| 0.65564 | 1.49953 | 0.54637 | 1.46521 | 0.54636 | 1.89509 | 0.54636 | 2.72881 |
| 0.65575 | 1.4998  | 0.54647 | 1.46575 | 0.54646 | 1.89563 | 0.54646 | 2.72926 |
| 0.65586 | 1.50052 | 0.54656 | 1.4663  | 0.54655 | 1.89627 | 0.54656 | 2.73018 |
| 0.65597 | 1.50116 | 0.54665 | 1.46675 | 0.54664 | 1.897   | 0.54664 | 2.73045 |
| 0.65608 | 1.50189 | 0.54675 | 1.46721 | 0.54673 | 1.89746 | 0.54674 | 2.73145 |
| 0.6562  | 1.50189 | 0.54684 | 1.46776 | 0.54683 | 1.89827 | 0.54683 | 2.73254 |
| 0.6563  | 1.50271 | 0.54693 | 1.46848 | 0.54693 | 1.89891 | 0.54693 | 2.73327 |
| 0.65642 | 1.50326 | 0.54703 | 1.46885 | 0.54701 | 1.89937 | 0.54702 | 2.73464 |
| 0.65652 | 1.50353 | 0.54712 | 1.46894 | 0.54711 | 1.90018 | 0.54711 | 2.73528 |
| 0.65664 | 1.50408 | 0.54721 | 1.46921 | 0.5472  | 1.90082 | 0.54721 | 2.73609 |
| 0.65675 | 1.50453 | 0.5473  | 1.46967 | 0.54729 | 1.90128 | 0.54729 | 2.73673 |
| 0.65686 | 1.50535 | 0.54739 | 1.4703  | 0.54739 | 1.90227 | 0.54739 | 2.73737 |
| 0.65697 | 1.5059  | 0.54748 | 1.47067 | 0.54748 | 1.90246 | 0.54748 | 2.73837 |
| 0.65708 | 1.50644 | 0.54758 | 1.47104 | 0.54757 | 1.90328 | 0.54757 | 2.73937 |
| 0.65719 | 1.50671 | 0.54767 | 1.47131 | 0.54766 | 1.90392 | 0.54767 | 2.74047 |
| 0.65731 | 1.50753 | 0.54776 | 1.47167 | 0.54776 | 1.90473 | 0.54776 | 2.74137 |
| 0.65741 | 1.5078  | 0.54786 | 1.47213 | 0.54785 | 1.90537 | 0.54785 | 2.74265 |
| 0.65753 | 1.50826 | 0.54795 | 1.47231 | 0.54794 | 1.90591 | 0.54794 | 2.74356 |
| 0.65764 | 1.50899 | 0.54804 | 1.47276 | 0.54804 | 1.90619 | 0.54804 | 2.74456 |
| 0.65775 | 1.50963 | 0.54813 | 1.47331 | 0.54812 | 1.90701 | 0.54812 | 2.74511 |
| 0.65786 | 1.51026 | 0.54823 | 1.47358 | 0.54822 | 1.90746 | 0.54822 | 2.7461  |
| 0.65797 | 1.51126 | 0.54832 | 1.47404 | 0.54831 | 1.90783 | 0.54831 | 2.74701 |
| 0.65809 | 1.51118 | 0.54841 | 1.47477 | 0.5484  | 1.90838 | 0.5484  | 2.74793 |
| 0.65819 | 1.51135 | 0.54851 | 1.47522 | 0.54849 | 1.90892 | 0.5485  | 2.74948 |
| 0.65831 | 1.51208 | 0.5486  | 1.47549 | 0.54859 | 1.90919 | 0.54859 | 2.75065 |
| 0.65841 | 1.51263 | 0.54869 | 1.47595 | 0.54869 | 1.91019 | 0.54868 | 2.75129 |
| 0.65853 | 1.513   | 0.54879 | 1.47631 | 0.54877 | 1.91074 | 0.54878 | 2.75193 |
| 0.65863 | 1.51363 | 0.54888 | 1.47677 | 0.54887 | 1.9112  | 0.54887 | 2.75311 |
| 0.65875 | 1.51418 | 0.54897 | 1.4774  | 0.54896 | 1.9122  | 0.54896 | 2.75402 |
| 0.65886 | 1.51499 | 0.54906 | 1.47767 | 0.54905 | 1.91256 | 0.54905 | 2.75502 |
| 0.65897 | 1.51545 | 0.54915 | 1.47813 | 0.54915 | 1.91338 | 0.54915 | 2.75611 |
| 0.65908 | 1.516   | 0.54924 | 1.47859 | 0.54924 | 1.91411 | 0.54924 | 2.75666 |
| 0.65919 | 1.51664 | 0.54934 | 1.47886 | 0.54933 | 1.91465 | 0.54933 | 2.75776 |
| 0.6593  | 1.51736 | 0.54944 | 1.47922 | 0.54942 | 1.91529 | 0.54943 | 2.75831 |
| 0.65942 | 1.51782 | 0.54952 | 1.47959 | 0.54952 | 1.91629 | 0.54952 | 2.75967 |
| 0.65953 | 1.51791 | 0.54962 | 1.47996 | 0.54961 | 1.91674 | 0.54961 | 2.76067 |
| 0.65964 | 1.51882 | 0.54971 | 1.48022 | 0.5497  | 1.9172  | 0.5497  | 2.7613  |
| 0.65975 | 1.51954 | 0.5498  | 1.48059 | 0.54979 | 1.91766 | 0.54979 | 2.76231 |
| 0.65986 | 1.52    | 0.54989 | 1.48105 | 0.54988 | 1.91847 | 0.54988 | 2.76304 |
| 0.65997 | 1.52055 | 0.54999 | 1.48105 | 0.54998 | 1.91893 | 0.54998 | 2.76403 |
| 0.66008 | 1.52128 | 0.55008 | 1.4815  | 0.55007 | 1.91938 | 0.55007 | 2.76513 |
| 0.6602  | 1.52191 | 0.55017 | 1.48204 | 0.55016 | 1.92021 | 0.55016 | 2.76604 |
| 0.6603  | 1.52246 | 0.55027 | 1.48241 | 0.55025 | 1.92048 | 0.55026 | 2.76667 |
| 0.66042 | 1.52292 | 0.55036 | 1.48286 | 0.55035 | 1.92094 | 0.55035 | 2.76768 |

|         |         |         |         |         |         |         |         |
|---------|---------|---------|---------|---------|---------|---------|---------|
| 0.66052 | 1.52319 | 0.55045 | 1.48314 | 0.55044 | 1.92185 | 0.55044 | 2.76886 |
| 0.66064 | 1.52382 | 0.55055 | 1.48332 | 0.55053 | 1.92221 | 0.55053 | 2.76959 |
| 0.66075 | 1.52401 | 0.55063 | 1.4836  | 0.55063 | 1.92275 | 0.55063 | 2.77014 |
| 0.66086 | 1.52447 | 0.55073 | 1.48386 | 0.55072 | 1.92348 | 0.55072 | 2.77141 |
| 0.66097 | 1.52528 | 0.55082 | 1.48451 | 0.55081 | 1.92403 | 0.55081 | 2.77278 |
| 0.66108 | 1.52619 | 0.55092 | 1.48477 | 0.55091 | 1.92485 | 0.55091 | 2.77369 |
| 0.6612  | 1.52664 | 0.551   | 1.48477 | 0.551   | 1.92557 | 0.55099 | 2.77523 |
| 0.6613  | 1.5271  | 0.5511  | 1.48514 | 0.55109 | 1.92594 | 0.55109 | 2.77587 |
| 0.66142 | 1.52755 | 0.55119 | 1.48569 | 0.55118 | 1.92703 | 0.55118 | 2.77678 |
| 0.66153 | 1.5281  | 0.55128 | 1.48605 | 0.55128 | 1.92767 | 0.55128 | 2.77823 |
| 0.66164 | 1.52874 | 0.55138 | 1.48642 | 0.55137 | 1.92813 | 0.55137 | 2.77933 |
| 0.66175 | 1.52937 | 0.55147 | 1.48678 | 0.55146 | 1.92885 | 0.55146 | 2.77978 |
| 0.66186 | 1.53029 | 0.55156 | 1.48723 | 0.55155 | 1.92912 | 0.55155 | 2.78124 |
| 0.66197 | 1.53083 | 0.55165 | 1.48787 | 0.55164 | 1.92976 | 0.55164 | 2.78242 |
| 0.66208 | 1.5312  | 0.55175 | 1.48823 | 0.55174 | 1.93004 | 0.55174 | 2.78333 |
| 0.66219 | 1.53174 | 0.55184 | 1.48842 | 0.55183 | 1.93095 | 0.55184 | 2.78443 |
| 0.66231 | 1.53247 | 0.55193 | 1.48915 | 0.55192 | 1.93195 | 0.55192 | 2.78597 |
| 0.66241 | 1.53302 | 0.55203 | 1.48969 | 0.55201 | 1.9324  | 0.55202 | 2.78652 |
| 0.66253 | 1.53356 | 0.55212 | 1.49024 | 0.55211 | 1.93313 | 0.55211 | 2.78752 |
| 0.66264 | 1.53392 | 0.55221 | 1.49069 | 0.5522  | 1.9335  | 0.5522  | 2.78879 |
| 0.66275 | 1.53484 | 0.5523  | 1.49115 | 0.55229 | 1.9344  | 0.55229 | 2.78952 |
| 0.66286 | 1.53539 | 0.55239 | 1.49152 | 0.55239 | 1.93531 | 0.55239 | 2.79088 |
| 0.66297 | 1.53593 | 0.55249 | 1.49206 | 0.55248 | 1.93577 | 0.55248 | 2.79162 |
| 0.66309 | 1.53657 | 0.55258 | 1.49224 | 0.55257 | 1.93614 | 0.55257 | 2.79253 |
| 0.66319 | 1.53729 | 0.55267 | 1.4926  | 0.55267 | 1.93695 | 0.55267 | 2.79344 |
| 0.66331 | 1.53739 | 0.55276 | 1.49324 | 0.55275 | 1.93722 | 0.55275 | 2.79452 |
| 0.66341 | 1.53794 | 0.55286 | 1.49334 | 0.55285 | 1.93778 | 0.55285 | 2.79543 |
| 0.66353 | 1.53857 | 0.55295 | 1.49379 | 0.55294 | 1.9385  | 0.55294 | 2.79644 |
| 0.66363 | 1.5393  | 0.55304 | 1.49443 | 0.55303 | 1.93869 | 0.55303 | 2.79726 |
| 0.66375 | 1.53975 | 0.55314 | 1.4946  | 0.55313 | 1.93923 | 0.55313 | 2.79826 |
| 0.66386 | 1.54057 | 0.55323 | 1.49497 | 0.55322 | 1.94014 | 0.55322 | 2.79972 |
| 0.66397 | 1.54148 | 0.55332 | 1.49533 | 0.55331 | 1.9405  | 0.55331 | 2.80145 |
| 0.66408 | 1.54194 | 0.55341 | 1.49579 | 0.5534  | 1.94123 | 0.5534  | 2.80236 |
| 0.66419 | 1.54221 | 0.55351 | 1.49616 | 0.5535  | 1.94223 | 0.5535  | 2.80345 |
| 0.6643  | 1.54285 | 0.5536  | 1.49688 | 0.55359 | 1.94278 | 0.55359 | 2.80445 |
| 0.66441 | 1.5433  | 0.55369 | 1.49743 | 0.55368 | 1.94333 | 0.55368 | 2.80499 |
| 0.66453 | 1.5443  | 0.55379 | 1.4977  | 0.55377 | 1.94387 | 0.55378 | 2.8059  |
| 0.66464 | 1.54476 | 0.55387 | 1.49815 | 0.55387 | 1.94451 | 0.55387 | 2.80709 |
| 0.66475 | 1.54549 | 0.55397 | 1.49889 | 0.55396 | 1.94524 | 0.55396 | 2.80845 |
| 0.66486 | 1.54594 | 0.55406 | 1.49925 | 0.55405 | 1.94578 | 0.55405 | 2.80927 |
| 0.66497 | 1.54658 | 0.55415 | 1.49989 | 0.55415 | 1.94642 | 0.55415 | 2.80991 |
| 0.66508 | 1.54703 | 0.55425 | 1.50025 | 0.55423 | 1.94696 | 0.55424 | 2.81063 |
| 0.6652  | 1.54758 | 0.55434 | 1.50052 | 0.55433 | 1.9476  | 0.55433 | 2.81136 |
| 0.6653  | 1.54831 | 0.55443 | 1.5008  | 0.55443 | 1.94787 | 0.55443 | 2.81227 |
| 0.66542 | 1.54868 | 0.55452 | 1.50162 | 0.55452 | 1.9487  | 0.55452 | 2.813   |
| 0.66552 | 1.54904 | 0.55462 | 1.50189 | 0.55461 | 1.94924 | 0.55461 | 2.81373 |
| 0.66564 | 1.54949 | 0.55471 | 1.50207 | 0.5547  | 1.94979 | 0.5547  | 2.81491 |
| 0.66575 | 1.55004 | 0.5548  | 1.50298 | 0.55479 | 1.95079 | 0.55479 | 2.8161  |
| 0.66586 | 1.55041 | 0.5549  | 1.50353 | 0.55488 | 1.9517  | 0.55489 | 2.81619 |
| 0.66597 | 1.55131 | 0.55498 | 1.50398 | 0.55498 | 1.95197 | 0.55498 | 2.81755 |
| 0.66608 | 1.55195 | 0.55508 | 1.50453 | 0.55507 | 1.9527  | 0.55507 | 2.8181  |
| 0.6662  | 1.55231 | 0.55517 | 1.5048  | 0.55516 | 1.95343 | 0.55516 | 2.81838 |
| 0.6663  | 1.55305 | 0.55527 | 1.50499 | 0.55526 | 1.95443 | 0.55526 | 2.82019 |
| 0.66642 | 1.55377 | 0.55536 | 1.50553 | 0.55535 | 1.95461 | 0.55535 | 2.82102 |

|         |         |         |         |         |         |         |         |
|---------|---------|---------|---------|---------|---------|---------|---------|
| 0.66652 | 1.55431 | 0.55545 | 1.5058  | 0.55544 | 1.95506 | 0.55544 | 2.82229 |
| 0.66664 | 1.55496 | 0.55555 | 1.50626 | 0.55554 | 1.9557  | 0.55554 | 2.82311 |
| 0.66675 | 1.55559 | 0.55563 | 1.50662 | 0.55563 | 1.95634 | 0.55563 | 2.82338 |
| 0.66686 | 1.55605 | 0.55573 | 1.50671 | 0.55572 | 1.95698 | 0.55572 | 2.82384 |
| 0.66697 | 1.55596 | 0.55582 | 1.50735 | 0.55581 | 1.95744 | 0.55581 | 2.82502 |
| 0.66708 | 1.55641 | 0.55591 | 1.50798 | 0.55591 | 1.95798 | 0.5559  | 2.82593 |
| 0.66719 | 1.55732 | 0.55601 | 1.50808 | 0.55599 | 1.95844 | 0.556   | 2.82693 |
| 0.66731 | 1.55787 | 0.5561  | 1.50835 | 0.55609 | 1.95898 | 0.55609 | 2.82811 |
| 0.66741 | 1.55823 | 0.55619 | 1.50881 | 0.55619 | 1.9598  | 0.55619 | 2.82839 |
| 0.66753 | 1.5585  | 0.55628 | 1.50944 | 0.55628 | 1.96071 | 0.55627 | 2.82948 |
| 0.66764 | 1.55905 | 0.55638 | 1.50999 | 0.55637 | 1.96134 | 0.55637 | 2.83094 |
| 0.66775 | 1.5595  | 0.55646 | 1.51035 | 0.55646 | 1.9618  | 0.55646 | 2.8323  |
| 0.66786 | 1.56014 | 0.55656 | 1.51063 | 0.55655 | 1.9629  | 0.55655 | 2.83294 |
| 0.66797 | 1.56132 | 0.55666 | 1.51081 | 0.55664 | 1.96344 | 0.55665 | 2.83366 |
| 0.66809 | 1.56178 | 0.55674 | 1.51126 | 0.55674 | 1.96435 | 0.55674 | 2.83431 |
| 0.66819 | 1.56251 | 0.55684 | 1.51199 | 0.55683 | 1.9649  | 0.55683 | 2.8353  |
| 0.66831 | 1.56306 | 0.55693 | 1.51244 | 0.55692 | 1.96535 | 0.55692 | 2.83676 |
| 0.66841 | 1.56369 | 0.55703 | 1.5129  | 0.55702 | 1.96599 | 0.55702 | 2.83749 |
| 0.66853 | 1.56405 | 0.55712 | 1.51327 | 0.55711 | 1.96672 | 0.55711 | 2.83804 |
| 0.66863 | 1.5647  | 0.55721 | 1.51363 | 0.5572  | 1.96727 | 0.5572  | 2.83894 |
| 0.66875 | 1.56533 | 0.5573  | 1.51445 | 0.55729 | 1.96818 | 0.5573  | 2.84013 |
| 0.66886 | 1.56605 | 0.55739 | 1.51463 | 0.55739 | 1.96845 | 0.55739 | 2.84095 |
| 0.66897 | 1.56696 | 0.55749 | 1.5149  | 0.55748 | 1.96899 | 0.55748 | 2.84149 |
| 0.66908 | 1.56751 | 0.55758 | 1.51545 | 0.55757 | 1.96944 | 0.55757 | 2.84222 |
| 0.66919 | 1.56788 | 0.55767 | 1.51573 | 0.55766 | 1.97036 | 0.55766 | 2.84332 |
| 0.6693  | 1.56833 | 0.55777 | 1.51627 | 0.55775 | 1.9709  | 0.55776 | 2.84377 |
| 0.66942 | 1.56879 | 0.55786 | 1.51672 | 0.55785 | 1.97154 | 0.55785 | 2.84477 |
| 0.66953 | 1.56951 | 0.55795 | 1.51718 | 0.55795 | 1.97236 | 0.55795 | 2.84577 |
| 0.66964 | 1.57043 | 0.55804 | 1.51763 | 0.55803 | 1.97318 | 0.55803 | 2.84686 |
| 0.66975 | 1.57061 | 0.55814 | 1.5179  | 0.55813 | 1.97364 | 0.55813 | 2.84741 |
| 0.66986 | 1.57125 | 0.55822 | 1.51827 | 0.55822 | 1.97427 | 0.55822 | 2.8485  |
| 0.66997 | 1.57206 | 0.55832 | 1.51864 | 0.55831 | 1.97464 | 0.55831 | 2.84978 |
| 0.67008 | 1.57279 | 0.55841 | 1.51918 | 0.5584  | 1.97537 | 0.55841 | 2.85078 |
| 0.6702  | 1.57316 | 0.5585  | 1.51945 | 0.5585  | 1.97582 | 0.5585  | 2.85151 |
| 0.6703  | 1.57379 | 0.5586  | 1.52    | 0.55859 | 1.97636 | 0.55859 | 2.8525  |
| 0.67042 | 1.57443 | 0.55869 | 1.52036 | 0.55868 | 1.97709 | 0.55868 | 2.85342 |
| 0.67052 | 1.57489 | 0.55878 | 1.52064 | 0.55878 | 1.97746 | 0.55878 | 2.85423 |
| 0.67064 | 1.57562 | 0.55888 | 1.52091 | 0.55887 | 1.9781  | 0.55887 | 2.85505 |
| 0.67075 | 1.57616 | 0.55897 | 1.52146 | 0.55896 | 1.97873 | 0.55896 | 2.85633 |
| 0.67086 | 1.57616 | 0.55906 | 1.52164 | 0.55906 | 1.97946 | 0.55906 | 2.85751 |
| 0.67097 | 1.57698 | 0.55915 | 1.52182 | 0.55915 | 1.9801  | 0.55915 | 2.85888 |
| 0.67108 | 1.57761 | 0.55925 | 1.5221  | 0.55924 | 1.98074 | 0.55924 | 2.85978 |
| 0.6712  | 1.57807 | 0.55934 | 1.52264 | 0.55933 | 1.98155 | 0.55933 | 2.86024 |
| 0.6713  | 1.57889 | 0.55943 | 1.52319 | 0.55942 | 1.98173 | 0.55942 | 2.86097 |
| 0.67142 | 1.57953 | 0.55953 | 1.52373 | 0.55951 | 1.98247 | 0.55952 | 2.86188 |
| 0.67153 | 1.5799  | 0.55962 | 1.52401 | 0.55961 | 1.98328 | 0.55961 | 2.86279 |
| 0.67164 | 1.5808  | 0.55971 | 1.52428 | 0.55971 | 1.98383 | 0.55971 | 2.86389 |
| 0.67175 | 1.58162 | 0.5598  | 1.52491 | 0.55979 | 1.98429 | 0.55979 | 2.86506 |
| 0.67186 | 1.58189 | 0.55989 | 1.52565 | 0.55989 | 1.98501 | 0.55989 | 2.86625 |
| 0.67197 | 1.58272 | 0.55998 | 1.52619 | 0.55998 | 1.98556 | 0.55998 | 2.86789 |
| 0.67208 | 1.58317 | 0.56008 | 1.52647 | 0.56007 | 1.98637 | 0.56007 | 2.86844 |
| 0.67219 | 1.58389 | 0.56018 | 1.52683 | 0.56016 | 1.98692 | 0.56017 | 2.86935 |
| 0.67231 | 1.58444 | 0.56026 | 1.5271  | 0.56026 | 1.98738 | 0.56026 | 2.86998 |
| 0.67241 | 1.5849  | 0.56036 | 1.52764 | 0.56034 | 1.98811 | 0.56035 | 2.87071 |



|         |         |         |         |         |         |         |         |
|---------|---------|---------|---------|---------|---------|---------|---------|
| 0.67253 | 1.5859  | 0.56045 | 1.52801 | 0.56044 | 1.98892 | 0.56044 | 2.87189 |
| 0.67264 | 1.58644 | 0.56054 | 1.52838 | 0.56054 | 1.98938 | 0.56054 | 2.87308 |
| 0.67275 | 1.58699 | 0.56063 | 1.52865 | 0.56063 | 1.98984 | 0.56063 | 2.87381 |
| 0.67286 | 1.58754 | 0.56073 | 1.5292  | 0.56072 | 1.99056 | 0.56072 | 2.87444 |
| 0.67297 | 1.58818 | 0.56082 | 1.52965 | 0.56081 | 1.99102 | 0.56082 | 2.87554 |
| 0.67309 | 1.58872 | 0.56091 | 1.53019 | 0.56091 | 1.99166 | 0.56091 | 2.87626 |
| 0.67319 | 1.58908 | 0.56101 | 1.53074 | 0.561   | 1.99266 | 0.561   | 2.87699 |
| 0.67331 | 1.59017 | 0.56109 | 1.53102 | 0.56109 | 1.9932  | 0.56109 | 2.87863 |
| 0.67341 | 1.59099 | 0.56119 | 1.53147 | 0.56119 | 1.99402 | 0.56118 | 2.87972 |
| 0.67353 | 1.59127 | 0.56128 | 1.53193 | 0.56127 | 1.9943  | 0.56128 | 2.88026 |
| 0.67364 | 1.59181 | 0.56137 | 1.53229 | 0.56137 | 1.99466 | 0.56137 | 2.8819  |
| 0.67375 | 1.59227 | 0.56147 | 1.53284 | 0.56146 | 1.9953  | 0.56146 | 2.88236 |
| 0.67386 | 1.59309 | 0.56156 | 1.5332  | 0.56155 | 1.99602 | 0.56155 | 2.88336 |
| 0.67397 | 1.59382 | 0.56165 | 1.53356 | 0.56165 | 1.99694 | 0.56165 | 2.88472 |
| 0.67408 | 1.59437 | 0.56174 | 1.53366 | 0.56174 | 1.99748 | 0.56174 | 2.88545 |
| 0.67419 | 1.59482 | 0.56184 | 1.53411 | 0.56183 | 1.99802 | 0.56183 | 2.88646 |
| 0.6743  | 1.59546 | 0.56194 | 1.53466 | 0.56192 | 1.99866 | 0.56193 | 2.88773 |
| 0.67442 | 1.59618 | 0.56202 | 1.53493 | 0.56202 | 1.99949 | 0.56202 | 2.88827 |
| 0.67453 | 1.59673 | 0.56212 | 1.53547 | 0.56211 | 2.00012 | 0.56211 | 2.8891  |
| 0.67464 | 1.5971  | 0.56221 | 1.53593 | 0.5622  | 2.00085 | 0.5622  | 2.89009 |
| 0.67475 | 1.59773 | 0.5623  | 1.53657 | 0.5623  | 2.0013  | 0.5623  | 2.89119 |
| 0.67486 | 1.59809 | 0.56239 | 1.53684 | 0.56239 | 2.00176 | 0.56239 | 2.89255 |
| 0.67497 | 1.59846 | 0.56249 | 1.53739 | 0.56248 | 2.00249 | 0.56248 | 2.89446 |
| 0.67508 | 1.59918 | 0.56258 | 1.53793 | 0.56257 | 2.0033  | 0.56257 | 2.8952  |
| 0.6752  | 1.59965 | 0.56267 | 1.53839 | 0.56266 | 2.00385 | 0.56266 | 2.89565 |
| 0.6753  | 1.60065 | 0.56277 | 1.53894 | 0.56276 | 2.00467 | 0.56276 | 2.89692 |
| 0.67542 | 1.6011  | 0.56286 | 1.53921 | 0.56285 | 2.00512 | 0.56285 | 2.89792 |
| 0.67552 | 1.60164 | 0.56295 | 1.53948 | 0.56294 | 2.00603 | 0.56294 | 2.89893 |
| 0.67564 | 1.6021  | 0.56304 | 1.53984 | 0.56303 | 2.0064  | 0.56304 | 2.90011 |
| 0.67575 | 1.60256 | 0.56313 | 1.5403  | 0.56313 | 2.00704 | 0.56313 | 2.90102 |
| 0.67586 | 1.6031  | 0.56323 | 1.54076 | 0.56322 | 2.00759 | 0.56322 | 2.90184 |
| 0.67597 | 1.60392 | 0.56332 | 1.54139 | 0.56331 | 2.00785 | 0.56331 | 2.90302 |
| 0.67608 | 1.60429 | 0.56341 | 1.54184 | 0.56341 | 2.00858 | 0.56341 | 2.90366 |
| 0.6762  | 1.60493 | 0.5635  | 1.54239 | 0.5635  | 2.0094  | 0.56349 | 2.90466 |
| 0.6763  | 1.60574 | 0.5636  | 1.54276 | 0.56359 | 2.00977 | 0.56359 | 2.9062  |
| 0.67642 | 1.60592 | 0.56369 | 1.54321 | 0.56368 | 2.01041 | 0.56369 | 2.90657 |
| 0.67653 | 1.60629 | 0.56378 | 1.54385 | 0.56378 | 2.01114 | 0.56378 | 2.9073  |
| 0.67664 | 1.60711 | 0.56388 | 1.54403 | 0.56387 | 2.01196 | 0.56387 | 2.9083  |
| 0.67675 | 1.60793 | 0.56397 | 1.54421 | 0.56396 | 2.0125  | 0.56396 | 2.9093  |
| 0.67686 | 1.60856 | 0.56406 | 1.54476 | 0.56406 | 2.0135  | 0.56406 | 2.91031 |
| 0.67697 | 1.60892 | 0.56415 | 1.54531 | 0.56414 | 2.01396 | 0.56414 | 2.91176 |
| 0.67708 | 1.60966 | 0.56425 | 1.54557 | 0.56424 | 2.0145  | 0.56424 | 2.9124  |
| 0.67719 | 1.61011 | 0.56434 | 1.54594 | 0.56433 | 2.01532 | 0.56433 | 2.91285 |
| 0.67731 | 1.61065 | 0.56443 | 1.54622 | 0.56442 | 2.01577 | 0.56442 | 2.91386 |
| 0.67741 | 1.61156 | 0.56453 | 1.54639 | 0.56452 | 2.01641 | 0.56452 | 2.91504 |
| 0.67753 | 1.61221 | 0.56462 | 1.54658 | 0.56461 | 2.01696 | 0.56461 | 2.91568 |
| 0.67764 | 1.61339 | 0.56471 | 1.54703 | 0.5647  | 2.01732 | 0.5647  | 2.91676 |
| 0.67775 | 1.61393 | 0.5648  | 1.54749 | 0.56479 | 2.01814 | 0.56479 | 2.91777 |
| 0.67786 | 1.61402 | 0.56489 | 1.54795 | 0.56489 | 2.01887 | 0.56489 | 2.91841 |
| 0.67797 | 1.61457 | 0.56499 | 1.54813 | 0.56497 | 2.01942 | 0.56498 | 2.91958 |
| 0.67809 | 1.61494 | 0.56508 | 1.54849 | 0.56507 | 2.02024 | 0.56507 | 2.9205  |
| 0.67819 | 1.6152  | 0.56517 | 1.54885 | 0.56517 | 2.02124 | 0.56517 | 2.92177 |
| 0.67831 | 1.61557 | 0.56526 | 1.54904 | 0.56525 | 2.02142 | 0.56525 | 2.92277 |
| 0.67841 | 1.61611 | 0.56536 | 1.54931 | 0.56535 | 2.02224 | 0.56535 | 2.92405 |

|         |         |         |         |         |         |         |         |
|---------|---------|---------|---------|---------|---------|---------|---------|
| 0.67853 | 1.61703 | 0.56545 | 1.54976 | 0.56544 | 2.02306 | 0.56545 | 2.9256  |
| 0.67864 | 1.61803 | 0.56554 | 1.55049 | 0.56554 | 2.02378 | 0.56554 | 2.92623 |
| 0.67875 | 1.61885 | 0.56564 | 1.55049 | 0.56562 | 2.02424 | 0.56563 | 2.92696 |
| 0.67886 | 1.6193  | 0.56573 | 1.55113 | 0.56572 | 2.02488 | 0.56572 | 2.92823 |
| 0.67897 | 1.62012 | 0.56582 | 1.55177 | 0.56582 | 2.02551 | 0.56582 | 2.92941 |
| 0.67908 | 1.62039 | 0.56591 | 1.5524  | 0.5659  | 2.02597 | 0.5659  | 2.92978 |
| 0.67919 | 1.62103 | 0.566   | 1.55295 | 0.566   | 2.02715 | 0.566   | 2.93087 |
| 0.6793  | 1.62185 | 0.5661  | 1.55313 | 0.56609 | 2.02733 | 0.56609 | 2.9316  |
| 0.67942 | 1.62267 | 0.56619 | 1.55368 | 0.56618 | 2.02815 | 0.56618 | 2.93297 |
| 0.67953 | 1.62303 | 0.56629 | 1.55414 | 0.56628 | 2.02906 | 0.56628 | 2.93387 |
| 0.67964 | 1.62376 | 0.56637 | 1.55477 | 0.56637 | 2.02979 | 0.56637 | 2.93506 |
| 0.67975 | 1.62422 | 0.56647 | 1.55514 | 0.56646 | 2.03061 | 0.56646 | 2.93606 |
| 0.67986 | 1.62486 | 0.56656 | 1.55559 | 0.56655 | 2.03106 | 0.56655 | 2.93615 |
| 0.67997 | 1.62559 | 0.56665 | 1.55577 | 0.56665 | 2.03162 | 0.56665 | 2.93725 |
| 0.68008 | 1.62622 | 0.56675 | 1.55614 | 0.56673 | 2.03225 | 0.56674 | 2.93825 |
| 0.6802  | 1.62695 | 0.56684 | 1.55659 | 0.56683 | 2.03307 | 0.56683 | 2.93888 |
| 0.6803  | 1.62759 | 0.56693 | 1.55722 | 0.56693 | 2.03352 | 0.56693 | 2.93998 |
| 0.68042 | 1.62822 | 0.56702 | 1.5575  | 0.56701 | 2.03398 | 0.56701 | 2.94097 |
| 0.68052 | 1.62867 | 0.56712 | 1.55813 | 0.56711 | 2.03498 | 0.56711 | 2.94207 |
| 0.68064 | 1.62914 | 0.56721 | 1.55859 | 0.5672  | 2.0358  | 0.56721 | 2.94389 |
| 0.68075 | 1.62968 | 0.5673  | 1.55923 | 0.5673  | 2.03653 | 0.5673  | 2.94453 |
| 0.68086 | 1.6305  | 0.5674  | 1.55986 | 0.56738 | 2.03744 | 0.56739 | 2.94544 |
| 0.68097 | 1.63104 | 0.56749 | 1.56014 | 0.56748 | 2.03771 | 0.56748 | 2.94689 |
| 0.68108 | 1.6315  | 0.56758 | 1.56114 | 0.56757 | 2.03817 | 0.56757 | 2.94744 |
| 0.6812  | 1.63205 | 0.56767 | 1.56178 | 0.56766 | 2.03899 | 0.56766 | 2.94817 |
| 0.6813  | 1.63268 | 0.56776 | 1.5626  | 0.56776 | 2.03953 | 0.56776 | 2.94953 |
| 0.68142 | 1.63341 | 0.56786 | 1.56315 | 0.56785 | 2.04026 | 0.56785 | 2.9508  |
| 0.68153 | 1.63386 | 0.56795 | 1.56369 | 0.56794 | 2.04099 | 0.56794 | 2.95189 |
| 0.68164 | 1.63478 | 0.56804 | 1.56414 | 0.56804 | 2.04172 | 0.56804 | 2.95272 |
| 0.68175 | 1.63514 | 0.56813 | 1.56469 | 0.56813 | 2.04254 | 0.56813 | 2.95344 |
| 0.68186 | 1.63568 | 0.56823 | 1.56515 | 0.56822 | 2.04308 | 0.56822 | 2.95444 |
| 0.68197 | 1.63651 | 0.56832 | 1.56579 | 0.56831 | 2.0439  | 0.56831 | 2.95554 |
| 0.68208 | 1.63705 | 0.56841 | 1.56615 | 0.56841 | 2.04427 | 0.5684  | 2.9569  |
| 0.68219 | 1.63733 | 0.56851 | 1.5667  | 0.56849 | 2.04527 | 0.5685  | 2.95781 |
| 0.68231 | 1.63815 | 0.5686  | 1.56733 | 0.56859 | 2.0459  | 0.56859 | 2.95909 |
| 0.68241 | 1.6386  | 0.56869 | 1.56787 | 0.56868 | 2.04636 | 0.56868 | 2.96009 |
| 0.68253 | 1.63924 | 0.56878 | 1.56833 | 0.56877 | 2.04727 | 0.56877 | 2.961   |
| 0.68264 | 1.64014 | 0.56888 | 1.56888 | 0.56887 | 2.04754 | 0.56887 | 2.96228 |
| 0.68275 | 1.6406  | 0.56897 | 1.56969 | 0.56896 | 2.04827 | 0.56897 | 2.96319 |
| 0.68286 | 1.64105 | 0.56906 | 1.57016 | 0.56905 | 2.04891 | 0.56905 | 2.96382 |
| 0.68297 | 1.6417  | 0.56916 | 1.5706  | 0.56914 | 2.04991 | 0.56915 | 2.96492 |
| 0.68309 | 1.64197 | 0.56924 | 1.57134 | 0.56924 | 2.05018 | 0.56924 | 2.96537 |
| 0.68319 | 1.64296 | 0.56934 | 1.57188 | 0.56933 | 2.05082 | 0.56933 | 2.96646 |
| 0.68331 | 1.64351 | 0.56943 | 1.57206 | 0.56942 | 2.05164 | 0.56942 | 2.96782 |
| 0.68341 | 1.64406 | 0.56953 | 1.5727  | 0.56952 | 2.05182 | 0.56952 | 2.96856 |
| 0.68353 | 1.64479 | 0.56962 | 1.57297 | 0.56961 | 2.05236 | 0.56961 | 2.97001 |
| 0.68364 | 1.64542 | 0.56971 | 1.57361 | 0.5697  | 2.053   | 0.5697  | 2.97129 |
| 0.68375 | 1.6457  | 0.5698  | 1.57388 | 0.5698  | 2.05373 | 0.5698  | 2.97274 |
| 0.68386 | 1.64652 | 0.56989 | 1.57425 | 0.56989 | 2.05473 | 0.56989 | 2.97329 |
| 0.68397 | 1.64743 | 0.56999 | 1.57461 | 0.56998 | 2.05528 | 0.56998 | 2.97502 |
| 0.68408 | 1.64797 | 0.57008 | 1.57507 | 0.57007 | 2.05573 | 0.57007 | 2.97593 |
| 0.68419 | 1.64843 | 0.57017 | 1.57543 | 0.57016 | 2.05637 | 0.57016 | 2.97693 |
| 0.6843  | 1.64916 | 0.57027 | 1.57552 | 0.57025 | 2.05719 | 0.57026 | 2.97811 |
| 0.68442 | 1.6498  | 0.57036 | 1.57589 | 0.57035 | 2.0581  | 0.57035 | 2.97938 |

|         |         |         |         |         |         |         |         |
|---------|---------|---------|---------|---------|---------|---------|---------|
| 0.68453 | 1.65043 | 0.57045 | 1.57643 | 0.57045 | 2.05873 | 0.57045 | 2.98038 |
| 0.68464 | 1.65107 | 0.57054 | 1.5768  | 0.57053 | 2.05919 | 0.57053 | 2.9812  |
| 0.68475 | 1.65162 | 0.57064 | 1.57725 | 0.57063 | 2.05964 | 0.57063 | 2.9823  |
| 0.68486 | 1.65207 | 0.57073 | 1.5778  | 0.57072 | 2.06064 | 0.57073 | 2.9833  |
| 0.68497 | 1.65279 | 0.57082 | 1.57789 | 0.57081 | 2.06101 | 0.57081 | 2.98448 |
| 0.68508 | 1.65316 | 0.57091 | 1.57852 | 0.5709  | 2.06129 | 0.57091 | 2.98512 |
| 0.6852  | 1.65407 | 0.571   | 1.57871 | 0.571   | 2.06192 | 0.571   | 2.98612 |
| 0.6853  | 1.65471 | 0.5711  | 1.57916 | 0.57109 | 2.06301 | 0.57109 | 2.98722 |
| 0.68542 | 1.65562 | 0.57119 | 1.57961 | 0.57118 | 2.06411 | 0.57118 | 2.98831 |
| 0.68552 | 1.65626 | 0.57128 | 1.57989 | 0.57128 | 2.06466 | 0.57128 | 2.98913 |
| 0.68564 | 1.65681 | 0.57138 | 1.57998 | 0.57136 | 2.06538 | 0.57136 | 2.99049 |
| 0.68575 | 1.65698 | 0.57147 | 1.58043 | 0.57146 | 2.06593 | 0.57146 | 2.99195 |
| 0.68586 | 1.65771 | 0.57156 | 1.58089 | 0.57156 | 2.06675 | 0.57156 | 2.99286 |
| 0.68597 | 1.65853 | 0.57165 | 1.58116 | 0.57164 | 2.06756 | 0.57164 | 2.99349 |
| 0.68608 | 1.65899 | 0.57175 | 1.58134 | 0.57174 | 2.06802 | 0.57174 | 2.99468 |
| 0.6862  | 1.65971 | 0.57184 | 1.58153 | 0.57183 | 2.06875 | 0.57183 | 2.99522 |
| 0.6863  | 1.66081 | 0.57193 | 1.58198 | 0.57192 | 2.0692  | 0.57192 | 2.99622 |
| 0.68642 | 1.66071 | 0.57203 | 1.58244 | 0.57201 | 2.06984 | 0.57202 | 2.99741 |
| 0.68653 | 1.66117 | 0.57212 | 1.5829  | 0.57211 | 2.07038 | 0.57211 | 2.99813 |
| 0.68664 | 1.66145 | 0.57221 | 1.58353 | 0.57221 | 2.0713  | 0.57221 | 2.99877 |
| 0.68675 | 1.66217 | 0.5723  | 1.58381 | 0.57229 | 2.07203 | 0.57229 | 2.99968 |
| 0.68686 | 1.66299 | 0.5724  | 1.58398 | 0.57239 | 2.07284 | 0.57239 | 3.00077 |
| 0.68697 | 1.66372 | 0.57248 | 1.58453 | 0.57248 | 2.07321 | 0.57248 | 3.00196 |
| 0.68708 | 1.66454 | 0.57258 | 1.58517 | 0.57257 | 2.07384 | 0.57257 | 3.00305 |
| 0.68719 | 1.66509 | 0.57267 | 1.58526 | 0.57266 | 2.07485 | 0.57267 | 3.00432 |
| 0.68731 | 1.6659  | 0.57276 | 1.58563 | 0.57276 | 2.07585 | 0.57276 | 3.00532 |
| 0.68741 | 1.66627 | 0.57286 | 1.58617 | 0.57285 | 2.07648 | 0.57285 | 3.00633 |
| 0.68753 | 1.66627 | 0.57295 | 1.58617 | 0.57294 | 2.07703 | 0.57294 | 3.00751 |
| 0.68764 | 1.66718 | 0.57304 | 1.58681 | 0.57304 | 2.07731 | 0.57304 | 3.00851 |
| 0.68775 | 1.66782 | 0.57314 | 1.58717 | 0.57313 | 2.07794 | 0.57313 | 3.00942 |
| 0.68786 | 1.66818 | 0.57323 | 1.58745 | 0.57322 | 2.07885 | 0.57322 | 3.01061 |
| 0.68797 | 1.66873 | 0.57332 | 1.5879  | 0.57331 | 2.07949 | 0.57331 | 3.01197 |
| 0.68809 | 1.66937 | 0.57341 | 1.58808 | 0.5734  | 2.08012 | 0.5734  | 3.0127  |
| 0.68819 | 1.67019 | 0.57351 | 1.58835 | 0.5735  | 2.08095 | 0.5735  | 3.0137  |
| 0.68831 | 1.67119 | 0.57359 | 1.58899 | 0.57359 | 2.0814  | 0.57359 | 3.0147  |
| 0.68841 | 1.672   | 0.57369 | 1.58972 | 0.57368 | 2.08203 | 0.57368 | 3.01543 |
| 0.68853 | 1.67246 | 0.57379 | 1.59027 | 0.57377 | 2.08295 | 0.57378 | 3.01634 |
| 0.68864 | 1.67291 | 0.57388 | 1.59045 | 0.57387 | 2.08395 | 0.57387 | 3.01725 |
| 0.68875 | 1.67355 | 0.57397 | 1.59091 | 0.57396 | 2.08458 | 0.57396 | 3.01844 |
| 0.68886 | 1.67409 | 0.57406 | 1.59126 | 0.57405 | 2.08541 | 0.57405 | 3.0188  |
| 0.68897 | 1.67473 | 0.57416 | 1.59163 | 0.57415 | 2.08586 | 0.57415 | 3.02025 |
| 0.68908 | 1.67555 | 0.57424 | 1.59218 | 0.57424 | 2.08668 | 0.57424 | 3.02126 |
| 0.68919 | 1.67637 | 0.57434 | 1.59245 | 0.57433 | 2.08705 | 0.57433 | 3.0218  |
| 0.6893  | 1.67719 | 0.57443 | 1.59282 | 0.57442 | 2.0875  | 0.57443 | 3.02326 |
| 0.68942 | 1.67756 | 0.57452 | 1.59318 | 0.57452 | 2.08841 | 0.57452 | 3.02453 |
| 0.68953 | 1.67829 | 0.57462 | 1.59372 | 0.57461 | 2.08913 | 0.57461 | 3.02517 |
| 0.68964 | 1.67901 | 0.57471 | 1.59427 | 0.5747  | 2.08986 | 0.5747  | 3.02599 |
| 0.68975 | 1.67928 | 0.5748  | 1.595   | 0.5748  | 2.09032 | 0.5748  | 3.02708 |
| 0.68986 | 1.67992 | 0.57489 | 1.59537 | 0.57489 | 2.09105 | 0.57489 | 3.02781 |
| 0.68998 | 1.68056 | 0.57499 | 1.59537 | 0.57498 | 2.09177 | 0.57498 | 3.02881 |
| 0.69008 | 1.68138 | 0.57508 | 1.59582 | 0.57507 | 2.09241 | 0.57507 | 3.03017 |
| 0.6902  | 1.68201 | 0.57517 | 1.59636 | 0.57516 | 2.09314 | 0.57516 | 3.03117 |
| 0.6903  | 1.68238 | 0.57527 | 1.59654 | 0.57526 | 2.09378 | 0.57526 | 3.03236 |
| 0.69042 | 1.68301 | 0.57535 | 1.59728 | 0.57535 | 2.09433 | 0.57535 | 3.03364 |

|         |         |         |         |         |         |         |         |
|---------|---------|---------|---------|---------|---------|---------|---------|
| 0.69052 | 1.68357 | 0.57545 | 1.59746 | 0.57544 | 2.09532 | 0.57544 | 3.03464 |
| 0.69064 | 1.68474 | 0.57555 | 1.59792 | 0.57553 | 2.09606 | 0.57554 | 3.03527 |
| 0.69075 | 1.68529 | 0.57564 | 1.59819 | 0.57563 | 2.09669 | 0.57563 | 3.03655 |
| 0.69086 | 1.68575 | 0.57573 | 1.59855 | 0.57572 | 2.09733 | 0.57572 | 3.03736 |
| 0.69097 | 1.68657 | 0.57582 | 1.59937 | 0.57581 | 2.09778 | 0.57581 | 3.03855 |
| 0.69108 | 1.68702 | 0.57592 | 1.59973 | 0.57591 | 2.09878 | 0.57591 | 3.03991 |
| 0.6912  | 1.68756 | 0.576   | 1.59991 | 0.576   | 2.09978 | 0.576   | 3.04119 |
| 0.6913  | 1.68821 | 0.5761  | 1.60019 | 0.57609 | 2.10069 | 0.57609 | 3.04201 |
| 0.69142 | 1.68839 | 0.57619 | 1.60101 | 0.57618 | 2.10124 | 0.57619 | 3.04319 |
| 0.69153 | 1.68921 | 0.57628 | 1.60182 | 0.57627 | 2.1017  | 0.57627 | 3.04428 |
| 0.69164 | 1.69002 | 0.57638 | 1.60228 | 0.57637 | 2.10225 | 0.57637 | 3.04546 |
| 0.69175 | 1.6903  | 0.57647 | 1.60256 | 0.57646 | 2.10325 | 0.57646 | 3.04638 |
| 0.69186 | 1.69094 | 0.57656 | 1.60292 | 0.57656 | 2.10388 | 0.57656 | 3.04792 |
| 0.69197 | 1.69148 | 0.57665 | 1.60338 | 0.57664 | 2.10461 | 0.57665 | 3.04902 |
| 0.69209 | 1.69203 | 0.57675 | 1.60392 | 0.57674 | 2.10524 | 0.57674 | 3.05047 |
| 0.69219 | 1.69266 | 0.57684 | 1.60438 | 0.57683 | 2.10561 | 0.57683 | 3.05101 |
| 0.69231 | 1.69366 | 0.57693 | 1.60492 | 0.57692 | 2.10625 | 0.57692 | 3.05202 |
| 0.69241 | 1.69394 | 0.57703 | 1.6052  | 0.57701 | 2.10706 | 0.57702 | 3.05329 |
| 0.69253 | 1.69467 | 0.57711 | 1.60537 | 0.57711 | 2.10688 | 0.57711 | 3.05456 |
| 0.69264 | 1.69522 | 0.57721 | 1.60611 | 0.5772  | 2.1068  | 0.5772  | 3.05566 |
| 0.69275 | 1.69594 | 0.57731 | 1.60647 | 0.57729 | 2.10825 | 0.5773  | 3.05675 |
| 0.69286 | 1.69676 | 0.57739 | 1.60674 | 0.57739 | 2.10879 | 0.57739 | 3.05748 |
| 0.69297 | 1.69721 | 0.57749 | 1.60738 | 0.57748 | 2.10916 | 0.57748 | 3.05885 |
| 0.69309 | 1.69785 | 0.57758 | 1.60802 | 0.57757 | 2.11016 | 0.57757 | 3.05939 |
| 0.69319 | 1.69849 | 0.57767 | 1.60884 | 0.57767 | 2.11161 | 0.57767 | 3.06003 |
| 0.69331 | 1.69912 | 0.57776 | 1.60929 | 0.57776 | 2.11208 | 0.57776 | 3.06149 |
| 0.69341 | 1.69958 | 0.57786 | 1.60975 | 0.57785 | 2.11271 | 0.57785 | 3.06322 |
| 0.69353 | 1.70031 | 0.57795 | 1.60993 | 0.57794 | 2.11362 | 0.57795 | 3.06413 |
| 0.69364 | 1.70077 | 0.57804 | 1.61029 | 0.57803 | 2.1138  | 0.57803 | 3.0654  |
| 0.69375 | 1.70149 | 0.57814 | 1.61075 | 0.57813 | 2.11444 | 0.57813 | 3.06667 |
| 0.69386 | 1.70249 | 0.57823 | 1.61111 | 0.57822 | 2.1148  | 0.57822 | 3.06758 |
| 0.69397 | 1.70295 | 0.57832 | 1.61156 | 0.57832 | 2.1159  | 0.57832 | 3.06894 |
| 0.69408 | 1.70322 | 0.57841 | 1.61165 | 0.5784  | 2.11644 | 0.5784  | 3.06968 |
| 0.6942  | 1.70404 | 0.5785  | 1.6123  | 0.5785  | 2.11689 | 0.5785  | 3.07049 |
| 0.6943  | 1.70477 | 0.5786  | 1.61275 | 0.57859 | 2.11835 | 0.57859 | 3.07213 |
| 0.69442 | 1.70495 | 0.57869 | 1.61302 | 0.57868 | 2.11926 | 0.57868 | 3.0735  |
| 0.69453 | 1.70559 | 0.57879 | 1.61393 | 0.57878 | 2.11999 | 0.57878 | 3.07413 |
| 0.69464 | 1.70668 | 0.57887 | 1.61448 | 0.57887 | 2.12063 | 0.57887 | 3.07568 |
| 0.69475 | 1.70695 | 0.57897 | 1.61494 | 0.57896 | 2.12108 | 0.57896 | 3.07686 |
| 0.69486 | 1.70768 | 0.57907 | 1.61557 | 0.57905 | 2.12181 | 0.57906 | 3.07759 |
| 0.69497 | 1.70878 | 0.57915 | 1.61585 | 0.57915 | 2.12245 | 0.57915 | 3.07905 |
| 0.69508 | 1.70923 | 0.57925 | 1.61611 | 0.57924 | 2.12318 | 0.57924 | 3.07996 |
| 0.6952  | 1.70969 | 0.57934 | 1.61657 | 0.57933 | 2.12327 | 0.57933 | 3.08078 |
| 0.6953  | 1.71042 | 0.57943 | 1.61703 | 0.57943 | 2.12381 | 0.57943 | 3.08242 |
| 0.69542 | 1.71105 | 0.57952 | 1.61748 | 0.57951 | 2.1249  | 0.57951 | 3.08351 |
| 0.69552 | 1.71187 | 0.57962 | 1.61776 | 0.57961 | 2.12545 | 0.57961 | 3.08442 |
| 0.69564 | 1.71223 | 0.57971 | 1.61812 | 0.5797  | 2.12654 | 0.5797  | 3.08542 |
| 0.69575 | 1.71305 | 0.5798  | 1.61848 | 0.5798  | 2.12736 | 0.5798  | 3.08606 |
| 0.69586 | 1.71369 | 0.5799  | 1.61875 | 0.57989 | 2.12819 | 0.57989 | 3.08688 |
| 0.69597 | 1.71451 | 0.57998 | 1.61893 | 0.57998 | 2.1291  | 0.57998 | 3.08852 |
| 0.69608 | 1.71523 | 0.58008 | 1.61967 | 0.58007 | 2.12964 | 0.58007 | 3.08961 |
| 0.6962  | 1.71606 | 0.58017 | 1.62012 | 0.58016 | 2.13055 | 0.58016 | 3.08997 |
| 0.6963  | 1.71679 | 0.58026 | 1.62076 | 0.58026 | 2.13146 | 0.58026 | 3.09161 |
| 0.69642 | 1.71724 | 0.58036 | 1.62121 | 0.58035 | 2.13219 | 0.58035 | 3.09279 |

|         |         |         |         |         |         |         |         |
|---------|---------|---------|---------|---------|---------|---------|---------|
| 0.69653 | 1.71797 | 0.58045 | 1.62148 | 0.58044 | 2.13274 | 0.58044 | 3.09325 |
| 0.69664 | 1.7187  | 0.58055 | 1.62194 | 0.58053 | 2.13356 | 0.58054 | 3.09489 |
| 0.69675 | 1.71915 | 0.58063 | 1.62249 | 0.58063 | 2.13392 | 0.58063 | 3.09616 |
| 0.69686 | 1.72024 | 0.58073 | 1.62285 | 0.58072 | 2.13473 | 0.58072 | 3.09716 |
| 0.69697 | 1.72116 | 0.58083 | 1.6234  | 0.58081 | 2.13547 | 0.58081 | 3.09807 |
| 0.69708 | 1.72161 | 0.58091 | 1.62385 | 0.58091 | 2.13629 | 0.58091 | 3.09907 |
| 0.69719 | 1.72225 | 0.58101 | 1.6244  | 0.581   | 2.1371  | 0.581   | 3.0998  |
| 0.69731 | 1.72279 | 0.5811  | 1.62494 | 0.58109 | 2.13756 | 0.58109 | 3.10153 |
| 0.69741 | 1.72307 | 0.58119 | 1.62522 | 0.58118 | 2.13811 | 0.58118 | 3.10208 |
| 0.69753 | 1.72379 | 0.58128 | 1.62558 | 0.58127 | 2.13874 | 0.58127 | 3.10299 |
| 0.69764 | 1.72461 | 0.58138 | 1.62594 | 0.58137 | 2.13965 | 0.58137 | 3.10462 |
| 0.69775 | 1.72497 | 0.58147 | 1.6264  | 0.58146 | 2.14056 | 0.58146 | 3.10617 |
| 0.69786 | 1.7257  | 0.58156 | 1.62686 | 0.58155 | 2.14102 | 0.58155 | 3.107   |
| 0.69797 | 1.72643 | 0.58166 | 1.62731 | 0.58165 | 2.14147 | 0.58165 | 3.10808 |
| 0.69809 | 1.72706 | 0.58174 | 1.62776 | 0.58174 | 2.14247 | 0.58174 | 3.10917 |
| 0.69819 | 1.72789 | 0.58184 | 1.62831 | 0.58183 | 2.14347 | 0.58183 | 3.10945 |
| 0.69831 | 1.72879 | 0.58193 | 1.62886 | 0.58192 | 2.14338 | 0.58192 | 3.11036 |
| 0.69841 | 1.72952 | 0.58202 | 1.62904 | 0.58202 | 2.14411 | 0.58202 | 3.11109 |
| 0.69853 | 1.73017 | 0.58212 | 1.62941 | 0.58211 | 2.14466 | 0.58211 | 3.11236 |
| 0.69863 | 1.73035 | 0.58221 | 1.62968 | 0.5822  | 2.14521 | 0.5822  | 3.11382 |
| 0.69875 | 1.73108 | 0.5823  | 1.63013 | 0.58229 | 2.14575 | 0.5823  | 3.11491 |
| 0.69886 | 1.73153 | 0.58239 | 1.63068 | 0.58239 | 2.14657 | 0.58239 | 3.11582 |
| 0.69897 | 1.73244 | 0.58249 | 1.63095 | 0.58248 | 2.14793 | 0.58248 | 3.11701 |
| 0.69908 | 1.73307 | 0.58258 | 1.63149 | 0.58257 | 2.14939 | 0.58258 | 3.11782 |
| 0.69919 | 1.7339  | 0.58267 | 1.63214 | 0.58267 | 2.14948 | 0.58267 | 3.11873 |
| 0.6993  | 1.73444 | 0.58277 | 1.63259 | 0.58275 | 2.14976 | 0.58276 | 3.11974 |
| 0.69942 | 1.73489 | 0.58286 | 1.63286 | 0.58285 | 2.15075 | 0.58285 | 3.12074 |
| 0.69953 | 1.73563 | 0.58295 | 1.63341 | 0.58294 | 2.15166 | 0.58294 | 3.12183 |
| 0.69964 | 1.73662 | 0.58304 | 1.63396 | 0.58303 | 2.1524  | 0.58303 | 3.12274 |
| 0.69975 | 1.73735 | 0.58314 | 1.63432 | 0.58313 | 2.15348 | 0.58313 | 3.12392 |
| 0.69986 | 1.73817 | 0.58323 | 1.6345  | 0.58322 | 2.15376 | 0.58322 | 3.12465 |
| 0.69997 | 1.7389  | 0.58332 | 1.63496 | 0.58331 | 2.15485 | 0.58331 | 3.12601 |
| 0.70008 | 1.73936 | 0.58341 | 1.63559 | 0.5834  | 2.15522 | 0.58341 | 3.1272  |
|         |         | 0.5835  | 1.63568 | 0.5835  | 2.15621 | 0.5835  | 3.12829 |
|         |         | 0.5836  | 1.63605 | 0.58359 | 2.15703 | 0.58359 | 3.1292  |
|         |         | 0.58369 | 1.63669 | 0.58368 | 2.15777 | 0.58368 | 3.13038 |
|         |         | 0.58378 | 1.63687 | 0.58378 | 2.15859 | 0.58378 | 3.13156 |
|         |         | 0.58388 | 1.63741 | 0.58386 | 2.15895 | 0.58387 | 3.13221 |
|         |         | 0.58397 | 1.63787 | 0.58396 | 2.15977 | 0.58396 | 3.13403 |
|         |         | 0.58406 | 1.63823 | 0.58405 | 2.1605  | 0.58406 | 3.1353  |
|         |         | 0.58415 | 1.63897 | 0.58415 | 2.16113 | 0.58415 | 3.13667 |
|         |         | 0.58425 | 1.63942 | 0.58424 | 2.16159 | 0.58424 | 3.13821 |
|         |         | 0.58434 | 1.63978 | 0.58433 | 2.1625  | 0.58434 | 3.13912 |
|         |         | 0.58443 | 1.64042 | 0.58443 | 2.16323 | 0.58443 | 3.14013 |
|         |         | 0.58453 | 1.6406  | 0.58451 | 2.16368 | 0.58452 | 3.14167 |
|         |         | 0.58462 | 1.64078 | 0.58461 | 2.16477 | 0.58461 | 3.14231 |
|         |         | 0.58471 | 1.64142 | 0.5847  | 2.1655  | 0.5847  | 3.14358 |
|         |         | 0.5848  | 1.64188 | 0.58479 | 2.16604 | 0.58479 | 3.14449 |
|         |         | 0.5849  | 1.64251 | 0.58489 | 2.16659 | 0.58489 | 3.14549 |
|         |         | 0.58499 | 1.64315 | 0.58498 | 2.16751 | 0.58498 | 3.14668 |
|         |         | 0.58508 | 1.64342 | 0.58507 | 2.16823 | 0.58507 | 3.14804 |
|         |         | 0.58517 | 1.6436  | 0.58517 | 2.16905 | 0.58517 | 3.14859 |
|         |         | 0.58526 | 1.64424 | 0.58526 | 2.16978 | 0.58526 | 3.14959 |
|         |         | 0.58536 | 1.6447  | 0.58535 | 2.1706  | 0.58535 | 3.15104 |

|         |         |         |         |         |         |
|---------|---------|---------|---------|---------|---------|
| 0.58545 | 1.64515 | 0.58544 | 2.17114 | 0.58544 | 3.15223 |
| 0.58554 | 1.64552 | 0.58554 | 2.17169 | 0.58554 | 3.15323 |
| 0.58564 | 1.64625 | 0.58562 | 2.17242 | 0.58563 | 3.15487 |
| 0.58573 | 1.64688 | 0.58572 | 2.17333 | 0.58572 | 3.15596 |
| 0.58582 | 1.64734 | 0.58582 | 2.17451 | 0.58582 | 3.15678 |
| 0.58591 | 1.64743 | 0.58591 | 2.17524 | 0.58591 | 3.15797 |
| 0.58601 | 1.64806 | 0.586   | 2.17597 | 0.586   | 3.15887 |
| 0.5861  | 1.64852 | 0.58609 | 2.17706 | 0.58609 | 3.16024 |
| 0.58619 | 1.64861 | 0.58619 | 2.1776  | 0.58618 | 3.1617  |
| 0.58629 | 1.64898 | 0.58627 | 2.1787  | 0.58628 | 3.16297 |
| 0.58637 | 1.64943 | 0.58637 | 2.17933 | 0.58637 | 3.16379 |
| 0.58647 | 1.64979 | 0.58646 | 2.17951 | 0.58646 | 3.16479 |
| 0.58656 | 1.65006 | 0.58655 | 2.18034 | 0.58655 | 3.16588 |
| 0.58665 | 1.65052 | 0.58665 | 2.18143 | 0.58665 | 3.1667  |
| 0.58674 | 1.65106 | 0.58674 | 2.18225 | 0.58674 | 3.16779 |
| 0.58684 | 1.65198 | 0.58683 | 2.18316 | 0.58683 | 3.16898 |
| 0.58693 | 1.65253 | 0.58692 | 2.18416 | 0.58693 | 3.1708  |
| 0.58702 | 1.65307 | 0.58702 | 2.18453 | 0.58702 | 3.17189 |
| 0.58712 | 1.65371 | 0.5871  | 2.18479 | 0.58711 | 3.17317 |
| 0.58721 | 1.65471 | 0.5872  | 2.18562 | 0.5872  | 3.17343 |
| 0.5873  | 1.65516 | 0.58729 | 2.18625 | 0.58729 | 3.17516 |
| 0.5874  | 1.65526 | 0.58738 | 2.18726 | 0.58739 | 3.17589 |
| 0.58749 | 1.65589 | 0.58748 | 2.18808 | 0.58748 | 3.17717 |
| 0.58758 | 1.65617 | 0.58757 | 2.18834 | 0.58758 | 3.17871 |
| 0.58767 | 1.65635 | 0.58766 | 2.18925 | 0.58766 | 3.17899 |
| 0.58777 | 1.65708 | 0.58776 | 2.19025 | 0.58776 | 3.18017 |
| 0.58785 | 1.65744 | 0.58785 | 2.19044 | 0.58785 | 3.18127 |
| 0.58795 | 1.6578  | 0.58794 | 2.19126 | 0.58794 | 3.18154 |
| 0.58804 | 1.65844 | 0.58803 | 2.19199 | 0.58804 | 3.18253 |
| 0.58814 | 1.6589  | 0.58813 | 2.1929  | 0.58813 | 3.18391 |
| 0.58823 | 1.65935 | 0.58822 | 2.19353 | 0.58822 | 3.18499 |
| 0.58832 | 1.65963 | 0.58831 | 2.19408 | 0.58831 | 3.186   |
| 0.58841 | 1.66007 | 0.58841 | 2.19472 | 0.58841 | 3.18736 |
| 0.5885  | 1.66062 | 0.5885  | 2.19554 | 0.5885  | 3.18864 |
| 0.5886  | 1.66089 | 0.58859 | 2.19635 | 0.58859 | 3.18964 |
| 0.58869 | 1.66117 | 0.58868 | 2.1969  | 0.58869 | 3.19073 |
| 0.58878 | 1.66181 | 0.58877 | 2.19772 | 0.58877 | 3.19164 |
| 0.58888 | 1.66244 | 0.58886 | 2.19863 | 0.58887 | 3.19291 |
| 0.58897 | 1.66281 | 0.58896 | 2.19963 | 0.58896 | 3.1941  |
| 0.58906 | 1.66317 | 0.58906 | 2.20036 | 0.58906 | 3.19501 |
| 0.58916 | 1.66353 | 0.58914 | 2.201   | 0.58915 | 3.19647 |
| 0.58925 | 1.66408 | 0.58924 | 2.20155 | 0.58924 | 3.19792 |
| 0.58934 | 1.66454 | 0.58933 | 2.20272 | 0.58934 | 3.19874 |
| 0.58943 | 1.6649  | 0.58942 | 2.20363 | 0.58942 | 3.19974 |
| 0.58953 | 1.66526 | 0.58952 | 2.20445 | 0.58952 | 3.20083 |
| 0.58961 | 1.66572 | 0.58961 | 2.20491 | 0.58961 | 3.2021  |
| 0.58971 | 1.66654 | 0.5897  | 2.20564 | 0.5897  | 3.20338 |
| 0.58981 | 1.667   | 0.58979 | 2.20637 | 0.5898  | 3.20448 |
| 0.58989 | 1.66736 | 0.58989 | 2.20719 | 0.58989 | 3.20565 |
| 0.58999 | 1.66818 | 0.58997 | 2.20773 | 0.58998 | 3.20702 |
| 0.59008 | 1.66864 | 0.59007 | 2.20837 | 0.59007 | 3.20784 |
| 0.59017 | 1.669   | 0.59017 | 2.20937 | 0.59017 | 3.20894 |
| 0.59026 | 1.66936 | 0.59025 | 2.21037 | 0.59025 | 3.21048 |
| 0.59036 | 1.6699  | 0.59035 | 2.21074 | 0.59035 | 3.21185 |

|          |          |          |          |          |          |
|----------|----------|----------|----------|----------|----------|
| 0. 59045 | 1. 67036 | 0. 59044 | 2. 21165 | 0. 59045 | 3. 21275 |
| 0. 59054 | 1. 67082 | 0. 59053 | 2. 21229 | 0. 59053 | 3. 21403 |
| 0. 59064 | 1. 671   | 0. 59062 | 2. 2132  | 0. 59063 | 3. 2154  |
| 0. 59073 | 1. 67155 | 0. 59072 | 2. 21402 | 0. 59072 | 3. 2164  |
| 0. 59082 | 1. 67227 | 0. 59082 | 2. 21456 | 0. 59082 | 3. 2174  |
| 0. 59092 | 1. 67273 | 0. 5909  | 2. 21483 | 0. 5909  | 3. 21821 |
| 0. 59101 | 1. 67318 | 0. 591   | 2. 21511 | 0. 591   | 3. 21894 |
| 0. 5911  | 1. 67401 | 0. 59109 | 2. 21602 | 0. 59109 | 3. 22004 |
| 0. 59119 | 1. 67455 | 0. 59118 | 2. 21684 | 0. 59118 | 3. 22122 |
| 0. 59128 | 1. 67509 | 0. 59128 | 2. 21729 | 0. 59128 | 3. 22204 |
| 0. 59137 | 1. 67573 | 0. 59137 | 2. 21784 | 0. 59137 | 3. 22277 |
| 0. 59147 | 1. 67628 | 0. 59146 | 2. 21856 | 0. 59146 | 3. 22413 |
| 0. 59156 | 1. 67665 | 0. 59155 | 2. 21966 | 0. 59155 | 3. 22531 |
| 0. 59165 | 1. 67682 | 0. 59165 | 2. 22011 | 0. 59165 | 3. 22659 |
| 0. 59175 | 1. 67737 | 0. 59174 | 2. 22075 | 0. 59174 | 3. 22832 |
| 0. 59184 | 1. 67773 | 0. 59183 | 2. 22184 | 0. 59183 | 3. 22951 |
| 0. 59193 | 1. 67819 | 0. 59193 | 2. 22248 | 0. 59193 | 3. 2305  |
| 0. 59202 | 1. 67856 | 0. 59201 | 2. 22302 | 0. 59201 | 3. 23178 |
| 0. 59212 | 1. 67883 | 0. 59211 | 2. 22393 | 0. 59211 | 3. 23269 |
| 0. 59221 | 1. 6791  | 0. 5922  | 2. 22484 | 0. 5922  | 3. 23424 |
| 0. 5923  | 1. 67964 | 0. 59229 | 2. 22521 | 0. 59229 | 3. 23569 |
| 0. 5924  | 1. 68037 | 0. 59239 | 2. 22593 | 0. 59239 | 3. 23706 |
| 0. 59249 | 1. 68074 | 0. 59248 | 2. 22667 | 0. 59248 | 3. 23787 |
| 0. 59258 | 1. 68111 | 0. 59257 | 2. 22721 | 0. 59257 | 3. 23924 |
| 0. 59267 | 1. 68174 | 0. 59266 | 2. 22839 | 0. 59266 | 3. 24006 |
| 0. 59277 | 1. 6821  | 0. 59276 | 2. 22913 | 0. 59276 | 3. 24134 |
| 0. 59286 | 1. 68256 | 0. 59285 | 2. 22939 | 0. 59285 | 3. 24252 |
| 0. 59295 | 1. 6831  | 0. 59294 | 2. 2304  | 0. 59294 | 3. 24407 |
| 0. 59304 | 1. 68375 | 0. 59304 | 2. 23122 | 0. 59304 | 3. 24434 |
| 0. 59313 | 1. 6842  | 0. 59313 | 2. 23186 | 0. 59313 | 3. 24562 |
| 0. 59323 | 1. 68466 | 0. 59322 | 2. 23268 | 0. 59322 | 3. 24661 |
| 0. 59333 | 1. 68456 | 0. 59331 | 2. 23359 | 0. 59331 | 3. 24807 |
| 0. 59341 | 1. 68483 | 0. 59341 | 2. 2344  | 0. 59341 | 3. 24907 |
| 0. 59351 | 1. 68575 | 0. 5935  | 2. 2354  | 0. 5935  | 3. 25025 |
| 0. 5936  | 1. 68629 | 0. 59359 | 2. 23586 | 0. 59359 | 3. 25189 |
| 0. 59369 | 1. 68684 | 0. 59368 | 2. 23686 | 0. 59368 | 3. 2529  |
| 0. 59378 | 1. 68711 | 0. 59377 | 2. 23749 | 0. 59377 | 3. 2538  |
| 0. 59388 | 1. 68765 | 0. 59387 | 2. 23786 | 0. 59387 | 3. 25517 |
| 0. 59397 | 1. 68793 | 0. 59396 | 2. 23868 | 0. 59396 | 3. 25654 |
| 0. 59406 | 1. 6883  | 0. 59405 | 2. 2395  | 0. 59405 | 3. 25753 |
| 0. 59416 | 1. 68875 | 0. 59414 | 2. 24014 | 0. 59415 | 3. 25872 |
| 0. 59425 | 1. 68938 | 0. 59424 | 2. 24068 | 0. 59424 | 3. 25972 |
| 0. 59434 | 1. 69011 | 0. 59433 | 2. 24214 | 0. 59433 | 3. 26045 |
| 0. 59443 | 1. 69038 | 0. 59442 | 2. 24287 | 0. 59442 | 3. 26136 |
| 0. 59453 | 1. 69075 | 0. 59452 | 2. 24378 | 0. 59452 | 3. 26318 |
| 0. 59462 | 1. 69129 | 0. 59461 | 2. 24442 | 0. 59461 | 3. 265   |
| 0. 59471 | 1. 69157 | 0. 5947  | 2. 24514 | 0. 5947  | 3. 26591 |
| 0. 5948  | 1. 69184 | 0. 5948  | 2. 24587 | 0. 5948  | 3. 26736 |
| 0. 59489 | 1. 69239 | 0. 59488 | 2. 24678 | 0. 59488 | 3. 26883 |
| 0. 59499 | 1. 69284 | 0. 59498 | 2. 24751 | 0. 59498 | 3. 26964 |
| 0. 59508 | 1. 6932  | 0. 59507 | 2. 24814 | 0. 59507 | 3. 27128 |
| 0. 59517 | 1. 69376 | 0. 59517 | 2. 24905 | 0. 59517 | 3. 27238 |
| 0. 59527 | 1. 69448 | 0. 59525 | 2. 24969 | 0. 59526 | 3. 27328 |
| 0. 59536 | 1. 69476 | 0. 59535 | 2. 2506  | 0. 59535 | 3. 27474 |

|          |          |          |          |          |          |
|----------|----------|----------|----------|----------|----------|
| 0. 59545 | 1. 69539 | 0. 59544 | 2. 25152 | 0. 59544 | 3. 2761  |
| 0. 59554 | 1. 69603 | 0. 59553 | 2. 25224 | 0. 59553 | 3. 27656 |
| 0. 59564 | 1. 69649 | 0. 59563 | 2. 25287 | 0. 59563 | 3. 27765 |
| 0. 59573 | 1. 69694 | 0. 59572 | 2. 25352 | 0. 59572 | 3. 27874 |
| 0. 59582 | 1. 69757 | 0. 59581 | 2. 25416 | 0. 59581 | 3. 27992 |
| 0. 59592 | 1. 69867 | 0. 5959  | 2. 2547  | 0. 59591 | 3. 28156 |
| 0. 59601 | 1. 69912 | 0. 596   | 2. 25534 | 0. 596   | 3. 28256 |
| 0. 5961  | 1. 6994  | 0. 59609 | 2. 25607 | 0. 59609 | 3. 28384 |
| 0. 59619 | 1. 69967 | 0. 59618 | 2. 25689 | 0. 59618 | 3. 28493 |
| 0. 59628 | 1. 70012 | 0. 59628 | 2. 25752 | 0. 59628 | 3. 28566 |
| 0. 59638 | 1. 70068 | 0. 59637 | 2. 25843 | 0. 59637 | 3. 28621 |
| 0. 59647 | 1. 70122 | 0. 59646 | 2. 25898 | 0. 59646 | 3. 28739 |
| 0. 59656 | 1. 70194 | 0. 59656 | 2. 25989 | 0. 59656 | 3. 28912 |
| 0. 59665 | 1. 7024  | 0. 59664 | 2. 2608  | 0. 59664 | 3. 29022 |
| 0. 59675 | 1. 70267 | 0. 59674 | 2. 26162 | 0. 59674 | 3. 29149 |
| 0. 59684 | 1. 70304 | 0. 59683 | 2. 26225 | 0. 59683 | 3. 29276 |
| 0. 59693 | 1. 70376 | 0. 59692 | 2. 2628  | 0. 59692 | 3. 29377 |
| 0. 59703 | 1. 70431 | 0. 59701 | 2. 2638  | 0. 59702 | 3. 29513 |
| 0. 59712 | 1. 70467 | 0. 59711 | 2. 26462 | 0. 59711 | 3. 29613 |
| 0. 59721 | 1. 70504 | 0. 5972  | 2. 26507 | 0. 5972  | 3. 29749 |
| 0. 5973  | 1. 70531 | 0. 59729 | 2. 26599 | 0. 59729 | 3. 29868 |
| 0. 5974  | 1. 70577 | 0. 59739 | 2. 2668  | 0. 59739 | 3. 30023 |
| 0. 59749 | 1. 70632 | 0. 59748 | 2. 26762 | 0. 59748 | 3. 30132 |
| 0. 59758 | 1. 70705 | 0. 59757 | 2. 26826 | 0. 59757 | 3. 30241 |
| 0. 59768 | 1. 70749 | 0. 59766 | 2. 26917 | 0. 59767 | 3. 3036  |
| 0. 59776 | 1. 70805 | 0. 59776 | 2. 2699  | 0. 59776 | 3. 30432 |
| 0. 59786 | 1. 70832 | 0. 59785 | 2. 27053 | 0. 59785 | 3. 30577 |
| 0. 59795 | 1. 70868 | 0. 59794 | 2. 27144 | 0. 59794 | 3. 30714 |
| 0. 59804 | 1. 70923 | 0. 59804 | 2. 27218 | 0. 59804 | 3. 30815 |
| 0. 59814 | 1. 70941 | 0. 59812 | 2. 27318 | 0. 59813 | 3. 30942 |
| 0. 59823 | 1. 70996 | 0. 59822 | 2. 27391 | 0. 59822 | 3. 31033 |
| 0. 59832 | 1. 71069 | 0. 59832 | 2. 27482 | 0. 59832 | 3. 31151 |
| 0. 59841 | 1. 71104 | 0. 59841 | 2. 27563 | 0. 59841 | 3. 31306 |
| 0. 59851 | 1. 71141 | 0. 5985  | 2. 27636 | 0. 5985  | 3. 31387 |
| 0. 59859 | 1. 71177 | 0. 59859 | 2. 277   | 0. 59859 | 3. 3147  |
| 0. 59869 | 1. 71223 | 0. 59868 | 2. 27772 | 0. 59868 | 3. 31606 |
| 0. 59879 | 1. 71268 | 0. 59877 | 2. 27873 | 0. 59878 | 3. 31707 |
| 0. 59887 | 1. 71324 | 0. 59887 | 2. 27963 | 0. 59887 | 3. 3177  |
| 0. 59897 | 1. 71359 | 0. 59896 | 2. 2801  | 0. 59896 | 3. 31925 |
| 0. 59906 | 1. 71396 | 0. 59905 | 2. 28091 | 0. 59905 | 3. 31989 |
| 0. 59916 | 1. 7145  | 0. 59915 | 2. 28164 | 0. 59915 | 3. 32125 |
| 0. 59925 | 1. 71487 | 0. 59924 | 2. 28246 | 0. 59924 | 3. 32271 |
| 0. 59934 | 1. 71542 | 0. 59933 | 2. 2831  | 0. 59933 | 3. 32361 |
| 0. 59944 | 1. 7156  | 0. 59942 | 2. 28383 | 0. 59943 | 3. 32525 |
| 0. 59952 | 1. 71615 | 0. 59952 | 2. 28473 | 0. 59952 | 3. 32662 |
| 0. 59962 | 1. 71687 | 0. 59961 | 2. 28574 | 0. 59961 | 3. 32807 |
| 0. 59971 | 1. 71733 | 0. 5997  | 2. 28646 | 0. 5997  | 3. 32981 |
| 0. 5998  | 1. 71788 | 0. 59979 | 2. 28701 | 0. 59979 | 3. 33099 |
| 0. 5999  | 1. 71842 | 0. 59988 | 2. 28755 | 0. 59989 | 3. 3319  |
| 0. 59999 | 1. 71887 | 0. 59998 | 2. 28865 | 0. 59998 | 3. 33335 |
| 0. 60008 | 1. 71897 | 0. 60007 | 2. 28938 | 0. 60008 | 3. 33445 |
| 0. 60017 | 1. 71924 | 0. 60016 | 2. 29029 | 0. 60016 | 3. 33563 |
| 0. 60027 | 1. 72006 | 0. 60026 | 2. 2912  | 0. 60026 | 3. 33718 |
| 0. 60035 | 1. 72051 | 0. 60035 | 2. 29192 | 0. 60035 | 3. 33845 |



|         |         |         |         |         |         |
|---------|---------|---------|---------|---------|---------|
| 0.60045 | 1.72097 | 0.60044 | 2.29265 | 0.60044 | 3.33927 |
| 0.60055 | 1.72134 | 0.60053 | 2.29347 | 0.60054 | 3.34028 |
| 0.60063 | 1.72161 | 0.60063 | 2.29438 | 0.60063 | 3.34155 |
| 0.60073 | 1.72215 | 0.60072 | 2.2952  | 0.60072 | 3.34264 |
| 0.60082 | 1.72279 | 0.60081 | 2.29611 | 0.60081 | 3.34383 |
| 0.60092 | 1.72315 | 0.60091 | 2.29639 | 0.60091 | 3.34528 |
| 0.60101 | 1.72388 | 0.601   | 2.29729 | 0.601   | 3.34655 |
| 0.6011  | 1.72433 | 0.60109 | 2.29838 | 0.60109 | 3.34755 |
| 0.60119 | 1.72506 | 0.60118 | 2.29911 | 0.60119 | 3.34883 |
| 0.60128 | 1.72561 | 0.60128 | 2.29984 | 0.60128 | 3.34965 |
| 0.60138 | 1.72607 | 0.60137 | 2.30094 | 0.60137 | 3.35092 |
| 0.60147 | 1.72652 | 0.60146 | 2.30221 | 0.60146 | 3.35238 |
| 0.60156 | 1.72716 | 0.60155 | 2.30266 | 0.60155 | 3.35328 |
| 0.60165 | 1.72761 | 0.60164 | 2.30348 | 0.60165 | 3.35456 |
| 0.60175 | 1.72807 | 0.60174 | 2.30439 | 0.60174 | 3.35547 |
| 0.60184 | 1.72871 | 0.60183 | 2.30503 | 0.60184 | 3.35666 |
| 0.60193 | 1.72925 | 0.60192 | 2.30567 | 0.60192 | 3.35756 |
| 0.60203 | 1.72952 | 0.60202 | 2.30667 | 0.60202 | 3.35875 |
| 0.60211 | 1.73035 | 0.60211 | 2.30795 | 0.60211 | 3.36021 |
| 0.60221 | 1.73071 | 0.6022  | 2.3084  | 0.6022  | 3.36203 |
| 0.6023  | 1.73107 | 0.60229 | 2.30904 | 0.6023  | 3.36302 |
| 0.60239 | 1.73153 | 0.60239 | 2.30995 | 0.60239 | 3.36485 |
| 0.60249 | 1.73189 | 0.60247 | 2.31104 | 0.60248 | 3.3663  |
| 0.60258 | 1.73226 | 0.60257 | 2.31186 | 0.60257 | 3.36776 |
| 0.60267 | 1.73289 | 0.60267 | 2.31222 | 0.60267 | 3.36867 |
| 0.60276 | 1.73353 | 0.60276 | 2.31323 | 0.60276 | 3.36967 |
| 0.60286 | 1.7338  | 0.60285 | 2.31422 | 0.60285 | 3.37068 |
| 0.60295 | 1.73444 | 0.60294 | 2.31468 | 0.60295 | 3.37168 |
| 0.60304 | 1.73498 | 0.60304 | 2.3155  | 0.60304 | 3.37285 |
| 0.60314 | 1.73526 | 0.60313 | 2.31614 | 0.60313 | 3.3745  |
| 0.60323 | 1.7359  | 0.60322 | 2.31668 | 0.60322 | 3.37549 |
| 0.60332 | 1.73635 | 0.60331 | 2.31805 | 0.60331 | 3.3765  |
| 0.60341 | 1.7368  | 0.6034  | 2.31896 | 0.60341 | 3.37813 |
| 0.60351 | 1.73745 | 0.6035  | 2.32023 | 0.6035  | 3.37969 |
| 0.6036  | 1.73799 | 0.60359 | 2.32105 | 0.60359 | 3.38114 |
| 0.60369 | 1.73845 | 0.60368 | 2.32169 | 0.60368 | 3.38296 |
| 0.60378 | 1.73899 | 0.60378 | 2.32214 | 0.60378 | 3.38451 |
| 0.60387 | 1.73944 | 0.60387 | 2.32269 | 0.60387 | 3.3856  |
| 0.60397 | 1.73981 | 0.60396 | 2.3236  | 0.60396 | 3.38669 |
| 0.60407 | 1.74018 | 0.60405 | 2.32451 | 0.60406 | 3.38824 |
| 0.60415 | 1.74063 | 0.60415 | 2.32505 | 0.60415 | 3.38969 |
| 0.60425 | 1.74135 | 0.60423 | 2.32588 | 0.60424 | 3.3906  |
| 0.60434 | 1.74181 | 0.60433 | 2.32687 | 0.60433 | 3.39242 |
| 0.60443 | 1.74226 | 0.60443 | 2.32761 | 0.60443 | 3.39342 |
| 0.60452 | 1.74281 | 0.60452 | 2.32824 | 0.60452 | 3.39416 |
| 0.60462 | 1.74327 | 0.60461 | 2.32906 | 0.60461 | 3.39606 |
| 0.60471 | 1.74409 | 0.6047  | 2.32997 | 0.6047  | 3.39734 |
| 0.6048  | 1.74472 | 0.6048  | 2.33088 | 0.6048  | 3.39916 |
| 0.6049  | 1.74509 | 0.60489 | 2.33161 | 0.60489 | 3.40043 |
| 0.60498 | 1.74555 | 0.60498 | 2.33225 | 0.60498 | 3.40162 |
| 0.60508 | 1.74582 | 0.60507 | 2.33298 | 0.60507 | 3.4039  |
| 0.60517 | 1.74636 | 0.60516 | 2.33434 | 0.60516 | 3.40535 |
| 0.60526 | 1.74709 | 0.60526 | 2.33479 | 0.60526 | 3.40672 |
| 0.60536 | 1.74736 | 0.60535 | 2.33525 | 0.60535 | 3.40845 |

|          |          |          |          |          |          |
|----------|----------|----------|----------|----------|----------|
| 0. 60545 | 1. 74764 | 0. 60544 | 2. 33616 | 0. 60544 | 3. 40899 |
| 0. 60554 | 1. 748   | 0. 60554 | 2. 33716 | 0. 60554 | 3. 4099  |
| 0. 60563 | 1. 74854 | 0. 60563 | 2. 33789 | 0. 60563 | 3. 41118 |
| 0. 60573 | 1. 74882 | 0. 60572 | 2. 33889 | 0. 60572 | 3. 41272 |
| 0. 60583 | 1. 74945 | 0. 60581 | 2. 3398  | 0. 60581 | 3. 41363 |
| 0. 60591 | 1. 7501  | 0. 60591 | 2. 34053 | 0. 6059  | 3. 41518 |
| 0. 60601 | 1. 75064 | 0. 60599 | 2. 34126 | 0. 606   | 3. 41627 |
| 0. 6061  | 1. 75119 | 0. 60609 | 2. 34253 | 0. 60609 | 3. 41736 |
| 0. 60619 | 1. 75137 | 0. 60619 | 2. 34326 | 0. 60619 | 3. 41845 |
| 0. 60628 | 1. 75182 | 0. 60628 | 2. 34408 | 0. 60627 | 3. 41955 |
| 0. 60638 | 1. 75292 | 0. 60637 | 2. 34481 | 0. 60637 | 3. 42083 |
| 0. 60647 | 1. 7531  | 0. 60646 | 2. 34562 | 0. 60646 | 3. 42191 |
| 0. 60656 | 1. 75383 | 0. 60655 | 2. 34627 | 0. 60655 | 3. 42301 |
| 0. 60666 | 1. 75437 | 0. 60665 | 2. 34718 | 0. 60665 | 3. 42446 |
| 0. 60675 | 1. 75492 | 0. 60674 | 2. 34808 | 0. 60674 | 3. 42583 |
| 0. 60684 | 1. 75547 | 0. 60683 | 2. 34881 | 0. 60683 | 3. 4262  |
| 0. 60693 | 1. 75619 | 0. 60692 | 2. 34963 | 0. 60692 | 3. 42738 |
| 0. 60702 | 1. 75655 | 0. 60702 | 2. 35072 | 0. 60702 | 3. 42874 |
| 0. 60712 | 1. 75719 | 0. 60711 | 2. 35127 | 0. 60711 | 3. 42983 |
| 0. 60721 | 1. 75747 | 0. 6072  | 2. 35218 | 0. 6072  | 3. 43075 |
| 0. 6073  | 1. 75792 | 0. 6073  | 2. 35291 | 0. 6073  | 3. 43184 |
| 0. 60739 | 1. 75856 | 0. 60738 | 2. 35336 | 0. 60738 | 3. 43356 |
| 0. 60749 | 1. 7591  | 0. 60748 | 2. 354   | 0. 60748 | 3. 43439 |
| 0. 60758 | 1. 75956 | 0. 60757 | 2. 355   | 0. 60758 | 3. 4362  |
| 0. 60767 | 1. 76011 | 0. 60767 | 2. 3561  | 0. 60767 | 3. 43711 |
| 0. 60777 | 1. 76075 | 0. 60775 | 2. 35673 | 0. 60776 | 3. 43766 |
| 0. 60786 | 1. 7611  | 0. 60785 | 2. 3571  | 0. 60785 | 3. 4393  |
| 0. 60795 | 1. 76156 | 0. 60795 | 2. 35827 | 0. 60795 | 3. 44066 |
| 0. 60804 | 1. 76211 | 0. 60803 | 2. 3591  | 0. 60803 | 3. 44185 |
| 0. 60814 | 1. 76284 | 0. 60813 | 2. 35974 | 0. 60813 | 3. 44321 |
| 0. 60823 | 1. 76347 | 0. 60822 | 2. 36065 | 0. 60822 | 3. 44439 |
| 0. 60832 | 1. 76393 | 0. 60831 | 2. 36146 | 0. 60831 | 3. 4454  |
| 0. 60842 | 1. 7643  | 0. 60841 | 2. 36201 | 0. 60841 | 3. 44631 |
| 0. 60851 | 1. 76438 | 0. 6085  | 2. 36292 | 0. 6085  | 3. 44776 |
| 0. 6086  | 1. 76493 | 0. 60859 | 2. 36383 | 0. 60859 | 3. 44904 |
| 0. 60869 | 1. 76548 | 0. 60868 | 2. 36483 | 0. 60868 | 3. 45022 |
| 0. 60878 | 1. 76575 | 0. 60878 | 2. 36556 | 0. 60878 | 3. 45204 |
| 0. 60888 | 1. 76639 | 0. 60886 | 2. 36619 | 0. 60887 | 3. 45296 |
| 0. 60897 | 1. 7672  | 0. 60896 | 2. 36683 | 0. 60896 | 3. 45423 |
| 0. 60906 | 1. 76785 | 0. 60906 | 2. 36784 | 0. 60906 | 3. 45532 |
| 0. 60915 | 1. 76857 | 0. 60914 | 2. 36865 | 0. 60914 | 3. 45651 |
| 0. 60925 | 1. 76893 | 0. 60924 | 2. 36938 | 0. 60924 | 3. 45814 |
| 0. 60934 | 1. 76948 | 0. 60933 | 2. 37002 | 0. 60934 | 3. 45905 |
| 0. 60943 | 1. 76985 | 0. 60943 | 2. 37102 | 0. 60943 | 3. 45978 |
| 0. 60953 | 1. 77021 | 0. 60951 | 2. 37211 | 0. 60952 | 3. 46106 |
| 0. 60962 | 1. 77048 | 0. 60961 | 2. 37275 | 0. 60961 | 3. 46224 |
| 0. 60971 | 1. 77103 | 0. 60971 | 2. 37347 | 0. 60971 | 3. 46333 |
| 0. 6098  | 1. 77148 | 0. 60979 | 2. 37393 | 0. 60979 | 3. 46424 |
| 0. 60989 | 1. 77221 | 0. 60989 | 2. 37503 | 0. 60989 | 3. 46561 |
| 0. 60999 | 1. 77294 | 0. 60998 | 2. 37576 | 0. 60998 | 3. 46679 |
| 0. 61008 | 1. 77321 | 0. 61007 | 2. 37648 | 0. 61007 | 3. 46806 |
| 0. 61018 | 1. 77385 | 0. 61017 | 2. 37749 | 0. 61017 | 3. 46942 |
| 0. 61026 | 1. 77439 | 0. 61026 | 2. 37803 | 0. 61026 | 3. 47052 |
| 0. 61036 | 1. 77485 | 0. 61035 | 2. 37848 | 0. 61035 | 3. 47152 |

|         |         |         |         |         |         |
|---------|---------|---------|---------|---------|---------|
| 0.61045 | 1.7753  | 0.61044 | 2.37958 | 0.61044 | 3.47352 |
| 0.61054 | 1.77576 | 0.61054 | 2.38049 | 0.61054 | 3.47479 |
| 0.61064 | 1.77631 | 0.61062 | 2.38122 | 0.61063 | 3.47552 |
| 0.61073 | 1.77667 | 0.61072 | 2.38222 | 0.61072 | 3.47717 |
| 0.61082 | 1.77722 | 0.61081 | 2.3834  | 0.61081 | 3.47844 |
| 0.61091 | 1.77777 | 0.6109  | 2.38422 | 0.6109  | 3.47962 |
| 0.61101 | 1.77831 | 0.611   | 2.38504 | 0.611   | 3.48117 |
| 0.6111  | 1.77867 | 0.61109 | 2.38603 | 0.6111  | 3.48198 |
| 0.61119 | 1.77904 | 0.61119 | 2.38668 | 0.61118 | 3.48299 |
| 0.61129 | 1.7795  | 0.61127 | 2.38749 | 0.61128 | 3.48499 |
| 0.61138 | 1.77968 | 0.61137 | 2.38831 | 0.61137 | 3.48599 |
| 0.61147 | 1.78058 | 0.61146 | 2.38913 | 0.61146 | 3.48717 |
| 0.61156 | 1.78122 | 0.61155 | 2.38986 | 0.61155 | 3.48882 |
| 0.61165 | 1.78177 | 0.61165 | 2.39095 | 0.61165 | 3.49009 |
| 0.61174 | 1.78204 | 0.61174 | 2.39159 | 0.61174 | 3.49118 |
| 0.61184 | 1.78268 | 0.61183 | 2.39259 | 0.61183 | 3.49264 |
| 0.61194 | 1.78313 | 0.61193 | 2.39377 | 0.61193 | 3.49382 |
| 0.61202 | 1.78368 | 0.61202 | 2.39459 | 0.61202 | 3.49482 |
| 0.61212 | 1.78413 | 0.61211 | 2.3956  | 0.61211 | 3.49618 |
| 0.61221 | 1.78477 | 0.6122  | 2.39633 | 0.6122  | 3.49774 |
| 0.6123  | 1.78514 | 0.61229 | 2.39723 | 0.61229 | 3.49901 |
| 0.6124  | 1.78595 | 0.61238 | 2.39805 | 0.61239 | 3.50038 |
| 0.61249 | 1.78641 | 0.61248 | 2.39887 | 0.61248 | 3.50119 |
| 0.61258 | 1.78705 | 0.61257 | 2.39969 | 0.61257 | 3.50283 |
| 0.61267 | 1.78768 | 0.61266 | 2.40051 | 0.61266 | 3.50383 |
| 0.61277 | 1.78805 | 0.61276 | 2.4017  | 0.61276 | 3.50456 |
| 0.61286 | 1.78859 | 0.61285 | 2.40233 | 0.61285 | 3.50556 |
| 0.61295 | 1.78942 | 0.61294 | 2.40297 | 0.61294 | 3.50701 |
| 0.61305 | 1.79015 | 0.61303 | 2.40352 | 0.61304 | 3.50838 |
| 0.61313 | 1.7906  | 0.61313 | 2.4047  | 0.61313 | 3.50993 |
| 0.61323 | 1.79087 | 0.61322 | 2.40561 | 0.61322 | 3.51102 |
| 0.61332 | 1.79141 | 0.61331 | 2.40652 | 0.61331 | 3.5122  |
| 0.61342 | 1.79178 | 0.61341 | 2.40716 | 0.61341 | 3.51375 |
| 0.6135  | 1.79223 | 0.6135  | 2.40825 | 0.61349 | 3.51539 |
| 0.6136  | 1.79269 | 0.61359 | 2.40898 | 0.61359 | 3.51675 |
| 0.61369 | 1.79297 | 0.61368 | 2.40979 | 0.61369 | 3.51812 |
| 0.61378 | 1.79342 | 0.61378 | 2.41089 | 0.61378 | 3.51922 |
| 0.61388 | 1.79405 | 0.61387 | 2.41171 | 0.61387 | 3.52058 |
| 0.61397 | 1.79405 | 0.61396 | 2.41252 | 0.61396 | 3.52186 |
| 0.61406 | 1.79488 | 0.61405 | 2.41307 | 0.61405 | 3.52285 |
| 0.61416 | 1.79569 | 0.61414 | 2.41435 | 0.61415 | 3.52385 |
| 0.61425 | 1.79615 | 0.61424 | 2.41553 | 0.61424 | 3.5255  |
| 0.61434 | 1.7966  | 0.61433 | 2.41653 | 0.61434 | 3.52731 |
| 0.61443 | 1.79734 | 0.61442 | 2.41726 | 0.61442 | 3.52814 |
| 0.61453 | 1.79779 | 0.61452 | 2.41807 | 0.61452 | 3.52932 |
| 0.61462 | 1.79806 | 0.61461 | 2.4189  | 0.61461 | 3.53104 |
| 0.61471 | 1.79861 | 0.6147  | 2.41989 | 0.6147  | 3.53205 |
| 0.6148  | 1.79906 | 0.61479 | 2.4208  | 0.6148  | 3.53332 |
| 0.61489 | 1.79943 | 0.61489 | 2.4218  | 0.61489 | 3.53487 |
| 0.61499 | 1.79997 | 0.61498 | 2.42253 | 0.61498 | 3.53569 |
| 0.61508 | 1.80043 | 0.61507 | 2.42335 | 0.61507 | 3.53696 |
| 0.61517 | 1.80097 | 0.61517 | 2.424   | 0.61517 | 3.53823 |
| 0.61526 | 1.80143 | 0.61525 | 2.42491 | 0.61525 | 3.53924 |
| 0.61536 | 1.80198 | 0.61535 | 2.42554 | 0.61535 | 3.54042 |

|         |         |         |         |         |         |
|---------|---------|---------|---------|---------|---------|
| 0.61545 | 1.80252 | 0.61544 | 2.42645 | 0.61545 | 3.54188 |
| 0.61554 | 1.80288 | 0.61553 | 2.42745 | 0.61553 | 3.54288 |
| 0.61564 | 1.80325 | 0.61563 | 2.42846 | 0.61563 | 3.54425 |
| 0.61573 | 1.80352 | 0.61572 | 2.42918 | 0.61572 | 3.54561 |
| 0.61582 | 1.80434 | 0.61581 | 2.43009 | 0.61581 | 3.54689 |
| 0.61592 | 1.80498 | 0.6159  | 2.43063 | 0.61591 | 3.54825 |
| 0.61601 | 1.80562 | 0.616   | 2.43155 | 0.616   | 3.55016 |
| 0.6161  | 1.80589 | 0.61609 | 2.43255 | 0.61609 | 3.55107 |
| 0.61619 | 1.80598 | 0.61618 | 2.43337 | 0.61618 | 3.55144 |
| 0.61629 | 1.80671 | 0.61628 | 2.43428 | 0.61628 | 3.5528  |
| 0.61637 | 1.80771 | 0.61637 | 2.43537 | 0.61637 | 3.55444 |
| 0.61647 | 1.80807 | 0.61646 | 2.43619 | 0.61646 | 3.55608 |
| 0.61656 | 1.80871 | 0.61655 | 2.43683 | 0.61656 | 3.55717 |
| 0.61665 | 1.80944 | 0.61665 | 2.43801 | 0.61665 | 3.55808 |
| 0.61675 | 1.80971 | 0.61673 | 2.43874 | 0.61674 | 3.55926 |
| 0.61684 | 1.81008 | 0.61683 | 2.43956 | 0.61683 | 3.56135 |
| 0.61693 | 1.81071 | 0.61693 | 2.44046 | 0.61693 | 3.56254 |
| 0.61702 | 1.81108 | 0.61702 | 2.44074 | 0.61702 | 3.56345 |
| 0.61712 | 1.81144 | 0.61711 | 2.44201 | 0.61711 | 3.56481 |
| 0.61721 | 1.81199 | 0.6172  | 2.44301 | 0.6172  | 3.5659  |
| 0.6173  | 1.81262 | 0.61729 | 2.44374 | 0.61729 | 3.56745 |
| 0.6174  | 1.81299 | 0.61738 | 2.44475 | 0.61739 | 3.56919 |
| 0.61748 | 1.81353 | 0.61748 | 2.44511 | 0.61748 | 3.57046 |
| 0.61758 | 1.81426 | 0.61757 | 2.44583 | 0.61757 | 3.57191 |
| 0.61768 | 1.81471 | 0.61766 | 2.44648 | 0.61766 | 3.57355 |
| 0.61777 | 1.81527 | 0.61776 | 2.44739 | 0.61776 | 3.57428 |
| 0.61786 | 1.81608 | 0.61785 | 2.44811 | 0.61785 | 3.57556 |
| 0.61795 | 1.81635 | 0.61794 | 2.44893 | 0.61794 | 3.57719 |
| 0.61805 | 1.81681 | 0.61804 | 2.44938 | 0.61804 | 3.5782  |
| 0.61813 | 1.81735 | 0.61813 | 2.45011 | 0.61813 | 3.57947 |
| 0.61823 | 1.81808 | 0.61822 | 2.45148 | 0.61822 | 3.58065 |
| 0.61832 | 1.81881 | 0.61831 | 2.45221 | 0.61831 | 3.58184 |
| 0.61841 | 1.81918 | 0.61841 | 2.45267 | 0.6184  | 3.58302 |
| 0.61851 | 1.81982 | 0.61849 | 2.45349 | 0.6185  | 3.58466 |
| 0.6186  | 1.82009 | 0.61859 | 2.45458 | 0.61859 | 3.58602 |
| 0.61869 | 1.82081 | 0.61869 | 2.45539 | 0.61869 | 3.5872  |
| 0.61878 | 1.82127 | 0.61878 | 2.45631 | 0.61877 | 3.58875 |
| 0.61888 | 1.82191 | 0.61887 | 2.45703 | 0.61887 | 3.59057 |
| 0.61897 | 1.82236 | 0.61896 | 2.45758 | 0.61896 | 3.59184 |
| 0.61906 | 1.82254 | 0.61905 | 2.45849 | 0.61905 | 3.5933  |
| 0.61916 | 1.82309 | 0.61915 | 2.45922 | 0.61915 | 3.59439 |
| 0.61924 | 1.82382 | 0.61924 | 2.46012 | 0.61924 | 3.59567 |
| 0.61934 | 1.82445 | 0.61933 | 2.46095 | 0.61933 | 3.59686 |
| 0.61944 | 1.82501 | 0.61942 | 2.46231 | 0.61942 | 3.59813 |
| 0.61953 | 1.82573 | 0.61952 | 2.46304 | 0.61952 | 3.59949 |
| 0.61962 | 1.82601 | 0.61961 | 2.46413 | 0.61961 | 3.60104 |
| 0.61971 | 1.82664 | 0.6197  | 2.46486 | 0.6197  | 3.60204 |
| 0.6198  | 1.82737 | 0.6198  | 2.46568 | 0.6198  | 3.60322 |
| 0.61989 | 1.82819 | 0.61989 | 2.4665  | 0.61989 | 3.60459 |
| 0.61999 | 1.82864 | 0.61998 | 2.46759 | 0.61998 | 3.60659 |
| 0.62008 | 1.8291  | 0.62007 | 2.46823 | 0.62007 | 3.60805 |
| 0.62017 | 1.83001 | 0.62016 | 2.46923 | 0.62016 | 3.60914 |
| 0.62027 | 1.83055 | 0.62026 | 2.47014 | 0.62026 | 3.6105  |
| 0.62036 | 1.83101 | 0.62035 | 2.47114 | 0.62035 | 3.61196 |

|         |         |         |         |         |         |
|---------|---------|---------|---------|---------|---------|
| 0.62045 | 1.83147 | 0.62045 | 2.47177 | 0.62045 | 3.61333 |
| 0.62054 | 1.83238 | 0.62053 | 2.47259 | 0.62053 | 3.61479 |
| 0.62064 | 1.83311 | 0.62063 | 2.47387 | 0.62063 | 3.61624 |
| 0.62073 | 1.83374 | 0.62072 | 2.4746  | 0.62072 | 3.6176  |
| 0.62082 | 1.83456 | 0.62081 | 2.47551 | 0.62081 | 3.6187  |
| 0.62091 | 1.8351  | 0.6209  | 2.47651 | 0.62091 | 3.61997 |
| 0.621   | 1.83593 | 0.621   | 2.47733 | 0.621   | 3.62134 |
| 0.6211  | 1.83638 | 0.62109 | 2.47797 | 0.62109 | 3.62215 |
| 0.62119 | 1.83693 | 0.62118 | 2.47861 | 0.62118 | 3.62361 |
| 0.62128 | 1.83747 | 0.62128 | 2.47952 | 0.62128 | 3.62525 |
| 0.62138 | 1.83811 | 0.62137 | 2.48033 | 0.62137 | 3.62662 |
| 0.62147 | 1.83874 | 0.62146 | 2.48106 | 0.62146 | 3.62807 |
| 0.62156 | 1.8393  | 0.62156 | 2.48206 | 0.62156 | 3.62962 |
| 0.62165 | 1.83965 | 0.62165 | 2.48361 | 0.62165 | 3.6308  |
| 0.62175 | 1.84021 | 0.62174 | 2.48452 | 0.62174 | 3.63217 |
| 0.62184 | 1.84065 | 0.62183 | 2.48534 | 0.62183 | 3.63363 |
| 0.62193 | 1.8413  | 0.62192 | 2.48616 | 0.62192 | 3.63481 |
| 0.62203 | 1.84184 | 0.62202 | 2.48707 | 0.62202 | 3.63644 |
| 0.62212 | 1.84248 | 0.62211 | 2.48789 | 0.62211 | 3.63763 |
| 0.62221 | 1.8433  | 0.62221 | 2.48907 | 0.62221 | 3.63881 |
| 0.6223  | 1.84366 | 0.62229 | 2.48971 | 0.62229 | 3.63991 |
| 0.62239 | 1.84448 | 0.62239 | 2.49035 | 0.62239 | 3.64163 |
| 0.62249 | 1.84503 | 0.62248 | 2.49153 | 0.62248 | 3.64346 |
| 0.62258 | 1.84548 | 0.62257 | 2.49216 | 0.62257 | 3.64446 |
| 0.62268 | 1.84612 | 0.62267 | 2.49289 | 0.62267 | 3.64545 |
| 0.62276 | 1.84648 | 0.62276 | 2.4939  | 0.62276 | 3.64655 |
| 0.62286 | 1.84703 | 0.62285 | 2.49462 | 0.62285 | 3.64783 |
| 0.62295 | 1.84766 | 0.62294 | 2.49563 | 0.62294 | 3.64928 |
| 0.62304 | 1.84794 | 0.62304 | 2.4968  | 0.62304 | 3.65055 |
| 0.62314 | 1.84876 | 0.62313 | 2.49735 | 0.62313 | 3.65182 |
| 0.62323 | 1.84931 | 0.62322 | 2.49863 | 0.62322 | 3.65319 |
| 0.62332 | 1.84967 | 0.62332 | 2.49981 | 0.62332 | 3.65429 |
| 0.62341 | 1.84994 | 0.62341 | 2.50017 | 0.62341 | 3.65556 |
| 0.62351 | 1.85067 | 0.6235  | 2.50081 | 0.6235  | 3.65702 |
| 0.6236  | 1.85122 | 0.62359 | 2.50182 | 0.62359 | 3.65811 |
| 0.62369 | 1.85186 | 0.62369 | 2.50254 | 0.62368 | 3.6592  |
| 0.62379 | 1.85231 | 0.62377 | 2.50364 | 0.62378 | 3.66047 |
| 0.62387 | 1.85294 | 0.62387 | 2.50464 | 0.62387 | 3.66193 |
| 0.62397 | 1.85294 | 0.62396 | 2.50546 | 0.62396 | 3.66348 |
| 0.62406 | 1.85331 | 0.62405 | 2.50618 | 0.62405 | 3.66493 |
| 0.62415 | 1.85359 | 0.62415 | 2.50709 | 0.62415 | 3.66667 |
| 0.62425 | 1.85404 | 0.62424 | 2.5081  | 0.62424 | 3.66785 |
| 0.62434 | 1.85431 | 0.62433 | 2.50882 | 0.62433 | 3.66939 |
| 0.62444 | 1.85477 | 0.62442 | 2.51    | 0.62443 | 3.67085 |
| 0.62452 | 1.85531 | 0.62452 | 2.51073 | 0.62452 | 3.67203 |
| 0.62462 | 1.85595 | 0.62461 | 2.51182 | 0.62461 | 3.67358 |
| 0.62471 | 1.85659 | 0.6247  | 2.51292 | 0.6247  | 3.67531 |
| 0.6248  | 1.85704 | 0.6248  | 2.51319 | 0.6248  | 3.6764  |
| 0.6249  | 1.8574  | 0.62489 | 2.51401 | 0.62489 | 3.67768 |
| 0.62499 | 1.85804 | 0.62498 | 2.51547 | 0.62498 | 3.67932 |
| 0.62508 | 1.85877 | 0.62507 | 2.5161  | 0.62507 | 3.68113 |
| 0.62517 | 1.85932 | 0.62516 | 2.51719 | 0.62516 | 3.68259 |
| 0.62527 | 1.85986 | 0.62526 | 2.51819 | 0.62526 | 3.68377 |
| 0.62536 | 1.86022 | 0.62535 | 2.51902 | 0.62535 | 3.68532 |

|          |          |          |          |          |          |
|----------|----------|----------|----------|----------|----------|
| 0. 62545 | 1. 86087 | 0. 62544 | 2. 51975 | 0. 62544 | 3. 68687 |
| 0. 62555 | 1. 86159 | 0. 62553 | 2. 52102 | 0. 62554 | 3. 68796 |
| 0. 62563 | 1. 86195 | 0. 62563 | 2. 52174 | 0. 62563 | 3. 68942 |
| 0. 62573 | 1. 86259 | 0. 62572 | 2. 52256 | 0. 62572 | 3. 6907  |
| 0. 62582 | 1. 86296 | 0. 62581 | 2. 52375 | 0. 62581 | 3. 69142 |
| 0. 62591 | 1. 86341 | 0. 62591 | 2. 52448 | 0. 62591 | 3. 69252 |
| 0. 62601 | 1. 86414 | 0. 626   | 2. 52512 | 0. 626   | 3. 6946  |
| 0. 6261  | 1. 86469 | 0. 62609 | 2. 5263  | 0. 62609 | 3. 69616 |
| 0. 62619 | 1. 86532 | 0. 62618 | 2. 52702 | 0. 62619 | 3. 69733 |
| 0. 62628 | 1. 86587 | 0. 62628 | 2. 52802 | 0. 62628 | 3. 69889 |
| 0. 62638 | 1. 8666  | 0. 62637 | 2. 52893 | 0. 62637 | 3. 70034 |
| 0. 62647 | 1. 86678 | 0. 62646 | 2. 52966 | 0. 62646 | 3. 70162 |
| 0. 62656 | 1. 86733 | 0. 62656 | 2. 53058 | 0. 62656 | 3. 70298 |
| 0. 62666 | 1. 8676  | 0. 62664 | 2. 53157 | 0. 62665 | 3. 70498 |
| 0. 62675 | 1. 86814 | 0. 62674 | 2. 53267 | 0. 62674 | 3. 70607 |
| 0. 62684 | 1. 86869 | 0. 62683 | 2. 53331 | 0. 62683 | 3. 70753 |
| 0. 62693 | 1. 86915 | 0. 62692 | 2. 5344  | 0. 62692 | 3. 70935 |
| 0. 62703 | 1. 86951 | 0. 62702 | 2. 53522 | 0. 62702 | 3. 71099 |
| 0. 62712 | 1. 86996 | 0. 62711 | 2. 53576 | 0. 62711 | 3. 71226 |
| 0. 62721 | 1. 87069 | 0. 6272  | 2. 5374  | 0. 6272  | 3. 71345 |
| 0. 6273  | 1. 87124 | 0. 62729 | 2. 53813 | 0. 6273  | 3. 715   |
| 0. 62739 | 1. 87179 | 0. 62739 | 2. 53913 | 0. 62739 | 3. 71654 |
| 0. 62749 | 1. 87233 | 0. 62747 | 2. 53958 | 0. 62748 | 3. 7179  |
| 0. 62758 | 1. 8726  | 0. 62757 | 2. 54059 | 0. 62757 | 3. 71927 |
| 0. 62767 | 1. 87352 | 0. 62767 | 2. 5414  | 0. 62767 | 3. 72045 |
| 0. 62777 | 1. 87415 | 0. 62775 | 2. 54195 | 0. 62776 | 3. 722   |
| 0. 62786 | 1. 87461 | 0. 62785 | 2. 54323 | 0. 62785 | 3. 72328 |
| 0. 62795 | 1. 87542 | 0. 62794 | 2. 54422 | 0. 62795 | 3. 72519 |
| 0. 62804 | 1. 87624 | 0. 62804 | 2. 54523 | 0. 62804 | 3. 72656 |
| 0. 62814 | 1. 8767  | 0. 62813 | 2. 54686 | 0. 62813 | 3. 72783 |
| 0. 62823 | 1. 87715 | 0. 62822 | 2. 54823 | 0. 62822 | 3. 72955 |
| 0. 62832 | 1. 87779 | 0. 62832 | 2. 54896 | 0. 62832 | 3. 73065 |
| 0. 62842 | 1. 87825 | 0. 6284  | 2. 54942 | 0. 62841 | 3. 73193 |
| 0. 6285  | 1. 87879 | 0. 6285  | 2. 54996 | 0. 6285  | 3. 73365 |
| 0. 6286  | 1. 87943 | 0. 62859 | 2. 55133 | 0. 62859 | 3. 73493 |
| 0. 62869 | 1. 87979 | 0. 62868 | 2. 55242 | 0. 62868 | 3. 73538 |
| 0. 62879 | 1. 88052 | 0. 62878 | 2. 55297 | 0. 62878 | 3. 73711 |
| 0. 62887 | 1. 88107 | 0. 62887 | 2. 5536  | 0. 62887 | 3. 7383  |
| 0. 62897 | 1. 88153 | 0. 62896 | 2. 55405 | 0. 62896 | 3. 73948 |
| 0. 62906 | 1. 88244 | 0. 62905 | 2. 55542 | 0. 62906 | 3. 74094 |
| 0. 62915 | 1. 8828  | 0. 62915 | 2. 55661 | 0. 62915 | 3. 74267 |
| 0. 62925 | 1. 88307 | 0. 62923 | 2. 55743 | 0. 62924 | 3. 74403 |
| 0. 62934 | 1. 88371 | 0. 62933 | 2. 55806 | 0. 62933 | 3. 74557 |
| 0. 62943 | 1. 88453 | 0. 62943 | 2. 55915 | 0. 62943 | 3. 74658 |
| 0. 62953 | 1. 88489 | 0. 62951 | 2. 56034 | 0. 62952 | 3. 74821 |
| 0. 62962 | 1. 88516 | 0. 62961 | 2. 56134 | 0. 62961 | 3. 75004 |
| 0. 62971 | 1. 8858  | 0. 6297  | 2. 56243 | 0. 62971 | 3. 75177 |
| 0. 6298  | 1. 88635 | 0. 6298  | 2. 56361 | 0. 6298  | 3. 75295 |
| 0. 6299  | 1. 88672 | 0. 62989 | 2. 5648  | 0. 62989 | 3. 75404 |
| 0. 62999 | 1. 88762 | 0. 62998 | 2. 56561 | 0. 62998 | 3. 7555  |
| 0. 63008 | 1. 88807 | 0. 63007 | 2. 56662 | 0. 63007 | 3. 75677 |
| 0. 63018 | 1. 88826 | 0. 63016 | 2. 5678  | 0. 63017 | 3. 7585  |
| 0. 63026 | 1. 88872 | 0. 63026 | 2. 5688  | 0. 63026 | 3. 76023 |
| 0. 63036 | 1. 88917 | 0. 63035 | 2. 56962 | 0. 63035 | 3. 76151 |

|         |         |         |         |         |         |
|---------|---------|---------|---------|---------|---------|
| 0.63045 | 1.88971 | 0.63044 | 2.57071 | 0.63044 | 3.76333 |
| 0.63054 | 1.89044 | 0.63054 | 2.57189 | 0.63054 | 3.76478 |
| 0.63063 | 1.89117 | 0.63063 | 2.57254 | 0.63063 | 3.76597 |
| 0.63073 | 1.89172 | 0.63072 | 2.57372 | 0.63072 | 3.76696 |
| 0.63082 | 1.89245 | 0.63081 | 2.57472 | 0.63082 | 3.76924 |
| 0.63091 | 1.89272 | 0.63091 | 2.57572 | 0.6309  | 3.77061 |
| 0.63101 | 1.89318 | 0.63099 | 2.57709 | 0.631   | 3.77188 |
| 0.6311  | 1.89372 | 0.63109 | 2.57745 | 0.63109 | 3.77307 |
| 0.63119 | 1.89418 | 0.63118 | 2.57854 | 0.63118 | 3.77434 |
| 0.63128 | 1.89463 | 0.63127 | 2.57955 | 0.63127 | 3.77561 |
| 0.63138 | 1.89509 | 0.63137 | 2.58054 | 0.63137 | 3.77734 |
| 0.63147 | 1.89545 | 0.63146 | 2.58163 | 0.63147 | 3.77788 |
| 0.63156 | 1.896   | 0.63155 | 2.58273 | 0.63155 | 3.77998 |
| 0.63166 | 1.89673 | 0.63165 | 2.58364 | 0.63165 | 3.78134 |
| 0.63174 | 1.89727 | 0.63174 | 2.58446 | 0.63174 | 3.78253 |
| 0.63184 | 1.89809 | 0.63183 | 2.58491 | 0.63183 | 3.78408 |
| 0.63194 | 1.89873 | 0.63192 | 2.58582 | 0.63192 | 3.78571 |
| 0.63203 | 1.89918 | 0.63202 | 2.587   | 0.63202 | 3.78663 |
| 0.63212 | 1.89991 | 0.63211 | 2.58782 | 0.63211 | 3.78835 |
| 0.63221 | 1.90073 | 0.6322  | 2.58856 | 0.6322  | 3.78972 |
| 0.6323  | 1.90146 | 0.6323  | 2.5891  | 0.6323  | 3.7909  |
| 0.63239 | 1.90192 | 0.63239 | 2.59037 | 0.63239 | 3.79254 |
| 0.63249 | 1.90228 | 0.63248 | 2.59183 | 0.63248 | 3.794   |
| 0.63258 | 1.90273 | 0.63257 | 2.59274 | 0.63257 | 3.79564 |
| 0.63267 | 1.90328 | 0.63266 | 2.59356 | 0.63266 | 3.7971  |
| 0.63277 | 1.90373 | 0.63276 | 2.59438 | 0.63276 | 3.79873 |
| 0.63286 | 1.9041  | 0.63285 | 2.59529 | 0.63285 | 3.80009 |
| 0.63295 | 1.90483 | 0.63295 | 2.59657 | 0.63295 | 3.80146 |
| 0.63304 | 1.90537 | 0.63303 | 2.5972  | 0.63303 | 3.80347 |
| 0.63314 | 1.90583 | 0.63313 | 2.59839 | 0.63313 | 3.80446 |
| 0.63323 | 1.90628 | 0.63322 | 2.5993  | 0.63323 | 3.80583 |
| 0.63332 | 1.90683 | 0.63331 | 2.60038 | 0.63331 | 3.8071  |
| 0.63341 | 1.90719 | 0.63341 | 2.60102 | 0.63341 | 3.80847 |
| 0.6335  | 1.90811 | 0.6335  | 2.60184 | 0.6335  | 3.81011 |
| 0.6336  | 1.90883 | 0.63359 | 2.60302 | 0.63359 | 3.8112  |
| 0.6337  | 1.90947 | 0.63368 | 2.60366 | 0.63368 | 3.81257 |
| 0.63378 | 1.90992 | 0.63378 | 2.60457 | 0.63378 | 3.8142  |
| 0.63388 | 1.91065 | 0.63386 | 2.60557 | 0.63387 | 3.81575 |
| 0.63397 | 1.9111  | 0.63396 | 2.60621 | 0.63396 | 3.81703 |
| 0.63406 | 1.91165 | 0.63406 | 2.60721 | 0.63406 | 3.81848 |
| 0.63415 | 1.9121  | 0.63414 | 2.60876 | 0.63414 | 3.82021 |
| 0.63425 | 1.91229 | 0.63424 | 2.60949 | 0.63424 | 3.82139 |
| 0.63434 | 1.91329 | 0.63433 | 2.6104  | 0.63434 | 3.82267 |
| 0.63443 | 1.91393 | 0.63442 | 2.6114  | 0.63442 | 3.82367 |
| 0.63453 | 1.91465 | 0.63451 | 2.61186 | 0.63452 | 3.82504 |
| 0.63462 | 1.91502 | 0.63461 | 2.61322 | 0.63461 | 3.82649 |
| 0.63471 | 1.91565 | 0.63471 | 2.61422 | 0.63471 | 3.82822 |
| 0.6348  | 1.91621 | 0.63479 | 2.61486 | 0.63479 | 3.82895 |
| 0.6349  | 1.91684 | 0.63489 | 2.61567 | 0.63489 | 3.83059 |
| 0.63499 | 1.91747 | 0.63498 | 2.61659 | 0.63498 | 3.83196 |
| 0.63508 | 1.91802 | 0.63507 | 2.61758 | 0.63507 | 3.83332 |
| 0.63517 | 1.91885 | 0.63517 | 2.61868 | 0.63517 | 3.83532 |
| 0.63526 | 1.91939 | 0.63526 | 2.61996 | 0.63526 | 3.83668 |
| 0.63536 | 1.91976 | 0.63535 | 2.62069 | 0.63535 | 3.83842 |

|         |         |         |         |         |         |
|---------|---------|---------|---------|---------|---------|
| 0.63545 | 1.92002 | 0.63544 | 2.62177 | 0.63544 | 3.83941 |
| 0.63554 | 1.92039 | 0.63554 | 2.62296 | 0.63554 | 3.84123 |
| 0.63564 | 1.92103 | 0.63563 | 2.62378 | 0.63563 | 3.84315 |
| 0.63573 | 1.92167 | 0.63572 | 2.62469 | 0.63572 | 3.84415 |
| 0.63582 | 1.9223  | 0.63582 | 2.62578 | 0.63581 | 3.84615 |
| 0.63591 | 1.92303 | 0.6359  | 2.62651 | 0.6359  | 3.84715 |
| 0.63601 | 1.9234  | 0.636   | 2.62769 | 0.636   | 3.8487  |
| 0.6361  | 1.92394 | 0.63609 | 2.62897 | 0.63609 | 3.85016 |
| 0.63619 | 1.92457 | 0.63618 | 2.62997 | 0.63618 | 3.8517  |
| 0.63629 | 1.92549 | 0.63627 | 2.6307  | 0.63628 | 3.85262 |
| 0.63638 | 1.9264  | 0.63637 | 2.6316  | 0.63637 | 3.85453 |
| 0.63647 | 1.92667 | 0.63646 | 2.63242 | 0.63646 | 3.85526 |
| 0.63656 | 1.92721 | 0.63655 | 2.63342 | 0.63655 | 3.85671 |
| 0.63666 | 1.92786 | 0.63665 | 2.63452 | 0.63665 | 3.85799 |
| 0.63675 | 1.92831 | 0.63674 | 2.63533 | 0.63674 | 3.85908 |
| 0.63684 | 1.92877 | 0.63683 | 2.63615 | 0.63683 | 3.8608  |
| 0.63693 | 1.92958 | 0.63693 | 2.63734 | 0.63693 | 3.86253 |
| 0.63702 | 1.9305  | 0.63702 | 2.63807 | 0.63702 | 3.86363 |
| 0.63712 | 1.93077 | 0.63711 | 2.63889 | 0.63711 | 3.8649  |
| 0.63721 | 1.93149 | 0.6372  | 2.64034 | 0.6372  | 3.86636 |
| 0.6373  | 1.93213 | 0.6373  | 2.64116 | 0.6373  | 3.86754 |
| 0.6374  | 1.93259 | 0.63739 | 2.64226 | 0.63739 | 3.86891 |
| 0.63749 | 1.93323 | 0.63748 | 2.64334 | 0.63748 | 3.87018 |
| 0.63758 | 1.93413 | 0.63757 | 2.64407 | 0.63757 | 3.87172 |
| 0.63767 | 1.93477 | 0.63766 | 2.64481 | 0.63766 | 3.87337 |
| 0.63777 | 1.93531 | 0.63776 | 2.64571 | 0.63776 | 3.87528 |
| 0.63786 | 1.93577 | 0.63785 | 2.64653 | 0.63785 | 3.8761  |
| 0.63795 | 1.93632 | 0.63794 | 2.64744 | 0.63794 | 3.87755 |
| 0.63805 | 1.93686 | 0.63803 | 2.64836 | 0.63804 | 3.8791  |
| 0.63814 | 1.93732 | 0.63813 | 2.64936 | 0.63813 | 3.8811  |
| 0.63823 | 1.93759 | 0.63822 | 2.65054 | 0.63822 | 3.8821  |
| 0.63832 | 1.93805 | 0.63831 | 2.65199 | 0.63831 | 3.88374 |
| 0.63842 | 1.93869 | 0.63841 | 2.65318 | 0.63841 | 3.88538 |
| 0.6385  | 1.93896 | 0.6385  | 2.65436 | 0.6385  | 3.88648 |
| 0.6386  | 1.94005 | 0.63859 | 2.65554 | 0.63859 | 3.88802 |
| 0.63869 | 1.94069 | 0.63869 | 2.65618 | 0.63869 | 3.88956 |
| 0.63878 | 1.94105 | 0.63877 | 2.65709 | 0.63877 | 3.8912  |
| 0.63888 | 1.94178 | 0.63887 | 2.65837 | 0.63887 | 3.89212 |
| 0.63897 | 1.94223 | 0.63896 | 2.65946 | 0.63896 | 3.89321 |
| 0.63906 | 1.94306 | 0.63906 | 2.66073 | 0.63906 | 3.89467 |
| 0.63916 | 1.94378 | 0.63914 | 2.66182 | 0.63915 | 3.89649 |
| 0.63925 | 1.94442 | 0.63924 | 2.66228 | 0.63924 | 3.89794 |
| 0.63934 | 1.94488 | 0.63933 | 2.66319 | 0.63933 | 3.89958 |
| 0.63943 | 1.94524 | 0.63942 | 2.6641  | 0.63942 | 3.90094 |
| 0.63953 | 1.94596 | 0.63952 | 2.66519 | 0.63952 | 3.90203 |
| 0.63962 | 1.94633 | 0.63961 | 2.66583 | 0.63961 | 3.90404 |
| 0.63971 | 1.94669 | 0.6397  | 2.6671  | 0.6397  | 3.9055  |
| 0.63981 | 1.94724 | 0.63979 | 2.66801 | 0.6398  | 3.90695 |
| 0.63989 | 1.94797 | 0.63989 | 2.66892 | 0.63989 | 3.90868 |
| 0.63999 | 1.9487  | 0.63998 | 2.66974 | 0.63998 | 3.90995 |
| 0.64008 | 1.94924 | 0.64007 | 2.67056 | 0.64007 | 3.91114 |
| 0.64017 | 1.94997 | 0.64017 | 2.67147 | 0.64017 | 3.91242 |
| 0.64027 | 1.95088 | 0.64026 | 2.67229 | 0.64026 | 3.91432 |
| 0.64036 | 1.9517  | 0.64035 | 2.67284 | 0.64035 | 3.91533 |



|         |         |         |         |         |         |
|---------|---------|---------|---------|---------|---------|
| 0.64045 | 1.95234 | 0.64044 | 2.67384 | 0.64045 | 3.91769 |
| 0.64054 | 1.9527  | 0.64053 | 2.67465 | 0.64053 | 3.91915 |
| 0.64064 | 1.95288 | 0.64063 | 2.67575 | 0.64063 | 3.9207  |
| 0.64073 | 1.95343 | 0.64072 | 2.67693 | 0.64072 | 3.92261 |
| 0.64082 | 1.95389 | 0.64082 | 2.67784 | 0.64082 | 3.92461 |
| 0.64092 | 1.95452 | 0.6409  | 2.67884 | 0.64091 | 3.92552 |
| 0.641   | 1.95498 | 0.641   | 2.67975 | 0.641   | 3.92716 |
| 0.6411  | 1.95562 | 0.64109 | 2.68067 | 0.64109 | 3.92925 |
| 0.64119 | 1.95616 | 0.64118 | 2.68166 | 0.64118 | 3.93043 |
| 0.64129 | 1.9568  | 0.64128 | 2.68267 | 0.64128 | 3.93125 |
| 0.64138 | 1.95753 | 0.64137 | 2.68367 | 0.64137 | 3.93299 |
| 0.64147 | 1.95807 | 0.64146 | 2.6843  | 0.64146 | 3.93408 |
| 0.64157 | 1.9588  | 0.64155 | 2.6853  | 0.64156 | 3.93526 |
| 0.64165 | 1.95962 | 0.64165 | 2.68658 | 0.64165 | 3.93698 |
| 0.64175 | 1.96017 | 0.64174 | 2.68749 | 0.64174 | 3.93899 |
| 0.64184 | 1.9608  | 0.64183 | 2.68822 | 0.64183 | 3.9409  |
| 0.64193 | 1.96144 | 0.64193 | 2.68903 | 0.64193 | 3.942   |
| 0.64202 | 1.96199 | 0.64201 | 2.69013 | 0.64201 | 3.943   |
| 0.64212 | 1.96235 | 0.64211 | 2.69122 | 0.64211 | 3.94491 |
| 0.64221 | 1.9629  | 0.6422  | 2.69213 | 0.6422  | 3.94636 |
| 0.6423  | 1.96335 | 0.6423  | 2.69286 | 0.6423  | 3.94755 |
| 0.6424  | 1.96408 | 0.64239 | 2.69386 | 0.64239 | 3.94882 |
| 0.64248 | 1.9649  | 0.64248 | 2.69523 | 0.64248 | 3.95037 |
| 0.64258 | 1.96544 | 0.64257 | 2.69596 | 0.64257 | 3.95174 |
| 0.64268 | 1.9659  | 0.64266 | 2.69669 | 0.64267 | 3.95319 |
| 0.64276 | 1.96644 | 0.64276 | 2.69741 | 0.64276 | 3.95438 |
| 0.64286 | 1.96727 | 0.64285 | 2.69886 | 0.64285 | 3.95637 |
| 0.64295 | 1.96772 | 0.64294 | 2.69987 | 0.64294 | 3.95756 |
| 0.64305 | 1.96826 | 0.64304 | 2.70087 | 0.64304 | 3.95929 |
| 0.64313 | 1.9689  | 0.64313 | 2.70214 | 0.64313 | 3.96138 |
| 0.64323 | 1.96945 | 0.64322 | 2.70287 | 0.64322 | 3.96248 |
| 0.64333 | 1.97027 | 0.64331 | 2.70396 | 0.64332 | 3.96429 |
| 0.64341 | 1.971   | 0.64341 | 2.70478 | 0.64341 | 3.96566 |
| 0.64351 | 1.97154 | 0.6435  | 2.7056  | 0.6435  | 3.96748 |
| 0.6436  | 1.97181 | 0.64359 | 2.7066  | 0.64359 | 3.96921 |
| 0.64369 | 1.97236 | 0.64368 | 2.70752 | 0.64368 | 3.97094 |
| 0.64378 | 1.97291 | 0.64377 | 2.70851 | 0.64377 | 3.97248 |
| 0.64388 | 1.97364 | 0.64387 | 2.7096  | 0.64387 | 3.97376 |
| 0.64397 | 1.97409 | 0.64396 | 2.7107  | 0.64397 | 3.97549 |
| 0.64406 | 1.97482 | 0.64405 | 2.71161 | 0.64405 | 3.97686 |
| 0.64416 | 1.97528 | 0.64415 | 2.71261 | 0.64415 | 3.97849 |
| 0.64424 | 1.976   | 0.64424 | 2.71397 | 0.64424 | 3.98059 |
| 0.64434 | 1.97691 | 0.64433 | 2.71507 | 0.64433 | 3.98213 |
| 0.64443 | 1.97764 | 0.64442 | 2.71634 | 0.64442 | 3.98396 |
| 0.64452 | 1.978   | 0.64452 | 2.71734 | 0.64452 | 3.9855  |
| 0.64462 | 1.97864 | 0.64461 | 2.71826 | 0.64461 | 3.9865  |
| 0.64471 | 1.97937 | 0.6447  | 2.71935 | 0.6447  | 3.98795 |
| 0.6448  | 1.98028 | 0.6448  | 2.72017 | 0.6448  | 3.98969 |
| 0.64489 | 1.98091 | 0.64489 | 2.72108 | 0.64489 | 3.99096 |
| 0.64499 | 1.98165 | 0.64498 | 2.72199 | 0.64498 | 3.99296 |
| 0.64508 | 1.98173 | 0.64507 | 2.72299 | 0.64507 | 3.99469 |
| 0.64517 | 1.98192 | 0.64517 | 2.72408 | 0.64517 | 3.99587 |
| 0.64527 | 1.98228 | 0.64526 | 2.72527 | 0.64526 | 3.99761 |
| 0.64536 | 1.98301 | 0.64535 | 2.72599 | 0.64535 | 3.99925 |

|         |         |         |         |         |         |
|---------|---------|---------|---------|---------|---------|
| 0.64545 | 1.98392 | 0.64544 | 2.72708 | 0.64544 | 4.00052 |
| 0.64554 | 1.98502 | 0.64553 | 2.72827 | 0.64553 | 4.00188 |
| 0.64564 | 1.98556 | 0.64563 | 2.72899 | 0.64563 | 4.00307 |
| 0.64573 | 1.9861  | 0.64572 | 2.73    | 0.64573 | 4.00462 |
| 0.64582 | 1.98656 | 0.64581 | 2.73073 | 0.64581 | 4.00653 |
| 0.64591 | 1.9871  | 0.64591 | 2.7319  | 0.64591 | 4.00807 |
| 0.646   | 1.98747 | 0.646   | 2.733   | 0.646   | 4.00916 |
| 0.6461  | 1.98774 | 0.64609 | 2.73409 | 0.64609 | 4.0108  |
| 0.64619 | 1.98856 | 0.64618 | 2.73473 | 0.64618 | 4.01262 |
| 0.64628 | 1.98965 | 0.64628 | 2.73591 | 0.64628 | 4.01381 |
| 0.64638 | 1.9902  | 0.64636 | 2.737   | 0.64637 | 4.01535 |
| 0.64647 | 1.99056 | 0.64646 | 2.73782 | 0.64646 | 4.01672 |
| 0.64656 | 1.99093 | 0.64656 | 2.73873 | 0.64656 | 4.01826 |
| 0.64665 | 1.99156 | 0.64665 | 2.73991 | 0.64665 | 4.02    |
| 0.64675 | 1.99221 | 0.64674 | 2.74092 | 0.64674 | 4.02109 |
| 0.64684 | 1.99302 | 0.64683 | 2.7421  | 0.64683 | 4.02255 |
| 0.64693 | 1.99357 | 0.64693 | 2.74346 | 0.64693 | 4.02464 |
| 0.64703 | 1.99439 | 0.64702 | 2.74383 | 0.64702 | 4.02619 |
| 0.64712 | 1.99503 | 0.64711 | 2.74483 | 0.64711 | 4.02801 |
| 0.64721 | 1.99575 | 0.6472  | 2.74629 | 0.6472  | 4.02901 |
| 0.6473  | 1.99621 | 0.64729 | 2.74711 | 0.64729 | 4.0301  |
| 0.6474  | 1.99694 | 0.64739 | 2.74765 | 0.64739 | 4.03147 |
| 0.64749 | 1.99767 | 0.64748 | 2.74911 | 0.64748 | 4.03329 |
| 0.64758 | 1.99821 | 0.64757 | 2.7502  | 0.64757 | 4.03528 |
| 0.64767 | 1.99884 | 0.64767 | 2.7512  | 0.64767 | 4.03638 |
| 0.64776 | 1.99939 | 0.64776 | 2.75266 | 0.64776 | 4.03802 |
| 0.64786 | 1.99985 | 0.64785 | 2.75348 | 0.64785 | 4.03965 |
| 0.64796 | 2.00067 | 0.64794 | 2.75457 | 0.64794 | 4.0412  |
| 0.64804 | 2.00139 | 0.64804 | 2.75575 | 0.64804 | 4.0422  |
| 0.64814 | 2.00194 | 0.64812 | 2.75666 | 0.64813 | 4.0442  |
| 0.64823 | 2.00239 | 0.64822 | 2.75785 | 0.64822 | 4.04621 |
| 0.64832 | 2.00312 | 0.64832 | 2.75885 | 0.64832 | 4.04785 |
| 0.64841 | 2.00376 | 0.64841 | 2.75976 | 0.64841 | 4.0494  |
| 0.64851 | 2.00431 | 0.6485  | 2.76048 | 0.6485  | 4.05085 |
| 0.6486  | 2.00495 | 0.64859 | 2.76176 | 0.64859 | 4.05231 |
| 0.64869 | 2.00558 | 0.64869 | 2.76267 | 0.64868 | 4.05358 |
| 0.64879 | 2.00613 | 0.64878 | 2.76385 | 0.64878 | 4.0555  |
| 0.64887 | 2.00676 | 0.64887 | 2.76531 | 0.64887 | 4.05722 |
| 0.64897 | 2.00731 | 0.64896 | 2.76622 | 0.64896 | 4.05877 |
| 0.64906 | 2.00804 | 0.64905 | 2.76704 | 0.64905 | 4.06068 |
| 0.64915 | 2.00867 | 0.64915 | 2.76823 | 0.64915 | 4.06241 |
| 0.64925 | 2.00895 | 0.64924 | 2.76959 | 0.64924 | 4.06351 |
| 0.64934 | 2.00914 | 0.64933 | 2.77059 | 0.64933 | 4.06523 |
| 0.64943 | 2.00968 | 0.64943 | 2.77187 | 0.64943 | 4.06715 |
| 0.64952 | 2.01059 | 0.64952 | 2.77278 | 0.64952 | 4.06878 |
| 0.64962 | 2.01122 | 0.64961 | 2.77369 | 0.64961 | 4.07024 |
| 0.64971 | 2.01205 | 0.6497  | 2.77469 | 0.6497  | 4.07133 |
| 0.6498  | 2.0125  | 0.64979 | 2.77577 | 0.64979 | 4.07315 |
| 0.6499  | 2.01323 | 0.64988 | 2.77678 | 0.64989 | 4.07479 |
| 0.64999 | 2.01414 | 0.64998 | 2.77797 | 0.64998 | 4.07597 |
| 0.65008 | 2.01486 | 0.65008 | 2.7786  | 0.65008 | 4.07724 |
| 0.65017 | 2.01523 | 0.65016 | 2.77942 | 0.65016 | 4.07898 |
| 0.65027 | 2.01587 | 0.65026 | 2.78051 | 0.65026 | 4.08043 |
| 0.65036 | 2.01641 | 0.65035 | 2.78124 | 0.65035 | 4.08144 |

|         |         |         |         |         |         |
|---------|---------|---------|---------|---------|---------|
| 0.65045 | 2.01723 | 0.65044 | 2.78215 | 0.65044 | 4.0828  |
| 0.65055 | 2.01805 | 0.65053 | 2.78343 | 0.65054 | 4.08462 |
| 0.65064 | 2.01833 | 0.65063 | 2.78451 | 0.65063 | 4.0859  |
| 0.65073 | 2.01878 | 0.65072 | 2.78579 | 0.65072 | 4.08717 |
| 0.65082 | 2.01951 | 0.65081 | 2.78679 | 0.65081 | 4.0888  |
| 0.65091 | 2.01996 | 0.65091 | 2.78743 | 0.65091 | 4.09045 |
| 0.65101 | 2.02078 | 0.651   | 2.78843 | 0.651   | 4.09199 |
| 0.6511  | 2.0216  | 0.65109 | 2.78943 | 0.65109 | 4.0939  |
| 0.65119 | 2.02224 | 0.65118 | 2.79034 | 0.65119 | 4.09554 |
| 0.65128 | 2.02288 | 0.65127 | 2.79134 | 0.65127 | 4.09718 |
| 0.65138 | 2.02315 | 0.65137 | 2.79289 | 0.65137 | 4.09936 |
| 0.65147 | 2.02369 | 0.65146 | 2.79361 | 0.65146 | 4.10155 |
| 0.65156 | 2.02443 | 0.65156 | 2.79444 | 0.65156 | 4.10328 |
| 0.65166 | 2.02497 | 0.65164 | 2.79562 | 0.65165 | 4.10473 |
| 0.65175 | 2.02551 | 0.65174 | 2.79699 | 0.65174 | 4.1061  |
| 0.65184 | 2.02624 | 0.65184 | 2.79808 | 0.65184 | 4.10828 |
| 0.65193 | 2.02679 | 0.65192 | 2.79917 | 0.65192 | 4.11011 |
| 0.65203 | 2.02698 | 0.65202 | 2.79999 | 0.65202 | 4.11129 |
| 0.65211 | 2.02779 | 0.65211 | 2.80117 | 0.65211 | 4.11302 |
| 0.65221 | 2.02843 | 0.6522  | 2.80245 | 0.6522  | 4.11539 |
| 0.65231 | 2.02898 | 0.6523  | 2.80345 | 0.6523  | 4.11666 |
| 0.65239 | 2.02979 | 0.65239 | 2.80482 | 0.65239 | 4.11839 |
| 0.65249 | 2.03025 | 0.65248 | 2.80599 | 0.65248 | 4.1202  |
| 0.65258 | 2.03097 | 0.65257 | 2.80663 | 0.65257 | 4.12121 |
| 0.65267 | 2.0318  | 0.65267 | 2.80745 | 0.65267 | 4.12349 |
| 0.65277 | 2.03261 | 0.65275 | 2.80872 | 0.65276 | 4.12558 |
| 0.65286 | 2.03361 | 0.65285 | 2.80955 | 0.65285 | 4.12694 |
| 0.65295 | 2.03398 | 0.65294 | 2.81064 | 0.65295 | 4.1284  |
| 0.65304 | 2.03452 | 0.65303 | 2.81154 | 0.65303 | 4.13013 |
| 0.65314 | 2.03535 | 0.65313 | 2.81255 | 0.65313 | 4.13149 |
| 0.65323 | 2.03608 | 0.65322 | 2.81346 | 0.65322 | 4.13304 |
| 0.65332 | 2.03644 | 0.65332 | 2.81446 | 0.65332 | 4.1345  |
| 0.65342 | 2.03708 | 0.6534  | 2.81564 | 0.65341 | 4.13587 |
| 0.65351 | 2.03771 | 0.6535  | 2.81682 | 0.6535  | 4.13759 |
| 0.6536  | 2.03817 | 0.6536  | 2.81755 | 0.65359 | 4.13886 |
| 0.65369 | 2.03872 | 0.65368 | 2.8182  | 0.65368 | 4.14042 |
| 0.65378 | 2.03944 | 0.65378 | 2.81946 | 0.65378 | 4.1425  |
| 0.65387 | 2.03999 | 0.65387 | 2.82092 | 0.65387 | 4.14415 |
| 0.65397 | 2.04081 | 0.65396 | 2.82202 | 0.65396 | 4.14542 |
| 0.65407 | 2.04145 | 0.65405 | 2.82293 | 0.65406 | 4.14697 |
| 0.65415 | 2.04208 | 0.65415 | 2.82411 | 0.65415 | 4.14925 |
| 0.65425 | 2.0429  | 0.65424 | 2.8252  | 0.65424 | 4.15088 |
| 0.65434 | 2.04335 | 0.65433 | 2.82611 | 0.65433 | 4.15215 |
| 0.65443 | 2.04381 | 0.65443 | 2.82748 | 0.65443 | 4.1538  |
| 0.65453 | 2.04445 | 0.65451 | 2.82866 | 0.65452 | 4.15525 |
| 0.65462 | 2.0449  | 0.65461 | 2.82994 | 0.65461 | 4.15716 |
| 0.65471 | 2.04554 | 0.6547  | 2.8313  | 0.6547  | 4.15843 |
| 0.6548  | 2.04636 | 0.65479 | 2.83248 | 0.65479 | 4.1598  |
| 0.6549  | 2.0469  | 0.65489 | 2.83339 | 0.65489 | 4.16125 |
| 0.65499 | 2.04772 | 0.65498 | 2.83439 | 0.65498 | 4.16298 |
| 0.65508 | 2.04836 | 0.65507 | 2.83567 | 0.65507 | 4.1649  |
| 0.65518 | 2.049   | 0.65516 | 2.8364  | 0.65517 | 4.16608 |
| 0.65527 | 2.04991 | 0.65526 | 2.83785 | 0.65526 | 4.16717 |
| 0.65536 | 2.05054 | 0.65535 | 2.83894 | 0.65535 | 4.16863 |

|          |          |          |          |          |          |
|----------|----------|----------|----------|----------|----------|
| 0. 65545 | 2. 05128 | 0. 65544 | 2. 84003 | 0. 65544 | 4. 17    |
| 0. 65554 | 2. 05201 | 0. 65554 | 2. 8415  | 0. 65554 | 4. 17172 |
| 0. 65563 | 2. 05264 | 0. 65563 | 2. 84267 | 0. 65563 | 4. 17336 |
| 0. 65573 | 2. 05318 | 0. 65572 | 2. 84367 | 0. 65572 | 4. 17446 |
| 0. 65583 | 2. 05418 | 0. 65581 | 2. 84458 | 0. 65582 | 4. 17573 |
| 0. 65591 | 2. 05491 | 0. 65591 | 2. 84577 | 0. 65591 | 4. 17755 |
| 0. 65601 | 2. 05546 | 0. 656   | 2. 84722 | 0. 656   | 4. 17928 |
| 0. 6561  | 2. 05601 | 0. 65609 | 2. 84823 | 0. 65609 | 4. 18064 |
| 0. 65619 | 2. 05646 | 0. 65618 | 2. 84923 | 0. 65618 | 4. 18228 |
| 0. 65629 | 2. 0571  | 0. 65627 | 2. 85032 | 0. 65628 | 4. 18356 |
| 0. 65638 | 2. 05783 | 0. 65637 | 2. 85114 | 0. 65637 | 4. 18492 |
| 0. 65647 | 2. 05828 | 0. 65646 | 2. 85241 | 0. 65646 | 4. 1871  |
| 0. 65656 | 2. 0591  | 0. 65655 | 2. 8536  | 0. 65655 | 4. 18875 |
| 0. 65666 | 2. 06001 | 0. 65665 | 2. 85442 | 0. 65665 | 4. 19002 |
| 0. 65675 | 2. 06083 | 0. 65674 | 2. 85532 | 0. 65674 | 4. 19193 |
| 0. 65684 | 2. 06129 | 0. 65683 | 2. 85651 | 0. 65683 | 4. 19403 |
| 0. 65694 | 2. 06202 | 0. 65692 | 2. 85752 | 0. 65693 | 4. 19539 |
| 0. 65703 | 2. 06247 | 0. 65702 | 2. 85906 | 0. 65702 | 4. 19739 |
| 0. 65712 | 2. 06301 | 0. 65711 | 2. 86024 | 0. 65711 | 4. 19912 |
| 0. 65721 | 2. 06338 | 0. 6572  | 2. 86134 | 0. 6572  | 4. 20066 |
| 0. 6573  | 2. 06402 | 0. 6573  | 2. 86207 | 0. 6573  | 4. 20222 |
| 0. 65739 | 2. 06447 | 0. 65738 | 2. 86334 | 0. 65738 | 4. 20358 |
| 0. 65749 | 2. 06492 | 0. 65748 | 2. 86479 | 0. 65748 | 4. 20576 |
| 0. 65758 | 2. 06556 | 0. 65757 | 2. 86571 | 0. 65758 | 4. 20731 |
| 0. 65767 | 2. 0662  | 0. 65767 | 2. 8667  | 0. 65767 | 4. 20886 |
| 0. 65777 | 2. 06711 | 0. 65775 | 2. 86779 | 0. 65776 | 4. 2104  |
| 0. 65786 | 2. 06784 | 0. 65785 | 2. 86898 | 0. 65785 | 4. 2114  |
| 0. 65795 | 2. 06839 | 0. 65794 | 2. 8698  | 0. 65794 | 4. 2135  |
| 0. 65805 | 2. 06902 | 0. 65803 | 2. 87098 | 0. 65803 | 4. 21505 |
| 0. 65814 | 2. 06984 | 0. 65813 | 2. 87208 | 0. 65813 | 4. 21651 |
| 0. 65823 | 2. 0703  | 0. 65822 | 2. 87308 | 0. 65822 | 4. 2185  |
| 0. 65832 | 2. 07112 | 0. 65831 | 2. 87417 | 0. 65831 | 4. 22033 |
| 0. 65842 | 2. 07175 | 0. 65841 | 2. 87535 | 0. 65841 | 4. 22224 |
| 0. 65851 | 2. 0723  | 0. 6585  | 2. 87653 | 0. 6585  | 4. 2237  |
| 0. 6586  | 2. 07275 | 0. 65859 | 2. 87781 | 0. 65859 | 4. 22542 |
| 0. 65869 | 2. 0733  | 0. 65868 | 2. 87863 | 0. 65868 | 4. 22697 |
| 0. 65878 | 2. 07384 | 0. 65878 | 2. 87945 | 0. 65878 | 4. 22816 |
| 0. 65888 | 2. 07475 | 0. 65887 | 2. 88045 | 0. 65887 | 4. 22961 |
| 0. 65897 | 2. 07512 | 0. 65896 | 2. 88154 | 0. 65896 | 4. 23134 |
| 0. 65906 | 2. 07585 | 0. 65906 | 2. 88254 | 0. 65906 | 4. 23271 |
| 0. 65915 | 2. 07648 | 0. 65914 | 2. 88336 | 0. 65914 | 4. 23453 |
| 0. 65925 | 2. 07712 | 0. 65924 | 2. 88436 | 0. 65924 | 4. 23598 |
| 0. 65934 | 2. 07776 | 0. 65933 | 2. 88537 | 0. 65934 | 4. 23734 |
| 0. 65943 | 2. 07831 | 0. 65942 | 2. 88664 | 0. 65942 | 4. 23935 |
| 0. 65953 | 2. 07876 | 0. 65952 | 2. 88791 | 0. 65952 | 4. 2408  |
| 0. 65962 | 2. 07967 | 0. 65961 | 2. 88864 | 0. 65961 | 4. 24244 |
| 0. 65971 | 2. 08022 | 0. 6597  | 2. 88964 | 0. 6597  | 4. 2449  |
| 0. 65981 | 2. 08049 | 0. 65979 | 2. 89074 | 0. 65979 | 4. 24673 |
| 0. 6599  | 2. 08113 | 0. 65989 | 2. 89174 | 0. 65989 | 4. 24836 |
| 0. 65999 | 2. 08149 | 0. 65998 | 2. 89301 | 0. 65998 | 4. 25    |
| 0. 66008 | 2. 08194 | 0. 66007 | 2. 89438 | 0. 66007 | 4. 252   |
| 0. 66018 | 2. 08259 | 0. 66017 | 2. 89529 | 0. 66017 | 4. 25382 |
| 0. 66026 | 2. 08322 | 0. 66026 | 2. 89647 | 0. 66026 | 4. 25528 |
| 0. 66036 | 2. 08367 | 0. 66035 | 2. 89747 | 0. 66035 | 4. 25665 |

|         |         |         |         |         |         |
|---------|---------|---------|---------|---------|---------|
| 0.66045 | 2.0844  | 0.66044 | 2.89856 | 0.66044 | 4.25801 |
| 0.66054 | 2.08523 | 0.66054 | 2.89992 | 0.66054 | 4.26019 |
| 0.66064 | 2.08623 | 0.66063 | 2.90084 | 0.66063 | 4.26193 |
| 0.66073 | 2.08659 | 0.66072 | 2.90184 | 0.66072 | 4.2631  |
| 0.66082 | 2.08732 | 0.66082 | 2.90366 | 0.66082 | 4.26474 |
| 0.66091 | 2.08832 | 0.66091 | 2.90511 | 0.66091 | 4.26656 |
| 0.66101 | 2.08887 | 0.661   | 2.90602 | 0.661   | 4.26848 |
| 0.6611  | 2.08941 | 0.66109 | 2.90685 | 0.66109 | 4.2703  |
| 0.66119 | 2.09004 | 0.66118 | 2.90785 | 0.66118 | 4.27221 |
| 0.66129 | 2.0905  | 0.66128 | 2.90903 | 0.66128 | 4.27394 |
| 0.66137 | 2.09123 | 0.66137 | 2.91049 | 0.66137 | 4.27566 |
| 0.66147 | 2.09214 | 0.66146 | 2.91157 | 0.66146 | 4.27712 |
| 0.66157 | 2.0926  | 0.66155 | 2.91267 | 0.66155 | 4.27812 |
| 0.66166 | 2.09305 | 0.66165 | 2.91385 | 0.66165 | 4.28021 |
| 0.66175 | 2.09396 | 0.66174 | 2.91476 | 0.66174 | 4.28213 |
| 0.66184 | 2.09478 | 0.66183 | 2.91585 | 0.66183 | 4.28322 |
| 0.66194 | 2.09523 | 0.66193 | 2.91731 | 0.66193 | 4.28486 |
| 0.66202 | 2.09588 | 0.66202 | 2.91841 | 0.66202 | 4.28714 |
| 0.66212 | 2.09669 | 0.66211 | 2.91932 | 0.66211 | 4.2885  |
| 0.66221 | 2.09723 | 0.6622  | 2.92041 | 0.6622  | 4.29041 |
| 0.6623  | 2.09778 | 0.66229 | 2.92177 | 0.66229 | 4.29196 |
| 0.6624  | 2.09842 | 0.66239 | 2.92305 | 0.66239 | 4.29387 |
| 0.66249 | 2.09924 | 0.66248 | 2.92432 | 0.66248 | 4.29587 |
| 0.66258 | 2.10015 | 0.66258 | 2.92568 | 0.66258 | 4.29787 |
| 0.66267 | 2.10061 | 0.66266 | 2.92659 | 0.66266 | 4.29897 |
| 0.66277 | 2.10088 | 0.66276 | 2.92796 | 0.66276 | 4.30106 |
| 0.66286 | 2.10142 | 0.66285 | 2.92896 | 0.66285 | 4.3027  |
| 0.66295 | 2.10206 | 0.66294 | 2.92997 | 0.66294 | 4.30424 |
| 0.66305 | 2.10315 | 0.66304 | 2.93151 | 0.66304 | 4.30588 |
| 0.66313 | 2.10398 | 0.66313 | 2.93251 | 0.66313 | 4.3077  |
| 0.66323 | 2.10461 | 0.66322 | 2.93342 | 0.66322 | 4.30916 |
| 0.66333 | 2.10525 | 0.66331 | 2.9346  | 0.66331 | 4.31052 |
| 0.66342 | 2.1057  | 0.66341 | 2.93616 | 0.66341 | 4.31243 |
| 0.66351 | 2.1067  | 0.6635  | 2.93715 | 0.6635  | 4.31399 |
| 0.6636  | 2.10743 | 0.66359 | 2.93815 | 0.66359 | 4.31563 |
| 0.66369 | 2.10807 | 0.66369 | 2.93934 | 0.66369 | 4.31753 |
| 0.66378 | 2.10861 | 0.66378 | 2.94061 | 0.66378 | 4.31927 |
| 0.66388 | 2.10916 | 0.66387 | 2.9417  | 0.66387 | 4.32145 |
| 0.66397 | 2.1098  | 0.66396 | 2.94262 | 0.66396 | 4.32309 |
| 0.66406 | 2.11044 | 0.66405 | 2.94379 | 0.66405 | 4.324   |
| 0.66416 | 2.11098 | 0.66414 | 2.94516 | 0.66415 | 4.32563 |
| 0.66425 | 2.11162 | 0.66424 | 2.94598 | 0.66424 | 4.32746 |
| 0.66434 | 2.1118  | 0.66434 | 2.94717 | 0.66434 | 4.32873 |
| 0.66443 | 2.11271 | 0.66442 | 2.94817 | 0.66442 | 4.33073 |
| 0.66453 | 2.11353 | 0.66452 | 2.94944 | 0.66452 | 4.33228 |
| 0.66462 | 2.11444 | 0.66461 | 2.95044 | 0.66461 | 4.33373 |
| 0.66471 | 2.11517 | 0.6647  | 2.9519  | 0.6647  | 4.33538 |
| 0.6648  | 2.11572 | 0.66479 | 2.95353 | 0.6648  | 4.33665 |
| 0.66489 | 2.11626 | 0.66489 | 2.95463 | 0.66489 | 4.33829 |
| 0.66499 | 2.11699 | 0.66498 | 2.95608 | 0.66498 | 4.34056 |
| 0.66508 | 2.11772 | 0.66507 | 2.95736 | 0.66507 | 4.34193 |
| 0.66517 | 2.11844 | 0.66517 | 2.95872 | 0.66517 | 4.34366 |
| 0.66527 | 2.11917 | 0.66526 | 2.95964 | 0.66526 | 4.34557 |
| 0.66536 | 2.11972 | 0.66535 | 2.96063 | 0.66535 | 4.3473  |

|         |         |         |         |         |         |
|---------|---------|---------|---------|---------|---------|
| 0.66545 | 2.12027 | 0.66545 | 2.96154 | 0.66545 | 4.34866 |
| 0.66554 | 2.12081 | 0.66554 | 2.9631  | 0.66554 | 4.35039 |
| 0.66564 | 2.121   | 0.66563 | 2.96446 | 0.66563 | 4.35249 |
| 0.66573 | 2.12172 | 0.66572 | 2.96546 | 0.66572 | 4.35403 |
| 0.66582 | 2.12281 | 0.66581 | 2.96646 | 0.66581 | 4.35594 |
| 0.66592 | 2.12372 | 0.6659  | 2.96737 | 0.66591 | 4.35768 |
| 0.66601 | 2.12445 | 0.666   | 2.96901 | 0.666   | 4.3594  |
| 0.6661  | 2.12481 | 0.66609 | 2.96956 | 0.66609 | 4.36113 |
| 0.66619 | 2.12555 | 0.66618 | 2.97064 | 0.66618 | 4.36286 |
| 0.66628 | 2.12609 | 0.66628 | 2.97192 | 0.66628 | 4.36432 |
| 0.66638 | 2.127   | 0.66637 | 2.9731  | 0.66637 | 4.36587 |
| 0.66647 | 2.12754 | 0.66646 | 2.97411 | 0.66646 | 4.36759 |
| 0.66657 | 2.12837 | 0.66655 | 2.97529 | 0.66656 | 4.36978 |
| 0.66665 | 2.129   | 0.66665 | 2.97638 | 0.66665 | 4.37169 |
| 0.66675 | 2.12946 | 0.66674 | 2.97756 | 0.66674 | 4.37324 |
| 0.66684 | 2.12991 | 0.66683 | 2.97838 | 0.66683 | 4.37433 |
| 0.66693 | 2.13073 | 0.66693 | 2.97957 | 0.66693 | 4.37633 |
| 0.66703 | 2.13119 | 0.66702 | 2.98011 | 0.66702 | 4.3777  |
| 0.66712 | 2.13192 | 0.66711 | 2.98129 | 0.66711 | 4.37925 |
| 0.66721 | 2.13256 | 0.66721 | 2.98239 | 0.66721 | 4.3807  |
| 0.6673  | 2.13328 | 0.66729 | 2.98358 | 0.66729 | 4.38307 |
| 0.6674  | 2.13365 | 0.66739 | 2.98466 | 0.66739 | 4.38453 |
| 0.66748 | 2.13428 | 0.66748 | 2.98567 | 0.66748 | 4.38634 |
| 0.66758 | 2.1351  | 0.66757 | 2.98685 | 0.66757 | 4.3889  |
| 0.66768 | 2.13583 | 0.66766 | 2.98776 | 0.66767 | 4.39072 |
| 0.66776 | 2.13674 | 0.66776 | 2.98904 | 0.66776 | 4.39198 |
| 0.66786 | 2.13747 | 0.66785 | 2.99004 | 0.66785 | 4.39399 |
| 0.66795 | 2.13802 | 0.66794 | 2.99103 | 0.66794 | 4.39545 |
| 0.66804 | 2.13838 | 0.66804 | 2.99249 | 0.66804 | 4.397   |
| 0.66814 | 2.13919 | 0.66813 | 2.99386 | 0.66813 | 4.39936 |
| 0.66823 | 2.13993 | 0.66822 | 2.99513 | 0.66822 | 4.40091 |
| 0.66833 | 2.14038 | 0.66831 | 2.99622 | 0.66832 | 4.40236 |
| 0.66841 | 2.14084 | 0.66841 | 2.99723 | 0.6684  | 4.404   |
| 0.66851 | 2.14165 | 0.6685  | 2.99832 | 0.6685  | 4.40573 |
| 0.6686  | 2.14257 | 0.66859 | 2.99977 | 0.66859 | 4.40719 |
| 0.66869 | 2.1432  | 0.66869 | 3.00068 | 0.66869 | 4.40938 |
| 0.66878 | 2.14393 | 0.66878 | 3.00187 | 0.66878 | 4.41156 |
| 0.66888 | 2.14466 | 0.66887 | 3.00287 | 0.66887 | 4.41365 |
| 0.66897 | 2.14539 | 0.66896 | 3.00414 | 0.66897 | 4.41556 |
| 0.66906 | 2.1462  | 0.66905 | 3.00541 | 0.66905 | 4.41675 |
| 0.66916 | 2.14711 | 0.66915 | 3.00696 | 0.66915 | 4.41866 |
| 0.66925 | 2.1483  | 0.66924 | 3.00842 | 0.66924 | 4.4203  |
| 0.66934 | 2.14903 | 0.66933 | 3.00978 | 0.66933 | 4.42175 |
| 0.66944 | 2.14966 | 0.66942 | 3.01078 | 0.66943 | 4.42357 |
| 0.66952 | 2.15021 | 0.66952 | 3.01197 | 0.66952 | 4.42539 |
| 0.66962 | 2.15094 | 0.66961 | 3.0126  | 0.66961 | 4.42685 |
| 0.66971 | 2.15157 | 0.6697  | 3.01379 | 0.6697  | 4.42848 |
| 0.6698  | 2.15194 | 0.6698  | 3.01516 | 0.6698  | 4.43067 |
| 0.6699  | 2.15285 | 0.66988 | 3.01634 | 0.66989 | 4.43231 |
| 0.66999 | 2.15358 | 0.66998 | 3.01725 | 0.66998 | 4.43376 |
| 0.67008 | 2.15412 | 0.67007 | 3.01889 | 0.67008 | 4.43586 |
| 0.67017 | 2.15486 | 0.67017 | 3.01998 | 0.67017 | 4.43741 |
| 0.67027 | 2.15567 | 0.67026 | 3.02107 | 0.67026 | 4.43941 |
| 0.67036 | 2.15613 | 0.67035 | 3.02225 | 0.67035 | 4.44132 |

|          |          |          |          |          |          |
|----------|----------|----------|----------|----------|----------|
| 0. 67045 | 2. 15676 | 0. 67044 | 3. 02326 | 0. 67044 | 4. 44296 |
| 0. 67054 | 2. 15777 | 0. 67053 | 3. 02489 | 0. 67054 | 4. 44468 |
| 0. 67064 | 2. 1584  | 0. 67063 | 3. 02589 | 0. 67063 | 4. 44696 |
| 0. 67073 | 2. 15913 | 0. 67072 | 3. 02699 | 0. 67073 | 4. 44906 |
| 0. 67082 | 2. 16004 | 0. 67081 | 3. 02881 | 0. 67081 | 4. 45078 |
| 0. 67091 | 2. 16058 | 0. 67091 | 3. 03035 | 0. 67091 | 4. 4526  |
| 0. 67101 | 2. 16113 | 0. 671   | 3. 03145 | 0. 671   | 4. 45397 |
| 0. 6711  | 2. 16195 | 0. 67109 | 3. 03245 | 0. 67109 | 4. 4557  |
| 0. 6712  | 2. 16277 | 0. 67118 | 3. 03418 | 0. 67119 | 4. 45771 |
| 0. 67128 | 2. 16332 | 0. 67128 | 3. 03536 | 0. 67128 | 4. 45962 |
| 0. 67138 | 2. 16377 | 0. 67137 | 3. 03637 | 0. 67137 | 4. 46126 |
| 0. 67147 | 2. 16405 | 0. 67146 | 3. 03791 | 0. 67146 | 4. 46307 |
| 0. 67156 | 2. 16505 | 0. 67156 | 3. 03909 | 0. 67156 | 4. 46453 |
| 0. 67166 | 2. 16604 | 0. 67164 | 3. 04037 | 0. 67164 | 4. 46662 |
| 0. 67175 | 2. 16659 | 0. 67174 | 3. 04137 | 0. 67174 | 4. 46863 |
| 0. 67184 | 2. 16723 | 0. 67183 | 3. 04209 | 0. 67184 | 4. 46981 |
| 0. 67193 | 2. 16778 | 0. 67193 | 3. 04356 | 0. 67193 | 4. 4719  |
| 0. 67203 | 2. 16841 | 0. 67202 | 3. 04465 | 0. 67202 | 4. 47417 |
| 0. 67212 | 2. 16905 | 0. 67211 | 3. 04583 | 0. 67211 | 4. 47536 |
| 0. 67221 | 2. 16987 | 0. 6722  | 3. 04737 | 0. 6722  | 4. 47727 |
| 0. 6723  | 2. 17078 | 0. 67229 | 3. 04874 | 0. 67229 | 4. 47882 |
| 0. 67239 | 2. 17114 | 0. 67239 | 3. 04983 | 0. 67239 | 4. 47982 |
| 0. 67249 | 2. 17178 | 0. 67248 | 3. 05111 | 0. 67248 | 4. 48137 |
| 0. 67258 | 2. 17269 | 0. 67257 | 3. 05211 | 0. 67257 | 4. 48291 |
| 0. 67267 | 2. 17305 | 0. 67267 | 3. 05329 | 0. 67267 | 4. 48437 |
| 0. 67276 | 2. 17396 | 0. 67276 | 3. 05466 | 0. 67276 | 4. 48619 |
| 0. 67286 | 2. 17451 | 0. 67285 | 3. 05584 | 0. 67285 | 4. 4881  |
| 0. 67296 | 2. 17488 | 0. 67294 | 3. 0572  | 0. 67294 | 4. 49019 |
| 0. 67304 | 2. 17551 | 0. 67304 | 3. 05876 | 0. 67304 | 4. 49211 |
| 0. 67314 | 2. 17606 | 0. 67313 | 3. 05957 | 0. 67313 | 4. 49429 |
| 0. 67323 | 2. 17697 | 0. 67322 | 3. 06067 | 0. 67322 | 4. 49584 |
| 0. 67332 | 2. 17788 | 0. 67332 | 3. 06221 | 0. 67331 | 4. 49748 |
| 0. 67342 | 2. 17806 | 0. 6734  | 3. 06385 | 0. 6734  | 4. 49967 |
| 0. 67351 | 2. 17879 | 0. 6735  | 3. 06449 | 0. 6735  | 4. 50167 |
| 0. 6736  | 2. 17989 | 0. 67359 | 3. 06604 | 0. 6736  | 4. 50321 |
| 0. 67369 | 2. 18043 | 0. 67369 | 3. 06749 | 0. 67368 | 4. 50494 |
| 0. 67379 | 2. 18125 | 0. 67378 | 3. 06849 | 0. 67378 | 4. 50658 |
| 0. 67388 | 2. 18216 | 0. 67387 | 3. 06986 | 0. 67387 | 4. 50858 |
| 0. 67397 | 2. 18307 | 0. 67396 | 3. 07131 | 0. 67396 | 4. 51031 |
| 0. 67406 | 2. 18416 | 0. 67405 | 3. 0725  | 0. 67405 | 4. 51241 |
| 0. 67415 | 2. 1848  | 0. 67415 | 3. 07368 | 0. 67415 | 4. 51432 |
| 0. 67425 | 2. 18544 | 0. 67424 | 3. 07504 | 0. 67424 | 4. 51623 |
| 0. 67434 | 2. 18616 | 0. 67433 | 3. 07632 | 0. 67433 | 4. 51841 |
| 0. 67443 | 2. 18717 | 0. 67443 | 3. 07768 | 0. 67443 | 4. 51987 |
| 0. 67452 | 2. 1878  | 0. 67452 | 3. 07914 | 0. 67452 | 4. 52187 |
| 0. 67462 | 2. 18835 | 0. 67461 | 3. 08014 | 0. 67461 | 4. 52387 |
| 0. 67471 | 2. 1888  | 0. 6747  | 3. 08151 | 0. 67471 | 4. 52624 |
| 0. 6748  | 2. 18944 | 0. 67479 | 3. 0826  | 0. 67479 | 4. 52797 |
| 0. 6749  | 2. 19035 | 0. 67489 | 3. 08314 | 0. 67489 | 4. 53006 |
| 0. 67499 | 2. 1909  | 0. 67498 | 3. 08451 | 0. 67498 | 4. 53206 |
| 0. 67508 | 2. 19135 | 0. 67507 | 3. 0857  | 0. 67507 | 4. 53307 |
| 0. 67517 | 2. 19217 | 0. 67516 | 3. 08706 | 0. 67516 | 4. 53479 |
| 0. 67527 | 2. 19326 | 0. 67526 | 3. 08815 | 0. 67526 | 4. 53653 |
| 0. 67536 | 2. 1939  | 0. 67535 | 3. 08943 | 0. 67536 | 4. 53843 |

|          |          |          |          |          |          |
|----------|----------|----------|----------|----------|----------|
| 0. 67545 | 2. 19481 | 0. 67544 | 3. 09052 | 0. 67544 | 4. 5398  |
| 0. 67555 | 2. 19527 | 0. 67554 | 3. 09152 | 0. 67554 | 4. 54162 |
| 0. 67564 | 2. 19599 | 0. 67563 | 3. 0927  | 0. 67563 | 4. 54399 |
| 0. 67573 | 2. 19681 | 0. 67572 | 3. 09416 | 0. 67572 | 4. 54599 |
| 0. 67582 | 2. 19736 | 0. 67581 | 3. 09562 | 0. 67581 | 4. 54745 |
| 0. 67592 | 2. 19808 | 0. 67591 | 3. 0968  | 0. 67591 | 4. 54945 |
| 0. 67601 | 2. 19845 | 0. 676   | 3. 09817 | 0. 676   | 4. 55182 |
| 0. 6761  | 2. 1989  | 0. 67609 | 3. 09944 | 0. 67609 | 4. 55336 |
| 0. 67619 | 2. 19936 | 0. 67619 | 3. 10053 | 0. 67619 | 4. 55537 |
| 0. 67628 | 2. 1999  | 0. 67628 | 3. 10126 | 0. 67628 | 4. 5571  |
| 0. 67638 | 2. 20063 | 0. 67637 | 3. 1028  | 0. 67637 | 4. 55846 |
| 0. 67647 | 2. 20127 | 0. 67646 | 3. 10408 | 0. 67647 | 4. 56119 |
| 0. 67656 | 2. 20209 | 0. 67655 | 3. 10563 | 0. 67655 | 4. 5631  |
| 0. 67666 | 2. 20273 | 0. 67664 | 3. 10699 | 0. 67665 | 4. 56465 |
| 0. 67675 | 2. 20337 | 0. 67674 | 3. 10781 | 0. 67674 | 4. 56656 |
| 0. 67684 | 2. 20427 | 0. 67684 | 3. 10881 | 0. 67684 | 4. 56811 |
| 0. 67693 | 2. 20546 | 0. 67692 | 3. 11054 | 0. 67692 | 4. 57002 |
| 0. 67703 | 2. 20591 | 0. 67702 | 3. 11155 | 0. 67702 | 4. 57202 |
| 0. 67712 | 2. 20628 | 0. 67711 | 3. 11246 | 0. 67711 | 4. 57375 |
| 0. 67721 | 2. 20737 | 0. 6772  | 3. 11427 | 0. 6772  | 4. 5753  |
| 0. 6773  | 2. 2081  | 0. 6773  | 3. 11555 | 0. 6773  | 4. 57767 |
| 0. 67739 | 2. 20883 | 0. 67739 | 3. 11691 | 0. 67739 | 4. 57994 |
| 0. 67749 | 2. 20983 | 0. 67748 | 3. 11846 | 0. 67748 | 4. 58149 |
| 0. 67758 | 2. 21056 | 0. 67757 | 3. 11974 | 0. 67757 | 4. 58331 |
| 0. 67767 | 2. 21074 | 0. 67767 | 3. 12074 | 0. 67767 | 4. 58504 |
| 0. 67777 | 2. 21137 | 0. 67776 | 3. 12192 | 0. 67776 | 4. 58667 |
| 0. 67786 | 2. 2121  | 0. 67785 | 3. 12301 | 0. 67785 | 4. 58832 |
| 0. 67795 | 2. 21265 | 0. 67795 | 3. 12383 | 0. 67795 | 4. 58986 |
| 0. 67804 | 2. 21356 | 0. 67804 | 3. 12529 | 0. 67804 | 4. 59168 |
| 0. 67814 | 2. 21438 | 0. 67813 | 3. 12683 | 0. 67813 | 4. 59405 |
| 0. 67823 | 2. 21511 | 0. 67822 | 3. 12811 | 0. 67822 | 4. 5955  |
| 0. 67832 | 2. 21556 | 0. 67831 | 3. 12893 | 0. 67831 | 4. 59724 |
| 0. 67842 | 2. 21638 | 0. 6784  | 3. 13038 | 0. 67841 | 4. 59906 |
| 0. 67851 | 2. 21729 | 0. 6785  | 3. 13166 | 0. 6785  | 4. 60106 |
| 0. 6786  | 2. 21784 | 0. 6786  | 3. 13275 | 0. 67859 | 4. 60296 |
| 0. 67869 | 2. 21874 | 0. 67868 | 3. 1343  | 0. 67868 | 4. 60525 |
| 0. 67879 | 2. 21966 | 0. 67878 | 3. 13567 | 0. 67878 | 4. 60761 |
| 0. 67887 | 2. 22057 | 0. 67887 | 3. 13675 | 0. 67887 | 4. 60988 |
| 0. 67897 | 2. 22111 | 0. 67896 | 3. 13821 | 0. 67896 | 4. 61153 |
| 0. 67906 | 2. 22185 | 0. 67905 | 3. 13921 | 0. 67906 | 4. 61316 |
| 0. 67915 | 2. 22257 | 0. 67915 | 3. 14076 | 0. 67915 | 4. 61526 |
| 0. 67925 | 2. 22311 | 0. 67924 | 3. 14204 | 0. 67924 | 4. 61762 |
| 0. 67934 | 2. 22366 | 0. 67933 | 3. 14313 | 0. 67933 | 4. 61908 |
| 0. 67943 | 2. 22466 | 0. 67943 | 3. 14476 | 0. 67943 | 4. 62117 |
| 0. 67953 | 2. 22548 | 0. 67951 | 3. 14622 | 0. 67952 | 4. 62326 |
| 0. 67962 | 2. 22594 | 0. 67961 | 3. 14732 | 0. 67961 | 4. 625   |
| 0. 67971 | 2. 22676 | 0. 6797  | 3. 14868 | 0. 6797  | 4. 627   |
| 0. 6798  | 2. 22758 | 0. 6798  | 3. 15014 | 0. 6798  | 4. 629   |
| 0. 6799  | 2. 22876 | 0. 67989 | 3. 15132 | 0. 67989 | 4. 63073 |
| 0. 67998 | 2. 22931 | 0. 67998 | 3. 15268 | 0. 67998 | 4. 63236 |
| 0. 68008 | 2. 23022 | 0. 68007 | 3. 15386 | 0. 68007 | 4. 63519 |
| 0. 68018 | 2. 23095 | 0. 68016 | 3. 1555  | 0. 68017 | 4. 6371  |
| 0. 68027 | 2. 23149 | 0. 68026 | 3. 1565  | 0. 68026 | 4. 63837 |
| 0. 68036 | 2. 23231 | 0. 68035 | 3. 15778 | 0. 68035 | 4. 64047 |



|         |         |         |         |         |         |
|---------|---------|---------|---------|---------|---------|
| 0.68045 | 2.23313 | 0.68044 | 3.15887 | 0.68044 | 4.64219 |
| 0.68055 | 2.23368 | 0.68054 | 3.16015 | 0.68054 | 4.64411 |
| 0.68064 | 2.23422 | 0.68063 | 3.16096 | 0.68063 | 4.64547 |
| 0.68073 | 2.23495 | 0.68072 | 3.16188 | 0.68072 | 4.64711 |
| 0.68082 | 2.23577 | 0.68081 | 3.16352 | 0.68082 | 4.64884 |
| 0.68091 | 2.23668 | 0.68091 | 3.16488 | 0.68091 | 4.65038 |
| 0.68101 | 2.23732 | 0.681   | 3.16616 | 0.681   | 4.65276 |
| 0.6811  | 2.23786 | 0.68109 | 3.1677  | 0.68109 | 4.65448 |
| 0.68119 | 2.23868 | 0.68119 | 3.16879 | 0.68119 | 4.65649 |
| 0.68129 | 2.2395  | 0.68127 | 3.16989 | 0.68128 | 4.65849 |
| 0.68138 | 2.24032 | 0.68137 | 3.17143 | 0.68137 | 4.66068 |
| 0.68147 | 2.24105 | 0.68146 | 3.17252 | 0.68146 | 4.66285 |
| 0.68156 | 2.2416  | 0.68155 | 3.1738  | 0.68155 | 4.66495 |
| 0.68166 | 2.24223 | 0.68165 | 3.17534 | 0.68165 | 4.66659 |
| 0.68174 | 2.24296 | 0.68174 | 3.17689 | 0.68174 | 4.66832 |
| 0.68184 | 2.24359 | 0.68183 | 3.17808 | 0.68183 | 4.67041 |
| 0.68194 | 2.24424 | 0.68192 | 3.17953 | 0.68193 | 4.67241 |
| 0.68203 | 2.24478 | 0.68202 | 3.1809  | 0.68202 | 4.67432 |
| 0.68212 | 2.2456  | 0.68211 | 3.1819  | 0.68211 | 4.67615 |
| 0.68221 | 2.24623 | 0.6822  | 3.18299 | 0.6822  | 4.67761 |
| 0.6823  | 2.24714 | 0.6823  | 3.18445 | 0.6823  | 4.67933 |
| 0.68239 | 2.24797 | 0.68238 | 3.18563 | 0.68238 | 4.68106 |
| 0.68249 | 2.24869 | 0.68248 | 3.187   | 0.68248 | 4.68297 |
| 0.68258 | 2.24951 | 0.68257 | 3.18854 | 0.68258 | 4.68552 |
| 0.68267 | 2.25006 | 0.68267 | 3.18973 | 0.68267 | 4.68734 |
| 0.68277 | 2.25106 | 0.68276 | 3.19109 | 0.68276 | 4.68861 |
| 0.68286 | 2.25224 | 0.68285 | 3.19237 | 0.68285 | 4.69017 |
| 0.68295 | 2.25278 | 0.68295 | 3.19373 | 0.68295 | 4.69226 |
| 0.68305 | 2.25315 | 0.68303 | 3.19473 | 0.68304 | 4.69408 |
| 0.68314 | 2.25379 | 0.68313 | 3.19564 | 0.68313 | 4.69663 |
| 0.68323 | 2.25433 | 0.68322 | 3.19674 | 0.68322 | 4.69827 |
| 0.68332 | 2.25506 | 0.68331 | 3.19783 | 0.68331 | 4.7     |
| 0.68341 | 2.25561 | 0.68341 | 3.19947 | 0.68341 | 4.70172 |
| 0.6835  | 2.2567  | 0.6835  | 3.20038 | 0.6835  | 4.70363 |
| 0.6836  | 2.25725 | 0.68359 | 3.20147 | 0.68359 | 4.70545 |
| 0.6837  | 2.25806 | 0.68368 | 3.20256 | 0.68369 | 4.70719 |
| 0.68378 | 2.25871 | 0.68378 | 3.20347 | 0.68378 | 4.70855 |
| 0.68388 | 2.25943 | 0.68387 | 3.20493 | 0.68387 | 4.71073 |
| 0.68397 | 2.26016 | 0.68396 | 3.20621 | 0.68396 | 4.71274 |
| 0.68406 | 2.2608  | 0.68406 | 3.20747 | 0.68406 | 4.71501 |
| 0.68415 | 2.26171 | 0.68414 | 3.20866 | 0.68414 | 4.71701 |
| 0.68425 | 2.26244 | 0.68424 | 3.21021 | 0.68424 | 4.71929 |
| 0.68434 | 2.26307 | 0.68433 | 3.21139 | 0.68434 | 4.72111 |
| 0.68443 | 2.2638  | 0.68443 | 3.21275 | 0.68443 | 4.72238 |
| 0.68453 | 2.26426 | 0.68452 | 3.21403 | 0.68452 | 4.72475 |
| 0.68462 | 2.26489 | 0.68461 | 3.21512 | 0.68461 | 4.72684 |
| 0.68471 | 2.26571 | 0.68471 | 3.21613 | 0.68471 | 4.72848 |
| 0.68481 | 2.26626 | 0.68479 | 3.2174  | 0.68479 | 4.73075 |
| 0.6849  | 2.26708 | 0.68489 | 3.21894 | 0.68489 | 4.73276 |
| 0.68499 | 2.26817 | 0.68498 | 3.2204  | 0.68498 | 4.73449 |
| 0.68508 | 2.2689  | 0.68507 | 3.22186 | 0.68507 | 4.73631 |
| 0.68518 | 2.26953 | 0.68517 | 3.22323 | 0.68517 | 4.73813 |
| 0.68526 | 2.27053 | 0.68526 | 3.2245  | 0.68526 | 4.73995 |
| 0.68536 | 2.27135 | 0.68535 | 3.2255  | 0.68535 | 4.74168 |

|         |         |         |         |         |         |
|---------|---------|---------|---------|---------|---------|
| 0.68546 | 2.27208 | 0.68544 | 3.2265  | 0.68544 | 4.74368 |
| 0.68554 | 2.27272 | 0.68554 | 3.22832 | 0.68554 | 4.74605 |
| 0.68564 | 2.27381 | 0.68563 | 3.23023 | 0.68563 | 4.74805 |
| 0.68573 | 2.27482 | 0.68572 | 3.23124 | 0.68572 | 4.74924 |
| 0.68582 | 2.27527 | 0.68582 | 3.23241 | 0.68582 | 4.75142 |
| 0.68591 | 2.27582 | 0.6859  | 3.2336  | 0.6859  | 4.75314 |
| 0.68601 | 2.27645 | 0.686   | 3.23497 | 0.686   | 4.75524 |
| 0.6861  | 2.27718 | 0.68609 | 3.23624 | 0.68609 | 4.75688 |
| 0.68619 | 2.27809 | 0.68618 | 3.23761 | 0.68618 | 4.75879 |
| 0.68629 | 2.27872 | 0.68628 | 3.23851 | 0.68628 | 4.7607  |
| 0.68637 | 2.27955 | 0.68637 | 3.24033 | 0.68637 | 4.76243 |
| 0.68647 | 2.28036 | 0.68646 | 3.24152 | 0.68646 | 4.76462 |
| 0.68657 | 2.28101 | 0.68655 | 3.24288 | 0.68655 | 4.7668  |
| 0.68665 | 2.28155 | 0.68665 | 3.24452 | 0.68665 | 4.76862 |
| 0.68675 | 2.28201 | 0.68674 | 3.24616 | 0.68674 | 4.77063 |
| 0.68684 | 2.283   | 0.68683 | 3.24734 | 0.68683 | 4.77217 |
| 0.68694 | 2.28356 | 0.68693 | 3.24862 | 0.68693 | 4.7739  |
| 0.68702 | 2.28446 | 0.68702 | 3.25025 | 0.68702 | 4.77618 |
| 0.68712 | 2.28537 | 0.68711 | 3.25199 | 0.68711 | 4.77845 |
| 0.68721 | 2.2861  | 0.6872  | 3.25317 | 0.6872  | 4.78018 |
| 0.6873  | 2.28683 | 0.6873  | 3.25444 | 0.6873  | 4.78209 |
| 0.6874  | 2.28747 | 0.68739 | 3.2559  | 0.68739 | 4.78373 |
| 0.68749 | 2.28838 | 0.68748 | 3.25727 | 0.68748 | 4.7861  |
| 0.68758 | 2.28902 | 0.68758 | 3.25854 | 0.68758 | 4.78828 |
| 0.68767 | 2.28974 | 0.68766 | 3.25991 | 0.68766 | 4.79092 |
| 0.68777 | 2.29047 | 0.68776 | 3.26145 | 0.68776 | 4.79328 |
| 0.68786 | 2.29138 | 0.68785 | 3.263   | 0.68786 | 4.7952  |
| 0.68795 | 2.29229 | 0.68794 | 3.26409 | 0.68794 | 4.79711 |
| 0.68805 | 2.29311 | 0.68804 | 3.26546 | 0.68804 | 4.79929 |
| 0.68813 | 2.29393 | 0.68813 | 3.26728 | 0.68813 | 4.80157 |
| 0.68823 | 2.29456 | 0.68822 | 3.26873 | 0.68822 | 4.80375 |
| 0.68832 | 2.2953  | 0.68831 | 3.26991 | 0.68831 | 4.80502 |
| 0.68841 | 2.29602 | 0.68841 | 3.2711  | 0.68841 | 4.80739 |
| 0.68851 | 2.29639 | 0.6885  | 3.27264 | 0.6885  | 4.80931 |
| 0.6886  | 2.29748 | 0.68859 | 3.27429 | 0.68859 | 4.81076 |
| 0.68869 | 2.2983  | 0.68869 | 3.27529 | 0.68869 | 4.81258 |
| 0.68878 | 2.2993  | 0.68878 | 3.27638 | 0.68878 | 4.8145  |
| 0.68888 | 2.30021 | 0.68887 | 3.27765 | 0.68887 | 4.8164  |
| 0.68897 | 2.30103 | 0.68896 | 3.27892 | 0.68896 | 4.81786 |
| 0.68906 | 2.30157 | 0.68905 | 3.27992 | 0.68905 | 4.82014 |
| 0.68916 | 2.30185 | 0.68915 | 3.28148 | 0.68915 | 4.8225  |
| 0.68925 | 2.30258 | 0.68924 | 3.28302 | 0.68924 | 4.82469 |
| 0.68934 | 2.30321 | 0.68934 | 3.28438 | 0.68934 | 4.82742 |
| 0.68943 | 2.30385 | 0.68942 | 3.28566 | 0.68942 | 4.82933 |
| 0.68953 | 2.30476 | 0.68952 | 3.28757 | 0.68952 | 4.83124 |
| 0.68962 | 2.30512 | 0.68961 | 3.28912 | 0.68962 | 4.83333 |
| 0.68971 | 2.30576 | 0.6897  | 3.29049 | 0.6897  | 4.83452 |
| 0.68981 | 2.30658 | 0.6898  | 3.29167 | 0.6898  | 4.83679 |
| 0.68989 | 2.30731 | 0.68989 | 3.29285 | 0.68989 | 4.83852 |
| 0.68999 | 2.30777 | 0.68998 | 3.29422 | 0.68998 | 4.84061 |
| 0.69008 | 2.30867 | 0.69007 | 3.29558 | 0.69007 | 4.84289 |
| 0.69017 | 2.30949 | 0.69017 | 3.29695 | 0.69017 | 4.84471 |
| 0.69027 | 2.31031 | 0.69025 | 3.29823 | 0.69026 | 4.84671 |
| 0.69036 | 2.31104 | 0.69035 | 3.29923 | 0.69035 | 4.84899 |

|         |         |         |         |         |         |
|---------|---------|---------|---------|---------|---------|
| 0.69045 | 2.31177 | 0.69045 | 3.30059 | 0.69045 | 4.8509  |
| 0.69054 | 2.31268 | 0.69054 | 3.30186 | 0.69054 | 4.85327 |
| 0.69064 | 2.31386 | 0.69063 | 3.30314 | 0.69063 | 4.85545 |
| 0.69073 | 2.31459 | 0.69072 | 3.30432 | 0.69072 | 4.85745 |
| 0.69082 | 2.31541 | 0.69081 | 3.30551 | 0.69081 | 4.8591  |
| 0.69092 | 2.31604 | 0.69091 | 3.30733 | 0.69091 | 4.86092 |
| 0.691   | 2.31677 | 0.691   | 3.3086  | 0.691   | 4.86255 |
| 0.6911  | 2.31732 | 0.6911  | 3.30969 | 0.69109 | 4.8641  |
| 0.69119 | 2.31805 | 0.69118 | 3.31133 | 0.69118 | 4.86637 |
| 0.69128 | 2.31877 | 0.69128 | 3.31269 | 0.69128 | 4.86801 |
| 0.69138 | 2.31977 | 0.69137 | 3.31387 | 0.69137 | 4.86983 |
| 0.69147 | 2.3205  | 0.69146 | 3.31524 | 0.69146 | 4.87156 |
| 0.69157 | 2.32123 | 0.69156 | 3.31606 | 0.69156 | 4.87329 |
| 0.69165 | 2.32206 | 0.69165 | 3.31733 | 0.69165 | 4.87484 |
| 0.69175 | 2.32278 | 0.69174 | 3.31897 | 0.69174 | 4.87675 |
| 0.69184 | 2.3236  | 0.69183 | 3.32043 | 0.69183 | 4.87921 |
| 0.69193 | 2.32469 | 0.69193 | 3.32207 | 0.69193 | 4.88112 |
| 0.69203 | 2.32524 | 0.69201 | 3.32326 | 0.69202 | 4.88276 |
| 0.69212 | 2.32596 | 0.69211 | 3.32471 | 0.69211 | 4.88531 |
| 0.69221 | 2.32642 | 0.69221 | 3.32626 | 0.69221 | 4.88694 |
| 0.6923  | 2.32697 | 0.6923  | 3.32762 | 0.6923  | 4.88913 |
| 0.6924  | 2.32797 | 0.69239 | 3.32853 | 0.69239 | 4.89186 |
| 0.69249 | 2.32897 | 0.69248 | 3.3299  | 0.69248 | 4.8935  |
| 0.69258 | 2.32961 | 0.69257 | 3.33136 | 0.69257 | 4.89559 |
| 0.69268 | 2.33016 | 0.69266 | 3.33281 | 0.69267 | 4.89795 |
| 0.69276 | 2.33097 | 0.69276 | 3.33399 | 0.69276 | 4.8996  |
| 0.69286 | 2.3317  | 0.69285 | 3.33563 | 0.69285 | 4.9015  |
| 0.69295 | 2.33215 | 0.69294 | 3.33709 | 0.69294 | 4.90333 |
| 0.69304 | 2.33315 | 0.69304 | 3.33854 | 0.69304 | 4.90551 |
| 0.69314 | 2.33406 | 0.69313 | 3.33973 | 0.69313 | 4.90769 |
| 0.69323 | 2.33516 | 0.69322 | 3.34127 | 0.69322 | 4.90979 |
| 0.69332 | 2.33625 | 0.69331 | 3.34273 | 0.69332 | 4.91042 |
| 0.69341 | 2.33689 | 0.69341 | 3.34373 | 0.6934  | 4.91261 |
| 0.69351 | 2.33744 | 0.6935  | 3.34509 | 0.6935  | 4.91543 |
| 0.6936  | 2.33798 | 0.69359 | 3.34628 | 0.69359 | 4.91789 |
| 0.69369 | 2.3388  | 0.69368 | 3.34773 | 0.69368 | 4.91971 |
| 0.69379 | 2.33953 | 0.69377 | 3.3491  | 0.69378 | 4.92208 |
| 0.69388 | 2.34035 | 0.69387 | 3.35029 | 0.69387 | 4.92372 |
| 0.69397 | 2.34126 | 0.69396 | 3.35165 | 0.69397 | 4.92572 |
| 0.69406 | 2.34235 | 0.69405 | 3.35319 | 0.69405 | 4.92827 |
| 0.69416 | 2.34308 | 0.69415 | 3.3541  | 0.69415 | 4.93009 |
| 0.69425 | 2.34399 | 0.69424 | 3.35557 | 0.69424 | 4.93173 |
| 0.69434 | 2.34453 | 0.69433 | 3.3573  | 0.69433 | 4.93391 |
| 0.69443 | 2.34544 | 0.69442 | 3.35884 | 0.69443 | 4.93554 |
| 0.69453 | 2.34635 | 0.69452 | 3.36048 | 0.69452 | 4.93783 |
| 0.69462 | 2.34735 | 0.69461 | 3.36185 | 0.69461 | 4.93992 |
| 0.69471 | 2.34818 | 0.6947  | 3.3633  | 0.6947  | 4.94192 |
| 0.6948  | 2.34872 | 0.6948  | 3.36449 | 0.6948  | 4.94438 |
| 0.6949  | 2.34936 | 0.69489 | 3.36639 | 0.69489 | 4.94693 |
| 0.69499 | 2.35027 | 0.69498 | 3.36785 | 0.69498 | 4.94866 |
| 0.69508 | 2.35073 | 0.69507 | 3.36912 | 0.69508 | 4.95075 |
| 0.69517 | 2.35154 | 0.69516 | 3.3704  | 0.69516 | 4.95348 |
| 0.69527 | 2.35209 | 0.69526 | 3.37186 | 0.69526 | 4.95494 |
| 0.69536 | 2.35281 | 0.69535 | 3.37322 | 0.69535 | 4.95684 |

|         |         |         |         |         |         |
|---------|---------|---------|---------|---------|---------|
| 0.69545 | 2.35382 | 0.69545 | 3.37495 | 0.69545 | 4.95949 |
| 0.69555 | 2.35473 | 0.69553 | 3.37631 | 0.69554 | 4.96139 |
| 0.69564 | 2.35564 | 0.69563 | 3.37805 | 0.69563 | 4.96377 |
| 0.69573 | 2.35646 | 0.69572 | 3.37941 | 0.69572 | 4.96613 |
| 0.69582 | 2.3571  | 0.69581 | 3.3805  | 0.69581 | 4.96795 |
| 0.69591 | 2.35782 | 0.69591 | 3.38205 | 0.69591 | 4.96959 |
| 0.69601 | 2.35846 | 0.696   | 3.38369 | 0.696   | 4.9715  |
| 0.6961  | 2.35937 | 0.69609 | 3.38514 | 0.69609 | 4.97332 |
| 0.69619 | 2.36019 | 0.69618 | 3.38651 | 0.69619 | 4.9755  |
| 0.69628 | 2.36101 | 0.69628 | 3.38787 | 0.69628 | 4.9776  |
| 0.69638 | 2.36183 | 0.69637 | 3.3896  | 0.69637 | 4.97942 |
| 0.69647 | 2.36228 | 0.69646 | 3.39097 | 0.69646 | 4.98179 |
| 0.69656 | 2.36311 | 0.69656 | 3.39233 | 0.69656 | 4.9837  |
| 0.69666 | 2.36401 | 0.69665 | 3.39342 | 0.69665 | 4.98552 |
| 0.69675 | 2.3651  | 0.69674 | 3.3947  | 0.69674 | 4.98725 |
| 0.69684 | 2.36574 | 0.69683 | 3.39615 | 0.69684 | 4.98898 |
| 0.69693 | 2.36683 | 0.69692 | 3.39788 | 0.69692 | 4.99088 |
| 0.69703 | 2.36792 | 0.69702 | 3.39916 | 0.69702 | 4.99343 |
| 0.69712 | 2.36883 | 0.69711 | 3.40061 | 0.69711 | 4.99553 |
| 0.69721 | 2.36984 | 0.69721 | 3.40171 | 0.69721 | 4.99726 |
| 0.69731 | 2.37074 | 0.69729 | 3.40353 | 0.6973  | 4.99899 |
| 0.6974  | 2.37139 | 0.69739 | 3.40544 | 0.69739 | 5.00071 |
| 0.69749 | 2.37229 | 0.69748 | 3.40726 | 0.69748 | 5.00272 |
| 0.69758 | 2.37302 | 0.69757 | 3.40899 | 0.69757 | 5.00527 |
| 0.69767 | 2.37403 | 0.69767 | 3.41063 | 0.69767 | 5.00727 |
| 0.69776 | 2.37476 | 0.69776 | 3.41263 | 0.69776 | 5.00909 |
| 0.69786 | 2.37548 | 0.69785 | 3.41427 | 0.69785 | 5.01127 |
| 0.69795 | 2.37602 | 0.69794 | 3.41591 | 0.69795 | 5.01346 |
| 0.69804 | 2.37648 | 0.69804 | 3.41745 | 0.69804 | 5.0151  |
| 0.69814 | 2.37739 | 0.69812 | 3.41918 | 0.69813 | 5.01737 |
| 0.69823 | 2.37803 | 0.69822 | 3.42046 | 0.69822 | 5.01974 |
| 0.69832 | 2.37858 | 0.69832 | 3.42191 | 0.69831 | 5.02192 |
| 0.69842 | 2.3794  | 0.69841 | 3.42328 | 0.69841 | 5.02402 |
| 0.69851 | 2.38049 | 0.6985  | 3.42492 | 0.6985  | 5.02557 |
| 0.6986  | 2.38158 | 0.69859 | 3.42637 | 0.69859 | 5.02711 |
| 0.69869 | 2.38204 | 0.69868 | 3.42765 | 0.69868 | 5.02984 |
| 0.69879 | 2.38285 | 0.69878 | 3.4292  | 0.69878 | 5.03212 |
| 0.69888 | 2.38412 | 0.69887 | 3.43092 | 0.69887 | 5.03412 |
| 0.69897 | 2.38504 | 0.69896 | 3.43248 | 0.69896 | 5.0364  |
| 0.69907 | 2.38585 | 0.69905 | 3.43393 | 0.69905 | 5.0383  |
| 0.69916 | 2.38695 | 0.69915 | 3.43584 | 0.69915 | 5.04031 |
| 0.69925 | 2.38758 | 0.69924 | 3.43729 | 0.69924 | 5.04268 |
| 0.69934 | 2.38804 | 0.69933 | 3.43857 | 0.69933 | 5.04468 |
| 0.69943 | 2.38877 | 0.69943 | 3.44003 | 0.69943 | 5.04659 |
| 0.69952 | 2.38968 | 0.69952 | 3.44158 | 0.69952 | 5.04869 |
| 0.69962 | 2.39077 | 0.69961 | 3.44276 | 0.69961 | 5.05068 |
| 0.69971 | 2.3915  | 0.6997  | 3.44394 | 0.69971 | 5.05251 |
| 0.6998  | 2.39205 | 0.6998  | 3.44531 | 0.6998  | 5.05451 |
| 0.6999  | 2.39286 | 0.69988 | 3.44631 | 0.69989 | 5.0566  |
| 0.69999 | 2.39369 | 0.69998 | 3.44785 | 0.69998 | 5.05833 |
| 0.70008 | 2.39432 | 0.70007 | 3.44931 | 0.70007 | 5.06024 |
