# Supplementary material for: Enhanced Thermal Insulation and Flame-Retardant Properties of Polyvinyl Alcohol-Based Aerogels Composited with Ammonium Polyphosphate and Chitosan
Source: Hindawi journal article supplement (doi:10.1155/2021/5555916), 2021-05-28
Supplement: f1 [file 5555916.f1.zip]

Archive with 7 entries (7 files):
- Supplementary Description.docx
- The data of Compressive stress-strain for Figure 6.pdf
- The data of Cone calorimeter test for Figure 10.pdf
- The data of FTIR for Figure 2.pdf
- The data of Rheological properties for Figure 5.pdf
- The data of TGA for Figure 9.pdf
- The data of XRD for Figure 4.pdf
