# Supplementary material for: Enhanced Thermal Insulation and Flame-Retardant Properties of Polyvinyl Alcohol-Based Aerogels Composited with Ammonium Polyphosphate and Chitosan
Source: Hindawi journal article supplement (doi:10.1155/2021/5555916), 2021-05-28
Supplement: f1 [file 5555916.f1.zip]

|             | 0               |             | 5               |             |
|-------------|-----------------|-------------|-----------------|-------------|
| Temperature | Residual Weight | Temperature | Residual Weight | Temperature |
| 30.2        | 99.7365         | 48.74       | 99.75           | 49.08       |
| 30.2        | 99.728          | 48.76       | 99.733          | 49.09       |
| 30.2        | 99.7195         | 48.78       | 99.705          | 49.1        |
| 30.2        | 99.711          | 48.8        | 99.69           | 49.11       |
| 30.2        | 99.7025         | 48.82       | 99.67           | 49.12       |
| 30.2        | 99.694          | 48.83       | 99.655          | 49.13       |
| 30.2        | 99.6855         | 48.85       | 99.638          | 49.14       |
| 30.2        | 99.6685         | 48.87       | 99.621          | 49.15       |
| 30.2        | 99.6566         | 48.89       | 99.601          | 49.16       |
| 30.2        | 99.6515         | 48.91       | 99.583          | 49.17       |
| 30.2        | 99.6447         | 48.93       | 99.571          | 49.18       |
| 30.2        | 99.6345         | 48.94       | 99.563          | 49.19       |
| 30.2        | 99.6277         | 48.96       | 99.546          | 49.2        |
| 30.21       | 99.6158         | 48.98       | 99.523          | 49.21       |
| 30.21       | 99.609          | 49          | 99.511          | 49.23       |
| 30.22       | 99.6022         | 49.03       | 99.501          | 49.24       |
| 30.23       | 99.5954         | 49.05       | 99.491          | 49.26       |
| 30.24       | 99.5903         | 49.08       | 99.478          | 49.28       |
| 30.25       | 99.5852         | 49.11       | 99.458          | 49.3        |
| 30.27       | 99.5767         | 49.14       | 99.446          | 49.33       |
| 30.28       | 99.5699         | 49.17       | 99.433          | 49.36       |
| 30.31       | 99.5614         | 49.21       | 99.418          | 49.39       |
| 30.33       | 99.5529         | 49.25       | 99.401          | 49.42       |
| 30.36       | 99.541          | 49.29       | 99.386          | 49.46       |
| 30.39       | 99.5342         | 49.34       | 99.368          | 49.49       |
| 30.42       | 99.5291         | 49.38       | 99.356          | 49.53       |
| 30.45       | 99.5223         | 49.43       | 99.338          | 49.58       |
| 30.49       | 99.5121         | 49.48       | 99.323          | 49.62       |
| 30.53       | 99.5036         | 49.54       | 99.316          | 49.67       |
| 30.57       | 99.4985         | 49.59       | 99.306          | 49.72       |
| 30.61       | 99.4917         | 49.65       | 99.291          | 49.77       |
| 30.66       | 99.4815         | 49.71       | 99.271          | 49.82       |
| 30.7        | 99.4747         | 49.77       | 99.256          | 49.88       |
| 30.75       | 99.4679         | 49.83       | 99.244          | 49.93       |
| 30.8        | 99.4611         | 49.9        | 99.231          | 49.99       |
| 30.85       | 99.4526         | 49.96       | 99.219          | 50.05       |
| 30.91       | 99.4424         | 50.03       | 99.199          | 50.11       |
| 30.96       | 99.4356         | 50.1        | 99.184          | 50.18       |
| 31.02       | 99.4305         | 50.17       | 99.171          | 50.24       |
| 31.08       | 99.4237         | 50.24       | 99.154          | 50.31       |
| 31.14       | 99.4152         | 50.32       | 99.139          | 50.37       |
| 31.2        | 99.405          | 50.39       | 99.126          | 50.44       |
| 31.26       | 99.3965         | 50.47       | 99.109          | 50.51       |
| 31.33       | 99.3914         | 50.54       | 99.091          | 50.59       |
| 31.4        | 99.388          | 50.62       | 99.074          | 50.66       |
| 31.46       | 99.3829         | 50.7        | 99.066          | 50.73       |
| 31.53       | 99.37271        | 50.78       | 99.054          | 50.81       |
| 31.6        | 99.36421        | 50.87       | 99.034          | 50.89       |
| 31.67       | 99.35401        | 50.95       | 99.024          | 50.97       |
| 31.75       | 99.34721        | 51.04       | 99.011          | 51.05       |
| 31.82       | 99.34041        | 51.12       | 98.996          | 51.13       |
| 31.9        | 99.33361        | 51.21       | 98.986          | 51.21       |

|        |           |        |         |        |
|--------|-----------|--------|---------|--------|
| 31. 97 | 99. 32511 | 51. 3  | 98. 969 | 51. 29 |
| 32. 05 | 99. 31661 | 51. 39 | 98. 944 | 51. 38 |
| 32. 13 | 99. 30981 | 51. 48 | 98. 929 | 51. 47 |
| 32. 21 | 99. 30131 | 51. 57 | 98. 924 | 51. 55 |
| 32. 29 | 99. 29791 | 51. 67 | 98. 907 | 51. 64 |
| 32. 37 | 99. 28941 | 51. 76 | 98. 894 | 51. 73 |
| 32. 46 | 99. 28091 | 51. 86 | 98. 884 | 51. 82 |
| 32. 54 | 99. 27241 | 51. 95 | 98. 859 | 51. 91 |
| 32. 63 | 99. 26561 | 52. 05 | 98. 847 | 52. 01 |
| 32. 71 | 99. 26051 | 52. 15 | 98. 837 | 52. 1  |
| 32. 8  | 99. 25711 | 52. 25 | 98. 822 | 52. 2  |
| 32. 89 | 99. 24521 | 52. 35 | 98. 804 | 52. 29 |
| 32. 98 | 99. 23671 | 52. 45 | 98. 784 | 52. 39 |
| 33. 07 | 99. 23161 | 52. 55 | 98. 767 | 52. 49 |
| 33. 17 | 99. 22651 | 52. 66 | 98. 757 | 52. 59 |
| 33. 26 | 99. 22141 | 52. 76 | 98. 739 | 52. 69 |
| 33. 35 | 99. 21121 | 52. 87 | 98. 724 | 52. 79 |
| 33. 45 | 99. 20441 | 52. 98 | 98. 704 | 52. 89 |
| 33. 55 | 99. 19591 | 53. 08 | 98. 692 | 53     |
| 33. 64 | 99. 18911 | 53. 19 | 98. 679 | 53. 1  |
| 33. 74 | 99. 18401 | 53. 3  | 98. 667 | 53. 21 |
| 33. 84 | 99. 17551 | 53. 41 | 98. 654 | 53. 31 |
| 33. 94 | 99. 16701 | 53. 52 | 98. 642 | 53. 42 |
| 34. 04 | 99. 16191 | 53. 63 | 98. 629 | 53. 53 |
| 34. 15 | 99. 15341 | 53. 75 | 98. 61  | 53. 64 |
| 34. 25 | 99. 14661 | 53. 86 | 98. 59  | 53. 75 |
| 34. 35 | 99. 13811 | 53. 98 | 98. 577 | 53. 86 |
| 34. 46 | 99. 13301 | 54. 09 | 98. 557 | 53. 97 |
| 34. 56 | 99. 12621 | 54. 21 | 98. 545 | 54. 08 |
| 34. 67 | 99. 11941 | 54. 32 | 98. 53  | 54. 2  |
| 34. 78 | 99. 11261 | 54. 44 | 98. 517 | 54. 31 |
| 34. 89 | 99. 10241 | 54. 56 | 98. 502 | 54. 43 |
| 34. 99 | 99. 09731 | 54. 68 | 98. 487 | 54. 54 |
| 35. 1  | 99. 09221 | 54. 8  | 98. 477 | 54. 66 |
| 35. 21 | 99. 08371 | 54. 92 | 98. 462 | 54. 78 |
| 35. 33 | 99. 07351 | 55. 04 | 98. 442 | 54. 9  |
| 35. 44 | 99. 06161 | 55. 16 | 98. 422 | 55. 01 |
| 35. 55 | 99. 05651 | 55. 29 | 98. 41  | 55. 13 |
| 35. 66 | 99. 04801 | 55. 41 | 98. 392 | 55. 25 |
| 35. 78 | 99. 04291 | 55. 53 | 98. 372 | 55. 38 |
| 35. 89 | 99. 04121 | 55. 66 | 98. 357 | 55. 5  |
| 36. 01 | 99. 03441 | 55. 79 | 98. 347 | 55. 62 |
| 36. 12 | 99. 02591 | 55. 91 | 98. 335 | 55. 74 |
| 36. 24 | 99. 01741 | 56. 04 | 98. 312 | 55. 87 |
| 36. 36 | 99. 00721 | 56. 17 | 98. 297 | 55. 99 |
| 36. 48 | 98. 99531 | 56. 29 | 98. 275 | 56. 12 |
| 36. 6  | 98. 98851 | 56. 42 | 98. 26  | 56. 24 |
| 36. 71 | 98. 98511 | 56. 55 | 98. 245 | 56. 37 |
| 36. 83 | 98. 97831 | 56. 68 | 98. 23  | 56. 5  |
| 36. 96 | 98. 96811 | 56. 81 | 98. 213 | 56. 62 |
| 37. 08 | 98. 95621 | 56. 94 | 98. 2   | 56. 75 |
| 37. 2  | 98. 94941 | 57. 08 | 98. 175 | 56. 88 |
| 37. 32 | 98. 94601 | 57. 21 | 98. 16  | 57. 01 |
| 37. 44 | 98. 93751 | 57. 34 | 98. 145 | 57. 14 |

|        |           |        |         |        |
|--------|-----------|--------|---------|--------|
| 37. 57 | 98. 92901 | 57. 47 | 98. 133 | 57. 27 |
| 37. 69 | 98. 91711 | 57. 61 | 98. 11  | 57. 4  |
| 37. 82 | 98. 91031 | 57. 74 | 98. 09  | 57. 53 |
| 37. 94 | 98. 90521 | 57. 88 | 98. 07  | 57. 67 |
| 38. 07 | 98. 90011 | 58. 01 | 98. 06  | 57. 8  |
| 38. 2  | 98. 88991 | 58. 15 | 98. 043 | 57. 93 |
| 38. 32 | 98. 88311 | 58. 29 | 98. 018 | 58. 07 |
| 38. 45 | 98. 87631 | 58. 42 | 98. 005 | 58. 2  |
| 38. 58 | 98. 86611 | 58. 56 | 97. 995 | 58. 34 |
| 38. 71 | 98. 85421 | 58. 7  | 97. 978 | 58. 47 |
| 38. 84 | 98. 84911 | 58. 84 | 97. 96  | 58. 61 |
| 38. 96 | 98. 83721 | 58. 98 | 97. 938 | 58. 74 |
| 39. 09 | 98. 83041 | 59. 11 | 97. 926 | 58. 88 |
| 39. 23 | 98. 82361 | 59. 25 | 97. 908 | 59. 02 |
| 39. 36 | 98. 81341 | 59. 4  | 97. 893 | 59. 16 |
| 39. 49 | 98. 80321 | 59. 54 | 97. 876 | 59. 3  |
| 39. 62 | 98. 79811 | 59. 68 | 97. 856 | 59. 43 |
| 39. 75 | 98. 78961 | 59. 82 | 97. 843 | 59. 57 |
| 39. 88 | 98. 78111 | 59. 96 | 97. 828 | 59. 71 |
| 40. 02 | 98. 77261 | 60. 1  | 97. 811 | 59. 85 |
| 40. 15 | 98. 76751 | 60. 25 | 97. 783 | 59. 99 |
| 40. 29 | 98. 76241 | 60. 39 | 97. 768 | 60. 13 |
| 40. 42 | 98. 75221 | 60. 53 | 97. 753 | 60. 28 |
| 40. 56 | 98. 74371 | 60. 68 | 97. 731 | 60. 42 |
| 40. 69 | 98. 73521 | 60. 82 | 97. 713 | 60. 56 |
| 40. 83 | 98. 72671 | 60. 97 | 97. 696 | 60. 7  |
| 40. 96 | 98. 71651 | 61. 11 | 97. 676 | 60. 85 |
| 41. 1  | 98. 71311 | 61. 26 | 97. 666 | 60. 99 |
| 41. 24 | 98. 70461 | 61. 4  | 97. 651 | 61. 13 |
| 41. 38 | 98. 68931 | 61. 55 | 97. 626 | 61. 28 |
| 41. 52 | 98. 67571 | 61. 69 | 97. 613 | 61. 42 |
| 41. 66 | 98. 66721 | 61. 84 | 97. 591 | 61. 57 |
| 41. 8  | 98. 66381 | 61. 99 | 97. 566 | 61. 71 |
| 41. 94 | 98. 65361 | 62. 14 | 97. 546 | 61. 86 |
| 42. 08 | 98. 64681 | 62. 28 | 97. 531 | 62     |
| 42. 22 | 98. 63661 | 62. 43 | 97. 514 | 62. 15 |
| 42. 36 | 98. 62641 | 62. 58 | 97. 499 | 62. 3  |
| 42. 5  | 98. 61961 | 62. 73 | 97. 479 | 62. 44 |
| 42. 64 | 98. 60771 | 62. 88 | 97. 464 | 62. 59 |
| 42. 79 | 98. 59751 | 63. 03 | 97. 446 | 62. 74 |
| 42. 93 | 98. 59411 | 63. 18 | 97. 431 | 62. 89 |
| 43. 07 | 98. 58221 | 63. 33 | 97. 401 | 63. 03 |
| 43. 22 | 98. 57031 | 63. 48 | 97. 384 | 63. 18 |
| 43. 36 | 98. 55841 | 63. 63 | 97. 369 | 63. 33 |
| 43. 51 | 98. 54821 | 63. 78 | 97. 359 | 63. 48 |
| 43. 65 | 98. 54311 | 63. 93 | 97. 334 | 63. 63 |
| 43. 8  | 98. 53291 | 64. 08 | 97. 306 | 63. 78 |
| 43. 95 | 98. 52101 | 64. 23 | 97. 294 | 63. 93 |
| 44. 09 | 98. 51251 | 64. 38 | 97. 274 | 64. 08 |
| 44. 24 | 98. 50401 | 64. 54 | 97. 254 | 64. 23 |
| 44. 38 | 98. 49211 | 64. 69 | 97. 241 | 64. 38 |
| 44. 53 | 98. 48701 | 64. 84 | 97. 222 | 64. 53 |
| 44. 68 | 98. 47511 | 64. 99 | 97. 189 | 64. 68 |
| 44. 83 | 98. 46491 | 65. 15 | 97. 184 | 64. 84 |

|        |           |        |         |        |
|--------|-----------|--------|---------|--------|
| 44. 98 | 98. 45641 | 65. 3  | 97. 167 | 64. 99 |
| 45. 12 | 98. 44621 | 65. 46 | 97. 144 | 65. 14 |
| 45. 27 | 98. 43601 | 65. 61 | 97. 124 | 65. 29 |
| 45. 42 | 98. 42411 | 65. 76 | 97. 107 | 65. 44 |
| 45. 57 | 98. 41221 | 65. 92 | 97. 097 | 65. 6  |
| 45. 72 | 98. 40541 | 66. 07 | 97. 072 | 65. 75 |
| 45. 87 | 98. 39691 | 66. 23 | 97. 047 | 65. 9  |
| 46. 02 | 98. 38501 | 66. 38 | 97. 037 | 66. 06 |
| 46. 17 | 98. 37311 | 66. 54 | 97. 012 | 66. 21 |
| 46. 32 | 98. 36461 | 66. 69 | 96. 994 | 66. 36 |
| 46. 48 | 98. 35781 | 66. 85 | 96. 977 | 66. 52 |
| 46. 63 | 98. 34761 | 67. 01 | 96. 957 | 66. 67 |
| 46. 78 | 98. 33571 | 67. 16 | 96. 937 | 66. 83 |
| 46. 93 | 98. 32721 | 67. 32 | 96. 919 | 66. 98 |
| 47. 08 | 98. 31701 | 67. 47 | 96. 904 | 67. 14 |
| 47. 24 | 98. 30681 | 67. 63 | 96. 88  | 67. 29 |
| 47. 39 | 98. 29831 | 67. 79 | 96. 865 | 67. 45 |
| 47. 54 | 98. 28301 | 67. 95 | 96. 852 | 67. 6  |
| 47. 7  | 98. 26941 | 68. 1  | 96. 825 | 67. 76 |
| 47. 85 | 98. 25921 | 68. 26 | 96. 802 | 67. 92 |
| 48     | 98. 24731 | 68. 42 | 96. 78  | 68. 07 |
| 48. 16 | 98. 23881 | 68. 58 | 96. 76  | 68. 23 |
| 48. 31 | 98. 22861 | 68. 73 | 96. 747 | 68. 39 |
| 48. 47 | 98. 22011 | 68. 89 | 96. 722 | 68. 54 |
| 48. 62 | 98. 20821 | 69. 05 | 96. 707 | 68. 7  |
| 48. 78 | 98. 19291 | 69. 21 | 96. 69  | 68. 86 |
| 48. 93 | 98. 18101 | 69. 37 | 96. 672 | 69. 01 |
| 49. 09 | 98. 17251 | 69. 53 | 96. 647 | 69. 17 |
| 49. 24 | 98. 16401 | 69. 68 | 96. 627 | 69. 33 |
| 49. 4  | 98. 15381 | 69. 84 | 96. 607 | 69. 49 |
| 49. 56 | 98. 14191 | 70     | 96. 592 | 69. 65 |
| 49. 71 | 98. 12831 | 70. 16 | 96. 577 | 69. 8  |
| 49. 87 | 98. 11642 | 70. 32 | 96. 56  | 69. 96 |
| 50. 02 | 98. 10962 | 70. 48 | 96. 535 | 70. 12 |
| 50. 18 | 98. 09432 | 70. 64 | 96. 51  | 70. 28 |
| 50. 34 | 98. 08412 | 70. 8  | 96. 49  | 70. 44 |
| 50. 5  | 98. 07222 | 70. 96 | 96. 468 | 70. 6  |
| 50. 65 | 98. 06372 | 71. 12 | 96. 46  | 70. 75 |
| 50. 81 | 98. 05012 | 71. 28 | 96. 438 | 70. 91 |
| 50. 97 | 98. 03312 | 71. 44 | 96. 415 | 71. 07 |
| 51. 13 | 98. 02122 | 71. 6  | 96. 395 | 71. 23 |
| 51. 28 | 98. 01442 | 71. 77 | 96. 36  | 71. 39 |
| 51. 44 | 98. 00252 | 71. 93 | 96. 348 | 71. 55 |
| 51. 6  | 97. 99062 | 72. 09 | 96. 328 | 71. 71 |
| 51. 76 | 97. 98042 | 72. 25 | 96. 315 | 71. 87 |
| 51. 92 | 97. 96852 | 72. 41 | 96. 303 | 72. 03 |
| 52. 08 | 97. 95832 | 72. 57 | 96. 283 | 72. 19 |
| 52. 24 | 97. 94472 | 72. 73 | 96. 253 | 72. 35 |
| 52. 4  | 97. 93112 | 72. 89 | 96. 235 | 72. 51 |
| 52. 56 | 97. 92092 | 73. 06 | 96. 22  | 72. 67 |
| 52. 72 | 97. 90732 | 73. 22 | 96. 201 | 72. 83 |
| 52. 87 | 97. 89372 | 73. 38 | 96. 176 | 73     |
| 53. 03 | 97. 88352 | 73. 54 | 96. 156 | 73. 16 |
| 53. 19 | 97. 86992 | 73. 71 | 96. 138 | 73. 32 |

|       |          |       |        |       |
|-------|----------|-------|--------|-------|
| 53.35 | 97.85632 | 73.87 | 96.126 | 73.48 |
| 53.52 | 97.84612 | 74.03 | 96.093 | 73.64 |
| 53.68 | 97.83252 | 74.19 | 96.071 | 73.8  |
| 53.84 | 97.82062 | 74.36 | 96.051 | 73.96 |
| 54    | 97.80702 | 74.52 | 96.031 | 74.12 |
| 54.16 | 97.79342 | 74.68 | 96.016 | 74.29 |
| 54.32 | 97.78492 | 74.84 | 95.988 | 74.45 |
| 54.48 | 97.76962 | 75.01 | 95.963 | 74.61 |
| 54.64 | 97.75602 | 75.17 | 95.946 | 74.77 |
| 54.8  | 97.73902 | 75.33 | 95.938 | 74.93 |
| 54.96 | 97.73222 | 75.5  | 95.901 | 75.1  |
| 55.13 | 97.71522 | 75.66 | 95.893 | 75.26 |
| 55.29 | 97.69652 | 75.82 | 95.876 | 75.42 |
| 55.45 | 97.68292 | 75.99 | 95.861 | 75.58 |
| 55.61 | 97.67442 | 76.15 | 95.839 | 75.75 |
| 55.77 | 97.66422 | 76.32 | 95.824 | 75.91 |
| 55.94 | 97.65062 | 76.48 | 95.796 | 76.07 |
| 56.1  | 97.63702 | 76.64 | 95.771 | 76.23 |
| 56.26 | 97.62172 | 76.81 | 95.759 | 76.4  |
| 56.42 | 97.60982 | 76.97 | 95.739 | 76.56 |
| 56.59 | 97.59622 | 77.14 | 95.719 | 76.72 |
| 56.75 | 97.58262 | 77.3  | 95.694 | 76.89 |
| 56.91 | 97.56902 | 77.46 | 95.679 | 77.05 |
| 57.07 | 97.55882 | 77.63 | 95.664 | 77.21 |
| 57.24 | 97.54352 | 77.79 | 95.641 | 77.38 |
| 57.4  | 97.52822 | 77.96 | 95.624 | 77.54 |
| 57.56 | 97.51122 | 78.12 | 95.604 | 77.7  |
| 57.73 | 97.49762 | 78.29 | 95.584 | 77.87 |
| 57.89 | 97.49422 | 78.45 | 95.564 | 78.03 |
| 58.05 | 97.47892 | 78.62 | 95.546 | 78.19 |
| 58.22 | 97.46362 | 78.78 | 95.517 | 78.36 |
| 58.38 | 97.44662 | 78.95 | 95.504 | 78.52 |
| 58.54 | 97.43132 | 79.11 | 95.487 | 78.69 |
| 58.71 | 97.41432 | 79.28 | 95.467 | 78.85 |
| 58.87 | 97.40582 | 79.44 | 95.447 | 79.01 |
| 59.04 | 97.39052 | 79.61 | 95.434 | 79.18 |
| 59.2  | 97.37692 | 79.77 | 95.414 | 79.34 |
| 59.36 | 97.36332 | 79.94 | 95.389 | 79.51 |
| 59.53 | 97.34292 | 80.1  | 95.364 | 79.67 |
| 59.69 | 97.32762 | 80.27 | 95.342 | 79.83 |
| 59.86 | 97.31572 | 80.43 | 95.334 | 80    |
| 60.02 | 97.30552 | 80.6  | 95.319 | 80.16 |
| 60.19 | 97.29192 | 80.76 | 95.292 | 80.33 |
| 60.35 | 97.27832 | 80.93 | 95.269 | 80.49 |
| 60.51 | 97.26472 | 81.1  | 95.249 | 80.66 |
| 60.68 | 97.24262 | 81.26 | 95.234 | 80.82 |
| 60.84 | 97.23072 | 81.43 | 95.212 | 80.99 |
| 61.01 | 97.21712 | 81.59 | 95.184 | 81.15 |
| 61.17 | 97.20522 | 81.76 | 95.162 | 81.32 |
| 61.34 | 97.18482 | 81.92 | 95.145 | 81.48 |
| 61.5  | 97.16782 | 82.09 | 95.13  | 81.65 |
| 61.67 | 97.15252 | 82.26 | 95.105 | 81.81 |
| 61.83 | 97.13212 | 82.42 | 95.092 | 81.98 |
| 62    | 97.12192 | 82.59 | 95.075 | 82.14 |

|        |           |        |         |        |
|--------|-----------|--------|---------|--------|
| 62. 16 | 97. 10832 | 82. 76 | 95. 052 | 82. 31 |
| 62. 33 | 97. 09302 | 82. 92 | 95. 04  | 82. 47 |
| 62. 49 | 97. 07092 | 83. 09 | 95. 017 | 82. 64 |
| 62. 66 | 97. 05732 | 83. 25 | 94. 99  | 82. 8  |
| 62. 82 | 97. 04032 | 83. 42 | 94. 975 | 82. 97 |
| 62. 99 | 97. 02672 | 83. 59 | 94. 947 | 83. 13 |
| 63. 16 | 97. 00802 | 83. 75 | 94. 932 | 83. 3  |
| 63. 32 | 96. 98932 | 83. 92 | 94. 905 | 83. 46 |
| 63. 49 | 96. 97742 | 84. 09 | 94. 882 | 83. 63 |
| 63. 65 | 96. 96042 | 84. 25 | 94. 865 | 83. 79 |
| 63. 82 | 96. 94852 | 84. 42 | 94. 847 | 83. 96 |
| 63. 98 | 96. 93322 | 84. 59 | 94. 83  | 84. 13 |
| 64. 15 | 96. 91112 | 84. 75 | 94. 815 | 84. 29 |
| 64. 31 | 96. 89922 | 84. 92 | 94. 79  | 84. 46 |
| 64. 48 | 96. 87712 | 85. 09 | 94. 778 | 84. 62 |
| 64. 65 | 96. 86353 | 85. 25 | 94. 755 | 84. 79 |
| 64. 81 | 96. 85503 | 85. 42 | 94. 733 | 84. 95 |
| 64. 98 | 96. 83973 | 85. 59 | 94. 715 | 85. 12 |
| 65. 14 | 96. 81763 | 85. 75 | 94. 703 | 85. 29 |
| 65. 31 | 96. 80063 | 85. 92 | 94. 683 | 85. 45 |
| 65. 48 | 96. 78193 | 86. 09 | 94. 663 | 85. 62 |
| 65. 64 | 96. 76153 | 86. 25 | 94. 643 | 85. 78 |
| 65. 81 | 96. 74963 | 86. 42 | 94. 62  | 85. 95 |
| 65. 97 | 96. 73943 | 86. 59 | 94. 61  | 86. 12 |
| 66. 14 | 96. 72413 | 86. 75 | 94. 588 | 86. 28 |
| 66. 31 | 96. 70033 | 86. 92 | 94. 57  | 86. 45 |
| 66. 47 | 96. 68333 | 87. 09 | 94. 553 | 86. 61 |
| 66. 64 | 96. 66803 | 87. 25 | 94. 53  | 86. 78 |
| 66. 81 | 96. 65443 | 87. 42 | 94. 513 | 86. 95 |
| 66. 97 | 96. 64253 | 87. 59 | 94. 5   | 87. 11 |
| 67. 14 | 96. 62553 | 87. 76 | 94. 478 | 87. 28 |
| 67. 31 | 96. 60343 | 87. 92 | 94. 456 | 87. 44 |
| 67. 47 | 96. 58473 | 88. 09 | 94. 433 | 87. 61 |
| 67. 64 | 96. 56603 | 88. 26 | 94. 423 | 87. 78 |
| 67. 81 | 96. 55073 | 88. 42 | 94. 401 | 87. 94 |
| 67. 97 | 96. 53203 | 88. 59 | 94. 381 | 88. 11 |
| 68. 14 | 96. 51503 | 88. 76 | 94. 366 | 88. 28 |
| 68. 3  | 96. 49803 | 88. 93 | 94. 348 | 88. 44 |
| 68. 47 | 96. 47933 | 89. 09 | 94. 333 | 88. 61 |
| 68. 64 | 96. 46573 | 89. 26 | 94. 311 | 88. 77 |
| 68. 8  | 96. 44873 | 89. 43 | 94. 288 | 88. 94 |
| 68. 97 | 96. 43513 | 89. 6  | 94. 276 | 89. 11 |
| 69. 14 | 96. 41983 | 89. 76 | 94. 256 | 89. 27 |
| 69. 31 | 96. 40283 | 89. 93 | 94. 236 | 89. 44 |
| 69. 47 | 96. 38073 | 90. 1  | 94. 223 | 89. 61 |
| 69. 64 | 96. 36203 | 90. 27 | 94. 201 | 89. 77 |
| 69. 81 | 96. 34163 | 90. 43 | 94. 188 | 89. 94 |
| 69. 97 | 96. 32803 | 90. 6  | 94. 168 | 90. 11 |
| 70. 14 | 96. 31613 | 90. 77 | 94. 143 | 90. 27 |
| 70. 31 | 96. 29403 | 90. 94 | 94. 131 | 90. 44 |
| 70. 47 | 96. 26853 | 91. 1  | 94. 114 | 90. 61 |
| 70. 64 | 96. 24643 | 91. 27 | 94. 101 | 90. 77 |
| 70. 81 | 96. 22943 | 91. 44 | 94. 076 | 90. 94 |
| 70. 97 | 96. 21583 | 91. 61 | 94. 056 | 91. 11 |

|        |           |         |         |         |
|--------|-----------|---------|---------|---------|
| 71. 14 | 96. 20053 | 91. 77  | 94. 039 | 91. 27  |
| 71. 31 | 96. 18013 | 91. 94  | 94. 026 | 91. 44  |
| 71. 47 | 96. 15463 | 92. 11  | 94. 009 | 91. 6   |
| 71. 64 | 96. 14273 | 92. 28  | 93. 989 | 91. 77  |
| 71. 81 | 96. 12743 | 92. 44  | 93. 966 | 91. 94  |
| 71. 98 | 96. 10533 | 92. 61  | 93. 959 | 92. 1   |
| 72. 14 | 96. 09003 | 92. 78  | 93. 944 | 92. 27  |
| 72. 31 | 96. 07813 | 92. 95  | 93. 924 | 92. 44  |
| 72. 48 | 96. 05433 | 93. 11  | 93. 896 | 92. 61  |
| 72. 64 | 96. 03223 | 93. 28  | 93. 881 | 92. 77  |
| 72. 81 | 96. 00673 | 93. 45  | 93. 866 | 92. 94  |
| 72. 98 | 95. 99313 | 93. 62  | 93. 846 | 93. 11  |
| 73. 15 | 95. 98463 | 93. 79  | 93. 821 | 93. 27  |
| 73. 31 | 95. 96933 | 93. 95  | 93. 804 | 93. 44  |
| 73. 48 | 95. 95063 | 94. 12  | 93. 789 | 93. 61  |
| 73. 65 | 95. 92683 | 94. 29  | 93. 779 | 93. 77  |
| 73. 81 | 95. 90983 | 94. 46  | 93. 764 | 93. 94  |
| 73. 98 | 95. 89283 | 94. 62  | 93. 747 | 94. 11  |
| 74. 15 | 95. 87413 | 94. 79  | 93. 722 | 94. 27  |
| 74. 32 | 95. 85373 | 94. 96  | 93. 707 | 94. 44  |
| 74. 48 | 95. 83843 | 95. 13  | 93. 692 | 94. 61  |
| 74. 65 | 95. 81633 | 95. 3   | 93. 677 | 94. 77  |
| 74. 82 | 95. 78913 | 95. 46  | 93. 662 | 94. 94  |
| 74. 99 | 95. 77213 | 95. 63  | 93. 642 | 95. 11  |
| 75. 15 | 95. 75853 | 95. 8   | 93. 624 | 95. 27  |
| 75. 32 | 95. 74153 | 95. 97  | 93. 612 | 95. 44  |
| 75. 49 | 95. 73133 | 96. 13  | 93. 597 | 95. 61  |
| 75. 66 | 95. 70753 | 96. 3   | 93. 582 | 95. 78  |
| 75. 82 | 95. 68373 | 96. 47  | 93. 562 | 95. 94  |
| 75. 99 | 95. 66673 | 96. 64  | 93. 539 | 96. 11  |
| 76. 16 | 95. 65313 | 96. 81  | 93. 532 | 96. 28  |
| 76. 32 | 95. 63103 | 96. 97  | 93. 514 | 96. 44  |
| 76. 49 | 95. 61404 | 97. 14  | 93. 504 | 96. 61  |
| 76. 66 | 95. 59194 | 97. 31  | 93. 484 | 96. 78  |
| 76. 83 | 95. 57154 | 97. 48  | 93. 467 | 96. 94  |
| 76. 99 | 95. 55284 | 97. 65  | 93. 454 | 97. 11  |
| 77. 16 | 95. 52904 | 97. 81  | 93. 445 | 97. 28  |
| 77. 33 | 95. 51034 | 97. 98  | 93. 425 | 97. 45  |
| 77. 5  | 95. 48654 | 98. 15  | 93. 407 | 97. 61  |
| 77. 66 | 95. 47124 | 98. 32  | 93. 39  | 97. 78  |
| 77. 83 | 95. 44744 | 98. 49  | 93. 38  | 97. 95  |
| 78     | 95. 43044 | 98. 65  | 93. 365 | 98. 11  |
| 78. 17 | 95. 41004 | 98. 82  | 93. 347 | 98. 28  |
| 78. 33 | 95. 39304 | 98. 99  | 93. 332 | 98. 45  |
| 78. 5  | 95. 37944 | 99. 16  | 93. 312 | 98. 61  |
| 78. 67 | 95. 36074 | 99. 33  | 93. 297 | 98. 78  |
| 78. 84 | 95. 34204 | 99. 49  | 93. 28  | 98. 95  |
| 79     | 95. 32334 | 99. 66  | 93. 272 | 99. 12  |
| 79. 17 | 95. 29614 | 99. 83  | 93. 255 | 99. 28  |
| 79. 34 | 95. 27574 | 100     | 93. 232 | 99. 45  |
| 79. 5  | 95. 25874 | 100. 17 | 93. 212 | 99. 62  |
| 79. 67 | 95. 23834 | 100. 33 | 93. 197 | 99. 78  |
| 79. 84 | 95. 21114 | 100. 5  | 93. 19  | 99. 95  |
| 80. 01 | 95. 19074 | 100. 67 | 93. 172 | 100. 12 |

|       |          |        |        |        |
|-------|----------|--------|--------|--------|
| 80.17 | 95.18054 | 100.84 | 93.15  | 100.28 |
| 80.34 | 95.15334 | 101.01 | 93.135 | 100.45 |
| 80.51 | 95.13294 | 101.17 | 93.12  | 100.62 |
| 80.68 | 95.11934 | 101.34 | 93.105 | 100.79 |
| 80.84 | 95.09724 | 101.51 | 93.093 | 100.95 |
| 81.01 | 95.07514 | 101.68 | 93.073 | 101.12 |
| 81.18 | 95.06154 | 101.85 | 93.06  | 101.29 |
| 81.35 | 95.02924 | 102.01 | 93.05  | 101.45 |
| 81.51 | 95.01394 | 102.18 | 93.033 | 101.62 |
| 81.68 | 94.99184 | 102.35 | 93.023 | 101.79 |
| 81.85 | 94.97314 | 102.52 | 93.008 | 101.95 |
| 82.02 | 94.96124 | 102.69 | 92.99  | 102.12 |
| 82.18 | 94.93404 | 102.85 | 92.978 | 102.29 |
| 82.35 | 94.91364 | 103.02 | 92.963 | 102.46 |
| 82.52 | 94.89154 | 103.19 | 92.948 | 102.62 |
| 82.69 | 94.87114 | 103.36 | 92.935 | 102.79 |
| 82.85 | 94.85074 | 103.53 | 92.92  | 102.96 |
| 83.02 | 94.83034 | 103.69 | 92.903 | 103.12 |
| 83.19 | 94.81504 | 103.86 | 92.89  | 103.29 |
| 83.36 | 94.79124 | 104.03 | 92.875 | 103.46 |
| 83.52 | 94.76914 | 104.2  | 92.863 | 103.63 |
| 83.69 | 94.74534 | 104.37 | 92.85  | 103.79 |
| 83.86 | 94.73004 | 104.53 | 92.83  | 103.96 |
| 84.03 | 94.70624 | 104.7  | 92.818 | 104.13 |
| 84.19 | 94.68244 | 104.87 | 92.803 | 104.29 |
| 84.36 | 94.66374 | 105.04 | 92.79  | 104.46 |
| 84.53 | 94.63654 | 105.21 | 92.773 | 104.63 |
| 84.69 | 94.62294 | 105.37 | 92.763 | 104.8  |
| 84.86 | 94.60594 | 105.54 | 92.743 | 104.96 |
| 85.03 | 94.58384 | 105.71 | 92.728 | 105.13 |
| 85.2  | 94.55664 | 105.88 | 92.713 | 105.3  |
| 85.36 | 94.53454 | 106.05 | 92.701 | 105.46 |
| 85.53 | 94.51244 | 106.21 | 92.686 | 105.63 |
| 85.7  | 94.49034 | 106.38 | 92.668 | 105.8  |
| 85.87 | 94.47164 | 106.55 | 92.658 | 105.96 |
| 86.03 | 94.45124 | 106.72 | 92.651 | 106.13 |
| 86.2  | 94.43424 | 106.88 | 92.631 | 106.3  |
| 86.37 | 94.40534 | 107.05 | 92.611 | 106.47 |
| 86.54 | 94.38154 | 107.22 | 92.598 | 106.63 |
| 86.7  | 94.36285 | 107.39 | 92.588 | 106.8  |
| 86.87 | 94.34755 | 107.56 | 92.576 | 106.97 |
| 87.04 | 94.32375 | 107.72 | 92.563 | 107.13 |
| 87.21 | 94.30845 | 107.89 | 92.541 | 107.3  |
| 87.37 | 94.28635 | 108.06 | 92.528 | 107.47 |
| 87.54 | 94.25915 | 108.23 | 92.516 | 107.63 |
| 87.71 | 94.23875 | 108.4  | 92.511 | 107.8  |
| 87.88 | 94.21495 | 108.56 | 92.496 | 107.97 |
| 88.04 | 94.19795 | 108.73 | 92.478 | 108.14 |
| 88.21 | 94.17585 | 108.9  | 92.461 | 108.3  |
| 88.38 | 94.15205 | 109.07 | 92.456 | 108.47 |
| 88.54 | 94.12825 | 109.23 | 92.443 | 108.64 |
| 88.71 | 94.10785 | 109.4  | 92.433 | 108.8  |
| 88.88 | 94.09085 | 109.57 | 92.414 | 108.97 |
| 89.05 | 94.07045 | 109.74 | 92.401 | 109.14 |



|        |           |         |         |         |
|--------|-----------|---------|---------|---------|
| 89. 21 | 94. 05515 | 109. 91 | 92. 386 | 109. 3  |
| 89. 38 | 94. 03305 | 110. 07 | 92. 374 | 109. 47 |
| 89. 55 | 94. 00245 | 110. 24 | 92. 359 | 109. 64 |
| 89. 72 | 93. 97865 | 110. 41 | 92. 336 | 109. 81 |
| 89. 88 | 93. 95485 | 110. 58 | 92. 321 | 109. 97 |
| 90. 05 | 93. 93445 | 110. 75 | 92. 309 | 110. 14 |
| 90. 22 | 93. 91405 | 110. 91 | 92. 301 | 110. 31 |
| 90. 39 | 93. 89365 | 111. 08 | 92. 284 | 110. 47 |
| 90. 55 | 93. 87325 | 111. 25 | 92. 269 | 110. 64 |
| 90. 72 | 93. 84945 | 111. 42 | 92. 254 | 110. 81 |
| 90. 89 | 93. 82225 | 111. 58 | 92. 244 | 110. 97 |
| 91. 05 | 93. 80865 | 111. 75 | 92. 236 | 111. 14 |
| 91. 22 | 93. 79165 | 111. 92 | 92. 221 | 111. 31 |
| 91. 39 | 93. 76275 | 112. 09 | 92. 206 | 111. 47 |
| 91. 56 | 93. 73725 | 112. 26 | 92. 201 | 111. 64 |
| 91. 72 | 93. 72365 | 112. 42 | 92. 191 | 111. 81 |
| 91. 89 | 93. 69305 | 112. 59 | 92. 176 | 111. 98 |
| 92. 06 | 93. 66755 | 112. 76 | 92. 154 | 112. 14 |
| 92. 23 | 93. 64885 | 112. 93 | 92. 141 | 112. 31 |
| 92. 39 | 93. 62845 | 113. 09 | 92. 139 | 112. 48 |
| 92. 56 | 93. 59445 | 113. 26 | 92. 124 | 112. 64 |
| 92. 73 | 93. 57745 | 113. 43 | 92. 116 | 112. 81 |
| 92. 89 | 93. 55705 | 113. 6  | 92. 106 | 112. 98 |
| 93. 06 | 93. 53155 | 113. 77 | 92. 091 | 113. 14 |
| 93. 23 | 93. 51285 | 113. 93 | 92. 076 | 113. 31 |
| 93. 4  | 93. 49075 | 114. 1  | 92. 064 | 113. 48 |
| 93. 56 | 93. 46695 | 114. 27 | 92. 047 | 113. 64 |
| 93. 73 | 93. 44655 | 114. 44 | 92. 034 | 113. 81 |
| 93. 9  | 93. 41765 | 114. 6  | 92. 017 | 113. 98 |
| 94. 06 | 93. 39385 | 114. 77 | 92. 002 | 114. 14 |
| 94. 23 | 93. 37855 | 114. 94 | 91. 994 | 114. 31 |
| 94. 4  | 93. 35305 | 115. 11 | 91. 994 | 114. 48 |
| 94. 57 | 93. 33435 | 115. 28 | 91. 972 | 114. 64 |
| 94. 73 | 93. 30545 | 115. 44 | 91. 954 | 114. 81 |
| 94. 9  | 93. 28335 | 115. 61 | 91. 942 | 114. 98 |
| 95. 07 | 93. 26465 | 115. 78 | 91. 934 | 115. 15 |
| 95. 23 | 93. 24085 | 115. 95 | 91. 917 | 115. 31 |
| 95. 4  | 93. 21365 | 116. 11 | 91. 902 | 115. 48 |
| 95. 57 | 93. 18815 | 116. 28 | 91. 894 | 115. 65 |
| 95. 74 | 93. 17285 | 116. 45 | 91. 889 | 115. 81 |
| 95. 9  | 93. 15245 | 116. 62 | 91. 874 | 115. 98 |
| 96. 07 | 93. 12695 | 116. 78 | 91. 864 | 116. 15 |
| 96. 24 | 93. 09296 | 116. 95 | 91. 854 | 116. 31 |
| 96. 4  | 93. 07766 | 117. 12 | 91. 844 | 116. 48 |
| 96. 57 | 93. 05556 | 117. 29 | 91. 829 | 116. 65 |
| 96. 74 | 93. 03856 | 117. 45 | 91. 822 | 116. 81 |
| 96. 91 | 93. 00626 | 117. 62 | 91. 807 | 116. 98 |
| 97. 07 | 92. 98246 | 117. 79 | 91. 794 | 117. 15 |
| 97. 24 | 92. 96546 | 117. 96 | 91. 777 | 117. 31 |
| 97. 41 | 92. 93996 | 118. 13 | 91. 767 | 117. 48 |
| 97. 57 | 92. 91786 | 118. 29 | 91. 754 | 117. 65 |
| 97. 74 | 92. 89576 | 118. 46 | 91. 739 | 117. 81 |
| 97. 91 | 92. 86856 | 118. 63 | 91. 734 | 117. 98 |
| 98. 08 | 92. 84816 | 118. 8  | 91. 729 | 118. 15 |

|         |           |         |         |         |
|---------|-----------|---------|---------|---------|
| 98. 24  | 92. 82266 | 118. 96 | 91. 715 | 118. 31 |
| 98. 41  | 92. 79886 | 119. 13 | 91. 7   | 118. 48 |
| 98. 58  | 92. 77846 | 119. 3  | 91. 685 | 118. 65 |
| 98. 74  | 92. 75466 | 119. 47 | 91. 68  | 118. 81 |
| 98. 91  | 92. 72406 | 119. 63 | 91. 67  | 118. 98 |
| 99. 08  | 92. 70536 | 119. 8  | 91. 655 | 119. 15 |
| 99. 24  | 92. 67986 | 119. 97 | 91. 642 | 119. 31 |
| 99. 41  | 92. 66286 | 120. 13 | 91. 63  | 119. 48 |
| 99. 58  | 92. 64246 | 120. 3  | 91. 617 | 119. 65 |
| 99. 75  | 92. 61356 | 120. 47 | 91. 605 | 119. 81 |
| 99. 91  | 92. 59316 | 120. 64 | 91. 595 | 119. 98 |
| 100. 08 | 92. 56936 | 120. 8  | 91. 585 | 120. 15 |
| 100. 25 | 92. 54896 | 120. 97 | 91. 577 | 120. 31 |
| 100. 41 | 92. 52856 | 121. 14 | 91. 565 | 120. 48 |
| 100. 58 | 92. 50646 | 121. 31 | 91. 557 | 120. 65 |
| 100. 75 | 92. 48096 | 121. 47 | 91. 545 | 120. 81 |
| 100. 91 | 92. 45716 | 121. 64 | 91. 53  | 120. 98 |
| 101. 08 | 92. 43166 | 121. 81 | 91. 515 | 121. 15 |
| 101. 25 | 92. 40786 | 121. 98 | 91. 51  | 121. 31 |
| 101. 42 | 92. 39086 | 122. 14 | 91. 502 | 121. 48 |
| 101. 58 | 92. 36196 | 122. 31 | 91. 492 | 121. 65 |
| 101. 75 | 92. 34326 | 122. 48 | 91. 482 | 121. 81 |
| 101. 92 | 92. 31096 | 122. 65 | 91. 462 | 121. 98 |
| 102. 08 | 92. 28206 | 122. 81 | 91. 455 | 122. 15 |
| 102. 25 | 92. 25826 | 122. 98 | 91. 442 | 122. 31 |
| 102. 42 | 92. 23786 | 123. 15 | 91. 432 | 122. 48 |
| 102. 58 | 92. 21746 | 123. 31 | 91. 417 | 122. 65 |
| 102. 75 | 92. 18856 | 123. 48 | 91. 405 | 122. 81 |
| 102. 92 | 92. 16646 | 123. 65 | 91. 397 | 122. 98 |
| 103. 08 | 92. 14946 | 123. 82 | 91. 39  | 123. 15 |
| 103. 25 | 92. 11376 | 123. 98 | 91. 385 | 123. 31 |
| 103. 42 | 92. 09676 | 124. 15 | 91. 365 | 123. 48 |
| 103. 58 | 92. 07466 | 124. 32 | 91. 348 | 123. 65 |
| 103. 75 | 92. 05596 | 124. 49 | 91. 333 | 123. 81 |
| 103. 92 | 92. 02706 | 124. 65 | 91. 33  | 123. 98 |
| 104. 08 | 92. 00156 | 124. 82 | 91. 32  | 124. 14 |
| 104. 25 | 91. 97606 | 124. 99 | 91. 31  | 124. 31 |
| 104. 42 | 91. 94716 | 125. 16 | 91. 3   | 124. 48 |
| 104. 58 | 91. 92166 | 125. 32 | 91. 288 | 124. 64 |
| 104. 75 | 91. 90466 | 125. 49 | 91. 278 | 124. 81 |
| 104. 92 | 91. 87576 | 125. 66 | 91. 268 | 124. 98 |
| 105. 09 | 91. 85367 | 125. 82 | 91. 258 | 125. 14 |
| 105. 25 | 91. 82477 | 125. 99 | 91. 25  | 125. 31 |
| 105. 42 | 91. 81627 | 126. 16 | 91. 24  | 125. 48 |
| 105. 59 | 91. 78567 | 126. 33 | 91. 228 | 125. 64 |
| 105. 75 | 91. 76187 | 126. 49 | 91. 215 | 125. 81 |
| 105. 92 | 91. 74827 | 126. 66 | 91. 205 | 125. 97 |
| 106. 09 | 91. 70917 | 126. 83 | 91. 195 | 126. 14 |
| 106. 25 | 91. 68707 | 126. 99 | 91. 185 | 126. 31 |
| 106. 42 | 91. 66497 | 127. 16 | 91. 178 | 126. 47 |
| 106. 59 | 91. 64457 | 127. 33 | 91. 17  | 126. 64 |
| 106. 75 | 91. 62077 | 127. 5  | 91. 163 | 126. 81 |
| 106. 92 | 91. 60037 | 127. 66 | 91. 153 | 126. 97 |
| 107. 09 | 91. 56637 | 127. 83 | 91. 138 | 127. 14 |

|        |          |        |        |        |
|--------|----------|--------|--------|--------|
| 107.25 | 91.54767 | 128    | 91.128 | 127.3  |
| 107.42 | 91.52387 | 128.16 | 91.115 | 127.47 |
| 107.59 | 91.49157 | 128.33 | 91.11  | 127.64 |
| 107.75 | 91.47117 | 128.5  | 91.1   | 127.8  |
| 107.92 | 91.44737 | 128.66 | 91.088 | 127.97 |
| 108.09 | 91.41847 | 128.83 | 91.075 | 128.14 |
| 108.25 | 91.40487 | 129    | 91.065 | 128.3  |
| 108.42 | 91.37427 | 129.17 | 91.055 | 128.47 |
| 108.59 | 91.34877 | 129.33 | 91.045 | 128.64 |
| 108.75 | 91.33007 | 129.5  | 91.033 | 128.8  |
| 108.92 | 91.30457 | 129.67 | 91.026 | 128.97 |
| 109.09 | 91.28077 | 129.83 | 91.016 | 129.13 |
| 109.25 | 91.25867 | 130    | 91.011 | 129.3  |
| 109.42 | 91.21787 | 130.17 | 91.001 | 129.47 |
| 109.59 | 91.20597 | 130.33 | 90.991 | 129.63 |
| 109.75 | 91.18047 | 130.5  | 90.983 | 129.8  |
| 109.92 | 91.15837 | 130.67 | 90.973 | 129.97 |
| 110.09 | 91.13287 | 130.83 | 90.966 | 130.13 |
| 110.25 | 91.10567 | 131    | 90.956 | 130.3  |
| 110.42 | 91.08527 | 131.17 | 90.946 | 130.46 |
| 110.59 | 91.06147 | 131.33 | 90.936 | 130.63 |
| 110.75 | 91.03767 | 131.5  | 90.928 | 130.8  |
| 110.92 | 91.01557 | 131.67 | 90.918 | 130.96 |
| 111.09 | 90.98837 | 131.84 | 90.908 | 131.13 |
| 111.25 | 90.95947 | 132    | 90.903 | 131.29 |
| 111.42 | 90.93397 | 132.17 | 90.893 | 131.46 |
| 111.59 | 90.91357 | 132.34 | 90.886 | 131.63 |
| 111.75 | 90.89827 | 132.5  | 90.878 | 131.79 |
| 111.92 | 90.86767 | 132.67 | 90.868 | 131.96 |
| 112.09 | 90.84897 | 132.84 | 90.858 | 132.12 |
| 112.25 | 90.82177 | 133    | 90.848 | 132.29 |
| 112.42 | 90.79627 | 133.17 | 90.836 | 132.46 |
| 112.58 | 90.77417 | 133.34 | 90.826 | 132.62 |
| 112.75 | 90.75377 | 133.5  | 90.813 | 132.79 |
| 112.92 | 90.73507 | 133.67 | 90.803 | 132.96 |
| 113.08 | 90.70957 | 133.84 | 90.801 | 133.12 |
| 113.25 | 90.67897 | 134    | 90.796 | 133.29 |
| 113.42 | 90.65687 | 134.17 | 90.791 | 133.45 |
| 113.58 | 90.63817 | 134.34 | 90.776 | 133.62 |
| 113.75 | 90.60928 | 134.5  | 90.768 | 133.79 |
| 113.92 | 90.58548 | 134.67 | 90.758 | 133.95 |
| 114.08 | 90.56168 | 134.84 | 90.753 | 134.12 |
| 114.25 | 90.53278 | 135    | 90.741 | 134.28 |
| 114.42 | 90.51408 | 135.17 | 90.736 | 134.45 |
| 114.58 | 90.48518 | 135.34 | 90.721 | 134.62 |
| 114.75 | 90.46138 | 135.5  | 90.713 | 134.78 |
| 114.91 | 90.43758 | 135.66 | 90.708 | 134.95 |
| 115.08 | 90.42228 | 135.82 | 90.701 | 135.11 |
| 115.25 | 90.39338 | 135.98 | 90.696 | 135.28 |
| 115.41 | 90.36278 | 136.14 | 90.689 | 135.45 |
| 115.58 | 90.34408 | 136.3  | 90.681 | 135.61 |
| 115.75 | 90.31858 | 136.46 | 90.676 | 135.77 |
| 115.91 | 90.29818 | 136.63 | 90.671 | 135.93 |
| 116.08 | 90.27608 | 136.79 | 90.661 | 136.08 |

|         |           |         |         |         |
|---------|-----------|---------|---------|---------|
| 116. 25 | 90. 24548 | 136. 96 | 90. 649 | 136. 24 |
| 116. 41 | 90. 22168 | 137. 14 | 90. 634 | 136. 4  |
| 116. 58 | 90. 19788 | 137. 31 | 90. 624 | 136. 56 |
| 116. 74 | 90. 17748 | 137. 48 | 90. 619 | 136. 73 |
| 116. 91 | 90. 15368 | 137. 65 | 90. 609 | 136. 9  |
| 117. 08 | 90. 13498 | 137. 82 | 90. 599 | 137. 07 |
| 117. 24 | 90. 10778 | 137. 99 | 90. 591 | 137. 24 |
| 117. 41 | 90. 08058 | 138. 16 | 90. 586 | 137. 41 |
| 117. 58 | 90. 06018 | 138. 33 | 90. 579 | 137. 58 |
| 117. 74 | 90. 02788 | 138. 49 | 90. 571 | 137. 75 |
| 117. 91 | 90. 01088 | 138. 66 | 90. 561 | 137. 92 |
| 118. 07 | 89. 99048 | 138. 83 | 90. 554 | 138. 09 |
| 118. 24 | 89. 97178 | 139     | 90. 544 | 138. 26 |
| 118. 41 | 89. 94458 | 139. 16 | 90. 536 | 138. 42 |
| 118. 57 | 89. 91908 | 139. 33 | 90. 529 | 138. 59 |
| 118. 74 | 89. 90038 | 139. 5  | 90. 524 | 138. 76 |
| 118. 91 | 89. 88508 | 139. 67 | 90. 514 | 138. 92 |
| 119. 07 | 89. 85618 | 139. 83 | 90. 504 | 139. 09 |
| 119. 24 | 89. 83578 | 140     | 90. 494 | 139. 26 |
| 119. 4  | 89. 80858 | 140. 17 | 90. 486 | 139. 42 |
| 119. 57 | 89. 77798 | 140. 34 | 90. 481 | 139. 59 |
| 119. 74 | 89. 76268 | 140. 51 | 90. 471 | 139. 76 |
| 119. 9  | 89. 73888 | 140. 67 | 90. 464 | 139. 93 |
| 120. 07 | 89. 72358 | 140. 84 | 90. 454 | 140. 09 |
| 120. 23 | 89. 69808 | 141. 01 | 90. 449 | 140. 26 |
| 120. 4  | 89. 67258 | 141. 18 | 90. 434 | 140. 43 |
| 120. 57 | 89. 64368 | 141. 35 | 90. 429 | 140. 6  |
| 120. 73 | 89. 62668 | 141. 52 | 90. 419 | 140. 76 |
| 120. 9  | 89. 59608 | 141. 68 | 90. 419 | 140. 93 |
| 121. 06 | 89. 57568 | 141. 85 | 90. 409 | 141. 1  |
| 121. 23 | 89. 55018 | 142. 02 | 90. 399 | 141. 27 |
| 121. 4  | 89. 52808 | 142. 19 | 90. 389 | 141. 43 |
| 121. 56 | 89. 50768 | 142. 36 | 90. 381 | 141. 6  |
| 121. 73 | 89. 48218 | 142. 53 | 90. 376 | 141. 77 |
| 121. 9  | 89. 46518 | 142. 7  | 90. 366 | 141. 94 |
| 122. 06 | 89. 43798 | 142. 87 | 90. 361 | 142. 11 |
| 122. 23 | 89. 41928 | 143. 04 | 90. 351 | 142. 27 |
| 122. 39 | 89. 40058 | 143. 2  | 90. 344 | 142. 44 |
| 122. 56 | 89. 36829 | 143. 37 | 90. 342 | 142. 61 |
| 122. 73 | 89. 34619 | 143. 54 | 90. 332 | 142. 78 |
| 122. 89 | 89. 32579 | 143. 71 | 90. 322 | 142. 95 |
| 123. 06 | 89. 30709 | 143. 88 | 90. 312 | 143. 12 |
| 123. 22 | 89. 28159 | 144. 05 | 90. 307 | 143. 28 |
| 123. 39 | 89. 26289 | 144. 22 | 90. 302 | 143. 45 |
| 123. 56 | 89. 23229 | 144. 39 | 90. 294 | 143. 62 |
| 123. 72 | 89. 21189 | 144. 56 | 90. 282 | 143. 79 |
| 123. 89 | 89. 18639 | 144. 73 | 90. 274 | 143. 96 |
| 124. 05 | 89. 16769 | 144. 9  | 90. 264 | 144. 13 |
| 124. 22 | 89. 14729 | 145. 07 | 90. 257 | 144. 3  |
| 124. 39 | 89. 12179 | 145. 24 | 90. 254 | 144. 46 |
| 124. 55 | 89. 09969 | 145. 4  | 90. 244 | 144. 63 |
| 124. 72 | 89. 07419 | 145. 57 | 90. 239 | 144. 8  |
| 124. 88 | 89. 05549 | 145. 74 | 90. 232 | 144. 97 |
| 125. 05 | 89. 02829 | 145. 91 | 90. 227 | 145. 14 |

|        |          |        |        |        |
|--------|----------|--------|--------|--------|
| 125.22 | 89.01469 | 146.08 | 90.222 | 145.31 |
| 125.38 | 88.99089 | 146.25 | 90.214 | 145.48 |
| 125.55 | 88.96539 | 146.42 | 90.207 | 145.65 |
| 125.71 | 88.94669 | 146.59 | 90.197 | 145.81 |
| 125.88 | 88.92289 | 146.76 | 90.187 | 145.98 |
| 126.04 | 88.90079 | 146.93 | 90.182 | 146.15 |
| 126.21 | 88.88209 | 147.1  | 90.172 | 146.32 |
| 126.38 | 88.86169 | 147.27 | 90.164 | 146.49 |
| 126.54 | 88.83449 | 147.44 | 90.157 | 146.66 |
| 126.71 | 88.80899 | 147.61 | 90.152 | 146.83 |
| 126.87 | 88.78689 | 147.78 | 90.147 | 147    |
| 127.04 | 88.76309 | 147.95 | 90.139 | 147.17 |
| 127.21 | 88.74269 | 148.12 | 90.127 | 147.34 |
| 127.37 | 88.72569 | 148.29 | 90.122 | 147.5  |
| 127.54 | 88.70359 | 148.45 | 90.114 | 147.67 |
| 127.7  | 88.68659 | 148.62 | 90.109 | 147.84 |
| 127.87 | 88.65769 | 148.79 | 90.107 | 148.01 |
| 128.03 | 88.63559 | 148.96 | 90.099 | 148.18 |
| 128.2  | 88.61689 | 149.13 | 90.094 | 148.35 |
| 128.37 | 88.60329 | 149.3  | 90.087 | 148.52 |
| 128.53 | 88.56929 | 149.47 | 90.079 | 148.69 |
| 128.7  | 88.54379 | 149.64 | 90.069 | 148.86 |
| 128.86 | 88.51999 | 149.81 | 90.062 | 149.03 |
| 129.03 | 88.50469 | 149.98 | 90.057 | 149.2  |
| 129.19 | 88.47919 | 150.15 | 90.049 | 149.36 |
| 129.36 | 88.46049 | 150.32 | 90.042 | 149.53 |
| 129.53 | 88.43669 | 150.49 | 90.037 | 149.7  |
| 129.69 | 88.41119 | 150.66 | 90.034 | 149.87 |
| 129.86 | 88.39419 | 150.83 | 90.029 | 150.04 |
| 130.02 | 88.37379 | 151    | 90.022 | 150.21 |
| 130.19 | 88.34999 | 151.17 | 90.012 | 150.38 |
| 130.36 | 88.33979 | 151.34 | 90.004 | 150.55 |
| 130.52 | 88.31599 | 151.51 | 89.997 | 150.72 |
| 130.69 | 88.29389 | 151.68 | 89.992 | 150.89 |
| 130.85 | 88.25649 | 151.85 | 89.987 | 151.06 |
| 131.02 | 88.24459 | 152.02 | 89.98  | 151.22 |
| 131.18 | 88.22249 | 152.19 | 89.977 | 151.39 |
| 131.35 | 88.21059 | 152.36 | 89.972 | 151.56 |
| 131.52 | 88.18509 | 152.53 | 89.965 | 151.73 |
| 131.68 | 88.16469 | 152.69 | 89.957 | 151.9  |
| 131.85 | 88.13579 | 152.86 | 89.95  | 152.07 |
| 132.01 | 88.1171  | 153.03 | 89.942 | 152.24 |
| 132.18 | 88.0984  | 153.2  | 89.937 | 152.41 |
| 132.34 | 88.0797  | 153.37 | 89.935 | 152.58 |
| 132.51 | 88.0576  | 153.54 | 89.927 | 152.75 |
| 132.68 | 88.0406  | 153.71 | 89.92  | 152.92 |
| 132.84 | 88.0134  | 153.88 | 89.915 | 153.08 |
| 133.01 | 87.9981  | 154.05 | 89.907 | 153.25 |
| 133.17 | 87.9743  | 154.22 | 89.9   | 153.42 |
| 133.34 | 87.9539  | 154.39 | 89.895 | 153.59 |
| 133.5  | 87.925   | 154.56 | 89.885 | 153.76 |
| 133.67 | 87.9097  | 154.73 | 89.88  | 153.93 |
| 133.83 | 87.8876  | 154.9  | 89.872 | 154.1  |
| 134    | 87.8689  | 155.07 | 89.867 | 154.27 |

|         |           |         |         |         |
|---------|-----------|---------|---------|---------|
| 134. 17 | 87. 8468  | 155. 24 | 89. 862 | 154. 44 |
| 134. 33 | 87. 8366  | 155. 41 | 89. 857 | 154. 61 |
| 134. 5  | 87. 8145  | 155. 58 | 89. 852 | 154. 78 |
| 134. 66 | 87. 789   | 155. 75 | 89. 847 | 154. 94 |
| 134. 83 | 87. 772   | 155. 92 | 89. 842 | 155. 11 |
| 134. 99 | 87. 7431  | 156. 09 | 89. 837 | 155. 28 |
| 135. 16 | 87. 7227  | 156. 26 | 89. 83  | 155. 45 |
| 135. 33 | 87. 7108  | 156. 43 | 89. 822 | 155. 62 |
| 135. 49 | 87. 6921  | 156. 6  | 89. 817 | 155. 79 |
| 135. 65 | 87. 6751  | 156. 77 | 89. 81  | 155. 96 |
| 135. 81 | 87. 6496  | 156. 94 | 89. 805 | 156. 13 |
| 135. 97 | 87. 6258  | 157. 11 | 89. 802 | 156. 3  |
| 136. 13 | 87. 6105  | 157. 28 | 89. 797 | 156. 47 |
| 136. 28 | 87. 5986  | 157. 45 | 89. 792 | 156. 64 |
| 136. 44 | 87. 5714  | 157. 62 | 89. 787 | 156. 81 |
| 136. 61 | 87. 5544  | 157. 79 | 89. 782 | 156. 98 |
| 136. 77 | 87. 5357  | 157. 96 | 89. 777 | 157. 14 |
| 136. 94 | 87. 517   | 158. 12 | 89. 772 | 157. 31 |
| 137. 11 | 87. 4932  | 158. 29 | 89. 767 | 157. 48 |
| 137. 28 | 87. 4745  | 158. 46 | 89. 762 | 157. 65 |
| 137. 45 | 87. 4507  | 158. 63 | 89. 757 | 157. 82 |
| 137. 62 | 87. 4337  | 158. 8  | 89. 752 | 157. 99 |
| 137. 79 | 87. 4133  | 158. 97 | 89. 747 | 158. 16 |
| 137. 96 | 87. 398   | 159. 14 | 89. 742 | 158. 33 |
| 138. 13 | 87. 3708  | 159. 31 | 89. 735 | 158. 5  |
| 138. 3  | 87. 3572  | 159. 48 | 89. 727 | 158. 67 |
| 138. 46 | 87. 3317  | 159. 65 | 89. 722 | 158. 83 |
| 138. 63 | 87. 3181  | 159. 82 | 89. 717 | 159     |
| 138. 79 | 87. 2943  | 159. 99 | 89. 715 | 159. 17 |
| 138. 96 | 87. 2739  | 160. 16 | 89. 707 | 159. 34 |
| 139. 13 | 87. 2535  | 160. 33 | 89. 705 | 159. 51 |
| 139. 29 | 87. 2416  | 160. 5  | 89. 697 | 159. 68 |
| 139. 46 | 87. 2161  | 160. 67 | 89. 695 | 159. 85 |
| 139. 63 | 87. 1991  | 160. 84 | 89. 687 | 160. 02 |
| 139. 79 | 87. 1821  | 161. 01 | 89. 682 | 160. 19 |
| 139. 96 | 87. 1617  | 161. 18 | 89. 677 | 160. 36 |
| 140. 13 | 87. 1379  | 161. 35 | 89. 672 | 160. 53 |
| 140. 3  | 87. 1226  | 161. 52 | 89. 67  | 160. 7  |
| 140. 46 | 87. 1056  | 161. 69 | 89. 665 | 160. 86 |
| 140. 63 | 87. 0852  | 161. 86 | 89. 66  | 161. 03 |
| 140. 8  | 87. 0597  | 162. 03 | 89. 655 | 161. 2  |
| 140. 96 | 87. 0461  | 162. 2  | 89. 65  | 161. 37 |
| 141. 13 | 87. 0274  | 162. 37 | 89. 645 | 161. 54 |
| 141. 3  | 87. 0104  | 162. 54 | 89. 643 | 161. 71 |
| 141. 46 | 86. 99    | 162. 71 | 89. 638 | 161. 88 |
| 141. 63 | 86. 9679  | 162. 88 | 89. 635 | 162. 05 |
| 141. 8  | 86. 9458  | 163. 05 | 89. 633 | 162. 22 |
| 141. 97 | 86. 9305  | 163. 21 | 89. 628 | 162. 39 |
| 142. 14 | 86. 9152  | 163. 38 | 89. 625 | 162. 56 |
| 142. 3  | 86. 8914  | 163. 55 | 89. 623 | 162. 73 |
| 142. 47 | 86. 87271 | 163. 72 | 89. 615 | 162. 89 |
| 142. 64 | 86. 85741 | 163. 89 | 89. 608 | 163. 06 |
| 142. 81 | 86. 83871 | 164. 06 | 89. 6   | 163. 23 |
| 142. 97 | 86. 82511 | 164. 23 | 89. 598 | 163. 4  |

|         |           |         |         |         |
|---------|-----------|---------|---------|---------|
| 143. 14 | 86. 80301 | 164. 4  | 89. 59  | 163. 57 |
| 143. 31 | 86. 79281 | 164. 57 | 89. 585 | 163. 74 |
| 143. 48 | 86. 76391 | 164. 74 | 89. 58  | 163. 91 |
| 143. 65 | 86. 74521 | 164. 91 | 89. 575 | 164. 08 |
| 143. 81 | 86. 72311 | 165. 08 | 89. 57  | 164. 25 |
| 143. 98 | 86. 71291 | 165. 25 | 89. 565 | 164. 42 |
| 144. 15 | 86. 69081 | 165. 42 | 89. 56  | 164. 59 |
| 144. 32 | 86. 67721 | 165. 59 | 89. 555 | 164. 76 |
| 144. 49 | 86. 65851 | 165. 76 | 89. 55  | 164. 92 |
| 144. 65 | 86. 63641 | 165. 93 | 89. 545 | 165. 09 |
| 144. 82 | 86. 61941 | 166. 1  | 89. 54  | 165. 26 |
| 144. 99 | 86. 60071 | 166. 27 | 89. 535 | 165. 43 |
| 145. 16 | 86. 58031 | 166. 44 | 89. 53  | 165. 6  |
| 145. 33 | 86. 57181 | 166. 61 | 89. 525 | 165. 77 |
| 145. 49 | 86. 55141 | 166. 78 | 89. 523 | 165. 94 |
| 145. 66 | 86. 52931 | 166. 95 | 89. 518 | 166. 11 |
| 145. 83 | 86. 50891 | 167. 12 | 89. 513 | 166. 28 |
| 146     | 86. 49191 | 167. 29 | 89. 508 | 166. 45 |
| 146. 17 | 86. 47661 | 167. 46 | 89. 505 | 166. 62 |
| 146. 34 | 86. 46131 | 167. 63 | 89. 5   | 166. 78 |
| 146. 5  | 86. 44091 | 167. 79 | 89. 495 | 166. 95 |
| 146. 67 | 86. 42051 | 167. 96 | 89. 49  | 167. 12 |
| 146. 84 | 86. 40181 | 168. 13 | 89. 485 | 167. 29 |
| 147. 01 | 86. 39161 | 168. 3  | 89. 478 | 167. 46 |
| 147. 18 | 86. 37461 | 168. 47 | 89. 475 | 167. 63 |
| 147. 35 | 86. 35931 | 168. 64 | 89. 468 | 167. 8  |
| 147. 51 | 86. 33381 | 168. 81 | 89. 463 | 167. 97 |
| 147. 68 | 86. 32021 | 168. 98 | 89. 458 | 168. 14 |
| 147. 85 | 86. 30321 | 169. 15 | 89. 453 | 168. 31 |
| 148. 02 | 86. 28451 | 169. 32 | 89. 45  | 168. 48 |
| 148. 19 | 86. 27261 | 169. 49 | 89. 443 | 168. 64 |
| 148. 36 | 86. 24711 | 169. 66 | 89. 44  | 168. 81 |
| 148. 52 | 86. 23181 | 169. 83 | 89. 433 | 168. 98 |
| 148. 69 | 86. 21311 | 170     | 89. 428 | 169. 15 |
| 148. 86 | 86. 20121 | 170. 17 | 89. 42  | 169. 32 |
| 149. 03 | 86. 18931 | 170. 34 | 89. 418 | 169. 49 |
| 149. 2  | 86. 16721 | 170. 51 | 89. 413 | 169. 66 |
| 149. 37 | 86. 14851 | 170. 68 | 89. 41  | 169. 83 |
| 149. 54 | 86. 13661 | 170. 85 | 89. 408 | 170     |
| 149. 7  | 86. 12471 | 171. 02 | 89. 403 | 170. 17 |
| 149. 87 | 86. 10601 | 171. 19 | 89. 4   | 170. 34 |
| 150. 04 | 86. 09241 | 171. 36 | 89. 395 | 170. 5  |
| 150. 21 | 86. 07031 | 171. 53 | 89. 395 | 170. 67 |
| 150. 38 | 86. 05671 | 171. 7  | 89. 388 | 170. 84 |
| 150. 55 | 86. 03801 | 171. 87 | 89. 385 | 171. 01 |
| 150. 71 | 86. 02101 | 172. 04 | 89. 383 | 171. 18 |
| 150. 88 | 86. 01251 | 172. 21 | 89. 378 | 171. 35 |
| 151. 05 | 85. 99891 | 172. 38 | 89. 373 | 171. 52 |
| 151. 22 | 85. 97681 | 172. 55 | 89. 368 | 171. 69 |
| 151. 39 | 85. 96151 | 172. 72 | 89. 363 | 171. 86 |
| 151. 56 | 85. 94281 | 172. 89 | 89. 36  | 172. 03 |
| 151. 73 | 85. 92921 | 173. 05 | 89. 353 | 172. 2  |
| 151. 9  | 85. 91221 | 173. 22 | 89. 348 | 172. 37 |
| 152. 06 | 85. 90031 | 173. 39 | 89. 343 | 172. 53 |

|         |           |         |         |         |
|---------|-----------|---------|---------|---------|
| 152. 23 | 85. 88501 | 173. 56 | 89. 338 | 172. 7  |
| 152. 4  | 85. 86461 | 173. 73 | 89. 335 | 172. 87 |
| 152. 57 | 85. 84591 | 173. 9  | 89. 328 | 173. 04 |
| 152. 74 | 85. 83401 | 174. 07 | 89. 323 | 173. 21 |
| 152. 91 | 85. 82551 | 174. 24 | 89. 315 | 173. 38 |
| 153. 08 | 85. 81021 | 174. 41 | 89. 313 | 173. 55 |
| 153. 25 | 85. 78981 | 174. 58 | 89. 306 | 173. 72 |
| 153. 41 | 85. 77961 | 174. 75 | 89. 301 | 173. 89 |
| 153. 58 | 85. 75751 | 174. 92 | 89. 296 | 174. 06 |
| 153. 75 | 85. 74051 | 175. 09 | 89. 291 | 174. 23 |
| 153. 92 | 85. 72691 | 175. 26 | 89. 288 | 174. 4  |
| 154. 09 | 85. 71161 | 175. 43 | 89. 286 | 174. 56 |
| 154. 26 | 85. 69631 | 175. 6  | 89. 281 | 174. 73 |
| 154. 43 | 85. 67591 | 175. 77 | 89. 276 | 174. 9  |
| 154. 59 | 85. 66061 | 175. 94 | 89. 271 | 175. 07 |
| 154. 76 | 85. 64701 | 176. 11 | 89. 263 | 175. 24 |
| 154. 93 | 85. 63511 | 176. 28 | 89. 258 | 175. 41 |
| 155. 1  | 85. 61812 | 176. 45 | 89. 256 | 175. 58 |
| 155. 27 | 85. 60962 | 176. 62 | 89. 248 | 175. 75 |
| 155. 44 | 85. 60112 | 176. 79 | 89. 243 | 175. 92 |
| 155. 61 | 85. 57902 | 176. 96 | 89. 241 | 176. 09 |
| 155. 77 | 85. 56372 | 177. 13 | 89. 236 | 176. 26 |
| 155. 94 | 85. 55012 | 177. 3  | 89. 231 | 176. 43 |
| 156. 11 | 85. 54162 | 177. 47 | 89. 223 | 176. 6  |
| 156. 28 | 85. 52462 | 177. 64 | 89. 221 | 176. 76 |
| 156. 45 | 85. 51102 | 177. 81 | 89. 216 | 176. 93 |
| 156. 62 | 85. 49232 | 177. 98 | 89. 211 | 177. 1  |
| 156. 79 | 85. 47872 | 178. 15 | 89. 203 | 177. 27 |
| 156. 95 | 85. 46342 | 178. 32 | 89. 201 | 177. 44 |
| 157. 12 | 85. 45322 | 178. 49 | 89. 196 | 177. 61 |
| 157. 29 | 85. 43962 | 178. 66 | 89. 191 | 177. 78 |
| 157. 46 | 85. 42092 | 178. 83 | 89. 186 | 177. 95 |
| 157. 63 | 85. 40562 | 179     | 89. 181 | 178. 12 |
| 157. 8  | 85. 39712 | 179. 17 | 89. 176 | 178. 29 |
| 157. 97 | 85. 38522 | 179. 34 | 89. 173 | 178. 46 |
| 158. 13 | 85. 37502 | 179. 51 | 89. 166 | 178. 63 |
| 158. 3  | 85. 36312 | 179. 68 | 89. 163 | 178. 8  |
| 158. 47 | 85. 34782 | 179. 85 | 89. 156 | 178. 96 |
| 158. 64 | 85. 32402 | 180. 01 | 89. 151 | 179. 13 |
| 158. 81 | 85. 31042 | 180. 18 | 89. 146 | 179. 3  |
| 158. 98 | 85. 30022 | 180. 35 | 89. 141 | 179. 47 |
| 159. 15 | 85. 29002 | 180. 52 | 89. 136 | 179. 64 |
| 159. 32 | 85. 27642 | 180. 69 | 89. 133 | 179. 81 |
| 159. 48 | 85. 26792 | 180. 86 | 89. 128 | 179. 98 |
| 159. 65 | 85. 25262 | 181. 03 | 89. 121 | 180. 15 |
| 159. 82 | 85. 23902 | 181. 2  | 89. 116 | 180. 32 |
| 159. 99 | 85. 22882 | 181. 37 | 89. 111 | 180. 49 |
| 160. 16 | 85. 21862 | 181. 54 | 89. 103 | 180. 66 |
| 160. 33 | 85. 20502 | 181. 71 | 89. 098 | 180. 83 |
| 160. 5  | 85. 19312 | 181. 88 | 89. 096 | 181     |
| 160. 67 | 85. 18292 | 182. 05 | 89. 093 | 181. 16 |
| 160. 83 | 85. 16592 | 182. 22 | 89. 086 | 181. 33 |
| 161     | 85. 15232 | 182. 39 | 89. 081 | 181. 5  |
| 161. 17 | 85. 14212 | 182. 56 | 89. 076 | 181. 67 |



|        |          |        |        |        |
|--------|----------|--------|--------|--------|
| 161.34 | 85.13022 | 182.73 | 89.068 | 181.84 |
| 161.51 | 85.11662 | 182.9  | 89.063 | 182.01 |
| 161.68 | 85.10472 | 183.07 | 89.056 | 182.18 |
| 161.85 | 85.08432 | 183.24 | 89.053 | 182.35 |
| 162.02 | 85.07242 | 183.41 | 89.048 | 182.52 |
| 162.18 | 85.06222 | 183.58 | 89.041 | 182.69 |
| 162.35 | 85.05032 | 183.75 | 89.038 | 182.86 |
| 162.52 | 85.03332 | 183.92 | 89.031 | 183.03 |
| 162.69 | 85.01972 | 184.09 | 89.028 | 183.2  |
| 162.86 | 85.00952 | 184.26 | 89.021 | 183.37 |
| 163.03 | 84.99762 | 184.43 | 89.013 | 183.54 |
| 163.2  | 84.98572 | 184.6  | 89.008 | 183.71 |
| 163.37 | 84.97212 | 184.77 | 89.003 | 183.87 |
| 163.53 | 84.95682 | 184.94 | 88.998 | 184.04 |
| 163.7  | 84.95002 | 185.11 | 88.993 | 184.21 |
| 163.87 | 84.94322 | 185.28 | 88.986 | 184.38 |
| 164.04 | 84.93132 | 185.45 | 88.983 | 184.55 |
| 164.21 | 84.92112 | 185.62 | 88.976 | 184.72 |
| 164.38 | 84.91262 | 185.79 | 88.966 | 184.89 |
| 164.55 | 84.90922 | 185.96 | 88.961 | 185.06 |
| 164.71 | 84.89732 | 186.13 | 88.956 | 185.23 |
| 164.88 | 84.88032 | 186.3  | 88.949 | 185.4  |
| 165.05 | 84.87012 | 186.47 | 88.944 | 185.57 |
| 165.22 | 84.85142 | 186.64 | 88.936 | 185.74 |
| 165.39 | 84.84462 | 186.81 | 88.934 | 185.91 |
| 165.56 | 84.83952 | 186.98 | 88.926 | 186.08 |
| 165.73 | 84.82592 | 187.15 | 88.919 | 186.25 |
| 165.9  | 84.81572 | 187.32 | 88.911 | 186.42 |
| 166.06 | 84.80212 | 187.49 | 88.904 | 186.59 |
| 166.23 | 84.79362 | 187.66 | 88.896 | 186.76 |
| 166.4  | 84.78002 | 187.83 | 88.891 | 186.92 |
| 166.57 | 84.76642 | 188    | 88.884 | 187.09 |
| 166.74 | 84.75112 | 188.17 | 88.876 | 187.26 |
| 166.91 | 84.74432 | 188.34 | 88.871 | 187.43 |
| 167.08 | 84.73582 | 188.51 | 88.866 | 187.6  |
| 167.25 | 84.72222 | 188.68 | 88.859 | 187.77 |
| 167.41 | 84.71032 | 188.85 | 88.844 | 187.94 |
| 167.58 | 84.70182 | 189.02 | 88.839 | 188.11 |
| 167.75 | 84.68992 | 189.19 | 88.831 | 188.28 |
| 167.92 | 84.67972 | 189.36 | 88.826 | 188.45 |
| 168.09 | 84.67122 | 189.53 | 88.821 | 188.62 |
| 168.26 | 84.65932 | 189.7  | 88.814 | 188.79 |
| 168.43 | 84.65082 | 189.87 | 88.809 | 188.96 |
| 168.59 | 84.63892 | 190.04 | 88.801 | 189.13 |
| 168.76 | 84.62872 | 190.21 | 88.794 | 189.3  |
| 168.93 | 84.61852 | 190.38 | 88.784 | 189.47 |
| 169.1  | 84.60832 | 190.55 | 88.779 | 189.64 |
| 169.27 | 84.59812 | 190.72 | 88.771 | 189.81 |
| 169.44 | 84.58792 | 190.89 | 88.769 | 189.98 |
| 169.61 | 84.57942 | 191.06 | 88.764 | 190.14 |
| 169.78 | 84.56752 | 191.23 | 88.761 | 190.31 |
| 169.95 | 84.55392 | 191.4  | 88.756 | 190.48 |
| 170.11 | 84.54542 | 191.57 | 88.749 | 190.65 |
| 170.28 | 84.54032 | 191.74 | 88.739 | 190.82 |

|         |           |         |         |         |
|---------|-----------|---------|---------|---------|
| 170. 45 | 84. 53182 | 191. 91 | 88. 734 | 190. 99 |
| 170. 62 | 84. 51482 | 192. 08 | 88. 726 | 191. 16 |
| 170. 79 | 84. 50122 | 192. 25 | 88. 716 | 191. 33 |
| 170. 96 | 84. 49102 | 192. 42 | 88. 706 | 191. 5  |
| 171. 13 | 84. 48762 | 192. 59 | 88. 699 | 191. 67 |
| 171. 3  | 84. 48082 | 192. 76 | 88. 691 | 191. 84 |
| 171. 47 | 84. 47062 | 192. 93 | 88. 684 | 192. 01 |
| 171. 63 | 84. 46042 | 193. 1  | 88. 676 | 192. 18 |
| 171. 8  | 84. 45192 | 193. 27 | 88. 669 | 192. 35 |
| 171. 97 | 84. 44172 | 193. 44 | 88. 661 | 192. 52 |
| 172. 14 | 84. 43832 | 193. 61 | 88. 656 | 192. 69 |
| 172. 31 | 84. 42472 | 193. 78 | 88. 649 | 192. 86 |
| 172. 48 | 84. 41622 | 193. 95 | 88. 639 | 193. 03 |
| 172. 65 | 84. 40432 | 194. 12 | 88. 631 | 193. 2  |
| 172. 82 | 84. 39582 | 194. 29 | 88. 624 | 193. 37 |
| 172. 99 | 84. 38732 | 194. 46 | 88. 617 | 193. 54 |
| 173. 16 | 84. 37882 | 194. 63 | 88. 609 | 193. 71 |
| 173. 32 | 84. 36863 | 194. 8  | 88. 602 | 193. 88 |
| 173. 49 | 84. 36013 | 194. 97 | 88. 594 | 194. 05 |
| 173. 66 | 84. 34993 | 195. 14 | 88. 584 | 194. 22 |
| 173. 83 | 84. 33973 | 195. 31 | 88. 572 | 194. 39 |
| 174     | 84. 33123 | 195. 48 | 88. 567 | 194. 56 |
| 174. 17 | 84. 32273 | 195. 65 | 88. 562 | 194. 73 |
| 174. 34 | 84. 31593 | 195. 82 | 88. 552 | 194. 9  |
| 174. 51 | 84. 30573 | 195. 99 | 88. 549 | 195. 07 |
| 174. 67 | 84. 29723 | 196. 16 | 88. 542 | 195. 24 |
| 174. 84 | 84. 28703 | 196. 33 | 88. 529 | 195. 41 |
| 175. 01 | 84. 27683 | 196. 5  | 88. 524 | 195. 58 |
| 175. 18 | 84. 27003 | 196. 67 | 88. 514 | 195. 75 |
| 175. 35 | 84. 25983 | 196. 84 | 88. 504 | 195. 92 |
| 175. 52 | 84. 25133 | 197. 01 | 88. 499 | 196. 09 |
| 175. 69 | 84. 24623 | 197. 18 | 88. 487 | 196. 26 |
| 175. 86 | 84. 23773 | 197. 35 | 88. 482 | 196. 43 |
| 176. 03 | 84. 22923 | 197. 52 | 88. 472 | 196. 6  |
| 176. 2  | 84. 22243 | 197. 69 | 88. 459 | 196. 77 |
| 176. 36 | 84. 21563 | 197. 86 | 88. 459 | 196. 94 |
| 176. 53 | 84. 20883 | 198. 04 | 88. 449 | 197. 11 |
| 176. 7  | 84. 19693 | 198. 21 | 88. 442 | 197. 28 |
| 176. 87 | 84. 18843 | 198. 38 | 88. 434 | 197. 45 |
| 177. 04 | 84. 17993 | 198. 55 | 88. 427 | 197. 62 |
| 177. 21 | 84. 17143 | 198. 72 | 88. 419 | 197. 79 |
| 177. 38 | 84. 16633 | 198. 89 | 88. 412 | 197. 96 |
| 177. 55 | 84. 15953 | 199. 06 | 88. 407 | 198. 12 |
| 177. 72 | 84. 15273 | 199. 23 | 88. 392 | 198. 29 |
| 177. 89 | 84. 14423 | 199. 4  | 88. 389 | 198. 46 |
| 178. 06 | 84. 13573 | 199. 57 | 88. 382 | 198. 63 |
| 178. 22 | 84. 12893 | 199. 74 | 88. 377 | 198. 8  |
| 178. 39 | 84. 12043 | 199. 91 | 88. 367 | 198. 97 |
| 178. 56 | 84. 11363 | 200. 08 | 88. 354 | 199. 14 |
| 178. 73 | 84. 10343 | 200. 25 | 88. 344 | 199. 31 |
| 178. 9  | 84. 10003 | 200. 42 | 88. 339 | 199. 48 |
| 179. 07 | 84. 09323 | 200. 59 | 88. 332 | 199. 65 |
| 179. 24 | 84. 08643 | 200. 76 | 88. 322 | 199. 82 |
| 179. 41 | 84. 07793 | 200. 93 | 88. 312 | 199. 99 |

|        |          |        |        |        |
|--------|----------|--------|--------|--------|
| 179.58 | 84.06773 | 201.1  | 88.302 | 200.16 |
| 179.75 | 84.06093 | 201.27 | 88.292 | 200.34 |
| 179.92 | 84.05413 | 201.44 | 88.284 | 200.51 |
| 180.09 | 84.04563 | 201.61 | 88.279 | 200.68 |
| 180.25 | 84.03543 | 201.78 | 88.275 | 200.85 |
| 180.42 | 84.03033 | 201.95 | 88.267 | 201.02 |
| 180.59 | 84.02523 | 202.12 | 88.26  | 201.19 |
| 180.76 | 84.01843 | 202.3  | 88.25  | 201.36 |
| 180.93 | 84.01163 | 202.47 | 88.24  | 201.53 |
| 181.1  | 84.00653 | 202.64 | 88.23  | 201.7  |
| 181.27 | 83.99973 | 202.81 | 88.222 | 201.87 |
| 181.44 | 83.99293 | 202.98 | 88.207 | 202.04 |
| 181.61 | 83.98613 | 203.15 | 88.197 | 202.21 |
| 181.78 | 83.97763 | 203.32 | 88.19  | 202.38 |
| 181.95 | 83.96913 | 203.49 | 88.18  | 202.55 |
| 182.11 | 83.95893 | 203.66 | 88.17  | 202.72 |
| 182.28 | 83.95723 | 203.83 | 88.162 | 202.89 |
| 182.45 | 83.95383 | 204    | 88.157 | 203.06 |
| 182.62 | 83.94873 | 204.17 | 88.152 | 203.23 |
| 182.79 | 83.93853 | 204.34 | 88.147 | 203.4  |
| 182.96 | 83.92833 | 204.51 | 88.14  | 203.57 |
| 183.13 | 83.92153 | 204.68 | 88.127 | 203.74 |
| 183.3  | 83.91643 | 204.85 | 88.12  | 203.91 |
| 183.47 | 83.91133 | 205.02 | 88.112 | 204.08 |
| 183.64 | 83.90793 | 205.19 | 88.102 | 204.25 |
| 183.8  | 83.90453 | 205.36 | 88.092 | 204.42 |
| 183.97 | 83.89603 | 205.53 | 88.085 | 204.59 |
| 184.14 | 83.88923 | 205.71 | 88.08  | 204.76 |
| 184.31 | 83.88243 | 205.88 | 88.07  | 204.93 |
| 184.48 | 83.87733 | 206.05 | 88.06  | 205.1  |
| 184.65 | 83.87223 | 206.22 | 88.05  | 205.27 |
| 184.82 | 83.86543 | 206.39 | 88.037 | 205.44 |
| 184.99 | 83.86033 | 206.56 | 88.035 | 205.61 |
| 185.16 | 83.85693 | 206.73 | 88.027 | 205.78 |
| 185.33 | 83.85013 | 206.9  | 88.025 | 205.95 |
| 185.5  | 83.84673 | 207.07 | 88.015 | 206.12 |
| 185.66 | 83.83993 | 207.24 | 88.007 | 206.29 |
| 185.83 | 83.83483 | 207.41 | 88.002 | 206.46 |
| 186    | 83.82803 | 207.58 | 87.995 | 206.63 |
| 186.17 | 83.82123 | 207.75 | 87.985 | 206.8  |
| 186.34 | 83.81443 | 207.92 | 87.972 | 206.97 |
| 186.51 | 83.80933 | 208.09 | 87.965 | 207.14 |
| 186.68 | 83.80423 | 208.26 | 87.955 | 207.32 |
| 186.85 | 83.80083 | 208.43 | 87.95  | 207.49 |
| 187.02 | 83.79403 | 208.6  | 87.94  | 207.66 |
| 187.19 | 83.78893 | 208.78 | 87.932 | 207.83 |
| 187.36 | 83.78553 | 208.95 | 87.92  | 208    |
| 187.53 | 83.78043 | 209.12 | 87.913 | 208.17 |
| 187.7  | 83.77533 | 209.29 | 87.903 | 208.34 |
| 187.86 | 83.76853 | 209.46 | 87.893 | 208.51 |
| 188.03 | 83.76513 | 209.63 | 87.88  | 208.68 |
| 188.2  | 83.76003 | 209.8  | 87.875 | 208.85 |
| 188.37 | 83.75153 | 209.97 | 87.868 | 209.02 |
| 188.54 | 83.74643 | 210.14 | 87.863 | 209.19 |

|         |           |         |         |         |
|---------|-----------|---------|---------|---------|
| 188. 71 | 83. 74303 | 210. 31 | 87. 858 | 209. 36 |
| 188. 88 | 83. 73623 | 210. 48 | 87. 848 | 209. 53 |
| 189. 05 | 83. 73113 | 210. 65 | 87. 84  | 209. 7  |
| 189. 22 | 83. 72773 | 210. 82 | 87. 833 | 209. 87 |
| 189. 39 | 83. 72093 | 210. 99 | 87. 825 | 210. 04 |
| 189. 56 | 83. 71753 | 211. 17 | 87. 815 | 210. 21 |
| 189. 73 | 83. 71413 | 211. 34 | 87. 808 | 210. 38 |
| 189. 9  | 83. 70903 | 211. 51 | 87. 795 | 210. 55 |
| 190. 07 | 83. 70563 | 211. 68 | 87. 788 | 210. 72 |
| 190. 24 | 83. 70053 | 211. 85 | 87. 778 | 210. 9  |
| 190. 41 | 83. 69543 | 212. 02 | 87. 768 | 211. 07 |
| 190. 58 | 83. 68863 | 212. 19 | 87. 763 | 211. 24 |
| 190. 75 | 83. 68353 | 212. 36 | 87. 755 | 211. 41 |
| 190. 91 | 83. 68013 | 212. 53 | 87. 748 | 211. 58 |
| 191. 08 | 83. 67673 | 212. 7  | 87. 735 | 211. 75 |
| 191. 25 | 83. 67333 | 212. 87 | 87. 725 | 211. 92 |
| 191. 42 | 83. 66993 | 213. 04 | 87. 715 | 212. 09 |
| 191. 59 | 83. 66653 | 213. 22 | 87. 705 | 212. 26 |
| 191. 76 | 83. 65973 | 213. 39 | 87. 7   | 212. 43 |
| 191. 93 | 83. 65463 | 213. 56 | 87. 69  | 212. 6  |
| 192. 1  | 83. 65123 | 213. 73 | 87. 68  | 212. 77 |
| 192. 27 | 83. 64613 | 213. 9  | 87. 668 | 212. 94 |
| 192. 44 | 83. 64103 | 214. 07 | 87. 658 | 213. 11 |
| 192. 61 | 83. 63593 | 214. 24 | 87. 648 | 213. 28 |
| 192. 78 | 83. 63253 | 214. 41 | 87. 643 | 213. 45 |
| 192. 95 | 83. 62743 | 214. 58 | 87. 633 | 213. 62 |
| 193. 12 | 83. 62403 | 214. 75 | 87. 628 | 213. 8  |
| 193. 29 | 83. 62233 | 214. 92 | 87. 613 | 213. 97 |
| 193. 46 | 83. 61723 | 215. 09 | 87. 605 | 214. 14 |
| 193. 63 | 83. 61383 | 215. 26 | 87. 595 | 214. 31 |
| 193. 8  | 83. 60873 | 215. 44 | 87. 588 | 214. 48 |
| 193. 97 | 83. 60533 | 215. 61 | 87. 583 | 214. 65 |
| 194. 14 | 83. 59853 | 215. 78 | 87. 578 | 214. 82 |
| 194. 31 | 83. 59513 | 215. 95 | 87. 571 | 214. 99 |
| 194. 48 | 83. 59003 | 216. 12 | 87. 563 | 215. 16 |
| 194. 65 | 83. 58833 | 216. 29 | 87. 551 | 215. 33 |
| 194. 82 | 83. 58323 | 216. 46 | 87. 536 | 215. 5  |
| 194. 99 | 83. 58153 | 216. 63 | 87. 523 | 215. 67 |
| 195. 16 | 83. 57643 | 216. 8  | 87. 511 | 215. 84 |
| 195. 32 | 83. 57473 | 216. 97 | 87. 503 | 216. 01 |
| 195. 49 | 83. 56793 | 217. 14 | 87. 496 | 216. 18 |
| 195. 66 | 83. 56453 | 217. 32 | 87. 486 | 216. 36 |
| 195. 83 | 83. 56283 | 217. 49 | 87. 476 | 216. 53 |
| 196     | 83. 55773 | 217. 66 | 87. 466 | 216. 7  |
| 196. 17 | 83. 55433 | 217. 83 | 87. 458 | 216. 87 |
| 196. 34 | 83. 54923 | 218     | 87. 448 | 217. 04 |
| 196. 51 | 83. 54753 | 218. 17 | 87. 438 | 217. 21 |
| 196. 68 | 83. 54413 | 218. 34 | 87. 428 | 217. 38 |
| 196. 85 | 83. 54073 | 218. 51 | 87. 416 | 217. 55 |
| 197. 02 | 83. 53733 | 218. 68 | 87. 408 | 217. 72 |
| 197. 19 | 83. 53563 | 218. 85 | 87. 393 | 217. 89 |
| 197. 36 | 83. 53393 | 219. 02 | 87. 381 | 218. 06 |
| 197. 53 | 83. 53223 | 219. 2  | 87. 373 | 218. 23 |
| 197. 7  | 83. 52713 | 219. 37 | 87. 363 | 218. 4  |

|         |           |         |         |         |
|---------|-----------|---------|---------|---------|
| 197. 87 | 83. 52373 | 219. 54 | 87. 356 | 218. 57 |
| 198. 04 | 83. 52203 | 219. 71 | 87. 343 | 218. 75 |
| 198. 21 | 83. 51863 | 219. 88 | 87. 333 | 218. 92 |
| 198. 38 | 83. 51693 | 220. 05 | 87. 318 | 219. 09 |
| 198. 55 | 83. 51013 | 220. 22 | 87. 308 | 219. 26 |
| 198. 72 | 83. 50843 | 220. 39 | 87. 301 | 219. 43 |
| 198. 89 | 83. 50673 | 220. 56 | 87. 293 | 219. 6  |
| 199. 06 | 83. 50333 | 220. 73 | 87. 278 | 219. 77 |
| 199. 23 | 83. 49993 | 220. 91 | 87. 266 | 219. 94 |
| 199. 4  | 83. 49653 | 221. 08 | 87. 256 | 220. 11 |
| 199. 57 | 83. 49313 | 221. 25 | 87. 248 | 220. 28 |
| 199. 74 | 83. 49143 | 221. 42 | 87. 234 | 220. 45 |
| 199. 91 | 83. 48973 | 221. 59 | 87. 226 | 220. 62 |
| 200. 08 | 83. 48633 | 221. 76 | 87. 216 | 220. 79 |
| 200. 25 | 83. 48463 | 221. 93 | 87. 209 | 220. 97 |
| 200. 42 | 83. 48293 | 222. 1  | 87. 199 | 221. 14 |
| 200. 59 | 83. 47953 | 222. 27 | 87. 189 | 221. 31 |
| 200. 76 | 83. 47783 | 222. 44 | 87. 179 | 221. 48 |
| 200. 92 | 83. 47443 | 222. 61 | 87. 166 | 221. 65 |
| 201. 09 | 83. 47103 | 222. 78 | 87. 159 | 221. 82 |
| 201. 26 | 83. 46763 | 222. 96 | 87. 144 | 221. 99 |
| 201. 43 | 83. 46423 | 223. 13 | 87. 126 | 222. 16 |
| 201. 6  | 83. 45913 | 223. 3  | 87. 109 | 222. 33 |
| 201. 77 | 83. 45743 | 223. 47 | 87. 101 | 222. 5  |
| 201. 94 | 83. 45403 | 223. 64 | 87. 089 | 222. 67 |
| 202. 11 | 83. 45063 | 223. 81 | 87. 081 | 222. 85 |
| 202. 28 | 83. 44723 | 223. 98 | 87. 069 | 223. 02 |
| 202. 45 | 83. 44383 | 224. 15 | 87. 056 | 223. 19 |
| 202. 62 | 83. 44043 | 224. 32 | 87. 046 | 223. 36 |
| 202. 79 | 83. 43873 | 224. 49 | 87. 041 | 223. 53 |
| 202. 96 | 83. 43703 | 224. 67 | 87. 026 | 223. 7  |
| 203. 13 | 83. 43193 | 224. 84 | 87. 021 | 223. 87 |
| 203. 3  | 83. 43193 | 225. 01 | 87. 006 | 224. 04 |
| 203. 47 | 83. 42853 | 225. 18 | 86. 996 | 224. 21 |
| 203. 64 | 83. 42683 | 225. 35 | 86. 979 | 224. 38 |
| 203. 81 | 83. 42513 | 225. 52 | 86. 974 | 224. 56 |
| 203. 98 | 83. 42173 | 225. 69 | 86. 959 | 224. 73 |
| 204. 15 | 83. 42003 | 225. 86 | 86. 956 | 224. 9  |
| 204. 32 | 83. 41663 | 226. 03 | 86. 944 | 225. 07 |
| 204. 49 | 83. 41323 | 226. 2  | 86. 931 | 225. 24 |
| 204. 66 | 83. 41153 | 226. 38 | 86. 919 | 225. 41 |
| 204. 83 | 83. 40813 | 226. 55 | 86. 899 | 225. 58 |
| 205     | 83. 40473 | 226. 72 | 86. 882 | 225. 75 |
| 205. 17 | 83. 40133 | 226. 89 | 86. 874 | 225. 92 |
| 205. 34 | 83. 39793 | 227. 06 | 86. 867 | 226. 09 |
| 205. 51 | 83. 39453 | 227. 23 | 86. 854 | 226. 27 |
| 205. 68 | 83. 39283 | 227. 4  | 86. 847 | 226. 44 |
| 205. 85 | 83. 39113 | 227. 57 | 86. 834 | 226. 61 |
| 206. 02 | 83. 38773 | 227. 74 | 86. 822 | 226. 78 |
| 206. 19 | 83. 38603 | 227. 91 | 86. 809 | 226. 95 |
| 206. 36 | 83. 38263 | 228. 09 | 86. 804 | 227. 12 |
| 206. 53 | 83. 38093 | 228. 26 | 86. 789 | 227. 29 |
| 206. 7  | 83. 37923 | 228. 43 | 86. 784 | 227. 46 |
| 206. 87 | 83. 37583 | 228. 6  | 86. 767 | 227. 63 |

|         |           |         |         |         |
|---------|-----------|---------|---------|---------|
| 207. 04 | 83. 37413 | 228. 77 | 86. 754 | 227. 8  |
| 207. 21 | 83. 37243 | 228. 94 | 86. 747 | 227. 98 |
| 207. 38 | 83. 37073 | 229. 11 | 86. 739 | 228. 15 |
| 207. 55 | 83. 36903 | 229. 28 | 86. 729 | 228. 32 |
| 207. 72 | 83. 36563 | 229. 45 | 86. 719 | 228. 49 |
| 207. 89 | 83. 36393 | 229. 62 | 86. 707 | 228. 66 |
| 208. 06 | 83. 36053 | 229. 8  | 86. 697 | 228. 83 |
| 208. 24 | 83. 35883 | 229. 97 | 86. 682 | 229     |
| 208. 41 | 83. 35713 | 230. 14 | 86. 674 | 229. 17 |
| 208. 58 | 83. 35373 | 230. 31 | 86. 667 | 229. 34 |
| 208. 75 | 83. 35033 | 230. 48 | 86. 654 | 229. 51 |
| 208. 92 | 83. 34863 | 230. 65 | 86. 644 | 229. 69 |
| 209. 09 | 83. 34693 | 230. 82 | 86. 632 | 229. 86 |
| 209. 26 | 83. 34353 | 230. 99 | 86. 612 | 230. 03 |
| 209. 43 | 83. 34353 | 231. 16 | 86. 602 | 230. 2  |
| 209. 6  | 83. 34013 | 231. 33 | 86. 592 | 230. 37 |
| 209. 77 | 83. 33843 | 231. 5  | 86. 587 | 230. 54 |
| 209. 94 | 83. 33503 | 231. 67 | 86. 572 | 230. 71 |
| 210. 11 | 83. 33333 | 231. 84 | 86. 557 | 230. 88 |
| 210. 28 | 83. 33163 | 232. 01 | 86. 55  | 231. 05 |
| 210. 45 | 83. 32823 | 232. 18 | 86. 532 | 231. 22 |
| 210. 62 | 83. 32483 | 232. 35 | 86. 53  | 231. 39 |
| 210. 79 | 83. 32313 | 232. 52 | 86. 515 | 231. 56 |
| 210. 96 | 83. 31973 | 232. 69 | 86. 5   | 231. 73 |
| 211. 13 | 83. 31463 | 232. 86 | 86. 487 | 231. 9  |
| 211. 3  | 83. 31293 | 233. 03 | 86. 477 | 232. 07 |
| 211. 47 | 83. 31123 | 233. 2  | 86. 46  | 232. 24 |
| 211. 64 | 83. 30783 | 233. 37 | 86. 445 | 232. 41 |
| 211. 81 | 83. 30613 | 233. 54 | 86. 437 | 232. 58 |
| 211. 98 | 83. 30443 | 233. 71 | 86. 427 | 232. 75 |
| 212. 15 | 83. 30103 | 233. 88 | 86. 42  | 232. 92 |
| 212. 32 | 83. 29763 | 234. 05 | 86. 407 | 233. 09 |
| 212. 49 | 83. 29593 | 234. 22 | 86. 397 | 233. 26 |
| 212. 66 | 83. 29423 | 234. 39 | 86. 387 | 233. 43 |
| 212. 83 | 83. 29083 | 234. 56 | 86. 377 | 233. 6  |
| 213     | 83. 28743 | 234. 73 | 86. 365 | 233. 77 |
| 213. 17 | 83. 28403 | 234. 9  | 86. 352 | 233. 94 |
| 213. 34 | 83. 27893 | 235. 07 | 86. 342 | 234. 11 |
| 213. 51 | 83. 27723 | 235. 24 | 86. 33  | 234. 28 |
| 213. 68 | 83. 27553 | 235. 41 | 86. 32  | 234. 44 |
| 213. 85 | 83. 27213 | 235. 57 | 86. 305 | 234. 61 |
| 214. 02 | 83. 26873 | 235. 74 | 86. 292 | 234. 78 |
| 214. 19 | 83. 26533 | 235. 91 | 86. 282 | 234. 95 |
| 214. 36 | 83. 26023 | 236. 08 | 86. 27  | 235. 12 |
| 214. 54 | 83. 25683 | 236. 25 | 86. 262 | 235. 29 |
| 214. 71 | 83. 25173 | 236. 42 | 86. 25  | 235. 46 |
| 214. 88 | 83. 24833 | 236. 59 | 86. 232 | 235. 63 |
| 215. 05 | 83. 24153 | 236. 76 | 86. 222 | 235. 8  |
| 215. 22 | 83. 23643 | 236. 93 | 86. 212 | 235. 97 |
| 215. 39 | 83. 23303 | 237. 1  | 86. 205 | 236. 14 |
| 215. 56 | 83. 22793 | 237. 27 | 86. 19  | 236. 31 |
| 215. 73 | 83. 22283 | 237. 44 | 86. 178 | 236. 48 |
| 215. 9  | 83. 22113 | 237. 6  | 86. 168 | 236. 64 |
| 216. 07 | 83. 21773 | 237. 77 | 86. 16  | 236. 81 |

|         |           |         |         |         |
|---------|-----------|---------|---------|---------|
| 216. 24 | 83. 21093 | 237. 94 | 86. 148 | 236. 98 |
| 216. 41 | 83. 20753 | 238. 11 | 86. 135 | 237. 15 |
| 216. 58 | 83. 20243 | 238. 28 | 86. 123 | 237. 32 |
| 216. 75 | 83. 19563 | 238. 45 | 86. 108 | 237. 49 |
| 216. 92 | 83. 19053 | 238. 62 | 86. 1   | 237. 66 |
| 217. 09 | 83. 18373 | 238. 79 | 86. 085 | 237. 83 |
| 217. 26 | 83. 17693 | 238. 96 | 86. 075 | 238     |
| 217. 43 | 83. 17183 | 239. 12 | 86. 065 | 238. 17 |
| 217. 6  | 83. 16843 | 239. 29 | 86. 06  | 238. 33 |
| 217. 77 | 83. 16163 | 239. 46 | 86. 053 | 238. 5  |
| 217. 94 | 83. 15823 | 239. 63 | 86. 048 | 238. 67 |
| 218. 11 | 83. 15313 | 239. 8  | 86. 028 | 238. 84 |
| 218. 28 | 83. 14803 | 239. 97 | 86. 013 | 239. 01 |
| 218. 46 | 83. 13953 | 240. 14 | 86. 003 | 239. 18 |
| 218. 63 | 83. 13273 | 240. 31 | 85. 99  | 239. 35 |
| 218. 8  | 83. 12593 | 240. 47 | 85. 978 | 239. 52 |
| 218. 97 | 83. 12084 | 240. 64 | 85. 965 | 239. 68 |
| 219. 14 | 83. 11574 | 240. 81 | 85. 95  | 239. 85 |
| 219. 31 | 83. 10894 | 240. 98 | 85. 938 | 240. 02 |
| 219. 48 | 83. 09874 | 241. 15 | 85. 925 | 240. 19 |
| 219. 65 | 83. 09194 | 241. 32 | 85. 915 | 240. 36 |
| 219. 82 | 83. 08514 | 241. 49 | 85. 908 | 240. 53 |
| 219. 99 | 83. 07834 | 241. 65 | 85. 895 | 240. 7  |
| 220. 16 | 83. 06474 | 241. 82 | 85. 885 | 240. 87 |
| 220. 33 | 83. 05284 | 241. 99 | 85. 873 | 241. 03 |
| 220. 5  | 83. 04774 | 242. 16 | 85. 863 | 241. 2  |
| 220. 67 | 83. 04094 | 242. 33 | 85. 851 | 241. 37 |
| 220. 84 | 83. 03074 | 242. 5  | 85. 833 | 241. 54 |
| 221. 01 | 83. 02054 | 242. 66 | 85. 823 | 241. 71 |
| 221. 18 | 83. 00864 | 242. 83 | 85. 816 | 241. 88 |
| 221. 35 | 83. 00184 | 243     | 85. 803 | 242. 05 |
| 221. 52 | 82. 99164 | 243. 17 | 85. 786 | 242. 21 |
| 221. 69 | 82. 97974 | 243. 34 | 85. 778 | 242. 38 |
| 221. 86 | 82. 96784 | 243. 51 | 85. 763 | 242. 55 |
| 222. 04 | 82. 95764 | 243. 68 | 85. 748 | 242. 72 |
| 222. 21 | 82. 94744 | 243. 84 | 85. 738 | 242. 89 |
| 222. 38 | 82. 93894 | 244. 01 | 85. 733 | 243. 06 |
| 222. 55 | 82. 92704 | 244. 18 | 85. 716 | 243. 22 |
| 222. 72 | 82. 91344 | 244. 35 | 85. 708 | 243. 39 |
| 222. 89 | 82. 89984 | 244. 52 | 85. 698 | 243. 56 |
| 223. 06 | 82. 89304 | 244. 69 | 85. 693 | 243. 73 |
| 223. 23 | 82. 87944 | 244. 85 | 85. 678 | 243. 9  |
| 223. 4  | 82. 85904 | 245. 02 | 85. 663 | 244. 07 |
| 223. 57 | 82. 84884 | 245. 19 | 85. 653 | 244. 23 |
| 223. 74 | 82. 83014 | 245. 36 | 85. 641 | 244. 4  |
| 223. 91 | 82. 81824 | 245. 53 | 85. 621 | 244. 57 |
| 224. 08 | 82. 80124 | 245. 7  | 85. 608 | 244. 74 |
| 224. 25 | 82. 78594 | 245. 86 | 85. 598 | 244. 91 |
| 224. 42 | 82. 77914 | 246. 03 | 85. 588 | 245. 08 |
| 224. 59 | 82. 76214 | 246. 2  | 85. 581 | 245. 24 |
| 224. 76 | 82. 74514 | 246. 37 | 85. 566 | 245. 41 |
| 224. 94 | 82. 72474 | 246. 54 | 85. 551 | 245. 58 |
| 225. 11 | 82. 70604 | 246. 7  | 85. 541 | 245. 75 |
| 225. 28 | 82. 69074 | 246. 87 | 85. 531 | 245. 92 |

|         |           |         |         |         |
|---------|-----------|---------|---------|---------|
| 225. 45 | 82. 67374 | 247. 04 | 85. 521 | 246. 09 |
| 225. 62 | 82. 66014 | 247. 21 | 85. 504 | 246. 26 |
| 225. 79 | 82. 64654 | 247. 38 | 85. 489 | 246. 42 |
| 225. 96 | 82. 62444 | 247. 55 | 85. 476 | 246. 59 |
| 226. 13 | 82. 60234 | 247. 71 | 85. 469 | 246. 76 |
| 226. 3  | 82. 58194 | 247. 88 | 85. 456 | 246. 93 |
| 226. 47 | 82. 55814 | 248. 05 | 85. 441 | 247. 1  |
| 226. 64 | 82. 52754 | 248. 22 | 85. 429 | 247. 26 |
| 226. 81 | 82. 50714 | 248. 39 | 85. 414 | 247. 43 |
| 226. 98 | 82. 48504 | 248. 56 | 85. 399 | 247. 6  |
| 227. 15 | 82. 46294 | 248. 72 | 85. 384 | 247. 77 |
| 227. 32 | 82. 44254 | 248. 89 | 85. 369 | 247. 94 |
| 227. 49 | 82. 41364 | 249. 06 | 85. 354 | 248. 11 |
| 227. 67 | 82. 38984 | 249. 23 | 85. 341 | 248. 27 |
| 227. 84 | 82. 35754 | 249. 4  | 85. 326 | 248. 44 |
| 228. 01 | 82. 33034 | 249. 56 | 85. 316 | 248. 61 |
| 228. 18 | 82. 30654 | 249. 73 | 85. 304 | 248. 78 |
| 228. 35 | 82. 26914 | 249. 9  | 85. 291 | 248. 95 |
| 228. 52 | 82. 23854 | 250. 07 | 85. 279 | 249. 12 |
| 228. 69 | 82. 20284 | 250. 24 | 85. 271 | 249. 28 |
| 228. 86 | 82. 17054 | 250. 41 | 85. 264 | 249. 45 |
| 229. 03 | 82. 13824 | 250. 57 | 85. 246 | 249. 62 |
| 229. 2  | 82. 10084 | 250. 74 | 85. 226 | 249. 79 |
| 229. 37 | 82. 07024 | 250. 91 | 85. 211 | 249. 96 |
| 229. 54 | 82. 03624 | 251. 08 | 85. 199 | 250. 12 |
| 229. 71 | 81. 99544 | 251. 25 | 85. 186 | 250. 29 |
| 229. 88 | 81. 95124 | 251. 41 | 85. 169 | 250. 46 |
| 230. 05 | 81. 91044 | 251. 58 | 85. 157 | 250. 63 |
| 230. 22 | 81. 88154 | 251. 75 | 85. 142 | 250. 8  |
| 230. 39 | 81. 83395 | 251. 92 | 85. 122 | 250. 96 |
| 230. 56 | 81. 79995 | 252. 09 | 85. 114 | 251. 13 |
| 230. 73 | 81. 75065 | 252. 26 | 85. 097 | 251. 3  |
| 230. 9  | 81. 69625 | 252. 42 | 85. 079 | 251. 47 |
| 231. 07 | 81. 65885 | 252. 59 | 85. 067 | 251. 64 |
| 231. 24 | 81. 60955 | 252. 76 | 85. 052 | 251. 81 |
| 231. 41 | 81. 56025 | 252. 93 | 85. 039 | 251. 97 |
| 231. 58 | 81. 49905 | 253. 1  | 85. 022 | 252. 14 |
| 231. 75 | 81. 45825 | 253. 26 | 85. 012 | 252. 31 |
| 231. 92 | 81. 39705 | 253. 43 | 84. 994 | 252. 48 |
| 232. 09 | 81. 34605 | 253. 6  | 84. 982 | 252. 65 |
| 232. 26 | 81. 29165 | 253. 77 | 84. 969 | 252. 81 |
| 232. 43 | 81. 23385 | 253. 94 | 84. 954 | 252. 98 |
| 232. 6  | 81. 17095 | 254. 11 | 84. 939 | 253. 15 |
| 232. 77 | 81. 11485 | 254. 27 | 84. 922 | 253. 32 |
| 232. 94 | 81. 04175 | 254. 44 | 84. 904 | 253. 49 |
| 233. 11 | 80. 98565 | 254. 61 | 84. 889 | 253. 66 |
| 233. 28 | 80. 91425 | 254. 78 | 84. 882 | 253. 82 |
| 233. 45 | 80. 84965 | 254. 95 | 84. 864 | 253. 99 |
| 233. 62 | 80. 78505 | 255. 11 | 84. 852 | 254. 16 |
| 233. 78 | 80. 71875 | 255. 28 | 84. 837 | 254. 33 |
| 233. 95 | 80. 63545 | 255. 45 | 84. 817 | 254. 5  |
| 234. 12 | 80. 56746 | 255. 62 | 84. 802 | 254. 66 |
| 234. 29 | 80. 49946 | 255. 79 | 84. 785 | 254. 83 |
| 234. 46 | 80. 41956 | 255. 95 | 84. 765 | 255     |



|         |           |         |         |         |
|---------|-----------|---------|---------|---------|
| 234. 63 | 80. 33626 | 256. 12 | 84. 75  | 255. 17 |
| 234. 8  | 80. 26146 | 256. 29 | 84. 735 | 255. 34 |
| 234. 97 | 80. 17306 | 256. 46 | 84. 725 | 255. 51 |
| 235. 14 | 80. 08806 | 256. 63 | 84. 7   | 255. 67 |
| 235. 31 | 79. 99796 | 256. 8  | 84. 682 | 255. 84 |
| 235. 48 | 79. 92996 | 256. 96 | 84. 662 | 256. 01 |
| 235. 65 | 79. 82796 | 257. 13 | 84. 647 | 256. 18 |
| 235. 82 | 79. 73276 | 257. 3  | 84. 637 | 256. 35 |
| 235. 98 | 79. 64606 | 257. 47 | 84. 62  | 256. 51 |
| 236. 15 | 79. 54406 | 257. 64 | 84. 597 | 256. 68 |
| 236. 32 | 79. 44036 | 257. 8  | 84. 58  | 256. 85 |
| 236. 49 | 79. 34857 | 257. 97 | 84. 565 | 257. 02 |
| 236. 66 | 79. 25337 | 258. 14 | 84. 55  | 257. 19 |
| 236. 83 | 79. 14967 | 258. 31 | 84. 53  | 257. 35 |
| 237     | 79. 03407 | 258. 48 | 84. 517 | 257. 52 |
| 237. 17 | 78. 93377 | 258. 65 | 84. 495 | 257. 69 |
| 237. 34 | 78. 82327 | 258. 81 | 84. 48  | 257. 86 |
| 237. 5  | 78. 72637 | 258. 98 | 84. 463 | 258. 03 |
| 237. 67 | 78. 60057 | 259. 15 | 84. 448 | 258. 19 |
| 237. 84 | 78. 49517 | 259. 32 | 84. 43  | 258. 36 |
| 238. 01 | 78. 37277 | 259. 49 | 84. 405 | 258. 53 |
| 238. 18 | 78. 25887 | 259. 65 | 84. 398 | 258. 7  |
| 238. 35 | 78. 13817 | 259. 82 | 84. 375 | 258. 87 |
| 238. 52 | 78. 01748 | 259. 99 | 84. 363 | 259. 04 |
| 238. 69 | 77. 88828 | 260. 16 | 84. 34  | 259. 2  |
| 238. 86 | 77. 76928 | 260. 33 | 84. 32  | 259. 37 |
| 239. 03 | 77. 63668 | 260. 5  | 84. 295 | 259. 54 |
| 239. 19 | 77. 50238 | 260. 66 | 84. 285 | 259. 71 |
| 239. 36 | 77. 36978 | 260. 83 | 84. 265 | 259. 88 |
| 239. 53 | 77. 23038 | 261     | 84. 245 | 260. 04 |
| 239. 7  | 77. 09778 | 261. 17 | 84. 233 | 260. 21 |
| 239. 87 | 76. 96178 | 261. 34 | 84. 208 | 260. 38 |
| 240. 04 | 76. 81219 | 261. 5  | 84. 18  | 260. 55 |
| 240. 21 | 76. 66769 | 261. 67 | 84. 155 | 260. 72 |
| 240. 38 | 76. 52319 | 261. 84 | 84. 143 | 260. 89 |
| 240. 54 | 76. 38209 | 262. 01 | 84. 126 | 261. 05 |
| 240. 71 | 76. 23249 | 262. 18 | 84. 108 | 261. 22 |
| 240. 88 | 76. 06759 | 262. 35 | 84. 086 | 261. 39 |
| 241. 05 | 75. 90269 | 262. 51 | 84. 056 | 261. 56 |
| 241. 22 | 75. 74969 | 262. 68 | 84. 043 | 261. 73 |
| 241. 39 | 75. 5933  | 262. 85 | 84. 021 | 261. 9  |
| 241. 56 | 75. 4284  | 263. 02 | 83. 998 | 262. 06 |
| 241. 73 | 75. 2703  | 263. 19 | 83. 981 | 262. 23 |
| 241. 9  | 75. 0884  | 263. 35 | 83. 966 | 262. 4  |
| 242. 06 | 74. 9218  | 263. 52 | 83. 943 | 262. 57 |
| 242. 23 | 74. 7314  | 263. 69 | 83. 926 | 262. 74 |
| 242. 4  | 74. 5478  | 263. 86 | 83. 906 | 262. 91 |
| 242. 57 | 74. 36251 | 264. 03 | 83. 883 | 263. 07 |
| 242. 74 | 74. 18571 | 264. 19 | 83. 856 | 263. 24 |
| 242. 91 | 74. 00041 | 264. 36 | 83. 838 | 263. 41 |
| 243. 08 | 73. 78791 | 264. 53 | 83. 818 | 263. 58 |
| 243. 25 | 73. 58051 | 264. 7  | 83. 803 | 263. 75 |
| 243. 42 | 73. 35781 | 264. 87 | 83. 776 | 263. 92 |
| 243. 59 | 73. 17931 | 265. 04 | 83. 741 | 264. 08 |

|        |          |        |        |        |
|--------|----------|--------|--------|--------|
| 243.76 | 72.97872 | 265.2  | 83.734 | 264.25 |
| 243.92 | 72.77812 | 265.37 | 83.709 | 264.42 |
| 244.09 | 72.57412 | 265.54 | 83.689 | 264.59 |
| 244.26 | 72.36502 | 265.71 | 83.656 | 264.76 |
| 244.43 | 72.15422 | 265.88 | 83.631 | 264.92 |
| 244.6  | 71.93832 | 266.05 | 83.609 | 265.09 |
| 244.77 | 71.72073 | 266.21 | 83.601 | 265.26 |
| 244.94 | 71.50483 | 266.38 | 83.579 | 265.43 |
| 245.11 | 71.26853 | 266.55 | 83.549 | 265.6  |
| 245.28 | 71.04243 | 266.72 | 83.524 | 265.77 |
| 245.45 | 70.81633 | 266.89 | 83.509 | 265.93 |
| 245.62 | 70.60724 | 267.06 | 83.486 | 266.1  |
| 245.79 | 70.36584 | 267.22 | 83.459 | 266.27 |
| 245.96 | 70.15674 | 267.39 | 83.427 | 266.44 |
| 246.13 | 69.93064 | 267.56 | 83.407 | 266.61 |
| 246.3  | 69.69774 | 267.73 | 83.377 | 266.78 |
| 246.47 | 69.46144 | 267.9  | 83.367 | 266.94 |
| 246.63 | 69.24725 | 268.07 | 83.334 | 267.11 |
| 246.8  | 69.01605 | 268.23 | 83.309 | 267.28 |
| 246.97 | 68.79165 | 268.4  | 83.277 | 267.45 |
| 247.14 | 68.56725 | 268.57 | 83.272 | 267.62 |
| 247.31 | 68.33095 | 268.74 | 83.247 | 267.79 |
| 247.48 | 68.10486 | 268.91 | 83.212 | 267.96 |
| 247.65 | 67.86856 | 269.07 | 83.179 | 268.12 |
| 247.82 | 67.63906 | 269.24 | 83.152 | 268.29 |
| 247.99 | 67.41466 | 269.41 | 83.132 | 268.46 |
| 248.16 | 67.16816 | 269.58 | 83.112 | 268.63 |
| 248.33 | 66.92336 | 269.75 | 83.085 | 268.8  |
| 248.5  | 66.69557 | 269.92 | 83.052 | 268.97 |
| 248.67 | 66.45077 | 270.08 | 83.032 | 269.13 |
| 248.84 | 66.21787 | 270.25 | 83.015 | 269.3  |
| 249    | 65.99177 | 270.42 | 82.987 | 269.47 |
| 249.17 | 65.74867 | 270.59 | 82.95  | 269.64 |
| 249.34 | 65.51918 | 270.76 | 82.922 | 269.81 |
| 249.51 | 65.28798 | 270.93 | 82.887 | 269.98 |
| 249.68 | 65.04828 | 271.09 | 82.865 | 270.14 |
| 249.85 | 64.81028 | 271.26 | 82.837 | 270.31 |
| 250.02 | 64.57058 | 271.43 | 82.805 | 270.48 |
| 250.19 | 64.34449 | 271.6  | 82.777 | 270.65 |
| 250.36 | 64.09799 | 271.77 | 82.75  | 270.82 |
| 250.53 | 63.85999 | 271.94 | 82.72  | 270.99 |
| 250.7  | 63.62029 | 272.11 | 82.705 | 271.15 |
| 250.87 | 63.37719 | 272.27 | 82.675 | 271.32 |
| 251.03 | 63.14599 | 272.44 | 82.638 | 271.49 |
| 251.2  | 62.9097  | 272.61 | 82.613 | 271.66 |
| 251.37 | 62.6836  | 272.78 | 82.588 | 271.83 |
| 251.54 | 62.4456  | 272.95 | 82.555 | 272    |
| 251.71 | 62.2161  | 273.12 | 82.528 | 272.17 |
| 251.88 | 61.9866  | 273.29 | 82.498 | 272.33 |
| 252.05 | 61.74861 | 273.45 | 82.473 | 272.5  |
| 252.22 | 61.51401 | 273.62 | 82.425 | 272.67 |
| 252.39 | 61.28961 | 273.79 | 82.406 | 272.84 |
| 252.56 | 61.06011 | 273.96 | 82.361 | 273.01 |
| 252.73 | 60.82891 | 274.13 | 82.343 | 273.18 |

|         |           |         |         |         |
|---------|-----------|---------|---------|---------|
| 252. 89 | 60. 59432 | 274. 3  | 82. 301 | 273. 35 |
| 253. 06 | 60. 36142 | 274. 46 | 82. 278 | 273. 51 |
| 253. 23 | 60. 13872 | 274. 63 | 82. 236 | 273. 68 |
| 253. 4  | 59. 90752 | 274. 8  | 82. 213 | 273. 85 |
| 253. 57 | 59. 68312 | 274. 97 | 82. 178 | 274. 02 |
| 253. 74 | 59. 45022 | 275. 14 | 82. 148 | 274. 19 |
| 253. 91 | 59. 22583 | 275. 31 | 82. 101 | 274. 36 |
| 254. 08 | 58. 98613 | 275. 48 | 82. 088 | 274. 53 |
| 254. 25 | 58. 77703 | 275. 64 | 82. 049 | 274. 69 |
| 254. 41 | 58. 54923 | 275. 81 | 82. 024 | 274. 86 |
| 254. 58 | 58. 32653 | 275. 98 | 81. 986 | 275. 03 |
| 254. 75 | 58. 09534 | 276. 15 | 81. 951 | 275. 2  |
| 254. 92 | 57. 87094 | 276. 32 | 81. 921 | 275. 37 |
| 255. 09 | 57. 65164 | 276. 49 | 81. 881 | 275. 54 |
| 255. 26 | 57. 42894 | 276. 66 | 81. 849 | 275. 71 |
| 255. 43 | 57. 20624 | 276. 82 | 81. 821 | 275. 88 |
| 255. 6  | 56. 99714 | 276. 99 | 81. 781 | 276. 04 |
| 255. 76 | 56. 76765 | 277. 16 | 81. 744 | 276. 21 |
| 255. 93 | 56. 54835 | 277. 33 | 81. 712 | 276. 38 |
| 256. 1  | 56. 32905 | 277. 5  | 81. 677 | 276. 55 |
| 256. 27 | 56. 11655 | 277. 67 | 81. 642 | 276. 72 |
| 256. 44 | 55. 89555 | 277. 83 | 81. 614 | 276. 89 |
| 256. 61 | 55. 68135 | 278     | 81. 562 | 277. 06 |
| 256. 78 | 55. 47566 | 278. 17 | 81. 527 | 277. 22 |
| 256. 94 | 55. 26146 | 278. 34 | 81. 512 | 277. 39 |
| 257. 11 | 55. 04216 | 278. 51 | 81. 472 | 277. 56 |
| 257. 28 | 54. 82966 | 278. 68 | 81. 417 | 277. 73 |
| 257. 45 | 54. 61886 | 278. 85 | 81. 389 | 277. 9  |
| 257. 62 | 54. 41656 | 279. 02 | 81. 342 | 278. 07 |
| 257. 79 | 54. 20577 | 279. 18 | 81. 317 | 278. 24 |
| 257. 96 | 53. 98987 | 279. 35 | 81. 262 | 278. 41 |
| 258. 13 | 53. 78417 | 279. 52 | 81. 247 | 278. 58 |
| 258. 29 | 53. 58187 | 279. 69 | 81. 207 | 278. 74 |
| 258. 46 | 53. 36767 | 279. 86 | 81. 16  | 278. 91 |
| 258. 63 | 53. 17557 | 280. 03 | 81. 117 | 279. 08 |
| 258. 8  | 52. 96648 | 280. 2  | 81. 06  | 279. 25 |
| 258. 97 | 52. 76928 | 280. 36 | 81. 047 | 279. 42 |
| 259. 14 | 52. 56868 | 280. 53 | 80. 998 | 279. 59 |
| 259. 31 | 52. 35788 | 280. 7  | 80. 96  | 279. 76 |
| 259. 48 | 52. 16068 | 280. 87 | 80. 913 | 279. 93 |
| 259. 64 | 51. 96518 | 281. 04 | 80. 873 | 280. 1  |
| 259. 81 | 51. 77139 | 281. 21 | 80. 833 | 280. 26 |
| 259. 98 | 51. 57759 | 281. 38 | 80. 793 | 280. 43 |
| 260. 15 | 51. 38379 | 281. 54 | 80. 77  | 280. 6  |
| 260. 32 | 51. 18829 | 281. 71 | 80. 705 | 280. 77 |
| 260. 49 | 50. 98599 | 281. 88 | 80. 663 | 280. 94 |
| 260. 66 | 50. 79729 | 282. 05 | 80. 628 | 281. 11 |
| 260. 83 | 50. 6052  | 282. 22 | 80. 593 | 281. 28 |
| 260. 99 | 50. 4165  | 282. 39 | 80. 553 | 281. 45 |
| 261. 16 | 50. 2244  | 282. 56 | 80. 498 | 281. 62 |
| 261. 33 | 50. 0391  | 282. 72 | 80. 451 | 281. 78 |
| 261. 5  | 49. 8538  | 282. 89 | 80. 408 | 281. 95 |
| 261. 67 | 49. 6736  | 283. 06 | 80. 368 | 282. 12 |
| 261. 84 | 49. 4866  | 283. 23 | 80. 326 | 282. 29 |

|         |           |         |         |         |
|---------|-----------|---------|---------|---------|
| 262. 01 | 49. 30811 | 283. 4  | 80. 294 | 282. 46 |
| 262. 17 | 49. 12111 | 283. 57 | 80. 236 | 282. 63 |
| 262. 34 | 48. 94261 | 283. 74 | 80. 194 | 282. 8  |
| 262. 51 | 48. 77091 | 283. 91 | 80. 156 | 282. 97 |
| 262. 68 | 48. 59581 | 284. 08 | 80. 119 | 283. 14 |
| 262. 85 | 48. 41731 | 284. 24 | 80. 059 | 283. 3  |
| 263. 02 | 48. 24901 | 284. 41 | 80. 016 | 283. 47 |
| 263. 19 | 48. 06712 | 284. 58 | 79. 964 | 283. 64 |
| 263. 35 | 47. 89372 | 284. 75 | 79. 929 | 283. 81 |
| 263. 52 | 47. 72712 | 284. 92 | 79. 892 | 283. 98 |
| 263. 69 | 47. 55882 | 285. 09 | 79. 852 | 284. 15 |
| 263. 86 | 47. 39732 | 285. 26 | 79. 784 | 284. 32 |
| 264. 03 | 47. 23242 | 285. 43 | 79. 749 | 284. 49 |
| 264. 2  | 47. 07262 | 285. 59 | 79. 702 | 284. 66 |
| 264. 37 | 46. 90092 | 285. 76 | 79. 667 | 284. 83 |
| 264. 53 | 46. 73943 | 285. 93 | 79. 617 | 285     |
| 264. 7  | 46. 58133 | 286. 1  | 79. 547 | 285. 17 |
| 264. 87 | 46. 41813 | 286. 27 | 79. 525 | 285. 33 |
| 265. 04 | 46. 26513 | 286. 44 | 79. 467 | 285. 5  |
| 265. 21 | 46. 10023 | 286. 61 | 79. 435 | 285. 67 |
| 265. 38 | 45. 93023 | 286. 78 | 79. 377 | 285. 84 |
| 265. 55 | 45. 78403 | 286. 94 | 79. 325 | 286. 01 |
| 265. 72 | 45. 63103 | 287. 11 | 79. 278 | 286. 18 |
| 265. 88 | 45. 47804 | 287. 28 | 79. 243 | 286. 35 |
| 266. 05 | 45. 32164 | 287. 45 | 79. 195 | 286. 52 |
| 266. 22 | 45. 16694 | 287. 62 | 79. 133 | 286. 69 |
| 266. 39 | 45. 02414 | 287. 79 | 79. 098 | 286. 86 |
| 266. 56 | 44. 86944 | 287. 96 | 79. 04  | 287. 03 |
| 266. 73 | 44. 72494 | 288. 13 | 79. 008 | 287. 19 |
| 266. 9  | 44. 58554 | 288. 3  | 78. 958 | 287. 36 |
| 267. 07 | 44. 44954 | 288. 46 | 78. 903 | 287. 53 |
| 267. 24 | 44. 29655 | 288. 63 | 78. 848 | 287. 7  |
| 267. 41 | 44. 15715 | 288. 8  | 78. 806 | 287. 87 |
| 267. 57 | 44. 01945 | 288. 97 | 78. 758 | 288. 04 |
| 267. 74 | 43. 87495 | 289. 14 | 78. 711 | 288. 21 |
| 267. 91 | 43. 74065 | 289. 31 | 78. 663 | 288. 38 |
| 268. 08 | 43. 60125 | 289. 48 | 78. 621 | 288. 55 |
| 268. 25 | 43. 47035 | 289. 65 | 78. 561 | 288. 72 |
| 268. 42 | 43. 33605 | 289. 82 | 78. 519 | 288. 89 |
| 268. 59 | 43. 19665 | 289. 99 | 78. 474 | 289. 06 |
| 268. 76 | 43. 07426 | 290. 15 | 78. 426 | 289. 23 |
| 268. 93 | 42. 93996 | 290. 32 | 78. 364 | 289. 4  |
| 269. 09 | 42. 82096 | 290. 49 | 78. 314 | 289. 56 |
| 269. 26 | 42. 69346 | 290. 66 | 78. 279 | 289. 73 |
| 269. 43 | 42. 56936 | 290. 83 | 78. 232 | 289. 9  |
| 269. 6  | 42. 44356 | 291     | 78. 184 | 290. 07 |
| 269. 77 | 42. 32456 | 291. 17 | 78. 132 | 290. 24 |
| 269. 94 | 42. 20726 | 291. 34 | 78. 059 | 290. 41 |
| 270. 11 | 42. 09506 | 291. 51 | 78. 037 | 290. 58 |
| 270. 28 | 41. 97776 | 291. 68 | 77. 994 | 290. 75 |
| 270. 45 | 41. 85537 | 291. 84 | 77. 944 | 290. 92 |
| 270. 61 | 41. 73637 | 292. 01 | 77. 895 | 291. 09 |
| 270. 78 | 41. 63097 | 292. 18 | 77. 835 | 291. 26 |
| 270. 95 | 41. 51537 | 292. 35 | 77. 787 | 291. 43 |

|         |           |         |         |         |
|---------|-----------|---------|---------|---------|
| 271. 12 | 41. 41167 | 292. 52 | 77. 76  | 291. 6  |
| 271. 29 | 41. 30287 | 292. 69 | 77. 705 | 291. 77 |
| 271. 46 | 41. 19747 | 292. 86 | 77. 655 | 291. 93 |
| 271. 63 | 41. 09207 | 293. 03 | 77. 605 | 292. 1  |
| 271. 8  | 40. 98497 | 293. 2  | 77. 56  | 292. 27 |
| 271. 97 | 40. 89147 | 293. 37 | 77. 53  | 292. 44 |
| 272. 14 | 40. 79287 | 293. 54 | 77. 478 | 292. 61 |
| 272. 3  | 40. 69597 | 293. 71 | 77. 428 | 292. 78 |
| 272. 47 | 40. 59398 | 293. 87 | 77. 368 | 292. 95 |
| 272. 64 | 40. 49708 | 294. 04 | 77. 328 | 293. 12 |
| 272. 81 | 40. 40528 | 294. 21 | 77. 278 | 293. 29 |
| 272. 98 | 40. 31178 | 294. 38 | 77. 243 | 293. 46 |
| 273. 15 | 40. 22338 | 294. 55 | 77. 176 | 293. 63 |
| 273. 32 | 40. 12988 | 294. 72 | 77. 138 | 293. 8  |
| 273. 49 | 40. 05508 | 294. 89 | 77. 091 | 293. 97 |
| 273. 66 | 39. 95988 | 295. 06 | 77. 058 | 294. 14 |
| 273. 83 | 39. 86978 | 295. 23 | 77. 003 | 294. 31 |
| 274     | 39. 80008 | 295. 4  | 76. 968 | 294. 48 |
| 274. 17 | 39. 72358 | 295. 57 | 76. 903 | 294. 65 |
| 274. 33 | 39. 63858 | 295. 74 | 76. 861 | 294. 81 |
| 274. 5  | 39. 56378 | 295. 9  | 76. 834 | 294. 98 |
| 274. 67 | 39. 48048 | 296. 07 | 76. 791 | 295. 15 |
| 274. 84 | 39. 40228 | 296. 24 | 76. 744 | 295. 32 |
| 275. 01 | 39. 32749 | 296. 41 | 76. 684 | 295. 49 |
| 275. 18 | 39. 26289 | 296. 58 | 76. 639 | 295. 66 |
| 275. 35 | 39. 19319 | 296. 75 | 76. 601 | 295. 83 |
| 275. 52 | 39. 12519 | 296. 92 | 76. 571 | 296     |
| 275. 69 | 39. 05719 | 297. 09 | 76. 514 | 296. 17 |
| 275. 86 | 38. 98409 | 297. 26 | 76. 479 | 296. 34 |
| 276. 03 | 38. 91949 | 297. 43 | 76. 427 | 296. 51 |
| 276. 2  | 38. 85829 | 297. 6  | 76. 397 | 296. 68 |
| 276. 37 | 38. 80389 | 297. 77 | 76. 354 | 296. 85 |
| 276. 54 | 38. 73079 | 297. 94 | 76. 327 | 297. 02 |
| 276. 71 | 38. 67809 | 298. 1  | 76. 262 | 297. 19 |
| 276. 87 | 38. 60839 | 298. 27 | 76. 217 | 297. 36 |
| 277. 04 | 38. 55569 | 298. 44 | 76. 177 | 297. 53 |
| 277. 21 | 38. 49789 | 298. 61 | 76. 14  | 297. 7  |
| 277. 38 | 38. 45539 | 298. 78 | 76. 097 | 297. 87 |
| 277. 55 | 38. 39929 | 298. 95 | 76. 045 | 298. 04 |
| 277. 72 | 38. 35169 | 299. 12 | 76. 002 | 298. 21 |
| 277. 89 | 38. 29899 | 299. 29 | 75. 97  | 298. 38 |
| 278. 06 | 38. 24629 | 299. 46 | 75. 945 | 298. 55 |
| 278. 23 | 38. 19529 | 299. 63 | 75. 897 | 298. 72 |
| 278. 4  | 38. 14769 | 299. 8  | 75. 865 | 298. 88 |
| 278. 57 | 38. 1018  | 299. 97 | 75. 798 | 299. 05 |
| 278. 74 | 38. 0576  | 300. 14 | 75. 768 | 299. 22 |
| 278. 91 | 38. 0083  | 300. 31 | 75. 738 | 299. 39 |
| 279. 08 | 37. 9675  | 300. 48 | 75. 693 | 299. 56 |
| 279. 25 | 37. 9216  | 300. 65 | 75. 638 | 299. 73 |
| 279. 42 | 37. 891   | 300. 81 | 75. 595 | 299. 9  |
| 279. 59 | 37. 84    | 300. 98 | 75. 57  | 300. 07 |
| 279. 76 | 37. 8145  | 301. 15 | 75. 54  | 300. 24 |
| 279. 92 | 37. 7635  | 301. 32 | 75. 491 | 300. 41 |
| 280. 09 | 37. 7346  | 301. 49 | 75. 443 | 300. 58 |

|         |           |         |         |         |
|---------|-----------|---------|---------|---------|
| 280. 26 | 37. 6904  | 301. 66 | 75. 413 | 300. 75 |
| 280. 43 | 37. 6547  | 301. 83 | 75. 376 | 300. 92 |
| 280. 6  | 37. 6207  | 302     | 75. 328 | 301. 09 |
| 280. 77 | 37. 5918  | 302. 17 | 75. 291 | 301. 26 |
| 280. 94 | 37. 5578  | 302. 34 | 75. 256 | 301. 43 |
| 281. 11 | 37. 5136  | 302. 51 | 75. 231 | 301. 6  |
| 281. 28 | 37. 4864  | 302. 68 | 75. 176 | 301. 77 |
| 281. 45 | 37. 4473  | 302. 85 | 75. 136 | 301. 94 |
| 281. 62 | 37. 4235  | 303. 02 | 75. 096 | 302. 11 |
| 281. 79 | 37. 3929  | 303. 19 | 75. 064 | 302. 28 |
| 281. 96 | 37. 3674  | 303. 36 | 75. 041 | 302. 45 |
| 282. 13 | 37. 3317  | 303. 53 | 75. 004 | 302. 62 |
| 282. 3  | 37. 313   | 303. 7  | 74. 956 | 302. 79 |
| 282. 47 | 37. 2892  | 303. 87 | 74. 929 | 302. 96 |
| 282. 64 | 37. 2518  | 304. 04 | 74. 886 | 303. 13 |
| 282. 81 | 37. 2297  | 304. 21 | 74. 841 | 303. 3  |
| 282. 98 | 37. 1991  | 304. 38 | 74. 819 | 303. 47 |
| 283. 15 | 37. 177   | 304. 55 | 74. 779 | 303. 64 |
| 283. 32 | 37. 1498  | 304. 72 | 74. 744 | 303. 81 |
| 283. 49 | 37. 126   | 304. 89 | 74. 694 | 303. 98 |
| 283. 66 | 37. 1056  | 305. 06 | 74. 669 | 304. 15 |
| 283. 83 | 37. 0869  | 305. 22 | 74. 637 | 304. 32 |
| 284     | 37. 0648  | 305. 39 | 74. 609 | 304. 49 |
| 284. 17 | 37. 0427  | 305. 56 | 74. 567 | 304. 66 |
| 284. 34 | 37. 0206  | 305. 73 | 74. 527 | 304. 83 |
| 284. 51 | 36. 9934  | 305. 9  | 74. 497 | 305     |
| 284. 68 | 36. 9696  | 306. 07 | 74. 477 | 305. 17 |
| 284. 85 | 36. 9543  | 306. 24 | 74. 427 | 305. 34 |
| 285. 02 | 36. 9322  | 306. 41 | 74. 405 | 305. 51 |
| 285. 19 | 36. 9186  | 306. 58 | 74. 352 | 305. 68 |
| 285. 36 | 36. 9033  | 306. 75 | 74. 34  | 305. 85 |
| 285. 53 | 36. 8863  | 306. 92 | 74. 302 | 306. 02 |
| 285. 7  | 36. 86251 | 307. 09 | 74. 27  | 306. 19 |
| 285. 87 | 36. 83021 | 307. 26 | 74. 235 | 306. 36 |
| 286. 04 | 36. 81491 | 307. 43 | 74. 197 | 306. 53 |
| 286. 21 | 36. 80131 | 307. 6  | 74. 17  | 306. 7  |
| 286. 37 | 36. 79111 | 307. 77 | 74. 142 | 306. 87 |
| 286. 54 | 36. 77071 | 307. 94 | 74. 118 | 307. 04 |
| 286. 71 | 36. 75541 | 308. 11 | 74. 058 | 307. 21 |
| 286. 88 | 36. 73501 | 308. 28 | 74. 033 | 307. 38 |
| 287. 05 | 36. 71801 | 308. 45 | 74. 003 | 307. 55 |
| 287. 22 | 36. 70441 | 308. 62 | 73. 98  | 307. 72 |
| 287. 39 | 36. 68231 | 308. 79 | 73. 945 | 307. 89 |
| 287. 56 | 36. 66871 | 308. 96 | 73. 915 | 308. 06 |
| 287. 73 | 36. 66021 | 309. 13 | 73. 873 | 308. 23 |
| 287. 9  | 36. 64831 | 309. 3  | 73. 848 | 308. 4  |
| 288. 07 | 36. 62621 | 309. 47 | 73. 825 | 308. 57 |
| 288. 24 | 36. 61771 | 309. 64 | 73. 781 | 308. 74 |
| 288. 41 | 36. 60071 | 309. 81 | 73. 758 | 308. 91 |
| 288. 58 | 36. 58371 | 309. 98 | 73. 721 | 309. 08 |
| 288. 75 | 36. 57351 | 310. 15 | 73. 703 | 309. 25 |
| 288. 92 | 36. 56331 | 310. 32 | 73. 663 | 309. 42 |
| 289. 09 | 36. 54461 | 310. 49 | 73. 633 | 309. 59 |
| 289. 26 | 36. 53101 | 310. 66 | 73. 596 | 309. 76 |

|         |           |         |         |         |
|---------|-----------|---------|---------|---------|
| 289. 43 | 36. 51741 | 310. 83 | 73. 576 | 309. 93 |
| 289. 6  | 36. 51061 | 311     | 73. 543 | 310. 1  |
| 289. 77 | 36. 49701 | 311. 17 | 73. 523 | 310. 27 |
| 289. 94 | 36. 48681 | 311. 34 | 73. 481 | 310. 44 |
| 290. 11 | 36. 47151 | 311. 51 | 73. 453 | 310. 61 |
| 290. 28 | 36. 46131 | 311. 68 | 73. 434 | 310. 78 |
| 290. 45 | 36. 44431 | 311. 85 | 73. 394 | 310. 95 |
| 290. 62 | 36. 43411 | 312. 02 | 73. 374 | 311. 12 |
| 290. 79 | 36. 42051 | 312. 19 | 73. 334 | 311. 29 |
| 290. 96 | 36. 40351 | 312. 36 | 73. 306 | 311. 46 |
| 291. 13 | 36. 39331 | 312. 53 | 73. 279 | 311. 63 |
| 291. 3  | 36. 38821 | 312. 7  | 73. 251 | 311. 8  |
| 291. 47 | 36. 37631 | 312. 87 | 73. 214 | 311. 97 |
| 291. 64 | 36. 36441 | 313. 04 | 73. 199 | 312. 14 |
| 291. 81 | 36. 35591 | 313. 21 | 73. 171 | 312. 31 |
| 291. 98 | 36. 34231 | 313. 38 | 73. 131 | 312. 48 |
| 292. 15 | 36. 33381 | 313. 55 | 73. 109 | 312. 65 |
| 292. 32 | 36. 32531 | 313. 72 | 73. 074 | 312. 82 |
| 292. 49 | 36. 31171 | 313. 89 | 73. 054 | 312. 99 |
| 292. 66 | 36. 29811 | 314. 06 | 73. 024 | 313. 16 |
| 292. 83 | 36. 28961 | 314. 23 | 72. 994 | 313. 33 |
| 293     | 36. 28451 | 314. 4  | 72. 969 | 313. 5  |
| 293. 17 | 36. 27261 | 314. 57 | 72. 949 | 313. 67 |
| 293. 34 | 36. 26411 | 314. 74 | 72. 909 | 313. 84 |
| 293. 51 | 36. 25221 | 314. 91 | 72. 884 | 314. 01 |
| 293. 68 | 36. 24541 | 315. 08 | 72. 864 | 314. 18 |
| 293. 85 | 36. 23521 | 315. 25 | 72. 847 | 314. 35 |
| 294. 02 | 36. 22671 | 315. 42 | 72. 804 | 314. 52 |
| 294. 19 | 36. 21821 | 315. 6  | 72. 789 | 314. 69 |
| 294. 36 | 36. 20971 | 315. 77 | 72. 755 | 314. 86 |
| 294. 53 | 36. 19781 | 315. 94 | 72. 735 | 315. 03 |
| 294. 7  | 36. 18421 | 316. 11 | 72. 71  | 315. 2  |
| 294. 87 | 36. 17401 | 316. 28 | 72. 675 | 315. 38 |
| 295. 04 | 36. 17061 | 316. 45 | 72. 647 | 315. 55 |
| 295. 21 | 36. 16381 | 316. 62 | 72. 635 | 315. 72 |
| 295. 38 | 36. 15191 | 316. 79 | 72. 605 | 315. 89 |
| 295. 55 | 36. 14511 | 316. 96 | 72. 582 | 316. 06 |
| 295. 72 | 36. 13491 | 317. 13 | 72. 557 | 316. 23 |
| 295. 89 | 36. 12641 | 317. 3  | 72. 527 | 316. 4  |
| 296. 06 | 36. 11621 | 317. 47 | 72. 5   | 316. 57 |
| 296. 23 | 36. 10941 | 317. 64 | 72. 475 | 316. 74 |
| 296. 4  | 36. 09921 | 317. 81 | 72. 447 | 316. 91 |
| 296. 57 | 36. 09071 | 317. 98 | 72. 42  | 317. 08 |
| 296. 74 | 36. 08221 | 318. 15 | 72. 39  | 317. 25 |
| 296. 91 | 36. 07711 | 318. 32 | 72. 373 | 317. 42 |
| 297. 08 | 36. 07201 | 318. 49 | 72. 345 | 317. 59 |
| 297. 25 | 36. 06351 | 318. 66 | 72. 318 | 317. 76 |
| 297. 42 | 36. 05841 | 318. 83 | 72. 288 | 317. 93 |
| 297. 59 | 36. 04651 | 319     | 72. 26  | 318. 1  |
| 297. 76 | 36. 03631 | 319. 17 | 72. 233 | 318. 27 |
| 297. 93 | 36. 02951 | 319. 35 | 72. 22  | 318. 44 |
| 298. 1  | 36. 02271 | 319. 52 | 72. 178 | 318. 61 |
| 298. 27 | 36. 01761 | 319. 69 | 72. 165 | 318. 78 |
| 298. 44 | 36. 00741 | 319. 86 | 72. 133 | 318. 96 |

|        |          |        |        |        |
|--------|----------|--------|--------|--------|
| 298.61 | 36.00061 | 320.03 | 72.115 | 319.13 |
| 298.78 | 35.99211 | 320.2  | 72.085 | 319.3  |
| 298.95 | 35.98361 | 320.37 | 72.073 | 319.47 |
| 299.12 | 35.97511 | 320.54 | 72.041 | 319.64 |
| 299.29 | 35.96491 | 320.71 | 72.016 | 319.81 |
| 299.46 | 35.95981 | 320.88 | 71.988 | 319.98 |
| 299.63 | 35.95131 | 321.05 | 71.968 | 320.15 |
| 299.8  | 35.94451 | 321.22 | 71.943 | 320.32 |
| 299.97 | 35.93431 | 321.39 | 71.923 | 320.49 |
| 300.14 | 35.92751 | 321.56 | 71.886 | 320.66 |
| 300.31 | 35.92071 | 321.73 | 71.878 | 320.83 |
| 300.48 | 35.91221 | 321.91 | 71.851 | 321    |
| 300.65 | 35.90541 | 322.08 | 71.826 | 321.17 |
| 300.82 | 35.90031 | 322.25 | 71.803 | 321.34 |
| 300.99 | 35.89351 | 322.42 | 71.783 | 321.51 |
| 301.15 | 35.88671 | 322.59 | 71.751 | 321.68 |
| 301.32 | 35.87991 | 322.76 | 71.726 | 321.85 |
| 301.49 | 35.87141 | 322.93 | 71.706 | 322.03 |
| 301.66 | 35.86291 | 323.1  | 71.669 | 322.2  |
| 301.83 | 35.85441 | 323.27 | 71.664 | 322.37 |
| 302    | 35.84761 | 323.44 | 71.631 | 322.54 |
| 302.17 | 35.84591 | 323.61 | 71.606 | 322.71 |
| 302.34 | 35.84081 | 323.78 | 71.589 | 322.88 |
| 302.51 | 35.83401 | 323.95 | 71.566 | 323.05 |
| 302.68 | 35.82211 | 324.12 | 71.539 | 323.22 |
| 302.85 | 35.81531 | 324.3  | 71.514 | 323.39 |
| 303.02 | 35.80851 | 324.47 | 71.489 | 323.56 |
| 303.19 | 35.80341 | 324.64 | 71.464 | 323.73 |
| 303.36 | 35.80001 | 324.81 | 71.444 | 323.9  |
| 303.53 | 35.79151 | 324.98 | 71.424 | 324.07 |
| 303.7  | 35.78811 | 325.15 | 71.409 | 324.25 |
| 303.87 | 35.78301 | 325.32 | 71.381 | 324.42 |
| 304.04 | 35.77621 | 325.49 | 71.347 | 324.59 |
| 304.21 | 35.76941 | 325.66 | 71.329 | 324.76 |
| 304.38 | 35.76091 | 325.83 | 71.312 | 324.93 |
| 304.55 | 35.75581 | 326    | 71.284 | 325.1  |
| 304.72 | 35.75071 | 326.17 | 71.262 | 325.27 |
| 304.89 | 35.74391 | 326.35 | 71.239 | 325.44 |
| 305.06 | 35.73881 | 326.52 | 71.207 | 325.61 |
| 305.23 | 35.73201 | 326.69 | 71.187 | 325.78 |
| 305.4  | 35.72861 | 326.86 | 71.174 | 325.95 |
| 305.57 | 35.72351 | 327.03 | 71.154 | 326.13 |
| 305.74 | 35.71331 | 327.2  | 71.119 | 326.3  |
| 305.91 | 35.70481 | 327.37 | 71.097 | 326.47 |
| 306.08 | 35.69801 | 327.54 | 71.079 | 326.64 |
| 306.25 | 35.69461 | 327.71 | 71.067 | 326.81 |
| 306.42 | 35.68441 | 327.88 | 71.042 | 326.98 |
| 306.59 | 35.67931 | 328.06 | 71.007 | 327.15 |
| 306.76 | 35.67251 | 328.23 | 70.985 | 327.32 |
| 306.93 | 35.66911 | 328.4  | 70.967 | 327.49 |
| 307.1  | 35.66231 | 328.57 | 70.95  | 327.66 |
| 307.27 | 35.65721 | 328.74 | 70.92  | 327.83 |
| 307.44 | 35.64531 | 328.91 | 70.902 | 328.01 |
| 307.61 | 35.64021 | 329.08 | 70.872 | 328.18 |



|         |           |         |         |         |
|---------|-----------|---------|---------|---------|
| 307. 78 | 35. 63851 | 329. 25 | 70. 85  | 328. 35 |
| 307. 95 | 35. 63341 | 329. 42 | 70. 835 | 328. 52 |
| 308. 12 | 35. 62492 | 329. 59 | 70. 81  | 328. 69 |
| 308. 29 | 35. 61642 | 329. 76 | 70. 777 | 328. 86 |
| 308. 46 | 35. 60962 | 329. 93 | 70. 762 | 329. 03 |
| 308. 63 | 35. 60452 | 330. 1  | 70. 735 | 329. 2  |
| 308. 8  | 35. 60112 | 330. 28 | 70. 722 | 329. 37 |
| 308. 97 | 35. 59602 | 330. 45 | 70. 702 | 329. 54 |
| 309. 14 | 35. 59092 | 330. 62 | 70. 675 | 329. 71 |
| 309. 31 | 35. 58582 | 330. 79 | 70. 653 | 329. 88 |
| 309. 49 | 35. 57732 | 330. 96 | 70. 63  | 330. 05 |
| 309. 66 | 35. 57222 | 331. 13 | 70. 618 | 330. 22 |
| 309. 83 | 35. 56202 | 331. 3  | 70. 6   | 330. 39 |
| 310     | 35. 55352 | 331. 47 | 70. 578 | 330. 56 |
| 310. 17 | 35. 54332 | 331. 64 | 70. 545 | 330. 73 |
| 310. 34 | 35. 53992 | 331. 81 | 70. 52  | 330. 9  |
| 310. 51 | 35. 53482 | 331. 98 | 70. 505 | 331. 07 |
| 310. 68 | 35. 53142 | 332. 15 | 70. 485 | 331. 24 |
| 310. 85 | 35. 52632 | 332. 32 | 70. 46  | 331. 41 |
| 311. 02 | 35. 52292 | 332. 49 | 70. 438 | 331. 59 |
| 311. 19 | 35. 51612 | 332. 66 | 70. 413 | 331. 76 |
| 311. 36 | 35. 50932 | 332. 83 | 70. 4   | 331. 93 |
| 311. 53 | 35. 50252 | 333     | 70. 385 | 332. 1  |
| 311. 7  | 35. 49572 | 333. 17 | 70. 363 | 332. 27 |
| 311. 87 | 35. 48892 | 333. 34 | 70. 341 | 332. 44 |
| 312. 04 | 35. 48382 | 333. 51 | 70. 311 | 332. 61 |
| 312. 21 | 35. 48042 | 333. 69 | 70. 291 | 332. 78 |
| 312. 38 | 35. 47532 | 333. 86 | 70. 278 | 332. 95 |
| 312. 55 | 35. 46852 | 334. 03 | 70. 256 | 333. 12 |
| 312. 72 | 35. 46002 | 334. 2  | 70. 228 | 333. 29 |
| 312. 89 | 35. 45492 | 334. 37 | 70. 203 | 333. 46 |
| 313. 06 | 35. 44982 | 334. 54 | 70. 186 | 333. 63 |
| 313. 23 | 35. 44642 | 334. 71 | 70. 171 | 333. 8  |
| 313. 4  | 35. 44132 | 334. 88 | 70. 151 | 333. 97 |
| 313. 57 | 35. 43452 | 335. 05 | 70. 123 | 334. 14 |
| 313. 74 | 35. 42942 | 335. 22 | 70. 103 | 334. 31 |
| 313. 91 | 35. 42092 | 335. 39 | 70. 088 | 334. 48 |
| 314. 08 | 35. 41582 | 335. 56 | 70. 081 | 334. 65 |
| 314. 25 | 35. 41242 | 335. 73 | 70. 048 | 334. 82 |
| 314. 42 | 35. 40392 | 335. 9  | 70. 023 | 334. 99 |
| 314. 59 | 35. 40052 | 336. 07 | 70. 001 | 335. 16 |
| 314. 76 | 35. 39032 | 336. 24 | 69. 976 | 335. 33 |
| 314. 93 | 35. 38692 | 336. 41 | 69. 956 | 335. 5  |
| 315. 1  | 35. 38012 | 336. 58 | 69. 944 | 335. 67 |
| 315. 28 | 35. 37672 | 336. 75 | 69. 909 | 335. 84 |
| 315. 45 | 35. 36992 | 336. 92 | 69. 896 | 336. 01 |
| 315. 62 | 35. 36312 | 337. 09 | 69. 879 | 336. 18 |
| 315. 79 | 35. 35802 | 337. 26 | 69. 861 | 336. 35 |
| 315. 96 | 35. 35292 | 337. 43 | 69. 844 | 336. 52 |
| 316. 13 | 35. 34442 | 337. 6  | 69. 819 | 336. 69 |
| 316. 3  | 35. 33592 | 337. 77 | 69. 786 | 336. 86 |
| 316. 47 | 35. 32742 | 337. 94 | 69. 764 | 337. 03 |
| 316. 64 | 35. 32232 | 338. 11 | 69. 751 | 337. 21 |
| 316. 81 | 35. 31722 | 338. 29 | 69. 726 | 337. 38 |

|        |          |        |        |        |
|--------|----------|--------|--------|--------|
| 316.98 | 35.31212 | 338.46 | 69.704 | 337.55 |
| 317.15 | 35.30532 | 338.63 | 69.691 | 337.72 |
| 317.32 | 35.30192 | 338.8  | 69.671 | 337.89 |
| 317.49 | 35.29512 | 338.97 | 69.649 | 338.06 |
| 317.66 | 35.28662 | 339.14 | 69.632 | 338.23 |
| 317.83 | 35.27982 | 339.31 | 69.612 | 338.4  |
| 318    | 35.27302 | 339.48 | 69.592 | 338.57 |
| 318.17 | 35.26622 | 339.65 | 69.574 | 338.74 |
| 318.34 | 35.26282 | 339.82 | 69.554 | 338.91 |
| 318.51 | 35.26112 | 339.99 | 69.534 | 339.08 |
| 318.68 | 35.25772 | 340.16 | 69.514 | 339.25 |
| 318.85 | 35.25432 | 340.33 | 69.497 | 339.42 |
| 319.02 | 35.24582 | 340.5  | 69.479 | 339.59 |
| 319.19 | 35.24072 | 340.67 | 69.464 | 339.76 |
| 319.37 | 35.23562 | 340.84 | 69.447 | 339.93 |
| 319.54 | 35.23222 | 341.01 | 69.432 | 340.1  |
| 319.71 | 35.22372 | 341.18 | 69.402 | 340.27 |
| 319.88 | 35.21862 | 341.35 | 69.377 | 340.44 |
| 320.05 | 35.21182 | 341.52 | 69.357 | 340.61 |
| 320.22 | 35.20332 | 341.69 | 69.342 | 340.78 |
| 320.39 | 35.19992 | 341.86 | 69.319 | 340.95 |
| 320.56 | 35.19142 | 342.03 | 69.305 | 341.12 |
| 320.73 | 35.18632 | 342.2  | 69.272 | 341.29 |
| 320.9  | 35.18292 | 342.37 | 69.265 | 341.47 |
| 321.07 | 35.17782 | 342.54 | 69.237 | 341.64 |
| 321.24 | 35.17102 | 342.71 | 69.217 | 341.81 |
| 321.41 | 35.16932 | 342.88 | 69.197 | 341.98 |
| 321.58 | 35.16252 | 343.05 | 69.172 | 342.15 |
| 321.75 | 35.15402 | 343.23 | 69.152 | 342.32 |
| 321.93 | 35.14892 | 343.4  | 69.145 | 342.49 |
| 322.1  | 35.14212 | 343.57 | 69.117 | 342.66 |
| 322.27 | 35.13532 | 343.74 | 69.097 | 342.83 |
| 322.44 | 35.13022 | 343.91 | 69.077 | 343    |
| 322.61 | 35.12342 | 344.08 | 69.065 | 343.17 |
| 322.78 | 35.11832 | 344.25 | 69.037 | 343.34 |
| 322.95 | 35.11322 | 344.42 | 69.025 | 343.51 |
| 323.12 | 35.10982 | 344.59 | 69.005 | 343.68 |
| 323.29 | 35.10302 | 344.76 | 68.98  | 343.85 |
| 323.46 | 35.09792 | 344.93 | 68.958 | 344.02 |
| 323.63 | 35.08942 | 345.1  | 68.94  | 344.19 |
| 323.8  | 35.08432 | 345.27 | 68.93  | 344.36 |
| 323.97 | 35.07922 | 345.44 | 68.913 | 344.54 |
| 324.14 | 35.07582 | 345.61 | 68.893 | 344.71 |
| 324.32 | 35.07072 | 345.78 | 68.868 | 344.88 |
| 324.49 | 35.06222 | 345.95 | 68.85  | 345.05 |
| 324.66 | 35.05712 | 346.12 | 68.833 | 345.22 |
| 324.83 | 35.05202 | 346.29 | 68.808 | 345.39 |
| 325    | 35.04862 | 346.46 | 68.793 | 345.56 |
| 325.17 | 35.04352 | 346.63 | 68.775 | 345.73 |
| 325.34 | 35.03672 | 346.8  | 68.758 | 345.9  |
| 325.51 | 35.02822 | 346.97 | 68.74  | 346.07 |
| 325.68 | 35.02822 | 347.15 | 68.713 | 346.24 |
| 325.85 | 35.02312 | 347.32 | 68.688 | 346.41 |
| 326.02 | 35.01632 | 347.49 | 68.673 | 346.58 |

|         |           |         |         |         |
|---------|-----------|---------|---------|---------|
| 326. 19 | 35. 01292 | 347. 66 | 68. 65  | 346. 75 |
| 326. 37 | 35. 00102 | 347. 83 | 68. 63  | 346. 92 |
| 326. 54 | 34. 99422 | 348     | 68. 613 | 347. 09 |
| 326. 71 | 34. 98742 | 348. 17 | 68. 593 | 347. 27 |
| 326. 88 | 34. 98232 | 348. 34 | 68. 571 | 347. 44 |
| 327. 05 | 34. 97892 | 348. 51 | 68. 551 | 347. 61 |
| 327. 22 | 34. 97382 | 348. 68 | 68. 531 | 347. 78 |
| 327. 39 | 34. 96702 | 348. 85 | 68. 513 | 347. 95 |
| 327. 56 | 34. 96192 | 349. 02 | 68. 488 | 348. 12 |
| 327. 73 | 34. 95512 | 349. 19 | 68. 468 | 348. 29 |
| 327. 9  | 34. 95002 | 349. 36 | 68. 456 | 348. 46 |
| 328. 07 | 34. 94152 | 349. 53 | 68. 433 | 348. 63 |
| 328. 24 | 34. 93642 | 349. 7  | 68. 418 | 348. 8  |
| 328. 41 | 34. 93302 | 349. 88 | 68. 383 | 348. 97 |
| 328. 58 | 34. 92792 | 350. 05 | 68. 368 | 349. 14 |
| 328. 75 | 34. 92282 | 350. 22 | 68. 346 | 349. 31 |
| 328. 92 | 34. 91432 | 350. 39 | 68. 336 | 349. 48 |
| 329. 1  | 34. 90922 | 350. 56 | 68. 313 | 349. 65 |
| 329. 27 | 34. 90582 | 350. 73 | 68. 293 | 349. 82 |
| 329. 44 | 34. 90072 | 350. 9  | 68. 261 | 350     |
| 329. 61 | 34. 89562 | 351. 07 | 68. 241 | 350. 17 |
| 329. 78 | 34. 89052 | 351. 24 | 68. 221 | 350. 34 |
| 329. 95 | 34. 88032 | 351. 41 | 68. 214 | 350. 51 |
| 330. 12 | 34. 87352 | 351. 58 | 68. 199 | 350. 68 |
| 330. 29 | 34. 86842 | 351. 75 | 68. 174 | 350. 85 |
| 330. 46 | 34. 86332 | 351. 92 | 68. 151 | 351. 02 |
| 330. 63 | 34. 85992 | 352. 09 | 68. 136 | 351. 19 |
| 330. 8  | 34. 85482 | 352. 26 | 68. 124 | 351. 36 |
| 330. 97 | 34. 84972 | 352. 43 | 68. 094 | 351. 53 |
| 331. 14 | 34. 84632 | 352. 61 | 68. 071 | 351. 7  |
| 331. 31 | 34. 84292 | 352. 78 | 68. 056 | 351. 87 |
| 331. 48 | 34. 83612 | 352. 95 | 68. 026 | 352. 04 |
| 331. 65 | 34. 82932 | 353. 12 | 68. 009 | 352. 21 |
| 331. 82 | 34. 82422 | 353. 29 | 67. 991 | 352. 39 |
| 331. 99 | 34. 81572 | 353. 46 | 67. 961 | 352. 56 |
| 332. 16 | 34. 81232 | 353. 63 | 67. 946 | 352. 73 |
| 332. 33 | 34. 80552 | 353. 8  | 67. 927 | 352. 9  |
| 332. 51 | 34. 80042 | 353. 97 | 67. 909 | 353. 07 |
| 332. 68 | 34. 79532 | 354. 14 | 67. 887 | 353. 24 |
| 332. 85 | 34. 79192 | 354. 31 | 67. 859 | 353. 41 |
| 333. 02 | 34. 78512 | 354. 48 | 67. 839 | 353. 58 |
| 333. 19 | 34. 77832 | 354. 65 | 67. 827 | 353. 75 |
| 333. 36 | 34. 77152 | 354. 82 | 67. 814 | 353. 92 |
| 333. 53 | 34. 76472 | 354. 99 | 67. 777 | 354. 09 |
| 333. 7  | 34. 76132 | 355. 17 | 67. 762 | 354. 26 |
| 333. 87 | 34. 75452 | 355. 34 | 67. 737 | 354. 43 |
| 334. 04 | 34. 75112 | 355. 51 | 67. 729 | 354. 61 |
| 334. 21 | 34. 74602 | 355. 68 | 67. 707 | 354. 78 |
| 334. 38 | 34. 74092 | 355. 85 | 67. 682 | 354. 95 |
| 334. 55 | 34. 73242 | 356. 02 | 67. 657 | 355. 12 |
| 334. 72 | 34. 72732 | 356. 19 | 67. 637 | 355. 29 |
| 334. 89 | 34. 72222 | 356. 36 | 67. 619 | 355. 46 |
| 335. 06 | 34. 71882 | 356. 53 | 67. 597 | 355. 63 |
| 335. 23 | 34. 70862 | 356. 7  | 67. 572 | 355. 8  |

|         |           |         |         |         |
|---------|-----------|---------|---------|---------|
| 335. 4  | 34. 70522 | 356. 87 | 67. 54  | 355. 97 |
| 335. 57 | 34. 70012 | 357. 04 | 67. 515 | 356. 14 |
| 335. 74 | 34. 69672 | 357. 21 | 67. 495 | 356. 31 |
| 335. 91 | 34. 69162 | 357. 38 | 67. 485 | 356. 48 |
| 336. 08 | 34. 68312 | 357. 55 | 67. 465 | 356. 65 |
| 336. 25 | 34. 67802 | 357. 72 | 67. 447 | 356. 83 |
| 336. 42 | 34. 67292 | 357. 9  | 67. 415 | 357     |
| 336. 59 | 34. 66612 | 358. 07 | 67. 397 | 357. 17 |
| 336. 76 | 34. 66272 | 358. 24 | 67. 377 | 357. 34 |
| 336. 93 | 34. 65592 | 358. 41 | 67. 36  | 357. 51 |
| 337. 1  | 34. 65252 | 358. 58 | 67. 33  | 357. 68 |
| 337. 27 | 34. 64912 | 358. 75 | 67. 3   | 357. 85 |
| 337. 44 | 34. 64232 | 358. 92 | 67. 285 | 358. 02 |
| 337. 61 | 34. 63382 | 359. 09 | 67. 27  | 358. 19 |
| 337. 78 | 34. 62702 | 359. 26 | 67. 24  | 358. 36 |
| 337. 95 | 34. 62192 | 359. 43 | 67. 22  | 358. 53 |
| 338. 12 | 34. 61852 | 359. 6  | 67. 195 | 358. 7  |
| 338. 29 | 34. 61172 | 359. 77 | 67. 175 | 358. 87 |
| 338. 46 | 34. 60832 | 359. 94 | 67. 163 | 359. 04 |
| 338. 63 | 34. 60322 | 360. 11 | 67. 133 | 359. 21 |
| 338. 81 | 34. 59642 | 360. 28 | 67. 113 | 359. 39 |
| 338. 98 | 34. 59132 | 360. 46 | 67. 085 | 359. 56 |
| 339. 15 | 34. 58452 | 360. 63 | 67. 058 | 359. 73 |
| 339. 32 | 34. 58112 | 360. 8  | 67. 035 | 359. 9  |
| 339. 49 | 34. 57602 | 360. 97 | 67. 025 | 360. 07 |
| 339. 66 | 34. 57262 | 361. 14 | 66. 995 | 360. 24 |
| 339. 83 | 34. 56752 | 361. 31 | 66. 973 | 360. 41 |
| 340     | 34. 56412 | 361. 48 | 66. 948 | 360. 58 |
| 340. 17 | 34. 55732 | 361. 65 | 66. 915 | 360. 75 |
| 340. 34 | 34. 55392 | 361. 82 | 66. 896 | 360. 92 |
| 340. 51 | 34. 54372 | 361. 99 | 66. 878 | 361. 09 |
| 340. 68 | 34. 53862 | 362. 16 | 66. 853 | 361. 26 |
| 340. 85 | 34. 53352 | 362. 33 | 66. 818 | 361. 43 |
| 341. 02 | 34. 52672 | 362. 5  | 66. 796 | 361. 6  |
| 341. 19 | 34. 52502 | 362. 67 | 66. 788 | 361. 77 |
| 341. 36 | 34. 51992 | 362. 84 | 66. 758 | 361. 95 |
| 341. 53 | 34. 51482 | 363. 02 | 66. 731 | 362. 12 |
| 341. 7  | 34. 50972 | 363. 19 | 66. 708 | 362. 29 |
| 341. 87 | 34. 50462 | 363. 36 | 66. 693 | 362. 46 |
| 342. 04 | 34. 49782 | 363. 53 | 66. 666 | 362. 63 |
| 342. 21 | 34. 49442 | 363. 7  | 66. 646 | 362. 8  |
| 342. 38 | 34. 49102 | 363. 87 | 66. 626 | 362. 97 |
| 342. 55 | 34. 48422 | 364. 04 | 66. 591 | 363. 14 |
| 342. 72 | 34. 48082 | 364. 21 | 66. 561 | 363. 31 |
| 342. 89 | 34. 47742 | 364. 38 | 66. 546 | 363. 48 |
| 343. 07 | 34. 47232 | 364. 55 | 66. 514 | 363. 65 |
| 343. 24 | 34. 46552 | 364. 72 | 66. 489 | 363. 82 |
| 343. 41 | 34. 45872 | 364. 89 | 66. 466 | 363. 99 |
| 343. 58 | 34. 45192 | 365. 06 | 66. 434 | 364. 16 |
| 343. 75 | 34. 44682 | 365. 23 | 66. 416 | 364. 33 |
| 343. 92 | 34. 44002 | 365. 4  | 66. 391 | 364. 5  |
| 344. 09 | 34. 43662 | 365. 57 | 66. 369 | 364. 67 |
| 344. 26 | 34. 42812 | 365. 75 | 66. 336 | 364. 84 |
| 344. 43 | 34. 42132 | 365. 92 | 66. 321 | 365. 01 |

|         |           |         |         |         |
|---------|-----------|---------|---------|---------|
| 344. 6  | 34. 41622 | 366. 09 | 66. 291 | 365. 18 |
| 344. 77 | 34. 40942 | 366. 26 | 66. 276 | 365. 36 |
| 344. 94 | 34. 40432 | 366. 43 | 66. 246 | 365. 53 |
| 345. 11 | 34. 39752 | 366. 6  | 66. 214 | 365. 7  |
| 345. 28 | 34. 39242 | 366. 77 | 66. 182 | 365. 87 |
| 345. 45 | 34. 38732 | 366. 94 | 66. 159 | 366. 04 |
| 345. 62 | 34. 38392 | 367. 11 | 66. 142 | 366. 21 |
| 345. 79 | 34. 37882 | 367. 28 | 66. 119 | 366. 38 |
| 345. 96 | 34. 37542 | 367. 45 | 66. 097 | 366. 55 |
| 346. 14 | 34. 37203 | 367. 62 | 66. 049 | 366. 72 |
| 346. 31 | 34. 36693 | 367. 79 | 66. 029 | 366. 89 |
| 346. 48 | 34. 36183 | 367. 96 | 66. 004 | 367. 06 |
| 346. 65 | 34. 35503 | 368. 13 | 65. 987 | 367. 23 |
| 346. 82 | 34. 34993 | 368. 3  | 65. 952 | 367. 4  |
| 346. 99 | 34. 34483 | 368. 47 | 65. 917 | 367. 57 |
| 347. 16 | 34. 33803 | 368. 65 | 65. 887 | 367. 74 |
| 347. 33 | 34. 32953 | 368. 82 | 65. 872 | 367. 91 |
| 347. 5  | 34. 32613 | 368. 99 | 65. 845 | 368. 08 |
| 347. 67 | 34. 31763 | 369. 16 | 65. 812 | 368. 25 |
| 347. 84 | 34. 31253 | 369. 33 | 65. 785 | 368. 43 |
| 348. 01 | 34. 30913 | 369. 5  | 65. 755 | 368. 6  |
| 348. 18 | 34. 30573 | 369. 67 | 65. 732 | 368. 77 |
| 348. 35 | 34. 29893 | 369. 84 | 65. 712 | 368. 94 |
| 348. 52 | 34. 29383 | 370. 01 | 65. 682 | 369. 11 |
| 348. 69 | 34. 28703 | 370. 18 | 65. 645 | 369. 28 |
| 348. 87 | 34. 28193 | 370. 35 | 65. 62  | 369. 45 |
| 349. 04 | 34. 27513 | 370. 52 | 65. 59  | 369. 62 |
| 349. 21 | 34. 26833 | 370. 69 | 65. 577 | 369. 79 |
| 349. 38 | 34. 25983 | 370. 86 | 65. 535 | 369. 96 |
| 349. 55 | 34. 25813 | 371. 03 | 65. 505 | 370. 13 |
| 349. 72 | 34. 25133 | 371. 2  | 65. 48  | 370. 3  |
| 349. 89 | 34. 24623 | 371. 37 | 65. 448 | 370. 47 |
| 350. 06 | 34. 24283 | 371. 54 | 65. 41  | 370. 64 |
| 350. 23 | 34. 23603 | 371. 71 | 65. 378 | 370. 81 |
| 350. 4  | 34. 23263 | 371. 88 | 65. 345 | 370. 98 |
| 350. 57 | 34. 22753 | 372. 05 | 65. 31  | 371. 15 |
| 350. 74 | 34. 22243 | 372. 23 | 65. 288 | 371. 32 |
| 350. 91 | 34. 21563 | 372. 4  | 65. 245 | 371. 49 |
| 351. 08 | 34. 20713 | 372. 57 | 65. 21  | 371. 66 |
| 351. 25 | 34. 20033 | 372. 74 | 65. 18  | 371. 83 |
| 351. 42 | 34. 19523 | 372. 91 | 65. 148 | 372     |
| 351. 6  | 34. 19183 | 373. 08 | 65. 118 | 372. 17 |
| 351. 77 | 34. 18673 | 373. 25 | 65. 091 | 372. 34 |
| 351. 94 | 34. 17993 | 373. 42 | 65. 053 | 372. 51 |
| 352. 11 | 34. 17483 | 373. 59 | 65. 013 | 372. 69 |
| 352. 28 | 34. 16633 | 373. 76 | 64. 983 | 372. 86 |
| 352. 45 | 34. 16293 | 373. 93 | 64. 941 | 373. 03 |
| 352. 62 | 34. 15443 | 374. 1  | 64. 911 | 373. 2  |
| 352. 79 | 34. 14763 | 374. 27 | 64. 871 | 373. 37 |
| 352. 96 | 34. 14083 | 374. 44 | 64. 836 | 373. 54 |
| 353. 13 | 34. 13403 | 374. 61 | 64. 796 | 373. 71 |
| 353. 3  | 34. 12723 | 374. 78 | 64. 764 | 373. 88 |
| 353. 47 | 34. 12553 | 374. 95 | 64. 719 | 374. 05 |
| 353. 65 | 34. 11873 | 375. 12 | 64. 686 | 374. 22 |

|         |           |         |         |         |
|---------|-----------|---------|---------|---------|
| 353. 82 | 34. 11533 | 375. 29 | 64. 651 | 374. 39 |
| 353. 99 | 34. 10853 | 375. 46 | 64. 604 | 374. 56 |
| 354. 16 | 34. 10343 | 375. 64 | 64. 576 | 374. 73 |
| 354. 33 | 34. 09663 | 375. 81 | 64. 511 | 374. 9  |
| 354. 5  | 34. 09153 | 375. 98 | 64. 469 | 375. 07 |
| 354. 67 | 34. 08303 | 376. 15 | 64. 434 | 375. 24 |
| 354. 84 | 34. 07963 | 376. 32 | 64. 389 | 375. 41 |
| 355. 01 | 34. 07283 | 376. 49 | 64. 347 | 375. 58 |
| 355. 18 | 34. 06603 | 376. 66 | 64. 299 | 375. 75 |
| 355. 35 | 34. 05753 | 376. 83 | 64. 249 | 375. 92 |
| 355. 52 | 34. 04903 | 377     | 64. 202 | 376. 09 |
| 355. 69 | 34. 04393 | 377. 17 | 64. 164 | 376. 26 |
| 355. 87 | 34. 04053 | 377. 34 | 64. 1   | 376. 43 |
| 356. 04 | 34. 03373 | 377. 51 | 64. 05  | 376. 6  |
| 356. 21 | 34. 02863 | 377. 68 | 63. 985 | 376. 78 |
| 356. 38 | 34. 02183 | 377. 85 | 63. 952 | 376. 95 |
| 356. 55 | 34. 01503 | 378. 02 | 63. 897 | 377. 12 |
| 356. 72 | 34. 00993 | 378. 19 | 63. 837 | 377. 29 |
| 356. 89 | 34. 00653 | 378. 36 | 63. 773 | 377. 46 |
| 357. 06 | 33. 99973 | 378. 53 | 63. 72  | 377. 63 |
| 357. 23 | 33. 99463 | 378. 7  | 63. 645 | 377. 8  |
| 357. 4  | 33. 99123 | 378. 87 | 63. 583 | 377. 97 |
| 357. 57 | 33. 98613 | 379. 04 | 63. 523 | 378. 14 |
| 357. 74 | 33. 97933 | 379. 21 | 63. 433 | 378. 31 |
| 357. 91 | 33. 97253 | 379. 38 | 63. 373 | 378. 48 |
| 358. 08 | 33. 96573 | 379. 55 | 63. 301 | 378. 65 |
| 358. 25 | 33. 96063 | 379. 72 | 63. 246 | 378. 82 |
| 358. 42 | 33. 95383 | 379. 89 | 63. 168 | 378. 99 |
| 358. 59 | 33. 94533 | 380. 06 | 63. 094 | 379. 16 |
| 358. 76 | 33. 94023 | 380. 23 | 63. 014 | 379. 33 |
| 358. 94 | 33. 93513 | 380. 4  | 62. 956 | 379. 5  |
| 359. 11 | 33. 92663 | 380. 57 | 62. 876 | 379. 67 |
| 359. 28 | 33. 91643 | 380. 74 | 62. 821 | 379. 84 |
| 359. 45 | 33. 90793 | 380. 91 | 62. 742 | 380. 01 |
| 359. 62 | 33. 90453 | 381. 08 | 62. 677 | 380. 18 |
| 359. 79 | 33. 89943 | 381. 25 | 62. 599 | 380. 35 |
| 359. 96 | 33. 89433 | 381. 42 | 62. 557 | 380. 52 |
| 360. 13 | 33. 89093 | 381. 59 | 62. 497 | 380. 69 |
| 360. 3  | 33. 88413 | 381. 76 | 62. 432 | 380. 86 |
| 360. 47 | 33. 87733 | 381. 93 | 62. 382 | 381. 03 |
| 360. 64 | 33. 87053 | 382. 1  | 62. 32  | 381. 2  |
| 360. 81 | 33. 86373 | 382. 27 | 62. 272 | 381. 37 |
| 360. 98 | 33. 85693 | 382. 45 | 62. 227 | 381. 54 |
| 361. 15 | 33. 85013 | 382. 62 | 62. 185 | 381. 71 |
| 361. 33 | 33. 84163 | 382. 79 | 62. 135 | 381. 88 |
| 361. 5  | 33. 83823 | 382. 96 | 62. 092 | 382. 05 |
| 361. 67 | 33. 83313 | 383. 13 | 62. 055 | 382. 22 |
| 361. 84 | 33. 83143 | 383. 3  | 62. 02  | 382. 39 |
| 362. 01 | 33. 82463 | 383. 47 | 61. 983 | 382. 56 |
| 362. 18 | 33. 81783 | 383. 64 | 61. 95  | 382. 73 |
| 362. 35 | 33. 81103 | 383. 81 | 61. 908 | 382. 9  |
| 362. 52 | 33. 80253 | 383. 98 | 61. 883 | 383. 07 |
| 362. 69 | 33. 79573 | 384. 15 | 61. 838 | 383. 24 |
| 362. 86 | 33. 78723 | 384. 32 | 61. 828 | 383. 41 |

|         |           |         |         |         |
|---------|-----------|---------|---------|---------|
| 363. 03 | 33. 78043 | 384. 49 | 61. 783 | 383. 58 |
| 363. 2  | 33. 77873 | 384. 66 | 61. 765 | 383. 75 |
| 363. 37 | 33. 77363 | 384. 83 | 61. 73  | 383. 92 |
| 363. 54 | 33. 76683 | 385     | 61. 693 | 384. 09 |
| 363. 71 | 33. 75833 | 385. 17 | 61. 678 | 384. 26 |
| 363. 88 | 33. 74983 | 385. 34 | 61. 658 | 384. 43 |
| 364. 05 | 33. 74473 | 385. 51 | 61. 638 | 384. 6  |
| 364. 22 | 33. 73963 | 385. 68 | 61. 603 | 384. 77 |
| 364. 4  | 33. 73453 | 385. 85 | 61. 578 | 384. 94 |
| 364. 57 | 33. 72773 | 386. 02 | 61. 563 | 385. 11 |
| 364. 74 | 33. 72093 | 386. 19 | 61. 546 | 385. 28 |
| 364. 91 | 33. 71243 | 386. 36 | 61. 511 | 385. 45 |
| 365. 08 | 33. 70903 | 386. 53 | 61. 493 | 385. 62 |
| 365. 25 | 33. 70053 | 386. 7  | 61. 473 | 385. 79 |
| 365. 42 | 33. 69373 | 386. 87 | 61. 463 | 385. 96 |
| 365. 59 | 33. 68523 | 387. 04 | 61. 433 | 386. 13 |
| 365. 76 | 33. 68013 | 387. 21 | 61. 418 | 386. 3  |
| 365. 93 | 33. 67503 | 387. 38 | 61. 398 | 386. 47 |
| 366. 1  | 33. 66993 | 387. 55 | 61. 371 | 386. 64 |
| 366. 27 | 33. 66483 | 387. 72 | 61. 349 | 386. 81 |
| 366. 44 | 33. 65803 | 387. 89 | 61. 336 | 386. 98 |
| 366. 61 | 33. 64783 | 388. 06 | 61. 316 | 387. 15 |
| 366. 78 | 33. 63933 | 388. 23 | 61. 304 | 387. 32 |
| 366. 95 | 33. 63083 | 388. 4  | 61. 294 | 387. 49 |
| 367. 12 | 33. 62573 | 388. 57 | 61. 279 | 387. 66 |
| 367. 29 | 33. 62233 | 388. 74 | 61. 256 | 387. 83 |
| 367. 46 | 33. 61553 | 388. 91 | 61. 244 | 388     |
| 367. 64 | 33. 60873 | 389. 08 | 61. 221 | 388. 17 |
| 367. 81 | 33. 60193 | 389. 25 | 61. 201 | 388. 34 |
| 367. 98 | 33. 59173 | 389. 42 | 61. 181 | 388. 51 |
| 368. 15 | 33. 58323 | 389. 59 | 61. 171 | 388. 68 |
| 368. 32 | 33. 57813 | 389. 76 | 61. 154 | 388. 85 |
| 368. 49 | 33. 57643 | 389. 92 | 61. 139 | 389. 02 |
| 368. 66 | 33. 56793 | 390. 09 | 61. 124 | 389. 19 |
| 368. 83 | 33. 56113 | 390. 26 | 61. 114 | 389. 36 |
| 369     | 33. 55093 | 390. 43 | 61. 099 | 389. 53 |
| 369. 17 | 33. 54413 | 390. 6  | 61. 089 | 389. 7  |
| 369. 34 | 33. 53733 | 390. 77 | 61. 069 | 389. 87 |
| 369. 51 | 33. 53223 | 390. 94 | 61. 046 | 390. 04 |
| 369. 68 | 33. 52883 | 391. 11 | 61. 036 | 390. 21 |
| 369. 85 | 33. 52373 | 391. 28 | 61. 022 | 390. 38 |
| 370. 02 | 33. 51353 | 391. 45 | 61. 004 | 390. 55 |
| 370. 19 | 33. 50503 | 391. 62 | 60. 989 | 390. 72 |
| 370. 36 | 33. 49483 | 391. 79 | 60. 972 | 390. 89 |
| 370. 53 | 33. 49143 | 391. 96 | 60. 957 | 391. 06 |
| 370. 7  | 33. 48123 | 392. 13 | 60. 944 | 391. 23 |
| 370. 87 | 33. 47613 | 392. 3  | 60. 927 | 391. 4  |
| 371. 05 | 33. 46593 | 392. 47 | 60. 912 | 391. 57 |
| 371. 22 | 33. 45743 | 392. 64 | 60. 902 | 391. 74 |
| 371. 39 | 33. 45403 | 392. 81 | 60. 892 | 391. 91 |
| 371. 56 | 33. 44723 | 392. 97 | 60. 879 | 392. 07 |
| 371. 73 | 33. 44043 | 393. 14 | 60. 862 | 392. 24 |
| 371. 9  | 33. 43193 | 393. 31 | 60. 839 | 392. 41 |
| 372. 07 | 33. 42173 | 393. 48 | 60. 827 | 392. 58 |

|         |           |         |         |         |
|---------|-----------|---------|---------|---------|
| 372. 24 | 33. 41663 | 393. 65 | 60. 817 | 392. 75 |
| 372. 41 | 33. 40983 | 393. 82 | 60. 802 | 392. 92 |
| 372. 58 | 33. 40303 | 393. 99 | 60. 784 | 393. 09 |
| 372. 75 | 33. 39793 | 394. 16 | 60. 772 | 393. 26 |
| 372. 92 | 33. 38943 | 394. 33 | 60. 762 | 393. 43 |
| 373. 09 | 33. 38263 | 394. 5  | 60. 749 | 393. 6  |
| 373. 26 | 33. 37413 | 394. 67 | 60. 734 | 393. 77 |
| 373. 43 | 33. 36733 | 394. 84 | 60. 727 | 393. 94 |
| 373. 6  | 33. 36223 | 395. 01 | 60. 709 | 394. 11 |
| 373. 77 | 33. 35713 | 395. 18 | 60. 697 | 394. 28 |
| 373. 94 | 33. 35033 | 395. 35 | 60. 68  | 394. 45 |
| 374. 12 | 33. 34523 | 395. 52 | 60. 66  | 394. 62 |
| 374. 29 | 33. 33503 | 395. 68 | 60. 65  | 394. 79 |
| 374. 46 | 33. 32653 | 395. 85 | 60. 627 | 394. 96 |
| 374. 63 | 33. 31633 | 396. 02 | 60. 612 | 395. 13 |
| 374. 8  | 33. 30953 | 396. 19 | 60. 61  | 395. 3  |
| 374. 97 | 33. 30103 | 396. 36 | 60. 592 | 395. 47 |
| 375. 14 | 33. 29593 | 396. 53 | 60. 575 | 395. 64 |
| 375. 31 | 33. 28573 | 396. 7  | 60. 56  | 395. 81 |
| 375. 48 | 33. 27893 | 396. 87 | 60. 55  | 395. 98 |
| 375. 65 | 33. 27383 | 397. 04 | 60. 54  | 396. 15 |
| 375. 82 | 33. 26703 | 397. 21 | 60. 527 | 396. 31 |
| 375. 99 | 33. 26193 | 397. 38 | 60. 51  | 396. 48 |
| 376. 16 | 33. 25513 | 397. 55 | 60. 495 | 396. 65 |
| 376. 33 | 33. 24493 | 397. 72 | 60. 485 | 396. 82 |
| 376. 5  | 33. 23643 | 397. 89 | 60. 467 | 396. 99 |
| 376. 67 | 33. 22963 | 398. 05 | 60. 457 | 397. 16 |
| 376. 84 | 33. 22283 | 398. 22 | 60. 442 | 397. 33 |
| 377. 01 | 33. 21433 | 398. 39 | 60. 427 | 397. 5  |
| 377. 18 | 33. 20923 | 398. 56 | 60. 412 | 397. 67 |
| 377. 35 | 33. 20073 | 398. 73 | 60. 402 | 397. 84 |
| 377. 52 | 33. 19223 | 398. 9  | 60. 382 | 398. 01 |
| 377. 69 | 33. 18373 | 399. 07 | 60. 37  | 398. 18 |
| 377. 87 | 33. 17523 | 399. 24 | 60. 355 | 398. 35 |
| 378. 04 | 33. 16843 | 399. 41 | 60. 345 | 398. 52 |
| 378. 21 | 33. 15823 | 399. 58 | 60. 335 | 398. 69 |
| 378. 38 | 33. 15313 | 399. 75 | 60. 323 | 398. 86 |
| 378. 55 | 33. 14803 | 399. 92 | 60. 303 | 399. 03 |
| 378. 72 | 33. 13953 | 400. 09 | 60. 285 | 399. 2  |
| 378. 89 | 33. 12933 | 400. 25 | 60. 27  | 399. 37 |
| 379. 06 | 33. 11574 | 400. 42 | 60. 26  | 399. 54 |
| 379. 23 | 33. 10894 | 400. 59 | 60. 253 | 399. 71 |
| 379. 4  | 33. 10214 | 400. 76 | 60. 24  | 399. 88 |
| 379. 57 | 33. 09534 | 400. 93 | 60. 225 | 400. 04 |
| 379. 74 | 33. 08854 | 401. 1  | 60. 208 | 400. 21 |
| 379. 91 | 33. 08004 | 401. 27 | 60. 195 | 400. 38 |
| 380. 08 | 33. 07324 | 401. 44 | 60. 18  | 400. 55 |
| 380. 25 | 33. 06134 | 401. 61 | 60. 168 | 400. 72 |
| 380. 42 | 33. 05284 | 401. 78 | 60. 148 | 400. 89 |
| 380. 59 | 33. 05114 | 401. 95 | 60. 133 | 401. 06 |
| 380. 76 | 33. 04264 | 402. 12 | 60. 125 | 401. 23 |
| 380. 93 | 33. 03584 | 402. 28 | 60. 115 | 401. 4  |
| 381. 1  | 33. 02734 | 402. 45 | 60. 1   | 401. 57 |
| 381. 27 | 33. 01884 | 402. 62 | 60. 085 | 401. 74 |



|        |          |        |        |        |
|--------|----------|--------|--------|--------|
| 381.44 | 33.00524 | 402.79 | 60.07  | 401.91 |
| 381.61 | 32.99504 | 402.96 | 60.05  | 402.08 |
| 381.78 | 32.98654 | 403.13 | 60.038 | 402.25 |
| 381.95 | 32.97974 | 403.3  | 60.023 | 402.42 |
| 382.12 | 32.97124 | 403.47 | 60.01  | 402.59 |
| 382.29 | 32.95764 | 403.64 | 59.993 | 402.75 |
| 382.46 | 32.94914 | 403.81 | 59.976 | 402.92 |
| 382.63 | 32.93894 | 403.98 | 59.966 | 403.09 |
| 382.8  | 32.93044 | 404.14 | 59.948 | 403.26 |
| 382.97 | 32.92364 | 404.31 | 59.926 | 403.43 |
| 383.14 | 32.91514 | 404.48 | 59.906 | 403.6  |
| 383.31 | 32.91174 | 404.65 | 59.891 | 403.77 |
| 383.48 | 32.89814 | 404.82 | 59.878 | 403.94 |
| 383.65 | 32.88964 | 404.99 | 59.871 | 404.11 |
| 383.82 | 32.88454 | 405.16 | 59.848 | 404.28 |
| 383.99 | 32.87774 | 405.33 | 59.831 | 404.45 |
| 384.16 | 32.86584 | 405.5  | 59.808 | 404.62 |
| 384.33 | 32.85224 | 405.67 | 59.798 | 404.79 |
| 384.5  | 32.84374 | 405.84 | 59.786 | 404.96 |
| 384.67 | 32.83694 | 406    | 59.776 | 405.13 |
| 384.85 | 32.82674 | 406.17 | 59.748 | 405.29 |
| 385.02 | 32.82334 | 406.34 | 59.731 | 405.46 |
| 385.19 | 32.81654 | 406.51 | 59.716 | 405.63 |
| 385.36 | 32.80634 | 406.68 | 59.713 | 405.8  |
| 385.53 | 32.79444 | 406.85 | 59.691 | 405.97 |
| 385.7  | 32.78594 | 407.02 | 59.673 | 406.14 |
| 385.87 | 32.77914 | 407.19 | 59.656 | 406.31 |
| 386.04 | 32.77404 | 407.36 | 59.636 | 406.48 |
| 386.21 | 32.76554 | 407.52 | 59.621 | 406.65 |
| 386.38 | 32.75364 | 407.69 | 59.606 | 406.82 |
| 386.55 | 32.74344 | 407.86 | 59.586 | 406.99 |
| 386.72 | 32.73664 | 408.03 | 59.571 | 407.16 |
| 386.89 | 32.72644 | 408.2  | 59.554 | 407.32 |
| 387.06 | 32.71964 | 408.37 | 59.539 | 407.49 |
| 387.23 | 32.70774 | 408.54 | 59.521 | 407.66 |
| 387.4  | 32.69754 | 408.71 | 59.514 | 407.83 |
| 387.57 | 32.68564 | 408.88 | 59.489 | 408    |
| 387.74 | 32.67544 | 409.05 | 59.466 | 408.17 |
| 387.91 | 32.66864 | 409.21 | 59.444 | 408.34 |
| 388.08 | 32.66354 | 409.38 | 59.424 | 408.51 |
| 388.25 | 32.65504 | 409.55 | 59.411 | 408.68 |
| 388.42 | 32.64314 | 409.72 | 59.389 | 408.85 |
| 388.59 | 32.63124 | 409.89 | 59.369 | 409.02 |
| 388.76 | 32.62104 | 410.06 | 59.351 | 409.19 |
| 388.93 | 32.61084 | 410.23 | 59.329 | 409.36 |
| 389.1  | 32.60574 | 410.4  | 59.309 | 409.53 |
| 389.27 | 32.59724 | 410.57 | 59.284 | 409.7  |
| 389.44 | 32.58704 | 410.74 | 59.267 | 409.86 |
| 389.61 | 32.57344 | 410.9  | 59.247 | 410.03 |
| 389.78 | 32.56494 | 411.07 | 59.224 | 410.2  |
| 389.95 | 32.55644 | 411.24 | 59.207 | 410.37 |
| 390.12 | 32.54624 | 411.41 | 59.187 | 410.54 |
| 390.29 | 32.53944 | 411.58 | 59.164 | 410.71 |
| 390.46 | 32.52754 | 411.75 | 59.142 | 410.88 |

|        |          |        |        |        |
|--------|----------|--------|--------|--------|
| 390.63 | 32.51394 | 411.92 | 59.124 | 411.05 |
| 390.8  | 32.50204 | 412.09 | 59.102 | 411.22 |
| 390.97 | 32.49184 | 412.26 | 59.074 | 411.39 |
| 391.14 | 32.48334 | 412.42 | 59.052 | 411.56 |
| 391.31 | 32.47144 | 412.59 | 59.037 | 411.73 |
| 391.48 | 32.45784 | 412.76 | 59.014 | 411.89 |
| 391.65 | 32.44934 | 412.93 | 58.989 | 412.06 |
| 391.82 | 32.44594 | 413.1  | 58.967 | 412.23 |
| 391.99 | 32.43404 | 413.27 | 58.942 | 412.4  |
| 392.16 | 32.42214 | 413.44 | 58.922 | 412.57 |
| 392.33 | 32.41024 | 413.61 | 58.897 | 412.74 |
| 392.5  | 32.40174 | 413.78 | 58.872 | 412.91 |
| 392.67 | 32.39494 | 413.95 | 58.85  | 413.08 |
| 392.84 | 32.38304 | 414.11 | 58.83  | 413.25 |
| 393.01 | 32.36944 | 414.28 | 58.81  | 413.42 |
| 393.18 | 32.35584 | 414.45 | 58.79  | 413.58 |
| 393.35 | 32.34564 | 414.62 | 58.767 | 413.75 |
| 393.52 | 32.33884 | 414.79 | 58.75  | 413.92 |
| 393.69 | 32.32864 | 414.96 | 58.725 | 414.09 |
| 393.86 | 32.31844 | 415.13 | 58.7   | 414.26 |
| 394.03 | 32.30654 | 415.3  | 58.662 | 414.43 |
| 394.2  | 32.29464 | 415.46 | 58.645 | 414.6  |
| 394.37 | 32.28614 | 415.63 | 58.63  | 414.77 |
| 394.54 | 32.27764 | 415.8  | 58.6   | 414.94 |
| 394.71 | 32.26064 | 415.97 | 58.578 | 415.11 |
| 394.88 | 32.24364 | 416.14 | 58.558 | 415.28 |
| 395.05 | 32.23514 | 416.31 | 58.535 | 415.44 |
| 395.22 | 32.22664 | 416.48 | 58.51  | 415.61 |
| 395.39 | 32.21644 | 416.65 | 58.493 | 415.78 |
| 395.55 | 32.20284 | 416.82 | 58.47  | 415.95 |
| 395.72 | 32.19094 | 416.98 | 58.46  | 416.12 |
| 395.89 | 32.18074 | 417.15 | 58.428 | 416.29 |
| 396.06 | 32.16884 | 417.32 | 58.403 | 416.46 |
| 396.23 | 32.16374 | 417.49 | 58.38  | 416.63 |
| 396.4  | 32.15014 | 417.66 | 58.365 | 416.8  |
| 396.57 | 32.12974 | 417.83 | 58.348 | 416.97 |
| 396.74 | 32.12294 | 418    | 58.32  | 417.13 |
| 396.91 | 32.11104 | 418.17 | 58.29  | 417.3  |
| 397.08 | 32.09914 | 418.33 | 58.276 | 417.47 |
| 397.25 | 32.08724 | 418.5  | 58.253 | 417.64 |
| 397.42 | 32.07194 | 418.67 | 58.231 | 417.81 |
| 397.59 | 32.06004 | 418.84 | 58.208 | 417.98 |
| 397.76 | 32.04814 | 419.01 | 58.183 | 418.15 |
| 397.93 | 32.03624 | 419.18 | 58.168 | 418.32 |
| 398.1  | 32.02774 | 419.35 | 58.146 | 418.49 |
| 398.27 | 32.01074 | 419.51 | 58.121 | 418.65 |
| 398.44 | 31.99884 | 419.68 | 58.093 | 418.82 |
| 398.61 | 31.98524 | 419.85 | 58.076 | 418.99 |
| 398.78 | 31.97674 | 420.02 | 58.053 | 419.16 |
| 398.95 | 31.96484 | 420.19 | 58.036 | 419.33 |
| 399.12 | 31.95294 | 420.36 | 58.023 | 419.5  |
| 399.29 | 31.94104 | 420.53 | 58.003 | 419.67 |
| 399.46 | 31.92744 | 420.7  | 57.973 | 419.84 |
| 399.63 | 31.91554 | 420.86 | 57.956 | 420.01 |

|        |          |        |        |        |
|--------|----------|--------|--------|--------|
| 399.8  | 31.90364 | 421.03 | 57.931 | 420.17 |
| 399.97 | 31.89004 | 421.2  | 57.911 | 420.34 |
| 400.14 | 31.87305 | 421.37 | 57.889 | 420.51 |
| 400.31 | 31.86285 | 421.54 | 57.879 | 420.68 |
| 400.48 | 31.85265 | 421.71 | 57.851 | 420.85 |
| 400.65 | 31.83055 | 421.88 | 57.824 | 421.02 |
| 400.82 | 31.82035 | 422.04 | 57.809 | 421.19 |
| 400.99 | 31.80505 | 422.21 | 57.786 | 421.36 |
| 401.16 | 31.79655 | 422.38 | 57.766 | 421.53 |
| 401.33 | 31.78295 | 422.55 | 57.744 | 421.7  |
| 401.49 | 31.77445 | 422.72 | 57.724 | 421.86 |
| 401.66 | 31.75575 | 422.89 | 57.699 | 422.03 |
| 401.83 | 31.73535 | 423.06 | 57.684 | 422.2  |
| 402    | 31.71835 | 423.23 | 57.654 | 422.37 |
| 402.17 | 31.71155 | 423.39 | 57.636 | 422.54 |
| 402.34 | 31.69795 | 423.56 | 57.616 | 422.71 |
| 402.51 | 31.68095 | 423.73 | 57.599 | 422.88 |
| 402.68 | 31.66735 | 423.9  | 57.572 | 423.05 |
| 402.85 | 31.65375 | 424.07 | 57.549 | 423.22 |
| 403.02 | 31.63845 | 424.24 | 57.517 | 423.38 |
| 403.19 | 31.62145 | 424.41 | 57.502 | 423.55 |
| 403.36 | 31.60785 | 424.58 | 57.487 | 423.72 |
| 403.53 | 31.59595 | 424.74 | 57.462 | 423.89 |
| 403.7  | 31.58235 | 424.91 | 57.444 | 424.06 |
| 403.87 | 31.57045 | 425.08 | 57.429 | 424.23 |
| 404.04 | 31.55175 | 425.25 | 57.397 | 424.4  |
| 404.21 | 31.53475 | 425.42 | 57.372 | 424.57 |
| 404.38 | 31.52115 | 425.59 | 57.354 | 424.74 |
| 404.55 | 31.51095 | 425.75 | 57.342 | 424.9  |
| 404.72 | 31.49395 | 425.92 | 57.327 | 425.07 |
| 404.89 | 31.47525 | 426.09 | 57.302 | 425.24 |
| 405.06 | 31.45485 | 426.26 | 57.289 | 425.41 |
| 405.23 | 31.43955 | 426.43 | 57.257 | 425.58 |
| 405.39 | 31.42595 | 426.6  | 57.22  | 425.75 |
| 405.56 | 31.41065 | 426.77 | 57.2   | 425.92 |
| 405.73 | 31.39705 | 426.94 | 57.195 | 426.09 |
| 405.9  | 31.38345 | 427.1  | 57.17  | 426.26 |
| 406.07 | 31.35965 | 427.27 | 57.13  | 426.43 |
| 406.24 | 31.34775 | 427.44 | 57.1   | 426.59 |
| 406.41 | 31.33245 | 427.61 | 57.085 | 426.76 |
| 406.58 | 31.32225 | 427.78 | 57.062 | 426.93 |
| 406.75 | 31.30865 | 427.95 | 57.04  | 427.1  |
| 406.92 | 31.29165 | 428.12 | 57.01  | 427.27 |
| 407.09 | 31.27295 | 428.29 | 56.977 | 427.44 |
| 407.26 | 31.25765 | 428.46 | 56.95  | 427.61 |
| 407.43 | 31.23895 | 428.63 | 56.945 | 427.78 |
| 407.6  | 31.22195 | 428.8  | 56.905 | 427.95 |
| 407.77 | 31.20835 | 428.97 | 56.88  | 428.12 |
| 407.94 | 31.18455 | 429.14 | 56.845 | 428.29 |
| 408.11 | 31.16755 | 429.31 | 56.828 | 428.46 |
| 408.28 | 31.15055 | 429.48 | 56.81  | 428.63 |
| 408.45 | 31.13185 | 429.65 | 56.773 | 428.8  |
| 408.61 | 31.11485 | 429.82 | 56.748 | 428.97 |
| 408.78 | 31.09955 | 429.99 | 56.708 | 429.14 |

|        |          |        |        |        |
|--------|----------|--------|--------|--------|
| 408.95 | 31.08425 | 430.16 | 56.683 | 429.31 |
| 409.12 | 31.06555 | 430.32 | 56.665 | 429.48 |
| 409.29 | 31.04855 | 430.49 | 56.638 | 429.65 |
| 409.46 | 31.03665 | 430.66 | 56.603 | 429.82 |
| 409.63 | 31.01285 | 430.83 | 56.573 | 429.99 |
| 409.8  | 30.99755 | 431    | 56.553 | 430.16 |
| 409.97 | 30.97375 | 431.17 | 56.536 | 430.33 |
| 410.14 | 30.95165 | 431.34 | 56.511 | 430.5  |
| 410.31 | 30.93125 | 431.51 | 56.468 | 430.67 |
| 410.48 | 30.91765 | 431.68 | 56.443 | 430.84 |
| 410.65 | 30.90065 | 431.85 | 56.413 | 431.01 |
| 410.82 | 30.88195 | 432.02 | 56.396 | 431.18 |
| 410.99 | 30.87005 | 432.19 | 56.373 | 431.35 |
| 411.15 | 30.84455 | 432.36 | 56.346 | 431.53 |
| 411.32 | 30.82585 | 432.53 | 56.308 | 431.7  |
| 411.49 | 30.80545 | 432.7  | 56.283 | 431.87 |
| 411.66 | 30.78675 | 432.87 | 56.266 | 432.04 |
| 411.83 | 30.76805 | 433.04 | 56.241 | 432.21 |
| 412    | 30.74595 | 433.21 | 56.216 | 432.38 |
| 412.17 | 30.72895 | 433.38 | 56.191 | 432.55 |
| 412.34 | 30.70855 | 433.55 | 56.159 | 432.72 |
| 412.51 | 30.68815 | 433.72 | 56.141 | 432.89 |
| 412.68 | 30.66945 | 433.89 | 56.119 | 433.06 |
| 412.85 | 30.65245 | 434.07 | 56.099 | 433.23 |
| 413.02 | 30.63205 | 434.24 | 56.059 | 433.4  |
| 413.19 | 30.60656 | 434.41 | 56.031 | 433.57 |
| 413.36 | 30.59296 | 434.58 | 56.019 | 433.74 |
| 413.53 | 30.57426 | 434.75 | 56.001 | 433.91 |
| 413.7  | 30.55386 | 434.92 | 55.974 | 434.08 |
| 413.87 | 30.53006 | 435.09 | 55.929 | 434.25 |
| 414.03 | 30.50966 | 435.26 | 55.909 | 434.42 |
| 414.2  | 30.49266 | 435.43 | 55.894 | 434.6  |
| 414.37 | 30.47226 | 435.6  | 55.871 | 434.77 |
| 414.54 | 30.44166 | 435.77 | 55.839 | 434.94 |
| 414.71 | 30.41786 | 435.94 | 55.822 | 435.11 |
| 414.88 | 30.40086 | 436.11 | 55.804 | 435.28 |
| 415.05 | 30.38726 | 436.28 | 55.774 | 435.45 |
| 415.22 | 30.36176 | 436.45 | 55.754 | 435.62 |
| 415.39 | 30.33456 | 436.62 | 55.729 | 435.79 |
| 415.56 | 30.32436 | 436.79 | 55.699 | 435.96 |
| 415.73 | 30.29886 | 436.96 | 55.679 | 436.13 |
| 415.9  | 30.27506 | 437.13 | 55.662 | 436.3  |
| 416.07 | 30.25636 | 437.3  | 55.639 | 436.47 |
| 416.24 | 30.23086 | 437.47 | 55.612 | 436.64 |
| 416.4  | 30.20706 | 437.64 | 55.597 | 436.81 |
| 416.57 | 30.18326 | 437.82 | 55.569 | 436.99 |
| 416.74 | 30.16796 | 437.99 | 55.549 | 437.16 |
| 416.91 | 30.13906 | 438.16 | 55.527 | 437.33 |
| 417.08 | 30.11866 | 438.33 | 55.5   | 437.5  |
| 417.25 | 30.10846 | 438.5  | 55.477 | 437.67 |
| 417.42 | 30.07956 | 438.67 | 55.462 | 437.84 |
| 417.59 | 30.05576 | 438.84 | 55.44  | 438.01 |
| 417.76 | 30.02176 | 439.01 | 55.42  | 438.18 |
| 417.93 | 30.00306 | 439.18 | 55.382 | 438.35 |

|         |           |         |         |         |
|---------|-----------|---------|---------|---------|
| 418. 1  | 29. 97246 | 439. 35 | 55. 365 | 438. 52 |
| 418. 27 | 29. 94696 | 439. 52 | 55. 342 | 438. 69 |
| 418. 44 | 29. 92316 | 439. 69 | 55. 315 | 438. 87 |
| 418. 61 | 29. 90616 | 439. 86 | 55. 292 | 439. 04 |
| 418. 77 | 29. 87216 | 440. 03 | 55. 272 | 439. 21 |
| 418. 94 | 29. 86536 | 440. 2  | 55. 255 | 439. 38 |
| 419. 11 | 29. 83306 | 440. 37 | 55. 23  | 439. 55 |
| 419. 28 | 29. 81606 | 440. 55 | 55. 215 | 439. 72 |
| 419. 45 | 29. 77866 | 440. 72 | 55. 197 | 439. 89 |
| 419. 62 | 29. 76676 | 440. 89 | 55. 175 | 440. 06 |
| 419. 79 | 29. 73786 | 441. 06 | 55. 143 | 440. 23 |
| 419. 96 | 29. 71236 | 441. 23 | 55. 12  | 440. 4  |
| 420. 13 | 29. 69026 | 441. 4  | 55. 105 | 440. 58 |
| 420. 3  | 29. 66646 | 441. 57 | 55. 09  | 440. 75 |
| 420. 47 | 29. 63756 | 441. 74 | 55. 06  | 440. 92 |
| 420. 64 | 29. 61546 | 441. 91 | 55. 05  | 441. 09 |
| 420. 81 | 29. 58316 | 442. 08 | 55. 028 | 441. 26 |
| 420. 97 | 29. 55936 | 442. 25 | 55. 003 | 441. 43 |
| 421. 14 | 29. 53386 | 442. 42 | 54. 975 | 441. 6  |
| 421. 31 | 29. 50326 | 442. 59 | 54. 955 | 441. 77 |
| 421. 48 | 29. 48796 | 442. 76 | 54. 935 | 441. 94 |
| 421. 65 | 29. 45736 | 442. 94 | 54. 915 | 442. 11 |
| 421. 82 | 29. 42506 | 443. 11 | 54. 9   | 442. 28 |
| 421. 99 | 29. 40466 | 443. 28 | 54. 88  | 442. 45 |
| 422. 16 | 29. 37746 | 443. 45 | 54. 858 | 442. 63 |
| 422. 33 | 29. 35027 | 443. 62 | 54. 828 | 442. 8  |
| 422. 5  | 29. 32477 | 443. 79 | 54. 813 | 442. 97 |
| 422. 66 | 29. 29587 | 443. 96 | 54. 788 | 443. 14 |
| 422. 83 | 29. 27207 | 444. 13 | 54. 768 | 443. 31 |
| 423     | 29. 24147 | 444. 3  | 54. 746 | 443. 48 |
| 423. 17 | 29. 21767 | 444. 47 | 54. 733 | 443. 65 |
| 423. 34 | 29. 18537 | 444. 64 | 54. 711 | 443. 82 |
| 423. 51 | 29. 17007 | 444. 81 | 54. 691 | 443. 99 |
| 423. 68 | 29. 13267 | 444. 98 | 54. 666 | 444. 16 |
| 423. 85 | 29. 11227 | 445. 15 | 54. 641 | 444. 34 |
| 424. 02 | 29. 09017 | 445. 32 | 54. 621 | 444. 51 |
| 424. 19 | 29. 06467 | 445. 49 | 54. 598 | 444. 68 |
| 424. 36 | 29. 02557 | 445. 66 | 54. 583 | 444. 85 |
| 424. 52 | 29. 00177 | 445. 83 | 54. 558 | 445. 02 |
| 424. 69 | 28. 97287 | 446. 01 | 54. 541 | 445. 19 |
| 424. 86 | 28. 94907 | 446. 18 | 54. 513 | 445. 36 |
| 425. 03 | 28. 92527 | 446. 35 | 54. 493 | 445. 53 |
| 425. 2  | 28. 89637 | 446. 52 | 54. 476 | 445. 7  |
| 425. 37 | 28. 86237 | 446. 69 | 54. 456 | 445. 87 |
| 425. 54 | 28. 82837 | 446. 86 | 54. 426 | 446. 04 |
| 425. 71 | 28. 80117 | 447. 03 | 54. 404 | 446. 22 |
| 425. 88 | 28. 78077 | 447. 2  | 54. 386 | 446. 39 |
| 426. 05 | 28. 75357 | 447. 37 | 54. 364 | 446. 56 |
| 426. 22 | 28. 72467 | 447. 54 | 54. 344 | 446. 73 |
| 426. 39 | 28. 68727 | 447. 71 | 54. 321 | 446. 9  |
| 426. 56 | 28. 64817 | 447. 88 | 54. 309 | 447. 07 |
| 426. 72 | 28. 62437 | 448. 05 | 54. 279 | 447. 24 |
| 426. 89 | 28. 59717 | 448. 22 | 54. 269 | 447. 41 |
| 427. 06 | 28. 57847 | 448. 4  | 54. 239 | 447. 58 |

|         |           |         |         |         |
|---------|-----------|---------|---------|---------|
| 427. 23 | 28. 54277 | 448. 57 | 54. 219 | 447. 75 |
| 427. 4  | 28. 50707 | 448. 74 | 54. 194 | 447. 92 |
| 427. 57 | 28. 47647 | 448. 91 | 54. 174 | 448. 1  |
| 427. 74 | 28. 45437 | 449. 08 | 54. 154 | 448. 27 |
| 427. 91 | 28. 42377 | 449. 25 | 54. 129 | 448. 44 |
| 428. 08 | 28. 39997 | 449. 42 | 54. 114 | 448. 61 |
| 428. 25 | 28. 36257 | 449. 59 | 54. 089 | 448. 78 |
| 428. 42 | 28. 33877 | 449. 76 | 54. 069 | 448. 95 |
| 428. 59 | 28. 29967 | 449. 93 | 54. 047 | 449. 12 |
| 428. 76 | 28. 27417 | 450. 1  | 54. 029 | 449. 29 |
| 428. 93 | 28. 24867 | 450. 27 | 54. 004 | 449. 46 |
| 429. 1  | 28. 22317 | 450. 44 | 53. 982 | 449. 63 |
| 429. 27 | 28. 19087 | 450. 61 | 53. 959 | 449. 8  |
| 429. 44 | 28. 15517 | 450. 78 | 53. 942 | 449. 98 |
| 429. 61 | 28. 12118 | 450. 96 | 53. 924 | 450. 15 |
| 429. 78 | 28. 08888 | 451. 13 | 53. 899 | 450. 32 |
| 429. 95 | 28. 05488 | 451. 3  | 53. 887 | 450. 49 |
| 430. 12 | 28. 02768 | 451. 47 | 53. 862 | 450. 66 |
| 430. 29 | 28. 00218 | 451. 64 | 53. 839 | 450. 83 |
| 430. 46 | 27. 96308 | 451. 81 | 53. 812 | 451     |
| 430. 63 | 27. 93078 | 451. 98 | 53. 782 | 451. 17 |
| 430. 8  | 27. 90018 | 452. 15 | 53. 77  | 451. 34 |
| 430. 97 | 27. 87128 | 452. 32 | 53. 745 | 451. 51 |
| 431. 14 | 27. 83728 | 452. 49 | 53. 732 | 451. 68 |
| 431. 31 | 27. 79988 | 452. 66 | 53. 71  | 451. 85 |
| 431. 48 | 27. 76588 | 452. 83 | 53. 69  | 452. 02 |
| 431. 65 | 27. 74548 | 453     | 53. 66  | 452. 19 |
| 431. 82 | 27. 70128 | 453. 17 | 53. 642 | 452. 37 |
| 431. 99 | 27. 67068 | 453. 34 | 53. 617 | 452. 54 |
| 432. 16 | 27. 64688 | 453. 52 | 53. 607 | 452. 71 |
| 432. 33 | 27. 60778 | 453. 69 | 53. 582 | 452. 88 |
| 432. 51 | 27. 58058 | 453. 86 | 53. 552 | 453. 05 |
| 432. 68 | 27. 54318 | 454. 03 | 53. 542 | 453. 22 |
| 432. 85 | 27. 50238 | 454. 2  | 53. 52  | 453. 39 |
| 433. 02 | 27. 47858 | 454. 37 | 53. 495 | 453. 56 |
| 433. 19 | 27. 43948 | 454. 54 | 53. 465 | 453. 73 |
| 433. 36 | 27. 41738 | 454. 71 | 53. 448 | 453. 9  |
| 433. 53 | 27. 37828 | 454. 88 | 53. 428 | 454. 07 |
| 433. 7  | 27. 34938 | 455. 05 | 53. 408 | 454. 24 |
| 433. 87 | 27. 30688 | 455. 22 | 53. 39  | 454. 41 |
| 434. 04 | 27. 27288 | 455. 39 | 53. 368 | 454. 58 |
| 434. 21 | 27. 24058 | 455. 56 | 53. 34  | 454. 76 |
| 434. 38 | 27. 21338 | 455. 73 | 53. 318 | 454. 93 |
| 434. 55 | 27. 18108 | 455. 9  | 53. 3   | 455. 1  |
| 434. 72 | 27. 14028 | 456. 07 | 53. 28  | 455. 27 |
| 434. 89 | 27. 10798 | 456. 25 | 53. 26  | 455. 44 |
| 435. 06 | 27. 07398 | 456. 42 | 53. 238 | 455. 61 |
| 435. 23 | 27. 03658 | 456. 59 | 53. 223 | 455. 78 |
| 435. 4  | 27. 00598 | 456. 76 | 53. 2   | 455. 95 |
| 435. 57 | 26. 97368 | 456. 93 | 53. 183 | 456. 12 |
| 435. 74 | 26. 93628 | 457. 1  | 53. 16  | 456. 29 |
| 435. 91 | 26. 90058 | 457. 27 | 53. 138 | 456. 46 |
| 436. 08 | 26. 85469 | 457. 44 | 53. 12  | 456. 63 |
| 436. 25 | 26. 82919 | 457. 61 | 53. 098 | 456. 8  |

|         |           |         |         |         |
|---------|-----------|---------|---------|---------|
| 436. 42 | 26. 80199 | 457. 78 | 53. 081 | 456. 98 |
| 436. 59 | 26. 76459 | 457. 95 | 53. 058 | 457. 15 |
| 436. 76 | 26. 72039 | 458. 12 | 53. 031 | 457. 32 |
| 436. 93 | 26. 68299 | 458. 29 | 53. 016 | 457. 49 |
| 437. 1  | 26. 65919 | 458. 46 | 52. 996 | 457. 66 |
| 437. 27 | 26. 62519 | 458. 63 | 52. 971 | 457. 83 |
| 437. 44 | 26. 59119 | 458. 8  | 52. 956 | 458     |
| 437. 61 | 26. 56059 | 458. 97 | 52. 938 | 458. 17 |
| 437. 78 | 26. 52489 | 459. 15 | 52. 916 | 458. 34 |
| 437. 96 | 26. 48749 | 459. 32 | 52. 896 | 458. 51 |
| 438. 13 | 26. 44839 | 459. 49 | 52. 878 | 458. 68 |
| 438. 3  | 26. 41269 | 459. 66 | 52. 858 | 458. 85 |
| 438. 47 | 26. 38209 | 459. 83 | 52. 836 | 459. 02 |
| 438. 64 | 26. 35149 | 460     | 52. 811 | 459. 19 |
| 438. 81 | 26. 32429 | 460. 17 | 52. 793 | 459. 36 |
| 438. 98 | 26. 28519 | 460. 34 | 52. 773 | 459. 54 |
| 439. 15 | 26. 24779 | 460. 51 | 52. 746 | 459. 71 |
| 439. 32 | 26. 20699 | 460. 68 | 52. 716 | 459. 88 |
| 439. 49 | 26. 16959 | 460. 85 | 52. 696 | 460. 05 |
| 439. 66 | 26. 15599 | 461. 02 | 52. 681 | 460. 22 |
| 439. 83 | 26. 11859 | 461. 19 | 52. 664 | 460. 39 |
| 440     | 26. 07949 | 461. 36 | 52. 646 | 460. 56 |
| 440. 17 | 26. 03869 | 461. 53 | 52. 619 | 460. 73 |
| 440. 34 | 25. 99959 | 461. 7  | 52. 599 | 460. 9  |
| 440. 51 | 25. 96559 | 461. 87 | 52. 576 | 461. 07 |
| 440. 68 | 25. 93499 | 462. 04 | 52. 559 | 461. 24 |
| 440. 85 | 25. 90269 | 462. 21 | 52. 534 | 461. 41 |
| 441. 02 | 25. 86359 | 462. 38 | 52. 521 | 461. 58 |
| 441. 19 | 25. 82279 | 462. 55 | 52. 491 | 461. 75 |
| 441. 36 | 25. 78709 | 462. 73 | 52. 479 | 461. 92 |
| 441. 53 | 25. 75139 | 462. 9  | 52. 456 | 462. 1  |
| 441. 7  | 25. 71399 | 463. 07 | 52. 441 | 462. 27 |
| 441. 87 | 25. 68509 | 463. 24 | 52. 419 | 462. 44 |
| 442. 04 | 25. 64599 | 463. 41 | 52. 409 | 462. 61 |
| 442. 21 | 25. 6137  | 463. 58 | 52. 387 | 462. 78 |
| 442. 38 | 25. 5644  | 463. 75 | 52. 367 | 462. 95 |
| 442. 56 | 25. 5321  | 463. 92 | 52. 342 | 463. 12 |
| 442. 73 | 25. 5015  | 464. 09 | 52. 327 | 463. 29 |
| 442. 9  | 25. 4709  | 464. 26 | 52. 307 | 463. 46 |
| 443. 07 | 25. 4369  | 464. 43 | 52. 289 | 463. 63 |
| 443. 24 | 25. 3944  | 464. 6  | 52. 269 | 463. 8  |
| 443. 41 | 25. 3587  | 464. 77 | 52. 242 | 463. 97 |
| 443. 58 | 25. 3247  | 464. 94 | 52. 222 | 464. 14 |
| 443. 75 | 25. 289   | 465. 11 | 52. 209 | 464. 31 |
| 443. 92 | 25. 255   | 465. 28 | 52. 194 | 464. 48 |
| 444. 09 | 25. 2227  | 465. 45 | 52. 169 | 464. 65 |
| 444. 26 | 25. 1938  | 465. 62 | 52. 154 | 464. 82 |
| 444. 43 | 25. 1479  | 465. 79 | 52. 132 | 464. 99 |
| 444. 6  | 25. 1054  | 465. 96 | 52. 119 | 465. 16 |
| 444. 77 | 25. 0884  | 466. 13 | 52. 099 | 465. 33 |
| 444. 94 | 25. 0629  | 466. 31 | 52. 082 | 465. 5  |
| 445. 11 | 25. 0272  | 466. 48 | 52. 06  | 465. 67 |
| 445. 28 | 24. 9796  | 466. 65 | 52. 037 | 465. 85 |
| 445. 45 | 24. 9473  | 466. 82 | 52. 012 | 466. 02 |

|        |          |        |        |        |
|--------|----------|--------|--------|--------|
| 445.62 | 24.9116  | 466.99 | 51.99  | 466.19 |
| 445.79 | 24.8844  | 467.16 | 51.967 | 466.36 |
| 445.96 | 24.864   | 467.33 | 51.95  | 466.53 |
| 446.13 | 24.8266  | 467.5  | 51.932 | 466.7  |
| 446.3  | 24.7892  | 467.67 | 51.91  | 466.87 |
| 446.47 | 24.7501  | 467.84 | 51.902 | 467.04 |
| 446.64 | 24.711   | 468.01 | 51.88  | 467.21 |
| 446.81 | 24.6855  | 468.18 | 51.86  | 467.38 |
| 446.98 | 24.6549  | 468.35 | 51.827 | 467.55 |
| 447.15 | 24.6175  | 468.52 | 51.812 | 467.72 |
| 447.32 | 24.5835  | 468.69 | 51.795 | 467.89 |
| 447.49 | 24.5461  | 468.86 | 51.78  | 468.06 |
| 447.66 | 24.5121  | 469.03 | 51.762 | 468.23 |
| 447.83 | 24.4815  | 469.2  | 51.75  | 468.4  |
| 448    | 24.4526  | 469.37 | 51.73  | 468.57 |
| 448.17 | 24.422   | 469.54 | 51.71  | 468.74 |
| 448.34 | 24.388   | 469.71 | 51.683 | 468.91 |
| 448.51 | 24.35231 | 469.88 | 51.66  | 469.08 |
| 448.68 | 24.31321 | 470.05 | 51.648 | 469.26 |
| 448.85 | 24.29111 | 470.22 | 51.625 | 469.43 |
| 449.02 | 24.25031 | 470.39 | 51.603 | 469.6  |
| 449.19 | 24.23331 | 470.56 | 51.588 | 469.77 |
| 449.36 | 24.19251 | 470.73 | 51.568 | 469.94 |
| 449.53 | 24.17381 | 470.91 | 51.548 | 470.11 |
| 449.7  | 24.13301 | 471.08 | 51.528 | 470.28 |
| 449.87 | 24.09391 | 471.25 | 51.513 | 470.45 |
| 450.04 | 24.05991 | 471.42 | 51.498 | 470.62 |
| 450.21 | 24.03611 | 471.59 | 51.475 | 470.79 |
| 450.38 | 23.99701 | 471.76 | 51.45  | 470.96 |
| 450.55 | 23.97151 | 471.93 | 51.43  | 471.13 |
| 450.72 | 23.94091 | 472.1  | 51.418 | 471.3  |
| 450.89 | 23.89841 | 472.27 | 51.398 | 471.47 |
| 451.06 | 23.86781 | 472.44 | 51.378 | 471.64 |
| 451.23 | 23.83381 | 472.61 | 51.358 | 471.81 |
| 451.4  | 23.79981 | 472.78 | 51.343 | 471.98 |
| 451.57 | 23.77261 | 472.95 | 51.313 | 472.15 |
| 451.74 | 23.73521 | 473.12 | 51.296 | 472.32 |
| 451.91 | 23.70971 | 473.29 | 51.278 | 472.49 |
| 452.08 | 23.66381 | 473.46 | 51.263 | 472.66 |
| 452.25 | 23.63151 | 473.63 | 51.246 | 472.83 |
| 452.42 | 23.59581 | 473.8  | 51.226 | 473    |
| 452.59 | 23.57541 | 473.97 | 51.206 | 473.17 |
| 452.76 | 23.52951 | 474.14 | 51.193 | 473.34 |
| 452.93 | 23.48871 | 474.31 | 51.176 | 473.51 |
| 453.1  | 23.47171 | 474.48 | 51.151 | 473.68 |
| 453.27 | 23.42241 | 474.65 | 51.136 | 473.85 |
| 453.44 | 23.39011 | 474.82 | 51.116 | 474.02 |
| 453.61 | 23.37141 | 474.99 | 51.091 | 474.19 |
| 453.78 | 23.33401 | 475.16 | 51.073 | 474.36 |
| 453.96 | 23.30001 | 475.33 | 51.056 | 474.54 |
| 454.13 | 23.26261 | 475.5  | 51.036 | 474.71 |
| 454.3  | 23.23541 | 475.67 | 51.021 | 474.88 |
| 454.47 | 23.19801 | 475.84 | 51.001 | 475.05 |
| 454.64 | 23.16741 | 476.01 | 50.986 | 475.22 |



|         |           |         |         |         |
|---------|-----------|---------|---------|---------|
| 454. 81 | 23. 14361 | 476. 18 | 50. 971 | 475. 39 |
| 454. 98 | 23. 10622 | 476. 35 | 50. 954 | 475. 56 |
| 455. 15 | 23. 07222 | 476. 52 | 50. 941 | 475. 73 |
| 455. 32 | 23. 04162 | 476. 69 | 50. 914 | 475. 9  |
| 455. 49 | 23. 00762 | 476. 87 | 50. 889 | 476. 07 |
| 455. 66 | 22. 97702 | 477. 04 | 50. 876 | 476. 24 |
| 455. 83 | 22. 94302 | 477. 21 | 50. 861 | 476. 41 |
| 456     | 22. 91752 | 477. 38 | 50. 841 | 476. 58 |
| 456. 17 | 22. 88182 | 477. 55 | 50. 826 | 476. 75 |
| 456. 34 | 22. 84952 | 477. 72 | 50. 811 | 476. 92 |
| 456. 51 | 22. 82062 | 477. 89 | 50. 784 | 477. 09 |
| 456. 68 | 22. 78152 | 478. 06 | 50. 759 | 477. 26 |
| 456. 85 | 22. 75602 | 478. 23 | 50. 731 | 477. 43 |
| 457. 02 | 22. 72202 | 478. 4  | 50. 716 | 477. 6  |
| 457. 19 | 22. 68632 | 478. 57 | 50. 691 | 477. 77 |
| 457. 37 | 22. 65402 | 478. 74 | 50. 674 | 477. 94 |
| 457. 54 | 22. 62682 | 478. 91 | 50. 657 | 478. 11 |
| 457. 71 | 22. 59962 | 479. 08 | 50. 652 | 478. 28 |
| 457. 88 | 22. 57072 | 479. 25 | 50. 634 | 478. 45 |
| 458. 05 | 22. 54012 | 479. 42 | 50. 612 | 478. 62 |
| 458. 22 | 22. 50952 | 479. 59 | 50. 594 | 478. 79 |
| 458. 39 | 22. 47042 | 479. 76 | 50. 582 | 478. 96 |
| 458. 56 | 22. 44832 | 479. 93 | 50. 567 | 479. 13 |
| 458. 73 | 22. 40412 | 480. 1  | 50. 549 | 479. 3  |
| 458. 9  | 22. 37692 | 480. 27 | 50. 524 | 479. 47 |
| 459. 07 | 22. 33952 | 480. 44 | 50. 502 | 479. 64 |
| 459. 24 | 22. 30042 | 480. 61 | 50. 492 | 479. 81 |
| 459. 41 | 22. 26982 | 480. 78 | 50. 467 | 479. 98 |
| 459. 58 | 22. 23412 | 480. 95 | 50. 449 | 480. 15 |
| 459. 75 | 22. 21202 | 481. 12 | 50. 434 | 480. 32 |
| 459. 92 | 22. 18142 | 481. 29 | 50. 422 | 480. 49 |
| 460. 09 | 22. 15422 | 481. 46 | 50. 402 | 480. 66 |
| 460. 26 | 22. 11512 | 481. 63 | 50. 387 | 480. 83 |
| 460. 43 | 22. 08112 | 481. 8  | 50. 367 | 481     |
| 460. 6  | 22. 04882 | 481. 97 | 50. 359 | 481. 17 |
| 460. 77 | 22. 02672 | 482. 14 | 50. 347 | 481. 34 |
| 460. 95 | 21. 99442 | 482. 31 | 50. 325 | 481. 51 |
| 461. 12 | 21. 96382 | 482. 48 | 50. 307 | 481. 68 |
| 461. 29 | 21. 92982 | 482. 65 | 50. 287 | 481. 85 |
| 461. 46 | 21. 90602 | 482. 83 | 50. 27  | 482. 02 |
| 461. 63 | 21. 86353 | 483     | 50. 255 | 482. 19 |
| 461. 8  | 21. 84483 | 483. 17 | 50. 237 | 482. 36 |
| 461. 97 | 21. 81083 | 483. 34 | 50. 215 | 482. 53 |
| 462. 14 | 21. 78363 | 483. 51 | 50. 197 | 482. 7  |
| 462. 31 | 21. 75473 | 483. 68 | 50. 187 | 482. 87 |
| 462. 48 | 21. 72583 | 483. 85 | 50. 172 | 483. 04 |
| 462. 65 | 21. 68333 | 484. 02 | 50. 157 | 483. 21 |
| 462. 82 | 21. 65783 | 484. 19 | 50. 137 | 483. 38 |
| 462. 99 | 21. 63063 | 484. 36 | 50. 122 | 483. 55 |
| 463. 16 | 21. 60343 | 484. 53 | 50. 1   | 483. 72 |
| 463. 33 | 21. 57453 | 484. 7  | 50. 095 | 483. 89 |
| 463. 5  | 21. 53713 | 484. 87 | 50. 075 | 484. 06 |
| 463. 67 | 21. 52013 | 485. 04 | 50. 065 | 484. 23 |
| 463. 84 | 21. 48103 | 485. 21 | 50. 047 | 484. 4  |

|         |           |         |         |         |
|---------|-----------|---------|---------|---------|
| 464. 01 | 21. 46573 | 485. 38 | 50. 025 | 484. 57 |
| 464. 18 | 21. 43343 | 485. 55 | 49. 998 | 484. 74 |
| 464. 35 | 21. 40623 | 485. 72 | 49. 995 | 484. 91 |
| 464. 52 | 21. 37903 | 485. 89 | 49. 98  | 485. 08 |
| 464. 69 | 21. 34333 | 486. 06 | 49. 965 | 485. 25 |
| 464. 87 | 21. 32123 | 486. 23 | 49. 945 | 485. 42 |
| 465. 04 | 21. 29233 | 486. 4  | 49. 925 | 485. 59 |
| 465. 21 | 21. 26683 | 486. 57 | 49. 91  | 485. 76 |
| 465. 38 | 21. 23453 | 486. 74 | 49. 898 | 485. 93 |
| 465. 55 | 21. 21073 | 486. 91 | 49. 88  | 486. 1  |
| 465. 72 | 21. 17503 | 487. 08 | 49. 865 | 486. 27 |
| 465. 89 | 21. 14613 | 487. 25 | 49. 858 | 486. 44 |
| 466. 06 | 21. 13593 | 487. 42 | 49. 838 | 486. 61 |
| 466. 23 | 21. 10023 | 487. 59 | 49. 823 | 486. 78 |
| 466. 4  | 21. 06283 | 487. 76 | 49. 805 | 486. 95 |
| 466. 57 | 21. 04923 | 487. 93 | 49. 79  | 487. 12 |
| 466. 74 | 21. 01693 | 488. 1  | 49. 775 | 487. 29 |
| 466. 91 | 20. 98803 | 488. 27 | 49. 765 | 487. 46 |
| 467. 08 | 20. 95063 | 488. 44 | 49. 75  | 487. 63 |
| 467. 26 | 20. 93533 | 488. 61 | 49. 735 | 487. 8  |
| 467. 43 | 20. 90643 | 488. 78 | 49. 718 | 487. 97 |
| 467. 6  | 20. 86733 | 488. 95 | 49. 71  | 488. 14 |
| 467. 77 | 20. 83163 | 489. 12 | 49. 7   | 488. 31 |
| 467. 94 | 20. 80273 | 489. 29 | 49. 68  | 488. 48 |
| 468. 11 | 20. 76873 | 489. 46 | 49. 66  | 488. 65 |
| 468. 28 | 20. 74323 | 489. 63 | 49. 643 | 488. 82 |
| 468. 45 | 20. 71263 | 489. 8  | 49. 631 | 488. 99 |
| 468. 62 | 20. 68373 | 489. 97 | 49. 613 | 489. 16 |
| 468. 79 | 20. 64973 | 490. 14 | 49. 596 | 489. 33 |
| 468. 96 | 20. 61744 | 490. 31 | 49. 583 | 489. 5  |
| 469. 13 | 20. 59534 | 490. 48 | 49. 568 | 489. 67 |
| 469. 3  | 20. 56474 | 490. 65 | 49. 553 | 489. 84 |
| 469. 47 | 20. 54944 | 490. 82 | 49. 538 | 490. 01 |
| 469. 64 | 20. 50694 | 490. 99 | 49. 531 | 490. 18 |
| 469. 82 | 20. 47464 | 491. 16 | 49. 511 | 490. 35 |
| 469. 99 | 20. 44404 | 491. 33 | 49. 496 | 490. 52 |
| 470. 16 | 20. 41684 | 491. 5  | 49. 486 | 490. 69 |
| 470. 33 | 20. 38794 | 491. 67 | 49. 476 | 490. 86 |
| 470. 5  | 20. 36414 | 491. 84 | 49. 458 | 491. 03 |
| 470. 67 | 20. 33524 | 492. 01 | 49. 441 | 491. 2  |
| 470. 84 | 20. 30464 | 492. 18 | 49. 421 | 491. 37 |
| 471. 01 | 20. 27574 | 492. 35 | 49. 411 | 491. 54 |
| 471. 18 | 20. 24174 | 492. 52 | 49. 401 | 491. 71 |
| 471. 35 | 20. 20604 | 492. 69 | 49. 388 | 491. 88 |
| 471. 52 | 20. 18564 | 492. 86 | 49. 371 | 492. 05 |
| 471. 69 | 20. 15334 | 493. 03 | 49. 356 | 492. 22 |
| 471. 86 | 20. 12274 | 493. 2  | 49. 343 | 492. 39 |
| 472. 03 | 20. 09554 | 493. 37 | 49. 326 | 492. 56 |
| 472. 2  | 20. 06834 | 493. 54 | 49. 309 | 492. 73 |
| 472. 38 | 20. 05134 | 493. 71 | 49. 301 | 492. 9  |
| 472. 55 | 20. 01054 | 493. 88 | 49. 279 | 493. 07 |
| 472. 72 | 19. 99014 | 494. 05 | 49. 259 | 493. 24 |
| 472. 89 | 19. 95614 | 494. 22 | 49. 254 | 493. 41 |
| 473. 06 | 19. 92894 | 494. 39 | 49. 241 | 493. 58 |

|         |           |         |         |         |
|---------|-----------|---------|---------|---------|
| 473. 23 | 19. 90174 | 494. 56 | 49. 229 | 493. 75 |
| 473. 4  | 19. 86944 | 494. 73 | 49. 214 | 493. 92 |
| 473. 57 | 19. 83714 | 494. 9  | 49. 199 | 494. 09 |
| 473. 74 | 19. 82014 | 495. 07 | 49. 181 | 494. 26 |
| 473. 91 | 19. 79804 | 495. 24 | 49. 169 | 494. 42 |
| 474. 08 | 19. 76914 | 495. 41 | 49. 164 | 494. 59 |
| 474. 25 | 19. 74194 | 495. 58 | 49. 154 | 494. 76 |
| 474. 43 | 19. 70964 | 495. 75 | 49. 146 | 494. 93 |
| 474. 6  | 19. 69094 | 495. 92 | 49. 129 | 495. 1  |
| 474. 77 | 19. 65014 | 496. 09 | 49. 114 | 495. 27 |
| 474. 94 | 19. 63314 | 496. 26 | 49. 094 | 495. 44 |
| 475. 11 | 19. 60764 | 496. 43 | 49. 076 | 495. 61 |
| 475. 28 | 19. 57704 | 496. 6  | 49. 064 | 495. 78 |
| 475. 45 | 19. 54984 | 496. 77 | 49. 056 | 495. 95 |
| 475. 62 | 19. 51924 | 496. 94 | 49. 046 | 496. 12 |
| 475. 79 | 19. 50564 | 497. 11 | 49. 036 | 496. 29 |
| 475. 96 | 19. 47844 | 497. 28 | 49. 024 | 496. 46 |
| 476. 13 | 19. 45294 | 497. 45 | 49. 004 | 496. 63 |
| 476. 3  | 19. 41894 | 497. 62 | 48. 991 | 496. 8  |
| 476. 48 | 19. 38834 | 497. 79 | 48. 984 | 496. 97 |
| 476. 65 | 19. 36455 | 497. 96 | 48. 971 | 497. 14 |
| 476. 82 | 19. 33905 | 498. 13 | 48. 959 | 497. 31 |
| 476. 99 | 19. 32035 | 498. 3  | 48. 944 | 497. 48 |
| 477. 16 | 19. 29825 | 498. 47 | 48. 937 | 497. 65 |
| 477. 33 | 19. 27105 | 498. 64 | 48. 927 | 497. 82 |
| 477. 5  | 19. 23535 | 498. 8  | 48. 914 | 497. 99 |
| 477. 67 | 19. 21495 | 498. 97 | 48. 904 | 498. 16 |
| 477. 84 | 19. 19455 | 499. 14 | 48. 894 | 498. 33 |
| 478. 01 | 19. 17245 | 499. 31 | 48. 882 | 498. 5  |
| 478. 18 | 19. 15205 | 499. 48 | 48. 867 | 498. 67 |
| 478. 36 | 19. 12825 | 499. 65 | 48. 854 | 498. 83 |
| 478. 53 | 19. 10615 | 499. 82 | 48. 842 | 499     |
| 478. 7  | 19. 07555 | 499. 99 | 48. 832 | 499. 17 |
| 478. 87 | 19. 05345 | 500. 16 | 48. 819 | 499. 34 |
| 479. 04 | 19. 02625 | 500. 33 | 48. 812 | 499. 51 |
| 479. 21 | 19. 00245 | 500. 5  | 48. 792 | 499. 68 |
| 479. 38 | 18. 97355 | 500. 67 | 48. 782 | 499. 85 |
| 479. 55 | 18. 94805 | 500. 84 | 48. 769 | 500. 02 |
| 479. 72 | 18. 92935 | 501. 01 | 48. 767 | 500. 19 |
| 479. 89 | 18. 90385 | 501. 18 | 48. 754 | 500. 36 |
| 480. 06 | 18. 88515 | 501. 35 | 48. 739 | 500. 53 |
| 480. 23 | 18. 86645 | 501. 52 | 48. 729 | 500. 7  |
| 480. 41 | 18. 83755 | 501. 69 | 48. 719 | 500. 87 |
| 480. 58 | 18. 81545 | 501. 86 | 48. 709 | 501. 04 |
| 480. 75 | 18. 78995 | 502. 03 | 48. 699 | 501. 21 |
| 480. 92 | 18. 76105 | 502. 2  | 48. 689 | 501. 38 |
| 481. 09 | 18. 73895 | 502. 37 | 48. 677 | 501. 55 |
| 481. 26 | 18. 72195 | 502. 54 | 48. 667 | 501. 72 |
| 481. 43 | 18. 69305 | 502. 71 | 48. 649 | 501. 89 |
| 481. 6  | 18. 67095 | 502. 88 | 48. 637 | 502. 06 |
| 481. 77 | 18. 64375 | 503. 05 | 48. 627 | 502. 23 |
| 481. 94 | 18. 62335 | 503. 22 | 48. 62  | 502. 4  |
| 482. 11 | 18. 60465 | 503. 39 | 48. 612 | 502. 57 |
| 482. 28 | 18. 58085 | 503. 55 | 48. 605 | 502. 73 |

|        |          |        |        |        |
|--------|----------|--------|--------|--------|
| 482.45 | 18.56045 | 503.72 | 48.59  | 502.9  |
| 482.63 | 18.53495 | 503.89 | 48.577 | 503.07 |
| 482.8  | 18.51115 | 504.06 | 48.567 | 503.24 |
| 482.97 | 18.49245 | 504.23 | 48.557 | 503.41 |
| 483.14 | 18.46865 | 504.4  | 48.547 | 503.58 |
| 483.31 | 18.44825 | 504.57 | 48.54  | 503.75 |
| 483.48 | 18.43465 | 504.74 | 48.53  | 503.92 |
| 483.65 | 18.40915 | 504.91 | 48.517 | 504.09 |
| 483.82 | 18.38875 | 505.08 | 48.507 | 504.26 |
| 483.99 | 18.36495 | 505.25 | 48.495 | 504.43 |
| 484.16 | 18.34285 | 505.42 | 48.49  | 504.6  |
| 484.33 | 18.31735 | 505.59 | 48.477 | 504.77 |
| 484.5  | 18.29185 | 505.76 | 48.472 | 504.94 |
| 484.67 | 18.26805 | 505.93 | 48.462 | 505.11 |
| 484.84 | 18.24935 | 506.1  | 48.457 | 505.28 |
| 485.02 | 18.22725 | 506.27 | 48.445 | 505.45 |
| 485.19 | 18.21365 | 506.44 | 48.432 | 505.62 |
| 485.36 | 18.18815 | 506.61 | 48.422 | 505.79 |
| 485.53 | 18.17455 | 506.78 | 48.417 | 505.96 |
| 485.7  | 18.14735 | 506.95 | 48.407 | 506.12 |
| 485.87 | 18.12865 | 507.12 | 48.397 | 506.29 |
| 486.04 | 18.10146 | 507.29 | 48.382 | 506.46 |
| 486.21 | 18.08786 | 507.46 | 48.37  | 506.63 |
| 486.38 | 18.06236 | 507.62 | 48.36  | 506.8  |
| 486.55 | 18.04876 | 507.79 | 48.35  | 506.97 |
| 486.72 | 18.02666 | 507.96 | 48.34  | 507.14 |
| 486.89 | 18.01306 | 508.13 | 48.332 | 507.31 |
| 487.06 | 17.99436 | 508.3  | 48.327 | 507.48 |
| 487.23 | 17.96886 | 508.47 | 48.317 | 507.65 |
| 487.4  | 17.94166 | 508.64 | 48.307 | 507.82 |
| 487.57 | 17.92636 | 508.81 | 48.3   | 507.99 |
| 487.74 | 17.90426 | 508.98 | 48.287 | 508.16 |
| 487.91 | 17.89406 | 509.15 | 48.28  | 508.33 |
| 488.09 | 17.87706 | 509.32 | 48.275 | 508.5  |
| 488.26 | 17.85496 | 509.49 | 48.265 | 508.67 |
| 488.43 | 17.83286 | 509.66 | 48.26  | 508.84 |
| 488.6  | 17.81246 | 509.83 | 48.255 | 509    |
| 488.77 | 17.79206 | 510    | 48.245 | 509.17 |
| 488.94 | 17.78016 | 510.17 | 48.235 | 509.34 |
| 489.11 | 17.76316 | 510.34 | 48.225 | 509.51 |
| 489.28 | 17.74276 | 510.51 | 48.218 | 509.68 |
| 489.45 | 17.72236 | 510.68 | 48.21  | 509.85 |
| 489.62 | 17.69856 | 510.85 | 48.2   | 510.02 |
| 489.79 | 17.68326 | 511.02 | 48.19  | 510.19 |
| 489.96 | 17.66456 | 511.19 | 48.18  | 510.36 |
| 490.13 | 17.64926 | 511.36 | 48.175 | 510.53 |
| 490.3  | 17.62886 | 511.52 | 48.165 | 510.7  |
| 490.47 | 17.60506 | 511.69 | 48.163 | 510.87 |
| 490.64 | 17.58466 | 511.86 | 48.148 | 511.04 |
| 490.81 | 17.57106 | 512.03 | 48.135 | 511.21 |
| 490.98 | 17.55746 | 512.2  | 48.13  | 511.38 |
| 491.15 | 17.54556 | 512.37 | 48.12  | 511.55 |
| 491.32 | 17.52176 | 512.54 | 48.113 | 511.72 |
| 491.49 | 17.50476 | 512.71 | 48.11  | 511.88 |

|        |          |        |        |        |
|--------|----------|--------|--------|--------|
| 491.66 | 17.48776 | 512.88 | 48.103 | 512.05 |
| 491.83 | 17.46736 | 513.05 | 48.098 | 512.22 |
| 492.01 | 17.45376 | 513.22 | 48.093 | 512.39 |
| 492.18 | 17.44016 | 513.39 | 48.085 | 512.56 |
| 492.35 | 17.42316 | 513.56 | 48.075 | 512.73 |
| 492.52 | 17.40616 | 513.73 | 48.063 | 512.9  |
| 492.69 | 17.38746 | 513.9  | 48.053 | 513.07 |
| 492.86 | 17.37216 | 514.07 | 48.045 | 513.24 |
| 493.03 | 17.35176 | 514.24 | 48.04  | 513.41 |
| 493.2  | 17.34156 | 514.41 | 48.035 | 513.58 |
| 493.37 | 17.32286 | 514.58 | 48.028 | 513.75 |
| 493.54 | 17.30416 | 514.75 | 48.015 | 513.92 |
| 493.71 | 17.28376 | 514.92 | 48.008 | 514.09 |
| 493.88 | 17.27186 | 515.09 | 48     | 514.26 |
| 494.05 | 17.26166 | 515.26 | 47.993 | 514.43 |
| 494.22 | 17.24296 | 515.43 | 47.983 | 514.6  |
| 494.39 | 17.22596 | 515.6  | 47.978 | 514.77 |
| 494.56 | 17.20726 | 515.77 | 47.973 | 514.93 |
| 494.73 | 17.19536 | 515.94 | 47.965 | 515.1  |
| 494.9  | 17.18006 | 516.1  | 47.958 | 515.27 |
| 495.07 | 17.16476 | 516.27 | 47.953 | 515.44 |
| 495.24 | 17.15456 | 516.44 | 47.948 | 515.61 |
| 495.41 | 17.13926 | 516.61 | 47.94  | 515.78 |
| 495.58 | 17.11886 | 516.78 | 47.938 | 515.95 |
| 495.75 | 17.10526 | 516.95 | 47.931 | 516.12 |
| 495.92 | 17.09166 | 517.12 | 47.921 | 516.29 |
| 496.09 | 17.07976 | 517.29 | 47.913 | 516.46 |
| 496.26 | 17.06786 | 517.46 | 47.903 | 516.63 |
| 496.43 | 17.04916 | 517.63 | 47.898 | 516.8  |
| 496.6  | 17.03726 | 517.8  | 47.891 | 516.97 |
| 496.77 | 17.01516 | 517.97 | 47.886 | 517.14 |
| 496.94 | 17.00156 | 518.14 | 47.876 | 517.31 |
| 497.11 | 16.98796 | 518.31 | 47.873 | 517.48 |
| 497.28 | 16.98116 | 518.48 | 47.863 | 517.65 |
| 497.45 | 16.96756 | 518.65 | 47.858 | 517.81 |
| 497.62 | 16.95056 | 518.82 | 47.851 | 517.98 |
| 497.79 | 16.93526 | 518.99 | 47.848 | 518.15 |
| 497.96 | 16.91996 | 519.16 | 47.846 | 518.32 |
| 498.13 | 16.90976 | 519.33 | 47.841 | 518.49 |
| 498.3  | 16.89276 | 519.5  | 47.831 | 518.66 |
| 498.48 | 16.88086 | 519.67 | 47.826 | 518.83 |
| 498.65 | 16.86897 | 519.83 | 47.818 | 519    |
| 498.82 | 16.85537 | 520    | 47.811 | 519.17 |
| 498.99 | 16.84177 | 520.17 | 47.803 | 519.34 |
| 499.16 | 16.82987 | 520.34 | 47.801 | 519.51 |
| 499.33 | 16.81797 | 520.51 | 47.793 | 519.68 |
| 499.5  | 16.79587 | 520.68 | 47.791 | 519.85 |
| 499.67 | 16.78227 | 520.85 | 47.788 | 520.02 |
| 499.84 | 16.77207 | 521.02 | 47.778 | 520.19 |
| 500.01 | 16.76867 | 521.19 | 47.768 | 520.36 |
| 500.18 | 16.75337 | 521.36 | 47.761 | 520.53 |
| 500.35 | 16.73977 | 521.53 | 47.756 | 520.7  |
| 500.52 | 16.72787 | 521.7  | 47.748 | 520.86 |
| 500.69 | 16.71597 | 521.87 | 47.741 | 521.03 |

|        |          |        |        |        |
|--------|----------|--------|--------|--------|
| 500.86 | 16.70577 | 522.04 | 47.738 | 521.2  |
| 501.03 | 16.68707 | 522.21 | 47.736 | 521.37 |
| 501.2  | 16.67517 | 522.38 | 47.726 | 521.54 |
| 501.37 | 16.65987 | 522.55 | 47.721 | 521.71 |
| 501.54 | 16.64457 | 522.72 | 47.716 | 521.88 |
| 501.71 | 16.66497 | 522.89 | 47.706 | 522.05 |
| 501.88 | 16.67347 | 523.06 | 47.698 | 522.22 |
| 502.05 | 16.61737 | 523.23 | 47.693 | 522.39 |
| 502.22 | 16.60207 | 523.4  | 47.688 | 522.56 |
| 502.39 | 16.59187 | 523.57 | 47.683 | 522.73 |
| 502.56 | 16.57827 | 523.73 | 47.681 | 522.9  |
| 502.73 | 16.56977 | 523.9  | 47.673 | 523.07 |
| 502.9  | 16.55787 | 524.07 | 47.668 | 523.24 |
| 503.07 | 16.53747 | 524.24 | 47.663 | 523.41 |
| 503.24 | 16.52897 | 524.41 | 47.658 | 523.58 |
| 503.41 | 16.52047 | 524.58 | 47.653 | 523.75 |
| 503.58 | 16.51027 | 524.75 | 47.648 | 523.92 |
| 503.75 | 16.50007 | 524.92 | 47.646 | 524.09 |
| 503.92 | 16.48817 | 525.09 | 47.638 | 524.25 |
| 504.09 | 16.47797 | 525.26 | 47.628 | 524.42 |
| 504.26 | 16.46947 | 525.43 | 47.621 | 524.59 |
| 504.43 | 16.45757 | 525.6  | 47.613 | 524.76 |
| 504.6  | 16.44397 | 525.77 | 47.608 | 524.93 |
| 504.77 | 16.43207 | 525.94 | 47.603 | 525.1  |
| 504.94 | 16.42357 | 526.11 | 47.598 | 525.27 |
| 505.11 | 16.41507 | 526.28 | 47.596 | 525.44 |
| 505.28 | 16.40827 | 526.45 | 47.593 | 525.61 |
| 505.45 | 16.39467 | 526.62 | 47.588 | 525.78 |
| 505.62 | 16.38277 | 526.78 | 47.586 | 525.95 |
| 505.79 | 16.37087 | 526.95 | 47.584 | 526.12 |
| 505.96 | 16.35897 | 527.12 | 47.581 | 526.29 |
| 506.13 | 16.34877 | 527.29 | 47.574 | 526.46 |
| 506.3  | 16.34197 | 527.46 | 47.569 | 526.62 |
| 506.47 | 16.33007 | 527.63 | 47.559 | 526.79 |
| 506.64 | 16.31987 | 527.8  | 47.554 | 526.96 |
| 506.82 | 16.31307 | 527.97 | 47.551 | 527.13 |
| 506.99 | 16.30287 | 528.14 | 47.546 | 527.3  |
| 507.16 | 16.29097 | 528.31 | 47.541 | 527.47 |
| 507.33 | 16.28417 | 528.48 | 47.536 | 527.64 |
| 507.5  | 16.26717 | 528.65 | 47.534 | 527.81 |
| 507.67 | 16.26037 | 528.82 | 47.529 | 527.98 |
| 507.84 | 16.25017 | 528.99 | 47.524 | 528.15 |
| 508.01 | 16.23997 | 529.16 | 47.516 | 528.32 |
| 508.18 | 16.23147 | 529.33 | 47.511 | 528.48 |
| 508.35 | 16.22127 | 529.49 | 47.506 | 528.65 |
| 508.52 | 16.21617 | 529.66 | 47.501 | 528.82 |
| 508.69 | 16.20087 | 529.83 | 47.499 | 528.99 |
| 508.86 | 16.19237 | 530    | 47.494 | 529.16 |
| 509.03 | 16.18897 | 530.17 | 47.489 | 529.33 |
| 509.2  | 16.18557 | 530.34 | 47.484 | 529.5  |
| 509.37 | 16.17537 | 530.51 | 47.479 | 529.67 |
| 509.54 | 16.16177 | 530.68 | 47.474 | 529.84 |
| 509.71 | 16.15157 | 530.85 | 47.471 | 530.01 |
| 509.88 | 16.14307 | 531.02 | 47.466 | 530.17 |

|        |          |        |        |        |
|--------|----------|--------|--------|--------|
| 510.05 | 16.13117 | 531.19 | 47.464 | 530.34 |
| 510.22 | 16.12097 | 531.36 | 47.459 | 530.51 |
| 510.39 | 16.11247 | 531.52 | 47.456 | 530.68 |
| 510.56 | 16.10737 | 531.69 | 47.451 | 530.85 |
| 510.73 | 16.09717 | 531.86 | 47.449 | 531.02 |
| 510.9  | 16.08697 | 532.03 | 47.444 | 531.19 |
| 511.07 | 16.08017 | 532.2  | 47.439 | 531.36 |
| 511.24 | 16.06997 | 532.37 | 47.434 | 531.53 |
| 511.42 | 16.06147 | 532.54 | 47.431 | 531.7  |
| 511.59 | 16.05637 | 532.71 | 47.426 | 531.86 |
| 511.76 | 16.04957 | 532.88 | 47.421 | 532.03 |
| 511.93 | 16.03937 | 533.05 | 47.416 | 532.2  |
| 512.1  | 16.03087 | 533.22 | 47.409 | 532.37 |
| 512.27 | 16.02407 | 533.39 | 47.406 | 532.54 |
| 512.44 | 16.01727 | 533.55 | 47.401 | 532.71 |
| 512.61 | 16.00877 | 533.72 | 47.396 | 532.88 |
| 512.78 | 15.99857 | 533.89 | 47.391 | 533.05 |
| 512.95 | 15.99347 | 534.06 | 47.386 | 533.22 |
| 513.12 | 15.98497 | 534.23 | 47.381 | 533.39 |
| 513.29 | 15.97477 | 534.4  | 47.376 | 533.56 |
| 513.46 | 15.96797 | 534.57 | 47.376 | 533.73 |
| 513.63 | 15.95947 | 534.74 | 47.374 | 533.9  |
| 513.8  | 15.95437 | 534.91 | 47.371 | 534.06 |
| 513.97 | 15.94417 | 535.08 | 47.369 | 534.23 |
| 514.14 | 15.93397 | 535.25 | 47.364 | 534.4  |
| 514.31 | 15.92717 | 535.42 | 47.364 | 534.57 |
| 514.48 | 15.91867 | 535.58 | 47.359 | 534.74 |
| 514.65 | 15.91187 | 535.75 | 47.359 | 534.91 |
| 514.82 | 15.90167 | 535.92 | 47.354 | 535.08 |
| 514.99 | 15.89487 | 536.09 | 47.349 | 535.25 |
| 515.16 | 15.88637 | 536.26 | 47.344 | 535.42 |
| 515.33 | 15.88127 | 536.43 | 47.339 | 535.59 |
| 515.5  | 15.87617 | 536.6  | 47.334 | 535.75 |
| 515.68 | 15.86937 | 536.77 | 47.329 | 535.92 |
| 515.85 | 15.85917 | 536.94 | 47.324 | 536.09 |
| 516.02 | 15.85237 | 537.11 | 47.316 | 536.26 |
| 516.19 | 15.84387 | 537.28 | 47.314 | 536.43 |
| 516.36 | 15.83877 | 537.44 | 47.311 | 536.6  |
| 516.53 | 15.83197 | 537.61 | 47.304 | 536.77 |
| 516.7  | 15.82687 | 537.78 | 47.301 | 536.94 |
| 516.87 | 15.81837 | 537.95 | 47.296 | 537.11 |
| 517.04 | 15.80987 | 538.12 | 47.294 | 537.28 |
| 517.21 | 15.80477 | 538.29 | 47.291 | 537.45 |
| 517.38 | 15.79967 | 538.46 | 47.286 | 537.61 |
| 517.55 | 15.79457 | 538.63 | 47.284 | 537.78 |
| 517.72 | 15.78777 | 538.8  | 47.279 | 537.95 |
| 517.89 | 15.77927 | 538.97 | 47.276 | 538.12 |
| 518.06 | 15.77247 | 539.14 | 47.271 | 538.29 |
| 518.23 | 15.76737 | 539.31 | 47.269 | 538.46 |
| 518.4  | 15.76227 | 539.47 | 47.266 | 538.63 |
| 518.57 | 15.75717 | 539.64 | 47.261 | 538.8  |
| 518.74 | 15.74867 | 539.81 | 47.256 | 538.97 |
| 518.91 | 15.73847 | 539.98 | 47.251 | 539.14 |
| 519.08 | 15.73337 | 540.15 | 47.249 | 539.31 |

|        |          |        |        |        |
|--------|----------|--------|--------|--------|
| 519.25 | 15.72657 | 540.32 | 47.246 | 539.48 |
| 519.42 | 15.72147 | 540.49 | 47.241 | 539.64 |
| 519.59 | 15.71807 | 540.66 | 47.237 | 539.81 |
| 519.77 | 15.71127 | 540.83 | 47.234 | 539.98 |
| 519.94 | 15.70787 | 541    | 47.229 | 540.15 |
| 520.11 | 15.70107 | 541.17 | 47.227 | 540.32 |
| 520.28 | 15.69257 | 541.34 | 47.224 | 540.49 |
| 520.45 | 15.68577 | 541.5  | 47.219 | 540.66 |
| 520.62 | 15.68067 | 541.67 | 47.217 | 540.83 |
| 520.79 | 15.67387 | 541.84 | 47.214 | 541    |
| 520.96 | 15.67047 | 542.01 | 47.212 | 541.17 |
| 521.13 | 15.66367 | 542.18 | 47.209 | 541.34 |
| 521.3  | 15.66027 | 542.35 | 47.207 | 541.5  |
| 521.47 | 15.65347 | 542.52 | 47.204 | 541.67 |
| 521.64 | 15.64667 | 542.69 | 47.199 | 541.84 |
| 521.81 | 15.64157 | 542.86 | 47.199 | 542.01 |
| 521.98 | 15.63647 | 543.03 | 47.194 | 542.18 |
| 522.15 | 15.63137 | 543.2  | 47.192 | 542.35 |
| 522.32 | 15.62627 | 543.37 | 47.187 | 542.52 |
| 522.49 | 15.62288 | 543.54 | 47.184 | 542.69 |
| 522.66 | 15.61608 | 543.7  | 47.182 | 542.86 |
| 522.83 | 15.61098 | 543.87 | 47.177 | 543.03 |
| 523    | 15.60588 | 544.04 | 47.174 | 543.2  |
| 523.17 | 15.60248 | 544.21 | 47.172 | 543.36 |
| 523.34 | 15.59738 | 544.38 | 47.169 | 543.53 |
| 523.51 | 15.58888 | 544.55 | 47.167 | 543.7  |
| 523.68 | 15.58208 | 544.72 | 47.162 | 543.87 |
| 523.85 | 15.57698 | 544.89 | 47.159 | 544.04 |
| 524.02 | 15.57188 | 545.06 | 47.157 | 544.21 |
| 524.19 | 15.56848 | 545.23 | 47.152 | 544.38 |
| 524.36 | 15.56168 | 545.4  | 47.149 | 544.55 |
| 524.54 | 15.55828 | 545.57 | 47.147 | 544.72 |
| 524.71 | 15.55318 | 545.73 | 47.142 | 544.89 |
| 524.88 | 15.54638 | 545.9  | 47.134 | 545.05 |
| 525.05 | 15.54298 | 546.07 | 47.132 | 545.22 |
| 525.22 | 15.53958 | 546.24 | 47.127 | 545.39 |
| 525.39 | 15.53448 | 546.41 | 47.122 | 545.56 |
| 525.56 | 15.52768 | 546.58 | 47.119 | 545.73 |
| 525.73 | 15.52258 | 546.75 | 47.117 | 545.9  |
| 525.9  | 15.51578 | 546.92 | 47.114 | 546.07 |
| 526.07 | 15.51068 | 547.09 | 47.112 | 546.24 |
| 526.24 | 15.50558 | 547.26 | 47.107 | 546.41 |
| 526.41 | 15.50218 | 547.43 | 47.104 | 546.58 |
| 526.58 | 15.49708 | 547.6  | 47.102 | 546.75 |
| 526.75 | 15.49368 | 547.77 | 47.099 | 546.92 |
| 526.92 | 15.48858 | 547.93 | 47.094 | 547.09 |
| 527.09 | 15.48348 | 548.1  | 47.089 | 547.25 |
| 527.26 | 15.47838 | 548.27 | 47.087 | 547.42 |
| 527.43 | 15.47328 | 548.44 | 47.084 | 547.59 |
| 527.6  | 15.46988 | 548.61 | 47.079 | 547.76 |
| 527.77 | 15.46648 | 548.78 | 47.077 | 547.93 |
| 527.94 | 15.45968 | 548.95 | 47.074 | 548.1  |
| 528.11 | 15.45288 | 549.12 | 47.069 | 548.27 |
| 528.28 | 15.44948 | 549.29 | 47.067 | 548.44 |



|        |          |        |        |        |
|--------|----------|--------|--------|--------|
| 528.45 | 15.44608 | 549.46 | 47.067 | 548.61 |
| 528.62 | 15.44098 | 549.63 | 47.062 | 548.78 |
| 528.79 | 15.43588 | 549.8  | 47.059 | 548.95 |
| 528.96 | 15.43078 | 549.96 | 47.057 | 549.12 |
| 529.13 | 15.42568 | 550.13 | 47.054 | 549.29 |
| 529.3  | 15.42228 | 550.3  | 47.052 | 549.45 |
| 529.47 | 15.42058 | 550.47 | 47.047 | 549.62 |
| 529.64 | 15.41548 | 550.64 | 47.042 | 549.79 |
| 529.81 | 15.41038 | 550.81 | 47.039 | 549.96 |
| 529.98 | 15.40698 | 550.98 | 47.034 | 550.13 |
| 530.15 | 15.40188 | 551.15 | 47.034 | 550.3  |
| 530.32 | 15.39848 | 551.32 | 47.029 | 550.47 |
| 530.49 | 15.39678 | 551.49 | 47.027 | 550.64 |
| 530.66 | 15.39338 | 551.65 | 47.024 | 550.81 |
| 530.84 | 15.38998 | 551.82 | 47.019 | 550.98 |
| 531.01 | 15.38658 | 551.99 | 47.019 | 551.15 |
| 531.18 | 15.38148 | 552.16 | 47.014 | 551.32 |
| 531.35 | 15.37638 | 552.33 | 47.009 | 551.49 |
| 531.52 | 15.37128 | 552.5  | 47.004 | 551.65 |
| 531.69 | 15.36788 | 552.67 | 46.999 | 551.82 |
| 531.86 | 15.36278 | 552.84 | 46.997 | 551.99 |
| 532.03 | 15.35938 | 553.01 | 46.992 | 552.16 |
| 532.2  | 15.35598 | 553.18 | 46.989 | 552.33 |
| 532.37 | 15.35088 | 553.35 | 46.984 | 552.5  |
| 532.54 | 15.34578 | 553.52 | 46.982 | 552.67 |
| 532.71 | 15.34068 | 553.69 | 46.977 | 552.84 |
| 532.88 | 15.33728 | 553.86 | 46.974 | 553.01 |
| 533.05 | 15.33388 | 554.02 | 46.972 | 553.18 |
| 533.22 | 15.33218 | 554.19 | 46.967 | 553.35 |
| 533.39 | 15.32878 | 554.36 | 46.964 | 553.52 |
| 533.56 | 15.32708 | 554.53 | 46.962 | 553.69 |
| 533.73 | 15.32368 | 554.7  | 46.962 | 553.86 |
| 533.9  | 15.32198 | 554.87 | 46.957 | 554.02 |
| 534.07 | 15.31858 | 555.04 | 46.954 | 554.19 |
| 534.24 | 15.31688 | 555.21 | 46.952 | 554.36 |
| 534.41 | 15.31348 | 555.38 | 46.947 | 554.53 |
| 534.58 | 15.31008 | 555.55 | 46.944 | 554.7  |
| 534.75 | 15.30668 | 555.72 | 46.939 | 554.87 |
| 534.92 | 15.30498 | 555.89 | 46.937 | 555.04 |
| 535.09 | 15.30158 | 556.06 | 46.932 | 555.21 |
| 535.26 | 15.29988 | 556.22 | 46.929 | 555.38 |
| 535.43 | 15.29648 | 556.39 | 46.927 | 555.55 |
| 535.6  | 15.29308 | 556.56 | 46.924 | 555.72 |
| 535.77 | 15.29138 | 556.73 | 46.919 | 555.89 |
| 535.94 | 15.28798 | 556.9  | 46.919 | 556.06 |
| 536.11 | 15.28458 | 557.07 | 46.914 | 556.23 |
| 536.28 | 15.28118 | 557.24 | 46.912 | 556.39 |
| 536.45 | 15.27948 | 557.41 | 46.909 | 556.56 |
| 536.62 | 15.27778 | 557.58 | 46.907 | 556.73 |
| 536.79 | 15.27608 | 557.75 | 46.907 | 556.9  |
| 536.96 | 15.27268 | 557.92 | 46.902 | 557.07 |
| 537.13 | 15.26928 | 558.09 | 46.899 | 557.24 |
| 537.3  | 15.26758 | 558.26 | 46.897 | 557.41 |
| 537.47 | 15.26588 | 558.43 | 46.895 | 557.58 |

|        |          |        |        |        |
|--------|----------|--------|--------|--------|
| 537.64 | 15.26418 | 558.59 | 46.89  | 557.75 |
| 537.81 | 15.26078 | 558.76 | 46.887 | 557.92 |
| 537.98 | 15.25738 | 558.93 | 46.887 | 558.09 |
| 538.15 | 15.25568 | 559.1  | 46.882 | 558.26 |
| 538.32 | 15.25568 | 559.27 | 46.877 | 558.43 |
| 538.49 | 15.25228 | 559.44 | 46.875 | 558.6  |
| 538.66 | 15.25058 | 559.61 | 46.872 | 558.77 |
| 538.83 | 15.24888 | 559.78 | 46.87  | 558.94 |
| 539    | 15.24718 | 559.95 | 46.867 | 559.1  |
| 539.17 | 15.24548 | 560.12 | 46.862 | 559.27 |
| 539.34 | 15.24378 | 560.29 | 46.86  | 559.44 |
| 539.51 | 15.24208 | 560.46 | 46.857 | 559.61 |
| 539.68 | 15.24038 | 560.63 | 46.855 | 559.78 |
| 539.85 | 15.23698 | 560.8  | 46.852 | 559.95 |
| 540.02 | 15.23528 | 560.97 | 46.85  | 560.12 |
| 540.19 | 15.23358 | 561.14 | 46.845 | 560.29 |
| 540.36 | 15.23188 | 561.3  | 46.845 | 560.46 |
| 540.53 | 15.23018 | 561.47 | 46.842 | 560.63 |
| 540.7  | 15.22678 | 561.64 | 46.84  | 560.8  |
| 540.87 | 15.22508 | 561.81 | 46.837 | 560.97 |
| 541.05 | 15.22338 | 561.98 | 46.835 | 561.14 |
| 541.22 | 15.22168 | 562.15 | 46.832 | 561.31 |
| 541.39 | 15.21998 | 562.32 | 46.83  | 561.48 |
| 541.56 | 15.21658 | 562.49 | 46.827 | 561.65 |
| 541.73 | 15.21318 | 562.66 | 46.825 | 561.82 |
| 541.9  | 15.21148 | 562.83 | 46.82  | 561.99 |
| 542.07 | 15.20808 | 563    | 46.817 | 562.15 |
| 542.24 | 15.20468 | 563.17 | 46.812 | 562.32 |
| 542.41 | 15.20128 | 563.34 | 46.805 | 562.49 |
| 542.58 | 15.19788 | 563.51 | 46.802 | 562.66 |
| 542.75 | 15.19448 | 563.68 | 46.8   | 562.83 |
| 542.92 | 15.19278 | 563.85 | 46.797 | 563    |
| 543.09 | 15.18938 | 564.01 | 46.795 | 563.17 |
| 543.26 | 15.18598 | 564.18 | 46.79  | 563.34 |
| 543.43 | 15.18428 | 564.35 | 46.785 | 563.51 |
| 543.6  | 15.18088 | 564.52 | 46.782 | 563.68 |
| 543.77 | 15.17918 | 564.69 | 46.777 | 563.85 |
| 543.94 | 15.17578 | 564.86 | 46.772 | 564.02 |
| 544.11 | 15.17238 | 565.03 | 46.77  | 564.19 |
| 544.28 | 15.17068 | 565.2  | 46.765 | 564.36 |
| 544.45 | 15.16728 | 565.37 | 46.76  | 564.53 |
| 544.62 | 15.16388 | 565.54 | 46.757 | 564.7  |
| 544.79 | 15.16048 | 565.71 | 46.752 | 564.87 |
| 544.96 | 15.15878 | 565.88 | 46.752 | 565.04 |
| 545.13 | 15.15708 | 566.05 | 46.747 | 565.2  |
| 545.3  | 15.15368 | 566.22 | 46.745 | 565.37 |
| 545.47 | 15.15028 | 566.39 | 46.742 | 565.54 |
| 545.64 | 15.14688 | 566.56 | 46.737 | 565.71 |
| 545.81 | 15.14688 | 566.73 | 46.737 | 565.88 |
| 545.98 | 15.14348 | 566.9  | 46.732 | 566.05 |
| 546.15 | 15.14008 | 567.06 | 46.73  | 566.22 |
| 546.32 | 15.13498 | 567.23 | 46.727 | 566.39 |
| 546.49 | 15.13328 | 567.4  | 46.722 | 566.56 |
| 546.67 | 15.12988 | 567.57 | 46.722 | 566.73 |

|        |          |        |        |        |
|--------|----------|--------|--------|--------|
| 546.84 | 15.12478 | 567.74 | 46.72  | 566.9  |
| 547.01 | 15.11968 | 567.91 | 46.715 | 567.07 |
| 547.18 | 15.11628 | 568.08 | 46.71  | 567.24 |
| 547.35 | 15.10948 | 568.25 | 46.707 | 567.41 |
| 547.52 | 15.10608 | 568.42 | 46.702 | 567.58 |
| 547.69 | 15.10268 | 568.59 | 46.7   | 567.75 |
| 547.86 | 15.09928 | 568.76 | 46.697 | 567.92 |
| 548.03 | 15.09588 | 568.93 | 46.692 | 568.09 |
| 548.2  | 15.09248 | 569.1  | 46.69  | 568.26 |
| 548.37 | 15.09078 | 569.27 | 46.687 | 568.43 |
| 548.54 | 15.08738 | 569.44 | 46.685 | 568.6  |
| 548.71 | 15.08568 | 569.61 | 46.682 | 568.77 |
| 548.88 | 15.08228 | 569.78 | 46.68  | 568.94 |
| 549.05 | 15.07888 | 569.94 | 46.675 | 569.11 |
| 549.22 | 15.07718 | 570.11 | 46.672 | 569.27 |
| 549.39 | 15.07378 | 570.28 | 46.67  | 569.44 |
| 549.56 | 15.06868 | 570.45 | 46.667 | 569.61 |
| 549.73 | 15.06698 | 570.62 | 46.662 | 569.78 |
| 549.9  | 15.06358 | 570.79 | 46.66  | 569.95 |
| 550.07 | 15.06188 | 570.96 | 46.657 | 570.12 |
| 550.24 | 15.05848 | 571.13 | 46.652 | 570.29 |
| 550.42 | 15.05508 | 571.3  | 46.65  | 570.46 |
| 550.59 | 15.05168 | 571.47 | 46.647 | 570.63 |
| 550.76 | 15.04488 | 571.64 | 46.642 | 570.8  |
| 550.93 | 15.04148 | 571.81 | 46.64  | 570.97 |
| 551.1  | 15.03468 | 571.98 | 46.637 | 571.14 |
| 551.27 | 15.03128 | 572.15 | 46.632 | 571.31 |
| 551.44 | 15.02788 | 572.32 | 46.63  | 571.48 |
| 551.61 | 15.02448 | 572.49 | 46.627 | 571.65 |
| 551.78 | 15.01938 | 572.66 | 46.625 | 571.82 |
| 551.95 | 15.01768 | 572.83 | 46.622 | 571.99 |
| 552.12 | 15.01428 | 573    | 46.62  | 572.16 |
| 552.29 | 15.01088 | 573.17 | 46.617 | 572.33 |
| 552.46 | 15.00748 | 573.34 | 46.615 | 572.5  |
| 552.63 | 15.00578 | 573.51 | 46.61  | 572.67 |
| 552.8  | 14.99898 | 573.68 | 46.607 | 572.84 |
| 552.97 | 14.99388 | 573.84 | 46.605 | 573.01 |
| 553.14 | 14.98878 | 574.01 | 46.6   | 573.18 |
| 553.31 | 14.98368 | 574.18 | 46.597 | 573.35 |
| 553.48 | 14.97858 | 574.35 | 46.592 | 573.52 |
| 553.65 | 14.97518 | 574.52 | 46.59  | 573.69 |
| 553.82 | 14.97178 | 574.69 | 46.585 | 573.86 |
| 553.99 | 14.96838 | 574.86 | 46.582 | 574.03 |
| 554.17 | 14.96498 | 575.03 | 46.58  | 574.2  |
| 554.34 | 14.96158 | 575.2  | 46.575 | 574.37 |
| 554.51 | 14.95478 | 575.37 | 46.572 | 574.54 |
| 554.68 | 14.95138 | 575.54 | 46.57  | 574.71 |
| 554.85 | 14.94798 | 575.71 | 46.567 | 574.88 |
| 555.02 | 14.94288 | 575.88 | 46.565 | 575.05 |
| 555.19 | 14.94118 | 576.05 | 46.56  | 575.22 |
| 555.36 | 14.93608 | 576.22 | 46.557 | 575.39 |
| 555.53 | 14.93268 | 576.39 | 46.555 | 575.56 |
| 555.7  | 14.92758 | 576.56 | 46.55  | 575.73 |
| 555.87 | 14.92588 | 576.73 | 46.548 | 575.89 |

|        |          |        |        |        |
|--------|----------|--------|--------|--------|
| 556.04 | 14.92248 | 576.9  | 46.543 | 576.06 |
| 556.21 | 14.91738 | 577.07 | 46.538 | 576.23 |
| 556.38 | 14.91398 | 577.24 | 46.535 | 576.4  |
| 556.55 | 14.91058 | 577.41 | 46.533 | 576.57 |
| 556.72 | 14.90718 | 577.58 | 46.528 | 576.74 |
| 556.89 | 14.89868 | 577.75 | 46.523 | 576.91 |
| 557.06 | 14.89358 | 577.92 | 46.52  | 577.08 |
| 557.23 | 14.89188 | 578.09 | 46.518 | 577.25 |
| 557.4  | 14.88678 | 578.26 | 46.513 | 577.42 |
| 557.58 | 14.88338 | 578.43 | 46.51  | 577.59 |
| 557.75 | 14.87828 | 578.6  | 46.508 | 577.76 |
| 557.92 | 14.87148 | 578.77 | 46.503 | 577.93 |
| 558.09 | 14.86638 | 578.94 | 46.5   | 578.1  |
| 558.26 | 14.86298 | 579.11 | 46.498 | 578.27 |
| 558.43 | 14.85788 | 579.28 | 46.495 | 578.44 |
| 558.6  | 14.85618 | 579.44 | 46.49  | 578.61 |
| 558.77 | 14.85278 | 579.61 | 46.488 | 578.78 |
| 558.94 | 14.84938 | 579.78 | 46.485 | 578.95 |
| 559.11 | 14.84428 | 579.95 | 46.483 | 579.12 |
| 559.28 | 14.83918 | 580.12 | 46.48  | 579.29 |
| 559.45 | 14.83578 | 580.29 | 46.478 | 579.46 |
| 559.62 | 14.83068 | 580.46 | 46.475 | 579.63 |
| 559.79 | 14.82558 | 580.63 | 46.473 | 579.8  |
| 559.96 | 14.82048 | 580.8  | 46.468 | 579.97 |
| 560.13 | 14.81708 | 580.97 | 46.465 | 580.14 |
| 560.3  | 14.81368 | 581.14 | 46.463 | 580.31 |
| 560.47 | 14.80688 | 581.31 | 46.46  | 580.48 |
| 560.64 | 14.80178 | 581.48 | 46.458 | 580.65 |
| 560.81 | 14.79498 | 581.65 | 46.455 | 580.82 |
| 560.98 | 14.78988 | 581.82 | 46.453 | 580.99 |
| 561.16 | 14.78648 | 581.99 | 46.445 | 581.16 |
| 561.33 | 14.78138 | 582.16 | 46.44  | 581.33 |
| 561.5  | 14.77628 | 582.33 | 46.44  | 581.5  |
| 561.67 | 14.77288 | 582.5  | 46.438 | 581.67 |
| 561.84 | 14.76778 | 582.67 | 46.43  | 581.84 |
| 562.01 | 14.76438 | 582.84 | 46.425 | 582.01 |
| 562.18 | 14.76098 | 583.01 | 46.42  | 582.18 |
| 562.35 | 14.75758 | 583.18 | 46.418 | 582.35 |
| 562.52 | 14.75078 | 583.35 | 46.418 | 582.52 |
| 562.69 | 14.74568 | 583.52 | 46.413 | 582.69 |
| 562.86 | 14.73888 | 583.69 | 46.41  | 582.86 |
| 563.03 | 14.73378 | 583.86 | 46.408 | 583.03 |
| 563.2  | 14.72868 | 584.03 | 46.405 | 583.2  |
| 563.37 | 14.72358 | 584.2  | 46.403 | 583.37 |
| 563.54 | 14.72018 | 584.37 | 46.398 | 583.54 |
| 563.71 | 14.71168 | 584.54 | 46.395 | 583.71 |
| 563.88 | 14.70658 | 584.71 | 46.393 | 583.88 |
| 564.05 | 14.70488 | 584.88 | 46.388 | 584.05 |
| 564.22 | 14.69978 | 585.05 | 46.385 | 584.22 |
| 564.39 | 14.69468 | 585.22 | 46.383 | 584.39 |
| 564.57 | 14.69128 | 585.39 | 46.38  | 584.56 |
| 564.74 | 14.68618 | 585.56 | 46.378 | 584.73 |
| 564.91 | 14.68108 | 585.73 | 46.375 | 584.9  |
| 565.08 | 14.67428 | 585.9  | 46.373 | 585.07 |

|         |           |         |         |         |
|---------|-----------|---------|---------|---------|
| 565. 25 | 14. 67258 | 586. 07 | 46. 368 | 585. 24 |
| 565. 42 | 14. 66748 | 586. 24 | 46. 363 | 585. 4  |
| 565. 59 | 14. 66238 | 586. 41 | 46. 358 | 585. 57 |
| 565. 76 | 14. 65898 | 586. 58 | 46. 353 | 585. 74 |
| 565. 93 | 14. 65048 | 586. 75 | 46. 348 | 585. 91 |
| 566. 1  | 14. 64708 | 586. 92 | 46. 345 | 586. 08 |
| 566. 27 | 14. 64198 | 587. 09 | 46. 345 | 586. 25 |
| 566. 44 | 14. 63688 | 587. 26 | 46. 34  | 586. 42 |
| 566. 61 | 14. 63178 | 587. 43 | 46. 338 | 586. 59 |
| 566. 78 | 14. 62498 | 587. 6  | 46. 335 | 586. 76 |
| 566. 95 | 14. 62158 | 587. 77 | 46. 33  | 586. 93 |
| 567. 12 | 14. 61648 | 587. 94 | 46. 33  | 587. 1  |
| 567. 3  | 14. 61308 | 588. 11 | 46. 328 | 587. 27 |
| 567. 47 | 14. 60628 | 588. 28 | 46. 325 | 587. 44 |
| 567. 64 | 14. 59948 | 588. 45 | 46. 32  | 587. 61 |
| 567. 81 | 14. 59608 | 588. 62 | 46. 318 | 587. 78 |
| 567. 98 | 14. 58928 | 588. 79 | 46. 313 | 587. 95 |
| 568. 15 | 14. 58248 | 588. 96 | 46. 31  | 588. 12 |
| 568. 32 | 14. 57738 | 589. 13 | 46. 308 | 588. 29 |
| 568. 49 | 14. 57228 | 589. 3  | 46. 303 | 588. 46 |
| 568. 66 | 14. 56888 | 589. 47 | 46. 303 | 588. 63 |
| 568. 83 | 14. 56378 | 589. 64 | 46. 298 | 588. 8  |
| 569     | 14. 55698 | 589. 81 | 46. 295 | 588. 97 |
| 569. 17 | 14. 55018 | 589. 98 | 46. 29  | 589. 14 |
| 569. 34 | 14. 54678 | 590. 15 | 46. 288 | 589. 31 |
| 569. 51 | 14. 54168 | 590. 32 | 46. 285 | 589. 48 |
| 569. 68 | 14. 53828 | 590. 49 | 46. 283 | 589. 65 |
| 569. 85 | 14. 53318 | 590. 66 | 46. 275 | 589. 82 |
| 570. 02 | 14. 52808 | 590. 83 | 46. 27  | 589. 99 |
| 570. 2  | 14. 52298 | 591     | 46. 268 | 590. 16 |
| 570. 37 | 14. 51958 | 591. 17 | 46. 26  | 590. 33 |
| 570. 54 | 14. 51448 | 591. 34 | 46. 258 | 590. 5  |
| 570. 71 | 14. 50938 | 591. 51 | 46. 253 | 590. 67 |
| 570. 88 | 14. 50598 | 591. 68 | 46. 25  | 590. 84 |
| 571. 05 | 14. 50088 | 591. 85 | 46. 248 | 591. 01 |
| 571. 22 | 14. 49578 | 592. 02 | 46. 245 | 591. 18 |
| 571. 39 | 14. 48898 | 592. 19 | 46. 243 | 591. 35 |
| 571. 56 | 14. 48558 | 592. 36 | 46. 24  | 591. 52 |
| 571. 73 | 14. 48048 | 592. 53 | 46. 238 | 591. 69 |
| 571. 9  | 14. 47538 | 592. 7  | 46. 235 | 591. 86 |
| 572. 07 | 14. 46858 | 592. 87 | 46. 233 | 592. 03 |
| 572. 24 | 14. 46178 | 593. 04 | 46. 23  | 592. 2  |
| 572. 41 | 14. 45498 | 593. 21 | 46. 225 | 592. 37 |
| 572. 59 | 14. 44818 | 593. 38 | 46. 223 | 592. 54 |
| 572. 76 | 14. 44308 | 593. 55 | 46. 22  | 592. 71 |
| 572. 93 | 14. 43968 | 593. 72 | 46. 218 | 592. 88 |
| 573. 1  | 14. 43458 | 593. 89 | 46. 213 | 593. 05 |
| 573. 27 | 14. 42948 | 594. 06 | 46. 208 | 593. 23 |
| 573. 44 | 14. 42438 | 594. 23 | 46. 203 | 593. 4  |
| 573. 61 | 14. 41928 | 594. 4  | 46. 201 | 593. 57 |
| 573. 78 | 14. 41418 | 594. 57 | 46. 198 | 593. 74 |
| 573. 95 | 14. 41078 | 594. 74 | 46. 196 | 593. 91 |
| 574. 12 | 14. 40568 | 594. 91 | 46. 193 | 594. 08 |
| 574. 29 | 14. 39888 | 595. 08 | 46. 188 | 594. 25 |

|         |           |         |         |         |
|---------|-----------|---------|---------|---------|
| 574. 46 | 14. 39378 | 595. 25 | 46. 186 | 594. 42 |
| 574. 63 | 14. 38868 | 595. 42 | 46. 186 | 594. 59 |
| 574. 8  | 14. 38698 | 595. 59 | 46. 181 | 594. 76 |
| 574. 97 | 14. 38358 | 595. 76 | 46. 178 | 594. 93 |
| 575. 14 | 14. 37678 | 595. 93 | 46. 173 | 595. 1  |
| 575. 32 | 14. 36999 | 596. 1  | 46. 171 | 595. 27 |
| 575. 49 | 14. 36319 | 596. 27 | 46. 168 | 595. 44 |
| 575. 66 | 14. 35639 | 596. 44 | 46. 163 | 595. 61 |
| 575. 83 | 14. 35299 | 596. 61 | 46. 161 | 595. 78 |
| 576     | 14. 34959 | 596. 78 | 46. 156 | 595. 95 |
| 576. 17 | 14. 34449 | 596. 95 | 46. 153 | 596. 12 |
| 576. 34 | 14. 34279 | 597. 12 | 46. 148 | 596. 29 |
| 576. 51 | 14. 33939 | 597. 29 | 46. 146 | 596. 46 |
| 576. 68 | 14. 33259 | 597. 46 | 46. 143 | 596. 63 |
| 576. 85 | 14. 32749 | 597. 63 | 46. 138 | 596. 8  |
| 577. 02 | 14. 32069 | 597. 8  | 46. 136 | 596. 97 |
| 577. 19 | 14. 31559 | 597. 97 | 46. 133 | 597. 14 |
| 577. 36 | 14. 30879 | 598. 14 | 46. 131 | 597. 31 |
| 577. 53 | 14. 30199 | 598. 31 | 46. 126 | 597. 48 |
| 577. 7  | 14. 29689 | 598. 48 | 46. 123 | 597. 65 |
| 577. 88 | 14. 29179 | 598. 65 | 46. 118 | 597. 82 |
| 578. 05 | 14. 29009 | 598. 82 | 46. 118 | 597. 99 |
| 578. 22 | 14. 28499 | 598. 99 | 46. 113 | 598. 16 |
| 578. 39 | 14. 27819 | 599. 16 | 46. 111 | 598. 33 |
| 578. 56 | 14. 27139 | 599. 33 | 46. 108 | 598. 5  |
| 578. 73 | 14. 26289 | 599. 5  | 46. 106 | 598. 67 |
| 578. 9  | 14. 25949 | 599. 67 | 46. 101 | 598. 84 |
| 579. 07 | 14. 25609 | 599. 84 | 46. 098 | 599. 01 |
| 579. 24 | 14. 25269 | 600. 01 | 46. 096 | 599. 18 |
| 579. 41 | 14. 24929 | 600. 18 | 46. 093 | 599. 35 |
| 579. 58 | 14. 24589 | 600. 35 | 46. 086 | 599. 52 |
| 579. 75 | 14. 24079 | 600. 52 | 46. 081 | 599. 69 |
| 579. 92 | 14. 23399 | 600. 69 | 46. 078 | 599. 86 |
| 580. 1  | 14. 22889 | 600. 86 | 46. 073 | 600. 03 |
| 580. 27 | 14. 22039 | 601. 03 | 46. 071 | 600. 2  |
| 580. 44 | 14. 21529 | 601. 2  | 46. 068 | 600. 37 |
| 580. 61 | 14. 21019 | 601. 37 | 46. 066 | 600. 54 |
| 580. 78 | 14. 20339 | 601. 54 | 46. 063 | 600. 71 |
| 580. 95 | 14. 19829 | 601. 72 | 46. 061 | 600. 88 |
| 581. 12 | 14. 19489 | 601. 89 | 46. 058 | 601. 05 |
| 581. 29 | 14. 19319 | 602. 06 | 46. 053 | 601. 22 |
| 581. 46 | 14. 18809 | 602. 23 | 46. 048 | 601. 39 |
| 581. 63 | 14. 18129 | 602. 4  | 46. 046 | 601. 56 |
| 581. 8  | 14. 17619 | 602. 57 | 46. 043 | 601. 73 |
| 581. 97 | 14. 17109 | 602. 74 | 46. 041 | 601. 9  |
| 582. 14 | 14. 16769 | 602. 91 | 46. 033 | 602. 07 |
| 582. 32 | 14. 16599 | 603. 08 | 46. 031 | 602. 24 |
| 582. 49 | 14. 16089 | 603. 25 | 46. 028 | 602. 41 |
| 582. 66 | 14. 15409 | 603. 42 | 46. 023 | 602. 58 |
| 582. 83 | 14. 14899 | 603. 59 | 46. 018 | 602. 75 |
| 583     | 14. 14049 | 603. 76 | 46. 016 | 602. 92 |
| 583. 17 | 14. 13369 | 603. 93 | 46. 011 | 603. 09 |
| 583. 34 | 14. 13369 | 604. 1  | 46. 008 | 603. 27 |
| 583. 51 | 14. 12689 | 604. 27 | 46. 001 | 603. 44 |

|        |          |        |        |        |
|--------|----------|--------|--------|--------|
| 583.68 | 14.12349 | 604.44 | 45.998 | 603.61 |
| 583.85 | 14.11839 | 604.61 | 45.996 | 603.78 |
| 584.02 | 14.10989 | 604.78 | 45.991 | 603.95 |
| 584.19 | 14.10819 | 604.95 | 45.986 | 604.12 |
| 584.36 | 14.10479 | 605.12 | 45.983 | 604.29 |
| 584.53 | 14.09969 | 605.29 | 45.978 | 604.46 |
| 584.71 | 14.09459 | 605.46 | 45.976 | 604.63 |
| 584.88 | 14.08439 | 605.63 | 45.973 | 604.8  |
| 585.05 | 14.07759 | 605.8  | 45.971 | 604.97 |
| 585.22 | 14.07249 | 605.97 | 45.968 | 605.14 |
| 585.39 | 14.06909 | 606.14 | 45.966 | 605.31 |
| 585.56 | 14.06739 | 606.31 | 45.961 | 605.48 |
| 585.73 | 14.06059 | 606.48 | 45.958 | 605.65 |
| 585.9  | 14.05549 | 606.65 | 45.953 | 605.82 |
| 586.07 | 14.04869 | 606.82 | 45.951 | 605.99 |
| 586.24 | 14.04359 | 606.99 | 45.948 | 606.16 |
| 586.41 | 14.04019 | 607.16 | 45.946 | 606.33 |
| 586.58 | 14.03679 | 607.33 | 45.941 | 606.5  |
| 586.76 | 14.03339 | 607.5  | 45.936 | 606.67 |
| 586.93 | 14.02829 | 607.67 | 45.933 | 606.84 |
| 587.1  | 14.02319 | 607.84 | 45.928 | 607.02 |
| 587.27 | 14.01469 | 608.01 | 45.926 | 607.19 |
| 587.44 | 14.01129 | 608.18 | 45.921 | 607.36 |
| 587.61 | 14.00619 | 608.35 | 45.918 | 607.53 |
| 587.78 | 14.00109 | 608.52 | 45.913 | 607.7  |
| 587.95 | 13.99259 | 608.69 | 45.908 | 607.87 |
| 588.12 | 13.98579 | 608.86 | 45.906 | 608.04 |
| 588.29 | 13.97899 | 609.03 | 45.903 | 608.21 |
| 588.47 | 13.97389 | 609.2  | 45.901 | 608.38 |
| 588.64 | 13.97049 | 609.38 | 45.898 | 608.55 |
| 588.81 | 13.96539 | 609.55 | 45.896 | 608.72 |
| 588.98 | 13.96029 | 609.72 | 45.893 | 608.89 |
| 589.15 | 13.95349 | 609.89 | 45.891 | 609.06 |
| 589.32 | 13.94839 | 610.06 | 45.888 | 609.23 |
| 589.49 | 13.94329 | 610.23 | 45.886 | 609.4  |
| 589.66 | 13.93649 | 610.4  | 45.883 | 609.57 |
| 589.83 | 13.92799 | 610.57 | 45.878 | 609.74 |
| 590    | 13.92459 | 610.74 | 45.873 | 609.91 |
| 590.17 | 13.91949 | 610.91 | 45.868 | 610.08 |
| 590.35 | 13.91099 | 611.08 | 45.863 | 610.25 |
| 590.52 | 13.90419 | 611.25 | 45.861 | 610.42 |
| 590.69 | 13.90079 | 611.42 | 45.859 | 610.59 |
| 590.86 | 13.89739 | 611.59 | 45.854 | 610.76 |
| 591.03 | 13.89739 | 611.76 | 45.854 | 610.93 |
| 591.2  | 13.89229 | 611.93 | 45.849 | 611.1  |
| 591.37 | 13.88549 | 612.1  | 45.846 | 611.27 |
| 591.54 | 13.87869 | 612.27 | 45.844 | 611.44 |
| 591.71 | 13.87019 | 612.44 | 45.841 | 611.61 |
| 591.88 | 13.86509 | 612.61 | 45.836 | 611.79 |
| 592.06 | 13.85999 | 612.78 | 45.834 | 611.96 |
| 592.23 | 13.85319 | 612.95 | 45.829 | 612.13 |
| 592.4  | 13.85149 | 613.12 | 45.826 | 612.3  |
| 592.57 | 13.84469 | 613.29 | 45.816 | 612.47 |
| 592.74 | 13.83789 | 613.46 | 45.814 | 612.64 |

|        |          |        |        |        |
|--------|----------|--------|--------|--------|
| 592.91 | 13.83279 | 613.63 | 45.809 | 612.81 |
| 593.08 | 13.82599 | 613.8  | 45.806 | 612.98 |
| 593.25 | 13.82089 | 613.97 | 45.804 | 613.15 |
| 593.42 | 13.81579 | 614.14 | 45.801 | 613.32 |
| 593.59 | 13.81239 | 614.31 | 45.799 | 613.49 |
| 593.76 | 13.80899 | 614.48 | 45.794 | 613.66 |
| 593.93 | 13.80219 | 614.66 | 45.791 | 613.83 |
| 594.11 | 13.79539 | 614.83 | 45.789 | 614    |
| 594.28 | 13.78689 | 615    | 45.784 | 614.17 |
| 594.45 | 13.78519 | 615.17 | 45.781 | 614.34 |
| 594.62 | 13.78009 | 615.34 | 45.779 | 614.51 |
| 594.79 | 13.77329 | 615.51 | 45.774 | 614.69 |
| 594.96 | 13.76819 | 615.68 | 45.771 | 614.86 |
| 595.13 | 13.76309 | 615.85 | 45.769 | 615.03 |
| 595.3  | 13.75969 | 616.02 | 45.764 | 615.2  |
| 595.47 | 13.75289 | 616.19 | 45.761 | 615.37 |
| 595.64 | 13.75119 | 616.36 | 45.759 | 615.54 |
| 595.82 | 13.74609 | 616.53 | 45.754 | 615.71 |
| 595.99 | 13.73759 | 616.7  | 45.749 | 615.88 |
| 596.16 | 13.73419 | 616.87 | 45.746 | 616.05 |
| 596.33 | 13.72909 | 617.04 | 45.744 | 616.22 |
| 596.5  | 13.71889 | 617.21 | 45.739 | 616.39 |
| 596.67 | 13.71379 | 617.38 | 45.736 | 616.56 |
| 596.84 | 13.70869 | 617.55 | 45.734 | 616.73 |
| 597.01 | 13.70529 | 617.72 | 45.729 | 616.9  |
| 597.18 | 13.69679 | 617.89 | 45.726 | 617.07 |
| 597.36 | 13.69169 | 618.06 | 45.724 | 617.24 |
| 597.53 | 13.68319 | 618.23 | 45.719 | 617.41 |
| 597.7  | 13.67639 | 618.4  | 45.716 | 617.58 |
| 597.87 | 13.67469 | 618.57 | 45.714 | 617.75 |
| 598.04 | 13.66789 | 618.74 | 45.709 | 617.92 |
| 598.21 | 13.66109 | 618.92 | 45.704 | 618.1  |
| 598.38 | 13.65599 | 619.09 | 45.704 | 618.27 |
| 598.55 | 13.65089 | 619.26 | 45.699 | 618.44 |
| 598.72 | 13.64749 | 619.43 | 45.694 | 618.61 |
| 598.9  | 13.64069 | 619.6  | 45.691 | 618.78 |
| 599.07 | 13.63559 | 619.77 | 45.686 | 618.95 |
| 599.24 | 13.63049 | 619.94 | 45.684 | 619.12 |
| 599.41 | 13.62539 | 620.11 | 45.679 | 619.29 |
| 599.58 | 13.62029 | 620.28 | 45.674 | 619.46 |
| 599.75 | 13.61689 | 620.45 | 45.671 | 619.63 |
| 599.92 | 13.61009 | 620.62 | 45.669 | 619.8  |
| 600.09 | 13.60839 | 620.79 | 45.664 | 619.97 |
| 600.26 | 13.59989 | 620.96 | 45.661 | 620.14 |
| 600.43 | 13.59309 | 621.13 | 45.659 | 620.31 |
| 600.6  | 13.58459 | 621.3  | 45.654 | 620.48 |
| 600.78 | 13.57949 | 621.47 | 45.651 | 620.65 |
| 600.95 | 13.57099 | 621.64 | 45.646 | 620.82 |
| 601.12 | 13.56929 | 621.81 | 45.644 | 620.99 |
| 601.29 | 13.56249 | 621.98 | 45.636 | 621.17 |
| 601.46 | 13.55909 | 622.15 | 45.634 | 621.34 |
| 601.63 | 13.55059 | 622.33 | 45.631 | 621.51 |
| 601.8  | 13.54549 | 622.5  | 45.629 | 621.68 |
| 601.98 | 13.53869 | 622.67 | 45.624 | 621.85 |



|         |           |         |         |         |
|---------|-----------|---------|---------|---------|
| 602. 15 | 13. 53189 | 622. 84 | 45. 621 | 622. 02 |
| 602. 32 | 13. 52509 | 623. 01 | 45. 616 | 622. 19 |
| 602. 49 | 13. 51999 | 623. 18 | 45. 614 | 622. 36 |
| 602. 66 | 13. 51319 | 623. 35 | 45. 611 | 622. 53 |
| 602. 83 | 13. 50639 | 623. 52 | 45. 609 | 622. 7  |
| 603     | 13. 50129 | 623. 69 | 45. 606 | 622. 87 |
| 603. 17 | 13. 49449 | 623. 86 | 45. 604 | 623. 04 |
| 603. 34 | 13. 49109 | 624. 03 | 45. 599 | 623. 21 |
| 603. 52 | 13. 48599 | 624. 2  | 45. 596 | 623. 38 |
| 603. 69 | 13. 48089 | 624. 37 | 45. 591 | 623. 54 |
| 603. 86 | 13. 47069 | 624. 54 | 45. 589 | 623. 72 |
| 604. 03 | 13. 46389 | 624. 71 | 45. 586 | 623. 88 |
| 604. 2  | 13. 45539 | 624. 88 | 45. 581 | 624. 05 |
| 604. 37 | 13. 45199 | 625. 05 | 45. 579 | 624. 22 |
| 604. 54 | 13. 44859 | 625. 22 | 45. 574 | 624. 39 |
| 604. 72 | 13. 44519 | 625. 39 | 45. 569 | 624. 56 |
| 604. 89 | 13. 44179 | 625. 55 | 45. 566 | 624. 73 |
| 605. 06 | 13. 43329 | 625. 72 | 45. 564 | 624. 9  |
| 605. 23 | 13. 42649 | 625. 89 | 45. 561 | 625. 07 |
| 605. 4  | 13. 42139 | 626. 06 | 45. 556 | 625. 24 |
| 605. 57 | 13. 41459 | 626. 23 | 45. 554 | 625. 41 |
| 605. 74 | 13. 41289 | 626. 4  | 45. 551 | 625. 58 |
| 605. 91 | 13. 40439 | 626. 57 | 45. 549 | 625. 75 |
| 606. 08 | 13. 40099 | 626. 74 | 45. 546 | 625. 92 |
| 606. 26 | 13. 39419 | 626. 91 | 45. 544 | 626. 09 |
| 606. 43 | 13. 38909 | 627. 08 | 45. 539 | 626. 26 |
| 606. 6  | 13. 38569 | 627. 25 | 45. 536 | 626. 43 |
| 606. 77 | 13. 37889 | 627. 42 | 45. 534 | 626. 6  |
| 606. 94 | 13. 37379 | 627. 59 | 45. 529 | 626. 77 |
| 607. 11 | 13. 36529 | 627. 76 | 45. 526 | 626. 94 |
| 607. 28 | 13. 36019 | 627. 93 | 45. 524 | 627. 11 |
| 607. 46 | 13. 35509 | 628. 1  | 45. 519 | 627. 28 |
| 607. 63 | 13. 34829 | 628. 27 | 45. 517 | 627. 45 |
| 607. 8  | 13. 33979 | 628. 44 | 45. 514 | 627. 62 |
| 607. 97 | 13. 33299 | 628. 61 | 45. 512 | 627. 78 |
| 608. 14 | 13. 32789 | 628. 78 | 45. 507 | 627. 95 |
| 608. 31 | 13. 32279 | 628. 94 | 45. 504 | 628. 12 |
| 608. 48 | 13. 31769 | 629. 11 | 45. 499 | 628. 29 |
| 608. 66 | 13. 31259 | 629. 28 | 45. 497 | 628. 46 |
| 608. 83 | 13. 30749 | 629. 45 | 45. 492 | 628. 63 |
| 609     | 13. 30239 | 629. 62 | 45. 487 | 628. 8  |
| 609. 17 | 13. 29899 | 629. 79 | 45. 482 | 628. 97 |
| 609. 34 | 13. 29219 | 629. 96 | 45. 477 | 629. 14 |
| 609. 51 | 13. 28539 | 630. 13 | 45. 472 | 629. 31 |
| 609. 68 | 13. 28029 | 630. 3  | 45. 469 | 629. 48 |
| 609. 86 | 13. 27689 | 630. 47 | 45. 467 | 629. 65 |
| 610. 03 | 13. 27179 | 630. 64 | 45. 462 | 629. 82 |
| 610. 2  | 13. 26669 | 630. 81 | 45. 459 | 629. 99 |
| 610. 37 | 13. 26159 | 630. 98 | 45. 454 | 630. 16 |
| 610. 54 | 13. 25479 | 631. 15 | 45. 449 | 630. 33 |
| 610. 71 | 13. 24969 | 631. 32 | 45. 447 | 630. 49 |
| 610. 88 | 13. 24629 | 631. 49 | 45. 444 | 630. 66 |
| 611. 06 | 13. 24119 | 631. 66 | 45. 442 | 630. 83 |
| 611. 23 | 13. 23269 | 631. 82 | 45. 437 | 631     |

|        |          |        |        |        |
|--------|----------|--------|--------|--------|
| 611.4  | 13.22589 | 631.99 | 45.434 | 631.17 |
| 611.57 | 13.22079 | 632.16 | 45.429 | 631.34 |
| 611.74 | 13.21569 | 632.33 | 45.427 | 631.51 |
| 611.91 | 13.21059 | 632.5  | 45.424 | 631.68 |
| 612.08 | 13.20379 | 632.67 | 45.422 | 631.85 |
| 612.26 | 13.20039 | 632.84 | 45.419 | 632.02 |
| 612.43 | 13.19529 | 633.01 | 45.417 | 632.19 |
| 612.6  | 13.18849 | 633.18 | 45.414 | 632.36 |
| 612.77 | 13.18339 | 633.35 | 45.409 | 632.53 |
| 612.94 | 13.17829 | 633.52 | 45.407 | 632.7  |
| 613.11 | 13.17319 | 633.69 | 45.402 | 632.87 |
| 613.28 | 13.16979 | 633.86 | 45.399 | 633.04 |
| 613.45 | 13.16299 | 634.03 | 45.394 | 633.21 |
| 613.63 | 13.15789 | 634.2  | 45.387 | 633.38 |
| 613.8  | 13.15109 | 634.36 | 45.384 | 633.54 |
| 613.97 | 13.14599 | 634.53 | 45.382 | 633.71 |
| 614.14 | 13.14259 | 634.7  | 45.377 | 633.88 |
| 614.31 | 13.13749 | 634.87 | 45.374 | 634.05 |
| 614.48 | 13.13069 | 635.04 | 45.369 | 634.22 |
| 614.65 | 13.12559 | 635.21 | 45.369 | 634.39 |
| 614.83 | 13.1188  | 635.38 | 45.367 | 634.56 |
| 615    | 13.1137  | 635.55 | 45.362 | 634.73 |
| 615.17 | 13.1103  | 635.72 | 45.357 | 634.9  |
| 615.34 | 13.1035  | 635.89 | 45.354 | 635.07 |
| 615.51 | 13.1018  | 636.06 | 45.349 | 635.24 |
| 615.68 | 13.095   | 636.23 | 45.347 | 635.41 |
| 615.85 | 13.0899  | 636.4  | 45.344 | 635.58 |
| 616.02 | 13.0814  | 636.57 | 45.339 | 635.75 |
| 616.2  | 13.078   | 636.74 | 45.334 | 635.92 |
| 616.37 | 13.0712  | 636.91 | 45.332 | 636.09 |
| 616.54 | 13.0695  | 637.07 | 45.329 | 636.26 |
| 616.71 | 13.0627  | 637.24 | 45.324 | 636.42 |
| 616.88 | 13.0576  | 637.41 | 45.319 | 636.59 |
| 617.05 | 13.0542  | 637.58 | 45.317 | 636.76 |
| 617.22 | 13.0474  | 637.75 | 45.312 | 636.93 |
| 617.4  | 13.0406  | 637.92 | 45.307 | 637.1  |
| 617.57 | 13.0372  | 638.09 | 45.302 | 637.27 |
| 617.74 | 13.0304  | 638.26 | 45.302 | 637.44 |
| 617.91 | 13.0253  | 638.43 | 45.297 | 637.61 |
| 618.08 | 13.0185  | 638.6  | 45.294 | 637.78 |
| 618.25 | 13.0134  | 638.77 | 45.289 | 637.95 |
| 618.42 | 13.0083  | 638.94 | 45.287 | 638.12 |
| 618.6  | 13.0032  | 639.11 | 45.284 | 638.29 |
| 618.77 | 12.9947  | 639.28 | 45.282 | 638.46 |
| 618.94 | 12.9896  | 639.45 | 45.279 | 638.63 |
| 619.11 | 12.9862  | 639.62 | 45.274 | 638.8  |
| 619.28 | 12.9777  | 639.79 | 45.272 | 638.97 |
| 619.45 | 12.9726  | 639.96 | 45.269 | 639.13 |
| 619.63 | 12.9692  | 640.13 | 45.264 | 639.3  |
| 619.8  | 12.9624  | 640.29 | 45.259 | 639.47 |
| 619.97 | 12.959   | 640.46 | 45.257 | 639.64 |
| 620.14 | 12.9539  | 640.63 | 45.252 | 639.81 |
| 620.31 | 12.9488  | 640.8  | 45.249 | 639.98 |
| 620.49 | 12.9454  | 640.97 | 45.244 | 640.15 |

|        |         |        |        |        |
|--------|---------|--------|--------|--------|
| 620.66 | 12.9403 | 641.14 | 45.239 | 640.32 |
| 620.83 | 12.9369 | 641.31 | 45.234 | 640.49 |
| 621    | 12.9301 | 641.48 | 45.232 | 640.66 |
| 621.17 | 12.925  | 641.65 | 45.227 | 640.83 |
| 621.34 | 12.9182 | 641.82 | 45.224 | 641    |
| 621.51 | 12.9131 | 641.99 | 45.222 | 641.17 |
| 621.68 | 12.9097 | 642.16 | 45.217 | 641.34 |
| 621.86 | 12.9029 | 642.33 | 45.214 | 641.51 |
| 622.03 | 12.8978 | 642.5  | 45.212 | 641.68 |
| 622.2  | 12.8944 | 642.67 | 45.209 | 641.85 |
| 622.37 | 12.8893 | 642.84 | 45.204 | 642.02 |
| 622.54 | 12.8842 | 643.01 | 45.202 | 642.19 |
| 622.71 | 12.8808 | 643.18 | 45.199 | 642.36 |
| 622.88 | 12.8757 | 643.35 | 45.197 | 642.53 |
| 623.05 | 12.8723 | 643.52 | 45.192 | 642.69 |
| 623.22 | 12.8672 | 643.69 | 45.187 | 642.86 |
| 623.4  | 12.8621 | 643.86 | 45.184 | 643.03 |
| 623.57 | 12.8553 | 644.03 | 45.179 | 643.2  |
| 623.74 | 12.8485 | 644.2  | 45.177 | 643.37 |
| 623.91 | 12.84   | 644.36 | 45.172 | 643.54 |
| 624.08 | 12.8332 | 644.53 | 45.17  | 643.71 |
| 624.25 | 12.8298 | 644.7  | 45.167 | 643.88 |
| 624.42 | 12.823  | 644.87 | 45.165 | 644.05 |
| 624.59 | 12.8179 | 645.04 | 45.16  | 644.22 |
| 624.76 | 12.8145 | 645.21 | 45.157 | 644.39 |
| 624.93 | 12.8111 | 645.38 | 45.152 | 644.56 |
| 625.1  | 12.8077 | 645.55 | 45.15  | 644.73 |
| 625.27 | 12.8026 | 645.72 | 45.147 | 644.9  |
| 625.44 | 12.7975 | 645.89 | 45.14  | 645.07 |
| 625.61 | 12.7924 | 646.06 | 45.135 | 645.24 |
| 625.78 | 12.789  | 646.23 | 45.132 | 645.41 |
| 625.96 | 12.7839 | 646.4  | 45.132 | 645.57 |
| 626.13 | 12.7805 | 646.57 | 45.127 | 645.74 |
| 626.3  | 12.7771 | 646.74 | 45.122 | 645.91 |
| 626.47 | 12.772  | 646.91 | 45.12  | 646.08 |
| 626.64 | 12.7669 | 647.08 | 45.117 | 646.25 |
| 626.81 | 12.7635 | 647.25 | 45.115 | 646.42 |
| 626.98 | 12.7567 | 647.42 | 45.11  | 646.59 |
| 627.15 | 12.7499 | 647.59 | 45.105 | 646.76 |
| 627.32 | 12.7448 | 647.76 | 45.102 | 646.93 |
| 627.49 | 12.738  | 647.93 | 45.097 | 647.1  |
| 627.66 | 12.7346 | 648.1  | 45.095 | 647.27 |
| 627.83 | 12.7329 | 648.27 | 45.09  | 647.44 |
| 628    | 12.7261 | 648.44 | 45.087 | 647.61 |
| 628.17 | 12.7227 | 648.6  | 45.082 | 647.78 |
| 628.34 | 12.7142 | 648.77 | 45.08  | 647.95 |
| 628.51 | 12.7091 | 648.94 | 45.077 | 648.12 |
| 628.68 | 12.704  | 649.11 | 45.072 | 648.29 |
| 628.85 | 12.6989 | 649.28 | 45.07  | 648.46 |
| 629.02 | 12.6938 | 649.45 | 45.065 | 648.63 |
| 629.19 | 12.6887 | 649.62 | 45.06  | 648.8  |
| 629.36 | 12.6853 | 649.79 | 45.057 | 648.97 |
| 629.54 | 12.6768 | 649.96 | 45.052 | 649.14 |
| 629.71 | 12.67   | 650.13 | 45.047 | 649.31 |

|        |         |        |        |        |
|--------|---------|--------|--------|--------|
| 629.88 | 12.6649 | 650.3  | 45.042 | 649.48 |
| 630.05 | 12.6615 | 650.47 | 45.04  | 649.65 |
| 630.22 | 12.6564 | 650.64 | 45.037 | 649.82 |
| 630.39 | 12.6513 | 650.81 | 45.035 | 649.99 |
| 630.56 | 12.6479 | 650.98 | 45.032 | 650.16 |
| 630.73 | 12.6411 | 651.15 | 45.027 | 650.33 |
| 630.9  | 12.636  | 651.32 | 45.025 | 650.5  |
| 631.07 | 12.6326 | 651.49 | 45.02  | 650.67 |
| 631.24 | 12.6292 | 651.66 | 45.017 | 650.84 |
| 631.41 | 12.6241 | 651.83 | 45.015 | 651.01 |
| 631.58 | 12.6207 | 652    | 45.01  | 651.18 |
| 631.75 | 12.6156 | 652.17 | 45.005 | 651.35 |
| 631.92 | 12.6088 | 652.34 | 45.002 | 651.52 |
| 632.09 | 12.6054 | 652.51 | 44.997 | 651.69 |
| 632.26 | 12.602  | 652.68 | 44.995 | 651.85 |
| 632.43 | 12.5969 | 652.85 | 44.99  | 652.02 |
| 632.6  | 12.5918 | 653.02 | 44.987 | 652.19 |
| 632.77 | 12.5867 | 653.19 | 44.982 | 652.36 |
| 632.94 | 12.5816 | 653.36 | 44.977 | 652.53 |
| 633.11 | 12.5765 | 653.53 | 44.975 | 652.7  |
| 633.28 | 12.5731 | 653.7  | 44.97  | 652.87 |
| 633.45 | 12.568  | 653.87 | 44.965 | 653.04 |
| 633.62 | 12.5612 | 654.04 | 44.96  | 653.21 |
| 633.79 | 12.5561 | 654.21 | 44.957 | 653.38 |
| 633.96 | 12.5527 | 654.38 | 44.952 | 653.55 |
| 634.13 | 12.5476 | 654.55 | 44.95  | 653.72 |
| 634.3  | 12.5442 | 654.72 | 44.945 | 653.89 |
| 634.47 | 12.5391 | 654.89 | 44.942 | 654.06 |
| 634.64 | 12.5357 | 655.06 | 44.937 | 654.23 |
| 634.81 | 12.5323 | 655.23 | 44.935 | 654.4  |
| 634.98 | 12.5272 | 655.4  | 44.932 | 654.57 |
| 635.15 | 12.5221 | 655.57 | 44.93  | 654.74 |
| 635.32 | 12.5204 | 655.74 | 44.925 | 654.91 |
| 635.49 | 12.5153 | 655.91 | 44.922 | 655.08 |
| 635.67 | 12.5119 | 656.08 | 44.917 | 655.25 |
| 635.84 | 12.5034 | 656.25 | 44.915 | 655.42 |
| 636.01 | 12.4966 | 656.42 | 44.91  | 655.59 |
| 636.18 | 12.4949 | 656.59 | 44.907 | 655.76 |
| 636.35 | 12.4898 | 656.76 | 44.905 | 655.93 |
| 636.52 | 12.483  | 656.93 | 44.9   | 656.1  |
| 636.69 | 12.4762 | 657.1  | 44.897 | 656.27 |
| 636.86 | 12.4677 | 657.27 | 44.892 | 656.44 |
| 637.03 | 12.4609 | 657.44 | 44.89  | 656.61 |
| 637.2  | 12.4558 | 657.61 | 44.887 | 656.78 |
| 637.37 | 12.4507 | 657.78 | 44.882 | 656.95 |
| 637.54 | 12.449  | 657.95 | 44.88  | 657.12 |
| 637.71 | 12.4422 | 658.12 | 44.877 | 657.29 |
| 637.88 | 12.4371 | 658.29 | 44.872 | 657.46 |
| 638.05 | 12.432  | 658.46 | 44.865 | 657.63 |
| 638.22 | 12.4286 | 658.62 | 44.86  | 657.8  |
| 638.39 | 12.4235 | 658.79 | 44.855 | 657.97 |
| 638.56 | 12.4218 | 658.96 | 44.852 | 658.14 |
| 638.73 | 12.415  | 659.13 | 44.847 | 658.31 |
| 638.9  | 12.4116 | 659.3  | 44.845 | 658.48 |

|         |          |         |         |         |
|---------|----------|---------|---------|---------|
| 639. 07 | 12. 4065 | 659. 47 | 44. 84  | 658. 65 |
| 639. 24 | 12. 4014 | 659. 64 | 44. 837 | 658. 82 |
| 639. 41 | 12. 398  | 659. 81 | 44. 832 | 658. 99 |
| 639. 58 | 12. 3929 | 659. 98 | 44. 83  | 659. 16 |
| 639. 75 | 12. 3878 | 660. 15 | 44. 825 | 659. 33 |
| 639. 92 | 12. 381  | 660. 32 | 44. 82  | 659. 5  |
| 640. 09 | 12. 3725 | 660. 49 | 44. 815 | 659. 67 |
| 640. 26 | 12. 3691 | 660. 66 | 44. 81  | 659. 84 |
| 640. 43 | 12. 364  | 660. 83 | 44. 808 | 660. 01 |
| 640. 61 | 12. 3606 | 661     | 44. 803 | 660. 18 |
| 640. 78 | 12. 3572 | 661. 17 | 44. 8   | 660. 35 |
| 640. 95 | 12. 3521 | 661. 34 | 44. 798 | 660. 52 |
| 641. 12 | 12. 347  | 661. 51 | 44. 793 | 660. 69 |
| 641. 29 | 12. 3436 | 661. 69 | 44. 79  | 660. 86 |
| 641. 46 | 12. 3402 | 661. 86 | 44. 788 | 661. 03 |
| 641. 63 | 12. 3351 | 662. 03 | 44. 785 | 661. 2  |
| 641. 8  | 12. 33   | 662. 2  | 44. 78  | 661. 37 |
| 641. 97 | 12. 3215 | 662. 37 | 44. 778 | 661. 54 |
| 642. 14 | 12. 3147 | 662. 54 | 44. 773 | 661. 71 |
| 642. 31 | 12. 3096 | 662. 71 | 44. 768 | 661. 88 |
| 642. 48 | 12. 3045 | 662. 88 | 44. 763 | 662. 05 |
| 642. 65 | 12. 3011 | 663. 05 | 44. 758 | 662. 22 |
| 642. 82 | 12. 2977 | 663. 22 | 44. 758 | 662. 39 |
| 642. 99 | 12. 2943 | 663. 39 | 44. 753 | 662. 56 |
| 643. 16 | 12. 2909 | 663. 56 | 44. 748 | 662. 73 |
| 643. 33 | 12. 2875 | 663. 73 | 44. 745 | 662. 9  |
| 643. 5  | 12. 279  | 663. 9  | 44. 743 | 663. 07 |
| 643. 67 | 12. 2739 | 664. 07 | 44. 738 | 663. 24 |
| 643. 84 | 12. 2671 | 664. 24 | 44. 733 | 663. 41 |
| 644. 01 | 12. 2586 | 664. 41 | 44. 723 | 663. 58 |
| 644. 18 | 12. 2518 | 664. 58 | 44. 718 | 663. 75 |
| 644. 35 | 12. 2484 | 664. 75 | 44. 715 | 663. 92 |
| 644. 52 | 12. 2433 | 664. 92 | 44. 71  | 664. 09 |
| 644. 69 | 12. 2399 | 665. 09 | 44. 708 | 664. 26 |
| 644. 86 | 12. 2348 | 665. 26 | 44. 703 | 664. 43 |
| 645. 04 | 12. 2297 | 665. 43 | 44. 7   | 664. 6  |
| 645. 21 | 12. 2263 | 665. 6  | 44. 698 | 664. 77 |
| 645. 38 | 12. 2178 | 665. 77 | 44. 695 | 664. 94 |
| 645. 55 | 12. 2144 | 665. 94 | 44. 69  | 665. 11 |
| 645. 72 | 12. 211  | 666. 11 | 44. 688 | 665. 28 |
| 645. 89 | 12. 2076 | 666. 28 | 44. 683 | 665. 45 |
| 646. 06 | 12. 2025 | 666. 45 | 44. 683 | 665. 62 |
| 646. 23 | 12. 1957 | 666. 62 | 44. 675 | 665. 79 |
| 646. 4  | 12. 1889 | 666. 79 | 44. 673 | 665. 96 |
| 646. 57 | 12. 1821 | 666. 96 | 44. 67  | 666. 13 |
| 646. 74 | 12. 177  | 667. 13 | 44. 665 | 666. 3  |
| 646. 91 | 12. 1736 | 667. 3  | 44. 66  | 666. 47 |
| 647. 08 | 12. 1702 | 667. 47 | 44. 658 | 666. 64 |
| 647. 25 | 12. 1651 | 667. 64 | 44. 653 | 666. 81 |
| 647. 42 | 12. 1617 | 667. 81 | 44. 65  | 666. 98 |
| 647. 59 | 12. 1566 | 667. 98 | 44. 65  | 667. 15 |
| 647. 76 | 12. 1515 | 668. 15 | 44. 648 | 667. 32 |
| 647. 93 | 12. 1498 | 668. 32 | 44. 645 | 667. 49 |
| 648. 1  | 12. 143  | 668. 49 | 44. 64  | 667. 66 |

|         |           |         |         |         |
|---------|-----------|---------|---------|---------|
| 648. 27 | 12. 1362  | 668. 66 | 44. 638 | 667. 84 |
| 648. 44 | 12. 1294  | 668. 83 | 44. 633 | 668. 01 |
| 648. 61 | 12. 1243  | 669     | 44. 63  | 668. 18 |
| 648. 78 | 12. 1175  | 669. 17 | 44. 623 | 668. 35 |
| 648. 95 | 12. 1107  | 669. 34 | 44. 62  | 668. 52 |
| 649. 12 | 12. 109   | 669. 51 | 44. 613 | 668. 69 |
| 649. 29 | 12. 1022  | 669. 68 | 44. 605 | 668. 86 |
| 649. 47 | 12. 0988  | 669. 85 | 44. 603 | 669. 03 |
| 649. 64 | 12. 092   | 670. 02 | 44. 598 | 669. 2  |
| 649. 81 | 12. 0869  | 670. 19 | 44. 595 | 669. 37 |
| 649. 98 | 12. 0818  | 670. 36 | 44. 593 | 669. 54 |
| 650. 15 | 12. 0767  | 670. 53 | 44. 588 | 669. 71 |
| 650. 32 | 12. 0716  | 670. 7  | 44. 585 | 669. 88 |
| 650. 49 | 12. 0665  | 670. 87 | 44. 583 | 670. 05 |
| 650. 66 | 12. 0614  | 671. 04 | 44. 578 | 670. 22 |
| 650. 83 | 12. 0563  | 671. 21 | 44. 575 | 670. 39 |
| 651     | 12. 0529  | 671. 38 | 44. 573 | 670. 56 |
| 651. 17 | 12. 0461  | 671. 56 | 44. 568 | 670. 73 |
| 651. 34 | 12. 0427  | 671. 73 | 44. 565 | 670. 9  |
| 651. 52 | 12. 0393  | 671. 9  | 44. 56  | 671. 07 |
| 651. 69 | 12. 0308  | 672. 07 | 44. 555 | 671. 24 |
| 651. 86 | 12. 0223  | 672. 24 | 44. 553 | 671. 41 |
| 652. 03 | 12. 0172  | 672. 41 | 44. 548 | 671. 58 |
| 652. 2  | 12. 0121  | 672. 58 | 44. 543 | 671. 75 |
| 652. 37 | 12. 0053  | 672. 75 | 44. 538 | 671. 92 |
| 652. 54 | 11. 9985  | 672. 92 | 44. 535 | 672. 09 |
| 652. 71 | 11. 9917  | 673. 09 | 44. 53  | 672. 26 |
| 652. 88 | 11. 9866  | 673. 26 | 44. 528 | 672. 43 |
| 653. 05 | 11. 9815  | 673. 43 | 44. 523 | 672. 6  |
| 653. 22 | 11. 9781  | 673. 6  | 44. 52  | 672. 77 |
| 653. 39 | 11. 973   | 673. 77 | 44. 515 | 672. 94 |
| 653. 57 | 11. 9679  | 673. 94 | 44. 513 | 673. 11 |
| 653. 74 | 11. 9628  | 674. 11 | 44. 508 | 673. 28 |
| 653. 91 | 11. 9594  | 674. 28 | 44. 505 | 673. 45 |
| 654. 08 | 11. 9526  | 674. 45 | 44. 5   | 673. 62 |
| 654. 25 | 11. 9475  | 674. 62 | 44. 495 | 673. 79 |
| 654. 42 | 11. 9407  | 674. 79 | 44. 493 | 673. 96 |
| 654. 59 | 11. 9373  | 674. 96 | 44. 49  | 674. 13 |
| 654. 76 | 11. 9305  | 675. 13 | 44. 485 | 674. 3  |
| 654. 93 | 11. 9254  | 675. 31 | 44. 481 | 674. 47 |
| 655. 1  | 11. 9203  | 675. 48 | 44. 478 | 674. 64 |
| 655. 27 | 11. 9169  | 675. 65 | 44. 476 | 674. 81 |
| 655. 45 | 11. 9135  | 675. 82 | 44. 471 | 674. 98 |
| 655. 62 | 11. 9067  | 675. 99 | 44. 466 | 675. 16 |
| 655. 79 | 11. 9016  | 676. 16 | 44. 463 | 675. 33 |
| 655. 96 | 11. 8965  | 676. 33 | 44. 461 | 675. 5  |
| 656. 13 | 11. 8897  | 676. 5  | 44. 456 | 675. 67 |
| 656. 3  | 11. 8846  | 676. 67 | 44. 453 | 675. 84 |
| 656. 47 | 11. 8778  | 676. 84 | 44. 448 | 676. 01 |
| 656. 64 | 11. 87101 | 677. 01 | 44. 446 | 676. 18 |
| 656. 81 | 11. 86761 | 677. 18 | 44. 441 | 676. 35 |
| 656. 98 | 11. 86081 | 677. 35 | 44. 438 | 676. 52 |
| 657. 15 | 11. 85571 | 677. 52 | 44. 433 | 676. 69 |
| 657. 32 | 11. 85061 | 677. 69 | 44. 426 | 676. 86 |

|         |           |         |         |         |
|---------|-----------|---------|---------|---------|
| 657. 5  | 11. 84381 | 677. 86 | 44. 423 | 677. 03 |
| 657. 67 | 11. 84041 | 678. 03 | 44. 418 | 677. 2  |
| 657. 84 | 11. 83531 | 678. 2  | 44. 411 | 677. 37 |
| 658. 01 | 11. 83021 | 678. 37 | 44. 406 | 677. 54 |
| 658. 18 | 11. 82341 | 678. 54 | 44. 401 | 677. 71 |
| 658. 35 | 11. 82001 | 678. 71 | 44. 398 | 677. 88 |
| 658. 52 | 11. 81321 | 678. 88 | 44. 396 | 678. 05 |
| 658. 69 | 11. 80641 | 679. 05 | 44. 391 | 678. 22 |
| 658. 86 | 11. 79961 | 679. 22 | 44. 388 | 678. 39 |
| 659. 03 | 11. 79281 | 679. 39 | 44. 383 | 678. 56 |
| 659. 2  | 11. 78771 | 679. 56 | 44. 381 | 678. 73 |
| 659. 38 | 11. 78431 | 679. 73 | 44. 376 | 678. 9  |
| 659. 55 | 11. 77921 | 679. 9  | 44. 368 | 679. 07 |
| 659. 72 | 11. 77241 | 680. 07 | 44. 366 | 679. 24 |
| 659. 89 | 11. 76391 | 680. 25 | 44. 363 | 679. 41 |
| 660. 06 | 11. 75711 | 680. 42 | 44. 361 | 679. 59 |
| 660. 23 | 11. 75371 | 680. 59 | 44. 356 | 679. 76 |
| 660. 4  | 11. 74861 | 680. 76 | 44. 351 | 679. 93 |
| 660. 57 | 11. 74521 | 680. 93 | 44. 346 | 680. 1  |
| 660. 74 | 11. 73671 | 681. 1  | 44. 346 | 680. 27 |
| 660. 91 | 11. 73161 | 681. 27 | 44. 341 | 680. 44 |
| 661. 08 | 11. 72651 | 681. 44 | 44. 336 | 680. 61 |
| 661. 26 | 11. 71971 | 681. 61 | 44. 333 | 680. 78 |
| 661. 43 | 11. 71461 | 681. 78 | 44. 326 | 680. 95 |
| 661. 6  | 11. 71121 | 681. 95 | 44. 326 | 681. 12 |
| 661. 77 | 11. 70441 | 682. 12 | 44. 323 | 681. 29 |
| 661. 94 | 11. 69761 | 682. 29 | 44. 318 | 681. 46 |
| 662. 11 | 11. 69251 | 682. 46 | 44. 313 | 681. 63 |
| 662. 28 | 11. 68401 | 682. 63 | 44. 311 | 681. 8  |
| 662. 45 | 11. 67891 | 682. 8  | 44. 306 | 681. 97 |
| 662. 62 | 11. 67041 | 682. 98 | 44. 301 | 682. 14 |
| 662. 79 | 11. 66701 | 683. 15 | 44. 293 | 682. 31 |
| 662. 97 | 11. 66531 | 683. 32 | 44. 286 | 682. 48 |
| 663. 14 | 11. 65851 | 683. 49 | 44. 283 | 682. 65 |
| 663. 31 | 11. 65341 | 683. 66 | 44. 278 | 682. 82 |
| 663. 48 | 11. 64661 | 683. 83 | 44. 276 | 682. 99 |
| 663. 65 | 11. 64151 | 684     | 44. 273 | 683. 17 |
| 663. 82 | 11. 63471 | 684. 17 | 44. 271 | 683. 34 |
| 663. 99 | 11. 63131 | 684. 34 | 44. 268 | 683. 51 |
| 664. 16 | 11. 62791 | 684. 51 | 44. 263 | 683. 68 |
| 664. 33 | 11. 61941 | 684. 68 | 44. 258 | 683. 85 |
| 664. 51 | 11. 61261 | 684. 85 | 44. 253 | 684. 02 |
| 664. 68 | 11. 60581 | 685. 02 | 44. 251 | 684. 19 |
| 664. 85 | 11. 60071 | 685. 19 | 44. 246 | 684. 36 |
| 665. 02 | 11. 59391 | 685. 36 | 44. 241 | 684. 53 |
| 665. 19 | 11. 58711 | 685. 53 | 44. 241 | 684. 7  |
| 665. 36 | 11. 58201 | 685. 71 | 44. 233 | 684. 87 |
| 665. 53 | 11. 57521 | 685. 88 | 44. 231 | 685. 04 |
| 665. 7  | 11. 56841 | 686. 05 | 44. 226 | 685. 21 |
| 665. 87 | 11. 56331 | 686. 22 | 44. 223 | 685. 38 |
| 666. 05 | 11. 55821 | 686. 39 | 44. 218 | 685. 55 |
| 666. 22 | 11. 55141 | 686. 56 | 44. 213 | 685. 72 |
| 666. 39 | 11. 54631 | 686. 73 | 44. 208 | 685. 89 |
| 666. 56 | 11. 54121 | 686. 9  | 44. 206 | 686. 07 |

|         |           |         |         |         |
|---------|-----------|---------|---------|---------|
| 666. 73 | 11. 53611 | 687. 07 | 44. 201 | 686. 24 |
| 666. 9  | 11. 52931 | 687. 24 | 44. 198 | 686. 41 |
| 667. 07 | 11. 51911 | 687. 41 | 44. 193 | 686. 58 |
| 667. 24 | 11. 51231 | 687. 58 | 44. 188 | 686. 75 |
| 667. 42 | 11. 50551 | 687. 75 | 44. 183 | 686. 92 |
| 667. 59 | 11. 49701 | 687. 92 | 44. 178 | 687. 09 |
| 667. 76 | 11. 48851 | 688. 1  | 44. 176 | 687. 26 |
| 667. 93 | 11. 48341 | 688. 27 | 44. 173 | 687. 43 |
| 668. 1  | 11. 47831 | 688. 44 | 44. 168 | 687. 6  |
| 668. 27 | 11. 47491 | 688. 61 | 44. 163 | 687. 77 |
| 668. 44 | 11. 46981 | 688. 78 | 44. 161 | 687. 94 |
| 668. 62 | 11. 46471 | 688. 95 | 44. 158 | 688. 11 |
| 668. 79 | 11. 45451 | 689. 12 | 44. 153 | 688. 28 |
| 668. 96 | 11. 44941 | 689. 29 | 44. 148 | 688. 46 |
| 669. 13 | 11. 44091 | 689. 46 | 44. 143 | 688. 63 |
| 669. 3  | 11. 43751 | 689. 63 | 44. 136 | 688. 8  |
| 669. 47 | 11. 42901 | 689. 8  | 44. 131 | 688. 97 |
| 669. 64 | 11. 42391 | 689. 97 | 44. 129 | 689. 14 |
| 669. 81 | 11. 41711 | 690. 14 | 44. 124 | 689. 31 |
| 669. 99 | 11. 41371 | 690. 31 | 44. 121 | 689. 48 |
| 670. 16 | 11. 40861 | 690. 48 | 44. 119 | 689. 65 |
| 670. 33 | 11. 40181 | 690. 65 | 44. 114 | 689. 82 |
| 670. 5  | 11. 39671 | 690. 82 | 44. 111 | 689. 99 |
| 670. 67 | 11. 38651 | 690. 99 | 44. 104 | 690. 16 |
| 670. 84 | 11. 38311 | 691. 16 | 44. 099 | 690. 34 |
| 671. 01 | 11. 37801 | 691. 33 | 44. 096 | 690. 51 |
| 671. 18 | 11. 37461 | 691. 51 | 44. 089 | 690. 68 |
| 671. 36 | 11. 36781 | 691. 68 | 44. 086 | 690. 85 |
| 671. 53 | 11. 36101 | 691. 85 | 44. 081 | 691. 02 |
| 671. 7  | 11. 35421 | 692. 02 | 44. 079 | 691. 19 |
| 671. 87 | 11. 34911 | 692. 19 | 44. 074 | 691. 36 |
| 672. 04 | 11. 34571 | 692. 36 | 44. 071 | 691. 53 |
| 672. 21 | 11. 34061 | 692. 53 | 44. 066 | 691. 7  |
| 672. 38 | 11. 33211 | 692. 7  | 44. 064 | 691. 87 |
| 672. 55 | 11. 32871 | 692. 87 | 44. 059 | 692. 05 |
| 672. 72 | 11. 32191 | 693. 04 | 44. 056 | 692. 22 |
| 672. 9  | 11. 31681 | 693. 22 | 44. 051 | 692. 39 |
| 673. 07 | 11. 31171 | 693. 39 | 44. 046 | 692. 56 |
| 673. 24 | 11. 30491 | 693. 56 | 44. 041 | 692. 73 |
| 673. 41 | 11. 29811 | 693. 73 | 44. 036 | 692. 9  |
| 673. 58 | 11. 29301 | 693. 9  | 44. 034 | 693. 07 |
| 673. 75 | 11. 28281 | 694. 07 | 44. 029 | 693. 24 |
| 673. 92 | 11. 27601 | 694. 24 | 44. 021 | 693. 41 |
| 674. 1  | 11. 26921 | 694. 41 | 44. 021 | 693. 58 |
| 674. 27 | 11. 26411 | 694. 58 | 44. 011 | 693. 75 |
| 674. 44 | 11. 26071 | 694. 75 | 44. 009 | 693. 93 |
| 674. 61 | 11. 25221 | 694. 92 | 44. 004 | 694. 1  |
| 674. 78 | 11. 24881 | 695. 09 | 43. 999 | 694. 27 |
| 674. 95 | 11. 24031 | 695. 26 | 43. 994 | 694. 44 |
| 675. 12 | 11. 23861 | 695. 44 | 43. 991 | 694. 61 |
| 675. 3  | 11. 23181 | 695. 61 | 43. 989 | 694. 78 |
| 675. 47 | 11. 22841 | 695. 78 | 43. 984 | 694. 95 |
| 675. 64 | 11. 21821 | 695. 95 | 43. 981 | 695. 12 |
| 675. 81 | 11. 21141 | 696. 12 | 43. 974 | 695. 29 |



|        |          |        |        |        |
|--------|----------|--------|--------|--------|
| 675.98 | 11.20291 | 696.29 | 43.966 | 695.47 |
| 676.15 | 11.19781 | 696.46 | 43.959 | 695.64 |
| 676.32 | 11.19441 | 696.63 | 43.954 | 695.81 |
| 676.5  | 11.18931 | 696.8  | 43.951 | 695.98 |
| 676.67 | 11.18251 | 696.97 | 43.949 | 696.15 |
| 676.84 | 11.17741 | 697.15 | 43.946 | 696.32 |
| 677.01 | 11.17061 | 697.32 | 43.941 | 696.49 |
| 677.18 | 11.16551 | 697.49 | 43.939 | 696.66 |
| 677.35 | 11.16041 | 697.66 | 43.939 | 696.83 |
| 677.53 | 11.15361 | 697.83 | 43.934 | 697.01 |
| 677.7  | 11.14851 | 698    | 43.929 | 697.18 |
| 677.87 | 11.14001 | 698.17 | 43.924 | 697.35 |
| 678.04 | 11.13321 | 698.34 | 43.919 | 697.52 |
| 678.21 | 11.12811 | 698.51 | 43.911 | 697.69 |
| 678.38 | 11.12131 | --     | --     |        |
| 678.55 | 11.11621 |        |        |        |
| 678.73 | 11.11111 |        |        |        |
| 678.9  | 11.10261 |        |        |        |
| 679.07 | 11.09581 |        |        |        |
| 679.24 | 11.09071 |        |        |        |
| 679.41 | 11.08391 |        |        |        |
| 679.58 | 11.07881 |        |        |        |
| 679.75 | 11.06861 |        |        |        |
| 679.93 | 11.06181 |        |        |        |
| 680.1  | 11.05501 |        |        |        |
| 680.27 | 11.04821 |        |        |        |
| 680.44 | 11.04481 |        |        |        |
| 680.61 | 11.04141 |        |        |        |
| 680.78 | 11.03631 |        |        |        |
| 680.96 | 11.02781 |        |        |        |
| 681.13 | 11.02101 |        |        |        |
| 681.3  | 11.01251 |        |        |        |
| 681.47 | 11.00741 |        |        |        |
| 681.64 | 10.99891 |        |        |        |
| 681.81 | 10.99381 |        |        |        |
| 681.98 | 10.98531 |        |        |        |
| 682.15 | 10.98361 |        |        |        |
| 682.33 | 10.97681 |        |        |        |
| 682.5  | 10.97171 |        |        |        |
| 682.67 | 10.96831 |        |        |        |
| 682.84 | 10.96321 |        |        |        |
| 683.01 | 10.95641 |        |        |        |
| 683.18 | 10.94791 |        |        |        |
| 683.35 | 10.94111 |        |        |        |
| 683.53 | 10.93771 |        |        |        |
| 683.7  | 10.93431 |        |        |        |
| 683.87 | 10.92581 |        |        |        |
| 684.04 | 10.91731 |        |        |        |
| 684.21 | 10.90881 |        |        |        |
| 684.38 | 10.90371 |        |        |        |
| 684.56 | 10.89861 |        |        |        |
| 684.73 | 10.89351 |        |        |        |
| 684.9  | 10.88331 |        |        |        |
| 685.07 | 10.87651 |        |        |        |

|        |          |
|--------|----------|
| 685.24 | 10.86801 |
| 685.42 | 10.86291 |
| 685.59 | 10.85611 |
| 685.76 | 10.85101 |
| 685.93 | 10.84761 |
| 686.1  | 10.84421 |
| 686.28 | 10.84081 |
| 686.45 | 10.83571 |
| 686.62 | 10.82721 |
| 686.79 | 10.81701 |
| 686.96 | 10.81361 |
| 687.13 | 10.80681 |
| 687.3  | 10.80001 |
| 687.48 | 10.79151 |
| 687.65 | 10.78641 |
| 687.82 | 10.77961 |
| 687.99 | 10.77451 |
| 688.16 | 10.76771 |
| 688.33 | 10.76261 |
| 688.5  | 10.75581 |
| 688.67 | 10.75071 |
| 688.85 | 10.74391 |
| 689.02 | 10.73711 |
| 689.19 | 10.72861 |
| 689.36 | 10.72351 |
| 689.53 | 10.71501 |
| 689.7  | 10.71161 |
| 689.88 | 10.70481 |
| 690.05 | 10.69971 |
| 690.22 | 10.69461 |
| 690.39 | 10.68951 |
| 690.56 | 10.68271 |
| 690.73 | 10.66911 |
| 690.9  | 10.65891 |
| 691.08 | 10.65211 |
| 691.25 | 10.64701 |
| 691.42 | 10.64361 |
| 691.59 | 10.63681 |
| 691.76 | 10.63001 |
| 691.93 | 10.62322 |
| 692.1  | 10.61472 |
| 692.28 | 10.60792 |
| 692.45 | 10.60112 |
| 692.62 | 10.59432 |
| 692.79 | 10.58412 |
| 692.96 | 10.57562 |
| 693.13 | 10.57052 |
| 693.31 | 10.56542 |
| 693.48 | 10.56032 |
| 693.65 | 10.55522 |
| 693.82 | 10.55012 |
| 693.99 | 10.54332 |
| 694.16 | 10.53652 |
| 694.33 | 10.53142 |

|        |          |
|--------|----------|
| 694.51 | 10.52802 |
| 694.68 | 10.51952 |
| 694.85 | 10.50932 |
| 695.02 | 10.50082 |
| 695.19 | 10.49742 |
| 695.36 | 10.49232 |
| 695.53 | 10.48552 |
| 695.71 | 10.47702 |
| 695.88 | 10.46852 |
| 696.05 | 10.46512 |
| 696.22 | 10.45662 |
| 696.39 | 10.44642 |
| 696.56 | 10.43792 |
| 696.74 | 10.43112 |
| 696.91 | 10.42772 |
| 697.08 | 10.42092 |
| 697.25 | 10.41412 |
| 697.42 | 10.40732 |
| 697.59 | 10.40052 |
| 697.77 | 10.39372 |
| 697.94 | 10.38352 |
| 698.11 | 10.37672 |
| 698.28 | 10.36992 |
| 698.45 | 10.36652 |
| 698.62 | 10.36142 |
| 698.79 | 10.35292 |

10

Residual Weight

Temperature

15

Residual Weight

Temperature

|        |       |        |       |
|--------|-------|--------|-------|
| 99.915 | 49.56 | 99.469 | 30.2  |
| 99.913 | 49.57 | 99.466 | 30.2  |
| 99.91  | 49.57 | 99.464 | 30.2  |
| 99.907 | 49.58 | 99.457 | 30.2  |
| 99.901 | 49.59 | 99.444 | 30.2  |
| 99.899 | 49.6  | 99.432 | 30.2  |
| 99.893 | 49.6  | 99.424 | 30.2  |
| 99.89  | 49.61 | 99.41  | 30.2  |
| 99.884 | 49.62 | 99.405 | 30.2  |
| 99.882 | 49.62 | 99.402 | 30.2  |
| 99.879 | 49.63 | 99.397 | 30.2  |
| 99.876 | 49.64 | 99.392 | 30.2  |
| 99.873 | 49.65 | 99.39  | 30.2  |
| 99.87  | 49.66 | 99.387 | 30.21 |
| 99.868 | 49.67 | 99.382 | 30.21 |
| 99.865 | 49.68 | 99.378 | 30.22 |
| 99.865 | 49.7  | 99.375 | 30.23 |
| 99.865 | 49.72 | 99.37  | 30.24 |
| 99.862 | 49.74 | 99.365 | 30.25 |
| 99.859 | 49.76 | 99.36  | 30.27 |
| 99.856 | 49.79 | 99.355 | 30.28 |
| 99.856 | 49.81 | 99.353 | 30.31 |
| 99.853 | 49.84 | 99.345 | 30.33 |
| 99.851 | 49.88 | 99.34  | 30.36 |
| 99.851 | 49.91 | 99.333 | 30.39 |
| 99.845 | 49.95 | 99.331 | 30.42 |
| 99.842 | 49.99 | 99.326 | 30.45 |
| 99.837 | 50.04 | 99.321 | 30.49 |
| 99.834 | 50.08 | 99.313 | 30.53 |
| 99.831 | 50.13 | 99.308 | 30.57 |
| 99.828 | 50.18 | 99.303 | 30.61 |
| 99.825 | 50.23 | 99.296 | 30.66 |
| 99.82  | 50.29 | 99.291 | 30.7  |
| 99.817 | 50.34 | 99.284 | 30.75 |
| 99.814 | 50.4  | 99.279 | 30.8  |
| 99.811 | 50.46 | 99.271 | 30.85 |
| 99.808 | 50.52 | 99.269 | 30.91 |
| 99.803 | 50.58 | 99.259 | 30.96 |
| 99.8   | 50.64 | 99.256 | 31.02 |
| 99.797 | 50.71 | 99.249 | 31.08 |
| 99.794 | 50.78 | 99.244 | 31.14 |
| 99.791 | 50.84 | 99.237 | 31.2  |
| 99.786 | 50.91 | 99.234 | 31.26 |
| 99.783 | 50.99 | 99.227 | 31.33 |
| 99.78  | 51.06 | 99.224 | 31.4  |
| 99.774 | 51.13 | 99.219 | 31.46 |
| 99.772 | 51.21 | 99.217 | 31.53 |
| 99.766 | 51.28 | 99.212 | 31.6  |
| 99.76  | 51.36 | 99.207 | 31.67 |
| 99.755 | 51.44 | 99.2   | 31.75 |
| 99.749 | 51.52 | 99.192 | 31.82 |
| 99.741 | 51.6  | 99.185 | 31.9  |

|        |       |        |       |
|--------|-------|--------|-------|
| 99.738 | 51.69 | 99.182 | 31.97 |
| 99.729 | 51.77 | 99.175 | 32.05 |
| 99.729 | 51.86 | 99.172 | 32.13 |
| 99.721 | 51.94 | 99.165 | 32.21 |
| 99.718 | 52.03 | 99.158 | 32.29 |
| 99.712 | 52.12 | 99.155 | 32.37 |
| 99.707 | 52.21 | 99.145 | 32.46 |
| 99.704 | 52.3  | 99.138 | 32.54 |
| 99.698 | 52.39 | 99.13  | 32.63 |
| 99.696 | 52.49 | 99.123 | 32.71 |
| 99.69  | 52.58 | 99.116 | 32.8  |
| 99.687 | 52.68 | 99.111 | 32.89 |
| 99.684 | 52.78 | 99.108 | 32.98 |
| 99.679 | 52.87 | 99.101 | 33.07 |
| 99.673 | 52.97 | 99.096 | 33.17 |
| 99.667 | 53.07 | 99.093 | 33.26 |
| 99.662 | 53.18 | 99.086 | 33.35 |
| 99.653 | 53.28 | 99.079 | 33.45 |
| 99.648 | 53.38 | 99.074 | 33.55 |
| 99.639 | 53.49 | 99.066 | 33.64 |
| 99.636 | 53.59 | 99.061 | 33.74 |
| 99.631 | 53.7  | 99.056 | 33.84 |
| 99.628 | 53.8  | 99.049 | 33.94 |
| 99.622 | 53.91 | 99.042 | 34.04 |
| 99.619 | 54.02 | 99.037 | 34.15 |
| 99.614 | 54.13 | 99.029 | 34.25 |
| 99.608 | 54.24 | 99.022 | 34.35 |
| 99.603 | 54.35 | 99.014 | 34.46 |
| 99.594 | 54.47 | 99.009 | 34.56 |
| 99.586 | 54.58 | 99.002 | 34.67 |
| 99.58  | 54.69 | 98.995 | 34.78 |
| 99.574 | 54.81 | 98.987 | 34.89 |
| 99.572 | 54.92 | 98.982 | 34.99 |
| 99.566 | 55.04 | 98.975 | 35.1  |
| 99.557 | 55.16 | 98.97  | 35.21 |
| 99.552 | 55.27 | 98.96  | 35.33 |
| 99.546 | 55.39 | 98.953 | 35.44 |
| 99.543 | 55.51 | 98.945 | 35.55 |
| 99.532 | 55.63 | 98.94  | 35.66 |
| 99.524 | 55.75 | 98.933 | 35.78 |
| 99.518 | 55.88 | 98.928 | 35.89 |
| 99.515 | 56    | 98.921 | 36.01 |
| 99.51  | 56.12 | 98.913 | 36.12 |
| 99.504 | 56.25 | 98.903 | 36.24 |
| 99.501 | 56.37 | 98.896 | 36.36 |
| 99.495 | 56.5  | 98.888 | 36.48 |
| 99.49  | 56.62 | 98.879 | 36.6  |
| 99.484 | 56.75 | 98.871 | 36.71 |
| 99.479 | 56.88 | 98.864 | 36.83 |
| 99.476 | 57    | 98.856 | 36.96 |
| 99.462 | 57.13 | 98.851 | 37.08 |
| 99.456 | 57.26 | 98.841 | 37.2  |
| 99.45  | 57.39 | 98.837 | 37.32 |
| 99.442 | 57.52 | 98.832 | 37.44 |

|        |       |        |       |
|--------|-------|--------|-------|
| 99.439 | 57.65 | 98.824 | 37.57 |
| 99.433 | 57.78 | 98.819 | 37.69 |
| 99.422 | 57.92 | 98.812 | 37.82 |
| 99.414 | 58.05 | 98.804 | 37.94 |
| 99.408 | 58.18 | 98.799 | 38.07 |
| 99.4   | 58.31 | 98.79  | 38.2  |
| 99.394 | 58.45 | 98.782 | 38.32 |
| 99.386 | 58.58 | 98.77  | 38.45 |
| 99.374 | 58.72 | 98.76  | 38.58 |
| 99.366 | 58.85 | 98.748 | 38.71 |
| 99.36  | 58.99 | 98.735 | 38.84 |
| 99.349 | 59.13 | 98.728 | 38.96 |
| 99.34  | 59.26 | 98.72  | 39.09 |
| 99.332 | 59.4  | 98.713 | 39.23 |
| 99.326 | 59.54 | 98.703 | 39.36 |
| 99.321 | 59.68 | 98.701 | 39.49 |
| 99.312 | 59.82 | 98.696 | 39.62 |
| 99.307 | 59.96 | 98.691 | 39.75 |
| 99.298 | 60.1  | 98.681 | 39.88 |
| 99.29  | 60.24 | 98.671 | 40.02 |
| 99.278 | 60.38 | 98.659 | 40.15 |
| 99.264 | 60.52 | 98.646 | 40.29 |
| 99.259 | 60.66 | 98.636 | 40.42 |
| 99.25  | 60.8  | 98.629 | 40.56 |
| 99.242 | 60.95 | 98.622 | 40.69 |
| 99.236 | 61.09 | 98.612 | 40.83 |
| 99.225 | 61.23 | 98.607 | 40.96 |
| 99.219 | 61.38 | 98.599 | 41.1  |
| 99.211 | 61.52 | 98.59  | 41.24 |
| 99.205 | 61.66 | 98.58  | 41.38 |
| 99.199 | 61.81 | 98.567 | 41.52 |
| 99.183 | 61.95 | 98.555 | 41.66 |
| 99.171 | 62.1  | 98.545 | 41.8  |
| 99.166 | 62.25 | 98.538 | 41.94 |
| 99.157 | 62.39 | 98.53  | 42.08 |
| 99.146 | 62.54 | 98.52  | 42.22 |
| 99.14  | 62.69 | 98.51  | 42.36 |
| 99.132 | 62.83 | 98.501 | 42.5  |
| 99.118 | 62.98 | 98.491 | 42.64 |
| 99.106 | 63.13 | 98.481 | 42.79 |
| 99.095 | 63.28 | 98.468 | 42.93 |
| 99.09  | 63.43 | 98.461 | 43.07 |
| 99.078 | 63.57 | 98.451 | 43.22 |
| 99.067 | 63.72 | 98.441 | 43.36 |
| 99.053 | 63.87 | 98.434 | 43.51 |
| 99.044 | 64.02 | 98.424 | 43.65 |
| 99.036 | 64.17 | 98.417 | 43.8  |
| 99.033 | 64.32 | 98.407 | 43.95 |
| 99.025 | 64.47 | 98.399 | 44.09 |
| 99.011 | 64.63 | 98.392 | 44.24 |
| 99.002 | 64.78 | 98.382 | 44.38 |
| 98.985 | 64.93 | 98.372 | 44.53 |
| 98.977 | 65.08 | 98.36  | 44.68 |
| 98.963 | 65.23 | 98.35  | 44.83 |

|        |       |        |       |
|--------|-------|--------|-------|
| 98.954 | 65.38 | 98.343 | 44.98 |
| 98.949 | 65.54 | 98.335 | 45.12 |
| 98.94  | 65.69 | 98.318 | 45.27 |
| 98.926 | 65.84 | 98.308 | 45.42 |
| 98.912 | 66    | 98.298 | 45.57 |
| 98.901 | 66.15 | 98.291 | 45.72 |
| 98.892 | 66.3  | 98.278 | 45.87 |
| 98.878 | 66.46 | 98.268 | 46.02 |
| 98.87  | 66.61 | 98.259 | 46.17 |
| 98.861 | 66.77 | 98.246 | 46.32 |
| 98.847 | 66.92 | 98.241 | 46.48 |
| 98.839 | 67.08 | 98.229 | 46.63 |
| 98.83  | 67.23 | 98.219 | 46.78 |
| 98.822 | 67.39 | 98.204 | 46.93 |
| 98.808 | 67.54 | 98.194 | 47.08 |
| 98.794 | 67.7  | 98.184 | 47.24 |
| 98.782 | 67.85 | 98.177 | 47.39 |
| 98.777 | 68.01 | 98.167 | 47.54 |
| 98.768 | 68.17 | 98.157 | 47.7  |
| 98.76  | 68.32 | 98.147 | 47.85 |
| 98.746 | 68.48 | 98.142 | 48    |
| 98.737 | 68.64 | 98.135 | 48.16 |
| 98.732 | 68.79 | 98.125 | 48.31 |
| 98.715 | 68.95 | 98.11  | 48.47 |
| 98.706 | 69.11 | 98.098 | 48.62 |
| 98.686 | 69.27 | 98.091 | 48.78 |
| 98.672 | 69.42 | 98.081 | 48.93 |
| 98.667 | 69.58 | 98.071 | 49.09 |
| 98.653 | 69.74 | 98.061 | 49.24 |
| 98.641 | 69.9  | 98.046 | 49.4  |
| 98.627 | 70.06 | 98.039 | 49.56 |
| 98.616 | 70.22 | 98.029 | 49.71 |
| 98.61  | 70.37 | 98.019 | 49.87 |
| 98.602 | 70.53 | 98.009 | 50.02 |
| 98.591 | 70.69 | 97.997 | 50.18 |
| 98.579 | 70.85 | 97.989 | 50.34 |
| 98.562 | 71.01 | 97.982 | 50.5  |
| 98.548 | 71.17 | 97.965 | 50.65 |
| 98.537 | 71.33 | 97.955 | 50.81 |
| 98.526 | 71.49 | 97.942 | 50.97 |
| 98.514 | 71.65 | 97.937 | 51.13 |
| 98.503 | 71.81 | 97.928 | 51.28 |
| 98.492 | 71.97 | 97.915 | 51.44 |
| 98.475 | 72.13 | 97.9   | 51.6  |
| 98.461 | 72.29 | 97.888 | 51.76 |
| 98.45  | 72.45 | 97.876 | 51.92 |
| 98.433 | 72.61 | 97.868 | 52.08 |
| 98.416 | 72.78 | 97.856 | 52.24 |
| 98.405 | 72.94 | 97.846 | 52.4  |
| 98.393 | 73.1  | 97.836 | 52.56 |
| 98.385 | 73.26 | 97.821 | 52.72 |
| 98.374 | 73.42 | 97.814 | 52.87 |
| 98.359 | 73.58 | 97.806 | 53.03 |
| 98.348 | 73.74 | 97.802 | 53.19 |

|        |       |        |       |
|--------|-------|--------|-------|
| 98.34  | 73.91 | 97.787 | 53.35 |
| 98.326 | 74.07 | 97.769 | 53.52 |
| 98.309 | 74.23 | 97.762 | 53.68 |
| 98.295 | 74.39 | 97.75  | 53.84 |
| 98.281 | 74.55 | 97.74  | 54    |
| 98.269 | 74.72 | 97.732 | 54.16 |
| 98.255 | 74.88 | 97.723 | 54.32 |
| 98.25  | 75.04 | 97.715 | 54.48 |
| 98.235 | 75.2  | 97.7   | 54.64 |
| 98.224 | 75.37 | 97.685 | 54.8  |
| 98.216 | 75.53 | 97.678 | 54.96 |
| 98.199 | 75.69 | 97.666 | 55.13 |
| 98.188 | 75.85 | 97.656 | 55.29 |
| 98.171 | 76.02 | 97.643 | 55.45 |
| 98.162 | 76.18 | 97.631 | 55.61 |
| 98.159 | 76.34 | 97.621 | 55.77 |
| 98.145 | 76.51 | 97.611 | 55.94 |
| 98.128 | 76.67 | 97.599 | 56.1  |
| 98.109 | 76.84 | 97.592 | 56.26 |
| 98.097 | 77    | 97.579 | 56.42 |
| 98.089 | 77.16 | 97.572 | 56.59 |
| 98.075 | 77.33 | 97.559 | 56.75 |
| 98.066 | 77.49 | 97.55  | 56.91 |
| 98.049 | 77.65 | 97.535 | 57.07 |
| 98.03  | 77.82 | 97.522 | 57.24 |
| 98.021 | 77.98 | 97.513 | 57.4  |
| 98.01  | 78.15 | 97.503 | 57.56 |
| 97.993 | 78.31 | 97.493 | 57.73 |
| 97.979 | 78.48 | 97.483 | 57.89 |
| 97.968 | 78.64 | 97.471 | 58.05 |
| 97.956 | 78.8  | 97.461 | 58.22 |
| 97.945 | 78.97 | 97.446 | 58.38 |
| 97.931 | 79.13 | 97.433 | 58.54 |
| 97.917 | 79.3  | 97.429 | 58.71 |
| 97.906 | 79.46 | 97.421 | 58.87 |
| 97.897 | 79.63 | 97.414 | 59.04 |
| 97.88  | 79.79 | 97.401 | 59.2  |
| 97.866 | 79.96 | 97.389 | 59.36 |
| 97.855 | 80.12 | 97.379 | 59.53 |
| 97.841 | 80.29 | 97.364 | 59.69 |
| 97.838 | 80.45 | 97.359 | 59.86 |
| 97.824 | 80.62 | 97.347 | 60.02 |
| 97.813 | 80.78 | 97.335 | 60.19 |
| 97.796 | 80.95 | 97.325 | 60.35 |
| 97.782 | 81.11 | 97.315 | 60.51 |
| 97.776 | 81.28 | 97.308 | 60.68 |
| 97.762 | 81.44 | 97.295 | 60.84 |
| 97.748 | 81.61 | 97.285 | 61.01 |
| 97.736 | 81.78 | 97.273 | 61.17 |
| 97.725 | 81.94 | 97.258 | 61.34 |
| 97.7   | 82.11 | 97.253 | 61.5  |
| 97.691 | 82.27 | 97.243 | 61.67 |
| 97.68  | 82.44 | 97.231 | 61.83 |
| 97.669 | 82.6  | 97.221 | 62    |



|        |       |        |       |
|--------|-------|--------|-------|
| 97.652 | 82.77 | 97.209 | 62.16 |
| 97.646 | 82.93 | 97.199 | 62.33 |
| 97.638 | 83.1  | 97.189 | 62.49 |
| 97.627 | 83.27 | 97.174 | 62.66 |
| 97.61  | 83.43 | 97.169 | 62.82 |
| 97.596 | 83.6  | 97.159 | 62.99 |
| 97.579 | 83.76 | 97.149 | 63.16 |
| 97.565 | 83.93 | 97.137 | 63.32 |
| 97.55  | 84.1  | 97.127 | 63.49 |
| 97.536 | 84.26 | 97.12  | 63.65 |
| 97.528 | 84.43 | 97.11  | 63.82 |
| 97.514 | 84.59 | 97.095 | 63.98 |
| 97.508 | 84.76 | 97.078 | 64.15 |
| 97.491 | 84.93 | 97.068 | 64.31 |
| 97.48  | 85.09 | 97.06  | 64.48 |
| 97.463 | 85.26 | 97.051 | 64.65 |
| 97.452 | 85.43 | 97.046 | 64.81 |
| 97.441 | 85.59 | 97.033 | 64.98 |
| 97.432 | 85.76 | 97.023 | 65.14 |
| 97.412 | 85.93 | 97.006 | 65.31 |
| 97.398 | 86.09 | 97.001 | 65.48 |
| 97.384 | 86.26 | 96.994 | 65.64 |
| 97.37  | 86.43 | 96.984 | 65.81 |
| 97.364 | 86.59 | 96.969 | 65.97 |
| 97.35  | 86.76 | 96.962 | 66.14 |
| 97.331 | 86.93 | 96.952 | 66.31 |
| 97.319 | 87.09 | 96.944 | 66.47 |
| 97.305 | 87.26 | 96.932 | 66.64 |
| 97.3   | 87.43 | 96.92  | 66.81 |
| 97.291 | 87.59 | 96.912 | 66.97 |
| 97.274 | 87.76 | 96.9   | 67.14 |
| 97.26  | 87.93 | 96.89  | 67.31 |
| 97.249 | 88.09 | 96.88  | 67.47 |
| 97.235 | 88.26 | 96.868 | 67.64 |
| 97.221 | 88.43 | 96.86  | 67.81 |
| 97.209 | 88.59 | 96.853 | 67.97 |
| 97.198 | 88.76 | 96.846 | 68.14 |
| 97.187 | 88.93 | 96.838 | 68.3  |
| 97.173 | 89.09 | 96.823 | 68.47 |
| 97.167 | 89.26 | 96.813 | 68.64 |
| 97.153 | 89.43 | 96.804 | 68.8  |
| 97.145 | 89.6  | 96.794 | 68.97 |
| 97.13  | 89.76 | 96.786 | 69.14 |
| 97.116 | 89.93 | 96.776 | 69.31 |
| 97.099 | 90.1  | 96.762 | 69.47 |
| 97.091 | 90.26 | 96.749 | 69.64 |
| 97.074 | 90.43 | 96.737 | 69.81 |
| 97.063 | 90.6  | 96.732 | 69.97 |
| 97.054 | 90.77 | 96.725 | 70.14 |
| 97.043 | 90.93 | 96.715 | 70.31 |
| 97.029 | 91.1  | 96.702 | 70.47 |
| 97.018 | 91.27 | 96.695 | 70.64 |
| 97.006 | 91.43 | 96.685 | 70.81 |
| 96.992 | 91.6  | 96.675 | 70.97 |

|        |        |        |       |
|--------|--------|--------|-------|
| 96.987 | 91.77  | 96.66  | 71.14 |
| 96.97  | 91.94  | 96.653 | 71.31 |
| 96.959 | 92.1   | 96.646 | 71.47 |
| 96.947 | 92.27  | 96.638 | 71.64 |
| 96.944 | 92.44  | 96.626 | 71.81 |
| 96.93  | 92.61  | 96.613 | 71.98 |
| 96.916 | 92.77  | 96.601 | 72.14 |
| 96.908 | 92.94  | 96.599 | 72.31 |
| 96.896 | 93.11  | 96.589 | 72.48 |
| 96.888 | 93.27  | 96.579 | 72.64 |
| 96.877 | 93.44  | 96.569 | 72.81 |
| 96.86  | 93.61  | 96.557 | 72.98 |
| 96.851 | 93.78  | 96.552 | 73.15 |
| 96.843 | 93.94  | 96.542 | 73.31 |
| 96.834 | 94.11  | 96.534 | 73.48 |
| 96.823 | 94.28  | 96.522 | 73.65 |
| 96.809 | 94.45  | 96.512 | 73.81 |
| 96.798 | 94.61  | 96.502 | 73.98 |
| 96.784 | 94.78  | 96.497 | 74.15 |
| 96.778 | 94.95  | 96.487 | 74.32 |
| 96.77  | 95.12  | 96.475 | 74.48 |
| 96.761 | 95.28  | 96.458 | 74.65 |
| 96.744 | 95.45  | 96.448 | 74.82 |
| 96.733 | 95.62  | 96.44  | 74.99 |
| 96.725 | 95.79  | 96.433 | 75.15 |
| 96.705 | 95.95  | 96.423 | 75.32 |
| 96.691 | 96.12  | 96.413 | 75.49 |
| 96.677 | 96.29  | 96.403 | 75.66 |
| 96.668 | 96.46  | 96.394 | 75.82 |
| 96.663 | 96.62  | 96.384 | 75.99 |
| 96.66  | 96.79  | 96.376 | 76.16 |
| 96.651 | 96.96  | 96.371 | 76.32 |
| 96.64  | 97.13  | 96.364 | 76.49 |
| 96.623 | 97.29  | 96.356 | 76.66 |
| 96.612 | 97.46  | 96.347 | 76.83 |
| 96.598 | 97.63  | 96.337 | 76.99 |
| 96.592 | 97.8   | 96.329 | 77.16 |
| 96.578 | 97.96  | 96.319 | 77.33 |
| 96.575 | 98.13  | 96.315 | 77.5  |
| 96.567 | 98.3   | 96.305 | 77.66 |
| 96.558 | 98.47  | 96.295 | 77.83 |
| 96.544 | 98.63  | 96.28  | 78    |
| 96.533 | 98.8   | 96.27  | 78.17 |
| 96.524 | 98.97  | 96.263 | 78.33 |
| 96.516 | 99.14  | 96.258 | 78.5  |
| 96.507 | 99.3   | 96.248 | 78.67 |
| 96.493 | 99.47  | 96.24  | 78.84 |
| 96.479 | 99.64  | 96.231 | 79    |
| 96.474 | 99.81  | 96.226 | 79.17 |
| 96.462 | 99.97  | 96.213 | 79.34 |
| 96.454 | 100.14 | 96.208 | 79.5  |
| 96.443 | 100.31 | 96.201 | 79.67 |
| 96.434 | 100.48 | 96.191 | 79.84 |
| 96.42  | 100.65 | 96.184 | 80.01 |

|        |        |        |       |
|--------|--------|--------|-------|
| 96.412 | 100.81 | 96.176 | 80.17 |
| 96.395 | 100.98 | 96.166 | 80.34 |
| 96.386 | 101.15 | 96.159 | 80.51 |
| 96.378 | 101.32 | 96.156 | 80.68 |
| 96.369 | 101.48 | 96.144 | 80.84 |
| 96.361 | 101.65 | 96.139 | 81.01 |
| 96.355 | 101.82 | 96.129 | 81.18 |
| 96.347 | 101.99 | 96.122 | 81.35 |
| 96.333 | 102.15 | 96.114 | 81.51 |
| 96.321 | 102.32 | 96.1   | 81.68 |
| 96.31  | 102.49 | 96.092 | 81.85 |
| 96.302 | 102.66 | 96.085 | 82.02 |
| 96.293 | 102.82 | 96.077 | 82.18 |
| 96.285 | 102.99 | 96.07  | 82.35 |
| 96.276 | 103.16 | 96.063 | 82.52 |
| 96.262 | 103.33 | 96.053 | 82.69 |
| 96.254 | 103.5  | 96.045 | 82.85 |
| 96.243 | 103.66 | 96.038 | 83.02 |
| 96.234 | 103.83 | 96.035 | 83.19 |
| 96.231 | 104    | 96.028 | 83.36 |
| 96.22  | 104.17 | 96.018 | 83.52 |
| 96.217 | 104.33 | 96.013 | 83.69 |
| 96.212 | 104.5  | 96.008 | 83.86 |
| 96.203 | 104.67 | 95.998 | 84.03 |
| 96.192 | 104.84 | 95.988 | 84.19 |
| 96.181 | 105    | 95.979 | 84.36 |
| 96.166 | 105.17 | 95.971 | 84.53 |
| 96.158 | 105.34 | 95.964 | 84.69 |
| 96.147 | 105.51 | 95.956 | 84.86 |
| 96.138 | 105.67 | 95.951 | 85.03 |
| 96.135 | 105.84 | 95.942 | 85.2  |
| 96.133 | 106.01 | 95.932 | 85.36 |
| 96.119 | 106.18 | 95.924 | 85.53 |
| 96.107 | 106.34 | 95.919 | 85.7  |
| 96.099 | 106.51 | 95.912 | 85.87 |
| 96.087 | 106.68 | 95.904 | 86.03 |
| 96.082 | 106.85 | 95.897 | 86.2  |
| 96.073 | 107.02 | 95.887 | 86.37 |
| 96.062 | 107.18 | 95.88  | 86.54 |
| 96.059 | 107.35 | 95.872 | 86.7  |
| 96.048 | 107.52 | 95.865 | 86.87 |
| 96.04  | 107.69 | 95.853 | 87.04 |
| 96.037 | 107.85 | 95.845 | 87.21 |
| 96.028 | 108.02 | 95.84  | 87.37 |
| 96.017 | 108.19 | 95.833 | 87.54 |
| 96.011 | 108.36 | 95.825 | 87.71 |
| 96     | 108.52 | 95.818 | 87.88 |
| 95.992 | 108.69 | 95.813 | 88.04 |
| 95.98  | 108.86 | 95.806 | 88.21 |
| 95.978 | 109.03 | 95.801 | 88.38 |
| 95.969 | 109.19 | 95.788 | 88.54 |
| 95.963 | 109.36 | 95.781 | 88.71 |
| 95.955 | 109.53 | 95.778 | 88.88 |
| 95.949 | 109.7  | 95.771 | 89.05 |

|        |        |        |       |
|--------|--------|--------|-------|
| 95.944 | 109.86 | 95.764 | 89.21 |
| 95.935 | 110.03 | 95.759 | 89.38 |
| 95.93  | 110.2  | 95.751 | 89.55 |
| 95.921 | 110.37 | 95.744 | 89.72 |
| 95.91  | 110.53 | 95.736 | 89.88 |
| 95.907 | 110.7  | 95.732 | 90.05 |
| 95.896 | 110.87 | 95.724 | 90.22 |
| 95.89  | 111.04 | 95.717 | 90.39 |
| 95.885 | 111.2  | 95.712 | 90.55 |
| 95.876 | 111.37 | 95.704 | 90.72 |
| 95.87  | 111.54 | 95.699 | 90.89 |
| 95.862 | 111.71 | 95.69  | 91.05 |
| 95.856 | 111.87 | 95.68  | 91.22 |
| 95.848 | 112.04 | 95.675 | 91.39 |
| 95.837 | 112.21 | 95.667 | 91.56 |
| 95.828 | 112.38 | 95.66  | 91.72 |
| 95.82  | 112.54 | 95.655 | 91.89 |
| 95.811 | 112.71 | 95.652 | 92.06 |
| 95.803 | 112.88 | 95.645 | 92.23 |
| 95.797 | 113.05 | 95.638 | 92.39 |
| 95.792 | 113.21 | 95.633 | 92.56 |
| 95.783 | 113.38 | 95.62  | 92.73 |
| 95.78  | 113.55 | 95.611 | 92.89 |
| 95.772 | 113.72 | 95.603 | 93.06 |
| 95.763 | 113.88 | 95.598 | 93.23 |
| 95.758 | 114.05 | 95.596 | 93.4  |
| 95.752 | 114.22 | 95.588 | 93.56 |
| 95.749 | 114.39 | 95.583 | 93.73 |
| 95.744 | 114.55 | 95.578 | 93.9  |
| 95.735 | 114.72 | 95.571 | 94.06 |
| 95.727 | 114.89 | 95.566 | 94.23 |
| 95.721 | 115.06 | 95.559 | 94.4  |
| 95.715 | 115.22 | 95.554 | 94.57 |
| 95.71  | 115.39 | 95.546 | 94.73 |
| 95.704 | 115.56 | 95.539 | 94.9  |
| 95.696 | 115.72 | 95.531 | 95.07 |
| 95.69  | 115.89 | 95.527 | 95.23 |
| 95.684 | 116.06 | 95.522 | 95.4  |
| 95.676 | 116.23 | 95.517 | 95.57 |
| 95.673 | 116.39 | 95.512 | 95.74 |
| 95.665 | 116.56 | 95.504 | 95.9  |
| 95.656 | 116.73 | 95.497 | 96.07 |
| 95.651 | 116.9  | 95.487 | 96.24 |
| 95.645 | 117.06 | 95.48  | 96.4  |
| 95.639 | 117.23 | 95.475 | 96.57 |
| 95.634 | 117.4  | 95.47  | 96.74 |
| 95.628 | 117.56 | 95.465 | 96.91 |
| 95.622 | 117.73 | 95.46  | 97.07 |
| 95.617 | 117.9  | 95.457 | 97.24 |
| 95.611 | 118.07 | 95.45  | 97.41 |
| 95.605 | 118.23 | 95.445 | 97.57 |
| 95.594 | 118.4  | 95.44  | 97.74 |
| 95.589 | 118.57 | 95.435 | 97.91 |
| 95.583 | 118.74 | 95.43  | 98.08 |

|        |        |        |        |
|--------|--------|--------|--------|
| 95.577 | 118.9  | 95.423 | 98.24  |
| 95.572 | 119.07 | 95.42  | 98.41  |
| 95.566 | 119.24 | 95.415 | 98.58  |
| 95.56  | 119.4  | 95.413 | 98.74  |
| 95.558 | 119.57 | 95.408 | 98.91  |
| 95.552 | 119.74 | 95.401 | 99.08  |
| 95.546 | 119.91 | 95.398 | 99.24  |
| 95.541 | 120.07 | 95.391 | 99.41  |
| 95.538 | 120.24 | 95.383 | 99.58  |
| 95.535 | 120.41 | 95.376 | 99.75  |
| 95.529 | 120.58 | 95.371 | 99.91  |
| 95.524 | 120.74 | 95.363 | 100.08 |
| 95.515 | 120.91 | 95.356 | 100.25 |
| 95.51  | 121.08 | 95.351 | 100.41 |
| 95.507 | 121.24 | 95.344 | 100.58 |
| 95.498 | 121.41 | 95.336 | 100.75 |
| 95.496 | 121.58 | 95.331 | 100.91 |
| 95.487 | 121.75 | 95.324 | 101.08 |
| 95.479 | 121.91 | 95.319 | 101.25 |
| 95.473 | 122.08 | 95.314 | 101.42 |
| 95.467 | 122.25 | 95.309 | 101.58 |
| 95.459 | 122.41 | 95.304 | 101.75 |
| 95.453 | 122.58 | 95.299 | 101.92 |
| 95.45  | 122.75 | 95.297 | 102.08 |
| 95.448 | 122.92 | 95.292 | 102.25 |
| 95.448 | 123.08 | 95.289 | 102.42 |
| 95.442 | 123.25 | 95.284 | 102.58 |
| 95.439 | 123.42 | 95.277 | 102.75 |
| 95.436 | 123.58 | 95.27  | 102.92 |
| 95.431 | 123.75 | 95.265 | 103.08 |
| 95.425 | 123.92 | 95.257 | 103.25 |
| 95.419 | 124.08 | 95.252 | 103.42 |
| 95.414 | 124.25 | 95.247 | 103.58 |
| 95.408 | 124.42 | 95.242 | 103.75 |
| 95.403 | 124.58 | 95.235 | 103.92 |
| 95.4   | 124.75 | 95.233 | 104.08 |
| 95.394 | 124.92 | 95.228 | 104.25 |
| 95.391 | 125.09 | 95.22  | 104.42 |
| 95.388 | 125.25 | 95.215 | 104.58 |
| 95.383 | 125.42 | 95.21  | 104.75 |
| 95.38  | 125.59 | 95.208 | 104.92 |
| 95.377 | 125.75 | 95.203 | 105.09 |
| 95.372 | 125.92 | 95.196 | 105.25 |
| 95.366 | 126.09 | 95.193 | 105.42 |
| 95.36  | 126.25 | 95.191 | 105.59 |
| 95.357 | 126.42 | 95.183 | 105.75 |
| 95.352 | 126.59 | 95.178 | 105.92 |
| 95.346 | 126.76 | 95.173 | 106.09 |
| 95.341 | 126.92 | 95.171 | 106.25 |
| 95.338 | 127.09 | 95.163 | 106.42 |
| 95.332 | 127.26 | 95.158 | 106.59 |
| 95.326 | 127.42 | 95.151 | 106.75 |
| 95.318 | 127.59 | 95.146 | 106.92 |
| 95.31  | 127.76 | 95.139 | 107.09 |

|        |        |        |        |
|--------|--------|--------|--------|
| 95.307 | 127.92 | 95.134 | 107.25 |
| 95.301 | 128.09 | 95.129 | 107.42 |
| 95.298 | 128.26 | 95.126 | 107.59 |
| 95.293 | 128.42 | 95.121 | 107.75 |
| 95.287 | 128.59 | 95.119 | 107.92 |
| 95.284 | 128.76 | 95.114 | 108.09 |
| 95.281 | 128.92 | 95.109 | 108.25 |
| 95.276 | 129.09 | 95.104 | 108.42 |
| 95.273 | 129.26 | 95.102 | 108.59 |
| 95.27  | 129.42 | 95.097 | 108.75 |
| 95.264 | 129.59 | 95.092 | 108.92 |
| 95.262 | 129.76 | 95.087 | 109.09 |
| 95.256 | 129.92 | 95.084 | 109.25 |
| 95.25  | 130.09 | 95.079 | 109.42 |
| 95.245 | 130.26 | 95.072 | 109.59 |
| 95.239 | 130.42 | 95.072 | 109.75 |
| 95.233 | 130.59 | 95.065 | 109.92 |
| 95.228 | 130.76 | 95.057 | 110.09 |
| 95.222 | 130.92 | 95.052 | 110.25 |
| 95.219 | 131.09 | 95.047 | 110.42 |
| 95.211 | 131.25 | 95.04  | 110.59 |
| 95.208 | 131.42 | 95.035 | 110.75 |
| 95.202 | 131.59 | 95.032 | 110.92 |
| 95.197 | 131.75 | 95.028 | 111.09 |
| 95.194 | 131.92 | 95.023 | 111.25 |
| 95.191 | 132.09 | 95.018 | 111.42 |
| 95.185 | 132.25 | 95.015 | 111.59 |
| 95.183 | 132.42 | 95.013 | 111.75 |
| 95.18  | 132.59 | 95.005 | 111.92 |
| 95.174 | 132.75 | 95     | 112.09 |
| 95.171 | 132.92 | 94.998 | 112.25 |
| 95.169 | 133.09 | 94.99  | 112.42 |
| 95.166 | 133.25 | 94.986 | 112.58 |
| 95.16  | 133.42 | 94.978 | 112.75 |
| 95.157 | 133.59 | 94.973 | 112.92 |
| 95.152 | 133.75 | 94.971 | 113.08 |
| 95.149 | 133.92 | 94.963 | 113.25 |
| 95.143 | 134.08 | 94.958 | 113.42 |
| 95.14  | 134.25 | 94.953 | 113.58 |
| 95.138 | 134.42 | 94.946 | 113.75 |
| 95.135 | 134.58 | 94.941 | 113.92 |
| 95.129 | 134.75 | 94.934 | 114.08 |
| 95.126 | 134.92 | 94.929 | 114.25 |
| 95.121 | 135.08 | 94.924 | 114.42 |
| 95.118 | 135.25 | 94.919 | 114.58 |
| 95.109 | 135.42 | 94.914 | 114.75 |
| 95.101 | 135.58 | 94.907 | 114.91 |
| 95.092 | 135.74 | 94.904 | 115.08 |
| 95.084 | 135.9  | 94.897 | 115.25 |
| 95.078 | 136.06 | 94.889 | 115.41 |
| 95.076 | 136.22 | 94.884 | 115.58 |
| 95.076 | 136.38 | 94.882 | 115.75 |
| 95.07  | 136.54 | 94.877 | 115.91 |
| 95.067 | 136.7  | 94.869 | 116.08 |

|        |        |        |        |
|--------|--------|--------|--------|
| 95.064 | 136.87 | 94.867 | 116.25 |
| 95.061 | 137.04 | 94.862 | 116.41 |
| 95.059 | 137.21 | 94.857 | 116.58 |
| 95.056 | 137.38 | 94.847 | 116.74 |
| 95.053 | 137.55 | 94.842 | 116.91 |
| 95.047 | 137.72 | 94.837 | 117.08 |
| 95.039 | 137.89 | 94.832 | 117.24 |
| 95.036 | 138.06 | 94.827 | 117.41 |
| 95.03  | 138.23 | 94.823 | 117.58 |
| 95.028 | 138.4  | 94.818 | 117.74 |
| 95.022 | 138.57 | 94.81  | 117.91 |
| 95.019 | 138.73 | 94.805 | 118.07 |
| 95.014 | 138.9  | 94.798 | 118.24 |
| 95.011 | 139.07 | 94.793 | 118.41 |
| 95.005 | 139.23 | 94.785 | 118.57 |
| 95.002 | 139.4  | 94.781 | 118.74 |
| 94.999 | 139.57 | 94.778 | 118.91 |
| 94.994 | 139.73 | 94.771 | 119.07 |
| 94.988 | 139.9  | 94.766 | 119.24 |
| 94.985 | 140.07 | 94.761 | 119.4  |
| 94.983 | 140.24 | 94.753 | 119.57 |
| 94.98  | 140.41 | 94.751 | 119.74 |
| 94.974 | 140.57 | 94.746 | 119.9  |
| 94.968 | 140.74 | 94.741 | 120.07 |
| 94.966 | 140.91 | 94.736 | 120.23 |
| 94.96  | 141.08 | 94.731 | 120.4  |
| 94.957 | 141.25 | 94.729 | 120.57 |
| 94.952 | 141.41 | 94.724 | 120.73 |
| 94.949 | 141.58 | 94.716 | 120.9  |
| 94.943 | 141.75 | 94.714 | 121.06 |
| 94.94  | 141.92 | 94.706 | 121.23 |
| 94.935 | 142.09 | 94.701 | 121.4  |
| 94.932 | 142.25 | 94.697 | 121.56 |
| 94.929 | 142.42 | 94.692 | 121.73 |
| 94.926 | 142.59 | 94.687 | 121.9  |
| 94.923 | 142.76 | 94.679 | 122.06 |
| 94.918 | 142.93 | 94.677 | 122.23 |
| 94.912 | 143.1  | 94.672 | 122.39 |
| 94.909 | 143.27 | 94.667 | 122.56 |
| 94.906 | 143.44 | 94.662 | 122.73 |
| 94.904 | 143.6  | 94.657 | 122.89 |
| 94.901 | 143.77 | 94.647 | 123.06 |
| 94.898 | 143.94 | 94.64  | 123.22 |
| 94.892 | 144.11 | 94.635 | 123.39 |
| 94.89  | 144.28 | 94.63  | 123.56 |
| 94.887 | 144.45 | 94.625 | 123.72 |
| 94.884 | 144.62 | 94.62  | 123.89 |
| 94.881 | 144.79 | 94.615 | 124.05 |
| 94.878 | 144.96 | 94.61  | 124.22 |
| 94.873 | 145.13 | 94.603 | 124.39 |
| 94.87  | 145.29 | 94.595 | 124.55 |
| 94.867 | 145.46 | 94.59  | 124.72 |
| 94.861 | 145.63 | 94.585 | 124.88 |
| 94.858 | 145.8  | 94.58  | 125.05 |

|        |        |        |        |
|--------|--------|--------|--------|
| 94.856 | 145.97 | 94.578 | 125.22 |
| 94.85  | 146.14 | 94.573 | 125.38 |
| 94.847 | 146.31 | 94.571 | 125.55 |
| 94.844 | 146.48 | 94.563 | 125.71 |
| 94.839 | 146.65 | 94.558 | 125.88 |
| 94.836 | 146.82 | 94.556 | 126.04 |
| 94.833 | 146.99 | 94.548 | 126.21 |
| 94.83  | 147.16 | 94.543 | 126.38 |
| 94.827 | 147.33 | 94.536 | 126.54 |
| 94.825 | 147.49 | 94.529 | 126.71 |
| 94.819 | 147.66 | 94.524 | 126.87 |
| 94.816 | 147.83 | 94.519 | 127.04 |
| 94.811 | 148    | 94.509 | 127.21 |
| 94.808 | 148.17 | 94.506 | 127.37 |
| 94.802 | 148.34 | 94.504 | 127.54 |
| 94.799 | 148.51 | 94.499 | 127.7  |
| 94.796 | 148.68 | 94.494 | 127.87 |
| 94.794 | 148.85 | 94.489 | 128.03 |
| 94.788 | 149.02 | 94.487 | 128.2  |
| 94.785 | 149.19 | 94.482 | 128.37 |
| 94.782 | 149.36 | 94.477 | 128.53 |
| 94.782 | 149.53 | 94.474 | 128.7  |
| 94.777 | 149.7  | 94.472 | 128.86 |
| 94.774 | 149.87 | 94.467 | 129.03 |
| 94.771 | 150.04 | 94.462 | 129.19 |
| 94.768 | 150.21 | 94.459 | 129.36 |
| 94.765 | 150.38 | 94.454 | 129.53 |
| 94.763 | 150.54 | 94.45  | 129.69 |
| 94.76  | 150.71 | 94.445 | 129.86 |
| 94.757 | 150.88 | 94.44  | 130.02 |
| 94.754 | 151.05 | 94.435 | 130.19 |
| 94.751 | 151.22 | 94.43  | 130.36 |
| 94.749 | 151.39 | 94.427 | 130.52 |
| 94.746 | 151.56 | 94.42  | 130.69 |
| 94.743 | 151.73 | 94.417 | 130.85 |
| 94.74  | 151.9  | 94.412 | 131.02 |
| 94.74  | 152.07 | 94.408 | 131.18 |
| 94.737 | 152.24 | 94.403 | 131.35 |
| 94.734 | 152.41 | 94.4   | 131.52 |
| 94.732 | 152.58 | 94.395 | 131.68 |
| 94.726 | 152.75 | 94.39  | 131.85 |
| 94.723 | 152.92 | 94.385 | 132.01 |
| 94.718 | 153.09 | 94.38  | 132.18 |
| 94.718 | 153.26 | 94.378 | 132.34 |
| 94.715 | 153.43 | 94.373 | 132.51 |
| 94.712 | 153.6  | 94.368 | 132.68 |
| 94.706 | 153.77 | 94.363 | 132.84 |
| 94.703 | 153.94 | 94.358 | 133.01 |
| 94.701 | 154.1  | 94.353 | 133.17 |
| 94.698 | 154.27 | 94.351 | 133.34 |
| 94.695 | 154.44 | 94.346 | 133.5  |
| 94.692 | 154.61 | 94.343 | 133.67 |
| 94.689 | 154.78 | 94.338 | 133.83 |
| 94.689 | 154.95 | 94.333 | 134    |



|        |        |        |        |
|--------|--------|--------|--------|
| 94.687 | 155.12 | 94.331 | 134.17 |
| 94.684 | 155.29 | 94.326 | 134.33 |
| 94.681 | 155.46 | 94.321 | 134.5  |
| 94.675 | 155.63 | 94.314 | 134.66 |
| 94.675 | 155.8  | 94.311 | 134.83 |
| 94.672 | 155.97 | 94.309 | 134.99 |
| 94.67  | 156.14 | 94.304 | 135.16 |
| 94.667 | 156.31 | 94.301 | 135.33 |
| 94.664 | 156.48 | 94.296 | 135.49 |
| 94.661 | 156.65 | 94.294 | 135.65 |
| 94.661 | 156.82 | 94.289 | 135.81 |
| 94.658 | 156.99 | 94.286 | 135.97 |
| 94.656 | 157.16 | 94.282 | 136.13 |
| 94.653 | 157.33 | 94.274 | 136.28 |
| 94.65  | 157.5  | 94.272 | 136.44 |
| 94.65  | 157.67 | 94.269 | 136.61 |
| 94.647 | 157.84 | 94.264 | 136.77 |
| 94.644 | 158    | 94.259 | 136.94 |
| 94.641 | 158.17 | 94.254 | 137.11 |
| 94.639 | 158.34 | 94.252 | 137.28 |
| 94.636 | 158.51 | 94.247 | 137.45 |
| 94.633 | 158.68 | 94.242 | 137.62 |
| 94.63  | 158.85 | 94.237 | 137.79 |
| 94.627 | 159.02 | 94.235 | 137.96 |
| 94.625 | 159.19 | 94.23  | 138.13 |
| 94.625 | 159.36 | 94.227 | 138.3  |
| 94.622 | 159.53 | 94.225 | 138.46 |
| 94.619 | 159.7  | 94.22  | 138.63 |
| 94.616 | 159.87 | 94.217 | 138.79 |
| 94.613 | 160.04 | 94.212 | 138.96 |
| 94.61  | 160.21 | 94.21  | 139.13 |
| 94.608 | 160.38 | 94.207 | 139.29 |
| 94.608 | 160.55 | 94.203 | 139.46 |
| 94.605 | 160.72 | 94.2   | 139.63 |
| 94.602 | 160.89 | 94.195 | 139.79 |
| 94.599 | 161.06 | 94.193 | 139.96 |
| 94.596 | 161.23 | 94.19  | 140.13 |
| 94.596 | 161.4  | 94.185 | 140.3  |
| 94.594 | 161.56 | 94.183 | 140.46 |
| 94.591 | 161.73 | 94.178 | 140.63 |
| 94.588 | 161.9  | 94.175 | 140.8  |
| 94.588 | 162.07 | 94.17  | 140.96 |
| 94.585 | 162.24 | 94.168 | 141.13 |
| 94.582 | 162.41 | 94.165 | 141.3  |
| 94.579 | 162.58 | 94.158 | 141.46 |
| 94.579 | 162.75 | 94.156 | 141.63 |
| 94.577 | 162.92 | 94.153 | 141.8  |
| 94.574 | 163.09 | 94.148 | 141.97 |
| 94.574 | 163.26 | 94.146 | 142.14 |
| 94.571 | 163.43 | 94.143 | 142.3  |
| 94.571 | 163.6  | 94.138 | 142.47 |
| 94.568 | 163.77 | 94.136 | 142.64 |
| 94.565 | 163.94 | 94.131 | 142.81 |
| 94.565 | 164.11 | 94.126 | 142.97 |

|         |         |         |         |
|---------|---------|---------|---------|
| 94. 563 | 164. 28 | 94. 123 | 143. 14 |
| 94. 563 | 164. 45 | 94. 119 | 143. 31 |
| 94. 563 | 164. 62 | 94. 116 | 143. 48 |
| 94. 56  | 164. 79 | 94. 114 | 143. 65 |
| 94. 557 | 164. 96 | 94. 111 | 143. 81 |
| 94. 557 | 165. 13 | 94. 106 | 143. 98 |
| 94. 554 | 165. 3  | 94. 101 | 144. 15 |
| 94. 554 | 165. 46 | 94. 099 | 144. 32 |
| 94. 551 | 165. 63 | 94. 096 | 144. 49 |
| 94. 548 | 165. 8  | 94. 091 | 144. 65 |
| 94. 548 | 165. 97 | 94. 084 | 144. 82 |
| 94. 543 | 166. 14 | 94. 079 | 144. 99 |
| 94. 54  | 166. 31 | 94. 074 | 145. 16 |
| 94. 537 | 166. 48 | 94. 074 | 145. 33 |
| 94. 537 | 166. 65 | 94. 069 | 145. 49 |
| 94. 534 | 166. 82 | 94. 067 | 145. 66 |
| 94. 532 | 166. 99 | 94. 064 | 145. 83 |
| 94. 529 | 167. 16 | 94. 062 | 146     |
| 94. 526 | 167. 33 | 94. 057 | 146. 17 |
| 94. 526 | 167. 5  | 94. 054 | 146. 34 |
| 94. 523 | 167. 67 | 94. 052 | 146. 5  |
| 94. 52  | 167. 84 | 94. 049 | 146. 67 |
| 94. 517 | 168. 01 | 94. 044 | 146. 84 |
| 94. 517 | 168. 18 | 94. 044 | 147. 01 |
| 94. 517 | 168. 35 | 94. 044 | 147. 18 |
| 94. 515 | 168. 52 | 94. 042 | 147. 35 |
| 94. 515 | 168. 69 | 94. 039 | 147. 51 |
| 94. 512 | 168. 86 | 94. 035 | 147. 68 |
| 94. 512 | 169. 02 | 94. 035 | 147. 85 |
| 94. 509 | 169. 19 | 94. 032 | 148. 02 |
| 94. 509 | 169. 36 | 94. 03  | 148. 19 |
| 94. 506 | 169. 53 | 94. 03  | 148. 36 |
| 94. 506 | 169. 7  | 94. 027 | 148. 52 |
| 94. 503 | 169. 87 | 94. 022 | 148. 69 |
| 94. 503 | 170. 04 | 94. 02  | 148. 86 |
| 94. 501 | 170. 21 | 94. 015 | 149. 03 |
| 94. 498 | 170. 38 | 94. 012 | 149. 2  |
| 94. 495 | 170. 55 | 94. 01  | 149. 37 |
| 94. 495 | 170. 72 | 94. 007 | 149. 54 |
| 94. 492 | 170. 89 | 94. 002 | 149. 7  |
| 94. 489 | 171. 06 | 94      | 149. 87 |
| 94. 486 | 171. 23 | 93. 995 | 150. 04 |
| 94. 484 | 171. 4  | 93. 993 | 150. 21 |
| 94. 484 | 171. 57 | 93. 99  | 150. 38 |
| 94. 481 | 171. 74 | 93. 988 | 150. 55 |
| 94. 478 | 171. 91 | 93. 985 | 150. 71 |
| 94. 475 | 172. 08 | 93. 983 | 150. 88 |
| 94. 475 | 172. 24 | 93. 98  | 151. 05 |
| 94. 472 | 172. 41 | 93. 975 | 151. 22 |
| 94. 47  | 172. 58 | 93. 973 | 151. 39 |
| 94. 467 | 172. 75 | 93. 97  | 151. 56 |
| 94. 467 | 172. 92 | 93. 968 | 151. 73 |
| 94. 464 | 173. 09 | 93. 963 | 151. 9  |
| 94. 464 | 173. 26 | 93. 96  | 152. 06 |

|        |        |        |        |
|--------|--------|--------|--------|
| 94.461 | 173.43 | 93.955 | 152.23 |
| 94.461 | 173.6  | 93.955 | 152.4  |
| 94.458 | 173.77 | 93.953 | 152.57 |
| 94.458 | 173.94 | 93.951 | 152.74 |
| 94.455 | 174.11 | 93.948 | 152.91 |
| 94.453 | 174.28 | 93.946 | 153.08 |
| 94.453 | 174.45 | 93.943 | 153.25 |
| 94.45  | 174.62 | 93.941 | 153.41 |
| 94.45  | 174.79 | 93.938 | 153.58 |
| 94.447 | 174.96 | 93.936 | 153.75 |
| 94.447 | 175.13 | 93.933 | 153.92 |
| 94.444 | 175.3  | 93.928 | 154.09 |
| 94.441 | 175.47 | 93.926 | 154.26 |
| 94.441 | 175.64 | 93.921 | 154.43 |
| 94.438 | 175.8  | 93.918 | 154.59 |
| 94.438 | 175.97 | 93.916 | 154.76 |
| 94.436 | 176.14 | 93.916 | 154.93 |
| 94.433 | 176.31 | 93.913 | 155.1  |
| 94.433 | 176.48 | 93.911 | 155.27 |
| 94.43  | 176.65 | 93.906 | 155.44 |
| 94.43  | 176.82 | 93.904 | 155.61 |
| 94.427 | 176.99 | 93.904 | 155.77 |
| 94.424 | 177.16 | 93.901 | 155.94 |
| 94.424 | 177.33 | 93.896 | 156.11 |
| 94.422 | 177.5  | 93.894 | 156.28 |
| 94.422 | 177.67 | 93.891 | 156.45 |
| 94.416 | 177.84 | 93.886 | 156.62 |
| 94.416 | 178.01 | 93.884 | 156.79 |
| 94.413 | 178.18 | 93.881 | 156.95 |
| 94.41  | 178.35 | 93.876 | 157.12 |
| 94.41  | 178.52 | 93.874 | 157.29 |
| 94.407 | 178.69 | 93.872 | 157.46 |
| 94.405 | 178.86 | 93.869 | 157.63 |
| 94.405 | 179.03 | 93.867 | 157.8  |
| 94.402 | 179.2  | 93.864 | 157.97 |
| 94.402 | 179.37 | 93.859 | 158.13 |
| 94.399 | 179.53 | 93.857 | 158.3  |
| 94.399 | 179.7  | 93.854 | 158.47 |
| 94.396 | 179.87 | 93.852 | 158.64 |
| 94.396 | 180.04 | 93.847 | 158.81 |
| 94.396 | 180.21 | 93.844 | 158.98 |
| 94.393 | 180.38 | 93.842 | 159.15 |
| 94.393 | 180.55 | 93.839 | 159.32 |
| 94.391 | 180.72 | 93.837 | 159.48 |
| 94.391 | 180.89 | 93.834 | 159.65 |
| 94.388 | 181.06 | 93.832 | 159.82 |
| 94.388 | 181.23 | 93.827 | 159.99 |
| 94.385 | 181.4  | 93.827 | 160.16 |
| 94.382 | 181.57 | 93.825 | 160.33 |
| 94.382 | 181.74 | 93.822 | 160.5  |
| 94.379 | 181.91 | 93.82  | 160.67 |
| 94.379 | 182.08 | 93.82  | 160.83 |
| 94.376 | 182.25 | 93.817 | 161    |
| 94.374 | 182.42 | 93.817 | 161.17 |

|         |         |         |         |
|---------|---------|---------|---------|
| 94. 371 | 182. 59 | 93. 812 | 161. 34 |
| 94. 371 | 182. 76 | 93. 81  | 161. 51 |
| 94. 368 | 182. 93 | 93. 807 | 161. 68 |
| 94. 368 | 183. 1  | 93. 807 | 161. 85 |
| 94. 365 | 183. 27 | 93. 805 | 162. 02 |
| 94. 365 | 183. 44 | 93. 802 | 162. 18 |
| 94. 362 | 183. 61 | 93. 797 | 162. 35 |
| 94. 36  | 183. 78 | 93. 795 | 162. 52 |
| 94. 357 | 183. 95 | 93. 79  | 162. 69 |
| 94. 357 | 184. 12 | 93. 788 | 162. 86 |
| 94. 354 | 184. 29 | 93. 785 | 163. 03 |
| 94. 354 | 184. 45 | 93. 783 | 163. 2  |
| 94. 351 | 184. 62 | 93. 78  | 163. 37 |
| 94. 348 | 184. 79 | 93. 778 | 163. 53 |
| 94. 348 | 184. 96 | 93. 778 | 163. 7  |
| 94. 345 | 185. 13 | 93. 775 | 163. 87 |
| 94. 343 | 185. 3  | 93. 773 | 164. 04 |
| 94. 343 | 185. 47 | 93. 77  | 164. 21 |
| 94. 343 | 185. 64 | 93. 768 | 164. 38 |
| 94. 343 | 185. 81 | 93. 765 | 164. 55 |
| 94. 34  | 185. 98 | 93. 76  | 164. 71 |
| 94. 34  | 186. 15 | 93. 758 | 164. 88 |
| 94. 34  | 186. 32 | 93. 758 | 165. 05 |
| 94. 337 | 186. 49 | 93. 755 | 165. 22 |
| 94. 334 | 186. 66 | 93. 75  | 165. 39 |
| 94. 334 | 186. 83 | 93. 748 | 165. 56 |
| 94. 331 | 187     | 93. 746 | 165. 73 |
| 94. 331 | 187. 17 | 93. 743 | 165. 9  |
| 94. 329 | 187. 34 | 93. 741 | 166. 06 |
| 94. 329 | 187. 51 | 93. 738 | 166. 23 |
| 94. 326 | 187. 68 | 93. 736 | 166. 4  |
| 94. 323 | 187. 85 | 93. 733 | 166. 57 |
| 94. 32  | 188. 02 | 93. 728 | 166. 74 |
| 94. 32  | 188. 19 | 93. 726 | 166. 91 |
| 94. 317 | 188. 36 | 93. 723 | 167. 08 |
| 94. 314 | 188. 53 | 93. 723 | 167. 25 |
| 94. 314 | 188. 7  | 93. 721 | 167. 41 |
| 94. 314 | 188. 87 | 93. 718 | 167. 58 |
| 94. 314 | 189. 04 | 93. 716 | 167. 75 |
| 94. 314 | 189. 21 | 93. 713 | 167. 92 |
| 94. 312 | 189. 38 | 93. 708 | 168. 09 |
| 94. 312 | 189. 55 | 93. 706 | 168. 26 |
| 94. 312 | 189. 72 | 93. 704 | 168. 43 |
| 94. 309 | 189. 89 | 93. 701 | 168. 59 |
| 94. 306 | 190. 06 | 93. 699 | 168. 76 |
| 94. 303 | 190. 23 | 93. 696 | 168. 93 |
| 94. 303 | 190. 4  | 93. 691 | 169. 1  |
| 94. 3   | 190. 57 | 93. 689 | 169. 27 |
| 94. 295 | 190. 74 | 93. 686 | 169. 44 |
| 94. 292 | 190. 91 | 93. 684 | 169. 61 |
| 94. 289 | 191. 08 | 93. 681 | 169. 78 |
| 94. 289 | 191. 25 | 93. 679 | 169. 95 |
| 94. 286 | 191. 42 | 93. 676 | 170. 11 |
| 94. 283 | 191. 59 | 93. 674 | 170. 28 |

|         |         |         |         |
|---------|---------|---------|---------|
| 94. 281 | 191. 76 | 93. 671 | 170. 45 |
| 94. 278 | 191. 93 | 93. 669 | 170. 62 |
| 94. 278 | 192. 1  | 93. 666 | 170. 79 |
| 94. 275 | 192. 27 | 93. 664 | 170. 96 |
| 94. 272 | 192. 44 | 93. 662 | 171. 13 |
| 94. 272 | 192. 61 | 93. 657 | 171. 3  |
| 94. 269 | 192. 78 | 93. 654 | 171. 47 |
| 94. 267 | 192. 95 | 93. 652 | 171. 63 |
| 94. 264 | 193. 12 | 93. 649 | 171. 8  |
| 94. 261 | 193. 29 | 93. 647 | 171. 97 |
| 94. 261 | 193. 46 | 93. 642 | 172. 14 |
| 94. 258 | 193. 63 | 93. 639 | 172. 31 |
| 94. 255 | 193. 8  | 93. 634 | 172. 48 |
| 94. 252 | 193. 97 | 93. 634 | 172. 65 |
| 94. 252 | 194. 14 | 93. 629 | 172. 82 |
| 94. 25  | 194. 31 | 93. 627 | 172. 99 |
| 94. 25  | 194. 48 | 93. 624 | 173. 16 |
| 94. 247 | 194. 65 | 93. 622 | 173. 32 |
| 94. 244 | 194. 82 | 93. 62  | 173. 49 |
| 94. 241 | 194. 99 | 93. 617 | 173. 66 |
| 94. 238 | 195. 16 | 93. 615 | 173. 83 |
| 94. 236 | 195. 33 | 93. 612 | 174     |
| 94. 233 | 195. 5  | 93. 61  | 174. 17 |
| 94. 23  | 195. 67 | 93. 607 | 174. 34 |
| 94. 227 | 195. 84 | 93. 602 | 174. 51 |
| 94. 221 | 196. 01 | 93. 6   | 174. 67 |
| 94. 219 | 196. 18 | 93. 595 | 174. 84 |
| 94. 216 | 196. 35 | 93. 59  | 175. 01 |
| 94. 21  | 196. 52 | 93. 585 | 175. 18 |
| 94. 21  | 196. 69 | 93. 58  | 175. 35 |
| 94. 205 | 196. 86 | 93. 578 | 175. 52 |
| 94. 205 | 197. 03 | 93. 573 | 175. 69 |
| 94. 199 | 197. 2  | 93. 57  | 175. 86 |
| 94. 196 | 197. 37 | 93. 565 | 176. 03 |
| 94. 193 | 197. 54 | 93. 563 | 176. 2  |
| 94. 19  | 197. 71 | 93. 56  | 176. 36 |
| 94. 188 | 197. 88 | 93. 555 | 176. 53 |
| 94. 185 | 198. 05 | 93. 553 | 176. 7  |
| 94. 179 | 198. 22 | 93. 55  | 176. 87 |
| 94. 176 | 198. 39 | 93. 545 | 177. 04 |
| 94. 174 | 198. 56 | 93. 543 | 177. 21 |
| 94. 174 | 198. 73 | 93. 543 | 177. 38 |
| 94. 171 | 198. 9  | 93. 538 | 177. 55 |
| 94. 165 | 199. 07 | 93. 536 | 177. 72 |
| 94. 162 | 199. 24 | 93. 533 | 177. 89 |
| 94. 162 | 199. 41 | 93. 531 | 178. 06 |
| 94. 159 | 199. 58 | 93. 528 | 178. 22 |
| 94. 157 | 199. 75 | 93. 526 | 178. 39 |
| 94. 151 | 199. 92 | 93. 521 | 178. 56 |
| 94. 151 | 200. 09 | 93. 516 | 178. 73 |
| 94. 148 | 200. 26 | 93. 513 | 178. 9  |
| 94. 145 | 200. 43 | 93. 508 | 179. 07 |
| 94. 143 | 200. 6  | 93. 503 | 179. 24 |
| 94. 14  | 200. 77 | 93. 501 | 179. 41 |

|        |        |        |        |
|--------|--------|--------|--------|
| 94.137 | 200.94 | 93.496 | 179.58 |
| 94.137 | 201.11 | 93.494 | 179.75 |
| 94.134 | 201.28 | 93.491 | 179.92 |
| 94.131 | 201.45 | 93.484 | 180.09 |
| 94.128 | 201.62 | 93.481 | 180.25 |
| 94.126 | 201.79 | 93.476 | 180.42 |
| 94.123 | 201.96 | 93.471 | 180.59 |
| 94.117 | 202.13 | 93.471 | 180.76 |
| 94.114 | 202.3  | 93.466 | 180.93 |
| 94.109 | 202.48 | 93.464 | 181.1  |
| 94.103 | 202.65 | 93.461 | 181.27 |
| 94.1   | 202.82 | 93.457 | 181.44 |
| 94.095 | 202.99 | 93.457 | 181.61 |
| 94.095 | 203.16 | 93.452 | 181.78 |
| 94.089 | 203.33 | 93.449 | 181.95 |
| 94.086 | 203.5  | 93.442 | 182.11 |
| 94.081 | 203.67 | 93.439 | 182.28 |
| 94.081 | 203.84 | 93.434 | 182.45 |
| 94.075 | 204.01 | 93.432 | 182.62 |
| 94.072 | 204.18 | 93.424 | 182.79 |
| 94.069 | 204.35 | 93.419 | 182.96 |
| 94.066 | 204.52 | 93.417 | 183.13 |
| 94.061 | 204.69 | 93.412 | 183.3  |
| 94.058 | 204.86 | 93.407 | 183.47 |
| 94.055 | 205.03 | 93.402 | 183.64 |
| 94.049 | 205.2  | 93.397 | 183.8  |
| 94.047 | 205.37 | 93.39  | 183.97 |
| 94.038 | 205.54 | 93.387 | 184.14 |
| 94.035 | 205.71 | 93.382 | 184.31 |
| 94.03  | 205.88 | 93.377 | 184.48 |
| 94.027 | 206.05 | 93.373 | 184.65 |
| 94.024 | 206.22 | 93.37  | 184.82 |
| 94.021 | 206.39 | 93.363 | 184.99 |
| 94.016 | 206.56 | 93.36  | 185.16 |
| 94.013 | 206.73 | 93.355 | 185.33 |
| 94.007 | 206.9  | 93.35  | 185.5  |
| 94.004 | 207.07 | 93.343 | 185.66 |
| 94.002 | 207.25 | 93.335 | 185.83 |
| 93.993 | 207.42 | 93.331 | 186    |
| 93.985 | 207.59 | 93.326 | 186.17 |
| 93.982 | 207.76 | 93.323 | 186.34 |
| 93.976 | 207.93 | 93.316 | 186.51 |
| 93.973 | 208.1  | 93.313 | 186.68 |
| 93.968 | 208.27 | 93.308 | 186.85 |
| 93.962 | 208.44 | 93.298 | 187.02 |
| 93.959 | 208.61 | 93.291 | 187.19 |
| 93.956 | 208.78 | 93.284 | 187.36 |
| 93.951 | 208.95 | 93.279 | 187.53 |
| 93.945 | 209.12 | 93.276 | 187.7  |
| 93.942 | 209.29 | 93.271 | 187.86 |
| 93.937 | 209.46 | 93.269 | 188.03 |
| 93.931 | 209.63 | 93.266 | 188.2  |
| 93.923 | 209.8  | 93.261 | 188.37 |
| 93.917 | 209.97 | 93.259 | 188.54 |

|        |        |        |        |
|--------|--------|--------|--------|
| 93.911 | 210.14 | 93.251 | 188.71 |
| 93.9   | 210.32 | 93.244 | 188.88 |
| 93.894 | 210.49 | 93.237 | 189.05 |
| 93.886 | 210.66 | 93.229 | 189.22 |
| 93.883 | 210.83 | 93.224 | 189.39 |
| 93.875 | 211    | 93.217 | 189.56 |
| 93.872 | 211.17 | 93.209 | 189.73 |
| 93.863 | 211.34 | 93.205 | 189.9  |
| 93.861 | 211.51 | 93.2   | 190.07 |
| 93.852 | 211.68 | 93.192 | 190.24 |
| 93.849 | 211.85 | 93.185 | 190.41 |
| 93.844 | 212.02 | 93.18  | 190.58 |
| 93.838 | 212.19 | 93.175 | 190.75 |
| 93.832 | 212.36 | 93.168 | 190.91 |
| 93.83  | 212.53 | 93.158 | 191.08 |
| 93.824 | 212.7  | 93.153 | 191.25 |
| 93.818 | 212.87 | 93.145 | 191.42 |
| 93.813 | 213.05 | 93.135 | 191.59 |
| 93.804 | 213.22 | 93.13  | 191.76 |
| 93.796 | 213.39 | 93.126 | 191.93 |
| 93.79  | 213.56 | 93.116 | 192.1  |
| 93.782 | 213.73 | 93.113 | 192.27 |
| 93.773 | 213.9  | 93.106 | 192.44 |
| 93.77  | 214.07 | 93.096 | 192.61 |
| 93.759 | 214.24 | 93.091 | 192.78 |
| 93.751 | 214.41 | 93.086 | 192.95 |
| 93.742 | 214.58 | 93.079 | 193.12 |
| 93.734 | 214.75 | 93.071 | 193.29 |
| 93.725 | 214.92 | 93.064 | 193.46 |
| 93.717 | 215.09 | 93.056 | 193.63 |
| 93.711 | 215.26 | 93.051 | 193.8  |
| 93.706 | 215.43 | 93.044 | 193.97 |
| 93.697 | 215.61 | 93.039 | 194.14 |
| 93.692 | 215.78 | 93.027 | 194.31 |
| 93.686 | 215.95 | 93.014 | 194.48 |
| 93.68  | 216.12 | 93.009 | 194.65 |
| 93.675 | 216.29 | 93.004 | 194.82 |
| 93.669 | 216.46 | 92.997 | 194.99 |
| 93.663 | 216.63 | 92.985 | 195.16 |
| 93.652 | 216.8  | 92.977 | 195.32 |
| 93.644 | 216.97 | 92.97  | 195.49 |
| 93.635 | 217.14 | 92.962 | 195.66 |
| 93.624 | 217.31 | 92.955 | 195.83 |
| 93.61  | 217.48 | 92.943 | 196    |
| 93.601 | 217.65 | 92.933 | 196.17 |
| 93.596 | 217.83 | 92.925 | 196.34 |
| 93.587 | 218    | 92.918 | 196.51 |
| 93.582 | 218.17 | 92.911 | 196.68 |
| 93.57  | 218.34 | 92.903 | 196.85 |
| 93.559 | 218.51 | 92.893 | 197.02 |
| 93.551 | 218.68 | 92.883 | 197.19 |
| 93.536 | 218.85 | 92.871 | 197.36 |
| 93.52  | 219.02 | 92.864 | 197.53 |
| 93.508 | 219.19 | 92.854 | 197.7  |

|        |        |        |        |
|--------|--------|--------|--------|
| 93.503 | 219.36 | 92.846 | 197.87 |
| 93.491 | 219.53 | 92.839 | 198.04 |
| 93.483 | 219.7  | 92.829 | 198.21 |
| 93.472 | 219.88 | 92.817 | 198.38 |
| 93.469 | 220.05 | 92.804 | 198.55 |
| 93.458 | 220.22 | 92.795 | 198.72 |
| 93.449 | 220.39 | 92.787 | 198.89 |
| 93.435 | 220.56 | 92.772 | 199.06 |
| 93.427 | 220.73 | 92.76  | 199.23 |
| 93.412 | 220.9  | 92.745 | 199.4  |
| 93.398 | 221.07 | 92.738 | 199.57 |
| 93.381 | 221.24 | 92.728 | 199.74 |
| 93.37  | 221.41 | 92.715 | 199.91 |
| 93.356 | 221.58 | 92.701 | 200.08 |
| 93.345 | 221.76 | 92.691 | 200.25 |
| 93.336 | 221.93 | 92.683 | 200.42 |
| 93.331 | 222.1  | 92.676 | 200.59 |
| 93.322 | 222.27 | 92.661 | 200.76 |
| 93.308 | 222.44 | 92.651 | 200.92 |
| 93.297 | 222.61 | 92.636 | 201.09 |
| 93.286 | 222.78 | 92.619 | 201.26 |
| 93.277 | 222.95 | 92.612 | 201.43 |
| 93.266 | 223.12 | 92.597 | 201.6  |
| 93.255 | 223.29 | 92.592 | 201.77 |
| 93.241 | 223.46 | 92.572 | 201.94 |
| 93.224 | 223.64 | 92.56  | 202.11 |
| 93.209 | 223.81 | 92.547 | 202.28 |
| 93.198 | 223.98 | 92.538 | 202.45 |
| 93.187 | 224.15 | 92.523 | 202.62 |
| 93.176 | 224.32 | 92.505 | 202.79 |
| 93.167 | 224.49 | 92.491 | 202.96 |
| 93.159 | 224.66 | 92.468 | 203.13 |
| 93.142 | 224.83 | 92.459 | 203.3  |
| 93.128 | 225    | 92.444 | 203.47 |
| 93.114 | 225.17 | 92.422 | 203.64 |
| 93.102 | 225.35 | 92.412 | 203.81 |
| 93.08  | 225.52 | 92.409 | 203.98 |
| 93.066 | 225.69 | 92.389 | 204.15 |
| 93.049 | 225.86 | 92.367 | 204.32 |
| 93.038 | 226.03 | 92.355 | 204.49 |
| 93.023 | 226.2  | 92.338 | 204.66 |
| 93.012 | 226.37 | 92.318 | 204.83 |
| 92.992 | 226.54 | 92.305 | 205    |
| 92.976 | 226.71 | 92.296 | 205.17 |
| 92.964 | 226.88 | 92.278 | 205.34 |
| 92.953 | 227.06 | 92.258 | 205.51 |
| 92.939 | 227.23 | 92.241 | 205.68 |
| 92.916 | 227.4  | 92.234 | 205.85 |
| 92.899 | 227.57 | 92.216 | 206.02 |
| 92.885 | 227.74 | 92.199 | 206.19 |
| 92.874 | 227.91 | 92.189 | 206.36 |
| 92.86  | 228.08 | 92.17  | 206.53 |
| 92.846 | 228.25 | 92.147 | 206.7  |
| 92.82  | 228.42 | 92.133 | 206.87 |



|        |        |        |        |
|--------|--------|--------|--------|
| 92.806 | 228.6  | 92.115 | 207.04 |
| 92.798 | 228.77 | 92.098 | 207.21 |
| 92.787 | 228.94 | 92.078 | 207.38 |
| 92.767 | 229.11 | 92.068 | 207.55 |
| 92.75  | 229.28 | 92.036 | 207.72 |
| 92.733 | 229.45 | 92.014 | 207.89 |
| 92.708 | 229.62 | 91.994 | 208.06 |
| 92.691 | 229.79 | 91.982 | 208.24 |
| 92.674 | 229.96 | 91.96  | 208.41 |
| 92.657 | 230.14 | 91.94  | 208.58 |
| 92.643 | 230.31 | 91.932 | 208.75 |
| 92.626 | 230.48 | 91.92  | 208.92 |
| 92.615 | 230.65 | 91.903 | 209.09 |
| 92.592 | 230.82 | 91.885 | 209.26 |
| 92.575 | 230.99 | 91.863 | 209.43 |
| 92.561 | 231.16 | 91.851 | 209.6  |
| 92.547 | 231.33 | 91.834 | 209.77 |
| 92.53  | 231.5  | 91.816 | 209.94 |
| 92.513 | 231.67 | 91.794 | 210.11 |
| 92.502 | 231.84 | 91.777 | 210.28 |
| 92.471 | 232.01 | 91.76  | 210.45 |
| 92.454 | 232.18 | 91.75  | 210.62 |
| 92.429 | 232.35 | 91.737 | 210.79 |
| 92.415 | 232.52 | 91.708 | 210.96 |
| 92.398 | 232.69 | 91.688 | 211.13 |
| 92.381 | 232.86 | 91.673 | 211.3  |
| 92.367 | 233.03 | 91.656 | 211.47 |
| 92.347 | 233.2  | 91.643 | 211.64 |
| 92.324 | 233.37 | 91.626 | 211.81 |
| 92.307 | 233.54 | 91.614 | 211.98 |
| 92.299 | 233.71 | 91.594 | 212.15 |
| 92.276 | 233.88 | 91.577 | 212.32 |
| 92.248 | 234.05 | 91.562 | 212.49 |
| 92.229 | 234.22 | 91.545 | 212.66 |
| 92.212 | 234.39 | 91.537 | 212.83 |
| 92.192 | 234.56 | 91.52  | 213    |
| 92.164 | 234.73 | 91.5   | 213.17 |
| 92.15  | 234.9  | 91.483 | 213.34 |
| 92.136 | 235.07 | 91.463 | 213.51 |
| 92.116 | 235.24 | 91.446 | 213.68 |
| 92.09  | 235.41 | 91.429 | 213.85 |
| 92.065 | 235.58 | 91.414 | 214.02 |
| 92.054 | 235.75 | 91.399 | 214.19 |
| 92.037 | 235.92 | 91.384 | 214.36 |
| 92.023 | 236.09 | 91.362 | 214.54 |
| 92.009 | 236.25 | 91.347 | 214.71 |
| 91.986 | 236.42 | 91.337 | 214.88 |
| 91.964 | 236.59 | 91.322 | 215.05 |
| 91.949 | 236.76 | 91.305 | 215.22 |
| 91.933 | 236.93 | 91.29  | 215.39 |
| 91.904 | 237.1  | 91.278 | 215.56 |
| 91.885 | 237.27 | 91.263 | 215.73 |
| 91.859 | 237.44 | 91.248 | 215.9  |
| 91.837 | 237.61 | 91.228 | 216.07 |

|        |        |        |        |
|--------|--------|--------|--------|
| 91.823 | 237.78 | 91.211 | 216.24 |
| 91.806 | 237.95 | 91.191 | 216.41 |
| 91.786 | 238.12 | 91.179 | 216.58 |
| 91.761 | 238.28 | 91.164 | 216.75 |
| 91.744 | 238.45 | 91.149 | 216.92 |
| 91.727 | 238.62 | 91.135 | 217.09 |
| 91.699 | 238.79 | 91.125 | 217.26 |
| 91.673 | 238.96 | 91.107 | 217.43 |
| 91.654 | 239.13 | 91.085 | 217.6  |
| 91.637 | 239.3  | 91.07  | 217.77 |
| 91.62  | 239.47 | 91.053 | 217.94 |
| 91.597 | 239.64 | 91.041 | 218.11 |
| 91.575 | 239.8  | 91.028 | 218.28 |
| 91.546 | 239.97 | 91.011 | 218.46 |
| 91.529 | 240.14 | 90.991 | 218.63 |
| 91.518 | 240.31 | 90.981 | 218.8  |
| 91.493 | 240.48 | 90.969 | 218.97 |
| 91.465 | 240.65 | 90.942 | 219.14 |
| 91.436 | 240.82 | 90.925 | 219.31 |
| 91.414 | 240.99 | 90.912 | 219.48 |
| 91.405 | 241.16 | 90.89  | 219.65 |
| 91.383 | 241.32 | 90.875 | 219.82 |
| 91.363 | 241.49 | 90.855 | 219.99 |
| 91.341 | 241.66 | 90.843 | 220.16 |
| 91.321 | 241.83 | 90.826 | 220.33 |
| 91.29  | 242    | 90.804 | 220.5  |
| 91.267 | 242.17 | 90.791 | 220.67 |
| 91.242 | 242.34 | 90.779 | 220.84 |
| 91.219 | 242.51 | 90.764 | 221.01 |
| 91.197 | 242.67 | 90.747 | 221.18 |
| 91.169 | 242.84 | 90.727 | 221.35 |
| 91.152 | 243.01 | 90.712 | 221.52 |
| 91.126 | 243.18 | 90.702 | 221.69 |
| 91.109 | 243.35 | 90.692 | 221.86 |
| 91.084 | 243.52 | 90.675 | 222.04 |
| 91.053 | 243.69 | 90.66  | 222.21 |
| 91.036 | 243.85 | 90.645 | 222.38 |
| 91.014 | 244.02 | 90.626 | 222.55 |
| 90.991 | 244.19 | 90.608 | 222.72 |
| 90.963 | 244.36 | 90.599 | 222.89 |
| 90.932 | 244.53 | 90.576 | 223.06 |
| 90.909 | 244.7  | 90.559 | 223.23 |
| 90.898 | 244.86 | 90.544 | 223.4  |
| 90.878 | 245.03 | 90.522 | 223.57 |
| 90.845 | 245.2  | 90.5   | 223.74 |
| 90.819 | 245.37 | 90.485 | 223.91 |
| 90.788 | 245.54 | 90.475 | 224.08 |
| 90.783 | 245.71 | 90.453 | 224.25 |
| 90.757 | 245.87 | 90.445 | 224.42 |
| 90.72  | 246.04 | 90.428 | 224.59 |
| 90.701 | 246.21 | 90.406 | 224.76 |
| 90.678 | 246.38 | 90.386 | 224.94 |
| 90.653 | 246.55 | 90.374 | 225.11 |
| 90.642 | 246.72 | 90.352 | 225.28 |

|        |        |        |        |
|--------|--------|--------|--------|
| 90.608 | 246.89 | 90.339 | 225.45 |
| 90.571 | 247.05 | 90.314 | 225.62 |
| 90.549 | 247.22 | 90.297 | 225.79 |
| 90.526 | 247.39 | 90.287 | 225.96 |
| 90.503 | 247.56 | 90.272 | 226.13 |
| 90.478 | 247.73 | 90.248 | 226.3  |
| 90.447 | 247.9  | 90.238 | 226.47 |
| 90.413 | 248.06 | 90.216 | 226.64 |
| 90.405 | 248.23 | 90.196 | 226.81 |
| 90.377 | 248.4  | 90.179 | 226.98 |
| 90.351 | 248.57 | 90.154 | 227.15 |
| 90.326 | 248.74 | 90.144 | 227.32 |
| 90.295 | 248.91 | 90.127 | 227.49 |
| 90.269 | 249.07 | 90.104 | 227.67 |
| 90.247 | 249.24 | 90.082 | 227.84 |
| 90.222 | 249.41 | 90.075 | 228.01 |
| 90.199 | 249.58 | 90.055 | 228.18 |
| 90.179 | 249.75 | 90.043 | 228.35 |
| 90.145 | 249.92 | 90.023 | 228.52 |
| 90.109 | 250.09 | 89.986 | 228.69 |
| 90.069 | 250.25 | 89.961 | 228.86 |
| 90.041 | 250.42 | 89.949 | 229.03 |
| 90.016 | 250.59 | 89.937 | 229.2  |
| 89.993 | 250.76 | 89.917 | 229.37 |
| 89.962 | 250.93 | 89.899 | 229.54 |
| 89.926 | 251.09 | 89.88  | 229.71 |
| 89.911 | 251.26 | 89.867 | 229.88 |
| 89.892 | 251.43 | 89.848 | 230.05 |
| 89.861 | 251.6  | 89.828 | 230.22 |
| 89.827 | 251.77 | 89.803 | 230.39 |
| 89.787 | 251.94 | 89.778 | 230.56 |
| 89.756 | 252.1  | 89.761 | 230.73 |
| 89.734 | 252.27 | 89.739 | 230.9  |
| 89.714 | 252.44 | 89.719 | 231.07 |
| 89.686 | 252.61 | 89.707 | 231.24 |
| 89.658 | 252.78 | 89.68  | 231.41 |
| 89.63  | 252.95 | 89.66  | 231.58 |
| 89.587 | 253.11 | 89.648 | 231.75 |
| 89.559 | 253.28 | 89.63  | 231.92 |
| 89.537 | 253.45 | 89.608 | 232.09 |
| 89.5   | 253.62 | 89.581 | 232.26 |
| 89.469 | 253.79 | 89.561 | 232.43 |
| 89.444 | 253.96 | 89.546 | 232.6  |
| 89.427 | 254.12 | 89.524 | 232.77 |
| 89.384 | 254.29 | 89.504 | 232.94 |
| 89.351 | 254.46 | 89.487 | 233.11 |
| 89.311 | 254.63 | 89.46  | 233.28 |
| 89.286 | 254.8  | 89.45  | 233.45 |
| 89.26  | 254.97 | 89.433 | 233.62 |
| 89.235 | 255.13 | 89.405 | 233.78 |
| 89.201 | 255.3  | 89.371 | 233.95 |
| 89.165 | 255.47 | 89.354 | 234.12 |
| 89.128 | 255.64 | 89.339 | 234.29 |
| 89.091 | 255.81 | 89.321 | 234.46 |

|        |        |        |        |
|--------|--------|--------|--------|
| 89.063 | 255.98 | 89.292 | 234.63 |
| 89.026 | 256.14 | 89.26  | 234.8  |
| 88.995 | 256.31 | 89.237 | 234.97 |
| 88.976 | 256.48 | 89.223 | 235.14 |
| 88.928 | 256.65 | 89.208 | 235.31 |
| 88.9   | 256.82 | 89.191 | 235.48 |
| 88.86  | 256.98 | 89.161 | 235.65 |
| 88.838 | 257.15 | 89.134 | 235.82 |
| 88.801 | 257.32 | 89.109 | 235.98 |
| 88.764 | 257.49 | 89.094 | 236.15 |
| 88.73  | 257.66 | 89.079 | 236.32 |
| 88.702 | 257.83 | 89.05  | 236.49 |
| 88.668 | 257.99 | 89.027 | 236.66 |
| 88.637 | 258.16 | 89     | 236.83 |
| 88.595 | 258.33 | 88.988 | 237    |
| 88.55  | 258.5  | 88.968 | 237.17 |
| 88.53  | 258.67 | 88.936 | 237.34 |
| 88.499 | 258.84 | 88.911 | 237.5  |
| 88.46  | 259    | 88.892 | 237.67 |
| 88.412 | 259.17 | 88.867 | 237.84 |
| 88.384 | 259.34 | 88.852 | 238.01 |
| 88.341 | 259.51 | 88.83  | 238.18 |
| 88.327 | 259.68 | 88.798 | 238.35 |
| 88.285 | 259.85 | 88.783 | 238.52 |
| 88.234 | 260.01 | 88.753 | 238.69 |
| 88.2   | 260.18 | 88.741 | 238.86 |
| 88.172 | 260.35 | 88.714 | 239.03 |
| 88.136 | 260.52 | 88.687 | 239.19 |
| 88.099 | 260.69 | 88.662 | 239.36 |
| 88.06  | 260.86 | 88.632 | 239.53 |
| 88.012 | 261.02 | 88.61  | 239.7  |
| 87.989 | 261.19 | 88.593 | 239.87 |
| 87.958 | 261.36 | 88.568 | 240.04 |
| 87.904 | 261.53 | 88.553 | 240.21 |
| 87.876 | 261.7  | 88.519 | 240.38 |
| 87.823 | 261.87 | 88.491 | 240.54 |
| 87.797 | 262.04 | 88.464 | 240.71 |
| 87.766 | 262.2  | 88.437 | 240.88 |
| 87.735 | 262.37 | 88.407 | 241.05 |
| 87.685 | 262.54 | 88.395 | 241.22 |
| 87.645 | 262.71 | 88.365 | 241.39 |
| 87.614 | 262.88 | 88.338 | 241.56 |
| 87.572 | 263.05 | 88.321 | 241.73 |
| 87.538 | 263.21 | 88.296 | 241.9  |
| 87.49  | 263.38 | 88.269 | 242.06 |
| 87.442 | 263.55 | 88.252 | 242.23 |
| 87.397 | 263.72 | 88.22  | 242.4  |
| 87.369 | 263.89 | 88.193 | 242.57 |
| 87.324 | 264.06 | 88.18  | 242.74 |
| 87.287 | 264.22 | 88.156 | 242.91 |
| 87.236 | 264.39 | 88.116 | 243.08 |
| 87.2   | 264.56 | 88.099 | 243.25 |
| 87.16  | 264.73 | 88.067 | 243.42 |
| 87.121 | 264.9  | 88.047 | 243.59 |

|        |        |        |        |
|--------|--------|--------|--------|
| 87.076 | 265.07 | 88.017 | 243.76 |
| 87.033 | 265.23 | 87.988 | 243.92 |
| 86.994 | 265.4  | 87.953 | 244.09 |
| 86.969 | 265.57 | 87.926 | 244.26 |
| 86.921 | 265.74 | 87.906 | 244.43 |
| 86.878 | 265.91 | 87.879 | 244.6  |
| 86.822 | 266.08 | 87.847 | 244.77 |
| 86.783 | 266.24 | 87.825 | 244.94 |
| 86.732 | 266.41 | 87.805 | 245.11 |
| 86.718 | 266.58 | 87.78  | 245.28 |
| 86.667 | 266.75 | 87.743 | 245.45 |
| 86.628 | 266.92 | 87.708 | 245.62 |
| 86.577 | 267.09 | 87.694 | 245.79 |
| 86.535 | 267.26 | 87.674 | 245.96 |
| 86.495 | 267.42 | 87.634 | 246.13 |
| 86.453 | 267.59 | 87.602 | 246.3  |
| 86.402 | 267.76 | 87.57  | 246.47 |
| 86.349 | 267.93 | 87.55  | 246.63 |
| 86.315 | 268.1  | 87.531 | 246.8  |
| 86.264 | 268.27 | 87.503 | 246.97 |
| 86.213 | 268.43 | 87.466 | 247.14 |
| 86.199 | 268.6  | 87.437 | 247.31 |
| 86.14  | 268.77 | 87.402 | 247.48 |
| 86.095 | 268.94 | 87.385 | 247.65 |
| 86.038 | 269.11 | 87.365 | 247.82 |
| 86.013 | 269.28 | 87.326 | 247.99 |
| 85.951 | 269.45 | 87.286 | 248.16 |
| 85.906 | 269.61 | 87.266 | 248.33 |
| 85.85  | 269.78 | 87.244 | 248.5  |
| 85.793 | 269.95 | 87.197 | 248.67 |
| 85.765 | 270.12 | 87.167 | 248.84 |
| 85.734 | 270.29 | 87.143 | 249    |
| 85.695 | 270.46 | 87.113 | 249.17 |
| 85.63  | 270.63 | 87.086 | 249.34 |
| 85.565 | 270.79 | 87.046 | 249.51 |
| 85.52  | 270.96 | 87.009 | 249.68 |
| 85.509 | 271.13 | 86.997 | 249.85 |
| 85.438 | 271.3  | 86.953 | 250.02 |
| 85.384 | 271.47 | 86.93  | 250.19 |
| 85.331 | 271.64 | 86.898 | 250.36 |
| 85.289 | 271.81 | 86.869 | 250.53 |
| 85.263 | 271.97 | 86.841 | 250.7  |
| 85.213 | 272.14 | 86.819 | 250.87 |
| 85.148 | 272.31 | 86.777 | 251.03 |
| 85.097 | 272.48 | 86.743 | 251.2  |
| 85.055 | 272.65 | 86.713 | 251.37 |
| 84.993 | 272.82 | 86.681 | 251.54 |
| 84.964 | 272.99 | 86.666 | 251.71 |
| 84.911 | 273.15 | 86.626 | 251.88 |
| 84.855 | 273.32 | 86.592 | 252.05 |
| 84.795 | 273.49 | 86.552 | 252.22 |
| 84.767 | 273.66 | 86.525 | 252.39 |
| 84.716 | 273.83 | 86.491 | 252.56 |
| 84.663 | 274    | 86.471 | 252.73 |

|        |        |        |        |
|--------|--------|--------|--------|
| 84.595 | 274.17 | 86.431 | 252.89 |
| 84.553 | 274.33 | 86.397 | 253.06 |
| 84.502 | 274.5  | 86.372 | 253.23 |
| 84.454 | 274.67 | 86.337 | 253.4  |
| 84.418 | 274.84 | 86.3   | 253.57 |
| 84.35  | 275.01 | 86.256 | 253.74 |
| 84.288 | 275.18 | 86.226 | 253.91 |
| 84.254 | 275.35 | 86.194 | 254.08 |
| 84.198 | 275.52 | 86.17  | 254.25 |
| 84.158 | 275.68 | 86.132 | 254.41 |
| 84.088 | 275.85 | 86.088 | 254.58 |
| 84.029 | 276.02 | 86.063 | 254.75 |
| 83.992 | 276.19 | 86.034 | 254.92 |
| 83.941 | 276.36 | 86.002 | 255.09 |
| 83.893 | 276.53 | 85.972 | 255.26 |
| 83.829 | 276.7  | 85.925 | 255.43 |
| 83.772 | 276.86 | 85.898 | 255.6  |
| 83.727 | 277.03 | 85.861 | 255.76 |
| 83.682 | 277.2  | 85.829 | 255.93 |
| 83.634 | 277.37 | 85.799 | 256.1  |
| 83.566 | 277.54 | 85.757 | 256.27 |
| 83.513 | 277.71 | 85.717 | 256.44 |
| 83.456 | 277.88 | 85.685 | 256.61 |
| 83.425 | 278.05 | 85.653 | 256.78 |
| 83.358 | 278.22 | 85.626 | 256.94 |
| 83.307 | 278.38 | 85.579 | 257.11 |
| 83.253 | 278.55 | 85.542 | 257.28 |
| 83.191 | 278.72 | 85.503 | 257.45 |
| 83.166 | 278.89 | 85.475 | 257.62 |
| 83.084 | 279.06 | 85.448 | 257.79 |
| 83.036 | 279.23 | 85.404 | 257.96 |
| 82.974 | 279.4  | 85.359 | 258.13 |
| 82.929 | 279.57 | 85.33  | 258.29 |
| 82.867 | 279.73 | 85.298 | 258.46 |
| 82.814 | 279.9  | 85.263 | 258.63 |
| 82.757 | 280.07 | 85.233 | 258.8  |
| 82.684 | 280.24 | 85.179 | 258.97 |
| 82.656 | 280.41 | 85.144 | 259.14 |
| 82.597 | 280.58 | 85.12  | 259.31 |
| 82.546 | 280.75 | 85.09  | 259.48 |
| 82.492 | 280.92 | 85.048 | 259.64 |
| 82.411 | 281.08 | 85.009 | 259.81 |
| 82.377 | 281.25 | 84.969 | 259.98 |
| 82.312 | 281.42 | 84.937 | 260.15 |
| 82.264 | 281.59 | 84.902 | 260.32 |
| 82.219 | 281.76 | 84.863 | 260.49 |
| 82.146 | 281.93 | 84.821 | 260.66 |
| 82.098 | 282.1  | 84.771 | 260.83 |
| 82.044 | 282.27 | 84.739 | 260.99 |
| 81.996 | 282.44 | 84.702 | 261.16 |
| 81.94  | 282.61 | 84.665 | 261.33 |
| 81.872 | 282.77 | 84.628 | 261.5  |
| 81.813 | 282.94 | 84.596 | 261.67 |
| 81.759 | 283.11 | 84.554 | 261.84 |

|        |        |        |        |
|--------|--------|--------|--------|
| 81.726 | 283.28 | 84.524 | 262.01 |
| 81.666 | 283.45 | 84.487 | 262.17 |
| 81.599 | 283.62 | 84.438 | 262.34 |
| 81.548 | 283.79 | 84.411 | 262.51 |
| 81.489 | 283.96 | 84.366 | 262.68 |
| 81.427 | 284.13 | 84.324 | 262.85 |
| 81.402 | 284.29 | 84.29  | 263.02 |
| 81.32  | 284.46 | 84.255 | 263.19 |
| 81.277 | 284.63 | 84.206 | 263.35 |
| 81.23  | 284.8  | 84.166 | 263.52 |
| 81.182 | 284.97 | 84.129 | 263.69 |
| 81.114 | 285.14 | 84.097 | 263.86 |
| 81.063 | 285.31 | 84.058 | 264.03 |
| 80.987 | 285.48 | 84.018 | 264.2  |
| 80.939 | 285.65 | 83.966 | 264.37 |
| 80.891 | 285.82 | 83.939 | 264.53 |
| 80.838 | 285.98 | 83.904 | 264.7  |
| 80.779 | 286.15 | 83.857 | 264.87 |
| 80.717 | 286.32 | 83.82  | 265.04 |
| 80.666 | 286.49 | 83.781 | 265.21 |
| 80.621 | 286.66 | 83.751 | 265.38 |
| 80.553 | 286.83 | 83.707 | 265.55 |
| 80.494 | 287    | 83.67  | 265.72 |
| 80.432 | 287.17 | 83.62  | 265.88 |
| 80.384 | 287.34 | 83.591 | 266.05 |
| 80.339 | 287.51 | 83.549 | 266.22 |
| 80.291 | 287.67 | 83.512 | 266.39 |
| 80.22  | 287.84 | 83.452 | 266.56 |
| 80.173 | 288.01 | 83.418 | 266.73 |
| 80.11  | 288.18 | 83.391 | 266.9  |
| 80.057 | 288.35 | 83.349 | 267.07 |
| 80.001 | 288.52 | 83.307 | 267.24 |
| 79.953 | 288.69 | 83.262 | 267.41 |
| 79.885 | 288.86 | 83.213 | 267.57 |
| 79.837 | 289.03 | 83.193 | 267.74 |
| 79.795 | 289.2  | 83.141 | 267.91 |
| 79.733 | 289.37 | 83.111 | 268.08 |
| 79.682 | 289.54 | 83.062 | 268.25 |
| 79.617 | 289.71 | 83.027 | 268.42 |
| 79.564 | 289.87 | 82.983 | 268.59 |
| 79.53  | 290.04 | 82.946 | 268.76 |
| 79.476 | 290.21 | 82.909 | 268.93 |
| 79.426 | 290.38 | 82.862 | 269.09 |
| 79.355 | 290.55 | 82.813 | 269.26 |
| 79.296 | 290.72 | 82.79  | 269.43 |
| 79.251 | 290.89 | 82.751 | 269.6  |
| 79.211 | 291.06 | 82.704 | 269.77 |
| 79.161 | 291.23 | 82.659 | 269.94 |
| 79.09  | 291.4  | 82.61  | 270.11 |
| 79.042 | 291.57 | 82.59  | 270.28 |
| 79.006 | 291.74 | 82.546 | 270.45 |
| 78.952 | 291.91 | 82.504 | 270.61 |
| 78.896 | 292.07 | 82.457 | 270.78 |
| 78.845 | 292.24 | 82.405 | 270.95 |

|        |        |        |        |
|--------|--------|--------|--------|
| 78.788 | 292.41 | 82.38  | 271.12 |
| 78.746 | 292.58 | 82.348 | 271.29 |
| 78.707 | 292.75 | 82.296 | 271.46 |
| 78.656 | 292.92 | 82.264 | 271.63 |
| 78.597 | 293.09 | 82.217 | 271.8  |
| 78.543 | 293.26 | 82.178 | 271.97 |
| 78.49  | 293.43 | 82.128 | 272.14 |
| 78.453 | 293.6  | 82.109 | 272.3  |
| 78.394 | 293.77 | 82.059 | 272.47 |
| 78.343 | 293.94 | 82.02  | 272.64 |
| 78.298 | 294.11 | 81.978 | 272.81 |
| 78.244 | 294.27 | 81.943 | 272.98 |
| 78.219 | 294.44 | 81.894 | 273.15 |
| 78.151 | 294.61 | 81.864 | 273.32 |
| 78.089 | 294.78 | 81.822 | 273.49 |
| 78.058 | 294.95 | 81.778 | 273.66 |
| 77.999 | 295.12 | 81.74  | 273.83 |
| 77.968 | 295.29 | 81.708 | 274    |
| 77.92  | 295.46 | 81.654 | 274.17 |
| 77.872 | 295.63 | 81.634 | 274.33 |
| 77.81  | 295.8  | 81.58  | 274.5  |
| 77.768 | 295.97 | 81.543 | 274.67 |
| 77.731 | 296.14 | 81.508 | 274.84 |
| 77.692 | 296.31 | 81.469 | 275.01 |
| 77.647 | 296.48 | 81.412 | 275.18 |
| 77.59  | 296.65 | 81.377 | 275.35 |
| 77.534 | 296.82 | 81.333 | 275.52 |
| 77.492 | 296.99 | 81.311 | 275.69 |
| 77.461 | 297.16 | 81.261 | 275.86 |
| 77.421 | 297.33 | 81.217 | 276.03 |
| 77.354 | 297.5  | 81.18  | 276.2  |
| 77.309 | 297.67 | 81.148 | 276.37 |
| 77.275 | 297.83 | 81.108 | 276.54 |
| 77.23  | 298    | 81.078 | 276.71 |
| 77.187 | 298.17 | 81.029 | 276.87 |
| 77.137 | 298.34 | 80.98  | 277.04 |
| 77.08  | 298.51 | 80.948 | 277.21 |
| 77.046 | 298.68 | 80.913 | 277.38 |
| 76.999 | 298.85 | 80.859 | 277.55 |
| 76.948 | 299.02 | 80.827 | 277.72 |
| 76.922 | 299.19 | 80.787 | 277.89 |
| 76.869 | 299.36 | 80.752 | 278.06 |
| 76.829 | 299.53 | 80.713 | 278.23 |
| 76.793 | 299.7  | 80.676 | 278.4  |
| 76.742 | 299.87 | 80.631 | 278.57 |
| 76.7   | 300.04 | 80.589 | 278.74 |
| 76.666 | 300.21 | 80.55  | 278.91 |
| 76.612 | 300.38 | 80.51  | 279.08 |
| 76.57  | 300.55 | 80.481 | 279.25 |
| 76.539 | 300.72 | 80.446 | 279.42 |
| 76.502 | 300.89 | 80.402 | 279.59 |
| 76.46  | 301.06 | 80.355 | 279.76 |
| 76.423 | 301.23 | 80.32  | 279.92 |
| 76.361 | 301.4  | 80.29  | 280.09 |



|        |        |        |        |
|--------|--------|--------|--------|
| 76.33  | 301.57 | 80.266 | 280.26 |
| 76.285 | 301.74 | 80.221 | 280.43 |
| 76.263 | 301.91 | 80.169 | 280.6  |
| 76.209 | 302.08 | 80.132 | 280.77 |
| 76.175 | 302.25 | 80.098 | 280.94 |
| 76.13  | 302.42 | 80.063 | 281.11 |
| 76.088 | 302.59 | 80.029 | 281.28 |
| 76.049 | 302.76 | 79.977 | 281.45 |
| 76.02  | 302.93 | 79.95  | 281.62 |
| 75.978 | 303.1  | 79.91  | 281.79 |
| 75.933 | 303.27 | 79.873 | 281.96 |
| 75.891 | 303.44 | 79.834 | 282.13 |
| 75.865 | 303.61 | 79.799 | 282.3  |
| 75.817 | 303.78 | 79.759 | 282.47 |
| 75.778 | 303.95 | 79.725 | 282.64 |
| 75.73  | 304.12 | 79.698 | 282.81 |
| 75.699 | 304.29 | 79.663 | 282.98 |
| 75.657 | 304.46 | 79.624 | 283.15 |
| 75.612 | 304.63 | 79.577 | 283.32 |
| 75.583 | 304.8  | 79.54  | 283.49 |
| 75.536 | 304.97 | 79.525 | 283.66 |
| 75.513 | 305.14 | 79.485 | 283.83 |
| 75.479 | 305.31 | 79.443 | 284    |
| 75.448 | 305.48 | 79.409 | 284.17 |
| 75.397 | 305.65 | 79.364 | 284.34 |
| 75.366 | 305.82 | 79.342 | 284.51 |
| 75.316 | 305.99 | 79.315 | 284.68 |
| 75.299 | 306.16 | 79.258 | 284.85 |
| 75.254 | 306.33 | 79.228 | 285.02 |
| 75.211 | 306.5  | 79.201 | 285.19 |
| 75.175 | 306.67 | 79.167 | 285.36 |
| 75.121 | 306.84 | 79.132 | 285.53 |
| 75.113 | 307.01 | 79.097 | 285.7  |
| 75.073 | 307.18 | 79.063 | 285.87 |
| 75.039 | 307.35 | 79.026 | 286.04 |
| 74.989 | 307.52 | 79.011 | 286.21 |
| 74.961 | 307.69 | 78.966 | 286.37 |
| 74.915 | 307.86 | 78.934 | 286.54 |
| 74.887 | 308.03 | 78.892 | 286.71 |
| 74.859 | 308.2  | 78.873 | 286.88 |
| 74.82  | 308.37 | 78.831 | 287.05 |
| 74.794 | 308.54 | 78.796 | 287.22 |
| 74.752 | 308.71 | 78.761 | 287.39 |
| 74.727 | 308.88 | 78.727 | 287.56 |
| 74.693 | 309.05 | 78.682 | 287.73 |
| 74.653 | 309.22 | 78.658 | 287.9  |
| 74.605 | 309.39 | 78.638 | 288.07 |
| 74.566 | 309.56 | 78.598 | 288.24 |
| 74.557 | 309.73 | 78.564 | 288.41 |
| 74.515 | 309.9  | 78.532 | 288.58 |
| 74.49  | 310.07 | 78.505 | 288.75 |
| 74.45  | 310.24 | 78.477 | 288.92 |
| 74.405 | 310.41 | 78.45  | 289.09 |
| 74.397 | 310.58 | 78.416 | 289.26 |

|        |        |        |        |
|--------|--------|--------|--------|
| 74.349 | 310.75 | 78.379 | 289.43 |
| 74.321 | 310.92 | 78.351 | 289.6  |
| 74.278 | 311.09 | 78.332 | 289.77 |
| 74.247 | 311.26 | 78.29  | 289.94 |
| 74.219 | 311.43 | 78.253 | 290.11 |
| 74.177 | 311.6  | 78.22  | 290.28 |
| 74.146 | 311.77 | 78.188 | 290.45 |
| 74.109 | 311.94 | 78.166 | 290.62 |
| 74.092 | 312.11 | 78.137 | 290.79 |
| 74.044 | 312.28 | 78.099 | 290.96 |
| 74.028 | 312.45 | 78.07  | 291.13 |
| 73.991 | 312.62 | 78.045 | 291.3  |
| 73.954 | 312.79 | 78.023 | 291.47 |
| 73.926 | 312.96 | 77.988 | 291.64 |
| 73.895 | 313.13 | 77.944 | 291.81 |
| 73.87  | 313.3  | 77.914 | 291.98 |
| 73.841 | 313.47 | 77.885 | 292.15 |
| 73.816 | 313.64 | 77.87  | 292.32 |
| 73.779 | 313.82 | 77.835 | 292.49 |
| 73.754 | 313.99 | 77.813 | 292.66 |
| 73.726 | 314.16 | 77.788 | 292.83 |
| 73.689 | 314.33 | 77.751 | 293    |
| 73.672 | 314.5  | 77.717 | 293.17 |
| 73.63  | 314.67 | 77.692 | 293.34 |
| 73.596 | 314.84 | 77.667 | 293.51 |
| 73.571 | 315.01 | 77.64  | 293.68 |
| 73.543 | 315.18 | 77.605 | 293.85 |
| 73.523 | 315.35 | 77.573 | 294.02 |
| 73.489 | 315.52 | 77.549 | 294.19 |
| 73.458 | 315.69 | 77.529 | 294.36 |
| 73.433 | 315.86 | 77.494 | 294.53 |
| 73.399 | 316.03 | 77.465 | 294.7  |
| 73.365 | 316.2  | 77.43  | 294.87 |
| 73.343 | 316.37 | 77.395 | 295.04 |
| 73.317 | 316.54 | 77.378 | 295.21 |
| 73.283 | 316.71 | 77.358 | 295.38 |
| 73.255 | 316.88 | 77.329 | 295.55 |
| 73.233 | 317.05 | 77.297 | 295.72 |
| 73.21  | 317.22 | 77.269 | 295.89 |
| 73.188 | 317.4  | 77.255 | 296.06 |
| 73.157 | 317.57 | 77.218 | 296.23 |
| 73.12  | 317.74 | 77.183 | 296.4  |
| 73.097 | 317.91 | 77.153 | 296.57 |
| 73.066 | 318.08 | 77.124 | 296.74 |
| 73.044 | 318.25 | 77.104 | 296.91 |
| 73.016 | 318.42 | 77.079 | 297.08 |
| 72.993 | 318.59 | 77.05  | 297.25 |
| 72.968 | 318.76 | 77.015 | 297.42 |
| 72.931 | 318.93 | 76.995 | 297.59 |
| 72.903 | 319.1  | 76.976 | 297.76 |
| 72.889 | 319.27 | 76.956 | 297.93 |
| 72.866 | 319.44 | 76.921 | 298.1  |
| 72.832 | 319.61 | 76.889 | 298.27 |
| 72.801 | 319.79 | 76.864 | 298.44 |

|        |        |        |        |
|--------|--------|--------|--------|
| 72.779 | 319.96 | 76.84  | 298.61 |
| 72.756 | 320.13 | 76.815 | 298.78 |
| 72.734 | 320.3  | 76.8   | 298.95 |
| 72.697 | 320.47 | 76.763 | 299.12 |
| 72.669 | 320.64 | 76.736 | 299.29 |
| 72.655 | 320.81 | 76.711 | 299.46 |
| 72.638 | 320.98 | 76.689 | 299.63 |
| 72.621 | 321.15 | 76.669 | 299.8  |
| 72.587 | 321.32 | 76.645 | 299.97 |
| 72.562 | 321.49 | 76.61  | 300.14 |
| 72.539 | 321.66 | 76.588 | 300.31 |
| 72.517 | 321.84 | 76.568 | 300.48 |
| 72.491 | 322.01 | 76.538 | 300.65 |
| 72.472 | 322.18 | 76.509 | 300.82 |
| 72.432 | 322.35 | 76.477 | 300.99 |
| 72.412 | 322.52 | 76.457 | 301.15 |
| 72.393 | 322.69 | 76.432 | 301.32 |
| 72.376 | 322.86 | 76.402 | 301.49 |
| 72.362 | 323.03 | 76.375 | 301.66 |
| 72.333 | 323.2  | 76.351 | 301.83 |
| 72.3   | 323.37 | 76.326 | 302    |
| 72.28  | 323.54 | 76.311 | 302.17 |
| 72.263 | 323.72 | 76.279 | 302.34 |
| 72.238 | 323.89 | 76.249 | 302.51 |
| 72.212 | 324.06 | 76.225 | 302.68 |
| 72.192 | 324.23 | 76.202 | 302.85 |
| 72.164 | 324.4  | 76.173 | 303.02 |
| 72.159 | 324.57 | 76.15  | 303.19 |
| 72.136 | 324.74 | 76.118 | 303.36 |
| 72.088 | 324.91 | 76.096 | 303.53 |
| 72.077 | 325.08 | 76.071 | 303.7  |
| 72.054 | 325.25 | 76.059 | 303.87 |
| 72.035 | 325.42 | 76.027 | 304.04 |
| 72.012 | 325.6  | 76     | 304.21 |
| 71.995 | 325.77 | 75.973 | 304.38 |
| 71.978 | 325.94 | 75.958 | 304.55 |
| 71.95  | 326.11 | 75.931 | 304.72 |
| 71.93  | 326.28 | 75.916 | 304.89 |
| 71.908 | 326.45 | 75.881 | 305.06 |
| 71.885 | 326.62 | 75.857 | 305.23 |
| 71.868 | 326.79 | 75.839 | 305.4  |
| 71.849 | 326.96 | 75.815 | 305.57 |
| 71.826 | 327.14 | 75.797 | 305.74 |
| 71.812 | 327.31 | 75.777 | 305.91 |
| 71.792 | 327.48 | 75.745 | 306.08 |
| 71.772 | 327.65 | 75.718 | 306.25 |
| 71.747 | 327.82 | 75.703 | 306.42 |
| 71.73  | 327.99 | 75.674 | 306.59 |
| 71.71  | 328.16 | 75.642 | 306.76 |
| 71.691 | 328.33 | 75.617 | 306.93 |
| 71.668 | 328.5  | 75.597 | 307.1  |
| 71.643 | 328.67 | 75.575 | 307.27 |
| 71.626 | 328.84 | 75.56  | 307.44 |
| 71.617 | 329.02 | 75.535 | 307.61 |

|        |        |        |        |
|--------|--------|--------|--------|
| 71.586 | 329.19 | 75.508 | 307.78 |
| 71.572 | 329.36 | 75.474 | 307.95 |
| 71.555 | 329.53 | 75.454 | 308.12 |
| 71.53  | 329.7  | 75.437 | 308.29 |
| 71.51  | 329.87 | 75.409 | 308.46 |
| 71.491 | 330.04 | 75.385 | 308.63 |
| 71.476 | 330.21 | 75.367 | 308.8  |
| 71.46  | 330.38 | 75.345 | 308.97 |
| 71.443 | 330.55 | 75.323 | 309.14 |
| 71.423 | 330.72 | 75.298 | 309.31 |
| 71.406 | 330.89 | 75.274 | 309.49 |
| 71.386 | 331.06 | 75.251 | 309.66 |
| 71.372 | 331.24 | 75.234 | 309.83 |
| 71.35  | 331.41 | 75.217 | 310    |
| 71.324 | 331.58 | 75.187 | 310.17 |
| 71.316 | 331.75 | 75.165 | 310.34 |
| 71.299 | 331.92 | 75.135 | 310.51 |
| 71.274 | 332.09 | 75.118 | 310.68 |
| 71.254 | 332.26 | 75.093 | 310.85 |
| 71.231 | 332.43 | 75.071 | 311.02 |
| 71.217 | 332.6  | 75.041 | 311.19 |
| 71.2   | 332.77 | 75.027 | 311.36 |
| 71.189 | 332.94 | 75.019 | 311.53 |
| 71.175 | 333.11 | 74.994 | 311.7  |
| 71.158 | 333.28 | 74.972 | 311.87 |
| 71.138 | 333.45 | 74.94  | 312.04 |
| 71.127 | 333.62 | 74.923 | 312.21 |
| 71.107 | 333.79 | 74.891 | 312.38 |
| 71.087 | 333.96 | 74.868 | 312.55 |
| 71.071 | 334.13 | 74.844 | 312.72 |
| 71.051 | 334.3  | 74.824 | 312.89 |
| 71.037 | 334.48 | 74.809 | 313.06 |
| 71.02  | 334.65 | 74.787 | 313.23 |
| 71     | 334.82 | 74.765 | 313.4  |
| 70.98  | 334.99 | 74.745 | 313.57 |
| 70.969 | 335.16 | 74.713 | 313.74 |
| 70.958 | 335.33 | 74.705 | 313.91 |
| 70.941 | 335.5  | 74.673 | 314.08 |
| 70.921 | 335.67 | 74.663 | 314.25 |
| 70.904 | 335.84 | 74.639 | 314.42 |
| 70.885 | 336.01 | 74.614 | 314.59 |
| 70.873 | 336.18 | 74.589 | 314.76 |
| 70.862 | 336.35 | 74.572 | 314.93 |
| 70.837 | 336.52 | 74.547 | 315.1  |
| 70.817 | 336.69 | 74.523 | 315.28 |
| 70.806 | 336.86 | 74.505 | 315.45 |
| 70.789 | 337.03 | 74.488 | 315.62 |
| 70.775 | 337.2  | 74.463 | 315.79 |
| 70.761 | 337.37 | 74.441 | 315.96 |
| 70.744 | 337.54 | 74.411 | 316.13 |
| 70.73  | 337.71 | 74.397 | 316.3  |
| 70.71  | 337.88 | 74.377 | 316.47 |
| 70.693 | 338.06 | 74.355 | 316.64 |
| 70.682 | 338.23 | 74.332 | 316.81 |

|        |        |        |        |
|--------|--------|--------|--------|
| 70.665 | 338.4  | 74.313 | 316.98 |
| 70.639 | 338.57 | 74.283 | 317.15 |
| 70.631 | 338.74 | 74.268 | 317.32 |
| 70.625 | 338.91 | 74.253 | 317.49 |
| 70.608 | 339.08 | 74.229 | 317.66 |
| 70.589 | 339.25 | 74.209 | 317.83 |
| 70.574 | 339.42 | 74.192 | 318    |
| 70.56  | 339.59 | 74.172 | 318.17 |
| 70.549 | 339.76 | 74.145 | 318.34 |
| 70.529 | 339.93 | 74.13  | 318.51 |
| 70.518 | 340.1  | 74.105 | 318.68 |
| 70.501 | 340.27 | 74.078 | 318.85 |
| 70.476 | 340.44 | 74.053 | 319.02 |
| 70.465 | 340.61 | 74.036 | 319.19 |
| 70.45  | 340.78 | 74.016 | 319.37 |
| 70.436 | 340.96 | 73.992 | 319.54 |
| 70.417 | 341.13 | 73.979 | 319.71 |
| 70.4   | 341.3  | 73.952 | 319.88 |
| 70.388 | 341.47 | 73.935 | 320.05 |
| 70.372 | 341.64 | 73.913 | 320.22 |
| 70.355 | 341.81 | 73.888 | 320.39 |
| 70.341 | 341.98 | 73.863 | 320.56 |
| 70.321 | 342.15 | 73.848 | 320.73 |
| 70.307 | 342.32 | 73.831 | 320.9  |
| 70.298 | 342.49 | 73.806 | 321.07 |
| 70.284 | 342.66 | 73.789 | 321.24 |
| 70.27  | 342.83 | 73.777 | 321.41 |
| 70.25  | 343    | 73.747 | 321.58 |
| 70.236 | 343.17 | 73.725 | 321.75 |
| 70.216 | 343.34 | 73.707 | 321.93 |
| 70.205 | 343.51 | 73.695 | 322.1  |
| 70.191 | 343.68 | 73.658 | 322.27 |
| 70.174 | 343.85 | 73.633 | 322.44 |
| 70.16  | 344.03 | 73.616 | 322.61 |
| 70.152 | 344.2  | 73.604 | 322.78 |
| 70.132 | 344.37 | 73.586 | 322.95 |
| 70.118 | 344.54 | 73.567 | 323.12 |
| 70.101 | 344.71 | 73.547 | 323.29 |
| 70.087 | 344.88 | 73.525 | 323.46 |
| 70.076 | 345.05 | 73.502 | 323.63 |
| 70.064 | 345.22 | 73.485 | 323.8  |
| 70.042 | 345.39 | 73.465 | 323.97 |
| 70.03  | 345.56 | 73.451 | 324.14 |
| 70.025 | 345.73 | 73.436 | 324.32 |
| 70.011 | 345.9  | 73.411 | 324.49 |
| 69.994 | 346.07 | 73.389 | 324.66 |
| 69.977 | 346.24 | 73.374 | 324.83 |
| 69.96  | 346.42 | 73.354 | 325    |
| 69.949 | 346.59 | 73.325 | 325.17 |
| 69.932 | 346.76 | 73.312 | 325.34 |
| 69.918 | 346.93 | 73.285 | 325.51 |
| 69.904 | 347.1  | 73.263 | 325.68 |
| 69.89  | 347.27 | 73.241 | 325.85 |
| 69.873 | 347.44 | 73.228 | 326.02 |

|        |        |        |        |
|--------|--------|--------|--------|
| 69.858 | 347.61 | 73.211 | 326.19 |
| 69.847 | 347.78 | 73.184 | 326.37 |
| 69.833 | 347.95 | 73.164 | 326.54 |
| 69.819 | 348.12 | 73.147 | 326.71 |
| 69.794 | 348.29 | 73.129 | 326.88 |
| 69.771 | 348.46 | 73.115 | 327.05 |
| 69.76  | 348.64 | 73.085 | 327.22 |
| 69.751 | 348.81 | 73.068 | 327.39 |
| 69.737 | 348.98 | 73.048 | 327.56 |
| 69.723 | 349.15 | 73.026 | 327.73 |
| 69.709 | 349.32 | 73.001 | 327.9  |
| 69.692 | 349.49 | 72.991 | 328.07 |
| 69.681 | 349.66 | 72.966 | 328.24 |
| 69.672 | 349.83 | 72.942 | 328.41 |
| 69.661 | 350    | 72.924 | 328.58 |
| 69.65  | 350.17 | 72.91  | 328.75 |
| 69.63  | 350.35 | 72.887 | 328.92 |
| 69.613 | 350.52 | 72.878 | 329.1  |
| 69.599 | 350.69 | 72.848 | 329.27 |
| 69.591 | 350.86 | 72.828 | 329.44 |
| 69.571 | 351.03 | 72.818 | 329.61 |
| 69.56  | 351.2  | 72.798 | 329.78 |
| 69.54  | 351.37 | 72.771 | 329.95 |
| 69.523 | 351.54 | 72.754 | 330.12 |
| 69.509 | 351.71 | 72.732 | 330.29 |
| 69.501 | 351.88 | 72.71  | 330.46 |
| 69.492 | 352.06 | 72.697 | 330.63 |
| 69.475 | 352.23 | 72.67  | 330.8  |
| 69.455 | 352.4  | 72.643 | 330.97 |
| 69.438 | 352.57 | 72.626 | 331.14 |
| 69.427 | 352.74 | 72.613 | 331.31 |
| 69.419 | 352.91 | 72.588 | 331.48 |
| 69.402 | 353.08 | 72.571 | 331.65 |
| 69.385 | 353.25 | 72.542 | 331.82 |
| 69.371 | 353.42 | 72.532 | 331.99 |
| 69.362 | 353.59 | 72.512 | 332.16 |
| 69.348 | 353.76 | 72.497 | 332.33 |
| 69.329 | 353.93 | 72.47  | 332.51 |
| 69.312 | 354.11 | 72.445 | 332.68 |
| 69.3   | 354.28 | 72.425 | 332.85 |
| 69.289 | 354.45 | 72.406 | 333.02 |
| 69.281 | 354.62 | 72.379 | 333.19 |
| 69.267 | 354.79 | 72.364 | 333.36 |
| 69.247 | 354.96 | 72.341 | 333.53 |
| 69.236 | 355.13 | 72.319 | 333.7  |
| 69.221 | 355.3  | 72.295 | 333.87 |
| 69.207 | 355.47 | 72.28  | 334.04 |
| 69.19  | 355.64 | 72.26  | 334.21 |
| 69.182 | 355.81 | 72.238 | 334.38 |
| 69.171 | 355.98 | 72.208 | 334.55 |
| 69.154 | 356.15 | 72.188 | 334.72 |
| 69.145 | 356.33 | 72.169 | 334.89 |
| 69.131 | 356.5  | 72.151 | 335.06 |
| 69.112 | 356.67 | 72.127 | 335.23 |

|        |        |        |        |
|--------|--------|--------|--------|
| 69.095 | 356.84 | 72.109 | 335.4  |
| 69.083 | 357.01 | 72.082 | 335.57 |
| 69.072 | 357.18 | 72.07  | 335.74 |
| 69.061 | 357.35 | 72.043 | 335.91 |
| 69.041 | 357.52 | 72.018 | 336.08 |
| 69.024 | 357.69 | 72.006 | 336.25 |
| 69.013 | 357.86 | 71.976 | 336.42 |
| 69.002 | 358.03 | 71.959 | 336.59 |
| 68.987 | 358.21 | 71.944 | 336.76 |
| 68.971 | 358.38 | 71.922 | 336.93 |
| 68.956 | 358.55 | 71.894 | 337.1  |
| 68.942 | 358.72 | 71.877 | 337.27 |
| 68.928 | 358.89 | 71.85  | 337.44 |
| 68.914 | 359.06 | 71.825 | 337.61 |
| 68.9   | 359.23 | 71.808 | 337.78 |
| 68.889 | 359.4  | 71.791 | 337.95 |
| 68.875 | 359.57 | 71.768 | 338.12 |
| 68.861 | 359.74 | 71.746 | 338.29 |
| 68.852 | 359.91 | 71.714 | 338.46 |
| 68.835 | 360.08 | 71.697 | 338.63 |
| 68.81  | 360.26 | 71.682 | 338.81 |
| 68.799 | 360.43 | 71.657 | 338.98 |
| 68.787 | 360.6  | 71.633 | 339.15 |
| 68.779 | 360.77 | 71.598 | 339.32 |
| 68.768 | 360.94 | 71.578 | 339.49 |
| 68.751 | 361.11 | 71.561 | 339.66 |
| 68.734 | 361.28 | 71.536 | 339.83 |
| 68.728 | 361.45 | 71.511 | 340    |
| 68.711 | 361.62 | 71.479 | 340.17 |
| 68.694 | 361.79 | 71.457 | 340.34 |
| 68.675 | 361.96 | 71.447 | 340.51 |
| 68.663 | 362.14 | 71.423 | 340.68 |
| 68.655 | 362.31 | 71.393 | 340.85 |
| 68.644 | 362.48 | 71.358 | 341.02 |
| 68.627 | 362.65 | 71.336 | 341.19 |
| 68.607 | 362.82 | 71.321 | 341.36 |
| 68.596 | 362.99 | 71.304 | 341.53 |
| 68.584 | 363.16 | 71.272 | 341.7  |
| 68.573 | 363.33 | 71.245 | 341.87 |
| 68.559 | 363.5  | 71.22  | 342.04 |
| 68.539 | 363.67 | 71.19  | 342.21 |
| 68.525 | 363.84 | 71.173 | 342.38 |
| 68.514 | 364.02 | 71.151 | 342.55 |
| 68.5   | 364.19 | 71.121 | 342.72 |
| 68.486 | 364.36 | 71.094 | 342.89 |
| 68.469 | 364.53 | 71.079 | 343.07 |
| 68.449 | 364.7  | 71.055 | 343.24 |
| 68.435 | 364.87 | 71.03  | 343.41 |
| 68.421 | 365.04 | 70.995 | 343.58 |
| 68.404 | 365.21 | 70.978 | 343.75 |
| 68.398 | 365.38 | 70.953 | 343.92 |
| 68.384 | 365.55 | 70.929 | 344.09 |
| 68.373 | 365.72 | 70.899 | 344.26 |
| 68.359 | 365.9  | 70.874 | 344.43 |

|        |        |        |        |
|--------|--------|--------|--------|
| 68.342 | 366.07 | 70.849 | 344.6  |
| 68.325 | 366.24 | 70.83  | 344.77 |
| 68.311 | 366.41 | 70.807 | 344.94 |
| 68.294 | 366.58 | 70.78  | 345.11 |
| 68.283 | 366.75 | 70.743 | 345.28 |
| 68.272 | 366.92 | 70.716 | 345.45 |
| 68.255 | 367.09 | 70.694 | 345.62 |
| 68.235 | 367.26 | 70.674 | 345.79 |
| 68.224 | 367.43 | 70.652 | 345.96 |
| 68.209 | 367.6  | 70.615 | 346.14 |
| 68.19  | 367.77 | 70.58  | 346.31 |
| 68.178 | 367.94 | 70.56  | 346.48 |
| 68.17  | 368.12 | 70.548 | 346.65 |
| 68.147 | 368.29 | 70.511 | 346.82 |
| 68.131 | 368.46 | 70.486 | 346.99 |
| 68.114 | 368.63 | 70.444 | 347.16 |
| 68.102 | 368.8  | 70.427 | 347.33 |
| 68.083 | 368.97 | 70.41  | 347.5  |
| 68.069 | 369.14 | 70.385 | 347.67 |
| 68.057 | 369.31 | 70.351 | 347.84 |
| 68.046 | 369.48 | 70.318 | 348.01 |
| 68.029 | 369.65 | 70.286 | 348.18 |
| 68.012 | 369.82 | 70.276 | 348.35 |
| 67.998 | 369.99 | 70.259 | 348.52 |
| 67.984 | 370.16 | 70.232 | 348.69 |
| 67.97  | 370.33 | 70.192 | 348.87 |
| 67.959 | 370.51 | 70.155 | 349.04 |
| 67.942 | 370.68 | 70.145 | 349.21 |
| 67.925 | 370.85 | 70.113 | 349.38 |
| 67.905 | 371.02 | 70.079 | 349.55 |
| 67.891 | 371.19 | 70.052 | 349.72 |
| 67.883 | 371.36 | 70.027 | 349.89 |
| 67.863 | 371.53 | 70.005 | 350.06 |
| 67.846 | 371.7  | 69.985 | 350.23 |
| 67.826 | 371.87 | 69.958 | 350.4  |
| 67.812 | 372.04 | 69.921 | 350.57 |
| 67.798 | 372.21 | 69.894 | 350.74 |
| 67.787 | 372.38 | 69.879 | 350.91 |
| 67.767 | 372.55 | 69.849 | 351.08 |
| 67.75  | 372.72 | 69.829 | 351.25 |
| 67.739 | 372.89 | 69.792 | 351.42 |
| 67.719 | 373.06 | 69.763 | 351.6  |
| 67.696 | 373.24 | 69.735 | 351.77 |
| 67.677 | 373.41 | 69.711 | 351.94 |
| 67.657 | 373.58 | 69.691 | 352.11 |
| 67.643 | 373.75 | 69.654 | 352.28 |
| 67.637 | 373.92 | 69.622 | 352.45 |
| 67.623 | 374.09 | 69.6   | 352.62 |
| 67.603 | 374.26 | 69.582 | 352.79 |
| 67.589 | 374.43 | 69.555 | 352.96 |
| 67.572 | 374.6  | 69.518 | 353.13 |
| 67.556 | 374.77 | 69.486 | 353.3  |
| 67.539 | 374.94 | 69.461 | 353.47 |
| 67.522 | 375.11 | 69.434 | 353.65 |



|        |        |        |        |
|--------|--------|--------|--------|
| 67.505 | 375.28 | 69.412 | 353.82 |
| 67.485 | 375.45 | 69.387 | 353.99 |
| 67.477 | 375.62 | 69.348 | 354.16 |
| 67.46  | 375.79 | 69.325 | 354.33 |
| 67.44  | 375.96 | 69.306 | 354.5  |
| 67.417 | 376.13 | 69.286 | 354.67 |
| 67.403 | 376.3  | 69.251 | 354.84 |
| 67.386 | 376.47 | 69.217 | 355.01 |
| 67.369 | 376.64 | 69.192 | 355.18 |
| 67.344 | 376.81 | 69.172 | 355.35 |
| 67.319 | 376.99 | 69.148 | 355.52 |
| 67.305 | 377.16 | 69.12  | 355.69 |
| 67.299 | 377.33 | 69.091 | 355.87 |
| 67.288 | 377.5  | 69.061 | 356.04 |
| 67.271 | 377.67 | 69.041 | 356.21 |
| 67.251 | 377.84 | 69.024 | 356.38 |
| 67.229 | 378.01 | 68.992 | 356.55 |
| 67.209 | 378.18 | 68.955 | 356.72 |
| 67.203 | 378.35 | 68.928 | 356.89 |
| 67.192 | 378.52 | 68.905 | 357.06 |
| 67.169 | 378.69 | 68.883 | 357.23 |
| 67.152 | 378.86 | 68.863 | 357.4  |
| 67.133 | 379.03 | 68.817 | 357.57 |
| 67.121 | 379.2  | 68.792 | 357.74 |
| 67.102 | 379.37 | 68.775 | 357.91 |
| 67.082 | 379.54 | 68.752 | 358.08 |
| 67.068 | 379.71 | 68.725 | 358.25 |
| 67.051 | 379.88 | 68.688 | 358.42 |
| 67.034 | 380.05 | 68.661 | 358.59 |
| 67.009 | 380.22 | 68.639 | 358.76 |
| 66.997 | 380.39 | 68.619 | 358.94 |
| 66.978 | 380.56 | 68.587 | 359.11 |
| 66.966 | 380.73 | 68.565 | 359.28 |
| 66.947 | 380.9  | 68.532 | 359.45 |
| 66.927 | 381.07 | 68.51  | 359.62 |
| 66.904 | 381.24 | 68.495 | 359.79 |
| 66.893 | 381.41 | 68.463 | 359.96 |
| 66.871 | 381.58 | 68.426 | 360.13 |
| 66.842 | 381.75 | 68.402 | 360.3  |
| 66.823 | 381.92 | 68.379 | 360.47 |
| 66.806 | 382.09 | 68.364 | 360.64 |
| 66.786 | 382.26 | 68.345 | 360.81 |
| 66.775 | 382.43 | 68.305 | 360.98 |
| 66.766 | 382.6  | 68.283 | 361.15 |
| 66.747 | 382.77 | 68.261 | 361.33 |
| 66.727 | 382.94 | 68.241 | 361.5  |
| 66.704 | 383.11 | 68.219 | 361.67 |
| 66.687 | 383.28 | 68.199 | 361.84 |
| 66.673 | 383.45 | 68.164 | 362.01 |
| 66.659 | 383.62 | 68.135 | 362.18 |
| 66.642 | 383.79 | 68.12  | 362.35 |
| 66.617 | 383.96 | 68.098 | 362.52 |
| 66.603 | 384.13 | 68.073 | 362.69 |
| 66.589 | 384.3  | 68.031 | 362.86 |

|        |        |        |        |
|--------|--------|--------|--------|
| 66.58  | 384.47 | 68.006 | 363.03 |
| 66.56  | 384.64 | 67.994 | 363.2  |
| 66.541 | 384.81 | 67.974 | 363.37 |
| 66.515 | 384.98 | 67.945 | 363.54 |
| 66.498 | 385.15 | 67.912 | 363.71 |
| 66.479 | 385.32 | 67.878 | 363.88 |
| 66.459 | 385.49 | 67.868 | 364.05 |
| 66.442 | 385.66 | 67.853 | 364.22 |
| 66.425 | 385.83 | 67.816 | 364.4  |
| 66.417 | 386    | 67.782 | 364.57 |
| 66.394 | 386.18 | 67.767 | 364.74 |
| 66.377 | 386.34 | 67.742 | 364.91 |
| 66.352 | 386.51 | 67.722 | 365.08 |
| 66.341 | 386.68 | 67.698 | 365.25 |
| 66.324 | 386.85 | 67.68  | 365.42 |
| 66.31  | 387.02 | 67.658 | 365.59 |
| 66.287 | 387.19 | 67.641 | 365.76 |
| 66.279 | 387.36 | 67.614 | 365.93 |
| 66.259 | 387.53 | 67.591 | 366.1  |
| 66.234 | 387.7  | 67.569 | 366.27 |
| 66.222 | 387.87 | 67.532 | 366.44 |
| 66.208 | 388.04 | 67.517 | 366.61 |
| 66.18  | 388.21 | 67.497 | 366.78 |
| 66.16  | 388.38 | 67.48  | 366.95 |
| 66.146 | 388.55 | 67.453 | 367.12 |
| 66.124 | 388.72 | 67.433 | 367.29 |
| 66.104 | 388.89 | 67.409 | 367.46 |
| 66.09  | 389.06 | 67.386 | 367.64 |
| 66.073 | 389.23 | 67.376 | 367.81 |
| 66.053 | 389.4  | 67.349 | 367.98 |
| 66.036 | 389.57 | 67.325 | 368.15 |
| 66.022 | 389.74 | 67.305 | 368.32 |
| 66.005 | 389.91 | 67.285 | 368.49 |
| 65.985 | 390.08 | 67.26  | 368.66 |
| 65.966 | 390.25 | 67.243 | 368.83 |
| 65.949 | 390.42 | 67.223 | 369    |
| 65.938 | 390.59 | 67.204 | 369.17 |
| 65.912 | 390.76 | 67.176 | 369.34 |
| 65.892 | 390.93 | 67.159 | 369.51 |
| 65.876 | 391.1  | 67.139 | 369.68 |
| 65.864 | 391.27 | 67.122 | 369.85 |
| 65.845 | 391.44 | 67.095 | 370.02 |
| 65.822 | 391.61 | 67.078 | 370.19 |
| 65.802 | 391.78 | 67.06  | 370.36 |
| 65.78  | 391.95 | 67.038 | 370.53 |
| 65.76  | 392.12 | 67.018 | 370.7  |
| 65.743 | 392.29 | 67.003 | 370.87 |
| 65.72  | 392.46 | 66.984 | 371.05 |
| 65.701 | 392.63 | 66.966 | 371.22 |
| 65.689 | 392.8  | 66.944 | 371.39 |
| 65.673 | 392.97 | 66.934 | 371.56 |
| 65.656 | 393.14 | 66.907 | 371.73 |
| 65.639 | 393.31 | 66.88  | 371.9  |
| 65.616 | 393.48 | 66.863 | 372.07 |

|        |        |        |        |
|--------|--------|--------|--------|
| 65.599 | 393.64 | 66.838 | 372.24 |
| 65.588 | 393.81 | 66.826 | 372.41 |
| 65.571 | 393.98 | 66.796 | 372.58 |
| 65.546 | 394.15 | 66.779 | 372.75 |
| 65.526 | 394.32 | 66.766 | 372.92 |
| 65.515 | 394.49 | 66.749 | 373.09 |
| 65.498 | 394.66 | 66.722 | 373.26 |
| 65.481 | 394.83 | 66.709 | 373.43 |
| 65.472 | 395    | 66.695 | 373.6  |
| 65.447 | 395.17 | 66.68  | 373.77 |
| 65.419 | 395.34 | 66.658 | 373.94 |
| 65.405 | 395.51 | 66.635 | 374.12 |
| 65.394 | 395.68 | 66.621 | 374.29 |
| 65.368 | 395.85 | 66.598 | 374.46 |
| 65.351 | 396.02 | 66.581 | 374.63 |
| 65.334 | 396.19 | 66.566 | 374.8  |
| 65.32  | 396.36 | 66.539 | 374.97 |
| 65.292 | 396.53 | 66.522 | 375.14 |
| 65.267 | 396.7  | 66.509 | 375.31 |
| 65.25  | 396.87 | 66.495 | 375.48 |
| 65.233 | 397.04 | 66.467 | 375.65 |
| 65.222 | 397.21 | 66.448 | 375.82 |
| 65.207 | 397.37 | 66.43  | 375.99 |
| 65.188 | 397.54 | 66.418 | 376.16 |
| 65.162 | 397.71 | 66.406 | 376.33 |
| 65.151 | 397.88 | 66.383 | 376.5  |
| 65.143 | 398.05 | 66.371 | 376.67 |
| 65.123 | 398.22 | 66.351 | 376.84 |
| 65.103 | 398.39 | 66.334 | 377.01 |
| 65.083 | 398.56 | 66.312 | 377.18 |
| 65.069 | 398.73 | 66.29  | 377.35 |
| 65.05  | 398.9  | 66.275 | 377.52 |
| 65.033 | 399.07 | 66.257 | 377.69 |
| 65.013 | 399.24 | 66.238 | 377.87 |
| 64.993 | 399.41 | 66.215 | 378.04 |
| 64.974 | 399.58 | 66.203 | 378.21 |
| 64.959 | 399.75 | 66.181 | 378.38 |
| 64.94  | 399.91 | 66.159 | 378.55 |
| 64.923 | 400.08 | 66.139 | 378.72 |
| 64.903 | 400.25 | 66.127 | 378.89 |
| 64.883 | 400.42 | 66.104 | 379.06 |
| 64.866 | 400.59 | 66.085 | 379.23 |
| 64.849 | 400.76 | 66.065 | 379.4  |
| 64.83  | 400.93 | 66.035 | 379.57 |
| 64.816 | 401.1  | 66.028 | 379.74 |
| 64.799 | 401.27 | 66.013 | 379.91 |
| 64.779 | 401.44 | 65.991 | 380.08 |
| 64.756 | 401.61 | 65.973 | 380.25 |
| 64.734 | 401.78 | 65.954 | 380.42 |
| 64.72  | 401.95 | 65.936 | 380.59 |
| 64.706 | 402.12 | 65.929 | 380.76 |
| 64.689 | 402.29 | 65.904 | 380.93 |
| 64.672 | 402.45 | 65.872 | 381.1  |
| 64.661 | 402.62 | 65.855 | 381.27 |

|        |        |        |        |
|--------|--------|--------|--------|
| 64.63  | 402.79 | 65.842 | 381.44 |
| 64.61  | 402.96 | 65.815 | 381.61 |
| 64.593 | 403.13 | 65.805 | 381.78 |
| 64.568 | 403.3  | 65.781 | 381.95 |
| 64.556 | 403.47 | 65.761 | 382.12 |
| 64.537 | 403.64 | 65.744 | 382.29 |
| 64.52  | 403.81 | 65.724 | 382.46 |
| 64.5   | 403.98 | 65.707 | 382.63 |
| 64.483 | 404.15 | 65.687 | 382.8  |
| 64.46  | 404.32 | 65.667 | 382.97 |
| 64.441 | 404.49 | 65.652 | 383.14 |
| 64.427 | 404.66 | 65.63  | 383.31 |
| 64.404 | 404.82 | 65.613 | 383.48 |
| 64.382 | 404.99 | 65.588 | 383.65 |
| 64.367 | 405.16 | 65.568 | 383.82 |
| 64.362 | 405.33 | 65.563 | 383.99 |
| 64.348 | 405.5  | 65.546 | 384.16 |
| 64.325 | 405.67 | 65.524 | 384.33 |
| 64.303 | 405.84 | 65.499 | 384.5  |
| 64.274 | 406.01 | 65.487 | 384.67 |
| 64.26  | 406.18 | 65.465 | 384.85 |
| 64.246 | 406.35 | 65.445 | 385.02 |
| 64.232 | 406.52 | 65.425 | 385.19 |
| 64.201 | 406.69 | 65.413 | 385.36 |
| 64.176 | 406.86 | 65.398 | 385.53 |
| 64.162 | 407.03 | 65.381 | 385.7  |
| 64.139 | 407.19 | 65.358 | 385.87 |
| 64.122 | 407.36 | 65.336 | 386.04 |
| 64.102 | 407.53 | 65.316 | 386.21 |
| 64.091 | 407.7  | 65.299 | 386.38 |
| 64.063 | 407.87 | 65.282 | 386.55 |
| 64.043 | 408.04 | 65.262 | 386.72 |
| 64.021 | 408.21 | 65.242 | 386.89 |
| 64.004 | 408.38 | 65.22  | 387.06 |
| 63.987 | 408.55 | 65.198 | 387.23 |
| 63.967 | 408.72 | 65.183 | 387.4  |
| 63.947 | 408.89 | 65.168 | 387.57 |
| 63.931 | 409.06 | 65.148 | 387.74 |
| 63.914 | 409.23 | 65.129 | 387.91 |
| 63.894 | 409.39 | 65.109 | 388.08 |
| 63.88  | 409.56 | 65.092 | 388.25 |
| 63.846 | 409.73 | 65.064 | 388.42 |
| 63.832 | 409.9  | 65.042 | 388.59 |
| 63.818 | 410.07 | 65.025 | 388.76 |
| 63.792 | 410.24 | 65.008 | 388.93 |
| 63.773 | 410.41 | 64.988 | 389.1  |
| 63.761 | 410.58 | 64.968 | 389.27 |
| 63.739 | 410.75 | 64.946 | 389.44 |
| 63.716 | 410.92 | 64.931 | 389.61 |
| 63.694 | 411.09 | 64.904 | 389.78 |
| 63.688 | 411.26 | 64.874 | 389.95 |
| 63.663 | 411.43 | 64.852 | 390.12 |
| 63.64  | 411.59 | 64.83  | 390.29 |
| 63.62  | 411.76 | 64.81  | 390.46 |

|        |        |        |        |
|--------|--------|--------|--------|
| 63.604 | 411.93 | 64.79  | 390.63 |
| 63.573 | 412.1  | 64.768 | 390.8  |
| 63.553 | 412.27 | 64.738 | 390.97 |
| 63.539 | 412.44 | 64.719 | 391.14 |
| 63.522 | 412.61 | 64.704 | 391.31 |
| 63.499 | 412.78 | 64.674 | 391.48 |
| 63.471 | 412.95 | 64.649 | 391.65 |
| 63.446 | 413.12 | 64.62  | 391.82 |
| 63.432 | 413.28 | 64.602 | 391.99 |
| 63.412 | 413.45 | 64.585 | 392.16 |
| 63.392 | 413.62 | 64.563 | 392.33 |
| 63.372 | 413.79 | 64.531 | 392.5  |
| 63.347 | 413.96 | 64.513 | 392.67 |
| 63.325 | 414.13 | 64.494 | 392.84 |
| 63.302 | 414.3  | 64.469 | 393.01 |
| 63.277 | 414.47 | 64.434 | 393.18 |
| 63.251 | 414.64 | 64.41  | 393.35 |
| 63.229 | 414.81 | 64.383 | 393.52 |
| 63.209 | 414.98 | 64.368 | 393.69 |
| 63.184 | 415.14 | 64.338 | 393.86 |
| 63.161 | 415.31 | 64.311 | 394.03 |
| 63.138 | 415.48 | 64.284 | 394.2  |
| 63.11  | 415.65 | 64.257 | 394.37 |
| 63.093 | 415.82 | 64.229 | 394.54 |
| 63.065 | 415.99 | 64.215 | 394.71 |
| 63.048 | 416.16 | 64.18  | 394.88 |
| 63.017 | 416.33 | 64.143 | 395.05 |
| 63.006 | 416.5  | 64.123 | 395.22 |
| 62.975 | 416.67 | 64.096 | 395.39 |
| 62.952 | 416.84 | 64.076 | 395.55 |
| 62.924 | 417    | 64.052 | 395.72 |
| 62.907 | 417.17 | 64.022 | 395.89 |
| 62.882 | 417.34 | 63.987 | 396.06 |
| 62.851 | 417.51 | 63.968 | 396.23 |
| 62.828 | 417.68 | 63.948 | 396.4  |
| 62.803 | 417.85 | 63.918 | 396.57 |
| 62.778 | 418.02 | 63.879 | 396.74 |
| 62.747 | 418.19 | 63.854 | 396.91 |
| 62.718 | 418.36 | 63.839 | 397.08 |
| 62.69  | 418.53 | 63.81  | 397.25 |
| 62.673 | 418.69 | 63.777 | 397.42 |
| 62.645 | 418.86 | 63.74  | 397.59 |
| 62.623 | 419.03 | 63.716 | 397.76 |
| 62.586 | 419.2  | 63.703 | 397.93 |
| 62.547 | 419.37 | 63.669 | 398.1  |
| 62.541 | 419.54 | 63.646 | 398.27 |
| 62.513 | 419.71 | 63.619 | 398.44 |
| 62.479 | 419.88 | 63.595 | 398.61 |
| 62.439 | 420.05 | 63.575 | 398.78 |
| 62.414 | 420.21 | 63.555 | 398.95 |
| 62.403 | 420.38 | 63.52  | 399.12 |
| 62.372 | 420.55 | 63.488 | 399.29 |
| 62.332 | 420.72 | 63.469 | 399.46 |
| 62.304 | 420.89 | 63.441 | 399.63 |

|        |        |        |        |
|--------|--------|--------|--------|
| 62.265 | 421.06 | 63.427 | 399.8  |
| 62.234 | 421.23 | 63.395 | 399.97 |
| 62.217 | 421.4  | 63.362 | 400.14 |
| 62.183 | 421.57 | 63.333 | 400.31 |
| 62.152 | 421.73 | 63.303 | 400.48 |
| 62.121 | 421.9  | 63.286 | 400.65 |
| 62.09  | 422.07 | 63.259 | 400.82 |
| 62.07  | 422.24 | 63.231 | 400.99 |
| 62.042 | 422.41 | 63.202 | 401.16 |
| 62     | 422.58 | 63.177 | 401.33 |
| 61.963 | 422.75 | 63.155 | 401.49 |
| 61.949 | 422.92 | 63.145 | 401.66 |
| 61.921 | 423.09 | 63.11  | 401.83 |
| 61.893 | 423.25 | 63.071 | 402    |
| 61.856 | 423.42 | 63.046 | 402.17 |
| 61.825 | 423.59 | 63.024 | 402.34 |
| 61.805 | 423.76 | 62.997 | 402.51 |
| 61.788 | 423.93 | 62.975 | 402.68 |
| 61.754 | 424.1  | 62.945 | 402.85 |
| 61.723 | 424.27 | 62.92  | 403.02 |
| 61.684 | 424.44 | 62.896 | 403.19 |
| 61.656 | 424.61 | 62.868 | 403.36 |
| 61.633 | 424.77 | 62.839 | 403.53 |
| 61.605 | 424.94 | 62.809 | 403.7  |
| 61.571 | 425.11 | 62.792 | 403.87 |
| 61.532 | 425.28 | 62.762 | 404.04 |
| 61.509 | 425.45 | 62.742 | 404.21 |
| 61.489 | 425.62 | 62.708 | 404.38 |
| 61.458 | 425.79 | 62.683 | 404.55 |
| 61.433 | 425.96 | 62.646 | 404.72 |
| 61.391 | 426.13 | 62.634 | 404.89 |
| 61.36  | 426.29 | 62.616 | 405.06 |
| 61.34  | 426.46 | 62.584 | 405.23 |
| 61.312 | 426.63 | 62.56  | 405.39 |
| 61.278 | 426.8  | 62.532 | 405.56 |
| 61.244 | 426.97 | 62.503 | 405.73 |
| 61.213 | 427.14 | 62.483 | 405.9  |
| 61.188 | 427.31 | 62.458 | 406.07 |
| 61.165 | 427.48 | 62.424 | 406.24 |
| 61.14  | 427.65 | 62.397 | 406.41 |
| 61.103 | 427.82 | 62.369 | 406.58 |
| 61.078 | 427.99 | 62.34  | 406.75 |
| 61.061 | 428.16 | 62.322 | 406.92 |
| 61.027 | 428.32 | 62.293 | 407.09 |
| 61.002 | 428.49 | 62.266 | 407.26 |
| 60.962 | 428.66 | 62.241 | 407.43 |
| 60.931 | 428.83 | 62.219 | 407.6  |
| 60.914 | 429    | 62.184 | 407.77 |
| 60.9   | 429.17 | 62.162 | 407.94 |
| 60.867 | 429.34 | 62.125 | 408.11 |
| 60.83  | 429.51 | 62.088 | 408.28 |
| 60.796 | 429.68 | 62.07  | 408.45 |
| 60.779 | 429.85 | 62.043 | 408.61 |
| 60.759 | 430.02 | 62.014 | 408.78 |

|        |        |        |        |
|--------|--------|--------|--------|
| 60.726 | 430.19 | 61.982 | 408.95 |
| 60.689 | 430.36 | 61.964 | 409.12 |
| 60.647 | 430.53 | 61.945 | 409.29 |
| 60.624 | 430.7  | 61.927 | 409.46 |
| 60.613 | 430.87 | 61.888 | 409.63 |
| 60.579 | 431.04 | 61.858 | 409.8  |
| 60.548 | 431.21 | 61.823 | 409.97 |
| 60.52  | 431.38 | 61.809 | 410.14 |
| 60.492 | 431.55 | 61.779 | 410.31 |
| 60.475 | 431.72 | 61.747 | 410.48 |
| 60.449 | 431.89 | 61.712 | 410.65 |
| 60.413 | 432.06 | 61.69  | 410.82 |
| 60.376 | 432.23 | 61.665 | 410.99 |
| 60.353 | 432.4  | 61.643 | 411.15 |
| 60.334 | 432.57 | 61.618 | 411.32 |
| 60.314 | 432.74 | 61.591 | 411.49 |
| 60.275 | 432.92 | 61.564 | 411.66 |
| 60.255 | 433.09 | 61.532 | 411.83 |
| 60.215 | 433.26 | 61.502 | 412    |
| 60.193 | 433.43 | 61.48  | 412.17 |
| 60.17  | 433.6  | 61.453 | 412.34 |
| 60.145 | 433.77 | 61.421 | 412.51 |
| 60.12  | 433.94 | 61.396 | 412.68 |
| 60.097 | 434.11 | 61.381 | 412.85 |
| 60.066 | 434.28 | 61.337 | 413.02 |
| 60.049 | 434.45 | 61.305 | 413.19 |
| 60.007 | 434.62 | 61.283 | 413.36 |
| 59.981 | 434.79 | 61.263 | 413.53 |
| 59.942 | 434.96 | 61.236 | 413.7  |
| 59.922 | 435.13 | 61.213 | 413.87 |
| 59.9   | 435.3  | 61.181 | 414.03 |
| 59.877 | 435.47 | 61.152 | 414.2  |
| 59.852 | 435.64 | 61.127 | 414.37 |
| 59.824 | 435.82 | 61.112 | 414.54 |
| 59.798 | 435.99 | 61.082 | 414.71 |
| 59.77  | 436.16 | 61.048 | 414.88 |
| 59.75  | 436.33 | 61.018 | 415.05 |
| 59.731 | 436.5  | 60.994 | 415.22 |
| 59.705 | 436.67 | 60.974 | 415.39 |
| 59.68  | 436.84 | 60.944 | 415.56 |
| 59.652 | 437.01 | 60.924 | 415.73 |
| 59.635 | 437.18 | 60.89  | 415.9  |
| 59.609 | 437.35 | 60.863 | 416.07 |
| 59.578 | 437.52 | 60.833 | 416.24 |
| 59.55  | 437.69 | 60.818 | 416.4  |
| 59.53  | 437.87 | 60.779 | 416.57 |
| 59.488 | 438.04 | 60.751 | 416.74 |
| 59.477 | 438.21 | 60.729 | 416.91 |
| 59.443 | 438.38 | 60.712 | 417.08 |
| 59.42  | 438.55 | 60.695 | 417.25 |
| 59.389 | 438.72 | 60.658 | 417.42 |
| 59.364 | 438.89 | 60.628 | 417.59 |
| 59.344 | 439.06 | 60.606 | 417.76 |
| 59.316 | 439.23 | 60.588 | 417.93 |

|        |        |        |        |
|--------|--------|--------|--------|
| 59.296 | 439.4  | 60.559 | 418.1  |
| 59.268 | 439.57 | 60.539 | 418.27 |
| 59.237 | 439.74 | 60.507 | 418.44 |
| 59.212 | 439.92 | 60.485 | 418.61 |
| 59.192 | 440.09 | 60.467 | 418.77 |
| 59.161 | 440.26 | 60.44  | 418.94 |
| 59.141 | 440.43 | 60.418 | 419.11 |
| 59.124 | 440.6  | 60.381 | 419.28 |
| 59.099 | 440.77 | 60.359 | 419.45 |
| 59.077 | 440.94 | 60.344 | 419.62 |
| 59.043 | 441.11 | 60.322 | 419.79 |
| 59.009 | 441.28 | 60.297 | 419.96 |
| 58.989 | 441.45 | 60.272 | 420.13 |
| 58.969 | 441.62 | 60.245 | 420.3  |
| 58.941 | 441.8  | 60.223 | 420.47 |
| 58.919 | 441.97 | 60.196 | 420.64 |
| 58.888 | 442.14 | 60.176 | 420.81 |
| 58.862 | 442.31 | 60.164 | 420.97 |
| 58.843 | 442.48 | 60.134 | 421.14 |
| 58.826 | 442.65 | 60.102 | 421.31 |
| 58.8   | 442.82 | 60.097 | 421.48 |
| 58.775 | 442.99 | 60.075 | 421.65 |
| 58.75  | 443.16 | 60.055 | 421.82 |
| 58.721 | 443.33 | 60.028 | 421.99 |
| 58.69  | 443.5  | 60.003 | 422.16 |
| 58.682 | 443.68 | 59.983 | 422.33 |
| 58.659 | 443.85 | 59.966 | 422.5  |
| 58.645 | 444.02 | 59.944 | 422.66 |
| 58.62  | 444.19 | 59.914 | 422.83 |
| 58.592 | 444.36 | 59.894 | 423    |
| 58.569 | 444.53 | 59.87  | 423.17 |
| 58.544 | 444.7  | 59.857 | 423.34 |
| 58.524 | 444.87 | 59.837 | 423.51 |
| 58.496 | 445.04 | 59.81  | 423.68 |
| 58.476 | 445.21 | 59.798 | 423.85 |
| 58.451 | 445.38 | 59.771 | 424.02 |
| 58.431 | 445.56 | 59.756 | 424.19 |
| 58.417 | 445.73 | 59.734 | 424.36 |
| 58.397 | 445.9  | 59.709 | 424.52 |
| 58.372 | 446.07 | 59.694 | 424.69 |
| 58.341 | 446.24 | 59.672 | 424.86 |
| 58.332 | 446.41 | 59.652 | 425.03 |
| 58.31  | 446.58 | 59.642 | 425.2  |
| 58.284 | 446.75 | 59.623 | 425.37 |
| 58.262 | 446.92 | 59.6   | 425.54 |
| 58.237 | 447.09 | 59.586 | 425.71 |
| 58.214 | 447.27 | 59.563 | 425.88 |
| 58.197 | 447.44 | 59.546 | 426.05 |
| 58.18  | 447.61 | 59.529 | 426.22 |
| 58.155 | 447.78 | 59.514 | 426.39 |
| 58.132 | 447.95 | 59.489 | 426.56 |
| 58.11  | 448.12 | 59.472 | 426.72 |
| 58.09  | 448.29 | 59.45  | 426.89 |
| 58.07  | 448.46 | 59.435 | 427.06 |



|        |        |        |        |
|--------|--------|--------|--------|
| 58.042 | 448.63 | 59.42  | 427.23 |
| 58.025 | 448.81 | 59.405 | 427.4  |
| 58.003 | 448.98 | 59.385 | 427.57 |
| 57.988 | 449.15 | 59.373 | 427.74 |
| 57.972 | 449.32 | 59.351 | 427.91 |
| 57.952 | 449.49 | 59.329 | 428.08 |
| 57.921 | 449.66 | 59.311 | 428.25 |
| 57.912 | 449.83 | 59.299 | 428.42 |
| 57.895 | 450    | 59.282 | 428.59 |
| 57.873 | 450.17 | 59.262 | 428.76 |
| 57.859 | 450.34 | 59.247 | 428.93 |
| 57.842 | 450.51 | 59.227 | 429.1  |
| 57.828 | 450.68 | 59.217 | 429.27 |
| 57.814 | 450.86 | 59.193 | 429.44 |
| 57.78  | 451.03 | 59.178 | 429.61 |
| 57.763 | 451.2  | 59.163 | 429.78 |
| 57.746 | 451.37 | 59.143 | 429.95 |
| 57.729 | 451.54 | 59.129 | 430.12 |
| 57.712 | 451.71 | 59.106 | 430.29 |
| 57.69  | 451.88 | 59.089 | 430.46 |
| 57.678 | 452.05 | 59.077 | 430.63 |
| 57.662 | 452.22 | 59.067 | 430.8  |
| 57.642 | 452.39 | 59.047 | 430.97 |
| 57.619 | 452.56 | 59.032 | 431.14 |
| 57.6   | 452.73 | 59.012 | 431.31 |
| 57.588 | 452.91 | 58.995 | 431.48 |
| 57.577 | 453.08 | 58.983 | 431.65 |
| 57.557 | 453.25 | 58.97  | 431.82 |
| 57.532 | 453.42 | 58.951 | 431.99 |
| 57.515 | 453.59 | 58.926 | 432.16 |
| 57.501 | 453.76 | 58.921 | 432.33 |
| 57.484 | 453.93 | 58.914 | 432.51 |
| 57.47  | 454.1  | 58.894 | 432.68 |
| 57.447 | 454.27 | 58.877 | 432.85 |
| 57.43  | 454.44 | 58.862 | 433.02 |
| 57.416 | 454.62 | 58.847 | 433.19 |
| 57.399 | 454.79 | 58.835 | 433.36 |
| 57.391 | 454.96 | 58.822 | 433.53 |
| 57.368 | 455.13 | 58.802 | 433.7  |
| 57.357 | 455.3  | 58.793 | 433.87 |
| 57.346 | 455.47 | 58.773 | 434.04 |
| 57.332 | 455.64 | 58.758 | 434.21 |
| 57.32  | 455.81 | 58.746 | 434.38 |
| 57.306 | 455.98 | 58.728 | 434.55 |
| 57.281 | 456.15 | 58.714 | 434.72 |
| 57.273 | 456.32 | 58.696 | 434.89 |
| 57.258 | 456.5  | 58.681 | 435.06 |
| 57.242 | 456.67 | 58.667 | 435.23 |
| 57.23  | 456.84 | 58.654 | 435.4  |
| 57.211 | 457.01 | 58.639 | 435.57 |
| 57.205 | 457.18 | 58.622 | 435.74 |
| 57.191 | 457.35 | 58.61  | 435.91 |
| 57.171 | 457.52 | 58.595 | 436.08 |
| 57.151 | 457.69 | 58.578 | 436.25 |

|        |        |        |        |
|--------|--------|--------|--------|
| 57.137 | 457.86 | 58.568 | 436.42 |
| 57.12  | 458.03 | 58.558 | 436.59 |
| 57.103 | 458.2  | 58.546 | 436.76 |
| 57.089 | 458.37 | 58.531 | 436.93 |
| 57.081 | 458.55 | 58.516 | 437.1  |
| 57.067 | 458.72 | 58.504 | 437.27 |
| 57.053 | 458.89 | 58.489 | 437.44 |
| 57.044 | 459.06 | 58.481 | 437.61 |
| 57.03  | 459.23 | 58.471 | 437.78 |
| 57.016 | 459.4  | 58.457 | 437.96 |
| 57.002 | 459.57 | 58.437 | 438.13 |
| 56.993 | 459.74 | 58.427 | 438.3  |
| 56.979 | 459.91 | 58.412 | 438.47 |
| 56.971 | 460.08 | 58.405 | 438.64 |
| 56.962 | 460.26 | 58.39  | 438.81 |
| 56.951 | 460.43 | 58.375 | 438.98 |
| 56.937 | 460.6  | 58.358 | 439.15 |
| 56.915 | 460.77 | 58.348 | 439.32 |
| 56.898 | 460.94 | 58.336 | 439.49 |
| 56.889 | 461.11 | 58.316 | 439.66 |
| 56.878 | 461.28 | 58.301 | 439.83 |
| 56.872 | 461.45 | 58.294 | 440    |
| 56.858 | 461.62 | 58.284 | 440.17 |
| 56.844 | 461.79 | 58.276 | 440.34 |
| 56.833 | 461.97 | 58.259 | 440.51 |
| 56.824 | 462.14 | 58.242 | 440.68 |
| 56.813 | 462.31 | 58.232 | 440.85 |
| 56.805 | 462.48 | 58.222 | 441.02 |
| 56.793 | 462.65 | 58.212 | 441.19 |
| 56.779 | 462.82 | 58.202 | 441.36 |
| 56.768 | 462.99 | 58.185 | 441.53 |
| 56.757 | 463.16 | 58.17  | 441.7  |
| 56.745 | 463.33 | 58.158 | 441.87 |
| 56.737 | 463.5  | 58.153 | 442.04 |
| 56.728 | 463.67 | 58.136 | 442.21 |
| 56.714 | 463.84 | 58.123 | 442.38 |
| 56.706 | 464.01 | 58.106 | 442.56 |
| 56.695 | 464.18 | 58.101 | 442.73 |
| 56.689 | 464.36 | 58.089 | 442.9  |
| 56.681 | 464.53 | 58.084 | 443.07 |
| 56.666 | 464.7  | 58.071 | 443.24 |
| 56.658 | 464.87 | 58.052 | 443.41 |
| 56.647 | 465.04 | 58.039 | 443.58 |
| 56.633 | 465.21 | 58.024 | 443.75 |
| 56.624 | 465.38 | 58.017 | 443.92 |
| 56.613 | 465.55 | 58.002 | 444.09 |
| 56.602 | 465.72 | 57.992 | 444.26 |
| 56.593 | 465.89 | 57.977 | 444.43 |
| 56.585 | 466.06 | 57.963 | 444.6  |
| 56.582 | 466.23 | 57.958 | 444.77 |
| 56.571 | 466.4  | 57.948 | 444.94 |
| 56.557 | 466.58 | 57.935 | 445.11 |
| 56.548 | 466.75 | 57.921 | 445.28 |
| 56.542 | 466.92 | 57.906 | 445.45 |

|        |        |        |        |
|--------|--------|--------|--------|
| 56.534 | 467.09 | 57.893 | 445.62 |
| 56.526 | 467.26 | 57.879 | 445.79 |
| 56.511 | 467.43 | 57.861 | 445.96 |
| 56.5   | 467.6  | 57.851 | 446.13 |
| 56.492 | 467.77 | 57.842 | 446.3  |
| 56.486 | 467.94 | 57.832 | 446.47 |
| 56.478 | 468.11 | 57.822 | 446.64 |
| 56.472 | 468.28 | 57.812 | 446.81 |
| 56.461 | 468.45 | 57.8   | 446.98 |
| 56.449 | 468.62 | 57.785 | 447.15 |
| 56.438 | 468.8  | 57.772 | 447.32 |
| 56.427 | 468.97 | 57.765 | 447.49 |
| 56.418 | 469.14 | 57.75  | 447.66 |
| 56.41  | 469.31 | 57.74  | 447.83 |
| 56.407 | 469.48 | 57.728 | 448    |
| 56.399 | 469.65 | 57.716 | 448.17 |
| 56.39  | 469.82 | 57.703 | 448.34 |
| 56.382 | 469.99 | 57.693 | 448.51 |
| 56.379 | 470.16 | 57.686 | 448.68 |
| 56.371 | 470.33 | 57.674 | 448.85 |
| 56.362 | 470.5  | 57.656 | 449.02 |
| 56.356 | 470.67 | 57.646 | 449.19 |
| 56.351 | 470.84 | 57.641 | 449.36 |
| 56.339 | 471.01 | 57.632 | 449.53 |
| 56.334 | 471.19 | 57.619 | 449.7  |
| 56.325 | 471.36 | 57.604 | 449.87 |
| 56.317 | 471.53 | 57.595 | 450.04 |
| 56.308 | 471.7  | 57.585 | 450.21 |
| 56.297 | 471.87 | 57.58  | 450.38 |
| 56.289 | 472.04 | 57.567 | 450.55 |
| 56.283 | 472.21 | 57.555 | 450.72 |
| 56.272 | 472.38 | 57.545 | 450.89 |
| 56.266 | 472.55 | 57.535 | 451.06 |
| 56.263 | 472.72 | 57.523 | 451.23 |
| 56.255 | 472.89 | 57.516 | 451.4  |
| 56.249 | 473.06 | 57.503 | 451.57 |
| 56.244 | 473.23 | 57.493 | 451.74 |
| 56.232 | 473.4  | 57.481 | 451.91 |
| 56.23  | 473.58 | 57.474 | 452.08 |
| 56.218 | 473.75 | 57.461 | 452.25 |
| 56.207 | 473.92 | 57.449 | 452.42 |
| 56.201 | 474.09 | 57.441 | 452.59 |
| 56.193 | 474.26 | 57.427 | 452.76 |
| 56.187 | 474.43 | 57.417 | 452.93 |
| 56.182 | 474.6  | 57.404 | 453.1  |
| 56.176 | 474.77 | 57.397 | 453.27 |
| 56.168 | 474.94 | 57.382 | 453.44 |
| 56.159 | 475.11 | 57.372 | 453.61 |
| 56.151 | 475.28 | 57.36  | 453.78 |
| 56.142 | 475.45 | 57.35  | 453.96 |
| 56.137 | 475.62 | 57.335 | 454.13 |
| 56.131 | 475.79 | 57.325 | 454.3  |
| 56.12  | 475.96 | 57.315 | 454.47 |
| 56.114 | 476.13 | 57.308 | 454.64 |

|        |        |        |        |
|--------|--------|--------|--------|
| 56.103 | 476.31 | 57.301 | 454.81 |
| 56.094 | 476.48 | 57.291 | 454.98 |
| 56.091 | 476.65 | 57.273 | 455.15 |
| 56.086 | 476.82 | 57.264 | 455.32 |
| 56.072 | 476.99 | 57.254 | 455.49 |
| 56.063 | 477.16 | 57.246 | 455.66 |
| 56.055 | 477.33 | 57.234 | 455.83 |
| 56.049 | 477.5  | 57.226 | 456    |
| 56.044 | 477.67 | 57.214 | 456.17 |
| 56.038 | 477.84 | 57.204 | 456.34 |
| 56.032 | 478.01 | 57.197 | 456.51 |
| 56.027 | 478.18 | 57.187 | 456.68 |
| 56.024 | 478.35 | 57.172 | 456.85 |
| 56.018 | 478.52 | 57.155 | 457.02 |
| 56.013 | 478.69 | 57.152 | 457.19 |
| 56.001 | 478.86 | 57.14  | 457.37 |
| 55.998 | 479.03 | 57.135 | 457.54 |
| 55.993 | 479.2  | 57.123 | 457.71 |
| 55.987 | 479.38 | 57.113 | 457.88 |
| 55.982 | 479.55 | 57.105 | 458.05 |
| 55.976 | 479.72 | 57.093 | 458.22 |
| 55.97  | 479.89 | 57.086 | 458.39 |
| 55.962 | 480.06 | 57.076 | 458.56 |
| 55.959 | 480.23 | 57.063 | 458.73 |
| 55.948 | 480.4  | 57.056 | 458.9  |
| 55.942 | 480.57 | 57.044 | 459.07 |
| 55.934 | 480.74 | 57.036 | 459.24 |
| 55.928 | 480.91 | 57.026 | 459.41 |
| 55.925 | 481.08 | 57.012 | 459.58 |
| 55.919 | 481.25 | 57.004 | 459.75 |
| 55.911 | 481.42 | 56.997 | 459.92 |
| 55.908 | 481.59 | 56.984 | 460.09 |
| 55.903 | 481.76 | 56.97  | 460.26 |
| 55.897 | 481.93 | 56.96  | 460.43 |
| 55.888 | 482.1  | 56.947 | 460.6  |
| 55.883 | 482.27 | 56.942 | 460.77 |
| 55.877 | 482.45 | 56.933 | 460.95 |
| 55.872 | 482.62 | 56.925 | 461.12 |
| 55.863 | 482.79 | 56.913 | 461.29 |
| 55.855 | 482.96 | 56.908 | 461.46 |
| 55.849 | 483.13 | 56.898 | 461.63 |
| 55.841 | 483.3  | 56.886 | 461.8  |
| 55.838 | 483.47 | 56.876 | 461.97 |
| 55.832 | 483.64 | 56.863 | 462.14 |
| 55.829 | 483.81 | 56.849 | 462.31 |
| 55.824 | 483.98 | 56.839 | 462.48 |
| 55.821 | 484.15 | 56.831 | 462.65 |
| 55.818 | 484.32 | 56.821 | 462.82 |
| 55.812 | 484.49 | 56.816 | 462.99 |
| 55.807 | 484.66 | 56.812 | 463.16 |
| 55.795 | 484.83 | 56.804 | 463.33 |
| 55.79  | 485    | 56.792 | 463.5  |
| 55.784 | 485.17 | 56.782 | 463.67 |
| 55.779 | 485.34 | 56.767 | 463.84 |

|        |        |        |        |
|--------|--------|--------|--------|
| 55.776 | 485.51 | 56.757 | 464.01 |
| 55.767 | 485.68 | 56.747 | 464.18 |
| 55.762 | 485.85 | 56.745 | 464.35 |
| 55.756 | 486.02 | 56.737 | 464.52 |
| 55.75  | 486.19 | 56.728 | 464.69 |
| 55.745 | 486.36 | 56.718 | 464.87 |
| 55.736 | 486.54 | 56.708 | 465.04 |
| 55.728 | 486.71 | 56.703 | 465.21 |
| 55.722 | 486.88 | 56.693 | 465.38 |
| 55.719 | 487.05 | 56.686 | 465.55 |
| 55.711 | 487.22 | 56.673 | 465.72 |
| 55.705 | 487.39 | 56.658 | 465.89 |
| 55.705 | 487.56 | 56.648 | 466.06 |
| 55.697 | 487.73 | 56.636 | 466.23 |
| 55.691 | 487.9  | 56.631 | 466.4  |
| 55.686 | 488.07 | 56.619 | 466.57 |
| 55.68  | 488.24 | 56.614 | 466.74 |
| 55.674 | 488.41 | 56.602 | 466.91 |
| 55.666 | 488.58 | 56.592 | 467.08 |
| 55.66  | 488.75 | 56.584 | 467.26 |
| 55.657 | 488.92 | 56.577 | 467.43 |
| 55.652 | 489.09 | 56.569 | 467.6  |
| 55.643 | 489.26 | 56.56  | 467.77 |
| 55.638 | 489.43 | 56.547 | 467.94 |
| 55.632 | 489.6  | 56.535 | 468.11 |
| 55.626 | 489.77 | 56.53  | 468.28 |
| 55.621 | 489.94 | 56.522 | 468.45 |
| 55.618 | 490.11 | 56.518 | 468.62 |
| 55.612 | 490.28 | 56.505 | 468.79 |
| 55.609 | 490.45 | 56.493 | 468.96 |
| 55.601 | 490.62 | 56.48  | 469.13 |
| 55.595 | 490.79 | 56.473 | 469.3  |
| 55.593 | 490.96 | 56.468 | 469.47 |
| 55.584 | 491.13 | 56.458 | 469.64 |
| 55.581 | 491.3  | 56.446 | 469.82 |
| 55.576 | 491.47 | 56.436 | 469.99 |
| 55.573 | 491.64 | 56.429 | 470.16 |
| 55.57  | 491.81 | 56.421 | 470.33 |
| 55.562 | 491.99 | 56.411 | 470.5  |
| 55.556 | 492.16 | 56.399 | 470.67 |
| 55.55  | 492.33 | 56.394 | 470.84 |
| 55.547 | 492.5  | 56.384 | 471.01 |
| 55.545 | 492.67 | 56.379 | 471.18 |
| 55.536 | 492.84 | 56.369 | 471.35 |
| 55.53  | 493.01 | 56.359 | 471.52 |
| 55.522 | 493.18 | 56.355 | 471.69 |
| 55.516 | 493.35 | 56.347 | 471.86 |
| 55.511 | 493.52 | 56.34  | 472.03 |
| 55.508 | 493.69 | 56.33  | 472.2  |
| 55.502 | 493.86 | 56.32  | 472.38 |
| 55.499 | 494.03 | 56.313 | 472.55 |
| 55.494 | 494.2  | 56.303 | 472.72 |
| 55.491 | 494.37 | 56.293 | 472.89 |
| 55.485 | 494.54 | 56.285 | 473.06 |

|        |        |        |        |
|--------|--------|--------|--------|
| 55.48  | 494.71 | 56.278 | 473.23 |
| 55.474 | 494.88 | 56.271 | 473.4  |
| 55.468 | 495.05 | 56.261 | 473.57 |
| 55.463 | 495.22 | 56.256 | 473.74 |
| 55.46  | 495.39 | 56.243 | 473.91 |
| 55.454 | 495.56 | 56.233 | 474.08 |
| 55.449 | 495.73 | 56.224 | 474.25 |
| 55.446 | 495.9  | 56.211 | 474.43 |
| 55.443 | 496.07 | 56.204 | 474.6  |
| 55.437 | 496.24 | 56.196 | 474.77 |
| 55.432 | 496.41 | 56.187 | 474.94 |
| 55.426 | 496.58 | 56.182 | 475.11 |
| 55.421 | 496.75 | 56.174 | 475.28 |
| 55.418 | 496.92 | 56.167 | 475.45 |
| 55.415 | 497.09 | 56.159 | 475.62 |
| 55.412 | 497.26 | 56.149 | 475.79 |
| 55.406 | 497.43 | 56.142 | 475.96 |
| 55.404 | 497.6  | 56.13  | 476.13 |
| 55.398 | 497.77 | 56.125 | 476.3  |
| 55.398 | 497.94 | 56.117 | 476.48 |
| 55.39  | 498.11 | 56.108 | 476.65 |
| 55.387 | 498.28 | 56.098 | 476.82 |
| 55.381 | 498.45 | 56.088 | 476.99 |
| 55.375 | 498.62 | 56.075 | 477.16 |
| 55.37  | 498.79 | 56.066 | 477.33 |
| 55.367 | 498.96 | 56.058 | 477.5  |
| 55.359 | 499.13 | 56.053 | 477.67 |
| 55.356 | 499.3  | 56.046 | 477.84 |
| 55.35  | 499.47 | 56.041 | 478.01 |
| 55.342 | 499.64 | 56.028 | 478.18 |
| 55.336 | 499.81 | 56.024 | 478.36 |
| 55.33  | 499.98 | 56.016 | 478.53 |
| 55.322 | 500.15 | 56.009 | 478.7  |
| 55.316 | 500.32 | 55.999 | 478.87 |
| 55.311 | 500.49 | 55.986 | 479.04 |
| 55.305 | 500.66 | 55.977 | 479.21 |
| 55.302 | 500.83 | 55.967 | 479.38 |
| 55.299 | 501    | 55.967 | 479.55 |
| 55.297 | 501.17 | 55.947 | 479.72 |
| 55.291 | 501.34 | 55.935 | 479.89 |
| 55.291 | 501.51 | 55.927 | 480.06 |
| 55.285 | 501.68 | 55.92  | 480.23 |
| 55.282 | 501.85 | 55.917 | 480.41 |
| 55.28  | 502.02 | 55.907 | 480.58 |
| 55.277 | 502.19 | 55.9   | 480.75 |
| 55.271 | 502.36 | 55.893 | 480.92 |
| 55.266 | 502.53 | 55.885 | 481.09 |
| 55.26  | 502.7  | 55.88  | 481.26 |
| 55.254 | 502.87 | 55.868 | 481.43 |
| 55.246 | 503.04 | 55.86  | 481.6  |
| 55.235 | 503.21 | 55.851 | 481.77 |
| 55.235 | 503.38 | 55.846 | 481.94 |
| 55.229 | 503.55 | 55.836 | 482.11 |
| 55.226 | 503.72 | 55.828 | 482.28 |

|        |        |        |        |
|--------|--------|--------|--------|
| 55.22  | 503.89 | 55.818 | 482.45 |
| 55.218 | 504.06 | 55.809 | 482.63 |
| 55.215 | 504.23 | 55.806 | 482.8  |
| 55.212 | 504.4  | 55.796 | 482.97 |
| 55.206 | 504.57 | 55.794 | 483.14 |
| 55.204 | 504.74 | 55.781 | 483.31 |
| 55.198 | 504.91 | 55.776 | 483.48 |
| 55.192 | 505.08 | 55.764 | 483.65 |
| 55.189 | 505.25 | 55.754 | 483.82 |
| 55.184 | 505.42 | 55.747 | 483.99 |
| 55.181 | 505.59 | 55.737 | 484.16 |
| 55.178 | 505.76 | 55.732 | 484.33 |
| 55.175 | 505.93 | 55.725 | 484.5  |
| 55.17  | 506.1  | 55.717 | 484.67 |
| 55.167 | 506.27 | 55.71  | 484.84 |
| 55.161 | 506.44 | 55.702 | 485.02 |
| 55.158 | 506.61 | 55.695 | 485.19 |
| 55.153 | 506.78 | 55.688 | 485.36 |
| 55.15  | 506.95 | 55.678 | 485.53 |
| 55.144 | 507.12 | 55.673 | 485.7  |
| 55.142 | 507.29 | 55.663 | 485.87 |
| 55.136 | 507.46 | 55.653 | 486.04 |
| 55.133 | 507.63 | 55.641 | 486.21 |
| 55.13  | 507.8  | 55.638 | 486.38 |
| 55.125 | 507.97 | 55.631 | 486.55 |
| 55.122 | 508.14 | 55.621 | 486.72 |
| 55.116 | 508.31 | 55.616 | 486.89 |
| 55.11  | 508.48 | 55.609 | 487.06 |
| 55.108 | 508.65 | 55.604 | 487.23 |
| 55.102 | 508.82 | 55.596 | 487.4  |
| 55.099 | 508.99 | 55.586 | 487.57 |
| 55.096 | 509.16 | 55.576 | 487.74 |
| 55.088 | 509.33 | 55.567 | 487.91 |
| 55.085 | 509.5  | 55.557 | 488.09 |
| 55.079 | 509.67 | 55.552 | 488.26 |
| 55.074 | 509.84 | 55.547 | 488.43 |
| 55.068 | 510.01 | 55.537 | 488.6  |
| 55.063 | 510.18 | 55.525 | 488.77 |
| 55.057 | 510.35 | 55.525 | 488.94 |
| 55.054 | 510.52 | 55.515 | 489.11 |
| 55.048 | 510.69 | 55.507 | 489.28 |
| 55.046 | 510.86 | 55.497 | 489.45 |
| 55.043 | 511.03 | 55.49  | 489.62 |
| 55.04  | 511.2  | 55.483 | 489.79 |
| 55.037 | 511.37 | 55.475 | 489.96 |
| 55.034 | 511.54 | 55.465 | 490.13 |
| 55.029 | 511.71 | 55.455 | 490.3  |
| 55.026 | 511.87 | 55.448 | 490.47 |
| 55.023 | 512.04 | 55.441 | 490.64 |
| 55.017 | 512.21 | 55.433 | 490.81 |
| 55.012 | 512.38 | 55.426 | 490.98 |
| 55.006 | 512.55 | 55.421 | 491.15 |
| 55.003 | 512.72 | 55.408 | 491.32 |
| 54.995 | 512.89 | 55.401 | 491.49 |

|        |        |        |        |
|--------|--------|--------|--------|
| 54.992 | 513.06 | 55.394 | 491.66 |
| 54.989 | 513.23 | 55.386 | 491.83 |
| 54.984 | 513.4  | 55.376 | 492.01 |
| 54.981 | 513.57 | 55.366 | 492.18 |
| 54.975 | 513.74 | 55.359 | 492.35 |
| 54.97  | 513.91 | 55.349 | 492.52 |
| 54.967 | 514.08 | 55.339 | 492.69 |
| 54.958 | 514.25 | 55.332 | 492.86 |
| 54.955 | 514.42 | 55.324 | 493.03 |
| 54.95  | 514.59 | 55.315 | 493.2  |
| 54.944 | 514.76 | 55.307 | 493.37 |
| 54.941 | 514.93 | 55.295 | 493.54 |
| 54.939 | 515.1  | 55.287 | 493.71 |
| 54.936 | 515.27 | 55.282 | 493.88 |
| 54.93  | 515.44 | 55.278 | 494.05 |
| 54.922 | 515.61 | 55.275 | 494.22 |
| 54.919 | 515.78 | 55.268 | 494.39 |
| 54.916 | 515.95 | 55.26  | 494.56 |
| 54.91  | 516.12 | 55.253 | 494.73 |
| 54.905 | 516.29 | 55.243 | 494.9  |
| 54.902 | 516.46 | 55.236 | 495.07 |
| 54.896 | 516.63 | 55.228 | 495.24 |
| 54.893 | 516.8  | 55.223 | 495.41 |
| 54.888 | 516.97 | 55.213 | 495.58 |
| 54.885 | 517.14 | 55.203 | 495.75 |
| 54.879 | 517.31 | 55.196 | 495.92 |
| 54.879 | 517.48 | 55.191 | 496.09 |
| 54.871 | 517.65 | 55.181 | 496.26 |
| 54.868 | 517.82 | 55.171 | 496.43 |
| 54.862 | 517.99 | 55.164 | 496.6  |
| 54.86  | 518.16 | 55.152 | 496.77 |
| 54.851 | 518.33 | 55.147 | 496.94 |
| 54.848 | 518.5  | 55.139 | 497.11 |
| 54.846 | 518.67 | 55.129 | 497.28 |
| 54.84  | 518.84 | 55.124 | 497.45 |
| 54.837 | 519.01 | 55.119 | 497.62 |
| 54.831 | 519.18 | 55.112 | 497.79 |
| 54.829 | 519.35 | 55.11  | 497.96 |
| 54.826 | 519.52 | 55.097 | 498.13 |
| 54.82  | 519.69 | 55.085 | 498.3  |
| 54.817 | 519.86 | 55.077 | 498.48 |
| 54.809 | 520.03 | 55.065 | 498.65 |
| 54.803 | 520.2  | 55.058 | 498.82 |
| 54.8   | 520.37 | 55.05  | 498.99 |
| 54.798 | 520.53 | 55.043 | 499.16 |
| 54.795 | 520.7  | 55.035 | 499.33 |
| 54.789 | 520.87 | 55.028 | 499.5  |
| 54.786 | 521.04 | 55.018 | 499.67 |
| 54.784 | 521.21 | 55.013 | 499.84 |
| 54.781 | 521.38 | 55.008 | 500.01 |
| 54.778 | 521.55 | 55.001 | 500.18 |
| 54.775 | 521.72 | 54.993 | 500.35 |
| 54.772 | 521.89 | 54.981 | 500.52 |
| 54.769 | 522.06 | 54.976 | 500.69 |



|        |        |        |        |
|--------|--------|--------|--------|
| 54.764 | 522.23 | 54.969 | 500.86 |
| 54.761 | 522.4  | 54.959 | 501.03 |
| 54.755 | 522.57 | 54.954 | 501.2  |
| 54.747 | 522.74 | 54.947 | 501.37 |
| 54.744 | 522.91 | 54.939 | 501.54 |
| 54.738 | 523.08 | 54.927 | 501.71 |
| 54.738 | 523.25 | 54.914 | 501.88 |
| 54.736 | 523.42 | 54.909 | 502.05 |
| 54.733 | 523.59 | 54.905 | 502.22 |
| 54.73  | 523.76 | 54.897 | 502.39 |
| 54.727 | 523.93 | 54.895 | 502.56 |
| 54.722 | 524.1  | 54.885 | 502.73 |
| 54.722 | 524.27 | 54.877 | 502.9  |
| 54.719 | 524.44 | 54.87  | 503.07 |
| 54.713 | 524.61 | 54.865 | 503.24 |
| 54.707 | 524.78 | 54.855 | 503.41 |
| 54.702 | 524.95 | 54.848 | 503.58 |
| 54.696 | 525.12 | 54.835 | 503.75 |
| 54.69  | 525.29 | 54.828 | 503.92 |
| 54.685 | 525.46 | 54.821 | 504.09 |
| 54.676 | 525.63 | 54.813 | 504.26 |
| 54.674 | 525.8  | 54.806 | 504.43 |
| 54.668 | 525.96 | 54.796 | 504.6  |
| 54.665 | 526.13 | 54.783 | 504.77 |
| 54.662 | 526.3  | 54.774 | 504.94 |
| 54.659 | 526.47 | 54.764 | 505.11 |
| 54.654 | 526.64 | 54.756 | 505.28 |
| 54.651 | 526.81 | 54.746 | 505.45 |
| 54.648 | 526.98 | 54.739 | 505.62 |
| 54.645 | 527.15 | 54.729 | 505.79 |
| 54.64  | 527.32 | 54.724 | 505.96 |
| 54.634 | 527.49 | 54.717 | 506.13 |
| 54.631 | 527.66 | 54.712 | 506.3  |
| 54.628 | 527.83 | 54.704 | 506.47 |
| 54.626 | 528    | 54.697 | 506.64 |
| 54.62  | 528.17 | 54.69  | 506.82 |
| 54.617 | 528.34 | 54.682 | 506.99 |
| 54.612 | 528.51 | 54.677 | 507.16 |
| 54.609 | 528.68 | 54.672 | 507.33 |
| 54.606 | 528.85 | 54.662 | 507.5  |
| 54.603 | 529.02 | 54.653 | 507.67 |
| 54.597 | 529.18 | 54.643 | 507.84 |
| 54.595 | 529.35 | 54.635 | 508.01 |
| 54.592 | 529.52 | 54.63  | 508.18 |
| 54.586 | 529.69 | 54.62  | 508.35 |
| 54.583 | 529.86 | 54.616 | 508.52 |
| 54.581 | 530.03 | 54.606 | 508.69 |
| 54.575 | 530.2  | 54.596 | 508.86 |
| 54.566 | 530.37 | 54.586 | 509.03 |
| 54.564 | 530.54 | 54.578 | 509.2  |
| 54.558 | 530.71 | 54.574 | 509.37 |
| 54.552 | 530.88 | 54.566 | 509.54 |
| 54.55  | 531.05 | 54.561 | 509.71 |
| 54.544 | 531.22 | 54.554 | 509.88 |

|         |         |         |         |
|---------|---------|---------|---------|
| 54. 541 | 531. 39 | 54. 546 | 510. 05 |
| 54. 538 | 531. 56 | 54. 541 | 510. 22 |
| 54. 535 | 531. 72 | 54. 529 | 510. 39 |
| 54. 53  | 531. 89 | 54. 522 | 510. 56 |
| 54. 524 | 532. 06 | 54. 509 | 510. 73 |
| 54. 521 | 532. 23 | 54. 502 | 510. 9  |
| 54. 519 | 532. 4  | 54. 49  | 511. 07 |
| 54. 513 | 532. 57 | 54. 485 | 511. 24 |
| 54. 507 | 532. 74 | 54. 477 | 511. 42 |
| 54. 502 | 532. 91 | 54. 467 | 511. 59 |
| 54. 499 | 533. 08 | 54. 457 | 511. 76 |
| 54. 496 | 533. 25 | 54. 455 | 511. 93 |
| 54. 49  | 533. 42 | 54. 448 | 512. 1  |
| 54. 485 | 533. 59 | 54. 443 | 512. 27 |
| 54. 479 | 533. 76 | 54. 435 | 512. 44 |
| 54. 476 | 533. 93 | 54. 423 | 512. 61 |
| 54. 473 | 534. 1  | 54. 415 | 512. 78 |
| 54. 471 | 534. 27 | 54. 413 | 512. 95 |
| 54. 465 | 534. 44 | 54. 403 | 513. 12 |
| 54. 462 | 534. 6  | 54. 393 | 513. 29 |
| 54. 459 | 534. 77 | 54. 386 | 513. 46 |
| 54. 457 | 534. 94 | 54. 378 | 513. 63 |
| 54. 454 | 535. 11 | 54. 371 | 513. 8  |
| 54. 451 | 535. 28 | 54. 364 | 513. 97 |
| 54. 445 | 535. 45 | 54. 351 | 514. 14 |
| 54. 442 | 535. 62 | 54. 344 | 514. 31 |
| 54. 437 | 535. 79 | 54. 336 | 514. 48 |
| 54. 434 | 535. 96 | 54. 331 | 514. 65 |
| 54. 426 | 536. 13 | 54. 322 | 514. 82 |
| 54. 417 | 536. 3  | 54. 314 | 514. 99 |
| 54. 411 | 536. 47 | 54. 307 | 515. 16 |
| 54. 409 | 536. 64 | 54. 299 | 515. 33 |
| 54. 403 | 536. 81 | 54. 289 | 515. 5  |
| 54. 397 | 536. 98 | 54. 285 | 515. 68 |
| 54. 395 | 537. 15 | 54. 275 | 515. 85 |
| 54. 392 | 537. 31 | 54. 262 | 516. 02 |
| 54. 386 | 537. 48 | 54. 257 | 516. 19 |
| 54. 383 | 537. 65 | 54. 25  | 516. 36 |
| 54. 378 | 537. 82 | 54. 24  | 516. 53 |
| 54. 375 | 537. 99 | 54. 235 | 516. 7  |
| 54. 372 | 538. 16 | 54. 228 | 516. 87 |
| 54. 369 | 538. 33 | 54. 218 | 517. 04 |
| 54. 364 | 538. 5  | 54. 213 | 517. 21 |
| 54. 358 | 538. 67 | 54. 21  | 517. 38 |
| 54. 355 | 538. 84 | 54. 201 | 517. 55 |
| 54. 352 | 539. 01 | 54. 193 | 517. 72 |
| 54. 349 | 539. 18 | 54. 181 | 517. 89 |
| 54. 344 | 539. 35 | 54. 166 | 518. 06 |
| 54. 341 | 539. 52 | 54. 161 | 518. 23 |
| 54. 338 | 539. 68 | 54. 156 | 518. 4  |
| 54. 335 | 539. 85 | 54. 146 | 518. 57 |
| 54. 33  | 540. 02 | 54. 141 | 518. 74 |
| 54. 327 | 540. 19 | 54. 134 | 518. 91 |
| 54. 324 | 540. 36 | 54. 126 | 519. 08 |

|        |        |        |        |
|--------|--------|--------|--------|
| 54.321 | 540.53 | 54.117 | 519.25 |
| 54.316 | 540.7  | 54.109 | 519.42 |
| 54.313 | 540.87 | 54.099 | 519.59 |
| 54.31  | 541.04 | 54.097 | 519.77 |
| 54.307 | 541.21 | 54.089 | 519.94 |
| 54.301 | 541.38 | 54.079 | 520.11 |
| 54.296 | 541.55 | 54.07  | 520.28 |
| 54.29  | 541.72 | 54.06  | 520.45 |
| 54.287 | 541.89 | 54.055 | 520.62 |
| 54.282 | 542.05 | 54.052 | 520.79 |
| 54.279 | 542.22 | 54.047 | 520.96 |
| 54.276 | 542.39 | 54.035 | 521.13 |
| 54.273 | 542.56 | 54.028 | 521.3  |
| 54.27  | 542.73 | 54.018 | 521.47 |
| 54.268 | 542.9  | 54.01  | 521.64 |
| 54.262 | 543.07 | 54.005 | 521.81 |
| 54.256 | 543.24 | 53.998 | 521.98 |
| 54.254 | 543.41 | 53.986 | 522.15 |
| 54.251 | 543.58 | 53.976 | 522.32 |
| 54.245 | 543.75 | 53.966 | 522.49 |
| 54.239 | 543.92 | 53.961 | 522.66 |
| 54.234 | 544.09 | 53.951 | 522.83 |
| 54.231 | 544.26 | 53.944 | 523    |
| 54.225 | 544.42 | 53.936 | 523.17 |
| 54.22  | 544.59 | 53.931 | 523.34 |
| 54.214 | 544.76 | 53.924 | 523.51 |
| 54.211 | 544.93 | 53.914 | 523.68 |
| 54.203 | 545.1  | 53.907 | 523.85 |
| 54.203 | 545.27 | 53.899 | 524.02 |
| 54.197 | 545.44 | 53.894 | 524.19 |
| 54.197 | 545.61 | 53.884 | 524.36 |
| 54.192 | 545.78 | 53.877 | 524.54 |
| 54.186 | 545.95 | 53.867 | 524.71 |
| 54.183 | 546.12 | 53.86  | 524.88 |
| 54.18  | 546.29 | 53.85  | 525.05 |
| 54.177 | 546.46 | 53.842 | 525.22 |
| 54.172 | 546.63 | 53.837 | 525.39 |
| 54.166 | 546.8  | 53.825 | 525.56 |
| 54.163 | 546.96 | 53.82  | 525.73 |
| 54.158 | 547.13 | 53.808 | 525.9  |
| 54.149 | 547.3  | 53.8   | 526.07 |
| 54.144 | 547.47 | 53.788 | 526.24 |
| 54.141 | 547.64 | 53.781 | 526.41 |
| 54.135 | 547.81 | 53.778 | 526.58 |
| 54.13  | 547.98 | 53.768 | 526.75 |
| 54.127 | 548.15 | 53.761 | 526.92 |
| 54.124 | 548.32 | 53.751 | 527.09 |
| 54.121 | 548.49 | 53.741 | 527.26 |
| 54.115 | 548.66 | 53.729 | 527.43 |
| 54.11  | 548.83 | 53.721 | 527.6  |
| 54.107 | 549    | 53.714 | 527.77 |
| 54.104 | 549.16 | 53.709 | 527.94 |
| 54.101 | 549.33 | 53.702 | 528.11 |
| 54.096 | 549.5  | 53.692 | 528.28 |

|        |        |        |        |
|--------|--------|--------|--------|
| 54.09  | 549.67 | 53.682 | 528.45 |
| 54.087 | 549.84 | 53.677 | 528.62 |
| 54.082 | 550.01 | 53.669 | 528.79 |
| 54.079 | 550.18 | 53.665 | 528.96 |
| 54.076 | 550.35 | 53.657 | 529.13 |
| 54.073 | 550.52 | 53.65  | 529.3  |
| 54.068 | 550.69 | 53.642 | 529.47 |
| 54.065 | 550.86 | 53.635 | 529.64 |
| 54.059 | 551.03 | 53.625 | 529.81 |
| 54.051 | 551.2  | 53.618 | 529.98 |
| 54.045 | 551.37 | 53.608 | 530.15 |
| 54.042 | 551.54 | 53.603 | 530.32 |
| 54.034 | 551.71 | 53.59  | 530.49 |
| 54.028 | 551.88 | 53.578 | 530.66 |
| 54.022 | 552.05 | 53.571 | 530.84 |
| 54.02  | 552.22 | 53.566 | 531.01 |
| 54.02  | 552.38 | 53.558 | 531.18 |
| 54.014 | 552.55 | 53.553 | 531.35 |
| 54.011 | 552.72 | 53.541 | 531.52 |
| 54.006 | 552.89 | 53.531 | 531.69 |
| 54.003 | 553.06 | 53.521 | 531.86 |
| 54     | 553.23 | 53.514 | 532.03 |
| 53.994 | 553.4  | 53.509 | 532.2  |
| 53.994 | 553.57 | 53.501 | 532.37 |
| 53.989 | 553.74 | 53.499 | 532.54 |
| 53.983 | 553.91 | 53.492 | 532.71 |
| 53.98  | 554.08 | 53.487 | 532.88 |
| 53.977 | 554.25 | 53.479 | 533.05 |
| 53.972 | 554.42 | 53.469 | 533.22 |
| 53.966 | 554.59 | 53.457 | 533.39 |
| 53.963 | 554.76 | 53.445 | 533.56 |
| 53.958 | 554.92 | 53.432 | 533.73 |
| 53.952 | 555.09 | 53.425 | 533.9  |
| 53.949 | 555.26 | 53.42  | 534.07 |
| 53.946 | 555.43 | 53.41  | 534.24 |
| 53.941 | 555.6  | 53.405 | 534.41 |
| 53.938 | 555.77 | 53.4   | 534.58 |
| 53.935 | 555.94 | 53.39  | 534.75 |
| 53.932 | 556.11 | 53.383 | 534.92 |
| 53.929 | 556.28 | 53.373 | 535.09 |
| 53.924 | 556.45 | 53.366 | 535.26 |
| 53.918 | 556.62 | 53.361 | 535.43 |
| 53.915 | 556.79 | 53.353 | 535.6  |
| 53.91  | 556.96 | 53.346 | 535.77 |
| 53.904 | 557.13 | 53.333 | 535.94 |
| 53.898 | 557.3  | 53.324 | 536.11 |
| 53.896 | 557.47 | 53.309 | 536.28 |
| 53.89  | 557.64 | 53.306 | 536.45 |
| 53.884 | 557.81 | 53.299 | 536.62 |
| 53.879 | 557.97 | 53.292 | 536.79 |
| 53.876 | 558.14 | 53.282 | 536.96 |
| 53.873 | 558.31 | 53.274 | 537.13 |
| 53.867 | 558.48 | 53.269 | 537.3  |
| 53.859 | 558.65 | 53.259 | 537.47 |

|        |        |        |        |
|--------|--------|--------|--------|
| 53.853 | 558.82 | 53.25  | 537.64 |
| 53.85  | 558.99 | 53.242 | 537.81 |
| 53.848 | 559.16 | 53.235 | 537.98 |
| 53.845 | 559.33 | 53.227 | 538.15 |
| 53.839 | 559.5  | 53.217 | 538.32 |
| 53.834 | 559.67 | 53.21  | 538.49 |
| 53.831 | 559.84 | 53.203 | 538.66 |
| 53.828 | 560.01 | 53.198 | 538.83 |
| 53.825 | 560.18 | 53.193 | 539    |
| 53.819 | 560.35 | 53.183 | 539.17 |
| 53.817 | 560.52 | 53.173 | 539.34 |
| 53.811 | 560.69 | 53.166 | 539.51 |
| 53.808 | 560.86 | 53.156 | 539.68 |
| 53.803 | 561.03 | 53.148 | 539.85 |
| 53.797 | 561.2  | 53.138 | 540.02 |
| 53.794 | 561.37 | 53.126 | 540.19 |
| 53.786 | 561.54 | 53.121 | 540.36 |
| 53.783 | 561.7  | 53.116 | 540.53 |
| 53.78  | 561.87 | 53.109 | 540.7  |
| 53.774 | 562.04 | 53.104 | 540.87 |
| 53.772 | 562.21 | 53.091 | 541.05 |
| 53.769 | 562.38 | 53.086 | 541.22 |
| 53.766 | 562.55 | 53.079 | 541.39 |
| 53.763 | 562.72 | 53.072 | 541.56 |
| 53.76  | 562.89 | 53.062 | 541.73 |
| 53.755 | 563.06 | 53.054 | 541.9  |
| 53.749 | 563.23 | 53.042 | 542.07 |
| 53.743 | 563.4  | 53.035 | 542.24 |
| 53.741 | 563.57 | 53.027 | 542.41 |
| 53.735 | 563.74 | 53.02  | 542.58 |
| 53.729 | 563.91 | 53.012 | 542.75 |
| 53.724 | 564.08 | 53.005 | 542.92 |
| 53.715 | 564.25 | 52.993 | 543.09 |
| 53.712 | 564.42 | 52.985 | 543.26 |
| 53.707 | 564.59 | 52.975 | 543.43 |
| 53.701 | 564.76 | 52.968 | 543.6  |
| 53.695 | 564.93 | 52.958 | 543.77 |
| 53.69  | 565.1  | 52.951 | 543.94 |
| 53.687 | 565.26 | 52.943 | 544.11 |
| 53.687 | 565.43 | 52.936 | 544.28 |
| 53.684 | 565.6  | 52.926 | 544.45 |
| 53.679 | 565.77 | 52.919 | 544.62 |
| 53.676 | 565.94 | 52.909 | 544.79 |
| 53.67  | 566.11 | 52.901 | 544.96 |
| 53.667 | 566.28 | 52.894 | 545.13 |
| 53.664 | 566.45 | 52.886 | 545.3  |
| 53.659 | 566.62 | 52.877 | 545.47 |
| 53.653 | 566.79 | 52.872 | 545.64 |
| 53.648 | 566.96 | 52.864 | 545.81 |
| 53.642 | 567.13 | 52.857 | 545.98 |
| 53.639 | 567.3  | 52.847 | 546.15 |
| 53.636 | 567.47 | 52.837 | 546.32 |
| 53.628 | 567.64 | 52.825 | 546.49 |
| 53.622 | 567.81 | 52.815 | 546.67 |

|        |        |        |        |
|--------|--------|--------|--------|
| 53.617 | 567.98 | 52.81  | 546.84 |
| 53.614 | 568.15 | 52.805 | 547.01 |
| 53.611 | 568.32 | 52.797 | 547.18 |
| 53.602 | 568.49 | 52.785 | 547.35 |
| 53.597 | 568.66 | 52.773 | 547.52 |
| 53.594 | 568.83 | 52.763 | 547.69 |
| 53.591 | 569    | 52.758 | 547.86 |
| 53.586 | 569.17 | 52.753 | 548.03 |
| 53.583 | 569.34 | 52.746 | 548.2  |
| 53.577 | 569.51 | 52.733 | 548.37 |
| 53.574 | 569.68 | 52.721 | 548.54 |
| 53.571 | 569.85 | 52.713 | 548.71 |
| 53.569 | 570.02 | 52.701 | 548.88 |
| 53.566 | 570.19 | 52.696 | 549.05 |
| 53.56  | 570.35 | 52.691 | 549.22 |
| 53.555 | 570.52 | 52.689 | 549.39 |
| 53.552 | 570.69 | 52.681 | 549.56 |
| 53.546 | 570.86 | 52.674 | 549.73 |
| 53.54  | 571.03 | 52.662 | 549.9  |
| 53.535 | 571.2  | 52.649 | 550.07 |
| 53.532 | 571.37 | 52.639 | 550.24 |
| 53.529 | 571.54 | 52.632 | 550.42 |
| 53.526 | 571.71 | 52.625 | 550.59 |
| 53.518 | 571.88 | 52.615 | 550.76 |
| 53.515 | 572.05 | 52.605 | 550.93 |
| 53.509 | 572.22 | 52.602 | 551.1  |
| 53.504 | 572.39 | 52.59  | 551.27 |
| 53.495 | 572.56 | 52.583 | 551.44 |
| 53.493 | 572.73 | 52.573 | 551.61 |
| 53.484 | 572.9  | 52.565 | 551.78 |
| 53.481 | 573.07 | 52.563 | 551.95 |
| 53.478 | 573.24 | 52.553 | 552.12 |
| 53.476 | 573.41 | 52.543 | 552.29 |
| 53.47  | 573.58 | 52.533 | 552.46 |
| 53.467 | 573.75 | 52.523 | 552.63 |
| 53.461 | 573.92 | 52.516 | 552.8  |
| 53.459 | 574.09 | 52.508 | 552.97 |
| 53.453 | 574.26 | 52.501 | 553.14 |
| 53.447 | 574.43 | 52.494 | 553.31 |
| 53.445 | 574.6  | 52.486 | 553.48 |
| 53.439 | 574.77 | 52.474 | 553.65 |
| 53.433 | 574.94 | 52.466 | 553.82 |
| 53.43  | 575.11 | 52.459 | 553.99 |
| 53.422 | 575.28 | 52.449 | 554.17 |
| 53.416 | 575.45 | 52.439 | 554.34 |
| 53.408 | 575.62 | 52.429 | 554.51 |
| 53.402 | 575.79 | 52.424 | 554.68 |
| 53.399 | 575.96 | 52.417 | 554.85 |
| 53.394 | 576.13 | 52.41  | 555.02 |
| 53.391 | 576.3  | 52.397 | 555.19 |
| 53.388 | 576.47 | 52.385 | 555.36 |
| 53.38  | 576.64 | 52.378 | 555.53 |
| 53.377 | 576.81 | 52.37  | 555.7  |
| 53.371 | 576.98 | 52.365 | 555.87 |

|        |        |        |        |
|--------|--------|--------|--------|
| 53.368 | 577.15 | 52.355 | 556.04 |
| 53.366 | 577.32 | 52.345 | 556.21 |
| 53.36  | 577.49 | 52.338 | 556.38 |
| 53.352 | 577.66 | 52.331 | 556.55 |
| 53.352 | 577.83 | 52.321 | 556.72 |
| 53.349 | 578    | 52.311 | 556.89 |
| 53.34  | 578.17 | 52.301 | 557.06 |
| 53.335 | 578.34 | 52.298 | 557.23 |
| 53.329 | 578.51 | 52.289 | 557.4  |
| 53.326 | 578.68 | 52.281 | 557.58 |
| 53.318 | 578.85 | 52.269 | 557.75 |
| 53.315 | 579.02 | 52.261 | 557.92 |
| 53.309 | 579.19 | 52.254 | 558.09 |
| 53.306 | 579.36 | 52.247 | 558.26 |
| 53.301 | 579.53 | 52.239 | 558.43 |
| 53.298 | 579.7  | 52.229 | 558.6  |
| 53.292 | 579.87 | 52.222 | 558.77 |
| 53.29  | 580.04 | 52.21  | 558.94 |
| 53.281 | 580.21 | 52.2   | 559.11 |
| 53.278 | 580.38 | 52.19  | 559.28 |
| 53.273 | 580.55 | 52.182 | 559.45 |
| 53.267 | 580.72 | 52.173 | 559.62 |
| 53.261 | 580.89 | 52.16  | 559.79 |
| 53.259 | 581.05 | 52.155 | 559.96 |
| 53.25  | 581.22 | 52.148 | 560.13 |
| 53.247 | 581.39 | 52.138 | 560.3  |
| 53.242 | 581.56 | 52.133 | 560.47 |
| 53.236 | 581.73 | 52.123 | 560.64 |
| 53.228 | 581.9  | 52.118 | 560.81 |
| 53.225 | 582.07 | 52.108 | 560.98 |
| 53.213 | 582.25 | 52.096 | 561.16 |
| 53.211 | 582.42 | 52.091 | 561.33 |
| 53.205 | 582.59 | 52.086 | 561.5  |
| 53.199 | 582.76 | 52.079 | 561.67 |
| 53.197 | 582.93 | 52.069 | 561.84 |
| 53.191 | 583.1  | 52.059 | 562.01 |
| 53.185 | 583.27 | 52.049 | 562.18 |
| 53.182 | 583.44 | 52.039 | 562.35 |
| 53.177 | 583.61 | 52.032 | 562.52 |
| 53.171 | 583.78 | 52.022 | 562.69 |
| 53.166 | 583.95 | 52.014 | 562.86 |
| 53.16  | 584.12 | 52.009 | 563.03 |
| 53.157 | 584.29 | 52.002 | 563.2  |
| 53.151 | 584.46 | 52     | 563.37 |
| 53.146 | 584.63 | 51.99  | 563.54 |
| 53.143 | 584.8  | 51.98  | 563.71 |
| 53.14  | 584.97 | 51.97  | 563.88 |
| 53.135 | 585.14 | 51.958 | 564.05 |
| 53.135 | 585.31 | 51.948 | 564.22 |
| 53.126 | 585.48 | 51.943 | 564.39 |
| 53.123 | 585.65 | 51.935 | 564.57 |
| 53.118 | 585.82 | 51.928 | 564.74 |
| 53.112 | 585.99 | 51.921 | 564.91 |
| 53.109 | 586.16 | 51.913 | 565.08 |

|        |        |        |        |
|--------|--------|--------|--------|
| 53.104 | 586.33 | 51.906 | 565.25 |
| 53.098 | 586.5  | 51.896 | 565.42 |
| 53.095 | 586.67 | 51.888 | 565.59 |
| 53.089 | 586.84 | 51.879 | 565.76 |
| 53.084 | 587.01 | 51.871 | 565.93 |
| 53.075 | 587.18 | 51.861 | 566.1  |
| 53.07  | 587.35 | 51.859 | 566.27 |
| 53.064 | 587.52 | 51.851 | 566.44 |
| 53.061 | 587.69 | 51.842 | 566.61 |
| 53.056 | 587.86 | 51.829 | 566.78 |
| 53.053 | 588.03 | 51.822 | 566.95 |
| 53.044 | 588.2  | 51.812 | 567.12 |
| 53.041 | 588.37 | 51.802 | 567.3  |
| 53.039 | 588.54 | 51.792 | 567.47 |
| 53.033 | 588.71 | 51.787 | 567.64 |
| 53.03  | 588.88 | 51.785 | 567.81 |
| 53.022 | 589.05 | 51.775 | 567.98 |
| 53.016 | 589.22 | 51.77  | 568.15 |
| 53.008 | 589.39 | 51.76  | 568.32 |
| 53.002 | 589.56 | 51.75  | 568.49 |
| 52.996 | 589.73 | 51.74  | 568.66 |
| 52.991 | 589.9  | 51.73  | 568.83 |
| 52.985 | 590.07 | 51.723 | 569    |
| 52.979 | 590.24 | 51.711 | 569.17 |
| 52.974 | 590.41 | 51.698 | 569.34 |
| 52.971 | 590.58 | 51.688 | 569.51 |
| 52.965 | 590.75 | 51.683 | 569.68 |
| 52.957 | 590.92 | 51.674 | 569.85 |
| 52.954 | 591.09 | 51.669 | 570.02 |
| 52.948 | 591.26 | 51.656 | 570.2  |
| 52.94  | 591.43 | 51.654 | 570.37 |
| 52.934 | 591.6  | 51.644 | 570.54 |
| 52.932 | 591.77 | 51.634 | 570.71 |
| 52.926 | 591.94 | 51.624 | 570.88 |
| 52.92  | 592.11 | 51.619 | 571.05 |
| 52.915 | 592.28 | 51.612 | 571.22 |
| 52.912 | 592.45 | 51.607 | 571.39 |
| 52.906 | 592.62 | 51.594 | 571.56 |
| 52.895 | 592.79 | 51.587 | 571.73 |
| 52.892 | 592.96 | 51.58  | 571.9  |
| 52.886 | 593.13 | 51.577 | 572.07 |
| 52.878 | 593.3  | 51.565 | 572.24 |
| 52.872 | 593.47 | 51.557 | 572.41 |
| 52.87  | 593.64 | 51.548 | 572.59 |
| 52.864 | 593.81 | 51.538 | 572.76 |
| 52.861 | 593.98 | 51.53  | 572.93 |
| 52.853 | 594.15 | 51.523 | 573.1  |
| 52.85  | 594.32 | 51.515 | 573.27 |
| 52.844 | 594.49 | 51.506 | 573.44 |
| 52.839 | 594.66 | 51.498 | 573.61 |
| 52.833 | 594.83 | 51.491 | 573.78 |
| 52.827 | 595    | 51.483 | 573.95 |
| 52.822 | 595.17 | 51.476 | 574.12 |
| 52.816 | 595.34 | 51.464 | 574.29 |



|        |        |        |        |
|--------|--------|--------|--------|
| 52.81  | 595.51 | 51.456 | 574.46 |
| 52.805 | 595.68 | 51.446 | 574.63 |
| 52.799 | 595.85 | 51.439 | 574.8  |
| 52.793 | 596.02 | 51.431 | 574.97 |
| 52.788 | 596.19 | 51.422 | 575.14 |
| 52.785 | 596.36 | 51.412 | 575.32 |
| 52.779 | 596.53 | 51.409 | 575.49 |
| 52.771 | 596.7  | 51.399 | 575.66 |
| 52.765 | 596.87 | 51.392 | 575.83 |
| 52.76  | 597.04 | 51.382 | 576    |
| 52.757 | 597.21 | 51.37  | 576.17 |
| 52.748 | 597.38 | 51.365 | 576.34 |
| 52.746 | 597.55 | 51.352 | 576.51 |
| 52.74  | 597.73 | 51.347 | 576.68 |
| 52.734 | 597.9  | 51.34  | 576.85 |
| 52.729 | 598.07 | 51.33  | 577.02 |
| 52.723 | 598.24 | 51.325 | 577.19 |
| 52.715 | 598.41 | 51.315 | 577.36 |
| 52.709 | 598.58 | 51.305 | 577.53 |
| 52.7   | 598.75 | 51.298 | 577.7  |
| 52.695 | 598.92 | 51.288 | 577.88 |
| 52.689 | 599.09 | 51.278 | 578.05 |
| 52.684 | 599.26 | 51.273 | 578.22 |
| 52.681 | 599.43 | 51.263 | 578.39 |
| 52.678 | 599.6  | 51.256 | 578.56 |
| 52.672 | 599.77 | 51.249 | 578.73 |
| 52.669 | 599.94 | 51.241 | 578.9  |
| 52.658 | 600.11 | 51.231 | 579.07 |
| 52.655 | 600.28 | 51.224 | 579.24 |
| 52.647 | 600.45 | 51.214 | 579.41 |
| 52.641 | 600.62 | 51.204 | 579.58 |
| 52.638 | 600.79 | 51.197 | 579.75 |
| 52.633 | 600.96 | 51.187 | 579.92 |
| 52.627 | 601.13 | 51.18  | 580.1  |
| 52.621 | 601.3  | 51.17  | 580.27 |
| 52.619 | 601.47 | 51.157 | 580.44 |
| 52.613 | 601.64 | 51.15  | 580.61 |
| 52.605 | 601.81 | 51.147 | 580.78 |
| 52.596 | 601.98 | 51.142 | 580.95 |
| 52.588 | 602.15 | 51.13  | 581.12 |
| 52.585 | 602.32 | 51.125 | 581.29 |
| 52.579 | 602.49 | 51.115 | 581.46 |
| 52.571 | 602.66 | 51.108 | 581.63 |
| 52.562 | 602.83 | 51.098 | 581.8  |
| 52.557 | 603    | 51.088 | 581.97 |
| 52.551 | 603.17 | 51.081 | 582.14 |
| 52.543 | 603.34 | 51.073 | 582.32 |
| 52.537 | 603.51 | 51.063 | 582.49 |
| 52.531 | 603.68 | 51.054 | 582.66 |
| 52.528 | 603.85 | 51.049 | 582.83 |
| 52.523 | 604.02 | 51.039 | 583    |
| 52.52  | 604.19 | 51.029 | 583.17 |
| 52.514 | 604.36 | 51.021 | 583.34 |
| 52.509 | 604.53 | 51.012 | 583.51 |

|        |        |        |        |
|--------|--------|--------|--------|
| 52.506 | 604.71 | 50.999 | 583.68 |
| 52.5   | 604.88 | 50.989 | 583.85 |
| 52.495 | 605.05 | 50.982 | 584.02 |
| 52.489 | 605.22 | 50.972 | 584.19 |
| 52.481 | 605.39 | 50.97  | 584.36 |
| 52.475 | 605.56 | 50.967 | 584.53 |
| 52.469 | 605.73 | 50.96  | 584.71 |
| 52.464 | 605.9  | 50.95  | 584.88 |
| 52.458 | 606.07 | 50.94  | 585.05 |
| 52.452 | 606.24 | 50.93  | 585.22 |
| 52.447 | 606.41 | 50.92  | 585.39 |
| 52.441 | 606.58 | 50.913 | 585.56 |
| 52.438 | 606.75 | 50.9   | 585.73 |
| 52.43  | 606.92 | 50.895 | 585.9  |
| 52.424 | 607.09 | 50.888 | 586.07 |
| 52.419 | 607.26 | 50.878 | 586.24 |
| 52.41  | 607.43 | 50.871 | 586.41 |
| 52.407 | 607.6  | 50.866 | 586.58 |
| 52.399 | 607.77 | 50.858 | 586.76 |
| 52.39  | 607.94 | 50.851 | 586.93 |
| 52.382 | 608.11 | 50.834 | 587.1  |
| 52.376 | 608.28 | 50.829 | 587.27 |
| 52.371 | 608.45 | 50.816 | 587.44 |
| 52.362 | 608.62 | 50.811 | 587.61 |
| 52.357 | 608.79 | 50.802 | 587.78 |
| 52.351 | 608.96 | 50.792 | 587.95 |
| 52.345 | 609.13 | 50.784 | 588.12 |
| 52.337 | 609.3  | 50.779 | 588.29 |
| 52.331 | 609.47 | 50.774 | 588.47 |
| 52.323 | 609.64 | 50.767 | 588.64 |
| 52.314 | 609.81 | 50.757 | 588.81 |
| 52.309 | 609.99 | 50.747 | 588.98 |
| 52.303 | 610.16 | 50.737 | 589.15 |
| 52.295 | 610.33 | 50.73  | 589.32 |
| 52.292 | 610.5  | 50.725 | 589.49 |
| 52.286 | 610.67 | 50.715 | 589.66 |
| 52.28  | 610.84 | 50.708 | 589.83 |
| 52.272 | 611.01 | 50.698 | 590    |
| 52.266 | 611.18 | 50.688 | 590.17 |
| 52.261 | 611.35 | 50.683 | 590.35 |
| 52.255 | 611.52 | 50.673 | 590.52 |
| 52.252 | 611.69 | 50.663 | 590.69 |
| 52.247 | 611.86 | 50.656 | 590.86 |
| 52.241 | 612.03 | 50.651 | 591.03 |
| 52.235 | 612.2  | 50.643 | 591.2  |
| 52.227 | 612.37 | 50.639 | 591.37 |
| 52.218 | 612.54 | 50.626 | 591.54 |
| 52.207 | 612.71 | 50.616 | 591.71 |
| 52.201 | 612.88 | 50.606 | 591.88 |
| 52.193 | 613.05 | 50.597 | 592.06 |
| 52.185 | 613.22 | 50.592 | 592.23 |
| 52.182 | 613.39 | 50.587 | 592.4  |
| 52.179 | 613.56 | 50.579 | 592.57 |
| 52.17  | 613.73 | 50.572 | 592.74 |

|        |        |        |        |
|--------|--------|--------|--------|
| 52.162 | 613.9  | 50.569 | 592.91 |
| 52.159 | 614.07 | 50.562 | 593.08 |
| 52.151 | 614.24 | 50.555 | 593.25 |
| 52.142 | 614.41 | 50.545 | 593.42 |
| 52.137 | 614.59 | 50.535 | 593.59 |
| 52.131 | 614.76 | 50.527 | 593.76 |
| 52.123 | 614.93 | 50.522 | 593.93 |
| 52.114 | 615.1  | 50.51  | 594.11 |
| 52.106 | 615.27 | 50.505 | 594.28 |
| 52.094 | 615.44 | 50.495 | 594.45 |
| 52.089 | 615.61 | 50.488 | 594.62 |
| 52.08  | 615.78 | 50.483 | 594.79 |
| 52.072 | 615.95 | 50.476 | 594.96 |
| 52.066 | 616.12 | 50.471 | 595.13 |
| 52.061 | 616.29 | 50.458 | 595.3  |
| 52.055 | 616.46 | 50.451 | 595.47 |
| 52.049 | 616.63 | 50.446 | 595.64 |
| 52.044 | 616.8  | 50.438 | 595.82 |
| 52.035 | 616.98 | 50.429 | 595.99 |
| 52.03  | 617.15 | 50.419 | 596.16 |
| 52.024 | 617.32 | 50.411 | 596.33 |
| 52.018 | 617.49 | 50.406 | 596.5  |
| 52.01  | 617.66 | 50.401 | 596.67 |
| 52.004 | 617.83 | 50.396 | 596.84 |
| 51.999 | 618    | 50.387 | 597.01 |
| 51.99  | 618.17 | 50.379 | 597.18 |
| 51.979 | 618.34 | 50.369 | 597.36 |
| 51.976 | 618.51 | 50.367 | 597.53 |
| 51.965 | 618.68 | 50.357 | 597.7  |
| 51.956 | 618.85 | 50.345 | 597.87 |
| 51.953 | 619.02 | 50.34  | 598.04 |
| 51.945 | 619.2  | 50.33  | 598.21 |
| 51.937 | 619.37 | 50.325 | 598.38 |
| 51.928 | 619.54 | 50.322 | 598.55 |
| 51.92  | 619.71 | 50.312 | 598.72 |
| 51.914 | 619.88 | 50.3   | 598.9  |
| 51.908 | 620.05 | 50.293 | 599.07 |
| 51.9   | 620.22 | 50.285 | 599.24 |
| 51.891 | 620.39 | 50.275 | 599.41 |
| 51.883 | 620.56 | 50.266 | 599.58 |
| 51.877 | 620.73 | 50.258 | 599.75 |
| 51.869 | 620.9  | 50.243 | 599.92 |
| 51.86  | 621.07 | 50.238 | 600.09 |
| 51.855 | 621.24 | 50.228 | 600.26 |
| 51.849 | 621.41 | 50.224 | 600.43 |
| 51.841 | 621.58 | 50.214 | 600.6  |
| 51.838 | 621.75 | 50.206 | 600.78 |
| 51.829 | 621.92 | 50.201 | 600.95 |
| 51.824 | 622.09 | 50.191 | 601.12 |
| 51.815 | 622.26 | 50.184 | 601.29 |
| 51.807 | 622.43 | 50.179 | 601.46 |
| 51.801 | 622.6  | 50.174 | 601.63 |
| 51.793 | 622.78 | 50.169 | 601.8  |
| 51.787 | 622.95 | 50.162 | 601.98 |

|        |        |        |        |
|--------|--------|--------|--------|
| 51.781 | 623.11 | 50.154 | 602.15 |
| 51.776 | 623.28 | 50.147 | 602.32 |
| 51.765 | 623.45 | 50.135 | 602.49 |
| 51.753 | 623.62 | 50.13  | 602.66 |
| 51.745 | 623.79 | 50.122 | 602.83 |
| 51.734 | 623.96 | 50.11  | 603    |
| 51.728 | 624.13 | 50.103 | 603.17 |
| 51.722 | 624.3  | 50.095 | 603.34 |
| 51.717 | 624.47 | 50.09  | 603.52 |
| 51.708 | 624.64 | 50.088 | 603.69 |
| 51.7   | 624.81 | 50.078 | 603.86 |
| 51.688 | 624.98 | 50.068 | 604.03 |
| 51.68  | 625.15 | 50.058 | 604.2  |
| 51.674 | 625.32 | 50.051 | 604.37 |
| 51.669 | 625.49 | 50.048 | 604.54 |
| 51.66  | 625.66 | 50.041 | 604.72 |
| 51.655 | 625.83 | 50.033 | 604.89 |
| 51.646 | 626    | 50.023 | 605.06 |
| 51.638 | 626.17 | 50.016 | 605.23 |
| 51.626 | 626.34 | 50.009 | 605.4  |
| 51.615 | 626.51 | 50.001 | 605.57 |
| 51.607 | 626.68 | 49.996 | 605.74 |
| 51.604 | 626.85 | 49.991 | 605.91 |
| 51.595 | 627.02 | 49.984 | 606.08 |
| 51.59  | 627.19 | 49.977 | 606.26 |
| 51.587 | 627.36 | 49.969 | 606.43 |
| 51.576 | 627.53 | 49.964 | 606.6  |
| 51.57  | 627.7  | 49.959 | 606.77 |
| 51.556 | 627.87 | 49.952 | 606.94 |
| 51.55  | 628.04 | 49.939 | 607.11 |
| 51.545 | 628.21 | 49.932 | 607.28 |
| 51.536 | 628.38 | 49.922 | 607.46 |
| 51.528 | 628.55 | 49.91  | 607.63 |
| 51.517 | 628.72 | 49.907 | 607.8  |
| 51.508 | 628.89 | 49.895 | 607.97 |
| 51.5   | 629.05 | 49.89  | 608.14 |
| 51.491 | 629.22 | 49.883 | 608.31 |
| 51.486 | 629.39 | 49.875 | 608.48 |
| 51.48  | 629.56 | 49.873 | 608.66 |
| 51.471 | 629.73 | 49.868 | 608.83 |
| 51.466 | 629.9  | 49.863 | 609    |
| 51.457 | 630.07 | 49.851 | 609.17 |
| 51.455 | 630.24 | 49.841 | 609.34 |
| 51.449 | 630.41 | 49.836 | 609.51 |
| 51.44  | 630.58 | 49.823 | 609.68 |
| 51.432 | 630.75 | 49.816 | 609.86 |
| 51.421 | 630.92 | 49.811 | 610.03 |
| 51.412 | 631.09 | 49.801 | 610.2  |
| 51.407 | 631.26 | 49.796 | 610.37 |
| 51.401 | 631.43 | 49.789 | 610.54 |
| 51.395 | 631.6  | 49.781 | 610.71 |
| 51.392 | 631.76 | 49.776 | 610.88 |
| 51.381 | 631.93 | 49.772 | 611.06 |
| 51.367 | 632.1  | 49.764 | 611.23 |

|        |        |        |        |
|--------|--------|--------|--------|
| 51.359 | 632.27 | 49.759 | 611.4  |
| 51.35  | 632.44 | 49.752 | 611.57 |
| 51.342 | 632.61 | 49.744 | 611.74 |
| 51.333 | 632.78 | 49.739 | 611.91 |
| 51.322 | 632.95 | 49.732 | 612.08 |
| 51.316 | 633.12 | 49.722 | 612.26 |
| 51.311 | 633.29 | 49.717 | 612.43 |
| 51.302 | 633.46 | 49.71  | 612.6  |
| 51.294 | 633.63 | 49.702 | 612.77 |
| 51.285 | 633.8  | 49.692 | 612.94 |
| 51.277 | 633.97 | 49.688 | 613.11 |
| 51.266 | 634.14 | 49.68  | 613.28 |
| 51.26  | 634.31 | 49.675 | 613.45 |
| 51.252 | 634.48 | 49.665 | 613.63 |
| 51.243 | 634.65 | 49.653 | 613.8  |
| 51.237 | 634.81 | 49.648 | 613.97 |
| 51.229 | 634.98 | 49.643 | 614.14 |
| 51.221 | 635.15 | 49.636 | 614.31 |
| 51.212 | 635.32 | 49.631 | 614.48 |
| 51.206 | 635.49 | 49.623 | 614.65 |
| 51.201 | 635.66 | 49.618 | 614.83 |
| 51.195 | 635.83 | 49.611 | 615    |
| 51.19  | 636    | 49.606 | 615.17 |
| 51.175 | 636.17 | 49.596 | 615.34 |
| 51.164 | 636.34 | 49.589 | 615.51 |
| 51.156 | 636.51 | 49.579 | 615.68 |
| 51.15  | 636.68 | 49.574 | 615.85 |
| 51.136 | 636.85 | 49.569 | 616.02 |
| 51.128 | 637.02 | 49.562 | 616.2  |
| 51.116 | 637.19 | 49.554 | 616.37 |
| 51.105 | 637.36 | 49.544 | 616.54 |
| 51.102 | 637.53 | 49.539 | 616.71 |
| 51.091 | 637.7  | 49.529 | 616.88 |
| 51.085 | 637.87 | 49.52  | 617.05 |
| 51.082 | 638.04 | 49.515 | 617.22 |
| 51.077 | 638.2  | 49.505 | 617.4  |
| 51.071 | 638.37 | 49.5   | 617.57 |
| 51.063 | 638.54 | 49.492 | 617.74 |
| 51.049 | 638.71 | 49.485 | 617.91 |
| 51.037 | 638.88 | 49.475 | 618.08 |
| 51.026 | 639.05 | 49.47  | 618.25 |
| 51.018 | 639.22 | 49.465 | 618.42 |
| 51.009 | 639.39 | 49.458 | 618.6  |
| 50.998 | 639.56 | 49.45  | 618.77 |
| 50.989 | 639.73 | 49.445 | 618.94 |
| 50.981 | 639.9  | 49.441 | 619.11 |
| 50.97  | 640.07 | 49.431 | 619.28 |
| 50.967 | 640.24 | 49.423 | 619.45 |
| 50.956 | 640.41 | 49.418 | 619.63 |
| 50.947 | 640.58 | 49.411 | 619.8  |
| 50.941 | 640.75 | 49.406 | 619.97 |
| 50.933 | 640.92 | 49.399 | 620.14 |
| 50.922 | 641.09 | 49.394 | 620.31 |
| 50.908 | 641.26 | 49.384 | 620.49 |

|        |        |        |        |
|--------|--------|--------|--------|
| 50.896 | 641.43 | 49.376 | 620.66 |
| 50.891 | 641.6  | 49.369 | 620.83 |
| 50.882 | 641.77 | 49.364 | 621    |
| 50.879 | 641.94 | 49.357 | 621.17 |
| 50.871 | 642.11 | 49.354 | 621.34 |
| 50.857 | 642.28 | 49.342 | 621.51 |
| 50.846 | 642.45 | 49.334 | 621.68 |
| 50.837 | 642.62 | 49.329 | 621.86 |
| 50.832 | 642.78 | 49.324 | 622.03 |
| 50.826 | 642.95 | 49.317 | 622.2  |
| 50.817 | 643.12 | 49.307 | 622.37 |
| 50.806 | 643.29 | 49.3   | 622.54 |
| 50.795 | 643.46 | 49.292 | 622.71 |
| 50.781 | 643.63 | 49.287 | 622.88 |
| 50.772 | 643.8  | 49.282 | 623.05 |
| 50.764 | 643.97 | 49.275 | 623.22 |
| 50.758 | 644.14 | 49.268 | 623.4  |
| 50.753 | 644.31 | 49.26  | 623.57 |
| 50.741 | 644.48 | 49.255 | 623.74 |
| 50.736 | 644.65 | 49.248 | 623.91 |
| 50.727 | 644.82 | 49.24  | 624.08 |
| 50.719 | 644.99 | 49.233 | 624.25 |
| 50.713 | 645.16 | 49.228 | 624.42 |
| 50.702 | 645.33 | 49.223 | 624.59 |
| 50.691 | 645.5  | 49.218 | 624.76 |
| 50.677 | 645.67 | 49.213 | 624.93 |
| 50.665 | 645.84 | 49.206 | 625.1  |
| 50.654 | 646.01 | 49.198 | 625.27 |
| 50.648 | 646.18 | 49.193 | 625.44 |
| 50.643 | 646.35 | 49.186 | 625.61 |
| 50.637 | 646.52 | 49.179 | 625.78 |
| 50.62  | 646.69 | 49.174 | 625.96 |
| 50.614 | 646.86 | 49.169 | 626.13 |
| 50.609 | 647.03 | 49.164 | 626.3  |
| 50.598 | 647.2  | 49.156 | 626.47 |
| 50.586 | 647.37 | 49.151 | 626.64 |
| 50.575 | 647.54 | 49.144 | 626.81 |
| 50.564 | 647.7  | 49.137 | 626.98 |
| 50.55  | 647.87 | 49.129 | 627.15 |
| 50.541 | 648.04 | 49.124 | 627.32 |
| 50.536 | 648.21 | 49.117 | 627.49 |
| 50.527 | 648.38 | 49.11  | 627.66 |
| 50.516 | 648.55 | 49.105 | 627.83 |
| 50.507 | 648.72 | 49.097 | 628    |
| 50.496 | 648.89 | 49.092 | 628.17 |
| 50.488 | 649.06 | 49.087 | 628.34 |
| 50.482 | 649.23 | 49.08  | 628.51 |
| 50.471 | 649.4  | 49.07  | 628.68 |
| 50.459 | 649.57 | 49.063 | 628.85 |
| 50.454 | 649.74 | 49.055 | 629.02 |
| 50.445 | 649.91 | 49.053 | 629.19 |
| 50.437 | 650.08 | 49.045 | 629.36 |
| 50.428 | 650.25 | 49.04  | 629.54 |
| 50.414 | 650.42 | 49.035 | 629.71 |

|        |        |        |        |
|--------|--------|--------|--------|
| 50.403 | 650.59 | 49.028 | 629.88 |
| 50.389 | 650.76 | 49.021 | 630.05 |
| 50.383 | 650.93 | 49.016 | 630.22 |
| 50.369 | 651.1  | 49.008 | 630.39 |
| 50.364 | 651.27 | 49.003 | 630.56 |
| 50.355 | 651.44 | 48.996 | 630.73 |
| 50.347 | 651.61 | 48.991 | 630.9  |
| 50.338 | 651.78 | 48.984 | 631.07 |
| 50.33  | 651.95 | 48.976 | 631.24 |
| 50.316 | 652.12 | 48.971 | 631.41 |
| 50.307 | 652.29 | 48.964 | 631.58 |
| 50.302 | 652.46 | 48.959 | 631.75 |
| 50.293 | 652.63 | 48.956 | 631.92 |
| 50.282 | 652.8  | 48.951 | 632.09 |
| 50.276 | 652.97 | 48.944 | 632.26 |
| 50.265 | 653.14 | 48.942 | 632.43 |
| 50.254 | 653.31 | 48.934 | 632.6  |
| 50.24  | 653.48 | 48.929 | 632.77 |
| 50.237 | 653.65 | 48.922 | 632.94 |
| 50.226 | 653.82 | 48.914 | 633.11 |
| 50.217 | 653.99 | 48.909 | 633.28 |
| 50.2   | 654.16 | 48.904 | 633.45 |
| 50.192 | 654.33 | 48.897 | 633.62 |
| 50.178 | 654.5  | 48.892 | 633.79 |
| 50.166 | 654.67 | 48.885 | 633.96 |
| 50.155 | 654.84 | 48.875 | 634.13 |
| 50.147 | 655.01 | 48.87  | 634.3  |
| 50.138 | 655.18 | 48.862 | 634.47 |
| 50.13  | 655.34 | 48.858 | 634.64 |
| 50.121 | 655.51 | 48.85  | 634.81 |
| 50.116 | 655.68 | 48.845 | 634.98 |
| 50.099 | 655.85 | 48.84  | 635.15 |
| 50.093 | 656.02 | 48.835 | 635.32 |
| 50.082 | 656.19 | 48.83  | 635.49 |
| 50.07  | 656.36 | 48.825 | 635.67 |
| 50.059 | 656.53 | 48.818 | 635.84 |
| 50.051 | 656.7  | 48.811 | 636.01 |
| 50.039 | 656.87 | 48.806 | 636.18 |
| 50.031 | 657.04 | 48.798 | 636.35 |
| 50.02  | 657.21 | 48.793 | 636.52 |
| 50.008 | 657.38 | 48.786 | 636.69 |
| 49.997 | 657.55 | 48.783 | 636.86 |
| 49.986 | 657.72 | 48.781 | 637.03 |
| 49.983 | 657.89 | 48.776 | 637.2  |
| 49.975 | 658.06 | 48.769 | 637.37 |
| 49.966 | 658.23 | 48.764 | 637.54 |
| 49.958 | 658.4  | 48.756 | 637.71 |
| 49.944 | 658.57 | 48.749 | 637.88 |
| 49.93  | 658.74 | 48.739 | 638.05 |
| 49.921 | 658.91 | 48.732 | 638.22 |
| 49.91  | 659.08 | 48.729 | 638.39 |
| 49.899 | 659.25 | 48.722 | 638.56 |
| 49.89  | 659.42 | 48.719 | 638.73 |
| 49.876 | 659.59 | 48.714 | 638.9  |

|         |         |         |         |
|---------|---------|---------|---------|
| 49. 87  | 659. 76 | 48. 709 | 639. 07 |
| 49. 862 | 659. 93 | 48. 702 | 639. 24 |
| 49. 848 | 660. 1  | 48. 697 | 639. 41 |
| 49. 837 | 660. 27 | 48. 687 | 639. 58 |
| 49. 822 | 660. 44 | 48. 682 | 639. 75 |
| 49. 811 | 660. 61 | 48. 675 | 639. 92 |
| 49. 803 | 660. 78 | 48. 67  | 640. 09 |
| 49. 794 | 660. 95 | 48. 665 | 640. 26 |
| 49. 783 | 661. 12 | 48. 657 | 640. 43 |
| 49. 777 | 661. 29 | 48. 653 | 640. 61 |
| 49. 766 | 661. 46 | 48. 648 | 640. 78 |
| 49. 76  | 661. 63 | 48. 64  | 640. 95 |
| 49. 746 | 661. 8  | 48. 635 | 641. 12 |
| 49. 732 | 661. 97 | 48. 63  | 641. 29 |
| 49. 721 | 662. 14 | 48. 625 | 641. 46 |
| 49. 71  | 662. 31 | 48. 62  | 641. 63 |
| 49. 701 | 662. 48 | 48. 618 | 641. 8  |
| 49. 69  | 662. 65 | 48. 615 | 641. 97 |
| 49. 681 | 662. 82 | 48. 608 | 642. 14 |
| 49. 673 | 662. 99 | 48. 601 | 642. 31 |
| 49. 662 | 663. 16 | 48. 596 | 642. 48 |
| 49. 653 | 663. 33 | 48. 586 | 642. 65 |
| 49. 645 | 663. 5  | 48. 581 | 642. 82 |
| 49. 639 | 663. 67 | 48. 573 | 642. 99 |
| 49. 622 | 663. 84 | 48. 569 | 643. 16 |
| 49. 614 | 664. 01 | 48. 564 | 643. 33 |
| 49. 6   | 664. 18 | 48. 554 | 643. 5  |
| 49. 586 | 664. 35 | 48. 549 | 643. 67 |
| 49. 574 | 664. 52 | 48. 541 | 643. 84 |
| 49. 563 | 664. 69 | 48. 534 | 644. 01 |
| 49. 557 | 664. 86 | 48. 529 | 644. 18 |
| 49. 541 | 665. 03 | 48. 522 | 644. 35 |
| 49. 535 | 665. 2  | 48. 517 | 644. 52 |
| 49. 526 | 665. 37 | 48. 509 | 644. 69 |
| 49. 515 | 665. 54 | 48. 507 | 644. 86 |
| 49. 51  | 665. 71 | 48. 497 | 645. 04 |
| 49. 495 | 665. 88 | 48. 492 | 645. 21 |
| 49. 481 | 666. 05 | 48. 487 | 645. 38 |
| 49. 47  | 666. 22 | 48. 485 | 645. 55 |
| 49. 459 | 666. 39 | 48. 48  | 645. 72 |
| 49. 45  | 666. 56 | 48. 472 | 645. 89 |
| 49. 442 | 666. 73 | 48. 467 | 646. 06 |
| 49. 431 | 666. 9  | 48. 462 | 646. 23 |
| 49. 419 | 667. 07 | 48. 455 | 646. 4  |
| 49. 405 | 667. 24 | 48. 45  | 646. 57 |
| 49. 4   | 667. 41 | 48. 445 | 646. 74 |
| 49. 388 | 667. 58 | 48. 44  | 646. 91 |
| 49. 374 | 667. 76 | 48. 438 | 647. 08 |
| 49. 36  | 667. 92 | 48. 433 | 647. 25 |
| 49. 346 | 668. 1  | 48. 423 | 647. 42 |
| 49. 335 | 668. 27 | 48. 42  | 647. 59 |
| 49. 326 | 668. 44 | 48. 418 | 647. 76 |
| 49. 318 | 668. 61 | 48. 41  | 647. 93 |
| 49. 312 | 668. 78 | 48. 406 | 648. 1  |



|        |        |        |        |
|--------|--------|--------|--------|
| 49.304 | 668.95 | 48.403 | 648.27 |
| 49.292 | 669.12 | 48.398 | 648.44 |
| 49.284 | 669.29 | 48.391 | 648.61 |
| 49.276 | 669.46 | 48.386 | 648.78 |
| 49.261 | 669.63 | 48.381 | 648.95 |
| 49.247 | 669.8  | 48.368 | 649.12 |
| 49.236 | 669.97 | 48.361 | 649.29 |
| 49.228 | 670.14 | 48.359 | 649.47 |
| 49.222 | 670.31 | 48.351 | 649.64 |
| 49.211 | 670.48 | 48.346 | 649.81 |
| 49.197 | 670.65 | 48.341 | 649.98 |
| 49.183 | 670.82 | 48.336 | 650.15 |
| 49.174 | 670.99 | 48.334 | 650.32 |
| 49.168 | 671.16 | 48.326 | 650.49 |
| 49.152 | 671.33 | 48.319 | 650.66 |
| 49.137 | 671.5  | 48.314 | 650.83 |
| 49.123 | 671.67 | 48.312 | 651    |
| 49.109 | 671.84 | 48.304 | 651.17 |
| 49.101 | 672.01 | 48.297 | 651.34 |
| 49.092 | 672.18 | 48.292 | 651.52 |
| 49.081 | 672.35 | 48.287 | 651.69 |
| 49.067 | 672.52 | 48.28  | 651.86 |
| 49.059 | 672.69 | 48.272 | 652.03 |
| 49.05  | 672.86 | 48.267 | 652.2  |
| 49.036 | 673.03 | 48.26  | 652.37 |
| 49.022 | 673.2  | 48.257 | 652.54 |
| 49.011 | 673.38 | 48.252 | 652.71 |
| 49.002 | 673.55 | 48.247 | 652.88 |
| 48.997 | 673.72 | 48.242 | 653.05 |
| 48.985 | 673.89 | 48.24  | 653.22 |
| 48.968 | 674.06 | 48.235 | 653.39 |
| 48.951 | 674.23 | 48.23  | 653.57 |
| 48.94  | 674.4  | 48.225 | 653.74 |
| 48.934 | 674.57 | 48.223 | 653.91 |
| 48.929 | 674.74 | 48.215 | 654.08 |
| 48.918 | 674.91 | 48.21  | 654.25 |
| 48.901 | 675.08 | 48.208 | 654.42 |
| 48.884 | 675.25 | 48.2   | 654.59 |
| 48.872 | 675.42 | 48.196 | 654.76 |
| 48.864 | 675.59 | 48.188 | 654.93 |
| 48.85  | 675.76 | 48.181 | 655.1  |
| 48.844 | 675.93 | 48.176 | 655.27 |
| 48.833 | 676.1  | 48.168 | 655.45 |
| 48.822 | 676.27 | 48.163 | 655.62 |
| 48.81  | 676.44 | 48.158 | 655.79 |
| 48.799 | 676.61 | 48.154 | 655.96 |
| 48.788 | 676.78 | 48.149 | 656.13 |
| 48.779 | 676.95 | 48.144 | 656.3  |
| 48.771 | 677.12 | 48.136 | 656.47 |
| 48.76  | 677.29 | 48.131 | 656.64 |
| 48.751 | 677.46 | 48.126 | 656.81 |
| 48.737 | 677.64 | 48.124 | 656.98 |
| 48.726 | 677.81 | 48.116 | 657.15 |
| 48.715 | 677.98 | 48.112 | 657.32 |

|        |        |        |        |
|--------|--------|--------|--------|
| 48.706 | 678.15 | 48.104 | 657.5  |
| 48.695 | 678.32 | 48.099 | 657.67 |
| 48.675 | 678.49 | 48.094 | 657.84 |
| 48.661 | 678.66 | 48.089 | 658.01 |
| 48.655 | 678.83 | 48.087 | 658.18 |
| 48.644 | 679    | 48.082 | 658.35 |
| 48.636 | 679.17 | 48.077 | 658.52 |
| 48.619 | 679.34 | 48.075 | 658.69 |
| 48.605 | 679.51 | 48.072 | 658.86 |
| 48.593 | 679.68 | 48.065 | 659.03 |
| 48.591 | 679.85 | 48.057 | 659.2  |
| 48.577 | 680.02 | 48.052 | 659.38 |
| 48.562 | 680.19 | 48.05  | 659.55 |
| 48.551 | 680.36 | 48.042 | 659.72 |
| 48.543 | 680.53 | 48.035 | 659.89 |
| 48.534 | 680.71 | 48.03  | 660.06 |
| 48.523 | 680.88 | 48.028 | 660.23 |
| 48.503 | 681.05 | 48.02  | 660.4  |
| 48.489 | 681.22 | 48.013 | 660.57 |
| 48.483 | 681.39 | 48.005 | 660.74 |
| 48.469 | 681.56 | 47.998 | 660.91 |
| 48.464 | 681.73 | 47.991 | 661.08 |
| 48.444 | 681.9  | 47.988 | 661.26 |
| 48.433 | 682.07 | 47.983 | 661.43 |
| 48.421 | 682.24 | 47.978 | 661.6  |
| 48.416 | 682.41 | 47.973 | 661.77 |
| 48.405 | 682.58 | 47.973 | 661.94 |
| 48.39  | 682.75 | 47.966 | 662.11 |
| 48.376 | 682.92 | 47.961 | 662.28 |
| 48.362 | 683.09 | 47.958 | 662.45 |
| 48.354 | 683.26 | 47.949 | 662.62 |
| 48.345 | 683.44 | 47.946 | 662.79 |
| 48.328 | 683.61 | 47.939 | 662.97 |
| 48.314 | 683.78 | 47.934 | 663.14 |
| 48.303 | 683.95 | 47.929 | 663.31 |
| 48.303 | 684.12 | 47.924 | 663.48 |
| 48.289 | 684.29 | 47.916 | 663.65 |
| 48.275 | 684.46 | 47.911 | 663.82 |
| 48.258 | 684.63 | 47.909 | 663.99 |
| 48.247 | 684.8  | 47.904 | 664.16 |
| 48.238 | 684.97 | 47.897 | 664.33 |
| 48.23  | 685.14 | 47.894 | 664.51 |
| 48.221 | 685.31 | 47.889 | 664.68 |
| 48.213 | 685.48 | 47.884 | 664.85 |
| 48.199 | 685.65 | 47.879 | 665.02 |
| 48.19  | 685.82 | 47.872 | 665.19 |
| 48.171 | 685.99 | 47.869 | 665.36 |
| 48.154 | 686.16 | 47.867 | 665.53 |
| 48.145 | 686.34 | 47.862 | 665.7  |
| 48.137 | 686.51 | 47.857 | 665.87 |
| 48.123 | 686.68 | 47.852 | 666.05 |
| 48.111 | 686.85 | 47.847 | 666.22 |
| 48.103 | 687.02 | 47.845 | 666.39 |
| 48.089 | 687.19 | 47.842 | 666.56 |

|        |        |        |        |
|--------|--------|--------|--------|
| 48.078 | 687.36 | 47.837 | 666.73 |
| 48.061 | 687.53 | 47.835 | 666.9  |
| 48.052 | 687.7  | 47.832 | 667.07 |
| 48.041 | 687.87 | 47.827 | 667.24 |
| 48.03  | 688.04 | 47.823 | 667.42 |
| 48.021 | 688.21 | 47.815 | 667.59 |
| 48.013 | 688.38 | 47.813 | 667.76 |
| 48.001 | 688.55 | 47.805 | 667.93 |
| 47.99  | 688.73 | 47.8   | 668.1  |
| 47.979 | 688.9  | 47.798 | 668.27 |
| 47.968 | 689.07 | 47.793 | 668.44 |
| 47.956 | 689.24 | 47.79  | 668.62 |
| 47.948 | 689.41 | 47.783 | 668.79 |
| 47.937 | 689.58 | 47.778 | 668.96 |
| 47.931 | 689.75 | 47.768 | 669.13 |
| 47.92  | 689.92 | 47.763 | 669.3  |
| 47.897 | 690.09 | 47.758 | 669.47 |
| 47.886 | 690.26 | 47.753 | 669.64 |
| 47.877 | 690.43 | 47.748 | 669.81 |
| 47.869 | 690.6  | 47.743 | 669.99 |
| 47.852 | 690.78 | 47.741 | 670.16 |
| 47.841 | 690.95 | 47.736 | 670.33 |
| 47.83  | 691.12 | 47.731 | 670.5  |
| 47.821 | 691.29 | 47.726 | 670.67 |
| 47.804 | 691.46 | 47.719 | 670.84 |
| 47.793 | 691.63 | 47.716 | 671.01 |
| 47.784 | 691.8  | 47.711 | 671.18 |
| 47.773 | 691.97 | 47.706 | 671.36 |
| 47.759 | 692.14 | 47.702 | 671.53 |
| 47.745 | 692.31 | 47.694 | 671.7  |
| 47.731 | 692.48 | 47.692 | 671.87 |
| 47.717 | 692.65 | 47.684 | 672.04 |
| 47.705 | 692.83 | 47.679 | 672.21 |
| 47.694 | 693    | 47.674 | 672.38 |
| 47.674 | 693.17 | 47.672 | 672.55 |
| 47.663 | 693.34 | 47.669 | 672.72 |
| 47.655 | 693.51 | 47.664 | 672.9  |
| 47.652 | 693.68 | 47.657 | 673.07 |
| 47.638 | 693.85 | 47.655 | 673.24 |
| 47.624 | 694.02 | 47.652 | 673.41 |
| 47.607 | 694.19 | 47.645 | 673.58 |
| 47.596 | 694.36 | 47.642 | 673.75 |
| 47.587 | 694.53 | 47.64  | 673.92 |
| 47.581 | 694.7  | 47.635 | 674.1  |
| 47.57  | 694.88 | 47.632 | 674.27 |
| 47.559 | 695.05 | 47.627 | 674.44 |
| 47.542 | 695.22 | 47.625 | 674.61 |
| 47.534 | 695.39 | 47.62  | 674.78 |
| 47.522 | 695.56 | 47.613 | 674.95 |
| 47.508 | 695.73 | 47.615 | 675.12 |
| 47.5   | 695.9  | 47.608 | 675.3  |
| 47.477 | 696.07 | 47.603 | 675.47 |
| 47.472 | 696.24 | 47.598 | 675.64 |
| 47.46  | 696.42 | 47.593 | 675.81 |

|         |         |         |         |
|---------|---------|---------|---------|
| 47. 452 | 696. 59 | 47. 588 | 675. 98 |
| 47. 441 | 696. 76 | 47. 583 | 676. 15 |
| 47. 426 | 696. 93 | 47. 578 | 676. 32 |
| 47. 418 | 697. 1  | 47. 573 | 676. 5  |
| 47. 404 | 697. 27 | 47. 563 | 676. 67 |
| 47. 395 | 697. 44 | 47. 558 | 676. 84 |
| 47. 384 | 697. 61 | 47. 551 | 677. 01 |
| 47. 367 | 697. 78 | 47. 546 | 677. 18 |
| 47. 359 | 697. 95 | 47. 541 | 677. 35 |
| 47. 345 | 698. 12 | 47. 541 | 677. 53 |
| 47. 333 | 698. 29 | 47. 536 | 677. 7  |
| 47. 322 | 698. 47 | 47. 531 | 677. 87 |
| 47. 314 | 698. 64 | 47. 529 | 678. 04 |
| 47. 3   | 698. 81 | 47. 524 | 678. 21 |
|         | 698. 81 | 47. 524 | 678. 38 |
|         |         |         | 678. 55 |
|         |         |         | 678. 73 |
|         |         |         | 678. 9  |
|         |         |         | 679. 07 |
|         |         |         | 679. 24 |
|         |         |         | 679. 41 |
|         |         |         | 679. 58 |
|         |         |         | 679. 75 |
|         |         |         | 679. 93 |
|         |         |         | 680. 1  |
|         |         |         | 680. 27 |
|         |         |         | 680. 44 |
|         |         |         | 680. 61 |
|         |         |         | 680. 78 |
|         |         |         | 680. 96 |
|         |         |         | 681. 13 |
|         |         |         | 681. 3  |
|         |         |         | 681. 47 |
|         |         |         | 681. 64 |
|         |         |         | 681. 81 |
|         |         |         | 681. 98 |
|         |         |         | 682. 15 |
|         |         |         | 682. 33 |
|         |         |         | 682. 5  |
|         |         |         | 682. 67 |
|         |         |         | 682. 84 |
|         |         |         | 683. 01 |
|         |         |         | 683. 18 |
|         |         |         | 683. 35 |
|         |         |         | 683. 53 |
|         |         |         | 683. 7  |
|         |         |         | 683. 87 |
|         |         |         | 684. 04 |
|         |         |         | 684. 21 |
|         |         |         | 684. 38 |
|         |         |         | 684. 56 |
|         |         |         | 684. 73 |
|         |         |         | 684. 9  |
|         |         |         | 685. 07 |

685. 24  
685. 42  
685. 59  
685. 76  
685. 93  
686. 1  
686. 28  
686. 45  
686. 62  
686. 79  
686. 96  
687. 13  
687. 3  
687. 48  
687. 65  
687. 82  
687. 99  
688. 16  
688. 33  
688. 5  
688. 67  
688. 85  
689. 02  
689. 19  
689. 36  
689. 53  
689. 7  
689. 88  
690. 05  
690. 22  
690. 39  
690. 56  
690. 73  
690. 9  
691. 08  
691. 25  
691. 42  
691. 59  
691. 76  
691. 93  
692. 1  
692. 28  
692. 45  
692. 62  
692. 79  
692. 96  
693. 13  
693. 31  
693. 48  
693. 65  
693. 82  
693. 99  
694. 16  
694. 33

694. 51  
694. 68  
694. 85  
695. 02  
695. 19  
695. 36  
695. 53  
695. 71  
695. 88  
696. 05  
696. 22  
696. 39  
696. 56  
696. 74  
696. 91  
697. 08  
697. 25  
697. 42  
697. 59  
697. 77  
697. 94  
698. 11  
698. 28  
698. 45  
698. 62  
698. 79

| 0                 |             | 5                 |             | 10                |
|-------------------|-------------|-------------------|-------------|-------------------|
| Derivation Weight | Temperature | Derivation Weight | Temperature | Derivation Weight |
| -0.49756          | 48.74       | 1.107             | 49.08       | 0.00845           |
| -0.49756          | 48.76       | -0.564            | 49.09       | -0.074            |
| -0.50088          | 48.78       | -0.774            | 49.1        | -0.109            |
| -0.48131          | 48.8        | -0.86             | 49.11       | -0.127            |
| -0.54606          | 48.82       | -0.893            | 49.12       | -0.135            |
| -0.6357           | 48.83       | -0.884            | 49.13       | -0.139            |
| -0.67354          | 48.85       | -0.896            | 49.14       | -0.143            |
| -0.59057          | 48.87       | -0.88             | 49.15       | -0.146            |
| -0.51189          | 48.89       | -0.871            | 49.16       | -0.147            |
| -0.4779           | 48.91       | -0.869            | 49.17       | -0.149            |
| -0.52071          | 48.93       | -0.869            | 49.18       | -0.15             |
| -0.51518          | 48.94       | -0.875            | 49.19       | -0.151            |
| -0.51401          | 48.96       | -0.879            | 49.2        | -0.152            |
| -0.47154          | 48.98       | -0.876            | 49.21       | -0.153            |
| -0.42532          | 49          | -0.866            | 49.23       | -0.155            |
| -0.38238          | 49.03       | -0.868            | 49.24       | -0.157            |
| -0.36919          | 49.05       | -0.867            | 49.26       | -0.164            |
| -0.37488          | 49.08       | -0.867            | 49.28       | -0.167            |
| -0.41451          | 49.11       | -0.869            | 49.3        | -0.169            |
| -0.42689          | 49.14       | -0.871            | 49.33       | -0.171            |
| -0.48506          | 49.17       | -0.872            | 49.36       | -0.172            |
| -0.51709          | 49.21       | -0.877            | 49.39       | -0.174            |
| -0.50627          | 49.25       | -0.875            | 49.42       | -0.175            |
| -0.43952          | 49.29       | -0.873            | 49.46       | -0.177            |
| -0.42102          | 49.34       | -0.87             | 49.49       | -0.18             |
| -0.45904          | 49.38       | -0.868            | 49.53       | -0.182            |
| -0.47256          | 49.43       | -0.91             | 49.58       | -0.185            |
| -0.43709          | 49.48       | -0.891            | 49.62       | -0.188            |
| -0.42706          | 49.54       | -0.892            | 49.67       | -0.191            |
| -0.44317          | 49.59       | -0.885            | 49.72       | -0.194            |
| -0.46164          | 49.65       | -0.88             | 49.77       | -0.197            |
| -0.43339          | 49.71       | -0.876            | 49.82       | -0.2              |
| -0.42049          | 49.77       | -0.873            | 49.88       | -0.204            |
| -0.45306          | 49.83       | -0.87             | 49.93       | -0.208            |
| -0.48121          | 49.9        | -0.868            | 49.99       | -0.211            |
| -0.46947          | 49.96       | -0.868            | 50.05       | -0.215            |
| -0.42134          | 50.03       | -0.869            | 50.11       | -0.219            |
| -0.39676          | 50.1        | -0.87             | 50.18       | -0.223            |
| -0.43429          | 50.17       | -0.871            | 50.24       | -0.227            |
| -0.48432          | 50.24       | -0.873            | 50.31       | -0.231            |
| -0.49254          | 50.32       | -0.876            | 50.37       | -0.235            |
| -0.43354          | 50.39       | -0.88             | 50.44       | -0.239            |
| -0.34742          | 50.47       | -0.883            | 50.51       | -0.243            |
| -0.34029          | 50.54       | -0.884            | 50.59       | -0.247            |
| -0.38301          | 50.62       | -0.885            | 50.66       | -0.251            |
| -0.46874          | 50.7        | -0.884            | 50.73       | -0.254            |
| -0.49012          | 50.78       | -0.882            | 50.81       | -0.258            |
| -0.48434          | 50.87       | -0.878            | 50.89       | -0.261            |
| -0.44566          | 50.95       | -0.876            | 50.97       | -0.265            |
| -0.43113          | 51.04       | -0.875            | 51.05       | -0.268            |
| -0.44703          | 51.12       | -0.876            | 51.13       | -0.271            |
| -0.45327          | 51.21       | -0.879            | 51.21       | -0.274            |

|          |       |        |       |        |
|----------|-------|--------|-------|--------|
| -0.47031 | 51.3  | -0.882 | 51.29 | -0.277 |
| -0.42388 | 51.39 | -0.887 | 51.38 | -0.28  |
| -0.40871 | 51.48 | -0.89  | 51.47 | -0.282 |
| -0.39473 | 51.57 | -0.89  | 51.55 | -0.285 |
| -0.43767 | 51.67 | -0.889 | 51.64 | -0.288 |
| -0.46137 | 51.76 | -0.888 | 51.73 | -0.29  |
| -0.4465  | 51.86 | -0.888 | 51.82 | -0.293 |
| -0.37297 | 51.95 | -0.888 | 51.91 | -0.296 |
| -0.36922 | 52.05 | -0.889 | 52.01 | -0.298 |
| -0.40783 | 52.15 | -0.89  | 52.1  | -0.301 |
| -0.46125 | 52.25 | -0.892 | 52.2  | -0.303 |
| -0.43487 | 52.35 | -0.894 | 52.29 | -0.305 |
| -0.36    | 52.45 | -0.896 | 52.39 | -0.308 |
| -0.36961 | 52.55 | -0.898 | 52.49 | -0.31  |
| -0.39106 | 52.66 | -0.898 | 52.59 | -0.312 |
| -0.44238 | 52.76 | -0.895 | 52.69 | -0.314 |
| -0.44698 | 52.87 | -0.894 | 52.79 | -0.316 |
| -0.42334 | 52.98 | -0.898 | 52.89 | -0.318 |
| -0.40825 | 53.08 | -0.903 | 53    | -0.32  |
| -0.41709 | 53.19 | -0.907 | 53.1  | -0.322 |
| -0.42413 | 53.3  | -0.91  | 53.21 | -0.324 |
| -0.43195 | 53.41 | -0.913 | 53.31 | -0.326 |
| -0.40938 | 53.52 | -0.916 | 53.42 | -0.327 |
| -0.43728 | 53.63 | -0.921 | 53.53 | -0.329 |
| -0.42541 | 53.75 | -0.923 | 53.64 | -0.331 |
| -0.41369 | 53.86 | -0.924 | 53.75 | -0.333 |
| -0.39239 | 53.98 | -0.924 | 53.86 | -0.335 |
| -0.38313 | 54.09 | -0.925 | 53.97 | -0.337 |
| -0.4218  | 54.21 | -0.929 | 54.08 | -0.339 |
| -0.43265 | 54.32 | -0.936 | 54.2  | -0.341 |
| -0.42233 | 54.44 | -0.941 | 54.31 | -0.343 |
| -0.3886  | 54.56 | -0.943 | 54.43 | -0.345 |
| -0.40002 | 54.68 | -0.945 | 54.54 | -0.347 |
| -0.49374 | 54.8  | -0.949 | 54.66 | -0.349 |
| -0.51809 | 54.92 | -0.953 | 54.78 | -0.351 |
| -0.52014 | 55.04 | -0.954 | 54.9  | -0.354 |
| -0.46406 | 55.16 | -0.951 | 55.01 | -0.356 |
| -0.39288 | 55.29 | -0.951 | 55.13 | -0.359 |
| -0.33193 | 55.41 | -0.953 | 55.25 | -0.361 |
| -0.3138  | 55.53 | -0.956 | 55.38 | -0.364 |
| -0.37196 | 55.66 | -0.956 | 55.5  | -0.367 |
| -0.43569 | 55.79 | -0.956 | 55.62 | -0.37  |
| -0.50684 | 55.91 | -0.958 | 55.74 | -0.373 |
| -0.5494  | 56.04 | -0.96  | 55.87 | -0.376 |
| -0.5131  | 56.17 | -0.964 | 55.99 | -0.38  |
| -0.42745 | 56.29 | -0.967 | 56.12 | -0.383 |
| -0.38979 | 56.42 | -0.972 | 56.24 | -0.387 |
| -0.46132 | 56.55 | -0.978 | 56.37 | -0.391 |
| -0.52681 | 56.68 | -0.983 | 56.5  | -0.395 |
| -0.49616 | 56.81 | -0.986 | 56.62 | -0.399 |
| -0.43513 | 56.94 | -0.987 | 56.75 | -0.403 |
| -0.39623 | 57.08 | -0.99  | 56.88 | -0.407 |
| -0.46813 | 57.21 | -0.993 | 57.01 | -0.412 |
| -0.50889 | 57.34 | -0.996 | 57.14 | -0.416 |



|          |       |        |       |        |
|----------|-------|--------|-------|--------|
| -0.50489 | 57.47 | -0.998 | 57.27 | -0.42  |
| -0.425   | 57.61 | -1     | 57.4  | -0.425 |
| -0.40192 | 57.74 | -1.003 | 57.53 | -0.429 |
| -0.4145  | 57.88 | -1.009 | 57.67 | -0.434 |
| -0.43694 | 58.01 | -1.015 | 57.8  | -0.438 |
| -0.43831 | 58.15 | -1.02  | 57.93 | -0.443 |
| -0.49382 | 58.29 | -1.025 | 58.07 | -0.447 |
| -0.51017 | 58.42 | -1.028 | 58.2  | -0.451 |
| -0.5418  | 58.56 | -1.029 | 58.34 | -0.456 |
| -0.5096  | 58.7  | -1.03  | 58.47 | -0.46  |
| -0.50285 | 58.84 | -1.03  | 58.61 | -0.465 |
| -0.48212 | 58.98 | -1.034 | 58.74 | -0.469 |
| -0.5015  | 59.11 | -1.036 | 58.88 | -0.473 |
| -0.5082  | 59.25 | -1.039 | 59.02 | -0.477 |
| -0.49252 | 59.4  | -1.042 | 59.16 | -0.482 |
| -0.45722 | 59.54 | -1.045 | 59.3  | -0.486 |
| -0.47754 | 59.68 | -1.046 | 59.43 | -0.49  |
| -0.47156 | 59.82 | -1.046 | 59.57 | -0.494 |
| -0.42036 | 59.96 | -1.048 | 59.71 | -0.497 |
| -0.40129 | 60.1  | -1.053 | 59.85 | -0.501 |
| -0.42008 | 60.25 | -1.058 | 59.99 | -0.505 |
| -0.47309 | 60.39 | -1.06  | 60.13 | -0.509 |
| -0.48148 | 60.53 | -1.061 | 60.28 | -0.512 |
| -0.51135 | 60.68 | -1.062 | 60.42 | -0.516 |
| -0.48417 | 60.82 | -1.066 | 60.56 | -0.519 |
| -0.44788 | 60.97 | -1.07  | 60.7  | -0.523 |
| -0.45908 | 61.11 | -1.07  | 60.85 | -0.526 |
| -0.56982 | 61.26 | -1.069 | 60.99 | -0.53  |
| -0.67382 | 61.4  | -1.07  | 61.13 | -0.534 |
| -0.60963 | 61.55 | -1.073 | 61.28 | -0.537 |
| -0.53068 | 61.69 | -1.073 | 61.42 | -0.541 |
| -0.45827 | 61.84 | -1.073 | 61.57 | -0.545 |
| -0.48339 | 61.99 | -1.076 | 61.71 | -0.548 |
| -0.51142 | 62.14 | -1.082 | 61.86 | -0.552 |
| -0.51375 | 62.28 | -1.085 | 62    | -0.556 |
| -0.53409 | 62.43 | -1.087 | 62.15 | -0.56  |
| -0.5562  | 62.58 | -1.089 | 62.3  | -0.564 |
| -0.53318 | 62.73 | -1.092 | 62.44 | -0.568 |
| -0.51409 | 62.88 | -1.095 | 62.59 | -0.571 |
| -0.50103 | 63.03 | -1.098 | 62.74 | -0.575 |
| -0.58316 | 63.18 | -1.099 | 62.89 | -0.579 |
| -0.64176 | 63.33 | -1.102 | 63.03 | -0.582 |
| -0.59859 | 63.48 | -1.106 | 63.18 | -0.586 |
| -0.54826 | 63.63 | -1.107 | 63.33 | -0.589 |
| -0.53089 | 63.78 | -1.106 | 63.48 | -0.592 |
| -0.5628  | 63.93 | -1.105 | 63.63 | -0.595 |
| -0.56571 | 64.08 | -1.109 | 63.78 | -0.598 |
| -0.57167 | 64.23 | -1.114 | 63.93 | -0.601 |
| -0.53397 | 64.38 | -1.115 | 64.08 | -0.604 |
| -0.54654 | 64.54 | -1.117 | 64.23 | -0.606 |
| -0.53653 | 64.69 | -1.118 | 64.38 | -0.609 |
| -0.56159 | 64.84 | -1.121 | 64.53 | -0.611 |
| -0.56925 | 64.99 | -1.123 | 64.68 | -0.613 |
| -0.55688 | 65.15 | -1.125 | 64.84 | -0.616 |

|          |       |        |       |        |
|----------|-------|--------|-------|--------|
| -0.58248 | 65.3  | -1.127 | 64.99 | -0.618 |
| -0.62592 | 65.46 | -1.129 | 65.14 | -0.62  |
| -0.62414 | 65.61 | -1.129 | 65.29 | -0.622 |
| -0.58437 | 65.76 | -1.126 | 65.44 | -0.624 |
| -0.54721 | 65.92 | -1.124 | 65.6  | -0.626 |
| -0.57859 | 66.07 | -1.123 | 65.75 | -0.628 |
| -0.61658 | 66.23 | -1.126 | 65.9  | -0.63  |
| -0.58633 | 66.38 | -1.13  | 66.06 | -0.632 |
| -0.53746 | 66.54 | -1.136 | 66.21 | -0.633 |
| -0.54254 | 66.69 | -1.141 | 66.36 | -0.635 |
| -0.56761 | 66.85 | -1.142 | 66.52 | -0.637 |
| -0.58492 | 67.01 | -1.14  | 66.67 | -0.639 |
| -0.5788  | 67.16 | -1.138 | 66.83 | -0.641 |
| -0.56047 | 67.32 | -1.143 | 66.98 | -0.643 |
| -0.59539 | 67.47 | -1.15  | 67.14 | -0.645 |
| -0.65112 | 67.63 | -1.156 | 67.29 | -0.648 |
| -0.7064  | 67.79 | -1.155 | 67.45 | -0.65  |
| -0.71732 | 67.95 | -1.152 | 67.6  | -0.653 |
| -0.66355 | 68.1  | -1.148 | 67.76 | -0.656 |
| -0.64006 | 68.26 | -1.147 | 67.92 | -0.659 |
| -0.58978 | 68.42 | -1.15  | 68.07 | -0.662 |
| -0.57668 | 68.58 | -1.152 | 68.23 | -0.665 |
| -0.62073 | 68.73 | -1.151 | 68.39 | -0.668 |
| -0.68895 | 68.89 | -1.151 | 68.54 | -0.672 |
| -0.71173 | 69.05 | -1.155 | 68.7  | -0.675 |
| -0.65331 | 69.21 | -1.159 | 68.86 | -0.679 |
| -0.59012 | 69.37 | -1.158 | 69.01 | -0.682 |
| -0.57973 | 69.53 | -1.16  | 69.17 | -0.686 |
| -0.62439 | 69.68 | -1.163 | 69.33 | -0.69  |
| -0.68531 | 69.84 | -1.169 | 69.49 | -0.693 |
| -0.66066 | 70    | -1.173 | 69.65 | -0.697 |
| -0.66194 | 70.16 | -1.173 | 69.8  | -0.701 |
| -0.63802 | 70.32 | -1.175 | 69.96 | -0.704 |
| -0.68889 | 70.48 | -1.177 | 70.12 | -0.708 |
| -0.65315 | 70.64 | -1.182 | 70.28 | -0.712 |
| -0.63694 | 70.8  | -1.183 | 70.44 | -0.715 |
| -0.68393 | 70.96 | -1.184 | 70.6  | -0.718 |
| -0.76141 | 71.12 | -1.185 | 70.75 | -0.722 |
| -0.7518  | 71.28 | -1.187 | 70.91 | -0.725 |
| -0.68212 | 71.44 | -1.185 | 71.07 | -0.727 |
| -0.63475 | 71.6  | -1.184 | 71.23 | -0.73  |
| -0.64484 | 71.77 | -1.183 | 71.39 | -0.732 |
| -0.66093 | 71.93 | -1.183 | 71.55 | -0.734 |
| -0.64063 | 72.09 | -1.183 | 71.71 | -0.736 |
| -0.6577  | 72.25 | -1.182 | 71.87 | -0.738 |
| -0.69155 | 72.41 | -1.182 | 72.03 | -0.739 |
| -0.7087  | 72.57 | -1.181 | 72.19 | -0.741 |
| -0.71791 | 72.73 | -1.183 | 72.35 | -0.742 |
| -0.72318 | 72.89 | -1.184 | 72.51 | -0.743 |
| -0.72607 | 73.06 | -1.186 | 72.67 | -0.743 |
| -0.72771 | 73.22 | -1.186 | 72.83 | -0.744 |
| -0.72861 | 73.38 | -1.185 | 73    | -0.745 |
| -0.72846 | 73.54 | -1.183 | 73.16 | -0.746 |
| -0.73424 | 73.71 | -1.182 | 73.32 | -0.746 |

|          |       |        |       |        |
|----------|-------|--------|-------|--------|
| -0.71116 | 73.87 | -1.183 | 73.48 | -0.747 |
| -0.72859 | 74.03 | -1.185 | 73.64 | -0.747 |
| -0.75566 | 74.19 | -1.189 | 73.8  | -0.748 |
| -0.72708 | 74.36 | -1.19  | 73.96 | -0.748 |
| -0.72777 | 74.52 | -1.189 | 74.12 | -0.749 |
| -0.70826 | 74.68 | -1.185 | 74.29 | -0.749 |
| -0.80434 | 74.84 | -1.183 | 74.45 | -0.75  |
| -0.77852 | 75.01 | -1.183 | 74.61 | -0.75  |
| -0.77234 | 75.17 | -1.183 | 74.77 | -0.751 |
| -0.78385 | 75.33 | -1.182 | 74.93 | -0.751 |
| -0.87249 | 75.5  | -1.179 | 75.1  | -0.751 |
| -0.87096 | 75.66 | -1.179 | 75.26 | -0.752 |
| -0.76366 | 75.82 | -1.177 | 75.42 | -0.752 |
| -0.69114 | 75.99 | -1.175 | 75.58 | -0.752 |
| -0.69332 | 76.15 | -1.175 | 75.75 | -0.752 |
| -0.75721 | 76.32 | -1.178 | 75.91 | -0.753 |
| -0.77805 | 76.48 | -1.182 | 76.07 | -0.753 |
| -0.78803 | 76.64 | -1.183 | 76.23 | -0.754 |
| -0.77396 | 76.81 | -1.181 | 76.4  | -0.754 |
| -0.78906 | 76.97 | -1.182 | 76.56 | -0.754 |
| -0.76439 | 77.14 | -1.186 | 76.72 | -0.755 |
| -0.7575  | 77.3  | -1.189 | 76.89 | -0.755 |
| -0.75982 | 77.46 | -1.188 | 77.05 | -0.755 |
| -0.82889 | 77.63 | -1.19  | 77.21 | -0.756 |
| -0.89193 | 77.79 | -1.189 | 77.38 | -0.756 |
| -0.80126 | 77.96 | -1.187 | 77.54 | -0.756 |
| -0.71944 | 78.12 | -1.182 | 77.7  | -0.756 |
| -0.66404 | 78.29 | -1.176 | 77.87 | -0.756 |
| -0.77194 | 78.45 | -1.174 | 78.03 | -0.756 |
| -0.84546 | 78.62 | -1.172 | 78.19 | -0.756 |
| -0.91094 | 78.78 | -1.171 | 78.36 | -0.756 |
| -0.86841 | 78.95 | -1.17  | 78.52 | -0.756 |
| -0.83784 | 79.11 | -1.171 | 78.69 | -0.756 |
| -0.78607 | 79.28 | -1.172 | 78.85 | -0.756 |
| -0.78619 | 79.44 | -1.176 | 79.01 | -0.756 |
| -0.84651 | 79.61 | -1.178 | 79.18 | -0.756 |
| -0.89841 | 79.77 | -1.183 | 79.34 | -0.755 |
| -0.93644 | 79.94 | -1.186 | 79.51 | -0.755 |
| -0.85591 | 80.1  | -1.186 | 79.67 | -0.755 |
| -0.77609 | 80.27 | -1.186 | 79.83 | -0.755 |
| -0.75132 | 80.43 | -1.183 | 80    | -0.755 |
| -0.74931 | 80.6  | -1.18  | 80.16 | -0.755 |
| -0.84313 | 80.76 | -1.178 | 80.33 | -0.755 |
| -0.88472 | 80.93 | -1.179 | 80.49 | -0.755 |
| -0.92706 | 81.1  | -1.178 | 80.66 | -0.755 |
| -0.83106 | 81.26 | -1.175 | 80.82 | -0.755 |
| -0.83724 | 81.43 | -1.173 | 80.99 | -0.755 |
| -0.89259 | 81.59 | -1.173 | 81.15 | -0.756 |
| -0.94636 | 81.76 | -1.175 | 81.32 | -0.756 |
| -1.00069 | 81.92 | -1.174 | 81.48 | -0.757 |
| -0.96028 | 82.09 | -1.174 | 81.65 | -0.758 |
| -0.92923 | 82.26 | -1.172 | 81.81 | -0.758 |
| -0.83301 | 82.42 | -1.171 | 81.98 | -0.759 |
| -0.89147 | 82.59 | -1.168 | 82.14 | -0.76  |

|          |       |        |       |        |
|----------|-------|--------|-------|--------|
| -0.94197 | 82.76 | -1.167 | 82.31 | -0.761 |
| -0.99594 | 82.92 | -1.164 | 82.47 | -0.762 |
| -0.93557 | 83.09 | -1.163 | 82.64 | -0.762 |
| -0.9303  | 83.25 | -1.162 | 82.8  | -0.763 |
| -0.96826 | 83.42 | -1.164 | 82.97 | -0.764 |
| -0.96684 | 83.59 | -1.166 | 83.13 | -0.765 |
| -0.96718 | 83.75 | -1.168 | 83.3  | -0.765 |
| -0.89001 | 83.92 | -1.166 | 83.46 | -0.766 |
| -0.85805 | 84.09 | -1.161 | 83.63 | -0.766 |
| -0.90755 | 84.25 | -1.158 | 83.79 | -0.766 |
| -0.91537 | 84.42 | -1.156 | 83.96 | -0.767 |
| -1.00644 | 84.59 | -1.157 | 84.13 | -0.767 |
| -0.99006 | 84.75 | -1.157 | 84.29 | -0.767 |
| -0.94562 | 84.92 | -1.154 | 84.46 | -0.766 |
| -0.83992 | 85.09 | -1.152 | 84.62 | -0.766 |
| -0.83377 | 85.25 | -1.15  | 84.79 | -0.765 |
| -0.92883 | 85.42 | -1.147 | 84.95 | -0.764 |
| -1.01992 | 85.59 | -1.143 | 85.12 | -0.763 |
| -1.06411 | 85.75 | -1.136 | 85.29 | -0.762 |
| -1.05302 | 85.92 | -1.132 | 85.45 | -0.761 |
| -0.9734  | 86.09 | -1.13  | 85.62 | -0.76  |
| -0.83916 | 86.25 | -1.13  | 85.78 | -0.759 |
| -0.86638 | 86.42 | -1.13  | 85.95 | -0.758 |
| -0.96903 | 86.59 | -1.128 | 86.12 | -0.757 |
| -1.04775 | 86.75 | -1.127 | 86.28 | -0.756 |
| -1.0001  | 86.92 | -1.127 | 86.45 | -0.754 |
| -0.90481 | 87.09 | -1.127 | 86.61 | -0.753 |
| -0.85201 | 87.25 | -1.126 | 86.78 | -0.751 |
| -0.8957  | 87.42 | -1.12  | 86.95 | -0.75  |
| -0.99306 | 87.59 | -1.115 | 87.11 | -0.748 |
| -1.08495 | 87.76 | -1.111 | 87.28 | -0.746 |
| -1.06476 | 87.92 | -1.107 | 87.44 | -0.744 |
| -1.04725 | 88.09 | -1.101 | 87.61 | -0.742 |
| -1.02379 | 88.26 | -1.093 | 87.78 | -0.74  |
| -1.0209  | 88.42 | -1.09  | 87.94 | -0.738 |
| -1.03421 | 88.59 | -1.092 | 88.11 | -0.735 |
| -1.00213 | 88.76 | -1.093 | 88.28 | -0.733 |
| -0.99406 | 88.93 | -1.093 | 88.44 | -0.731 |
| -0.93694 | 89.09 | -1.092 | 88.61 | -0.728 |
| -0.91594 | 89.26 | -1.093 | 88.77 | -0.726 |
| -0.89202 | 89.43 | -1.093 | 88.94 | -0.723 |
| -0.9527  | 89.6  | -1.092 | 89.11 | -0.72  |
| -1.02407 | 89.76 | -1.089 | 89.27 | -0.718 |
| -1.1135  | 89.93 | -1.085 | 89.44 | -0.715 |
| -1.10155 | 90.1  | -1.083 | 89.61 | -0.712 |
| -1.00824 | 90.27 | -1.081 | 89.77 | -0.709 |
| -0.94573 | 90.43 | -1.08  | 89.94 | -0.706 |
| -1.00877 | 90.6  | -1.078 | 90.11 | -0.704 |
| -1.1724  | 90.77 | -1.076 | 90.27 | -0.701 |
| -1.24527 | 90.94 | -1.074 | 90.44 | -0.698 |
| -1.16918 | 91.1  | -1.071 | 90.61 | -0.696 |
| -1.04248 | 91.27 | -1.069 | 90.77 | -0.693 |
| -0.97273 | 91.44 | -1.066 | 90.94 | -0.691 |
| -1.07111 | 91.61 | -1.063 | 91.11 | -0.689 |

|          |        |        |        |        |
|----------|--------|--------|--------|--------|
| -1.11796 | 91.77  | -1.06  | 91.27  | -0.686 |
| -1.08531 | 91.94  | -1.056 | 91.44  | -0.684 |
| -1.02214 | 92.11  | -1.053 | 91.6   | -0.682 |
| -1.02852 | 92.28  | -1.051 | 91.77  | -0.68  |
| -1.00422 | 92.44  | -1.047 | 91.94  | -0.678 |
| -0.98438 | 92.61  | -1.042 | 92.1   | -0.676 |
| -1.01039 | 92.78  | -1.038 | 92.27  | -0.674 |
| -1.19174 | 92.95  | -1.037 | 92.44  | -0.672 |
| -1.23785 | 93.11  | -1.034 | 92.61  | -0.67  |
| -1.12479 | 93.28  | -1.029 | 92.77  | -0.668 |
| -0.94521 | 93.45  | -1.024 | 92.94  | -0.666 |
| -0.84953 | 93.62  | -1.022 | 93.11  | -0.665 |
| -0.96266 | 93.79  | -1.019 | 93.27  | -0.663 |
| -1.06168 | 93.95  | -1.016 | 93.44  | -0.661 |
| -1.10278 | 94.12  | -1.012 | 93.61  | -0.66  |
| -1.0648  | 94.29  | -1.009 | 93.77  | -0.658 |
| -1.07637 | 94.46  | -1.008 | 93.94  | -0.656 |
| -1.07042 | 94.62  | -1.006 | 94.11  | -0.654 |
| -1.07519 | 94.79  | -1.004 | 94.27  | -0.653 |
| -1.1486  | 94.96  | -1     | 94.44  | -0.651 |
| -1.23124 | 95.13  | -0.998 | 94.61  | -0.649 |
| -1.21269 | 95.3   | -0.995 | 94.77  | -0.648 |
| -1.10742 | 95.46  | -0.994 | 94.94  | -0.646 |
| -0.94832 | 95.63  | -0.993 | 95.11  | -0.645 |
| -0.94454 | 95.8   | -0.991 | 95.27  | -0.643 |
| -1.01081 | 95.97  | -0.988 | 95.44  | -0.642 |
| -1.14073 | 96.13  | -0.987 | 95.61  | -0.64  |
| -1.12258 | 96.3   | -0.984 | 95.78  | -0.638 |
| -1.07495 | 96.47  | -0.984 | 95.94  | -0.637 |
| -1.03658 | 96.64  | -0.983 | 96.11  | -0.635 |
| -1.1033  | 96.81  | -0.984 | 96.28  | -0.633 |
| -1.13452 | 96.97  | -0.982 | 96.44  | -0.632 |
| -1.15079 | 97.14  | -0.977 | 96.61  | -0.63  |
| -1.19213 | 97.31  | -0.972 | 96.78  | -0.628 |
| -1.17977 | 97.48  | -0.968 | 96.94  | -0.627 |
| -1.24593 | 97.65  | -0.962 | 97.11  | -0.625 |
| -1.19102 | 97.81  | -0.954 | 97.28  | -0.623 |
| -1.21151 | 97.98  | -0.947 | 97.45  | -0.621 |
| -1.15852 | 98.15  | -0.943 | 97.61  | -0.62  |
| -1.1759  | 98.32  | -0.942 | 97.78  | -0.618 |
| -1.14523 | 98.49  | -0.942 | 97.95  | -0.616 |
| -1.07756 | 98.65  | -0.94  | 98.11  | -0.615 |
| -1.02604 | 98.82  | -0.935 | 98.28  | -0.613 |
| -1.00121 | 98.99  | -0.931 | 98.45  | -0.612 |
| -1.02177 | 99.16  | -0.928 | 98.61  | -0.61  |
| -1.11976 | 99.33  | -0.927 | 98.78  | -0.608 |
| -1.20251 | 99.49  | -0.925 | 98.95  | -0.606 |
| -1.24696 | 99.66  | -0.922 | 99.12  | -0.605 |
| -1.18416 | 99.83  | -0.918 | 99.28  | -0.603 |
| -1.19542 | 100    | -0.916 | 99.45  | -0.601 |
| -1.28197 | 100.17 | -0.917 | 99.62  | -0.599 |
| -1.22192 | 100.33 | -0.916 | 99.78  | -0.597 |
| -1.17282 | 100.5  | -0.912 | 99.95  | -0.595 |
| -1.14635 | 100.67 | -0.909 | 100.12 | -0.593 |

|           |         |         |         |         |
|-----------|---------|---------|---------|---------|
| -1. 17601 | 100. 84 | -0. 906 | 100. 28 | -0. 591 |
| -1. 14348 | 101. 01 | -0. 906 | 100. 45 | -0. 589 |
| -1. 13362 | 101. 17 | -0. 908 | 100. 62 | -0. 587 |
| -1. 10855 | 101. 34 | -0. 908 | 100. 79 | -0. 585 |
| -1. 21468 | 101. 51 | -0. 906 | 100. 95 | -0. 583 |
| -1. 1954  | 101. 68 | -0. 905 | 101. 12 | -0. 58  |
| -1. 2821  | 101. 85 | -0. 906 | 101. 29 | -0. 578 |
| -1. 23024 | 102. 01 | -0. 905 | 101. 45 | -0. 576 |
| -1. 11712 | 102. 18 | -0. 9   | 101. 62 | -0. 573 |
| -1. 12062 | 102. 35 | -0. 897 | 101. 79 | -0. 57  |
| -1. 11461 | 102. 52 | -0. 898 | 101. 95 | -0. 567 |
| -1. 23087 | 102. 69 | -0. 899 | 102. 12 | -0. 565 |
| -1. 24264 | 102. 85 | -0. 897 | 102. 29 | -0. 562 |
| -1. 22878 | 103. 02 | -0. 893 | 102. 46 | -0. 559 |
| -1. 23101 | 103. 19 | -0. 89  | 102. 62 | -0. 556 |
| -1. 16499 | 103. 36 | -0. 887 | 102. 79 | -0. 554 |
| -1. 15655 | 103. 53 | -0. 887 | 102. 96 | -0. 551 |
| -1. 15327 | 103. 69 | -0. 886 | 103. 12 | -0. 548 |
| -1. 25807 | 103. 86 | -0. 883 | 103. 29 | -0. 545 |
| -1. 23989 | 104. 03 | -0. 876 | 103. 46 | -0. 542 |
| -1. 22438 | 104. 2  | -0. 871 | 103. 63 | -0. 539 |
| -1. 22427 | 104. 37 | -0. 868 | 103. 79 | -0. 537 |
| -1. 23873 | 104. 53 | -0. 866 | 103. 96 | -0. 534 |
| -1. 3159  | 104. 7  | -0. 861 | 104. 13 | -0. 531 |
| -1. 25893 | 104. 87 | -0. 856 | 104. 29 | -0. 529 |
| -1. 2099  | 105. 04 | -0. 851 | 104. 46 | -0. 526 |
| -1. 10643 | 105. 21 | -0. 849 | 104. 63 | -0. 524 |
| -1. 16184 | 105. 37 | -0. 847 | 104. 8  | -0. 521 |
| -1. 27165 | 105. 54 | -0. 845 | 104. 96 | -0. 519 |
| -1. 33521 | 105. 71 | -0. 845 | 105. 13 | -0. 516 |
| -1. 32809 | 105. 88 | -0. 846 | 105. 3  | -0. 513 |
| -1. 28365 | 106. 05 | -0. 849 | 105. 46 | -0. 511 |
| -1. 25974 | 106. 21 | -0. 851 | 105. 63 | -0. 508 |
| -1. 16778 | 106. 38 | -0. 85  | 105. 8  | -0. 506 |
| -1. 20432 | 106. 55 | -0. 85  | 105. 96 | -0. 503 |
| -1. 27152 | 106. 72 | -0. 85  | 106. 13 | -0. 5   |
| -1. 35429 | 106. 88 | -0. 849 | 106. 3  | -0. 497 |
| -1. 2652  | 107. 05 | -0. 848 | 106. 47 | -0. 495 |
| -1. 20257 | 107. 22 | -0. 844 | 106. 63 | -0. 492 |
| -1. 13309 | 107. 39 | -0. 842 | 106. 8  | -0. 489 |
| -1. 14448 | 107. 56 | -0. 839 | 106. 97 | -0. 487 |
| -1. 18959 | 107. 72 | -0. 835 | 107. 13 | -0. 484 |
| -1. 2533  | 107. 89 | -0. 829 | 107. 3  | -0. 482 |
| -1. 34206 | 108. 06 | -0. 827 | 107. 47 | -0. 48  |
| -1. 28068 | 108. 23 | -0. 828 | 107. 63 | -0. 477 |
| -1. 24966 | 108. 4  | -0. 828 | 107. 8  | -0. 475 |
| -1. 2282  | 108. 56 | -0. 826 | 107. 97 | -0. 473 |
| -1. 28073 | 108. 73 | -0. 82  | 108. 14 | -0. 471 |
| -1. 3231  | 108. 9  | -0. 815 | 108. 3  | -0. 468 |
| -1. 27341 | 109. 07 | -0. 81  | 108. 47 | -0. 466 |
| -1. 22087 | 109. 23 | -0. 808 | 108. 64 | -0. 464 |
| -1. 13076 | 109. 4  | -0. 805 | 108. 8  | -0. 462 |
| -1. 10157 | 109. 57 | -0. 804 | 108. 97 | -0. 46  |
| -1. 1802  | 109. 74 | -0. 802 | 109. 14 | -0. 458 |

|          |        |        |        |        |
|----------|--------|--------|--------|--------|
| -1.31051 | 109.91 | -0.801 | 109.3  | -0.456 |
| -1.43124 | 110.07 | -0.802 | 109.47 | -0.454 |
| -1.39918 | 110.24 | -0.802 | 109.64 | -0.452 |
| -1.33963 | 110.41 | -0.798 | 109.81 | -0.45  |
| -1.27951 | 110.58 | -0.794 | 109.97 | -0.449 |
| -1.23368 | 110.75 | -0.793 | 110.14 | -0.447 |
| -1.22576 | 110.91 | -0.793 | 110.31 | -0.445 |
| -1.30988 | 111.08 | -0.791 | 110.47 | -0.443 |
| -1.31451 | 111.25 | -0.788 | 110.64 | -0.441 |
| -1.23042 | 111.42 | -0.787 | 110.81 | -0.439 |
| -1.16677 | 111.58 | -0.789 | 110.97 | -0.437 |
| -1.26857 | 111.75 | -0.787 | 111.14 | -0.436 |
| -1.30241 | 111.92 | -0.782 | 111.31 | -0.434 |
| -1.32224 | 112.09 | -0.775 | 111.47 | -0.432 |
| -1.327   | 112.26 | -0.772 | 111.64 | -0.429 |
| -1.40689 | 112.42 | -0.77  | 111.81 | -0.427 |
| -1.33492 | 112.59 | -0.769 | 111.98 | -0.425 |
| -1.36204 | 112.76 | -0.766 | 112.14 | -0.423 |
| -1.38492 | 112.93 | -0.763 | 112.31 | -0.421 |
| -1.40321 | 113.09 | -0.76  | 112.48 | -0.419 |
| -1.33084 | 113.26 | -0.762 | 112.64 | -0.416 |
| -1.28586 | 113.43 | -0.764 | 112.81 | -0.414 |
| -1.29688 | 113.6  | -0.764 | 112.98 | -0.412 |
| -1.28081 | 113.77 | -0.763 | 113.14 | -0.409 |
| -1.26818 | 113.93 | -0.761 | 113.31 | -0.407 |
| -1.33277 | 114.1  | -0.757 | 113.48 | -0.405 |
| -1.3896  | 114.27 | -0.751 | 113.64 | -0.402 |
| -1.36977 | 114.44 | -0.743 | 113.81 | -0.4   |
| -1.33736 | 114.6  | -0.738 | 113.98 | -0.398 |
| -1.22939 | 114.77 | -0.735 | 114.14 | -0.395 |
| -1.30978 | 114.94 | -0.733 | 114.31 | -0.393 |
| -1.34573 | 115.11 | -0.73  | 114.48 | -0.391 |
| -1.35805 | 115.28 | -0.726 | 114.64 | -0.389 |
| -1.31264 | 115.44 | -0.723 | 114.81 | -0.386 |
| -1.30536 | 115.61 | -0.723 | 114.98 | -0.384 |
| -1.40595 | 115.78 | -0.724 | 115.15 | -0.382 |
| -1.39674 | 115.95 | -0.724 | 115.31 | -0.379 |
| -1.3112  | 116.11 | -0.723 | 115.48 | -0.377 |
| -1.21197 | 116.28 | -0.723 | 115.65 | -0.375 |
| -1.3621  | 116.45 | -0.723 | 115.81 | -0.372 |
| -1.42602 | 116.62 | -0.72  | 115.98 | -0.37  |
| -1.44959 | 116.78 | -0.714 | 116.15 | -0.368 |
| -1.2538  | 116.95 | -0.71  | 116.31 | -0.366 |
| -1.28337 | 117.12 | -0.71  | 116.48 | -0.364 |
| -1.36258 | 117.29 | -0.712 | 116.65 | -0.363 |
| -1.39993 | 117.45 | -0.713 | 116.81 | -0.361 |
| -1.36618 | 117.62 | -0.712 | 116.98 | -0.359 |
| -1.30322 | 117.79 | -0.709 | 117.15 | -0.358 |
| -1.32069 | 117.96 | -0.706 | 117.31 | -0.356 |
| -1.36069 | 118.13 | -0.704 | 117.48 | -0.355 |
| -1.35261 | 118.29 | -0.702 | 117.65 | -0.353 |
| -1.38885 | 118.46 | -0.699 | 117.81 | -0.351 |
| -1.38155 | 118.63 | -0.695 | 117.98 | -0.35  |
| -1.3744  | 118.8  | -0.691 | 118.15 | -0.348 |

|          |        |        |        |        |
|----------|--------|--------|--------|--------|
| -1.33999 | 118.96 | -0.692 | 118.31 | -0.346 |
| -1.39006 | 119.13 | -0.693 | 118.48 | -0.344 |
| -1.40481 | 119.3  | -0.691 | 118.65 | -0.342 |
| -1.45558 | 119.47 | -0.684 | 118.81 | -0.34  |
| -1.35093 | 119.63 | -0.681 | 118.98 | -0.338 |
| -1.2758  | 119.8  | -0.683 | 119.15 | -0.336 |
| -1.28065 | 119.97 | -0.683 | 119.31 | -0.334 |
| -1.30275 | 120.13 | -0.681 | 119.48 | -0.332 |
| -1.3768  | 120.3  | -0.679 | 119.65 | -0.33  |
| -1.33334 | 120.47 | -0.678 | 119.81 | -0.327 |
| -1.29899 | 120.64 | -0.678 | 119.98 | -0.325 |
| -1.2612  | 120.8  | -0.677 | 120.15 | -0.323 |
| -1.27729 | 120.97 | -0.678 | 120.31 | -0.321 |
| -1.32271 | 121.14 | -0.677 | 120.48 | -0.319 |
| -1.38277 | 121.31 | -0.676 | 120.65 | -0.317 |
| -1.42278 | 121.47 | -0.674 | 120.81 | -0.314 |
| -1.35887 | 121.64 | -0.671 | 120.98 | -0.312 |
| -1.36935 | 121.81 | -0.668 | 121.15 | -0.31  |
| -1.29497 | 121.98 | -0.666 | 121.31 | -0.308 |
| -1.39564 | 122.14 | -0.663 | 121.48 | -0.305 |
| -1.46691 | 122.31 | -0.66  | 121.65 | -0.303 |
| -1.56598 | 122.48 | -0.658 | 121.81 | -0.301 |
| -1.54133 | 122.65 | -0.656 | 121.98 | -0.299 |
| -1.40031 | 122.81 | -0.655 | 122.15 | -0.298 |
| -1.3705  | 122.98 | -0.653 | 122.31 | -0.296 |
| -1.39504 | 123.15 | -0.65  | 122.48 | -0.294 |
| -1.34954 | 123.31 | -0.647 | 122.65 | -0.293 |
| -1.40373 | 123.48 | -0.647 | 122.81 | -0.292 |
| -1.37694 | 123.65 | -0.647 | 122.98 | -0.29  |
| -1.44611 | 123.82 | -0.646 | 123.15 | -0.289 |
| -1.29968 | 123.98 | -0.642 | 123.31 | -0.289 |
| -1.29484 | 124.15 | -0.64  | 123.48 | -0.288 |
| -1.35116 | 124.32 | -0.638 | 123.65 | -0.287 |
| -1.43477 | 124.49 | -0.637 | 123.81 | -0.286 |
| -1.49327 | 124.65 | -0.635 | 123.98 | -0.286 |
| -1.53927 | 124.82 | -0.635 | 124.14 | -0.285 |
| -1.48089 | 124.99 | -0.635 | 124.31 | -0.284 |
| -1.4469  | 125.16 | -0.636 | 124.48 | -0.284 |
| -1.36408 | 125.32 | -0.635 | 124.64 | -0.284 |
| -1.487   | 125.49 | -0.633 | 124.81 | -0.283 |
| -1.34907 | 125.66 | -0.629 | 124.98 | -0.283 |
| -1.32451 | 125.82 | -0.624 | 125.14 | -0.283 |
| -1.29234 | 125.99 | -0.622 | 125.31 | -0.283 |
| -1.27369 | 126.16 | -0.621 | 125.48 | -0.283 |
| -1.37897 | 126.33 | -0.621 | 125.64 | -0.284 |
| -1.39364 | 126.49 | -0.619 | 125.81 | -0.284 |
| -1.52975 | 126.66 | -0.616 | 125.97 | -0.285 |
| -1.42921 | 126.83 | -0.613 | 126.14 | -0.285 |
| -1.35804 | 126.99 | -0.61  | 126.31 | -0.286 |
| -1.29152 | 127.16 | -0.607 | 126.47 | -0.286 |
| -1.39302 | 127.33 | -0.603 | 126.64 | -0.287 |
| -1.4166  | 127.5  | -0.599 | 126.81 | -0.287 |
| -1.44294 | 127.66 | -0.596 | 126.97 | -0.288 |
| -1.45392 | 127.83 | -0.595 | 127.14 | -0.288 |



|          |        |        |        |        |
|----------|--------|--------|--------|--------|
| -1.4647  | 128    | -0.594 | 127.3  | -0.288 |
| -1.48498 | 128.16 | -0.591 | 127.47 | -0.288 |
| -1.47892 | 128.33 | -0.585 | 127.64 | -0.288 |
| -1.38291 | 128.5  | -0.58  | 127.8  | -0.288 |
| -1.40164 | 128.66 | -0.578 | 127.97 | -0.287 |
| -1.37988 | 128.83 | -0.579 | 128.14 | -0.287 |
| -1.41642 | 129    | -0.581 | 128.3  | -0.286 |
| -1.40711 | 129.17 | -0.581 | 128.47 | -0.286 |
| -1.36446 | 129.33 | -0.579 | 128.64 | -0.285 |
| -1.33582 | 129.5  | -0.574 | 128.8  | -0.284 |
| -1.51229 | 129.67 | -0.569 | 128.97 | -0.283 |
| -1.49542 | 129.83 | -0.567 | 129.13 | -0.282 |
| -1.53962 | 130    | -0.567 | 129.3  | -0.28  |
| -1.36463 | 130.17 | -0.566 | 129.47 | -0.279 |
| -1.35771 | 130.33 | -0.564 | 129.63 | -0.278 |
| -1.42317 | 130.5  | -0.56  | 129.8  | -0.276 |
| -1.42326 | 130.67 | -0.558 | 129.97 | -0.275 |
| -1.42012 | 130.83 | -0.557 | 130.13 | -0.273 |
| -1.37738 | 131    | -0.556 | 130.3  | -0.272 |
| -1.36024 | 131.17 | -0.555 | 130.46 | -0.27  |
| -1.37879 | 131.33 | -0.553 | 130.63 | -0.269 |
| -1.43148 | 131.5  | -0.552 | 130.8  | -0.268 |
| -1.51373 | 131.67 | -0.549 | 130.96 | -0.268 |
| -1.52977 | 131.84 | -0.545 | 131.13 | -0.267 |
| -1.37329 | 132    | -0.539 | 131.29 | -0.266 |
| -1.33326 | 132.17 | -0.534 | 131.46 | -0.266 |
| -1.28102 | 132.34 | -0.53  | 131.63 | -0.265 |
| -1.37402 | 132.5  | -0.53  | 131.79 | -0.265 |
| -1.38781 | 132.67 | -0.531 | 131.96 | -0.265 |
| -1.42111 | 132.84 | -0.531 | 132.12 | -0.264 |
| -1.40764 | 133    | -0.53  | 132.29 | -0.264 |
| -1.30679 | 133.17 | -0.528 | 132.46 | -0.264 |
| -1.25871 | 133.34 | -0.526 | 132.62 | -0.264 |
| -1.33308 | 133.5  | -0.524 | 132.79 | -0.264 |
| -1.43786 | 133.67 | -0.521 | 132.96 | -0.263 |
| -1.42824 | 133.84 | -0.518 | 133.12 | -0.263 |
| -1.39155 | 134    | -0.517 | 133.29 | -0.263 |
| -1.37996 | 134.17 | -0.516 | 133.45 | -0.263 |
| -1.42504 | 134.34 | -0.516 | 133.62 | -0.263 |
| -1.47253 | 134.5  | -0.515 | 133.79 | -0.263 |
| -1.42637 | 134.67 | -0.515 | 133.95 | -0.263 |
| -1.46146 | 134.84 | -0.514 | 134.12 | -0.263 |
| -1.42409 | 135    | -0.512 | 134.28 | -0.263 |
| -1.47704 | 135.17 | -0.51  | 134.45 | -0.264 |
| -1.375   | 135.34 | -0.509 | 134.62 | -0.264 |
| -1.3214  | 135.5  | -0.509 | 134.78 | -0.264 |
| -1.37751 | 135.66 | -0.508 | 134.95 | -0.264 |
| -1.44667 | 135.82 | -0.507 | 135.11 | -0.264 |
| -1.48168 | 135.98 | -0.506 | 135.28 | -0.264 |
| -1.38244 | 136.14 | -0.506 | 135.45 | -0.264 |
| -1.33741 | 136.3  | -0.506 | 135.61 | -0.263 |
| -1.37125 | 136.46 | -0.507 | 135.77 | -0.263 |
| -1.41678 | 136.63 | -0.507 | 135.93 | -0.263 |
| -1.48905 | 136.79 | -0.507 | 136.08 | -0.263 |

|          |        |        |        |        |
|----------|--------|--------|--------|--------|
| -1.42404 | 136.96 | -0.505 | 136.24 | -0.262 |
| -1.38635 | 137.14 | -0.501 | 136.4  | -0.262 |
| -1.30909 | 137.31 | -0.496 | 136.56 | -0.261 |
| -1.31363 | 137.48 | -0.492 | 136.73 | -0.26  |
| -1.36675 | 137.65 | -0.491 | 136.9  | -0.259 |
| -1.39089 | 137.82 | -0.49  | 137.07 | -0.259 |
| -1.48595 | 137.99 | -0.492 | 137.24 | -0.258 |
| -1.43682 | 138.16 | -0.493 | 137.41 | -0.257 |
| -1.42776 | 138.33 | -0.493 | 137.58 | -0.256 |
| -1.27348 | 138.49 | -0.491 | 137.75 | -0.255 |
| -1.24977 | 138.66 | -0.489 | 137.92 | -0.254 |
| -1.318   | 138.83 | -0.487 | 138.09 | -0.253 |
| -1.37932 | 139    | -0.486 | 138.26 | -0.252 |
| -1.28515 | 139.16 | -0.485 | 138.42 | -0.25  |
| -1.24739 | 139.33 | -0.484 | 138.59 | -0.249 |
| -1.23195 | 139.5  | -0.482 | 138.76 | -0.248 |
| -1.33111 | 139.67 | -0.48  | 138.92 | -0.247 |
| -1.43675 | 139.83 | -0.48  | 139.09 | -0.246 |
| -1.43559 | 140    | -0.481 | 139.26 | -0.245 |
| -1.44023 | 140.17 | -0.484 | 139.42 | -0.244 |
| -1.26047 | 140.34 | -0.487 | 139.59 | -0.243 |
| -1.24137 | 140.51 | -0.488 | 139.76 | -0.242 |
| -1.24207 | 140.67 | -0.49  | 139.93 | -0.241 |
| -1.38965 | 140.84 | -0.489 | 140.09 | -0.24  |
| -1.39575 | 141.01 | -0.487 | 140.26 | -0.239 |
| -1.4454  | 141.18 | -0.481 | 140.43 | -0.238 |
| -1.38556 | 141.35 | -0.476 | 140.6  | -0.237 |
| -1.43527 | 141.52 | -0.472 | 140.76 | -0.235 |
| -1.40505 | 141.68 | -0.468 | 140.93 | -0.234 |
| -1.3572  | 141.85 | -0.465 | 141.1  | -0.233 |
| -1.36215 | 142.02 | -0.465 | 141.27 | -0.232 |
| -1.2869  | 142.19 | -0.465 | 141.43 | -0.23  |
| -1.32624 | 142.36 | -0.467 | 141.6  | -0.229 |
| -1.29319 | 142.53 | -0.467 | 141.77 | -0.228 |
| -1.25862 | 142.7  | -0.467 | 141.94 | -0.226 |
| -1.29684 | 142.87 | -0.467 | 142.11 | -0.225 |
| -1.34501 | 143.04 | -0.465 | 142.27 | -0.224 |
| -1.42863 | 143.2  | -0.462 | 142.44 | -0.223 |
| -1.32794 | 143.37 | -0.461 | 142.61 | -0.222 |
| -1.29202 | 143.54 | -0.461 | 142.78 | -0.221 |
| -1.2428  | 143.71 | -0.462 | 142.95 | -0.22  |
| -1.33955 | 143.88 | -0.46  | 143.12 | -0.219 |
| -1.34409 | 144.05 | -0.457 | 143.28 | -0.218 |
| -1.42305 | 144.22 | -0.454 | 143.45 | -0.218 |
| -1.36943 | 144.39 | -0.45  | 143.62 | -0.217 |
| -1.30915 | 144.56 | -0.448 | 143.79 | -0.216 |
| -1.28671 | 144.73 | -0.445 | 143.96 | -0.216 |
| -1.28575 | 144.9  | -0.444 | 144.13 | -0.215 |
| -1.36499 | 145.07 | -0.443 | 144.3  | -0.215 |
| -1.32559 | 145.24 | -0.442 | 144.46 | -0.215 |
| -1.37369 | 145.4  | -0.439 | 144.63 | -0.214 |
| -1.28355 | 145.57 | -0.439 | 144.8  | -0.214 |
| -1.26253 | 145.74 | -0.439 | 144.97 | -0.213 |
| -1.24561 | 145.91 | -0.438 | 145.14 | -0.213 |

|           |         |         |         |         |
|-----------|---------|---------|---------|---------|
| -1. 27153 | 146. 08 | -0. 435 | 145. 31 | -0. 213 |
| -1. 30981 | 146. 25 | -0. 43  | 145. 48 | -0. 212 |
| -1. 28716 | 146. 42 | -0. 428 | 145. 65 | -0. 212 |
| -1. 28299 | 146. 59 | -0. 426 | 145. 81 | -0. 211 |
| -1. 23815 | 146. 76 | -0. 427 | 145. 98 | -0. 211 |
| -1. 24062 | 146. 93 | -0. 427 | 146. 15 | -0. 21  |
| -1. 31773 | 147. 1  | -0. 425 | 146. 32 | -0. 209 |
| -1. 38871 | 147. 27 | -0. 424 | 146. 49 | -0. 209 |
| -1. 40307 | 147. 44 | -0. 423 | 146. 66 | -0. 208 |
| -1. 36673 | 147. 61 | -0. 421 | 146. 83 | -0. 207 |
| -1. 29367 | 147. 78 | -0. 417 | 147     | -0. 206 |
| -1. 24558 | 147. 95 | -0. 414 | 147. 17 | -0. 205 |
| -1. 15402 | 148. 12 | -0. 412 | 147. 34 | -0. 204 |
| -1. 21897 | 148. 29 | -0. 412 | 147. 5  | -0. 202 |
| -1. 26804 | 148. 45 | -0. 412 | 147. 67 | -0. 201 |
| -1. 34293 | 148. 62 | -0. 41  | 147. 84 | -0. 2   |
| -1. 20883 | 148. 79 | -0. 406 | 148. 01 | -0. 198 |
| -1. 21125 | 148. 96 | -0. 402 | 148. 18 | -0. 197 |
| -1. 28576 | 149. 13 | -0. 4   | 148. 35 | -0. 196 |
| -1. 47098 | 149. 3  | -0. 398 | 148. 52 | -0. 194 |
| -1. 39919 | 149. 47 | -0. 398 | 148. 69 | -0. 193 |
| -1. 33365 | 149. 64 | -0. 398 | 148. 86 | -0. 191 |
| -1. 2488  | 149. 81 | -0. 398 | 149. 03 | -0. 19  |
| -1. 26914 | 149. 98 | -0. 399 | 149. 2  | -0. 189 |
| -1. 30699 | 150. 15 | -0. 4   | 149. 36 | -0. 187 |
| -1. 30602 | 150. 32 | -0. 401 | 149. 53 | -0. 186 |
| -1. 27492 | 150. 49 | -0. 4   | 149. 7  | -0. 185 |
| -1. 25457 | 150. 66 | -0. 398 | 149. 87 | -0. 184 |
| -1. 16567 | 150. 83 | -0. 394 | 150. 04 | -0. 182 |
| -1. 15509 | 151     | -0. 391 | 150. 21 | -0. 181 |
| -1. 06786 | 151. 17 | -0. 387 | 150. 38 | -0. 18  |
| -1. 31699 | 151. 34 | -0. 384 | 150. 55 | -0. 179 |
| -1. 37457 | 151. 51 | -0. 381 | 150. 72 | -0. 178 |
| -1. 42729 | 151. 68 | -0. 38  | 150. 89 | -0. 177 |
| -1. 1873  | 151. 85 | -0. 38  | 151. 06 | -0. 177 |
| -1. 15118 | 152. 02 | -0. 379 | 151. 22 | -0. 176 |
| -1. 12116 | 152. 19 | -0. 378 | 151. 39 | -0. 175 |
| -1. 2635  | 152. 36 | -0. 375 | 151. 56 | -0. 174 |
| -1. 3145  | 152. 53 | -0. 372 | 151. 73 | -0. 173 |
| -1. 319   | 152. 69 | -0. 37  | 151. 9  | -0. 173 |
| -1. 22229 | 152. 86 | -0. 369 | 152. 07 | -0. 172 |
| -1. 18992 | 153. 03 | -0. 369 | 152. 24 | -0. 171 |
| -1. 14818 | 153. 2  | -0. 368 | 152. 41 | -0. 17  |
| -1. 22027 | 153. 37 | -0. 366 | 152. 58 | -0. 17  |
| -1. 18985 | 153. 54 | -0. 364 | 152. 75 | -0. 169 |
| -1. 2423  | 153. 71 | -0. 361 | 152. 92 | -0. 168 |
| -1. 18633 | 153. 88 | -0. 358 | 153. 08 | -0. 168 |
| -1. 29278 | 154. 05 | -0. 355 | 153. 25 | -0. 167 |
| -1. 29225 | 154. 22 | -0. 353 | 153. 42 | -0. 166 |
| -1. 30481 | 154. 39 | -0. 35  | 153. 59 | -0. 165 |
| -1. 20572 | 154. 56 | -0. 349 | 153. 76 | -0. 164 |
| -1. 22755 | 154. 73 | -0. 35  | 153. 93 | -0. 164 |
| -1. 13747 | 154. 9  | -0. 351 | 154. 1  | -0. 163 |
| -1. 08235 | 155. 07 | -0. 352 | 154. 27 | -0. 162 |

|          |        |        |        |        |
|----------|--------|--------|--------|--------|
| -1.09478 | 155.24 | -0.35  | 154.44 | -0.161 |
| -1.14528 | 155.41 | -0.347 | 154.61 | -0.16  |
| -1.26501 | 155.58 | -0.343 | 154.78 | -0.159 |
| -1.29309 | 155.75 | -0.342 | 154.94 | -0.158 |
| -1.26957 | 155.92 | -0.34  | 155.11 | -0.157 |
| -1.16699 | 156.09 | -0.339 | 155.28 | -0.157 |
| -1.02734 | 156.26 | -0.339 | 155.45 | -0.156 |
| -1.07807 | 156.43 | -0.339 | 155.62 | -0.155 |
| -1.1797  | 156.6  | -0.339 | 155.79 | -0.154 |
| -1.24931 | 156.77 | -0.337 | 155.96 | -0.153 |
| -1.13894 | 156.94 | -0.334 | 156.13 | -0.152 |
| -1.08965 | 157.11 | -0.331 | 156.3  | -0.151 |
| -1.07862 | 157.28 | -0.329 | 156.47 | -0.15  |
| -1.1601  | 157.45 | -0.328 | 156.64 | -0.15  |
| -1.11381 | 157.62 | -0.327 | 156.81 | -0.149 |
| -1.13644 | 157.79 | -0.326 | 156.98 | -0.148 |
| -1.15692 | 157.96 | -0.323 | 157.14 | -0.147 |
| -1.22625 | 158.12 | -0.321 | 157.31 | -0.147 |
| -1.20109 | 158.29 | -0.317 | 157.48 | -0.146 |
| -1.21224 | 158.46 | -0.313 | 157.65 | -0.146 |
| -1.1159  | 158.63 | -0.309 | 157.82 | -0.145 |
| -1.16786 | 158.8  | -0.305 | 157.99 | -0.144 |
| -1.12415 | 158.97 | -0.301 | 158.16 | -0.144 |
| -1.21602 | 159.14 | -0.299 | 158.33 | -0.143 |
| -1.13079 | 159.31 | -0.299 | 158.5  | -0.142 |
| -1.16363 | 159.48 | -0.299 | 158.67 | -0.141 |
| -1.14618 | 159.65 | -0.3   | 158.83 | -0.14  |
| -1.21096 | 159.82 | -0.301 | 159    | -0.14  |
| -1.13584 | 159.99 | -0.301 | 159.17 | -0.139 |
| -1.12449 | 160.16 | -0.302 | 159.34 | -0.137 |
| -1.09492 | 160.33 | -0.301 | 159.51 | -0.136 |
| -1.1282  | 160.5  | -0.299 | 159.68 | -0.135 |
| -1.09311 | 160.67 | -0.298 | 159.85 | -0.134 |
| -1.12824 | 160.84 | -0.296 | 160.02 | -0.133 |
| -1.15877 | 161.01 | -0.295 | 160.19 | -0.131 |
| -1.14039 | 161.18 | -0.295 | 160.36 | -0.13  |
| -1.06752 | 161.35 | -0.296 | 160.53 | -0.129 |
| -1.13485 | 161.52 | -0.296 | 160.7  | -0.127 |
| -1.15929 | 161.69 | -0.296 | 160.86 | -0.126 |
| -1.16238 | 161.86 | -0.296 | 161.03 | -0.125 |
| -1.06705 | 162.03 | -0.296 | 161.2  | -0.124 |
| -1.06054 | 162.2  | -0.295 | 161.37 | -0.122 |
| -1.09723 | 162.37 | -0.295 | 161.54 | -0.121 |
| -1.17425 | 162.54 | -0.294 | 161.71 | -0.12  |
| -1.19301 | 162.71 | -0.293 | 161.88 | -0.119 |
| -1.11697 | 162.88 | -0.293 | 162.05 | -0.118 |
| -1.07964 | 163.05 | -0.292 | 162.22 | -0.118 |
| -1.09909 | 163.21 | -0.291 | 162.39 | -0.117 |
| -1.12338 | 163.38 | -0.29  | 162.56 | -0.116 |
| -1.09895 | 163.55 | -0.288 | 162.73 | -0.116 |
| -1.00472 | 163.72 | -0.287 | 162.89 | -0.115 |
| -1.047   | 163.89 | -0.287 | 163.06 | -0.115 |
| -0.95733 | 164.06 | -0.287 | 163.23 | -0.115 |
| -1.05268 | 164.23 | -0.288 | 163.4  | -0.114 |

|          |        |        |        |        |
|----------|--------|--------|--------|--------|
| -1.07073 | 164.4  | -0.288 | 163.57 | -0.114 |
| -1.22443 | 164.57 | -0.288 | 163.74 | -0.114 |
| -1.14003 | 164.74 | -0.288 | 163.91 | -0.114 |
| -1.10447 | 164.91 | -0.287 | 164.08 | -0.114 |
| -1.00982 | 165.08 | -0.287 | 164.25 | -0.113 |
| -1.01628 | 165.25 | -0.287 | 164.42 | -0.113 |
| -1.03978 | 165.42 | -0.288 | 164.59 | -0.113 |
| -1.07131 | 165.59 | -0.289 | 164.76 | -0.113 |
| -1.10123 | 165.76 | -0.29  | 164.92 | -0.113 |
| -1.11816 | 165.93 | -0.29  | 165.09 | -0.113 |
| -1.03697 | 166.1  | -0.289 | 165.26 | -0.113 |
| -0.99626 | 166.27 | -0.288 | 165.43 | -0.113 |
| -0.96989 | 166.44 | -0.286 | 165.6  | -0.113 |
| -1.07953 | 166.61 | -0.286 | 165.77 | -0.113 |
| -1.14197 | 166.78 | -0.285 | 165.94 | -0.112 |
| -1.10341 | 166.95 | -0.285 | 166.11 | -0.112 |
| -1.02094 | 167.12 | -0.285 | 166.28 | -0.112 |
| -0.99342 | 167.29 | -0.285 | 166.45 | -0.112 |
| -1.02648 | 167.46 | -0.285 | 166.62 | -0.112 |
| -1.1082  | 167.63 | -0.285 | 166.78 | -0.112 |
| -1.05984 | 167.79 | -0.285 | 166.95 | -0.112 |
| -0.99419 | 167.96 | -0.284 | 167.12 | -0.112 |
| -0.88814 | 168.13 | -0.282 | 167.29 | -0.112 |
| -0.98747 | 168.3  | -0.281 | 167.46 | -0.112 |
| -1.03058 | 168.47 | -0.28  | 167.63 | -0.112 |
| -1.06437 | 168.64 | -0.279 | 167.8  | -0.112 |
| -1.03597 | 168.81 | -0.279 | 167.97 | -0.112 |
| -0.96175 | 168.98 | -0.279 | 168.14 | -0.112 |
| -1.02548 | 169.15 | -0.278 | 168.31 | -0.112 |
| -1.01542 | 169.32 | -0.278 | 168.48 | -0.112 |
| -1.0988  | 169.49 | -0.279 | 168.64 | -0.111 |
| -1.0365  | 169.66 | -0.279 | 168.81 | -0.111 |
| -0.92794 | 169.83 | -0.28  | 168.98 | -0.111 |
| -0.89775 | 170    | -0.28  | 169.15 | -0.111 |
| -0.94828 | 170.17 | -0.281 | 169.32 | -0.111 |
| -1.01206 | 170.34 | -0.281 | 169.49 | -0.111 |
| -0.93806 | 170.51 | -0.281 | 169.66 | -0.111 |
| -0.88195 | 170.68 | -0.281 | 169.83 | -0.111 |
| -0.84962 | 170.85 | -0.28  | 170    | -0.111 |
| -0.94936 | 171.02 | -0.279 | 170.17 | -0.11  |
| -0.95389 | 171.19 | -0.279 | 170.34 | -0.11  |
| -0.99962 | 171.36 | -0.279 | 170.5  | -0.11  |
| -1.0037  | 171.53 | -0.281 | 170.67 | -0.11  |
| -0.95196 | 171.7  | -0.282 | 170.84 | -0.11  |
| -0.8615  | 171.87 | -0.283 | 171.01 | -0.11  |
| -0.84068 | 172.04 | -0.283 | 171.18 | -0.11  |
| -0.89439 | 172.21 | -0.283 | 171.35 | -0.11  |
| -1.0028  | 172.38 | -0.283 | 171.52 | -0.11  |
| -0.9732  | 172.55 | -0.281 | 171.69 | -0.109 |
| -0.9747  | 172.72 | -0.281 | 171.86 | -0.109 |
| -0.91766 | 172.89 | -0.281 | 172.03 | -0.109 |
| -0.87935 | 173.05 | -0.28  | 172.2  | -0.108 |
| -0.88582 | 173.22 | -0.28  | 172.37 | -0.108 |
| -0.96272 | 173.39 | -0.28  | 172.53 | -0.108 |

|          |        |        |        |        |
|----------|--------|--------|--------|--------|
| -1.0109  | 173.56 | -0.281 | 172.7  | -0.107 |
| -0.91683 | 173.73 | -0.281 | 172.87 | -0.107 |
| -0.79488 | 173.9  | -0.281 | 173.04 | -0.107 |
| -0.81702 | 174.07 | -0.279 | 173.21 | -0.106 |
| -0.84084 | 174.24 | -0.279 | 173.38 | -0.106 |
| -0.92633 | 174.41 | -0.278 | 173.55 | -0.105 |
| -0.94056 | 174.58 | -0.278 | 173.72 | -0.105 |
| -0.98637 | 174.75 | -0.279 | 173.89 | -0.105 |
| -0.96289 | 174.92 | -0.28  | 174.06 | -0.105 |
| -0.8967  | 175.09 | -0.282 | 174.23 | -0.104 |
| -0.93549 | 175.26 | -0.283 | 174.4  | -0.104 |
| -0.96783 | 175.43 | -0.286 | 174.56 | -0.104 |
| -0.98471 | 175.6  | -0.288 | 174.73 | -0.104 |
| -0.90134 | 175.77 | -0.29  | 174.9  | -0.103 |
| -0.87145 | 175.94 | -0.291 | 175.07 | -0.103 |
| -0.82658 | 176.11 | -0.292 | 175.24 | -0.103 |
| -0.7423  | 176.28 | -0.293 | 175.41 | -0.103 |
| -0.73306 | 176.45 | -0.294 | 175.58 | -0.103 |
| -0.78733 | 176.62 | -0.295 | 175.75 | -0.103 |
| -0.9111  | 176.79 | -0.296 | 175.92 | -0.102 |
| -0.84057 | 176.96 | -0.297 | 176.09 | -0.102 |
| -0.79615 | 177.13 | -0.299 | 176.26 | -0.102 |
| -0.76288 | 177.3  | -0.298 | 176.43 | -0.102 |
| -0.84917 | 177.47 | -0.297 | 176.6  | -0.102 |
| -0.87471 | 177.64 | -0.296 | 176.76 | -0.101 |
| -0.91034 | 177.81 | -0.297 | 176.93 | -0.101 |
| -0.85689 | 177.98 | -0.297 | 177.1  | -0.101 |
| -0.80092 | 178.15 | -0.297 | 177.27 | -0.101 |
| -0.80027 | 178.32 | -0.298 | 177.44 | -0.1   |
| -0.86391 | 178.49 | -0.298 | 177.61 | -0.1   |
| -0.86987 | 178.66 | -0.298 | 177.78 | -0.1   |
| -0.80584 | 178.83 | -0.298 | 177.95 | -0.1   |
| -0.70732 | 179    | -0.297 | 178.12 | -0.099 |
| -0.67979 | 179.17 | -0.298 | 178.29 | -0.099 |
| -0.67282 | 179.34 | -0.299 | 178.46 | -0.099 |
| -0.80026 | 179.51 | -0.3   | 178.63 | -0.098 |
| -0.91723 | 179.68 | -0.302 | 178.8  | -0.098 |
| -0.95484 | 179.85 | -0.304 | 178.96 | -0.098 |
| -0.8325  | 180.01 | -0.306 | 179.13 | -0.098 |
| -0.7532  | 180.18 | -0.306 | 179.3  | -0.098 |
| -0.6923  | 180.35 | -0.306 | 179.47 | -0.098 |
| -0.70274 | 180.52 | -0.306 | 179.64 | -0.098 |
| -0.71421 | 180.69 | -0.307 | 179.81 | -0.098 |
| -0.74413 | 180.86 | -0.307 | 179.98 | -0.098 |
| -0.71526 | 181.03 | -0.308 | 180.15 | -0.098 |
| -0.6833  | 181.2  | -0.311 | 180.32 | -0.098 |
| -0.69103 | 181.37 | -0.313 | 180.49 | -0.098 |
| -0.68718 | 181.54 | -0.315 | 180.66 | -0.098 |
| -0.71383 | 181.71 | -0.316 | 180.83 | -0.098 |
| -0.7499  | 181.88 | -0.318 | 181    | -0.098 |
| -0.78235 | 182.05 | -0.319 | 181.16 | -0.097 |
| -0.74895 | 182.22 | -0.32  | 181.33 | -0.097 |
| -0.7209  | 182.39 | -0.32  | 181.5  | -0.097 |
| -0.70496 | 182.56 | -0.322 | 181.67 | -0.097 |

|          |        |        |        |        |
|----------|--------|--------|--------|--------|
| -0.78671 | 182.73 | -0.325 | 181.84 | -0.097 |
| -0.82907 | 182.9  | -0.328 | 182.01 | -0.097 |
| -0.84792 | 183.07 | -0.33  | 182.18 | -0.097 |
| -0.76264 | 183.24 | -0.333 | 182.35 | -0.097 |
| -0.74305 | 183.41 | -0.335 | 182.52 | -0.097 |
| -0.78742 | 183.58 | -0.338 | 182.69 | -0.097 |
| -0.80399 | 183.75 | -0.339 | 182.86 | -0.097 |
| -0.7641  | 183.92 | -0.34  | 183.03 | -0.097 |
| -0.71067 | 184.09 | -0.342 | 183.2  | -0.097 |
| -0.70661 | 184.26 | -0.346 | 183.37 | -0.096 |
| -0.75548 | 184.43 | -0.35  | 183.54 | -0.096 |
| -0.74951 | 184.6  | -0.353 | 183.71 | -0.096 |
| -0.67682 | 184.77 | -0.356 | 183.87 | -0.095 |
| -0.58911 | 184.94 | -0.358 | 184.04 | -0.095 |
| -0.56665 | 185.11 | -0.359 | 184.21 | -0.094 |
| -0.60233 | 185.28 | -0.36  | 184.38 | -0.094 |
| -0.533   | 185.45 | -0.361 | 184.55 | -0.093 |
| -0.47718 | 185.62 | -0.363 | 184.72 | -0.093 |
| -0.52943 | 185.79 | -0.365 | 184.89 | -0.092 |
| -0.61364 | 185.96 | -0.369 | 185.06 | -0.092 |
| -0.75802 | 186.13 | -0.371 | 185.23 | -0.091 |
| -0.75299 | 186.3  | -0.373 | 185.4  | -0.091 |
| -0.69063 | 186.47 | -0.373 | 185.57 | -0.091 |
| -0.60418 | 186.64 | -0.371 | 185.74 | -0.091 |
| -0.55816 | 186.81 | -0.37  | 185.91 | -0.091 |
| -0.64478 | 186.98 | -0.37  | 186.08 | -0.091 |
| -0.6403  | 187.15 | -0.371 | 186.25 | -0.091 |
| -0.65872 | 187.32 | -0.373 | 186.42 | -0.092 |
| -0.6625  | 187.49 | -0.375 | 186.59 | -0.092 |
| -0.74257 | 187.66 | -0.378 | 186.76 | -0.093 |
| -0.74507 | 187.83 | -0.382 | 186.92 | -0.093 |
| -0.68132 | 188    | -0.386 | 187.09 | -0.094 |
| -0.61765 | 188.17 | -0.389 | 187.26 | -0.095 |
| -0.6323  | 188.34 | -0.392 | 187.43 | -0.096 |
| -0.65401 | 188.51 | -0.394 | 187.6  | -0.097 |
| -0.64702 | 188.68 | -0.396 | 187.77 | -0.099 |
| -0.62542 | 188.85 | -0.398 | 187.94 | -0.1   |
| -0.61107 | 189.02 | -0.4   | 188.11 | -0.101 |
| -0.61052 | 189.19 | -0.402 | 188.28 | -0.103 |
| -0.58266 | 189.36 | -0.404 | 188.45 | -0.104 |
| -0.60418 | 189.53 | -0.408 | 188.62 | -0.106 |
| -0.60125 | 189.7  | -0.41  | 188.79 | -0.107 |
| -0.61393 | 189.87 | -0.411 | 188.96 | -0.109 |
| -0.61024 | 190.04 | -0.412 | 189.13 | -0.11  |
| -0.60142 | 190.21 | -0.413 | 189.3  | -0.112 |
| -0.60489 | 190.38 | -0.415 | 189.47 | -0.113 |
| -0.58524 | 190.55 | -0.418 | 189.64 | -0.115 |
| -0.58002 | 190.72 | -0.422 | 189.81 | -0.116 |
| -0.61352 | 190.89 | -0.425 | 189.98 | -0.117 |
| -0.65135 | 191.06 | -0.428 | 190.14 | -0.119 |
| -0.61752 | 191.23 | -0.428 | 190.31 | -0.12  |
| -0.51748 | 191.4  | -0.428 | 190.48 | -0.122 |
| -0.52488 | 191.57 | -0.427 | 190.65 | -0.123 |
| -0.62244 | 191.74 | -0.428 | 190.82 | -0.125 |

|          |        |        |        |        |
|----------|--------|--------|--------|--------|
| -0.73068 | 191.91 | -0.43  | 190.99 | -0.126 |
| -0.66834 | 192.08 | -0.432 | 191.16 | -0.128 |
| -0.54517 | 192.25 | -0.433 | 191.33 | -0.129 |
| -0.46362 | 192.42 | -0.436 | 191.5  | -0.131 |
| -0.48471 | 192.59 | -0.439 | 191.67 | -0.133 |
| -0.52137 | 192.76 | -0.44  | 191.84 | -0.134 |
| -0.55714 | 192.93 | -0.441 | 192.01 | -0.136 |
| -0.49467 | 193.1  | -0.441 | 192.18 | -0.138 |
| -0.5079  | 193.27 | -0.441 | 192.35 | -0.14  |
| -0.48977 | 193.44 | -0.441 | 192.52 | -0.141 |
| -0.56773 | 193.61 | -0.443 | 192.69 | -0.143 |
| -0.57737 | 193.78 | -0.444 | 192.86 | -0.145 |
| -0.57234 | 193.95 | -0.446 | 193.03 | -0.147 |
| -0.54075 | 194.12 | -0.447 | 193.2  | -0.148 |
| -0.53177 | 194.29 | -0.447 | 193.37 | -0.15  |
| -0.53029 | 194.46 | -0.448 | 193.54 | -0.152 |
| -0.54279 | 194.63 | -0.448 | 193.71 | -0.154 |
| -0.55329 | 194.8  | -0.45  | 193.88 | -0.155 |
| -0.55988 | 194.97 | -0.451 | 194.05 | -0.157 |
| -0.557   | 195.14 | -0.453 | 194.22 | -0.159 |
| -0.51329 | 195.31 | -0.457 | 194.39 | -0.16  |
| -0.50397 | 195.48 | -0.463 | 194.56 | -0.162 |
| -0.49569 | 195.65 | -0.467 | 194.73 | -0.163 |
| -0.52169 | 195.82 | -0.469 | 194.9  | -0.165 |
| -0.54746 | 195.99 | -0.471 | 195.07 | -0.166 |
| -0.53957 | 196.16 | -0.472 | 195.24 | -0.168 |
| -0.53784 | 196.33 | -0.473 | 195.41 | -0.169 |
| -0.52496 | 196.5  | -0.475 | 195.58 | -0.17  |
| -0.50181 | 196.67 | -0.476 | 195.75 | -0.171 |
| -0.47172 | 196.84 | -0.477 | 195.92 | -0.172 |
| -0.44813 | 197.01 | -0.476 | 196.09 | -0.173 |
| -0.45763 | 197.18 | -0.475 | 196.26 | -0.173 |
| -0.45448 | 197.35 | -0.474 | 196.43 | -0.174 |
| -0.41794 | 197.52 | -0.474 | 196.6  | -0.174 |
| -0.44516 | 197.69 | -0.475 | 196.77 | -0.174 |
| -0.48111 | 197.86 | -0.477 | 196.94 | -0.175 |
| -0.5226  | 198.04 | -0.479 | 197.11 | -0.175 |
| -0.52283 | 198.21 | -0.481 | 197.28 | -0.175 |
| -0.48474 | 198.38 | -0.483 | 197.45 | -0.175 |
| -0.45129 | 198.55 | -0.487 | 197.62 | -0.175 |
| -0.40646 | 198.72 | -0.49  | 197.79 | -0.176 |
| -0.40972 | 198.89 | -0.492 | 197.96 | -0.176 |
| -0.4359  | 199.06 | -0.495 | 198.12 | -0.176 |
| -0.44809 | 199.23 | -0.495 | 198.29 | -0.176 |
| -0.46041 | 199.4  | -0.493 | 198.46 | -0.177 |
| -0.43911 | 199.57 | -0.491 | 198.63 | -0.177 |
| -0.47247 | 199.74 | -0.488 | 198.8  | -0.177 |
| -0.44569 | 199.91 | -0.488 | 198.97 | -0.178 |
| -0.42877 | 200.08 | -0.49  | 199.14 | -0.178 |
| -0.38022 | 200.25 | -0.491 | 199.31 | -0.179 |
| -0.38736 | 200.42 | -0.493 | 199.48 | -0.18  |
| -0.43845 | 200.59 | -0.493 | 199.65 | -0.181 |
| -0.46868 | 200.76 | -0.494 | 199.82 | -0.182 |
| -0.473   | 200.93 | -0.494 | 199.99 | -0.184 |



|          |        |        |        |        |
|----------|--------|--------|--------|--------|
| -0.44607 | 201.1  | -0.493 | 200.16 | -0.185 |
| -0.46776 | 201.27 | -0.493 | 200.34 | -0.187 |
| -0.47732 | 201.44 | -0.493 | 200.51 | -0.188 |
| -0.45073 | 201.61 | -0.494 | 200.68 | -0.19  |
| -0.39492 | 201.78 | -0.495 | 200.85 | -0.192 |
| -0.37811 | 201.95 | -0.496 | 201.02 | -0.194 |
| -0.37453 | 202.12 | -0.496 | 201.19 | -0.196 |
| -0.37012 | 202.3  | -0.495 | 201.36 | -0.199 |
| -0.36487 | 202.47 | -0.493 | 201.53 | -0.201 |
| -0.37488 | 202.64 | -0.493 | 201.7  | -0.203 |
| -0.3974  | 202.81 | -0.492 | 201.87 | -0.206 |
| -0.41617 | 202.98 | -0.492 | 202.04 | -0.208 |
| -0.47883 | 203.15 | -0.492 | 202.21 | -0.211 |
| -0.46062 | 203.32 | -0.493 | 202.38 | -0.213 |
| -0.40118 | 203.49 | -0.495 | 202.55 | -0.216 |
| -0.29708 | 203.66 | -0.497 | 202.72 | -0.218 |
| -0.30186 | 203.83 | -0.5   | 202.89 | -0.221 |
| -0.38582 | 204    | -0.5   | 203.06 | -0.224 |
| -0.46095 | 204.17 | -0.499 | 203.23 | -0.226 |
| -0.46258 | 204.34 | -0.499 | 203.4  | -0.229 |
| -0.41126 | 204.51 | -0.5   | 203.57 | -0.231 |
| -0.3519  | 204.68 | -0.501 | 203.74 | -0.234 |
| -0.29195 | 204.85 | -0.503 | 203.91 | -0.236 |
| -0.28501 | 205.02 | -0.504 | 204.08 | -0.239 |
| -0.31176 | 205.19 | -0.504 | 204.25 | -0.241 |
| -0.37079 | 205.36 | -0.502 | 204.42 | -0.244 |
| -0.377   | 205.53 | -0.5   | 204.59 | -0.246 |
| -0.35455 | 205.71 | -0.499 | 204.76 | -0.249 |
| -0.34368 | 205.88 | -0.499 | 204.93 | -0.252 |
| -0.34232 | 206.05 | -0.5   | 205.1  | -0.255 |
| -0.32362 | 206.22 | -0.501 | 205.27 | -0.258 |
| -0.31629 | 206.39 | -0.5   | 205.44 | -0.261 |
| -0.2872  | 206.56 | -0.499 | 205.61 | -0.264 |
| -0.30778 | 206.73 | -0.499 | 205.78 | -0.267 |
| -0.30077 | 206.9  | -0.498 | 205.95 | -0.27  |
| -0.32439 | 207.07 | -0.497 | 206.12 | -0.274 |
| -0.34164 | 207.24 | -0.496 | 206.29 | -0.277 |
| -0.36706 | 207.41 | -0.495 | 206.46 | -0.281 |
| -0.37195 | 207.58 | -0.494 | 206.63 | -0.284 |
| -0.36175 | 207.75 | -0.491 | 206.8  | -0.288 |
| -0.31724 | 207.92 | -0.49  | 206.97 | -0.291 |
| -0.30497 | 208.09 | -0.491 | 207.14 | -0.294 |
| -0.3039  | 208.26 | -0.495 | 207.32 | -0.298 |
| -0.30454 | 208.43 | -0.5   | 207.49 | -0.301 |
| -0.2902  | 208.6  | -0.503 | 207.66 | -0.305 |
| -0.26921 | 208.78 | -0.504 | 207.83 | -0.308 |
| -0.29863 | 208.95 | -0.504 | 208    | -0.311 |
| -0.30331 | 209.12 | -0.505 | 208.17 | -0.314 |
| -0.29553 | 209.29 | -0.507 | 208.34 | -0.317 |
| -0.30652 | 209.46 | -0.509 | 208.51 | -0.321 |
| -0.33536 | 209.63 | -0.51  | 208.68 | -0.324 |
| -0.34001 | 209.8  | -0.512 | 208.85 | -0.327 |
| -0.32116 | 209.97 | -0.512 | 209.02 | -0.33  |
| -0.31036 | 210.14 | -0.512 | 209.19 | -0.334 |

|          |        |        |        |        |
|----------|--------|--------|--------|--------|
| -0.30476 | 210.31 | -0.511 | 209.36 | -0.337 |
| -0.3058  | 210.48 | -0.511 | 209.53 | -0.341 |
| -0.28863 | 210.65 | -0.512 | 209.7  | -0.344 |
| -0.28076 | 210.82 | -0.514 | 209.87 | -0.348 |
| -0.26182 | 210.99 | -0.515 | 210.04 | -0.351 |
| -0.24319 | 211.17 | -0.516 | 210.21 | -0.354 |
| -0.25359 | 211.34 | -0.515 | 210.38 | -0.358 |
| -0.25227 | 211.51 | -0.515 | 210.55 | -0.361 |
| -0.28361 | 211.68 | -0.518 | 210.72 | -0.364 |
| -0.31051 | 211.85 | -0.521 | 210.9  | -0.367 |
| -0.31254 | 212.02 | -0.525 | 211.07 | -0.37  |
| -0.2825  | 212.19 | -0.528 | 211.24 | -0.374 |
| -0.2444  | 212.36 | -0.53  | 211.41 | -0.377 |
| -0.22513 | 212.53 | -0.531 | 211.58 | -0.38  |
| -0.20669 | 212.7  | -0.533 | 211.75 | -0.383 |
| -0.22601 | 212.87 | -0.534 | 211.92 | -0.387 |
| -0.25903 | 213.04 | -0.534 | 212.09 | -0.39  |
| -0.28077 | 213.22 | -0.534 | 212.26 | -0.394 |
| -0.27581 | 213.39 | -0.534 | 212.43 | -0.397 |
| -0.26523 | 213.56 | -0.534 | 212.6  | -0.401 |
| -0.28302 | 213.73 | -0.534 | 212.77 | -0.405 |
| -0.27716 | 213.9  | -0.535 | 212.94 | -0.409 |
| -0.27325 | 214.07 | -0.538 | 213.11 | -0.413 |
| -0.26101 | 214.24 | -0.543 | 213.28 | -0.417 |
| -0.23323 | 214.41 | -0.548 | 213.45 | -0.421 |
| -0.2186  | 214.58 | -0.553 | 213.62 | -0.426 |
| -0.20182 | 214.75 | -0.556 | 213.8  | -0.431 |
| -0.23236 | 214.92 | -0.558 | 213.97 | -0.436 |
| -0.22814 | 215.09 | -0.561 | 214.14 | -0.441 |
| -0.25862 | 215.26 | -0.564 | 214.31 | -0.447 |
| -0.26088 | 215.44 | -0.567 | 214.48 | -0.452 |
| -0.28568 | 215.61 | -0.57  | 214.65 | -0.458 |
| -0.24863 | 215.78 | -0.571 | 214.82 | -0.464 |
| -0.24386 | 215.95 | -0.571 | 214.99 | -0.47  |
| -0.2063  | 216.12 | -0.572 | 215.16 | -0.476 |
| -0.22073 | 216.29 | -0.576 | 215.33 | -0.482 |
| -0.19122 | 216.46 | -0.58  | 215.5  | -0.488 |
| -0.21938 | 216.63 | -0.584 | 215.67 | -0.495 |
| -0.23172 | 216.8  | -0.585 | 215.84 | -0.501 |
| -0.23219 | 216.97 | -0.587 | 216.01 | -0.508 |
| -0.22149 | 217.14 | -0.586 | 216.18 | -0.515 |
| -0.20053 | 217.32 | -0.586 | 216.36 | -0.521 |
| -0.235   | 217.49 | -0.587 | 216.53 | -0.528 |
| -0.22377 | 217.66 | -0.588 | 216.7  | -0.535 |
| -0.21349 | 217.83 | -0.589 | 216.87 | -0.542 |
| -0.19061 | 218    | -0.589 | 217.04 | -0.549 |
| -0.19427 | 218.17 | -0.589 | 217.21 | -0.555 |
| -0.18843 | 218.34 | -0.591 | 217.38 | -0.562 |
| -0.16809 | 218.51 | -0.596 | 217.55 | -0.568 |
| -0.13134 | 218.68 | -0.604 | 217.72 | -0.575 |
| -0.13883 | 218.85 | -0.61  | 217.89 | -0.581 |
| -0.16682 | 219.02 | -0.613 | 218.06 | -0.588 |
| -0.18453 | 219.2  | -0.615 | 218.23 | -0.594 |
| -0.18338 | 219.37 | -0.616 | 218.4  | -0.6   |

|          |        |        |        |        |
|----------|--------|--------|--------|--------|
| -0.14855 | 219.54 | -0.62  | 218.57 | -0.607 |
| -0.18447 | 219.71 | -0.623 | 218.75 | -0.613 |
| -0.19564 | 219.88 | -0.628 | 218.92 | -0.619 |
| -0.2024  | 220.05 | -0.631 | 219.09 | -0.625 |
| -0.17216 | 220.22 | -0.634 | 219.26 | -0.63  |
| -0.16082 | 220.39 | -0.635 | 219.43 | -0.636 |
| -0.17838 | 220.56 | -0.637 | 219.6  | -0.641 |
| -0.19124 | 220.73 | -0.636 | 219.77 | -0.646 |
| -0.18505 | 220.91 | -0.636 | 219.94 | -0.651 |
| -0.16183 | 221.08 | -0.636 | 220.11 | -0.656 |
| -0.14799 | 221.25 | -0.636 | 220.28 | -0.661 |
| -0.14157 | 221.42 | -0.636 | 220.45 | -0.666 |
| -0.13752 | 221.59 | -0.637 | 220.62 | -0.671 |
| -0.13609 | 221.76 | -0.64  | 220.79 | -0.677 |
| -0.13068 | 221.93 | -0.646 | 220.97 | -0.682 |
| -0.14557 | 222.1  | -0.653 | 221.14 | -0.687 |
| -0.15211 | 222.27 | -0.658 | 221.31 | -0.693 |
| -0.17165 | 222.44 | -0.659 | 221.48 | -0.698 |
| -0.18085 | 222.61 | -0.66  | 221.65 | -0.704 |
| -0.20551 | 222.78 | -0.66  | 221.82 | -0.71  |
| -0.20498 | 222.96 | -0.659 | 221.99 | -0.716 |
| -0.20483 | 223.13 | -0.659 | 222.16 | -0.722 |
| -0.18579 | 223.3  | -0.659 | 222.33 | -0.729 |
| -0.18858 | 223.47 | -0.66  | 222.5  | -0.735 |
| -0.19462 | 223.64 | -0.66  | 222.67 | -0.742 |
| -0.19904 | 223.81 | -0.661 | 222.85 | -0.749 |
| -0.19052 | 223.98 | -0.662 | 223.02 | -0.756 |
| -0.16018 | 224.15 | -0.662 | 223.19 | -0.764 |
| -0.16501 | 224.32 | -0.662 | 223.36 | -0.771 |
| -0.14863 | 224.49 | -0.662 | 223.53 | -0.778 |
| -0.16124 | 224.67 | -0.661 | 223.7  | -0.785 |
| -0.13495 | 224.84 | -0.66  | 223.87 | -0.793 |
| -0.1289  | 225.01 | -0.659 | 224.04 | -0.8   |
| -0.13404 | 225.18 | -0.659 | 224.21 | -0.808 |
| -0.12855 | 225.35 | -0.66  | 224.38 | -0.815 |
| -0.14407 | 225.52 | -0.66  | 224.56 | -0.823 |
| -0.15503 | 225.69 | -0.659 | 224.73 | -0.831 |
| -0.15933 | 225.86 | -0.659 | 224.9  | -0.838 |
| -0.16305 | 226.03 | -0.66  | 225.07 | -0.846 |
| -0.16034 | 226.2  | -0.663 | 225.24 | -0.854 |
| -0.17613 | 226.38 | -0.668 | 225.41 | -0.862 |
| -0.18704 | 226.55 | -0.672 | 225.58 | -0.87  |
| -0.19504 | 226.72 | -0.674 | 225.75 | -0.877 |
| -0.18754 | 226.89 | -0.673 | 225.92 | -0.884 |
| -0.16309 | 227.06 | -0.673 | 226.09 | -0.891 |
| -0.1494  | 227.23 | -0.67  | 226.27 | -0.898 |
| -0.1378  | 227.4  | -0.668 | 226.44 | -0.905 |
| -0.15264 | 227.57 | -0.665 | 226.61 | -0.911 |
| -0.14665 | 227.74 | -0.664 | 226.78 | -0.918 |
| -0.13847 | 227.91 | -0.664 | 226.95 | -0.924 |
| -0.13664 | 228.09 | -0.665 | 227.12 | -0.931 |
| -0.13397 | 228.26 | -0.667 | 227.29 | -0.937 |
| -0.13738 | 228.43 | -0.669 | 227.46 | -0.943 |
| -0.1226  | 228.6  | -0.673 | 227.63 | -0.949 |

|          |        |        |        |        |
|----------|--------|--------|--------|--------|
| -0.10706 | 228.77 | -0.678 | 227.8  | -0.955 |
| -0.11824 | 228.94 | -0.681 | 227.98 | -0.961 |
| -0.12135 | 229.11 | -0.682 | 228.15 | -0.967 |
| -0.14312 | 229.28 | -0.68  | 228.32 | -0.972 |
| -0.14146 | 229.45 | -0.678 | 228.49 | -0.978 |
| -0.13619 | 229.62 | -0.676 | 228.66 | -0.984 |
| -0.13149 | 229.8  | -0.676 | 228.83 | -0.989 |
| -0.14443 | 229.97 | -0.677 | 229    | -0.995 |
| -0.15934 | 230.14 | -0.678 | 229.17 | -1.001 |
| -0.14766 | 230.31 | -0.679 | 229.34 | -1.006 |
| -0.14433 | 230.48 | -0.679 | 229.51 | -1.012 |
| -0.12175 | 230.65 | -0.675 | 229.69 | -1.019 |
| -0.12885 | 230.82 | -0.671 | 229.86 | -1.025 |
| -0.11082 | 230.99 | -0.669 | 230.03 | -1.031 |
| -0.13418 | 231.16 | -0.67  | 230.2  | -1.036 |
| -0.13856 | 231.33 | -0.672 | 230.37 | -1.042 |
| -0.13383 | 231.5  | -0.673 | 230.54 | -1.048 |
| -0.13044 | 231.67 | -0.673 | 230.71 | -1.053 |
| -0.1444  | 231.84 | -0.673 | 230.88 | -1.059 |
| -0.15614 | 232.01 | -0.675 | 231.05 | -1.064 |
| -0.15597 | 232.18 | -0.677 | 231.22 | -1.07  |
| -0.17321 | 232.35 | -0.679 | 231.39 | -1.075 |
| -0.18923 | 232.52 | -0.679 | 231.56 | -1.08  |
| -0.18361 | 232.69 | -0.679 | 231.73 | -1.085 |
| -0.16114 | 232.86 | -0.679 | 231.9  | -1.089 |
| -0.14757 | 233.03 | -0.679 | 232.07 | -1.094 |
| -0.14202 | 233.2  | -0.68  | 232.24 | -1.099 |
| -0.13388 | 233.37 | -0.681 | 232.41 | -1.103 |
| -0.14607 | 233.54 | -0.683 | 232.58 | -1.108 |
| -0.16015 | 233.71 | -0.685 | 232.75 | -1.112 |
| -0.14948 | 233.88 | -0.686 | 232.92 | -1.116 |
| -0.13755 | 234.05 | -0.687 | 233.09 | -1.12  |
| -0.14597 | 234.22 | -0.688 | 233.26 | -1.124 |
| -0.16484 | 234.39 | -0.691 | 233.43 | -1.128 |
| -0.1975  | 234.56 | -0.692 | 233.6  | -1.132 |
| -0.20383 | 234.73 | -0.69  | 233.77 | -1.136 |
| -0.19106 | 234.9  | -0.685 | 233.94 | -1.14  |
| -0.16257 | 235.07 | -0.68  | 234.11 | -1.144 |
| -0.1583  | 235.24 | -0.676 | 234.28 | -1.148 |
| -0.17297 | 235.41 | -0.677 | 234.44 | -1.152 |
| -0.19927 | 235.57 | -0.68  | 234.61 | -1.156 |
| -0.21045 | 235.74 | -0.682 | 234.78 | -1.16  |
| -0.23818 | 235.91 | -0.683 | 234.95 | -1.164 |
| -0.2307  | 236.08 | -0.683 | 235.12 | -1.167 |
| -0.25598 | 236.25 | -0.685 | 235.29 | -1.171 |
| -0.27779 | 236.42 | -0.687 | 235.46 | -1.175 |
| -0.28953 | 236.59 | -0.69  | 235.63 | -1.179 |
| -0.27998 | 236.76 | -0.689 | 235.8  | -1.183 |
| -0.27511 | 236.93 | -0.687 | 235.97 | -1.187 |
| -0.26261 | 237.1  | -0.684 | 236.14 | -1.191 |
| -0.23094 | 237.27 | -0.681 | 236.31 | -1.195 |
| -0.22609 | 237.44 | -0.678 | 236.48 | -1.2   |
| -0.24001 | 237.6  | -0.676 | 236.64 | -1.204 |
| -0.26604 | 237.77 | -0.677 | 236.81 | -1.209 |

|          |        |        |        |        |
|----------|--------|--------|--------|--------|
| -0.27834 | 237.94 | -0.68  | 236.98 | -1.213 |
| -0.29629 | 238.11 | -0.683 | 237.15 | -1.218 |
| -0.32689 | 238.28 | -0.684 | 237.32 | -1.223 |
| -0.34323 | 238.45 | -0.686 | 237.49 | -1.228 |
| -0.36025 | 238.62 | -0.688 | 237.66 | -1.233 |
| -0.33508 | 238.79 | -0.69  | 237.83 | -1.238 |
| -0.32051 | 238.96 | -0.691 | 238    | -1.244 |
| -0.29399 | 239.12 | -0.693 | 238.17 | -1.249 |
| -0.29871 | 239.29 | -0.694 | 238.33 | -1.255 |
| -0.27643 | 239.46 | -0.694 | 238.5  | -1.26  |
| -0.30609 | 239.63 | -0.692 | 238.67 | -1.266 |
| -0.34538 | 239.8  | -0.691 | 238.84 | -1.272 |
| -0.3887  | 239.97 | -0.688 | 239.01 | -1.278 |
| -0.38631 | 240.14 | -0.686 | 239.18 | -1.284 |
| -0.36199 | 240.31 | -0.685 | 239.35 | -1.289 |
| -0.33741 | 240.47 | -0.685 | 239.52 | -1.295 |
| -0.37108 | 240.64 | -0.685 | 239.68 | -1.301 |
| -0.41403 | 240.81 | -0.685 | 239.85 | -1.307 |
| -0.4466  | 240.98 | -0.688 | 240.02 | -1.312 |
| -0.41427 | 241.15 | -0.692 | 240.19 | -1.317 |
| -0.44517 | 241.32 | -0.695 | 240.36 | -1.323 |
| -0.53113 | 241.49 | -0.694 | 240.53 | -1.328 |
| -0.57838 | 241.65 | -0.693 | 240.7  | -1.333 |
| -0.53703 | 241.82 | -0.694 | 240.87 | -1.338 |
| -0.47684 | 241.99 | -0.696 | 241.03 | -1.343 |
| -0.48406 | 242.16 | -0.698 | 241.2  | -1.348 |
| -0.55673 | 242.33 | -0.696 | 241.37 | -1.353 |
| -0.56541 | 242.5  | -0.696 | 241.54 | -1.358 |
| -0.56277 | 242.66 | -0.696 | 241.71 | -1.363 |
| -0.55303 | 242.83 | -0.699 | 241.88 | -1.369 |
| -0.59666 | 243    | -0.7   | 242.05 | -1.374 |
| -0.6333  | 243.17 | -0.702 | 242.21 | -1.379 |
| -0.64006 | 243.34 | -0.704 | 242.38 | -1.384 |
| -0.60562 | 243.51 | -0.71  | 242.55 | -1.389 |
| -0.59212 | 243.68 | -0.716 | 242.72 | -1.394 |
| -0.60974 | 243.84 | -0.719 | 242.89 | -1.398 |
| -0.68718 | 244.01 | -0.721 | 243.06 | -1.403 |
| -0.68696 | 244.18 | -0.723 | 243.22 | -1.408 |
| -0.65662 | 244.35 | -0.726 | 243.39 | -1.413 |
| -0.70923 | 244.52 | -0.729 | 243.56 | -1.418 |
| -0.76443 | 244.69 | -0.731 | 243.73 | -1.422 |
| -0.87091 | 244.85 | -0.732 | 243.9  | -1.427 |
| -0.8316  | 245.02 | -0.732 | 244.07 | -1.432 |
| -0.86626 | 245.19 | -0.731 | 244.23 | -1.436 |
| -0.88789 | 245.36 | -0.732 | 244.4  | -1.441 |
| -0.83114 | 245.53 | -0.734 | 244.57 | -1.446 |
| -0.80024 | 245.7  | -0.734 | 244.74 | -1.451 |
| -0.76745 | 245.86 | -0.734 | 244.91 | -1.457 |
| -0.88341 | 246.03 | -0.735 | 245.08 | -1.462 |
| -0.98928 | 246.2  | -0.739 | 245.24 | -1.468 |
| -1.02568 | 246.37 | -0.743 | 245.41 | -1.474 |
| -1.02528 | 246.54 | -0.745 | 245.58 | -1.48  |
| -0.97509 | 246.7  | -0.747 | 245.75 | -1.486 |
| -0.91489 | 246.87 | -0.751 | 245.92 | -1.493 |

|          |        |        |        |        |
|----------|--------|--------|--------|--------|
| -0.9147  | 247.04 | -0.754 | 246.09 | -1.499 |
| -0.99185 | 247.21 | -0.758 | 246.26 | -1.506 |
| -1.11041 | 247.38 | -0.76  | 246.42 | -1.513 |
| -1.17443 | 247.55 | -0.763 | 246.59 | -1.52  |
| -1.2932  | 247.71 | -0.764 | 246.76 | -1.527 |
| -1.37454 | 247.88 | -0.768 | 246.93 | -1.535 |
| -1.41556 | 248.05 | -0.773 | 247.1  | -1.542 |
| -1.35578 | 248.22 | -0.777 | 247.26 | -1.55  |
| -1.29166 | 248.39 | -0.781 | 247.43 | -1.557 |
| -1.33454 | 248.56 | -0.786 | 247.6  | -1.565 |
| -1.35086 | 248.72 | -0.792 | 247.77 | -1.573 |
| -1.48113 | 248.89 | -0.796 | 247.94 | -1.581 |
| -1.55854 | 249.06 | -0.799 | 248.11 | -1.589 |
| -1.57254 | 249.23 | -0.801 | 248.27 | -1.597 |
| -1.63461 | 249.4  | -0.802 | 248.44 | -1.604 |
| -1.6757  | 249.56 | -0.803 | 248.61 | -1.612 |
| -1.83399 | 249.73 | -0.804 | 248.78 | -1.62  |
| -1.88415 | 249.9  | -0.808 | 248.95 | -1.628 |
| -1.90262 | 250.07 | -0.813 | 249.12 | -1.636 |
| -1.94885 | 250.24 | -0.817 | 249.28 | -1.644 |
| -1.95118 | 250.41 | -0.819 | 249.45 | -1.652 |
| -1.96321 | 250.57 | -0.821 | 249.62 | -1.659 |
| -1.97537 | 250.74 | -0.824 | 249.79 | -1.667 |
| -2.09996 | 250.91 | -0.829 | 249.96 | -1.675 |
| -2.29084 | 251.08 | -0.835 | 250.12 | -1.682 |
| -2.26138 | 251.25 | -0.84  | 250.29 | -1.69  |
| -2.28339 | 251.41 | -0.844 | 250.46 | -1.698 |
| -2.19532 | 251.58 | -0.849 | 250.63 | -1.706 |
| -2.31546 | 251.75 | -0.853 | 250.8  | -1.714 |
| -2.48706 | 251.92 | -0.857 | 250.96 | -1.722 |
| -2.59848 | 252.09 | -0.862 | 251.13 | -1.73  |
| -2.69124 | 252.26 | -0.868 | 251.3  | -1.738 |
| -2.61963 | 252.42 | -0.874 | 251.47 | -1.746 |
| -2.84146 | 252.59 | -0.877 | 251.64 | -1.755 |
| -2.88776 | 252.76 | -0.878 | 251.81 | -1.763 |
| -3.02298 | 252.93 | -0.879 | 251.97 | -1.772 |
| -2.99759 | 253.1  | -0.883 | 252.14 | -1.78  |
| -3.09685 | 253.26 | -0.887 | 252.31 | -1.789 |
| -3.12853 | 253.43 | -0.891 | 252.48 | -1.797 |
| -3.23964 | 253.6  | -0.895 | 252.65 | -1.805 |
| -3.30701 | 253.77 | -0.899 | 252.81 | -1.814 |
| -3.50823 | 253.94 | -0.905 | 252.98 | -1.822 |
| -3.53707 | 254.11 | -0.911 | 253.15 | -1.831 |
| -3.70349 | 254.27 | -0.919 | 253.32 | -1.84  |
| -3.72562 | 254.44 | -0.927 | 253.49 | -1.849 |
| -3.80778 | 254.61 | -0.932 | 253.66 | -1.858 |
| -3.78552 | 254.78 | -0.936 | 253.82 | -1.867 |
| -3.92919 | 254.95 | -0.938 | 253.99 | -1.876 |
| -4.08051 | 255.11 | -0.942 | 254.16 | -1.886 |
| -4.17666 | 255.28 | -0.944 | 254.33 | -1.895 |
| -4.16579 | 255.45 | -0.948 | 254.5  | -1.905 |
| -4.29032 | 255.62 | -0.951 | 254.66 | -1.914 |
| -4.43711 | 255.79 | -0.957 | 254.83 | -1.924 |
| -4.59785 | 255.95 | -0.962 | 255    | -1.934 |

|           |        |        |        |        |
|-----------|--------|--------|--------|--------|
| -4.66897  | 256.12 | -0.967 | 255.17 | -1.943 |
| -4.91802  | 256.29 | -0.971 | 255.34 | -1.953 |
| -4.83345  | 256.46 | -0.974 | 255.51 | -1.962 |
| -4.90018  | 256.63 | -0.978 | 255.67 | -1.971 |
| -4.99745  | 256.8  | -0.983 | 255.84 | -1.981 |
| -5.22198  | 256.96 | -0.992 | 256.01 | -1.99  |
| -5.3623   | 257.13 | -1.002 | 256.18 | -2     |
| -5.48669  | 257.3  | -1.01  | 256.35 | -2.009 |
| -5.64843  | 257.47 | -1.015 | 256.51 | -2.018 |
| -5.67447  | 257.64 | -1.02  | 256.68 | -2.027 |
| -5.61484  | 257.8  | -1.028 | 256.85 | -2.036 |
| -5.82008  | 257.97 | -1.037 | 257.02 | -2.045 |
| -5.99681  | 258.14 | -1.045 | 257.19 | -2.054 |
| -6.20589  | 258.31 | -1.051 | 257.35 | -2.063 |
| -6.07773  | 258.48 | -1.056 | 257.52 | -2.072 |
| -6.24816  | 258.65 | -1.062 | 257.69 | -2.081 |
| -6.2858   | 258.81 | -1.067 | 257.86 | -2.09  |
| -6.55563  | 258.98 | -1.073 | 258.03 | -2.099 |
| -6.60585  | 259.15 | -1.08  | 258.19 | -2.108 |
| -6.74283  | 259.32 | -1.085 | 258.36 | -2.117 |
| -6.81278  | 259.49 | -1.091 | 258.53 | -2.127 |
| -6.98552  | 259.65 | -1.098 | 258.7  | -2.136 |
| -7.07187  | 259.82 | -1.104 | 258.87 | -2.146 |
| -7.20728  | 259.99 | -1.107 | 259.04 | -2.156 |
| -7.33025  | 260.16 | -1.11  | 259.2  | -2.166 |
| -7.50864  | 260.33 | -1.118 | 259.37 | -2.176 |
| -7.70557  | 260.5  | -1.127 | 259.54 | -2.186 |
| -7.78827  | 260.66 | -1.136 | 259.71 | -2.196 |
| -7.84121  | 260.83 | -1.138 | 259.88 | -2.206 |
| -7.95392  | 261    | -1.142 | 260.04 | -2.216 |
| -8.12305  | 261.17 | -1.15  | 260.21 | -2.227 |
| -8.33764  | 261.34 | -1.162 | 260.38 | -2.237 |
| -8.36927  | 261.5  | -1.171 | 260.55 | -2.248 |
| -8.37307  | 261.67 | -1.174 | 260.72 | -2.258 |
| -8.54004  | 261.84 | -1.176 | 260.89 | -2.269 |
| -8.88501  | 262.01 | -1.182 | 261.05 | -2.279 |
| -9.15358  | 262.18 | -1.189 | 261.22 | -2.29  |
| -9.20431  | 262.35 | -1.196 | 261.39 | -2.3   |
| -9.21841  | 262.51 | -1.201 | 261.56 | -2.31  |
| -9.21911  | 262.68 | -1.209 | 261.73 | -2.32  |
| -9.49108  | 262.85 | -1.218 | 261.9  | -2.331 |
| -9.61129  | 263.02 | -1.23  | 262.06 | -2.341 |
| -9.98296  | 263.19 | -1.238 | 262.23 | -2.351 |
| -10.21336 | 263.35 | -1.245 | 262.4  | -2.361 |
| -10.53047 | 263.52 | -1.251 | 262.57 | -2.371 |
| -10.61908 | 263.69 | -1.261 | 262.74 | -2.381 |
| -10.57616 | 263.86 | -1.271 | 262.91 | -2.391 |
| -10.78864 | 264.03 | -1.278 | 263.07 | -2.402 |
| -11.13734 | 264.19 | -1.282 | 263.24 | -2.412 |
| -11.82144 | 264.36 | -1.288 | 263.41 | -2.422 |
| -11.90395 | 264.53 | -1.299 | 263.58 | -2.432 |
| -11.8599  | 264.7  | -1.31  | 263.75 | -2.442 |
| -11.58763 | 264.87 | -1.319 | 263.92 | -2.452 |
| -11.62819 | 265.04 | -1.326 | 264.08 | -2.462 |

|           |        |        |        |        |
|-----------|--------|--------|--------|--------|
| -11.78585 | 265.2  | -1.334 | 264.25 | -2.471 |
| -11.92202 | 265.37 | -1.343 | 264.42 | -2.481 |
| -12.11911 | 265.54 | -1.346 | 264.59 | -2.491 |
| -12.31546 | 265.71 | -1.347 | 264.76 | -2.501 |
| -12.4303  | 265.88 | -1.351 | 264.92 | -2.512 |
| -12.68394 | 266.05 | -1.361 | 265.09 | -2.522 |
| -12.90359 | 266.21 | -1.375 | 265.26 | -2.532 |
| -13.19959 | 266.38 | -1.386 | 265.43 | -2.542 |
| -13.05659 | 266.55 | -1.395 | 265.6  | -2.552 |
| -13.12799 | 266.72 | -1.403 | 265.77 | -2.562 |
| -13.00786 | 266.89 | -1.412 | 265.93 | -2.572 |
| -13.08767 | 267.06 | -1.422 | 266.1  | -2.582 |
| -13.02753 | 267.22 | -1.433 | 266.27 | -2.593 |
| -13.2557  | 267.39 | -1.442 | 266.44 | -2.603 |
| -13.32812 | 267.56 | -1.45  | 266.61 | -2.613 |
| -13.32819 | 267.73 | -1.458 | 266.78 | -2.624 |
| -13.20769 | 267.9  | -1.469 | 266.94 | -2.634 |
| -13.20317 | 268.07 | -1.479 | 267.11 | -2.644 |
| -13.28597 | 268.23 | -1.486 | 267.28 | -2.655 |
| -13.30528 | 268.4  | -1.493 | 267.45 | -2.665 |
| -13.45739 | 268.57 | -1.504 | 267.62 | -2.676 |
| -13.4993  | 268.74 | -1.514 | 267.79 | -2.687 |
| -13.45982 | 268.91 | -1.523 | 267.96 | -2.698 |
| -13.51139 | 269.07 | -1.532 | 268.12 | -2.708 |
| -13.69957 | 269.24 | -1.544 | 268.29 | -2.719 |
| -13.853   | 269.41 | -1.557 | 268.46 | -2.73  |
| -13.94421 | 269.58 | -1.57  | 268.63 | -2.74  |
| -13.87671 | 269.75 | -1.577 | 268.8  | -2.751 |
| -13.80715 | 269.92 | -1.585 | 268.97 | -2.761 |
| -13.77277 | 270.08 | -1.595 | 269.13 | -2.771 |
| -13.69858 | 270.25 | -1.609 | 269.3  | -2.782 |
| -13.71866 | 270.42 | -1.622 | 269.47 | -2.792 |
| -13.68727 | 270.59 | -1.636 | 269.64 | -2.803 |
| -13.71519 | 270.76 | -1.646 | 269.81 | -2.813 |
| -13.87704 | 270.93 | -1.659 | 269.98 | -2.823 |
| -13.80785 | 271.09 | -1.669 | 270.14 | -2.833 |
| -13.83733 | 271.26 | -1.677 | 270.31 | -2.842 |
| -13.83071 | 271.43 | -1.685 | 270.48 | -2.852 |
| -13.95204 | 271.6  | -1.692 | 270.65 | -2.862 |
| -14.03237 | 271.77 | -1.704 | 270.82 | -2.872 |
| -13.98646 | 271.94 | -1.716 | 270.99 | -2.882 |
| -13.97411 | 272.11 | -1.729 | 271.15 | -2.892 |
| -13.77272 | 272.27 | -1.737 | 271.32 | -2.901 |
| -13.72333 | 272.44 | -1.748 | 271.49 | -2.911 |
| -13.64797 | 272.61 | -1.763 | 271.66 | -2.921 |
| -13.61638 | 272.78 | -1.779 | 271.83 | -2.93  |
| -13.60196 | 272.95 | -1.791 | 272    | -2.94  |
| -13.64716 | 273.12 | -1.797 | 272.17 | -2.949 |
| -13.65365 | 273.29 | -1.805 | 272.33 | -2.959 |
| -13.56878 | 273.45 | -1.818 | 272.5  | -2.968 |
| -13.45558 | 273.62 | -1.833 | 272.67 | -2.977 |
| -13.48464 | 273.79 | -1.842 | 272.84 | -2.986 |
| -13.57495 | 273.96 | -1.851 | 273.01 | -2.995 |
| -13.53812 | 274.13 | -1.865 | 273.18 | -3.004 |



|           |        |        |        |        |
|-----------|--------|--------|--------|--------|
| -13.49641 | 274.3  | -1.886 | 273.35 | -3.013 |
| -13.36128 | 274.46 | -1.9   | 273.51 | -3.022 |
| -13.39989 | 274.63 | -1.915 | 273.68 | -3.031 |
| -13.32883 | 274.8  | -1.922 | 273.85 | -3.039 |
| -13.48256 | 274.97 | -1.93  | 274.02 | -3.048 |
| -13.35016 | 275.14 | -1.937 | 274.19 | -3.057 |
| -13.30301 | 275.31 | -1.947 | 274.36 | -3.065 |
| -13.08565 | 275.48 | -1.966 | 274.53 | -3.074 |
| -13.15117 | 275.64 | -1.98  | 274.69 | -3.082 |
| -13.22131 | 275.81 | -1.994 | 274.86 | -3.091 |
| -13.20731 | 275.98 | -2.006 | 275.03 | -3.099 |
| -13.125   | 276.15 | -2.022 | 275.2  | -3.107 |
| -13.07588 | 276.32 | -2.04  | 275.37 | -3.116 |
| -12.9335  | 276.49 | -2.056 | 275.54 | -3.124 |
| -12.91742 | 276.66 | -2.071 | 275.71 | -3.132 |
| -12.86384 | 276.82 | -2.082 | 275.88 | -3.14  |
| -12.96534 | 276.99 | -2.095 | 276.04 | -3.147 |
| -12.86845 | 277.16 | -2.109 | 276.21 | -3.155 |
| -12.79971 | 277.33 | -2.129 | 276.38 | -3.163 |
| -12.75331 | 277.5  | -2.142 | 276.55 | -3.17  |
| -12.6593  | 277.67 | -2.152 | 276.72 | -3.177 |
| -12.52574 | 277.83 | -2.159 | 276.89 | -3.185 |
| -12.47657 | 278    | -2.173 | 277.06 | -3.192 |
| -12.53523 | 278.17 | -2.189 | 277.22 | -3.199 |
| -12.58124 | 278.34 | -2.206 | 277.39 | -3.206 |
| -12.43068 | 278.51 | -2.22  | 277.56 | -3.212 |
| -12.295   | 278.68 | -2.231 | 277.73 | -3.218 |
| -12.27358 | 278.85 | -2.242 | 277.9  | -3.224 |
| -12.3221  | 279.02 | -2.257 | 278.07 | -3.23  |
| -12.2635  | 279.18 | -2.27  | 278.24 | -3.236 |
| -12.23627 | 279.35 | -2.282 | 278.41 | -3.242 |
| -12.06652 | 279.52 | -2.293 | 278.58 | -3.247 |
| -12.06527 | 279.69 | -2.31  | 278.74 | -3.252 |
| -11.89806 | 279.86 | -2.33  | 278.91 | -3.256 |
| -11.84446 | 280.03 | -2.347 | 279.08 | -3.26  |
| -11.86863 | 280.2  | -2.361 | 279.25 | -3.264 |
| -11.87303 | 280.36 | -2.369 | 279.42 | -3.268 |
| -11.87277 | 280.53 | -2.38  | 279.59 | -3.271 |
| -11.69879 | 280.7  | -2.394 | 279.76 | -3.274 |
| -11.55116 | 280.87 | -2.411 | 279.93 | -3.277 |
| -11.46229 | 281.04 | -2.424 | 280.1  | -3.28  |
| -11.40007 | 281.21 | -2.433 | 280.26 | -3.282 |
| -11.46936 | 281.38 | -2.447 | 280.43 | -3.284 |
| -11.47111 | 281.54 | -2.461 | 280.6  | -3.285 |
| -11.45811 | 281.71 | -2.48  | 280.77 | -3.287 |
| -11.30494 | 281.88 | -2.49  | 280.94 | -3.289 |
| -11.24915 | 282.05 | -2.5   | 281.11 | -3.29  |
| -11.17485 | 282.22 | -2.511 | 281.28 | -3.292 |
| -11.11068 | 282.39 | -2.53  | 281.45 | -3.293 |
| -10.95296 | 282.56 | -2.547 | 281.62 | -3.294 |
| -10.88337 | 282.72 | -2.557 | 281.78 | -3.294 |
| -10.7709  | 282.89 | -2.564 | 281.95 | -3.295 |
| -10.77894 | 283.06 | -2.576 | 282.12 | -3.296 |
| -10.73251 | 283.23 | -2.588 | 282.29 | -3.296 |

|           |        |        |        |        |
|-----------|--------|--------|--------|--------|
| -10.6439  | 283.4  | -2.6   | 282.46 | -3.297 |
| -10.47558 | 283.57 | -2.611 | 282.63 | -3.298 |
| -10.37676 | 283.74 | -2.623 | 282.8  | -3.298 |
| -10.27988 | 283.91 | -2.637 | 282.97 | -3.299 |
| -10.29746 | 284.08 | -2.644 | 283.14 | -3.3   |
| -10.27165 | 284.24 | -2.654 | 283.3  | -3.3   |
| -10.25342 | 284.41 | -2.662 | 283.47 | -3.301 |
| -10.14344 | 284.58 | -2.675 | 283.64 | -3.301 |
| -9.93901  | 284.75 | -2.683 | 283.81 | -3.302 |
| -9.83135  | 284.92 | -2.691 | 283.98 | -3.303 |
| -9.66178  | 285.09 | -2.698 | 284.15 | -3.303 |
| -9.66406  | 285.26 | -2.707 | 284.32 | -3.303 |
| -9.65912  | 285.43 | -2.717 | 284.49 | -3.303 |
| -9.63736  | 285.59 | -2.728 | 284.66 | -3.303 |
| -9.57132  | 285.76 | -2.74  | 284.83 | -3.302 |
| -9.41743  | 285.93 | -2.747 | 285    | -3.301 |
| -9.3761   | 286.1  | -2.754 | 285.17 | -3.3   |
| -9.45282  | 286.27 | -2.762 | 285.33 | -3.299 |
| -9.45293  | 286.44 | -2.769 | 285.5  | -3.298 |
| -9.36646  | 286.61 | -2.779 | 285.67 | -3.296 |
| -9.10937  | 286.78 | -2.785 | 285.84 | -3.294 |
| -9.04331  | 286.94 | -2.79  | 286.01 | -3.291 |
| -9.08316  | 287.11 | -2.79  | 286.18 | -3.288 |
| -8.9877   | 287.28 | -2.794 | 286.35 | -3.285 |
| -8.9308   | 287.45 | -2.802 | 286.52 | -3.281 |
| -8.80513  | 287.62 | -2.811 | 286.69 | -3.277 |
| -8.73544  | 287.79 | -2.816 | 286.86 | -3.272 |
| -8.49137  | 287.96 | -2.821 | 287.03 | -3.267 |
| -8.41071  | 288.13 | -2.823 | 287.19 | -3.262 |
| -8.39386  | 288.3  | -2.827 | 287.36 | -3.256 |
| -8.40455  | 288.46 | -2.828 | 287.53 | -3.249 |
| -8.34792  | 288.63 | -2.827 | 287.7  | -3.243 |
| -8.23656  | 288.8  | -2.826 | 287.87 | -3.236 |
| -8.23116  | 288.97 | -2.829 | 288.04 | -3.228 |
| -8.09503  | 289.14 | -2.835 | 288.21 | -3.22  |
| -7.99076  | 289.31 | -2.839 | 288.38 | -3.212 |
| -7.9722   | 289.48 | -2.842 | 288.55 | -3.204 |
| -7.86173  | 289.65 | -2.843 | 288.72 | -3.195 |
| -7.84488  | 289.82 | -2.849 | 288.89 | -3.186 |
| -7.62038  | 289.99 | -2.849 | 289.06 | -3.177 |
| -7.53994  | 290.15 | -2.852 | 289.23 | -3.168 |
| -7.40365  | 290.32 | -2.847 | 289.4  | -3.158 |
| -7.38486  | 290.49 | -2.848 | 289.56 | -3.149 |
| -7.32962  | 290.66 | -2.845 | 289.73 | -3.139 |
| -7.23753  | 290.83 | -2.845 | 289.9  | -3.129 |
| -7.05879  | 291    | -2.843 | 290.07 | -3.119 |
| -6.91109  | 291.17 | -2.841 | 290.24 | -3.109 |
| -6.86968  | 291.34 | -2.839 | 290.41 | -3.099 |
| -6.94962  | 291.51 | -2.831 | 290.58 | -3.089 |
| -6.89231  | 291.68 | -2.828 | 290.75 | -3.079 |
| -6.80793  | 291.84 | -2.824 | 290.92 | -3.068 |
| -6.59782  | 292.01 | -2.827 | 291.09 | -3.058 |
| -6.52002  | 292.18 | -2.825 | 291.26 | -3.047 |
| -6.39078  | 292.35 | -2.821 | 291.43 | -3.036 |

|          |        |        |        |        |
|----------|--------|--------|--------|--------|
| -6.30891 | 292.52 | -2.812 | 291.6  | -3.026 |
| -6.29355 | 292.69 | -2.806 | 291.77 | -3.015 |
| -6.16829 | 292.86 | -2.797 | 291.93 | -3.004 |
| -6.0453  | 293.03 | -2.791 | 292.1  | -2.993 |
| -5.85103 | 293.2  | -2.78  | 292.27 | -2.983 |
| -5.81809 | 293.37 | -2.772 | 292.44 | -2.972 |
| -5.81743 | 293.54 | -2.766 | 292.61 | -2.962 |
| -5.76825 | 293.71 | -2.764 | 292.78 | -2.951 |
| -5.67668 | 293.87 | -2.759 | 292.95 | -2.94  |
| -5.51718 | 294.04 | -2.753 | 293.12 | -2.93  |
| -5.49284 | 294.21 | -2.746 | 293.29 | -2.919 |
| -5.27993 | 294.38 | -2.738 | 293.46 | -2.909 |
| -5.20196 | 294.55 | -2.731 | 293.63 | -2.898 |
| -5.16502 | 294.72 | -2.721 | 293.8  | -2.888 |
| -5.11881 | 294.89 | -2.712 | 293.97 | -2.878 |
| -4.92074 | 295.06 | -2.699 | 294.14 | -2.867 |
| -4.7193  | 295.23 | -2.687 | 294.31 | -2.857 |
| -4.65034 | 295.4  | -2.677 | 294.48 | -2.846 |
| -4.70573 | 295.57 | -2.669 | 294.65 | -2.836 |
| -4.66619 | 295.74 | -2.663 | 294.81 | -2.825 |
| -4.67367 | 295.9  | -2.658 | 294.98 | -2.815 |
| -4.51866 | 296.07 | -2.653 | 295.15 | -2.804 |
| -4.33126 | 296.24 | -2.645 | 295.32 | -2.794 |
| -4.15928 | 296.41 | -2.633 | 295.49 | -2.783 |
| -4.07779 | 296.58 | -2.621 | 295.66 | -2.772 |
| -4.08614 | 296.75 | -2.614 | 295.83 | -2.761 |
| -4.0662  | 296.92 | -2.606 | 296    | -2.75  |
| -4.03237 | 297.09 | -2.595 | 296.17 | -2.739 |
| -3.79141 | 297.26 | -2.587 | 296.34 | -2.728 |
| -3.7474  | 297.43 | -2.582 | 296.51 | -2.717 |
| -3.62141 | 297.6  | -2.58  | 296.68 | -2.706 |
| -3.7317  | 297.77 | -2.566 | 296.85 | -2.695 |
| -3.60351 | 297.94 | -2.552 | 297.02 | -2.683 |
| -3.60059 | 298.1  | -2.537 | 297.19 | -2.672 |
| -3.35113 | 298.27 | -2.532 | 297.36 | -2.661 |
| -3.21541 | 298.44 | -2.524 | 297.53 | -2.649 |
| -3.05146 | 298.61 | -2.511 | 297.7  | -2.638 |
| -3.03929 | 298.78 | -2.492 | 297.87 | -2.627 |
| -3.02198 | 298.95 | -2.479 | 298.04 | -2.615 |
| -3.03367 | 299.12 | -2.468 | 298.21 | -2.604 |
| -3.02027 | 299.29 | -2.462 | 298.38 | -2.593 |
| -2.94662 | 299.46 | -2.453 | 298.55 | -2.582 |
| -2.82771 | 299.63 | -2.441 | 298.72 | -2.571 |
| -2.78654 | 299.8  | -2.429 | 298.88 | -2.56  |
| -2.70908 | 299.97 | -2.418 | 299.05 | -2.549 |
| -2.7245  | 300.14 | -2.416 | 299.22 | -2.538 |
| -2.5187  | 300.31 | -2.409 | 299.39 | -2.527 |
| -2.53436 | 300.48 | -2.397 | 299.56 | -2.516 |
| -2.31357 | 300.65 | -2.379 | 299.73 | -2.506 |
| -2.40953 | 300.81 | -2.366 | 299.9  | -2.495 |
| -2.2479  | 300.98 | -2.357 | 300.07 | -2.485 |
| -2.31869 | 301.15 | -2.352 | 300.24 | -2.474 |
| -2.25276 | 301.32 | -2.338 | 300.41 | -2.464 |
| -2.2471  | 301.49 | -2.328 | 300.58 | -2.454 |

|          |        |        |        |        |
|----------|--------|--------|--------|--------|
| -2.13658 | 301.66 | -2.314 | 300.75 | -2.443 |
| -1.98763 | 301.83 | -2.313 | 300.92 | -2.433 |
| -2.03558 | 302    | -2.305 | 301.09 | -2.424 |
| -2.03362 | 302.17 | -2.295 | 301.26 | -2.414 |
| -2.12774 | 302.34 | -2.277 | 301.43 | -2.405 |
| -1.97302 | 302.51 | -2.262 | 301.6  | -2.395 |
| -1.92076 | 302.68 | -2.253 | 301.77 | -2.386 |
| -1.74967 | 302.85 | -2.242 | 301.94 | -2.378 |
| -1.77001 | 303.02 | -2.229 | 302.11 | -2.369 |
| -1.70636 | 303.19 | -2.211 | 302.28 | -2.36  |
| -1.60946 | 303.36 | -2.202 | 302.45 | -2.351 |
| -1.58498 | 303.53 | -2.199 | 302.62 | -2.343 |
| -1.57862 | 303.7  | -2.202 | 302.79 | -2.334 |
| -1.69253 | 303.87 | -2.192 | 302.96 | -2.326 |
| -1.59197 | 304.04 | -2.177 | 303.13 | -2.317 |
| -1.57341 | 304.21 | -2.16  | 303.3  | -2.309 |
| -1.52405 | 304.38 | -2.152 | 303.47 | -2.3   |
| -1.47696 | 304.55 | -2.144 | 303.64 | -2.291 |
| -1.37972 | 304.72 | -2.13  | 303.81 | -2.283 |
| -1.28849 | 304.89 | -2.115 | 303.98 | -2.274 |
| -1.25577 | 305.06 | -2.105 | 304.15 | -2.265 |
| -1.25984 | 305.22 | -2.101 | 304.32 | -2.256 |
| -1.31083 | 305.39 | -2.091 | 304.49 | -2.247 |
| -1.37757 | 305.56 | -2.078 | 304.66 | -2.238 |
| -1.35369 | 305.73 | -2.066 | 304.83 | -2.229 |
| -1.30454 | 305.9  | -2.059 | 305    | -2.22  |
| -1.17151 | 306.07 | -2.049 | 305.17 | -2.211 |
| -1.10124 | 306.24 | -2.038 | 305.34 | -2.202 |
| -1.00054 | 306.41 | -2.027 | 305.51 | -2.193 |
| -0.98924 | 306.58 | -2.018 | 305.68 | -2.184 |
| -1.17979 | 306.75 | -2.009 | 305.85 | -2.175 |
| -1.30089 | 306.92 | -1.995 | 306.02 | -2.166 |
| -1.30882 | 307.09 | -1.982 | 306.19 | -2.158 |
| -1.06694 | 307.26 | -1.971 | 306.36 | -2.149 |
| -0.95613 | 307.43 | -1.968 | 306.53 | -2.141 |
| -0.91379 | 307.6  | -1.963 | 306.7  | -2.132 |
| -0.99063 | 307.77 | -1.957 | 306.87 | -2.124 |
| -1.02407 | 307.94 | -1.948 | 307.04 | -2.115 |
| -1.00101 | 308.11 | -1.939 | 307.21 | -2.107 |
| -1.01835 | 308.28 | -1.929 | 307.38 | -2.099 |
| -1.00493 | 308.45 | -1.917 | 307.55 | -2.09  |
| -0.96922 | 308.62 | -1.909 | 307.72 | -2.082 |
| -0.81942 | 308.79 | -1.898 | 307.89 | -2.074 |
| -0.81151 | 308.96 | -1.89  | 308.06 | -2.066 |
| -0.81579 | 309.13 | -1.88  | 308.23 | -2.058 |
| -0.87046 | 309.3  | -1.874 | 308.4  | -2.049 |
| -0.85538 | 309.47 | -1.868 | 308.57 | -2.041 |
| -0.86694 | 309.64 | -1.86  | 308.74 | -2.032 |
| -0.81284 | 309.81 | -1.849 | 308.91 | -2.024 |
| -0.7758  | 309.98 | -1.841 | 309.08 | -2.015 |
| -0.78842 | 310.15 | -1.834 | 309.25 | -2.007 |
| -0.86182 | 310.32 | -1.831 | 309.42 | -1.998 |
| -0.78449 | 310.49 | -1.817 | 309.59 | -1.989 |
| -0.73096 | 310.66 | -1.808 | 309.76 | -1.98  |

|          |        |        |        |        |
|----------|--------|--------|--------|--------|
| -0.65769 | 310.83 | -1.797 | 309.93 | -1.971 |
| -0.70364 | 311    | -1.794 | 310.1  | -1.962 |
| -0.69453 | 311.17 | -1.787 | 310.27 | -1.953 |
| -0.75564 | 311.34 | -1.777 | 310.44 | -1.944 |
| -0.74846 | 311.51 | -1.768 | 310.61 | -1.935 |
| -0.75957 | 311.68 | -1.762 | 310.78 | -1.926 |
| -0.77794 | 311.85 | -1.759 | 310.95 | -1.917 |
| -0.80142 | 312.02 | -1.751 | 311.12 | -1.908 |
| -0.74543 | 312.19 | -1.738 | 311.29 | -1.899 |
| -0.6444  | 312.36 | -1.723 | 311.46 | -1.89  |
| -0.59873 | 312.53 | -1.714 | 311.63 | -1.881 |
| -0.60687 | 312.7  | -1.709 | 311.8  | -1.871 |
| -0.6405  | 312.87 | -1.706 | 311.97 | -1.862 |
| -0.62464 | 313.04 | -1.7   | 312.14 | -1.853 |
| -0.61127 | 313.21 | -1.692 | 312.31 | -1.844 |
| -0.59448 | 313.38 | -1.687 | 312.48 | -1.835 |
| -0.6319  | 313.55 | -1.682 | 312.65 | -1.825 |
| -0.6838  | 313.72 | -1.677 | 312.82 | -1.816 |
| -0.62503 | 313.89 | -1.667 | 312.99 | -1.807 |
| -0.56594 | 314.06 | -1.663 | 313.16 | -1.798 |
| -0.51915 | 314.23 | -1.659 | 313.33 | -1.789 |
| -0.57493 | 314.4  | -1.658 | 313.5  | -1.781 |
| -0.56015 | 314.57 | -1.649 | 313.67 | -1.772 |
| -0.56237 | 314.74 | -1.644 | 313.84 | -1.764 |
| -0.53565 | 314.91 | -1.636 | 314.01 | -1.755 |
| -0.53307 | 315.08 | -1.635 | 314.18 | -1.747 |
| -0.51593 | 315.25 | -1.629 | 314.35 | -1.739 |
| -0.52094 | 315.42 | -1.624 | 314.52 | -1.731 |
| -0.57657 | 315.6  | -1.616 | 314.69 | -1.723 |
| -0.64807 | 315.77 | -1.609 | 314.86 | -1.715 |
| -0.61943 | 315.94 | -1.603 | 315.03 | -1.707 |
| -0.51688 | 316.11 | -1.598 | 315.2  | -1.7   |
| -0.46808 | 316.28 | -1.592 | 315.38 | -1.692 |
| -0.47198 | 316.45 | -1.585 | 315.55 | -1.684 |
| -0.52105 | 316.62 | -1.578 | 315.72 | -1.677 |
| -0.50643 | 316.79 | -1.572 | 315.89 | -1.669 |
| -0.53389 | 316.96 | -1.566 | 316.06 | -1.662 |
| -0.5202  | 317.13 | -1.562 | 316.23 | -1.654 |
| -0.52362 | 317.3  | -1.556 | 316.4  | -1.647 |
| -0.51062 | 317.47 | -1.55  | 316.57 | -1.639 |
| -0.52595 | 317.64 | -1.541 | 316.74 | -1.631 |
| -0.49822 | 317.81 | -1.535 | 316.91 | -1.623 |
| -0.4367  | 317.98 | -1.531 | 317.08 | -1.615 |
| -0.40658 | 318.15 | -1.528 | 317.25 | -1.607 |
| -0.37365 | 318.32 | -1.526 | 317.42 | -1.599 |
| -0.41975 | 318.49 | -1.523 | 317.59 | -1.591 |
| -0.4675  | 318.66 | -1.52  | 317.76 | -1.583 |
| -0.51778 | 318.83 | -1.514 | 317.93 | -1.574 |
| -0.51284 | 319    | -1.508 | 318.1  | -1.566 |
| -0.43865 | 319.17 | -1.506 | 318.27 | -1.557 |
| -0.43145 | 319.35 | -1.502 | 318.44 | -1.549 |
| -0.42678 | 319.52 | -1.501 | 318.61 | -1.54  |
| -0.45858 | 319.69 | -1.497 | 318.78 | -1.532 |
| -0.46267 | 319.86 | -1.495 | 318.96 | -1.524 |

|          |        |        |        |        |
|----------|--------|--------|--------|--------|
| -0.46886 | 320.03 | -1.493 | 319.13 | -1.516 |
| -0.50508 | 320.2  | -1.49  | 319.3  | -1.508 |
| -0.48901 | 320.37 | -1.483 | 319.47 | -1.5   |
| -0.48475 | 320.54 | -1.475 | 319.64 | -1.492 |
| -0.4379  | 320.71 | -1.471 | 319.81 | -1.484 |
| -0.46084 | 320.88 | -1.473 | 319.98 | -1.476 |
| -0.46867 | 321.05 | -1.473 | 320.15 | -1.469 |
| -0.46719 | 321.22 | -1.471 | 320.32 | -1.461 |
| -0.4532  | 321.39 | -1.467 | 320.49 | -1.454 |
| -0.4448  | 321.56 | -1.462 | 320.66 | -1.446 |
| -0.43004 | 321.73 | -1.459 | 320.83 | -1.439 |
| -0.40153 | 321.91 | -1.457 | 321    | -1.432 |
| -0.38126 | 322.08 | -1.453 | 321.17 | -1.424 |
| -0.38444 | 322.25 | -1.446 | 321.34 | -1.417 |
| -0.40192 | 322.42 | -1.44  | 321.51 | -1.41  |
| -0.42463 | 322.59 | -1.438 | 321.68 | -1.403 |
| -0.45788 | 322.76 | -1.437 | 321.85 | -1.396 |
| -0.47736 | 322.93 | -1.431 | 322.03 | -1.389 |
| -0.42422 | 323.1  | -1.42  | 322.2  | -1.382 |
| -0.35546 | 323.27 | -1.415 | 322.37 | -1.375 |
| -0.29194 | 323.44 | -1.412 | 322.54 | -1.369 |
| -0.3567  | 323.61 | -1.413 | 322.71 | -1.362 |
| -0.42362 | 323.78 | -1.408 | 322.88 | -1.355 |
| -0.46887 | 323.95 | -1.405 | 323.05 | -1.348 |
| -0.43723 | 324.12 | -1.401 | 323.22 | -1.342 |
| -0.36797 | 324.3  | -1.401 | 323.39 | -1.335 |
| -0.35443 | 324.47 | -1.401 | 323.56 | -1.329 |
| -0.32825 | 324.64 | -1.401 | 323.73 | -1.323 |
| -0.33158 | 324.81 | -1.397 | 323.9  | -1.316 |
| -0.31407 | 324.98 | -1.394 | 324.07 | -1.31  |
| -0.32318 | 325.15 | -1.392 | 324.25 | -1.304 |
| -0.37524 | 325.32 | -1.394 | 324.42 | -1.297 |
| -0.39145 | 325.49 | -1.39  | 324.59 | -1.291 |
| -0.38288 | 325.66 | -1.387 | 324.76 | -1.284 |
| -0.36152 | 325.83 | -1.382 | 324.93 | -1.278 |
| -0.34193 | 326    | -1.381 | 325.1  | -1.271 |
| -0.35896 | 326.17 | -1.381 | 325.27 | -1.265 |
| -0.33754 | 326.35 | -1.38  | 325.44 | -1.258 |
| -0.31113 | 326.52 | -1.376 | 325.61 | -1.252 |
| -0.32246 | 326.69 | -1.368 | 325.78 | -1.245 |
| -0.37716 | 326.86 | -1.362 | 325.95 | -1.238 |
| -0.44874 | 327.03 | -1.358 | 326.13 | -1.232 |
| -0.41263 | 327.2  | -1.359 | 326.3  | -1.226 |
| -0.40414 | 327.37 | -1.357 | 326.47 | -1.22  |
| -0.38129 | 327.54 | -1.354 | 326.64 | -1.214 |
| -0.41416 | 327.71 | -1.352 | 326.81 | -1.208 |
| -0.36773 | 327.88 | -1.352 | 326.98 | -1.202 |
| -0.35043 | 328.06 | -1.351 | 327.15 | -1.196 |
| -0.3128  | 328.23 | -1.348 | 327.32 | -1.19  |
| -0.3728  | 328.4  | -1.34  | 327.49 | -1.184 |
| -0.41344 | 328.57 | -1.332 | 327.66 | -1.178 |
| -0.40702 | 328.74 | -1.329 | 327.83 | -1.172 |
| -0.32862 | 328.91 | -1.328 | 328.01 | -1.167 |
| -0.29242 | 329.08 | -1.33  | 328.18 | -1.161 |

|          |        |        |        |        |
|----------|--------|--------|--------|--------|
| -0.34811 | 329.25 | -1.33  | 328.35 | -1.155 |
| -0.40807 | 329.42 | -1.327 | 328.52 | -1.15  |
| -0.41727 | 329.59 | -1.324 | 328.69 | -1.144 |
| -0.36973 | 329.76 | -1.322 | 328.86 | -1.139 |
| -0.32226 | 329.93 | -1.321 | 329.03 | -1.133 |
| -0.2943  | 330.1  | -1.318 | 329.2  | -1.128 |
| -0.28718 | 330.28 | -1.314 | 329.37 | -1.123 |
| -0.32229 | 330.45 | -1.31  | 329.54 | -1.118 |
| -0.33186 | 330.62 | -1.307 | 329.71 | -1.113 |
| -0.38757 | 330.79 | -1.3   | 329.88 | -1.107 |
| -0.41191 | 330.96 | -1.296 | 330.05 | -1.102 |
| -0.48762 | 331.13 | -1.294 | 330.22 | -1.097 |
| -0.47811 | 331.3  | -1.293 | 330.39 | -1.092 |
| -0.43928 | 331.47 | -1.292 | 330.56 | -1.087 |
| -0.34834 | 331.64 | -1.293 | 330.73 | -1.082 |
| -0.30978 | 331.81 | -1.296 | 330.9  | -1.077 |
| -0.27326 | 331.98 | -1.297 | 331.07 | -1.072 |
| -0.27649 | 332.15 | -1.293 | 331.24 | -1.067 |
| -0.29571 | 332.32 | -1.289 | 331.41 | -1.062 |
| -0.33834 | 332.49 | -1.285 | 331.59 | -1.057 |
| -0.36697 | 332.66 | -1.281 | 331.76 | -1.053 |
| -0.38221 | 332.83 | -1.277 | 331.93 | -1.048 |
| -0.38336 | 333    | -1.274 | 332.1  | -1.044 |
| -0.35148 | 333.17 | -1.274 | 332.27 | -1.039 |
| -0.3105  | 333.34 | -1.275 | 332.44 | -1.035 |
| -0.29162 | 333.51 | -1.275 | 332.61 | -1.031 |
| -0.3357  | 333.69 | -1.273 | 332.78 | -1.027 |
| -0.36894 | 333.86 | -1.27  | 332.95 | -1.023 |
| -0.37876 | 334.03 | -1.264 | 333.12 | -1.019 |
| -0.33231 | 334.2  | -1.261 | 333.29 | -1.015 |
| -0.29546 | 334.37 | -1.259 | 333.46 | -1.011 |
| -0.2944  | 334.54 | -1.258 | 333.63 | -1.008 |
| -0.30207 | 334.71 | -1.256 | 333.8  | -1.004 |
| -0.34618 | 334.88 | -1.252 | 333.97 | -1     |
| -0.36218 | 335.05 | -1.249 | 334.14 | -0.997 |
| -0.347   | 335.22 | -1.248 | 334.31 | -0.993 |
| -0.34617 | 335.39 | -1.25  | 334.48 | -0.989 |
| -0.30913 | 335.56 | -1.249 | 334.65 | -0.985 |
| -0.36923 | 335.73 | -1.244 | 334.82 | -0.982 |
| -0.35261 | 335.9  | -1.237 | 334.99 | -0.978 |
| -0.38021 | 336.07 | -1.231 | 335.16 | -0.975 |
| -0.33232 | 336.24 | -1.225 | 335.33 | -0.972 |
| -0.32229 | 336.41 | -1.221 | 335.5  | -0.969 |
| -0.32763 | 336.58 | -1.218 | 335.67 | -0.966 |
| -0.34526 | 336.75 | -1.218 | 335.84 | -0.963 |
| -0.34024 | 336.92 | -1.22  | 336.01 | -0.961 |
| -0.3411  | 337.09 | -1.223 | 336.18 | -0.958 |
| -0.37145 | 337.26 | -1.224 | 336.35 | -0.956 |
| -0.43309 | 337.43 | -1.223 | 336.52 | -0.953 |
| -0.44352 | 337.6  | -1.22  | 336.69 | -0.951 |
| -0.41614 | 337.77 | -1.218 | 336.86 | -0.949 |
| -0.36068 | 337.94 | -1.217 | 337.03 | -0.947 |
| -0.34875 | 338.11 | -1.218 | 337.21 | -0.944 |
| -0.32698 | 338.29 | -1.217 | 337.38 | -0.942 |

|          |        |        |        |        |
|----------|--------|--------|--------|--------|
| -0.32289 | 338.46 | -1.215 | 337.55 | -0.94  |
| -0.33464 | 338.63 | -1.213 | 337.72 | -0.939 |
| -0.37465 | 338.8  | -1.213 | 337.89 | -0.937 |
| -0.4049  | 338.97 | -1.211 | 338.06 | -0.935 |
| -0.40801 | 339.14 | -1.211 | 338.23 | -0.933 |
| -0.38615 | 339.31 | -1.207 | 338.4  | -0.932 |
| -0.32734 | 339.48 | -1.209 | 338.57 | -0.93  |
| -0.2578  | 339.65 | -1.21  | 338.74 | -0.929 |
| -0.20062 | 339.82 | -1.21  | 338.91 | -0.928 |
| -0.23598 | 339.99 | -1.206 | 339.08 | -0.926 |
| -0.27673 | 340.16 | -1.202 | 339.25 | -0.925 |
| -0.32678 | 340.33 | -1.2   | 339.42 | -0.924 |
| -0.2975  | 340.5  | -1.199 | 339.59 | -0.922 |
| -0.3063  | 340.67 | -1.193 | 339.76 | -0.921 |
| -0.31448 | 340.84 | -1.188 | 339.93 | -0.919 |
| -0.3464  | 341.01 | -1.183 | 340.1  | -0.918 |
| -0.37731 | 341.18 | -1.184 | 340.27 | -0.916 |
| -0.36666 | 341.35 | -1.186 | 340.44 | -0.914 |
| -0.38596 | 341.52 | -1.187 | 340.61 | -0.913 |
| -0.36514 | 341.69 | -1.186 | 340.78 | -0.911 |
| -0.35522 | 341.86 | -1.181 | 340.95 | -0.909 |
| -0.3149  | 342.03 | -1.175 | 341.12 | -0.907 |
| -0.30751 | 342.2  | -1.169 | 341.29 | -0.905 |
| -0.28967 | 342.37 | -1.166 | 341.47 | -0.903 |
| -0.28728 | 342.54 | -1.166 | 341.64 | -0.901 |
| -0.30015 | 342.71 | -1.169 | 341.81 | -0.899 |
| -0.34073 | 342.88 | -1.172 | 341.98 | -0.897 |
| -0.37265 | 343.05 | -1.173 | 342.15 | -0.895 |
| -0.36956 | 343.23 | -1.174 | 342.32 | -0.893 |
| -0.36571 | 343.4  | -1.174 | 342.49 | -0.891 |
| -0.36963 | 343.57 | -1.174 | 342.66 | -0.89  |
| -0.35273 | 343.74 | -1.176 | 342.83 | -0.888 |
| -0.35046 | 343.91 | -1.177 | 343    | -0.886 |
| -0.31213 | 344.08 | -1.178 | 343.17 | -0.885 |
| -0.30368 | 344.25 | -1.179 | 343.34 | -0.883 |
| -0.29167 | 344.42 | -1.18  | 343.51 | -0.882 |
| -0.33767 | 344.59 | -1.183 | 343.68 | -0.881 |
| -0.35375 | 344.76 | -1.185 | 343.85 | -0.88  |
| -0.36716 | 344.93 | -1.186 | 344.02 | -0.879 |
| -0.32861 | 345.1  | -1.189 | 344.19 | -0.878 |
| -0.28876 | 345.27 | -1.19  | 344.36 | -0.877 |
| -0.30293 | 345.44 | -1.191 | 344.54 | -0.876 |
| -0.3293  | 345.61 | -1.189 | 344.71 | -0.875 |
| -0.35732 | 345.78 | -1.187 | 344.88 | -0.874 |
| -0.32109 | 345.95 | -1.186 | 345.05 | -0.873 |
| -0.29026 | 346.12 | -1.185 | 345.22 | -0.873 |
| -0.28049 | 346.29 | -1.188 | 345.39 | -0.872 |
| -0.34038 | 346.46 | -1.192 | 345.56 | -0.872 |
| -0.33315 | 346.63 | -1.193 | 345.73 | -0.871 |
| -0.30388 | 346.8  | -1.189 | 345.9  | -0.871 |
| -0.26905 | 346.97 | -1.183 | 346.07 | -0.87  |
| -0.26219 | 347.15 | -1.179 | 346.24 | -0.87  |
| -0.33645 | 347.32 | -1.179 | 346.41 | -0.87  |
| -0.37249 | 347.49 | -1.178 | 346.58 | -0.869 |



|          |        |        |        |        |
|----------|--------|--------|--------|--------|
| -0.43767 | 347.66 | -1.178 | 346.75 | -0.869 |
| -0.42143 | 347.83 | -1.177 | 346.92 | -0.868 |
| -0.3672  | 348    | -1.179 | 347.09 | -0.867 |
| -0.31993 | 348.17 | -1.181 | 347.27 | -0.867 |
| -0.30461 | 348.34 | -1.185 | 347.44 | -0.866 |
| -0.31265 | 348.51 | -1.187 | 347.61 | -0.865 |
| -0.34039 | 348.68 | -1.19  | 347.78 | -0.864 |
| -0.33063 | 348.85 | -1.191 | 347.95 | -0.863 |
| -0.3591  | 349.02 | -1.192 | 348.12 | -0.863 |
| -0.36915 | 349.19 | -1.192 | 348.29 | -0.862 |
| -0.35894 | 349.36 | -1.194 | 348.46 | -0.861 |
| -0.32175 | 349.53 | -1.199 | 348.63 | -0.86  |
| -0.28242 | 349.7  | -1.204 | 348.8  | -0.859 |
| -0.31522 | 349.88 | -1.207 | 348.97 | -0.858 |
| -0.34376 | 350.05 | -1.205 | 349.14 | -0.857 |
| -0.34608 | 350.22 | -1.204 | 349.31 | -0.855 |
| -0.31278 | 350.39 | -1.204 | 349.48 | -0.854 |
| -0.28734 | 350.56 | -1.209 | 349.65 | -0.853 |
| -0.2809  | 350.73 | -1.211 | 349.82 | -0.852 |
| -0.32594 | 350.9  | -1.213 | 350    | -0.85  |
| -0.37314 | 351.07 | -1.212 | 350.17 | -0.849 |
| -0.40916 | 351.24 | -1.212 | 350.34 | -0.848 |
| -0.38667 | 351.41 | -1.213 | 350.51 | -0.847 |
| -0.33132 | 351.58 | -1.213 | 350.68 | -0.845 |
| -0.30083 | 351.75 | -1.214 | 350.85 | -0.844 |
| -0.28499 | 351.92 | -1.214 | 351.02 | -0.843 |
| -0.2807  | 352.09 | -1.218 | 351.19 | -0.842 |
| -0.25809 | 352.26 | -1.224 | 351.36 | -0.841 |
| -0.25139 | 352.43 | -1.232 | 351.53 | -0.84  |
| -0.28301 | 352.61 | -1.235 | 351.7  | -0.839 |
| -0.31486 | 352.78 | -1.235 | 351.87 | -0.838 |
| -0.3594  | 352.95 | -1.232 | 352.04 | -0.837 |
| -0.34582 | 353.12 | -1.231 | 352.21 | -0.836 |
| -0.35798 | 353.29 | -1.232 | 352.39 | -0.836 |
| -0.33182 | 353.46 | -1.236 | 352.56 | -0.835 |
| -0.335   | 353.63 | -1.239 | 352.73 | -0.835 |
| -0.30652 | 353.8  | -1.24  | 352.9  | -0.835 |
| -0.29515 | 353.97 | -1.242 | 353.07 | -0.834 |
| -0.3051  | 354.14 | -1.244 | 353.24 | -0.834 |
| -0.34263 | 354.31 | -1.247 | 353.41 | -0.833 |
| -0.37766 | 354.48 | -1.25  | 353.58 | -0.833 |
| -0.35768 | 354.65 | -1.253 | 353.75 | -0.832 |
| -0.35206 | 354.82 | -1.256 | 353.92 | -0.832 |
| -0.31278 | 354.99 | -1.257 | 354.09 | -0.831 |
| -0.30778 | 355.17 | -1.253 | 354.26 | -0.831 |
| -0.28134 | 355.34 | -1.253 | 354.43 | -0.831 |
| -0.31187 | 355.51 | -1.257 | 354.61 | -0.831 |
| -0.33857 | 355.68 | -1.264 | 354.78 | -0.831 |
| -0.36195 | 355.85 | -1.271 | 354.95 | -0.831 |
| -0.3116  | 356.02 | -1.277 | 355.12 | -0.831 |
| -0.33108 | 356.19 | -1.283 | 355.29 | -0.831 |
| -0.3322  | 356.36 | -1.287 | 355.46 | -0.831 |
| -0.35789 | 356.53 | -1.288 | 355.63 | -0.831 |
| -0.30785 | 356.7  | -1.291 | 355.8  | -0.832 |

|          |        |        |        |        |
|----------|--------|--------|--------|--------|
| -0.27379 | 356.87 | -1.294 | 355.97 | -0.832 |
| -0.29678 | 357.04 | -1.299 | 356.14 | -0.832 |
| -0.32641 | 357.21 | -1.303 | 356.31 | -0.832 |
| -0.34755 | 357.38 | -1.304 | 356.48 | -0.832 |
| -0.34609 | 357.55 | -1.307 | 356.65 | -0.833 |
| -0.31984 | 357.72 | -1.312 | 356.83 | -0.833 |
| -0.33055 | 357.9  | -1.317 | 357    | -0.833 |
| -0.30622 | 358.07 | -1.321 | 357.17 | -0.833 |
| -0.28657 | 358.24 | -1.321 | 357.34 | -0.834 |
| -0.26816 | 358.41 | -1.324 | 357.51 | -0.834 |
| -0.29803 | 358.58 | -1.325 | 357.68 | -0.834 |
| -0.36069 | 358.75 | -1.33  | 357.85 | -0.834 |
| -0.39147 | 358.92 | -1.333 | 358.02 | -0.834 |
| -0.35178 | 359.09 | -1.336 | 358.19 | -0.834 |
| -0.3291  | 359.26 | -1.335 | 358.36 | -0.834 |
| -0.29971 | 359.43 | -1.341 | 358.53 | -0.834 |
| -0.29659 | 359.6  | -1.349 | 358.7  | -0.834 |
| -0.29639 | 359.77 | -1.358 | 358.87 | -0.834 |
| -0.30469 | 359.94 | -1.363 | 359.04 | -0.834 |
| -0.33948 | 360.11 | -1.367 | 359.21 | -0.834 |
| -0.32355 | 360.28 | -1.373 | 359.39 | -0.834 |
| -0.3177  | 360.46 | -1.378 | 359.56 | -0.835 |
| -0.27918 | 360.63 | -1.384 | 359.73 | -0.835 |
| -0.27362 | 360.8  | -1.384 | 359.9  | -0.835 |
| -0.25087 | 360.97 | -1.384 | 360.07 | -0.835 |
| -0.27341 | 361.14 | -1.381 | 360.24 | -0.836 |
| -0.25877 | 361.31 | -1.384 | 360.41 | -0.836 |
| -0.31674 | 361.48 | -1.387 | 360.58 | -0.837 |
| -0.341   | 361.65 | -1.394 | 360.75 | -0.837 |
| -0.36739 | 361.82 | -1.398 | 360.92 | -0.838 |
| -0.36492 | 361.99 | -1.406 | 361.09 | -0.838 |
| -0.31895 | 362.16 | -1.413 | 361.26 | -0.839 |
| -0.29898 | 362.33 | -1.421 | 361.43 | -0.84  |
| -0.26357 | 362.5  | -1.426 | 361.6  | -0.841 |
| -0.27538 | 362.67 | -1.424 | 361.77 | -0.842 |
| -0.28459 | 362.84 | -1.425 | 361.95 | -0.843 |
| -0.30604 | 363.02 | -1.431 | 362.12 | -0.844 |
| -0.30985 | 363.19 | -1.441 | 362.29 | -0.845 |
| -0.28937 | 363.36 | -1.447 | 362.46 | -0.847 |
| -0.27807 | 363.53 | -1.449 | 362.63 | -0.848 |
| -0.27204 | 363.7  | -1.453 | 362.8  | -0.849 |
| -0.27422 | 363.87 | -1.464 | 362.97 | -0.851 |
| -0.25056 | 364.04 | -1.474 | 363.14 | -0.852 |
| -0.26053 | 364.21 | -1.481 | 363.31 | -0.854 |
| -0.3029  | 364.38 | -1.485 | 363.48 | -0.855 |
| -0.34919 | 364.55 | -1.488 | 363.65 | -0.857 |
| -0.35698 | 364.72 | -1.492 | 363.82 | -0.859 |
| -0.36779 | 364.89 | -1.498 | 363.99 | -0.861 |
| -0.3327  | 365.06 | -1.504 | 364.16 | -0.862 |
| -0.34178 | 365.23 | -1.508 | 364.33 | -0.864 |
| -0.3515  | 365.4  | -1.512 | 364.5  | -0.865 |
| -0.37251 | 365.57 | -1.517 | 364.67 | -0.867 |
| -0.377   | 365.75 | -1.523 | 364.84 | -0.869 |
| -0.35158 | 365.92 | -1.524 | 365.01 | -0.87  |

|          |        |        |        |        |
|----------|--------|--------|--------|--------|
| -0.35934 | 366.09 | -1.529 | 365.18 | -0.871 |
| -0.34884 | 366.26 | -1.534 | 365.36 | -0.873 |
| -0.34696 | 366.43 | -1.538 | 365.53 | -0.874 |
| -0.31364 | 366.6  | -1.544 | 365.7  | -0.876 |
| -0.293   | 366.77 | -1.553 | 365.87 | -0.877 |
| -0.26861 | 366.94 | -1.566 | 366.04 | -0.879 |
| -0.25131 | 367.11 | -1.576 | 366.21 | -0.88  |
| -0.24098 | 367.28 | -1.588 | 366.38 | -0.882 |
| -0.24242 | 367.45 | -1.599 | 366.55 | -0.884 |
| -0.28078 | 367.62 | -1.611 | 366.72 | -0.885 |
| -0.30565 | 367.79 | -1.624 | 366.89 | -0.887 |
| -0.31764 | 367.96 | -1.637 | 367.06 | -0.888 |
| -0.31572 | 368.13 | -1.647 | 367.23 | -0.89  |
| -0.35389 | 368.3  | -1.655 | 367.4  | -0.892 |
| -0.35783 | 368.47 | -1.661 | 367.57 | -0.894 |
| -0.37952 | 368.65 | -1.668 | 367.74 | -0.896 |
| -0.36142 | 368.82 | -1.676 | 367.91 | -0.898 |
| -0.35683 | 368.99 | -1.685 | 368.08 | -0.9   |
| -0.30387 | 369.16 | -1.697 | 368.25 | -0.902 |
| -0.27809 | 369.33 | -1.708 | 368.43 | -0.905 |
| -0.28059 | 369.5  | -1.723 | 368.6  | -0.907 |
| -0.32005 | 369.67 | -1.735 | 368.77 | -0.91  |
| -0.32545 | 369.84 | -1.75  | 368.94 | -0.912 |
| -0.3404  | 370.01 | -1.763 | 369.11 | -0.915 |
| -0.34381 | 370.18 | -1.78  | 369.28 | -0.917 |
| -0.3906  | 370.35 | -1.797 | 369.45 | -0.92  |
| -0.37045 | 370.52 | -1.812 | 369.62 | -0.922 |
| -0.35621 | 370.69 | -1.825 | 369.79 | -0.925 |
| -0.31683 | 370.86 | -1.833 | 369.96 | -0.927 |
| -0.30312 | 371.03 | -1.849 | 370.13 | -0.93  |
| -0.30842 | 371.2  | -1.87  | 370.3  | -0.932 |
| -0.28518 | 371.37 | -1.898 | 370.47 | -0.935 |
| -0.29386 | 371.54 | -1.92  | 370.64 | -0.938 |
| -0.27801 | 371.71 | -1.936 | 370.81 | -0.941 |
| -0.28985 | 371.88 | -1.951 | 370.98 | -0.944 |
| -0.33416 | 372.05 | -1.973 | 371.15 | -0.947 |
| -0.37922 | 372.23 | -1.998 | 371.32 | -0.95  |
| -0.40075 | 372.4  | -2.021 | 371.49 | -0.953 |
| -0.36232 | 372.57 | -2.041 | 371.66 | -0.956 |
| -0.31382 | 372.74 | -2.062 | 371.83 | -0.959 |
| -0.30307 | 372.91 | -2.094 | 372    | -0.963 |
| -0.30681 | 373.08 | -2.126 | 372.17 | -0.966 |
| -0.35451 | 373.25 | -2.155 | 372.34 | -0.969 |
| -0.34124 | 373.42 | -2.18  | 372.51 | -0.972 |
| -0.36504 | 373.59 | -2.21  | 372.69 | -0.974 |
| -0.36217 | 373.76 | -2.244 | 372.86 | -0.977 |
| -0.39091 | 373.93 | -2.285 | 373.03 | -0.98  |
| -0.39741 | 374.1  | -2.326 | 373.2  | -0.982 |
| -0.40644 | 374.27 | -2.366 | 373.37 | -0.984 |
| -0.36245 | 374.44 | -2.408 | 373.54 | -0.986 |
| -0.3392  | 374.61 | -2.456 | 373.71 | -0.988 |
| -0.28396 | 374.78 | -2.508 | 373.88 | -0.99  |
| -0.30276 | 374.95 | -2.555 | 374.05 | -0.992 |
| -0.29945 | 375.12 | -2.599 | 374.22 | -0.993 |

|          |        |        |        |        |
|----------|--------|--------|--------|--------|
| -0.32743 | 375.29 | -2.644 | 374.39 | -0.995 |
| -0.32573 | 375.46 | -2.693 | 374.56 | -0.996 |
| -0.36051 | 375.64 | -2.74  | 374.73 | -0.997 |
| -0.34987 | 375.81 | -2.787 | 374.9  | -0.999 |
| -0.35669 | 375.98 | -2.828 | 375.07 | -1     |
| -0.33901 | 376.15 | -2.873 | 375.24 | -1.001 |
| -0.36868 | 376.32 | -2.915 | 375.41 | -1.002 |
| -0.41686 | 376.49 | -2.961 | 375.58 | -1.003 |
| -0.43508 | 376.66 | -3.001 | 375.75 | -1.005 |
| -0.39595 | 376.83 | -3.036 | 375.92 | -1.006 |
| -0.35163 | 377    | -3.07  | 376.09 | -1.007 |
| -0.32035 | 377.17 | -3.102 | 376.26 | -1.009 |
| -0.3374  | 377.34 | -3.136 | 376.43 | -1.011 |
| -0.35114 | 377.51 | -3.165 | 376.6  | -1.013 |
| -0.36393 | 377.68 | -3.19  | 376.78 | -1.015 |
| -0.33806 | 377.85 | -3.208 | 376.95 | -1.017 |
| -0.31753 | 378.02 | -3.224 | 377.12 | -1.019 |
| -0.30958 | 378.19 | -3.237 | 377.29 | -1.021 |
| -0.30886 | 378.36 | -3.249 | 377.46 | -1.023 |
| -0.28855 | 378.53 | -3.257 | 377.63 | -1.025 |
| -0.28301 | 378.7  | -3.261 | 377.8  | -1.027 |
| -0.314   | 378.87 | -3.262 | 377.97 | -1.029 |
| -0.35591 | 379.04 | -3.262 | 378.14 | -1.031 |
| -0.36253 | 379.21 | -3.26  | 378.31 | -1.033 |
| -0.35797 | 379.38 | -3.26  | 378.48 | -1.035 |
| -0.37431 | 379.55 | -3.255 | 378.65 | -1.037 |
| -0.38993 | 379.72 | -3.246 | 378.82 | -1.039 |
| -0.38173 | 379.89 | -3.23  | 378.99 | -1.041 |
| -0.36264 | 380.06 | -3.212 | 379.16 | -1.042 |
| -0.39434 | 380.23 | -3.197 | 379.33 | -1.044 |
| -0.46586 | 380.4  | -3.183 | 379.5  | -1.045 |
| -0.46626 | 380.57 | -3.166 | 379.67 | -1.047 |
| -0.41364 | 380.74 | -3.142 | 379.84 | -1.048 |
| -0.3488  | 380.91 | -3.114 | 380.01 | -1.05  |
| -0.30673 | 381.08 | -3.091 | 380.18 | -1.051 |
| -0.29995 | 381.25 | -3.065 | 380.35 | -1.052 |
| -0.3061  | 381.42 | -3.036 | 380.52 | -1.054 |
| -0.34511 | 381.59 | -2.999 | 380.69 | -1.055 |
| -0.37106 | 381.76 | -2.964 | 380.86 | -1.056 |
| -0.38273 | 381.93 | -2.932 | 381.03 | -1.057 |
| -0.38461 | 382.1  | -2.897 | 381.2  | -1.057 |
| -0.41087 | 382.27 | -2.858 | 381.37 | -1.058 |
| -0.39594 | 382.45 | -2.814 | 381.54 | -1.058 |
| -0.38228 | 382.62 | -2.768 | 381.71 | -1.058 |
| -0.29927 | 382.79 | -2.72  | 381.88 | -1.058 |
| -0.27397 | 382.96 | -2.673 | 382.05 | -1.057 |
| -0.27752 | 383.13 | -2.62  | 382.22 | -1.057 |
| -0.32259 | 383.3  | -2.565 | 382.39 | -1.057 |
| -0.37444 | 383.47 | -2.503 | 382.56 | -1.056 |
| -0.39482 | 383.64 | -2.443 | 382.73 | -1.055 |
| -0.42619 | 383.81 | -2.381 | 382.9  | -1.055 |
| -0.44151 | 383.98 | -2.319 | 383.07 | -1.055 |
| -0.40275 | 384.15 | -2.253 | 383.24 | -1.054 |
| -0.34366 | 384.32 | -2.189 | 383.41 | -1.054 |

|          |        |        |        |        |
|----------|--------|--------|--------|--------|
| -0.29324 | 384.49 | -2.124 | 383.58 | -1.054 |
| -0.32641 | 384.66 | -2.066 | 383.75 | -1.054 |
| -0.39295 | 384.83 | -2.005 | 383.92 | -1.054 |
| -0.41853 | 385    | -1.946 | 384.09 | -1.054 |
| -0.40411 | 385.17 | -1.88  | 384.26 | -1.054 |
| -0.3546  | 385.34 | -1.819 | 384.43 | -1.054 |
| -0.33849 | 385.51 | -1.761 | 384.6  | -1.054 |
| -0.34196 | 385.68 | -1.707 | 384.77 | -1.054 |
| -0.38786 | 385.85 | -1.652 | 384.94 | -1.055 |
| -0.37849 | 386.02 | -1.598 | 385.11 | -1.056 |
| -0.38779 | 386.19 | -1.548 | 385.28 | -1.056 |
| -0.36887 | 386.36 | -1.503 | 385.45 | -1.057 |
| -0.41172 | 386.53 | -1.462 | 385.62 | -1.058 |
| -0.41618 | 386.7  | -1.423 | 385.79 | -1.059 |
| -0.39778 | 386.87 | -1.386 | 385.96 | -1.06  |
| -0.3575  | 387.04 | -1.35  | 386.13 | -1.061 |
| -0.32653 | 387.21 | -1.319 | 386.3  | -1.063 |
| -0.31825 | 387.38 | -1.29  | 386.47 | -1.064 |
| -0.35817 | 387.55 | -1.264 | 386.64 | -1.065 |
| -0.41525 | 387.72 | -1.237 | 386.81 | -1.067 |
| -0.47611 | 387.89 | -1.213 | 386.98 | -1.068 |
| -0.47216 | 388.06 | -1.185 | 387.15 | -1.07  |
| -0.41389 | 388.23 | -1.162 | 387.32 | -1.071 |
| -0.35899 | 388.4  | -1.137 | 387.49 | -1.072 |
| -0.33867 | 388.57 | -1.12  | 387.66 | -1.074 |
| -0.3568  | 388.74 | -1.103 | 387.83 | -1.075 |
| -0.39949 | 388.91 | -1.086 | 388    | -1.076 |
| -0.44416 | 389.08 | -1.068 | 388.17 | -1.077 |
| -0.47456 | 389.25 | -1.05  | 388.34 | -1.079 |
| -0.40234 | 389.42 | -1.04  | 388.51 | -1.08  |
| -0.3492  | 389.59 | -1.03  | 388.68 | -1.08  |
| -0.32246 | 389.76 | -1.015 | 388.85 | -1.081 |
| -0.39771 | 389.92 | -1     | 389.02 | -1.082 |
| -0.43362 | 390.09 | -0.988 | 389.19 | -1.083 |
| -0.45352 | 390.26 | -0.977 | 389.36 | -1.083 |
| -0.42687 | 390.43 | -0.965 | 389.53 | -1.084 |
| -0.37378 | 390.6  | -0.952 | 389.7  | -1.084 |
| -0.31637 | 390.77 | -0.946 | 389.87 | -1.085 |
| -0.32312 | 390.94 | -0.941 | 390.04 | -1.085 |
| -0.37204 | 391.11 | -0.937 | 390.21 | -1.085 |
| -0.47174 | 391.28 | -0.933 | 390.38 | -1.085 |
| -0.45668 | 391.45 | -0.927 | 390.55 | -1.085 |
| -0.46598 | 391.62 | -0.918 | 390.72 | -1.085 |
| -0.41308 | 391.79 | -0.907 | 390.89 | -1.085 |
| -0.4425  | 391.96 | -0.9   | 391.06 | -1.085 |
| -0.46402 | 392.13 | -0.896 | 391.23 | -1.085 |
| -0.45364 | 392.3  | -0.892 | 391.4  | -1.085 |
| -0.42302 | 392.47 | -0.889 | 391.57 | -1.085 |
| -0.37071 | 392.64 | -0.886 | 391.74 | -1.084 |
| -0.38464 | 392.81 | -0.884 | 391.91 | -1.084 |
| -0.43966 | 392.97 | -0.88  | 392.07 | -1.084 |
| -0.45577 | 393.14 | -0.877 | 392.24 | -1.084 |
| -0.45208 | 393.31 | -0.87  | 392.41 | -1.084 |
| -0.41609 | 393.48 | -0.864 | 392.58 | -1.083 |

|          |        |        |        |        |
|----------|--------|--------|--------|--------|
| -0.38692 | 393.65 | -0.859 | 392.75 | -1.083 |
| -0.3928  | 393.82 | -0.858 | 392.92 | -1.083 |
| -0.38781 | 393.99 | -0.855 | 393.09 | -1.082 |
| -0.42182 | 394.16 | -0.854 | 393.26 | -1.081 |
| -0.43293 | 394.33 | -0.854 | 393.43 | -1.081 |
| -0.42404 | 394.5  | -0.856 | 393.6  | -1.08  |
| -0.38535 | 394.67 | -0.858 | 393.77 | -1.08  |
| -0.3609  | 394.84 | -0.855 | 393.94 | -1.079 |
| -0.33799 | 395.01 | -0.85  | 394.11 | -1.079 |
| -0.37297 | 395.18 | -0.845 | 394.28 | -1.078 |
| -0.40358 | 395.35 | -0.844 | 394.45 | -1.077 |
| -0.47806 | 395.52 | -0.845 | 394.62 | -1.077 |
| -0.49178 | 395.68 | -0.844 | 394.79 | -1.076 |
| -0.50279 | 395.85 | -0.841 | 394.96 | -1.075 |
| -0.45367 | 396.02 | -0.837 | 395.13 | -1.075 |
| -0.45467 | 396.19 | -0.832 | 395.3  | -1.075 |
| -0.44902 | 396.36 | -0.83  | 395.47 | -1.074 |
| -0.44511 | 396.53 | -0.828 | 395.64 | -1.074 |
| -0.41799 | 396.7  | -0.829 | 395.81 | -1.074 |
| -0.37529 | 396.87 | -0.831 | 395.98 | -1.074 |
| -0.36266 | 397.04 | -0.834 | 396.15 | -1.074 |
| -0.3841  | 397.21 | -0.835 | 396.31 | -1.074 |
| -0.43263 | 397.38 | -0.834 | 396.48 | -1.074 |
| -0.47117 | 397.55 | -0.831 | 396.65 | -1.074 |
| -0.45475 | 397.72 | -0.828 | 396.82 | -1.074 |
| -0.44624 | 397.89 | -0.826 | 396.99 | -1.074 |
| -0.42334 | 398.05 | -0.825 | 397.16 | -1.074 |
| -0.42502 | 398.22 | -0.825 | 397.33 | -1.074 |
| -0.4221  | 398.39 | -0.828 | 397.5  | -1.074 |
| -0.45138 | 398.56 | -0.831 | 397.67 | -1.074 |
| -0.47954 | 398.73 | -0.834 | 397.84 | -1.075 |
| -0.4678  | 398.9  | -0.836 | 398.01 | -1.075 |
| -0.48568 | 399.07 | -0.84  | 398.18 | -1.075 |
| -0.46933 | 399.24 | -0.842 | 398.35 | -1.076 |
| -0.44144 | 399.41 | -0.841 | 398.52 | -1.077 |
| -0.40042 | 399.58 | -0.841 | 398.69 | -1.078 |
| -0.40322 | 399.75 | -0.842 | 398.86 | -1.079 |
| -0.50438 | 399.92 | -0.845 | 399.03 | -1.08  |
| -0.55735 | 400.09 | -0.848 | 399.2  | -1.081 |
| -0.56031 | 400.25 | -0.85  | 399.37 | -1.082 |
| -0.49288 | 400.42 | -0.852 | 399.54 | -1.083 |
| -0.44184 | 400.59 | -0.851 | 399.71 | -1.084 |
| -0.43971 | 400.76 | -0.855 | 399.88 | -1.085 |
| -0.42509 | 400.93 | -0.859 | 400.04 | -1.086 |
| -0.46553 | 401.1  | -0.865 | 400.21 | -1.088 |
| -0.50917 | 401.27 | -0.867 | 400.38 | -1.089 |
| -0.48419 | 401.44 | -0.868 | 400.55 | -1.09  |
| -0.43684 | 401.61 | -0.87  | 400.72 | -1.092 |
| -0.37461 | 401.78 | -0.875 | 400.89 | -1.093 |
| -0.41074 | 401.95 | -0.878 | 401.06 | -1.094 |
| -0.42575 | 402.12 | -0.879 | 401.23 | -1.096 |
| -0.49005 | 402.28 | -0.879 | 401.4  | -1.097 |
| -0.55467 | 402.45 | -0.882 | 401.57 | -1.099 |
| -0.60202 | 402.62 | -0.886 | 401.74 | -1.1   |

|          |        |        |        |        |
|----------|--------|--------|--------|--------|
| -0.56736 | 402.79 | -0.89  | 401.91 | -1.101 |
| -0.50621 | 402.96 | -0.893 | 402.08 | -1.103 |
| -0.52519 | 403.13 | -0.895 | 402.25 | -1.104 |
| -0.55391 | 403.3  | -0.898 | 402.42 | -1.106 |
| -0.59729 | 403.47 | -0.903 | 402.59 | -1.107 |
| -0.57654 | 403.64 | -0.908 | 402.75 | -1.109 |
| -0.53994 | 403.81 | -0.914 | 402.92 | -1.111 |
| -0.5225  | 403.98 | -0.915 | 403.09 | -1.112 |
| -0.43971 | 404.14 | -0.914 | 403.26 | -1.114 |
| -0.45681 | 404.31 | -0.915 | 403.43 | -1.116 |
| -0.47552 | 404.48 | -0.921 | 403.6  | -1.118 |
| -0.51287 | 404.65 | -0.932 | 403.77 | -1.12  |
| -0.46537 | 404.82 | -0.942 | 403.94 | -1.122 |
| -0.4368  | 404.99 | -0.95  | 404.11 | -1.124 |
| -0.51513 | 405.16 | -0.955 | 404.28 | -1.126 |
| -0.59507 | 405.33 | -0.96  | 404.45 | -1.128 |
| -0.59057 | 405.5  | -0.967 | 404.62 | -1.13  |
| -0.55955 | 405.67 | -0.973 | 404.79 | -1.132 |
| -0.49075 | 405.84 | -0.98  | 404.96 | -1.133 |
| -0.44922 | 406    | -0.986 | 405.13 | -1.135 |
| -0.40924 | 406.17 | -0.995 | 405.29 | -1.137 |
| -0.46526 | 406.34 | -1.005 | 405.46 | -1.139 |
| -0.5348  | 406.51 | -1.015 | 405.63 | -1.14  |
| -0.54996 | 406.68 | -1.023 | 405.8  | -1.142 |
| -0.48763 | 406.85 | -1.029 | 405.97 | -1.144 |
| -0.43341 | 407.02 | -1.035 | 406.14 | -1.145 |
| -0.44725 | 407.19 | -1.041 | 406.31 | -1.147 |
| -0.51647 | 407.36 | -1.048 | 406.48 | -1.148 |
| -0.54436 | 407.52 | -1.056 | 406.65 | -1.15  |
| -0.54686 | 407.69 | -1.065 | 406.82 | -1.151 |
| -0.50086 | 407.86 | -1.073 | 406.99 | -1.153 |
| -0.524   | 408.03 | -1.081 | 407.16 | -1.155 |
| -0.53469 | 408.2  | -1.087 | 407.32 | -1.156 |
| -0.58823 | 408.37 | -1.092 | 407.49 | -1.158 |
| -0.61832 | 408.54 | -1.098 | 407.66 | -1.16  |
| -0.60851 | 408.71 | -1.103 | 407.83 | -1.162 |
| -0.53959 | 408.88 | -1.113 | 408    | -1.164 |
| -0.46414 | 409.05 | -1.123 | 408.17 | -1.166 |
| -0.46047 | 409.21 | -1.134 | 408.34 | -1.168 |
| -0.5299  | 409.38 | -1.141 | 408.51 | -1.171 |
| -0.59314 | 409.55 | -1.146 | 408.68 | -1.173 |
| -0.62564 | 409.72 | -1.151 | 408.85 | -1.176 |
| -0.57679 | 409.89 | -1.16  | 409.02 | -1.178 |
| -0.52642 | 410.06 | -1.167 | 409.19 | -1.181 |
| -0.48004 | 410.23 | -1.173 | 409.36 | -1.185 |
| -0.53897 | 410.4  | -1.176 | 409.53 | -1.188 |
| -0.58925 | 410.57 | -1.186 | 409.7  | -1.192 |
| -0.59848 | 410.74 | -1.2   | 409.86 | -1.196 |
| -0.57589 | 410.9  | -1.213 | 410.03 | -1.201 |
| -0.53341 | 411.07 | -1.221 | 410.2  | -1.206 |
| -0.53798 | 411.24 | -1.227 | 410.37 | -1.211 |
| -0.56688 | 411.41 | -1.234 | 410.54 | -1.216 |
| -0.63859 | 411.58 | -1.241 | 410.71 | -1.222 |
| -0.68094 | 411.75 | -1.248 | 410.88 | -1.228 |

|          |        |        |        |        |
|----------|--------|--------|--------|--------|
| -0.64637 | 411.92 | -1.254 | 411.05 | -1.234 |
| -0.61342 | 412.09 | -1.26  | 411.22 | -1.241 |
| -0.63077 | 412.26 | -1.264 | 411.39 | -1.247 |
| -0.66646 | 412.42 | -1.268 | 411.56 | -1.254 |
| -0.60276 | 412.59 | -1.274 | 411.73 | -1.261 |
| -0.53149 | 412.76 | -1.284 | 411.89 | -1.269 |
| -0.5088  | 412.93 | -1.292 | 412.06 | -1.276 |
| -0.5935  | 413.1  | -1.294 | 412.23 | -1.283 |
| -0.63045 | 413.27 | -1.293 | 412.4  | -1.291 |
| -0.58711 | 413.44 | -1.295 | 412.57 | -1.299 |
| -0.55068 | 413.61 | -1.3   | 412.74 | -1.307 |
| -0.56656 | 413.78 | -1.306 | 412.91 | -1.315 |
| -0.65334 | 413.95 | -1.309 | 413.08 | -1.323 |
| -0.70705 | 414.11 | -1.311 | 413.25 | -1.331 |
| -0.66847 | 414.28 | -1.315 | 413.42 | -1.34  |
| -0.60748 | 414.45 | -1.316 | 413.58 | -1.348 |
| -0.56136 | 414.62 | -1.317 | 413.75 | -1.357 |
| -0.58372 | 414.79 | -1.316 | 413.92 | -1.365 |
| -0.62441 | 414.96 | -1.319 | 414.09 | -1.374 |
| -0.63802 | 415.13 | -1.322 | 414.26 | -1.383 |
| -0.59813 | 415.3  | -1.326 | 414.43 | -1.392 |
| -0.60116 | 415.46 | -1.328 | 414.6  | -1.401 |
| -0.69728 | 415.63 | -1.327 | 414.77 | -1.411 |
| -0.77782 | 415.8  | -1.324 | 414.94 | -1.42  |
| -0.74946 | 415.97 | -1.321 | 415.11 | -1.43  |
| -0.64115 | 416.14 | -1.321 | 415.28 | -1.439 |
| -0.62111 | 416.31 | -1.32  | 415.44 | -1.449 |
| -0.6568  | 416.48 | -1.319 | 415.61 | -1.459 |
| -0.67652 | 416.65 | -1.32  | 415.78 | -1.47  |
| -0.6886  | 416.82 | -1.32  | 415.95 | -1.48  |
| -0.61833 | 416.98 | -1.317 | 416.12 | -1.491 |
| -0.58215 | 417.15 | -1.314 | 416.29 | -1.502 |
| -0.65573 | 417.32 | -1.313 | 416.46 | -1.513 |
| -0.72258 | 417.49 | -1.312 | 416.63 | -1.524 |
| -0.76261 | 417.66 | -1.309 | 416.8  | -1.535 |
| -0.68447 | 417.83 | -1.306 | 416.97 | -1.546 |
| -0.67121 | 418    | -1.303 | 417.13 | -1.557 |
| -0.71596 | 418.17 | -1.302 | 417.3  | -1.568 |
| -0.73586 | 418.33 | -1.302 | 417.47 | -1.579 |
| -0.75409 | 418.5  | -1.303 | 417.64 | -1.59  |
| -0.74115 | 418.67 | -1.304 | 417.81 | -1.6   |
| -0.68018 | 418.84 | -1.305 | 417.98 | -1.611 |
| -0.69824 | 419.01 | -1.305 | 418.15 | -1.621 |
| -0.70226 | 419.18 | -1.3   | 418.32 | -1.631 |
| -0.77202 | 419.35 | -1.294 | 418.49 | -1.641 |
| -0.73503 | 419.51 | -1.293 | 418.65 | -1.65  |
| -0.69946 | 419.68 | -1.294 | 418.82 | -1.659 |
| -0.66637 | 419.85 | -1.295 | 418.99 | -1.667 |
| -0.67055 | 420.02 | -1.292 | 419.16 | -1.675 |
| -0.69927 | 420.19 | -1.289 | 419.33 | -1.683 |
| -0.71282 | 420.36 | -1.285 | 419.5  | -1.69  |
| -0.72226 | 420.53 | -1.283 | 419.67 | -1.697 |
| -0.71326 | 420.7  | -1.282 | 419.84 | -1.703 |
| -0.76311 | 420.86 | -1.287 | 420.01 | -1.709 |



|          |        |        |        |        |
|----------|--------|--------|--------|--------|
| -0.79317 | 421.03 | -1.289 | 420.17 | -1.714 |
| -0.75309 | 421.2  | -1.286 | 420.34 | -1.719 |
| -0.78293 | 421.37 | -1.28  | 420.51 | -1.723 |
| -0.7915  | 421.54 | -1.273 | 420.68 | -1.727 |
| -0.87879 | 421.71 | -1.271 | 420.85 | -1.73  |
| -0.78883 | 421.88 | -1.274 | 421.02 | -1.733 |
| -0.76607 | 422.04 | -1.28  | 421.19 | -1.736 |
| -0.68382 | 422.21 | -1.282 | 421.36 | -1.738 |
| -0.70461 | 422.38 | -1.279 | 421.53 | -1.74  |
| -0.7862  | 422.55 | -1.277 | 421.7  | -1.742 |
| -0.94201 | 422.72 | -1.282 | 421.86 | -1.743 |
| -0.9384  | 422.89 | -1.288 | 422.03 | -1.744 |
| -0.84147 | 423.06 | -1.293 | 422.2  | -1.745 |
| -0.77525 | 423.23 | -1.294 | 422.37 | -1.746 |
| -0.8083  | 423.39 | -1.297 | 422.54 | -1.746 |
| -0.84313 | 423.56 | -1.3   | 422.71 | -1.746 |
| -0.82851 | 423.73 | -1.306 | 422.88 | -1.745 |
| -0.85345 | 423.9  | -1.309 | 423.05 | -1.745 |
| -0.88172 | 424.07 | -1.312 | 423.22 | -1.744 |
| -0.86715 | 424.24 | -1.316 | 423.38 | -1.743 |
| -0.82777 | 424.41 | -1.327 | 423.55 | -1.742 |
| -0.76954 | 424.58 | -1.338 | 423.72 | -1.74  |
| -0.79745 | 424.74 | -1.344 | 423.89 | -1.738 |
| -0.85176 | 424.91 | -1.347 | 424.06 | -1.737 |
| -0.91929 | 425.08 | -1.35  | 424.23 | -1.735 |
| -0.87466 | 425.25 | -1.358 | 424.4  | -1.733 |
| -0.82451 | 425.42 | -1.37  | 424.57 | -1.731 |
| -0.83076 | 425.59 | -1.381 | 424.74 | -1.729 |
| -0.94472 | 425.75 | -1.388 | 424.9  | -1.727 |
| -1.01486 | 425.92 | -1.393 | 425.07 | -1.725 |
| -1.00226 | 426.09 | -1.4   | 425.24 | -1.723 |
| -0.94544 | 426.26 | -1.41  | 425.41 | -1.721 |
| -0.8954  | 426.43 | -1.417 | 425.58 | -1.719 |
| -0.84583 | 426.6  | -1.419 | 425.75 | -1.717 |
| -0.90983 | 426.77 | -1.423 | 425.92 | -1.715 |
| -0.93228 | 426.94 | -1.431 | 426.09 | -1.712 |
| -0.9864  | 427.1  | -1.441 | 426.26 | -1.71  |
| -0.88329 | 427.27 | -1.448 | 426.43 | -1.708 |
| -0.81544 | 427.44 | -1.453 | 426.59 | -1.705 |
| -0.79286 | 427.61 | -1.457 | 426.76 | -1.703 |
| -0.85704 | 427.78 | -1.463 | 426.93 | -1.7   |
| -0.91976 | 427.95 | -1.471 | 427.1  | -1.698 |
| -0.96836 | 428.12 | -1.476 | 427.27 | -1.695 |
| -0.98929 | 428.29 | -1.477 | 427.44 | -1.693 |
| -0.96472 | 428.46 | -1.478 | 427.61 | -1.69  |
| -1.00413 | 428.63 | -1.482 | 427.78 | -1.687 |
| -1.02435 | 428.8  | -1.489 | 427.95 | -1.685 |
| -1.07741 | 428.97 | -1.496 | 428.12 | -1.682 |
| -1.06254 | 429.14 | -1.502 | 428.29 | -1.679 |
| -1.0443  | 429.31 | -1.503 | 428.46 | -1.676 |
| -1.03437 | 429.48 | -1.503 | 428.63 | -1.674 |
| -0.98495 | 429.65 | -1.509 | 428.8  | -1.671 |
| -0.96611 | 429.82 | -1.519 | 428.97 | -1.669 |
| -0.98961 | 429.99 | -1.527 | 429.14 | -1.666 |

|          |        |        |        |        |
|----------|--------|--------|--------|--------|
| -0.95372 | 430.16 | -1.53  | 429.31 | -1.664 |
| -0.98806 | 430.32 | -1.536 | 429.48 | -1.662 |
| -0.97017 | 430.49 | -1.542 | 429.65 | -1.659 |
| -1.07696 | 430.66 | -1.544 | 429.82 | -1.657 |
| -1.12592 | 430.83 | -1.543 | 429.99 | -1.655 |
| -1.2118  | 431    | -1.546 | 430.16 | -1.653 |
| -1.18536 | 431.17 | -1.55  | 430.33 | -1.65  |
| -1.09741 | 431.34 | -1.547 | 430.5  | -1.648 |
| -1.04567 | 431.51 | -1.541 | 430.67 | -1.645 |
| -0.97461 | 431.68 | -1.537 | 430.84 | -1.643 |
| -1.02336 | 431.85 | -1.538 | 431.01 | -1.64  |
| -1.04045 | 432.02 | -1.539 | 431.18 | -1.636 |
| -1.14385 | 432.19 | -1.538 | 431.35 | -1.633 |
| -1.15103 | 432.36 | -1.534 | 431.53 | -1.629 |
| -1.12737 | 432.53 | -1.53  | 431.7  | -1.626 |
| -1.14862 | 432.7  | -1.527 | 431.87 | -1.622 |
| -1.13653 | 432.87 | -1.525 | 432.04 | -1.618 |
| -1.14897 | 433.04 | -1.519 | 432.21 | -1.614 |
| -1.13777 | 433.21 | -1.512 | 432.38 | -1.61  |
| -1.15228 | 433.38 | -1.508 | 432.55 | -1.606 |
| -1.13436 | 433.55 | -1.506 | 432.72 | -1.602 |
| -1.0962  | 433.72 | -1.504 | 432.89 | -1.598 |
| -1.1573  | 433.89 | -1.497 | 433.06 | -1.594 |
| -1.16885 | 434.07 | -1.488 | 433.23 | -1.59  |
| -1.16281 | 434.24 | -1.476 | 433.4  | -1.586 |
| -1.08497 | 434.41 | -1.472 | 433.57 | -1.582 |
| -1.13022 | 434.58 | -1.47  | 433.74 | -1.578 |
| -1.20331 | 434.75 | -1.466 | 433.91 | -1.574 |
| -1.21139 | 434.92 | -1.46  | 434.08 | -1.571 |
| -1.15432 | 435.09 | -1.456 | 434.25 | -1.567 |
| -1.20357 | 435.26 | -1.458 | 434.42 | -1.564 |
| -1.32208 | 435.43 | -1.455 | 434.6  | -1.561 |
| -1.39809 | 435.6  | -1.448 | 434.77 | -1.558 |
| -1.25887 | 435.77 | -1.436 | 434.94 | -1.555 |
| -1.14704 | 435.94 | -1.427 | 435.11 | -1.552 |
| -1.21791 | 436.11 | -1.419 | 435.28 | -1.549 |
| -1.22995 | 436.28 | -1.415 | 435.45 | -1.547 |
| -1.23459 | 436.45 | -1.412 | 435.62 | -1.544 |
| -1.18717 | 436.62 | -1.407 | 435.79 | -1.541 |
| -1.23866 | 436.79 | -1.399 | 435.96 | -1.539 |
| -1.28823 | 436.96 | -1.393 | 436.13 | -1.537 |
| -1.28655 | 437.13 | -1.388 | 436.3  | -1.535 |
| -1.37077 | 437.3  | -1.383 | 436.47 | -1.533 |
| -1.30634 | 437.47 | -1.376 | 436.64 | -1.531 |
| -1.30698 | 437.64 | -1.371 | 436.81 | -1.529 |
| -1.30881 | 437.82 | -1.368 | 436.99 | -1.527 |
| -1.24296 | 437.99 | -1.369 | 437.16 | -1.525 |
| -1.20595 | 438.16 | -1.366 | 437.33 | -1.523 |
| -1.15519 | 438.33 | -1.359 | 437.5  | -1.522 |
| -1.40234 | 438.5  | -1.349 | 437.67 | -1.52  |
| -1.45091 | 438.67 | -1.343 | 437.84 | -1.518 |
| -1.52829 | 438.84 | -1.343 | 438.01 | -1.516 |
| -1.49908 | 439.01 | -1.341 | 438.18 | -1.513 |
| -1.54454 | 439.18 | -1.335 | 438.35 | -1.511 |

|          |        |        |        |        |
|----------|--------|--------|--------|--------|
| -1.42672 | 439.35 | -1.327 | 438.52 | -1.508 |
| -1.46466 | 439.52 | -1.324 | 438.69 | -1.506 |
| -1.30007 | 439.69 | -1.321 | 438.87 | -1.503 |
| -1.37558 | 439.86 | -1.317 | 439.04 | -1.5   |
| -1.20684 | 440.03 | -1.311 | 439.21 | -1.497 |
| -1.42669 | 440.2  | -1.308 | 439.38 | -1.494 |
| -1.38617 | 440.37 | -1.308 | 439.55 | -1.49  |
| -1.43994 | 440.55 | -1.307 | 439.72 | -1.486 |
| -1.38023 | 440.72 | -1.305 | 439.89 | -1.482 |
| -1.41719 | 440.89 | -1.301 | 440.06 | -1.478 |
| -1.41795 | 441.06 | -1.297 | 440.23 | -1.473 |
| -1.42715 | 441.23 | -1.295 | 440.4  | -1.468 |
| -1.42649 | 441.4  | -1.294 | 440.58 | -1.463 |
| -1.51842 | 441.57 | -1.294 | 440.75 | -1.458 |
| -1.5254  | 441.74 | -1.293 | 440.92 | -1.452 |
| -1.54551 | 441.91 | -1.291 | 441.09 | -1.446 |
| -1.57979 | 442.08 | -1.29  | 441.26 | -1.44  |
| -1.48949 | 442.25 | -1.289 | 441.43 | -1.434 |
| -1.47895 | 442.42 | -1.289 | 441.6  | -1.428 |
| -1.49196 | 442.59 | -1.288 | 441.77 | -1.422 |
| -1.55183 | 442.76 | -1.287 | 441.94 | -1.416 |
| -1.57602 | 442.94 | -1.289 | 442.11 | -1.41  |
| -1.51289 | 443.11 | -1.286 | 442.28 | -1.404 |
| -1.52136 | 443.28 | -1.283 | 442.45 | -1.398 |
| -1.56648 | 443.45 | -1.276 | 442.63 | -1.392 |
| -1.53707 | 443.62 | -1.272 | 442.8  | -1.386 |
| -1.58432 | 443.79 | -1.268 | 442.97 | -1.381 |
| -1.54245 | 443.96 | -1.266 | 443.14 | -1.375 |
| -1.63574 | 444.13 | -1.266 | 443.31 | -1.369 |
| -1.51433 | 444.3  | -1.266 | 443.48 | -1.364 |
| -1.58069 | 444.47 | -1.268 | 443.65 | -1.358 |
| -1.51926 | 444.64 | -1.269 | 443.82 | -1.352 |
| -1.54944 | 444.81 | -1.272 | 443.99 | -1.347 |
| -1.43008 | 444.98 | -1.272 | 444.16 | -1.341 |
| -1.51407 | 445.15 | -1.27  | 444.34 | -1.335 |
| -1.61348 | 445.32 | -1.266 | 444.51 | -1.329 |
| -1.71816 | 445.49 | -1.266 | 444.68 | -1.323 |
| -1.63558 | 445.66 | -1.267 | 444.85 | -1.317 |
| -1.56139 | 445.83 | -1.271 | 445.02 | -1.311 |
| -1.51709 | 446.01 | -1.273 | 445.19 | -1.305 |
| -1.5604  | 446.18 | -1.274 | 445.36 | -1.299 |
| -1.70649 | 446.35 | -1.273 | 445.53 | -1.293 |
| -1.80839 | 446.52 | -1.269 | 445.7  | -1.287 |
| -1.73625 | 446.69 | -1.265 | 445.87 | -1.28  |
| -1.61151 | 446.86 | -1.262 | 446.04 | -1.274 |
| -1.52138 | 447.03 | -1.264 | 446.22 | -1.268 |
| -1.61507 | 447.2  | -1.269 | 446.39 | -1.261 |
| -1.82244 | 447.37 | -1.276 | 446.56 | -1.255 |
| -1.90653 | 447.54 | -1.279 | 446.73 | -1.248 |
| -1.89384 | 447.71 | -1.277 | 446.9  | -1.241 |
| -1.64341 | 447.88 | -1.275 | 447.07 | -1.234 |
| -1.5815  | 448.05 | -1.272 | 447.24 | -1.227 |
| -1.63613 | 448.22 | -1.271 | 447.41 | -1.22  |
| -1.81413 | 448.4  | -1.272 | 447.58 | -1.212 |

|          |        |        |        |        |
|----------|--------|--------|--------|--------|
| -1.80393 | 448.57 | -1.276 | 447.75 | -1.205 |
| -1.73532 | 448.74 | -1.278 | 447.92 | -1.198 |
| -1.59683 | 448.91 | -1.278 | 448.1  | -1.19  |
| -1.6861  | 449.08 | -1.277 | 448.27 | -1.183 |
| -1.65503 | 449.25 | -1.276 | 448.44 | -1.176 |
| -1.79305 | 449.42 | -1.274 | 448.61 | -1.169 |
| -1.78028 | 449.59 | -1.272 | 448.78 | -1.161 |
| -1.78642 | 449.76 | -1.273 | 448.95 | -1.154 |
| -1.66302 | 449.93 | -1.278 | 449.12 | -1.147 |
| -1.60673 | 450.1  | -1.28  | 449.29 | -1.14  |
| -1.68656 | 450.27 | -1.28  | 449.46 | -1.132 |
| -1.81831 | 450.44 | -1.278 | 449.63 | -1.125 |
| -1.9011  | 450.61 | -1.278 | 449.8  | -1.118 |
| -1.93803 | 450.78 | -1.278 | 449.98 | -1.111 |
| -1.9099  | 450.96 | -1.277 | 450.15 | -1.103 |
| -1.80352 | 451.13 | -1.277 | 450.32 | -1.096 |
| -1.7806  | 451.3  | -1.276 | 450.49 | -1.089 |
| -1.81544 | 451.47 | -1.276 | 450.66 | -1.081 |
| -1.91502 | 451.64 | -1.274 | 450.83 | -1.074 |
| -1.87059 | 451.81 | -1.275 | 451    | -1.067 |
| -1.82522 | 451.98 | -1.274 | 451.17 | -1.06  |
| -1.86631 | 452.15 | -1.274 | 451.34 | -1.052 |
| -1.98421 | 452.32 | -1.272 | 451.51 | -1.045 |
| -1.89559 | 452.49 | -1.272 | 451.68 | -1.038 |
| -1.89913 | 452.66 | -1.27  | 451.85 | -1.031 |
| -1.8841  | 452.83 | -1.268 | 452.02 | -1.024 |
| -1.9027  | 453    | -1.266 | 452.19 | -1.017 |
| -1.89048 | 453.17 | -1.264 | 452.37 | -1.01  |
| -1.79788 | 453.34 | -1.264 | 452.54 | -1.004 |
| -1.88107 | 453.52 | -1.264 | 452.71 | -0.997 |
| -1.97771 | 453.69 | -1.265 | 452.88 | -0.99  |
| -1.97188 | 453.86 | -1.264 | 453.05 | -0.984 |
| -2.04013 | 454.03 | -1.263 | 453.22 | -0.977 |
| -1.84927 | 454.2  | -1.262 | 453.39 | -0.971 |
| -1.89939 | 454.37 | -1.26  | 453.56 | -0.964 |
| -1.81551 | 454.54 | -1.256 | 453.73 | -0.957 |
| -1.94741 | 454.71 | -1.254 | 453.9  | -0.951 |
| -2.0091  | 454.88 | -1.253 | 454.07 | -0.944 |
| -2.07833 | 455.05 | -1.251 | 454.24 | -0.937 |
| -1.99273 | 455.22 | -1.253 | 454.41 | -0.93  |
| -1.8717  | 455.39 | -1.255 | 454.58 | -0.923 |
| -1.89605 | 455.56 | -1.256 | 454.76 | -0.916 |
| -1.96362 | 455.73 | -1.256 | 454.93 | -0.91  |
| -2.02745 | 455.9  | -1.254 | 455.1  | -0.903 |
| -2.03217 | 456.07 | -1.255 | 455.27 | -0.896 |
| -2.0157  | 456.25 | -1.255 | 455.44 | -0.89  |
| -1.99278 | 456.42 | -1.256 | 455.61 | -0.884 |
| -1.96931 | 456.59 | -1.254 | 455.78 | -0.877 |
| -1.96866 | 456.76 | -1.254 | 455.95 | -0.871 |
| -2.14229 | 456.93 | -1.253 | 456.12 | -0.865 |
| -2.15466 | 457.1  | -1.253 | 456.29 | -0.859 |
| -2.07212 | 457.27 | -1.251 | 456.46 | -0.853 |
| -1.89886 | 457.44 | -1.251 | 456.63 | -0.846 |
| -1.94821 | 457.61 | -1.251 | 456.8  | -0.84  |

|           |         |         |         |         |
|-----------|---------|---------|---------|---------|
| -2. 15098 | 457. 78 | -1. 252 | 456. 98 | -0. 834 |
| -2. 14402 | 457. 95 | -1. 25  | 457. 15 | -0. 828 |
| -2. 0233  | 458. 12 | -1. 25  | 457. 32 | -0. 822 |
| -1. 90422 | 458. 29 | -1. 249 | 457. 49 | -0. 816 |
| -1. 90369 | 458. 46 | -1. 246 | 457. 66 | -0. 81  |
| -1. 92787 | 458. 63 | -1. 239 | 457. 83 | -0. 804 |
| -1. 9472  | 458. 8  | -1. 233 | 458     | -0. 798 |
| -2. 04811 | 458. 97 | -1. 228 | 458. 17 | -0. 792 |
| -2. 12888 | 459. 15 | -1. 227 | 458. 34 | -0. 786 |
| -2. 11613 | 459. 32 | -1. 227 | 458. 51 | -0. 779 |
| -2. 04083 | 459. 49 | -1. 226 | 458. 68 | -0. 773 |
| -1. 88556 | 459. 66 | -1. 222 | 458. 85 | -0. 767 |
| -1. 86565 | 459. 83 | -1. 217 | 459. 02 | -0. 76  |
| -1. 90758 | 460     | -1. 215 | 459. 19 | -0. 754 |
| -2. 06257 | 460. 17 | -1. 216 | 459. 36 | -0. 747 |
| -2. 21308 | 460. 34 | -1. 217 | 459. 54 | -0. 741 |
| -2. 04829 | 460. 51 | -1. 215 | 459. 71 | -0. 735 |
| -1. 89616 | 460. 68 | -1. 213 | 459. 88 | -0. 728 |
| -1. 77605 | 460. 85 | -1. 211 | 460. 05 | -0. 722 |
| -1. 9757  | 461. 02 | -1. 211 | 460. 22 | -0. 715 |
| -2. 15845 | 461. 19 | -1. 209 | 460. 39 | -0. 709 |
| -2. 20442 | 461. 36 | -1. 206 | 460. 56 | -0. 703 |
| -2. 14799 | 461. 53 | -1. 202 | 460. 73 | -0. 697 |
| -2. 02383 | 461. 7  | -1. 2   | 460. 9  | -0. 691 |
| -1. 98009 | 461. 87 | -1. 199 | 461. 07 | -0. 686 |
| -2. 06095 | 462. 04 | -1. 199 | 461. 24 | -0. 68  |
| -2. 1576  | 462. 21 | -1. 199 | 461. 41 | -0. 674 |
| -2. 17983 | 462. 38 | -1. 201 | 461. 58 | -0. 669 |
| -2. 1711  | 462. 55 | -1. 203 | 461. 75 | -0. 663 |
| -2. 0849  | 462. 73 | -1. 203 | 461. 92 | -0. 658 |
| -2. 08416 | 462. 9  | -1. 204 | 462. 1  | -0. 653 |
| -1. 9875  | 463. 07 | -1. 203 | 462. 27 | -0. 648 |
| -2. 14283 | 463. 24 | -1. 201 | 462. 44 | -0. 644 |
| -2. 19967 | 463. 41 | -1. 197 | 462. 61 | -0. 639 |
| -2. 22685 | 463. 58 | -1. 198 | 462. 78 | -0. 634 |
| -2. 06751 | 463. 75 | -1. 201 | 462. 95 | -0. 63  |
| -1. 93096 | 463. 92 | -1. 203 | 463. 12 | -0. 625 |
| -1. 98787 | 464. 09 | -1. 2   | 463. 29 | -0. 621 |
| -2. 07776 | 464. 26 | -1. 197 | 463. 46 | -0. 616 |
| -2. 14361 | 464. 43 | -1. 192 | 463. 63 | -0. 612 |
| -2. 11306 | 464. 6  | -1. 185 | 463. 8  | -0. 607 |
| -2. 07036 | 464. 77 | -1. 175 | 463. 97 | -0. 603 |
| -2. 05704 | 464. 94 | -1. 169 | 464. 14 | -0. 599 |
| -1. 94931 | 465. 11 | -1. 169 | 464. 31 | -0. 595 |
| -1. 96889 | 465. 28 | -1. 172 | 464. 48 | -0. 591 |
| -2. 13369 | 465. 45 | -1. 173 | 464. 65 | -0. 587 |
| -2. 1573  | 465. 62 | -1. 173 | 464. 82 | -0. 583 |
| -1. 96843 | 465. 79 | -1. 17  | 464. 99 | -0. 579 |
| -1. 69754 | 465. 96 | -1. 169 | 465. 16 | -0. 574 |
| -1. 84508 | 466. 13 | -1. 165 | 465. 33 | -0. 57  |
| -2. 04    | 466. 31 | -1. 165 | 465. 5  | -0. 566 |
| -2. 17351 | 466. 48 | -1. 163 | 465. 67 | -0. 562 |
| -2. 07898 | 466. 65 | -1. 161 | 465. 85 | -0. 558 |
| -1. 86984 | 466. 82 | -1. 157 | 466. 02 | -0. 554 |

|          |        |        |        |        |
|----------|--------|--------|--------|--------|
| -1.75537 | 466.99 | -1.156 | 466.19 | -0.55  |
| -1.75334 | 467.16 | -1.157 | 466.36 | -0.546 |
| -1.94532 | 467.33 | -1.16  | 466.53 | -0.542 |
| -2.11831 | 467.5  | -1.162 | 466.7  | -0.538 |
| -2.10108 | 467.67 | -1.162 | 466.87 | -0.534 |
| -1.99823 | 467.84 | -1.162 | 467.04 | -0.53  |
| -1.9019  | 468.01 | -1.16  | 467.21 | -0.526 |
| -1.91745 | 468.18 | -1.159 | 467.38 | -0.522 |
| -2.01673 | 468.35 | -1.161 | 467.55 | -0.519 |
| -2.04468 | 468.52 | -1.164 | 467.72 | -0.515 |
| -2.03728 | 468.69 | -1.164 | 467.89 | -0.511 |
| -1.95747 | 468.86 | -1.16  | 468.06 | -0.507 |
| -1.86009 | 469.03 | -1.155 | 468.23 | -0.503 |
| -1.82896 | 469.2  | -1.155 | 468.4  | -0.5   |
| -1.85932 | 469.37 | -1.155 | 468.57 | -0.496 |
| -2.00312 | 469.54 | -1.155 | 468.74 | -0.493 |
| -1.94806 | 469.71 | -1.152 | 468.91 | -0.489 |
| -2.00827 | 469.88 | -1.152 | 469.08 | -0.486 |
| -1.7844  | 470.05 | -1.153 | 469.26 | -0.483 |
| -1.8691  | 470.22 | -1.155 | 469.43 | -0.48  |
| -1.68901 | 470.39 | -1.158 | 469.6  | -0.478 |
| -1.7711  | 470.56 | -1.159 | 469.77 | -0.475 |
| -1.82879 | 470.73 | -1.157 | 469.94 | -0.472 |
| -2.01729 | 470.91 | -1.153 | 470.11 | -0.47  |
| -1.98891 | 471.08 | -1.148 | 470.28 | -0.468 |
| -1.94663 | 471.25 | -1.143 | 470.45 | -0.465 |
| -1.84858 | 471.42 | -1.139 | 470.62 | -0.463 |
| -1.83146 | 471.59 | -1.134 | 470.79 | -0.462 |
| -1.86879 | 471.76 | -1.131 | 470.96 | -0.46  |
| -1.9216  | 471.93 | -1.13  | 471.13 | -0.459 |
| -2.01592 | 472.1  | -1.132 | 471.3  | -0.457 |
| -1.99227 | 472.27 | -1.133 | 471.47 | -0.456 |
| -1.91651 | 472.44 | -1.131 | 471.64 | -0.455 |
| -1.94373 | 472.61 | -1.125 | 471.81 | -0.454 |
| -1.82655 | 472.78 | -1.123 | 471.98 | -0.454 |
| -1.9502  | 472.95 | -1.121 | 472.15 | -0.453 |
| -1.97239 | 473.12 | -1.122 | 472.32 | -0.452 |
| -2.12728 | 473.29 | -1.125 | 472.49 | -0.452 |
| -1.95305 | 473.46 | -1.132 | 472.66 | -0.451 |
| -1.91933 | 473.63 | -1.137 | 472.83 | -0.451 |
| -2.02104 | 473.8  | -1.139 | 473    | -0.45  |
| -2.01042 | 473.97 | -1.139 | 473.17 | -0.449 |
| -2.06115 | 474.14 | -1.14  | 473.34 | -0.448 |
| -2.00216 | 474.31 | -1.138 | 473.51 | -0.447 |
| -2.00018 | 474.48 | -1.133 | 473.68 | -0.446 |
| -1.89577 | 474.65 | -1.128 | 473.85 | -0.444 |
| -1.77498 | 474.82 | -1.125 | 474.02 | -0.443 |
| -1.94456 | 474.99 | -1.123 | 474.19 | -0.441 |
| -1.94701 | 475.16 | -1.12  | 474.36 | -0.439 |
| -1.96384 | 475.33 | -1.116 | 474.54 | -0.437 |
| -1.93785 | 475.5  | -1.115 | 474.71 | -0.435 |
| -1.86834 | 475.67 | -1.116 | 474.88 | -0.433 |
| -1.82934 | 475.84 | -1.114 | 475.05 | -0.431 |
| -1.82223 | 476.01 | -1.113 | 475.22 | -0.428 |

|          |        |        |        |        |
|----------|--------|--------|--------|--------|
| -1.90058 | 476.18 | -1.112 | 475.39 | -0.426 |
| -1.92744 | 476.35 | -1.114 | 475.56 | -0.423 |
| -1.88346 | 476.52 | -1.112 | 475.73 | -0.421 |
| -1.91885 | 476.69 | -1.109 | 475.9  | -0.418 |
| -1.84548 | 476.87 | -1.105 | 476.07 | -0.416 |
| -1.84353 | 477.04 | -1.101 | 476.24 | -0.413 |
| -1.83742 | 477.21 | -1.096 | 476.41 | -0.41  |
| -1.84376 | 477.38 | -1.09  | 476.58 | -0.407 |
| -1.91314 | 477.55 | -1.086 | 476.75 | -0.404 |
| -1.86758 | 477.72 | -1.083 | 476.92 | -0.401 |
| -1.89258 | 477.89 | -1.082 | 477.09 | -0.398 |
| -1.86823 | 478.06 | -1.082 | 477.26 | -0.396 |
| -1.92376 | 478.23 | -1.082 | 477.43 | -0.393 |
| -1.92568 | 478.4  | -1.082 | 477.6  | -0.391 |
| -1.82937 | 478.57 | -1.081 | 477.77 | -0.388 |
| -1.73121 | 478.74 | -1.08  | 477.94 | -0.386 |
| -1.70591 | 478.91 | -1.079 | 478.11 | -0.383 |
| -1.70312 | 479.08 | -1.075 | 478.28 | -0.381 |
| -1.83383 | 479.25 | -1.068 | 478.45 | -0.379 |
| -1.79407 | 479.42 | -1.063 | 478.62 | -0.377 |
| -1.92239 | 479.59 | -1.06  | 478.79 | -0.374 |
| -1.86679 | 479.76 | -1.059 | 478.96 | -0.372 |
| -1.96526 | 479.93 | -1.057 | 479.13 | -0.371 |
| -2.00534 | 480.1  | -1.056 | 479.3  | -0.369 |
| -2.02609 | 480.27 | -1.053 | 479.47 | -0.367 |
| -2.08668 | 480.44 | -1.051 | 479.64 | -0.365 |
| -1.93278 | 480.61 | -1.049 | 479.81 | -0.364 |
| -1.85375 | 480.78 | -1.049 | 479.98 | -0.362 |
| -1.69737 | 480.95 | -1.046 | 480.15 | -0.361 |
| -1.75478 | 481.12 | -1.044 | 480.32 | -0.36  |
| -1.84113 | 481.29 | -1.04  | 480.49 | -0.359 |
| -1.96707 | 481.46 | -1.037 | 480.66 | -0.358 |
| -1.88215 | 481.63 | -1.036 | 480.83 | -0.358 |
| -1.79118 | 481.8  | -1.036 | 481    | -0.357 |
| -1.7079  | 481.97 | -1.034 | 481.17 | -0.356 |
| -1.80043 | 482.14 | -1.026 | 481.34 | -0.356 |
| -1.75185 | 482.31 | -1.017 | 481.51 | -0.355 |
| -1.86082 | 482.48 | -1.008 | 481.68 | -0.355 |
| -1.76841 | 482.65 | -1     | 481.85 | -0.354 |
| -1.82049 | 482.83 | -0.991 | 482.02 | -0.354 |
| -1.70694 | 483    | -0.988 | 482.19 | -0.353 |
| -1.72051 | 483.17 | -0.988 | 482.36 | -0.353 |
| -1.6763  | 483.34 | -0.99  | 482.53 | -0.352 |
| -1.78561 | 483.51 | -0.987 | 482.7  | -0.351 |
| -1.84938 | 483.68 | -0.983 | 482.87 | -0.351 |
| -1.88168 | 483.85 | -0.98  | 483.04 | -0.35  |
| -1.74897 | 484.02 | -0.979 | 483.21 | -0.35  |
| -1.6506  | 484.19 | -0.977 | 483.38 | -0.35  |
| -1.75465 | 484.36 | -0.97  | 483.55 | -0.349 |
| -1.67949 | 484.53 | -0.961 | 483.72 | -0.349 |
| -1.78114 | 484.7  | -0.955 | 483.89 | -0.349 |
| -1.60001 | 484.87 | -0.953 | 484.06 | -0.349 |
| -1.63686 | 485.04 | -0.95  | 484.23 | -0.348 |
| -1.56355 | 485.21 | -0.949 | 484.4  | -0.348 |

|          |        |        |        |        |
|----------|--------|--------|--------|--------|
| -1.58313 | 485.38 | -0.948 | 484.57 | -0.348 |
| -1.68683 | 485.55 | -0.948 | 484.74 | -0.348 |
| -1.66736 | 485.72 | -0.947 | 484.91 | -0.348 |
| -1.70079 | 485.89 | -0.945 | 485.08 | -0.347 |
| -1.59412 | 486.06 | -0.945 | 485.25 | -0.347 |
| -1.6352  | 486.23 | -0.945 | 485.42 | -0.347 |
| -1.60782 | 486.4  | -0.944 | 485.59 | -0.346 |
| -1.67458 | 486.57 | -0.939 | 485.76 | -0.346 |
| -1.74249 | 486.74 | -0.935 | 485.93 | -0.345 |
| -1.62414 | 486.91 | -0.93  | 486.1  | -0.345 |
| -1.52416 | 487.08 | -0.925 | 486.27 | -0.344 |
| -1.55646 | 487.25 | -0.92  | 486.44 | -0.343 |
| -1.62419 | 487.42 | -0.917 | 486.61 | -0.342 |
| -1.6568  | 487.59 | -0.914 | 486.78 | -0.342 |
| -1.51201 | 487.76 | -0.913 | 486.95 | -0.341 |
| -1.70817 | 487.93 | -0.911 | 487.12 | -0.34  |
| -1.69356 | 488.1  | -0.908 | 487.29 | -0.339 |
| -1.63003 | 488.27 | -0.906 | 487.46 | -0.337 |
| -1.5882  | 488.44 | -0.902 | 487.63 | -0.336 |
| -1.76117 | 488.61 | -0.9   | 487.8  | -0.335 |
| -1.90284 | 488.78 | -0.899 | 487.97 | -0.334 |
| -1.93359 | 488.95 | -0.899 | 488.14 | -0.332 |
| -1.84136 | 489.12 | -0.9   | 488.31 | -0.331 |
| -1.81016 | 489.29 | -0.901 | 488.48 | -0.329 |
| -1.73273 | 489.46 | -0.898 | 488.65 | -0.328 |
| -1.75412 | 489.63 | -0.894 | 488.82 | -0.326 |
| -1.82219 | 489.8  | -0.888 | 488.99 | -0.325 |
| -1.7837  | 489.97 | -0.886 | 489.16 | -0.324 |
| -1.7727  | 490.14 | -0.885 | 489.33 | -0.322 |
| -1.54188 | 490.31 | -0.882 | 489.5  | -0.321 |
| -1.59468 | 490.48 | -0.879 | 489.67 | -0.32  |
| -1.64732 | 490.65 | -0.876 | 489.84 | -0.318 |
| -1.84322 | 490.82 | -0.871 | 490.01 | -0.317 |
| -1.83819 | 490.99 | -0.864 | 490.18 | -0.316 |
| -1.77353 | 491.16 | -0.858 | 490.35 | -0.315 |
| -1.68463 | 491.33 | -0.855 | 490.52 | -0.314 |
| -1.63335 | 491.5  | -0.855 | 490.69 | -0.313 |
| -1.6229  | 491.67 | -0.855 | 490.86 | -0.312 |
| -1.65434 | 491.84 | -0.855 | 491.03 | -0.31  |
| -1.71493 | 492.01 | -0.854 | 491.2  | -0.309 |
| -1.82488 | 492.18 | -0.852 | 491.37 | -0.308 |
| -1.80724 | 492.35 | -0.848 | 491.54 | -0.307 |
| -1.77794 | 492.52 | -0.845 | 491.71 | -0.306 |
| -1.69856 | 492.69 | -0.842 | 491.88 | -0.304 |
| -1.72094 | 492.86 | -0.841 | 492.05 | -0.303 |
| -1.74139 | 493.03 | -0.841 | 492.22 | -0.302 |
| -1.55723 | 493.2  | -0.842 | 492.39 | -0.3   |
| -1.60443 | 493.37 | -0.839 | 492.56 | -0.299 |
| -1.54586 | 493.54 | -0.834 | 492.73 | -0.298 |
| -1.69285 | 493.71 | -0.829 | 492.9  | -0.296 |
| -1.66144 | 493.88 | -0.823 | 493.07 | -0.295 |
| -1.67163 | 494.05 | -0.817 | 493.24 | -0.294 |
| -1.67866 | 494.22 | -0.811 | 493.41 | -0.292 |
| -1.73783 | 494.39 | -0.805 | 493.58 | -0.291 |



|          |        |        |        |        |
|----------|--------|--------|--------|--------|
| -1.70994 | 494.56 | -0.8   | 493.75 | -0.29  |
| -1.57853 | 494.73 | -0.796 | 493.92 | -0.289 |
| -1.44583 | 494.9  | -0.794 | 494.09 | -0.288 |
| -1.44476 | 495.07 | -0.792 | 494.26 | -0.287 |
| -1.59846 | 495.24 | -0.791 | 494.42 | -0.286 |
| -1.54274 | 495.41 | -0.788 | 494.59 | -0.286 |
| -1.66881 | 495.58 | -0.785 | 494.76 | -0.285 |
| -1.59896 | 495.75 | -0.784 | 494.93 | -0.285 |
| -1.61385 | 495.92 | -0.782 | 495.1  | -0.285 |
| -1.53021 | 496.09 | -0.78  | 495.27 | -0.285 |
| -1.53272 | 496.26 | -0.774 | 495.44 | -0.285 |
| -1.66609 | 496.43 | -0.768 | 495.61 | -0.285 |
| -1.55627 | 496.6  | -0.765 | 495.78 | -0.285 |
| -1.48934 | 496.77 | -0.762 | 495.95 | -0.285 |
| -1.36674 | 496.94 | -0.76  | 496.12 | -0.285 |
| -1.47977 | 497.11 | -0.756 | 496.29 | -0.285 |
| -1.62049 | 497.28 | -0.751 | 496.46 | -0.285 |
| -1.67853 | 497.45 | -0.745 | 496.63 | -0.285 |
| -1.65891 | 497.62 | -0.74  | 496.8  | -0.285 |
| -1.51865 | 497.79 | -0.735 | 496.97 | -0.286 |
| -1.41569 | 497.96 | -0.73  | 497.14 | -0.286 |
| -1.33686 | 498.13 | -0.725 | 497.31 | -0.287 |
| -1.46802 | 498.3  | -0.723 | 497.48 | -0.287 |
| -1.5634  | 498.47 | -0.723 | 497.65 | -0.287 |
| -1.56194 | 498.64 | -0.72  | 497.82 | -0.288 |
| -1.4225  | 498.8  | -0.715 | 497.99 | -0.288 |
| -1.31802 | 498.97 | -0.709 | 498.16 | -0.289 |
| -1.31236 | 499.14 | -0.703 | 498.33 | -0.289 |
| -1.28171 | 499.31 | -0.7   | 498.5  | -0.289 |
| -1.3723  | 499.48 | -0.699 | 498.67 | -0.289 |
| -1.40685 | 499.65 | -0.701 | 498.83 | -0.289 |
| -1.48362 | 499.82 | -0.701 | 499    | -0.289 |
| -1.45347 | 499.99 | -0.699 | 499.17 | -0.289 |
| -1.48867 | 500.16 | -0.694 | 499.34 | -0.289 |
| -1.52551 | 500.33 | -0.687 | 499.51 | -0.289 |
| -1.48618 | 500.5  | -0.681 | 499.68 | -0.288 |
| -1.44587 | 500.67 | -0.675 | 499.85 | -0.288 |
| -1.35398 | 500.84 | -0.672 | 500.02 | -0.287 |
| -1.28641 | 501.01 | -0.67  | 500.19 | -0.286 |
| -1.28371 | 501.18 | -0.668 | 500.36 | -0.285 |
| -1.3015  | 501.35 | -0.663 | 500.53 | -0.284 |
| -1.3828  | 501.52 | -0.657 | 500.7  | -0.283 |
| -1.43314 | 501.69 | -0.651 | 500.87 | -0.282 |
| -1.47705 | 501.86 | -0.649 | 501.04 | -0.28  |
| -1.41794 | 502.03 | -0.647 | 501.21 | -0.279 |
| -1.3741  | 502.2  | -0.644 | 501.38 | -0.278 |
| -1.3293  | 502.37 | -0.639 | 501.55 | -0.276 |
| -1.42535 | 502.54 | -0.637 | 501.72 | -0.274 |
| -1.41868 | 502.71 | -0.637 | 501.89 | -0.273 |
| -1.36325 | 502.88 | -0.638 | 502.06 | -0.271 |
| -1.30937 | 503.05 | -0.639 | 502.23 | -0.27  |
| -1.25433 | 503.22 | -0.639 | 502.4  | -0.268 |
| -1.29624 | 503.39 | -0.638 | 502.57 | -0.267 |
| -1.33308 | 503.55 | -0.634 | 502.73 | -0.265 |

|          |        |        |        |        |
|----------|--------|--------|--------|--------|
| -1.33225 | 503.72 | -0.629 | 502.9  | -0.264 |
| -1.32154 | 503.89 | -0.624 | 503.07 | -0.263 |
| -1.29369 | 504.06 | -0.62  | 503.24 | -0.261 |
| -1.21798 | 504.23 | -0.618 | 503.41 | -0.26  |
| -1.19196 | 504.4  | -0.615 | 503.58 | -0.259 |
| -1.15635 | 504.57 | -0.611 | 503.75 | -0.259 |
| -1.24719 | 504.74 | -0.605 | 503.92 | -0.258 |
| -1.26852 | 504.91 | -0.6   | 504.09 | -0.257 |
| -1.31019 | 505.08 | -0.597 | 504.26 | -0.257 |
| -1.36027 | 505.25 | -0.593 | 504.43 | -0.257 |
| -1.41611 | 505.42 | -0.589 | 504.6  | -0.256 |
| -1.38753 | 505.59 | -0.585 | 504.77 | -0.256 |
| -1.35351 | 505.76 | -0.583 | 504.94 | -0.256 |
| -1.21295 | 505.93 | -0.581 | 505.11 | -0.256 |
| -1.21552 | 506.1  | -0.579 | 505.28 | -0.256 |
| -1.11461 | 506.27 | -0.577 | 505.45 | -0.256 |
| -1.19346 | 506.44 | -0.576 | 505.62 | -0.255 |
| -1.16351 | 506.61 | -0.573 | 505.79 | -0.255 |
| -1.29138 | 506.78 | -0.569 | 505.96 | -0.255 |
| -1.23931 | 506.95 | -0.562 | 506.12 | -0.255 |
| -1.27504 | 507.12 | -0.557 | 506.29 | -0.255 |
| -1.16463 | 507.29 | -0.555 | 506.46 | -0.255 |
| -1.18419 | 507.46 | -0.556 | 506.63 | -0.256 |
| -1.09802 | 507.62 | -0.557 | 506.8  | -0.256 |
| -1.06048 | 507.79 | -0.555 | 506.97 | -0.256 |
| -1.06493 | 507.96 | -0.551 | 507.14 | -0.257 |
| -1.20526 | 508.13 | -0.546 | 507.31 | -0.257 |
| -1.27469 | 508.3  | -0.541 | 507.48 | -0.258 |
| -1.30337 | 508.47 | -0.536 | 507.65 | -0.258 |
| -1.14685 | 508.64 | -0.532 | 507.82 | -0.259 |
| -1.05395 | 508.81 | -0.528 | 507.99 | -0.259 |
| -0.99411 | 508.98 | -0.525 | 508.16 | -0.26  |
| -1.06242 | 509.15 | -0.523 | 508.33 | -0.26  |
| -1.15831 | 509.32 | -0.522 | 508.5  | -0.26  |
| -1.21106 | 509.49 | -0.521 | 508.67 | -0.261 |
| -1.14492 | 509.66 | -0.519 | 508.84 | -0.261 |
| -1.06164 | 509.83 | -0.516 | 509    | -0.261 |
| -1.0009  | 510    | -0.515 | 509.17 | -0.262 |
| -1.0328  | 510.17 | -0.515 | 509.34 | -0.262 |
| -1.14645 | 510.34 | -0.515 | 509.51 | -0.262 |
| -1.16064 | 510.51 | -0.512 | 509.68 | -0.262 |
| -1.16331 | 510.68 | -0.51  | 509.85 | -0.263 |
| -1.07182 | 510.85 | -0.509 | 510.02 | -0.263 |
| -1.04609 | 511.02 | -0.508 | 510.19 | -0.263 |
| -1.08567 | 511.19 | -0.504 | 510.36 | -0.263 |
| -1.17237 | 511.36 | -0.499 | 510.53 | -0.264 |
| -1.1817  | 511.52 | -0.493 | 510.7  | -0.264 |
| -1.09409 | 511.69 | -0.487 | 510.87 | -0.264 |
| -0.92619 | 511.86 | -0.482 | 511.04 | -0.264 |
| -0.92318 | 512.03 | -0.476 | 511.21 | -0.265 |
| -0.96463 | 512.2  | -0.472 | 511.38 | -0.265 |
| -1.03832 | 512.37 | -0.469 | 511.55 | -0.265 |
| -1.06235 | 512.54 | -0.467 | 511.72 | -0.266 |
| -1.03711 | 512.71 | -0.467 | 511.88 | -0.266 |

|          |        |        |        |        |
|----------|--------|--------|--------|--------|
| -0.99972 | 512.88 | -0.465 | 512.05 | -0.266 |
| -0.93346 | 513.05 | -0.464 | 512.22 | -0.266 |
| -0.91438 | 513.22 | -0.461 | 512.39 | -0.266 |
| -0.96963 | 513.39 | -0.46  | 512.56 | -0.267 |
| -0.97421 | 513.56 | -0.458 | 512.73 | -0.267 |
| -1.0283  | 513.73 | -0.458 | 512.9  | -0.267 |
| -0.97171 | 513.9  | -0.458 | 513.07 | -0.267 |
| -0.96391 | 514.07 | -0.457 | 513.24 | -0.267 |
| -0.9298  | 514.24 | -0.455 | 513.41 | -0.268 |
| -1.01794 | 514.41 | -0.451 | 513.58 | -0.268 |
| -1.04202 | 514.58 | -0.445 | 513.75 | -0.268 |
| -0.95102 | 514.75 | -0.441 | 513.92 | -0.268 |
| -0.87162 | 514.92 | -0.438 | 514.09 | -0.268 |
| -0.85612 | 515.09 | -0.434 | 514.26 | -0.268 |
| -0.95954 | 515.26 | -0.431 | 514.43 | -0.268 |
| -0.95955 | 515.43 | -0.429 | 514.6  | -0.268 |
| -0.9318  | 515.6  | -0.428 | 514.77 | -0.268 |
| -0.89441 | 515.77 | -0.426 | 514.93 | -0.267 |
| -0.85086 | 515.94 | -0.423 | 515.1  | -0.267 |
| -0.8161  | 516.1  | -0.417 | 515.27 | -0.266 |
| -0.83892 | 516.27 | -0.411 | 515.44 | -0.266 |
| -0.89557 | 516.44 | -0.407 | 515.61 | -0.265 |
| -0.9317  | 516.61 | -0.406 | 515.78 | -0.264 |
| -0.86766 | 516.78 | -0.407 | 515.95 | -0.263 |
| -0.78977 | 516.95 | -0.408 | 516.12 | -0.262 |
| -0.80815 | 517.12 | -0.409 | 516.29 | -0.261 |
| -0.79625 | 517.29 | -0.41  | 516.46 | -0.26  |
| -0.9017  | 517.46 | -0.409 | 516.63 | -0.259 |
| -0.9171  | 517.63 | -0.406 | 516.8  | -0.258 |
| -0.96283 | 517.8  | -0.402 | 516.97 | -0.257 |
| -0.84801 | 517.97 | -0.397 | 517.14 | -0.256 |
| -0.74728 | 518.14 | -0.394 | 517.31 | -0.255 |
| -0.72341 | 518.31 | -0.393 | 517.48 | -0.254 |
| -0.78739 | 518.48 | -0.394 | 517.65 | -0.252 |
| -0.8717  | 518.65 | -0.393 | 517.81 | -0.251 |
| -0.83734 | 518.82 | -0.391 | 517.98 | -0.25  |
| -0.83539 | 518.99 | -0.387 | 518.15 | -0.249 |
| -0.80425 | 519.16 | -0.383 | 518.32 | -0.247 |
| -0.8036  | 519.33 | -0.379 | 518.49 | -0.246 |
| -0.77269 | 519.5  | -0.376 | 518.66 | -0.244 |
| -0.7624  | 519.67 | -0.373 | 518.83 | -0.243 |
| -0.77274 | 519.83 | -0.371 | 519    | -0.242 |
| -0.73526 | 520    | -0.37  | 519.17 | -0.24  |
| -0.79386 | 520.17 | -0.367 | 519.34 | -0.239 |
| -0.85646 | 520.34 | -0.365 | 519.51 | -0.238 |
| -0.91719 | 520.51 | -0.364 | 519.68 | -0.237 |
| -0.75742 | 520.68 | -0.365 | 519.85 | -0.236 |
| -0.65038 | 520.85 | -0.368 | 520.02 | -0.236 |
| -0.62521 | 521.02 | -0.369 | 520.19 | -0.235 |
| -0.70093 | 521.19 | -0.369 | 520.36 | -0.235 |
| -0.73393 | 521.36 | -0.367 | 520.53 | -0.235 |
| -0.68436 | 521.53 | -0.364 | 520.7  | -0.234 |
| -0.72948 | 521.7  | -0.36  | 520.86 | -0.234 |
| -0.75214 | 521.87 | -0.356 | 521.03 | -0.234 |

|          |        |        |        |        |
|----------|--------|--------|--------|--------|
| -0.8045  | 522.04 | -0.352 | 521.2  | -0.234 |
| -0.88784 | 522.21 | -0.349 | 521.37 | -0.235 |
| -0.67416 | 522.38 | -0.344 | 521.54 | -0.235 |
| -0.17209 | 522.55 | -0.341 | 521.71 | -0.235 |
| -0.21337 | 522.72 | -0.337 | 521.88 | -0.236 |
| -0.61346 | 522.89 | -0.336 | 522.05 | -0.237 |
| -1.14258 | 523.06 | -0.337 | 522.22 | -0.237 |
| -1.0342  | 523.23 | -0.339 | 522.39 | -0.238 |
| -0.81947 | 523.4  | -0.339 | 522.56 | -0.239 |
| -0.74225 | 523.57 | -0.338 | 522.73 | -0.239 |
| -0.75783 | 523.73 | -0.337 | 522.9  | -0.24  |
| -0.78497 | 523.9  | -0.334 | 523.07 | -0.241 |
| -0.78489 | 524.07 | -0.331 | 523.24 | -0.242 |
| -0.67587 | 524.24 | -0.328 | 523.41 | -0.242 |
| -0.60927 | 524.41 | -0.326 | 523.58 | -0.243 |
| -0.61958 | 524.58 | -0.326 | 523.75 | -0.243 |
| -0.62956 | 524.75 | -0.327 | 523.92 | -0.244 |
| -0.61736 | 524.92 | -0.328 | 524.09 | -0.244 |
| -0.60066 | 525.09 | -0.327 | 524.25 | -0.245 |
| -0.61711 | 525.26 | -0.324 | 524.42 | -0.245 |
| -0.67279 | 525.43 | -0.32  | 524.59 | -0.245 |
| -0.6829  | 525.6  | -0.317 | 524.76 | -0.245 |
| -0.64431 | 525.77 | -0.315 | 524.93 | -0.246 |
| -0.55535 | 525.94 | -0.313 | 525.1  | -0.246 |
| -0.5461  | 526.11 | -0.311 | 525.27 | -0.246 |
| -0.57389 | 526.28 | -0.311 | 525.44 | -0.246 |
| -0.64295 | 526.45 | -0.309 | 525.61 | -0.245 |
| -0.67393 | 526.62 | -0.307 | 525.78 | -0.245 |
| -0.67934 | 526.78 | -0.304 | 525.95 | -0.245 |
| -0.63188 | 526.95 | -0.301 | 526.12 | -0.245 |
| -0.5976  | 527.12 | -0.296 | 526.29 | -0.245 |
| -0.58358 | 527.29 | -0.293 | 526.46 | -0.245 |
| -0.57889 | 527.46 | -0.29  | 526.62 | -0.245 |
| -0.55525 | 527.63 | -0.29  | 526.79 | -0.245 |
| -0.55887 | 527.8  | -0.289 | 526.96 | -0.245 |
| -0.54558 | 527.97 | -0.288 | 527.13 | -0.245 |
| -0.61927 | 528.14 | -0.287 | 527.3  | -0.245 |
| -0.60913 | 528.31 | -0.286 | 527.47 | -0.245 |
| -0.64008 | 528.48 | -0.286 | 527.64 | -0.245 |
| -0.59847 | 528.65 | -0.285 | 527.81 | -0.245 |
| -0.57212 | 528.82 | -0.286 | 527.98 | -0.245 |
| -0.58706 | 528.99 | -0.286 | 528.15 | -0.246 |
| -0.5191  | 529.16 | -0.285 | 528.32 | -0.246 |
| -0.54763 | 529.33 | -0.283 | 528.48 | -0.246 |
| -0.56263 | 529.49 | -0.28  | 528.65 | -0.247 |
| -0.57366 | 529.66 | -0.278 | 528.82 | -0.247 |
| -0.46145 | 529.83 | -0.275 | 528.99 | -0.248 |
| -0.37188 | 530    | -0.272 | 529.16 | -0.248 |
| -0.42308 | 530.17 | -0.269 | 529.33 | -0.249 |
| -0.53415 | 530.34 | -0.267 | 529.5  | -0.249 |
| -0.58518 | 530.51 | -0.266 | 529.67 | -0.25  |
| -0.58908 | 530.68 | -0.265 | 529.84 | -0.25  |
| -0.58945 | 530.85 | -0.264 | 530.01 | -0.25  |
| -0.60855 | 531.02 | -0.263 | 530.17 | -0.251 |

|          |        |        |        |        |
|----------|--------|--------|--------|--------|
| -0.55074 | 531.19 | -0.262 | 530.34 | -0.251 |
| -0.50353 | 531.36 | -0.261 | 530.51 | -0.251 |
| -0.49778 | 531.52 | -0.259 | 530.68 | -0.251 |
| -0.51107 | 531.69 | -0.257 | 530.85 | -0.252 |
| -0.52419 | 531.86 | -0.255 | 531.02 | -0.252 |
| -0.51587 | 532.03 | -0.255 | 531.19 | -0.252 |
| -0.50158 | 532.2  | -0.255 | 531.36 | -0.252 |
| -0.45493 | 532.37 | -0.255 | 531.53 | -0.253 |
| -0.43278 | 532.54 | -0.256 | 531.7  | -0.253 |
| -0.45983 | 532.71 | -0.257 | 531.86 | -0.253 |
| -0.48635 | 532.88 | -0.257 | 532.03 | -0.253 |
| -0.46522 | 533.05 | -0.256 | 532.2  | -0.254 |
| -0.43909 | 533.22 | -0.256 | 532.37 | -0.254 |
| -0.46713 | 533.39 | -0.254 | 532.54 | -0.254 |
| -0.46983 | 533.55 | -0.252 | 532.71 | -0.254 |
| -0.4657  | 533.72 | -0.251 | 532.88 | -0.254 |
| -0.46209 | 533.89 | -0.249 | 533.05 | -0.254 |
| -0.47414 | 534.06 | -0.249 | 533.22 | -0.254 |
| -0.49905 | 534.23 | -0.247 | 533.39 | -0.254 |
| -0.45072 | 534.4  | -0.246 | 533.56 | -0.254 |
| -0.4467  | 534.57 | -0.245 | 533.73 | -0.254 |
| -0.46774 | 534.74 | -0.243 | 533.9  | -0.254 |
| -0.49668 | 534.91 | -0.242 | 534.06 | -0.254 |
| -0.509   | 535.08 | -0.242 | 534.23 | -0.254 |
| -0.46684 | 535.25 | -0.242 | 534.4  | -0.254 |
| -0.48011 | 535.42 | -0.243 | 534.57 | -0.254 |
| -0.47234 | 535.58 | -0.243 | 534.74 | -0.254 |
| -0.49035 | 535.75 | -0.243 | 534.91 | -0.253 |
| -0.45923 | 535.92 | -0.243 | 535.08 | -0.253 |
| -0.41946 | 536.09 | -0.243 | 535.25 | -0.252 |
| -0.37145 | 536.26 | -0.242 | 535.42 | -0.252 |
| -0.38905 | 536.43 | -0.242 | 535.59 | -0.251 |
| -0.42012 | 536.6  | -0.241 | 535.75 | -0.25  |
| -0.46435 | 536.77 | -0.24  | 535.92 | -0.25  |
| -0.43928 | 536.94 | -0.239 | 536.09 | -0.249 |
| -0.4252  | 537.11 | -0.237 | 536.26 | -0.248 |
| -0.38121 | 537.28 | -0.235 | 536.43 | -0.247 |
| -0.37855 | 537.44 | -0.232 | 536.6  | -0.246 |
| -0.40339 | 537.61 | -0.229 | 536.77 | -0.245 |
| -0.42209 | 537.78 | -0.227 | 536.94 | -0.244 |
| -0.40791 | 537.95 | -0.225 | 537.11 | -0.243 |
| -0.35673 | 538.12 | -0.222 | 537.28 | -0.242 |
| -0.33537 | 538.29 | -0.22  | 537.45 | -0.241 |
| -0.35801 | 538.46 | -0.217 | 537.61 | -0.24  |
| -0.39376 | 538.63 | -0.217 | 537.78 | -0.239 |
| -0.40477 | 538.8  | -0.218 | 537.95 | -0.238 |
| -0.37863 | 538.97 | -0.219 | 538.12 | -0.237 |
| -0.33647 | 539.14 | -0.219 | 538.29 | -0.236 |
| -0.33408 | 539.31 | -0.22  | 538.46 | -0.235 |
| -0.39019 | 539.47 | -0.22  | 538.63 | -0.235 |
| -0.42813 | 539.64 | -0.221 | 538.8  | -0.234 |
| -0.44064 | 539.81 | -0.221 | 538.97 | -0.234 |
| -0.39932 | 539.98 | -0.221 | 539.14 | -0.234 |
| -0.35143 | 540.15 | -0.221 | 539.31 | -0.234 |

|          |        |        |        |        |
|----------|--------|--------|--------|--------|
| -0.33325 | 540.32 | -0.219 | 539.48 | -0.234 |
| -0.29748 | 540.49 | -0.218 | 539.64 | -0.234 |
| -0.30593 | 540.66 | -0.216 | 539.81 | -0.234 |
| -0.32568 | 540.83 | -0.214 | 539.98 | -0.235 |
| -0.37311 | 541    | -0.212 | 540.15 | -0.236 |
| -0.39086 | 541.17 | -0.21  | 540.32 | -0.236 |
| -0.38665 | 541.34 | -0.21  | 540.49 | -0.237 |
| -0.34458 | 541.5  | -0.21  | 540.66 | -0.238 |
| -0.34394 | 541.67 | -0.21  | 540.83 | -0.239 |
| -0.30654 | 541.84 | -0.21  | 541    | -0.24  |
| -0.31187 | 542.01 | -0.21  | 541.17 | -0.241 |
| -0.32039 | 542.18 | -0.209 | 541.34 | -0.243 |
| -0.3404  | 542.35 | -0.208 | 541.5  | -0.244 |
| -0.34379 | 542.52 | -0.208 | 541.67 | -0.245 |
| -0.32226 | 542.69 | -0.207 | 541.84 | -0.246 |
| -0.31565 | 542.86 | -0.207 | 542.01 | -0.247 |
| -0.29112 | 543.03 | -0.206 | 542.18 | -0.249 |
| -0.29218 | 543.2  | -0.205 | 542.35 | -0.25  |
| -0.2918  | 543.37 | -0.205 | 542.52 | -0.251 |
| -0.31516 | 543.54 | -0.206 | 542.69 | -0.252 |
| -0.29886 | 543.7  | -0.206 | 542.86 | -0.253 |
| -0.27406 | 543.87 | -0.205 | 543.03 | -0.255 |
| -0.29039 | 544.04 | -0.204 | 543.2  | -0.256 |
| -0.33646 | 544.21 | -0.203 | 543.36 | -0.256 |
| -0.37216 | 544.38 | -0.203 | 543.53 | -0.257 |
| -0.36463 | 544.55 | -0.203 | 543.7  | -0.258 |
| -0.3162  | 544.72 | -0.201 | 543.87 | -0.259 |
| -0.30965 | 544.89 | -0.2   | 544.04 | -0.259 |
| -0.2897  | 545.06 | -0.198 | 544.21 | -0.26  |
| -0.29004 | 545.23 | -0.198 | 544.38 | -0.26  |
| -0.2954  | 545.4  | -0.197 | 544.55 | -0.26  |
| -0.2992  | 545.57 | -0.196 | 544.72 | -0.26  |
| -0.29108 | 545.73 | -0.195 | 544.89 | -0.261 |
| -0.2577  | 545.9  | -0.196 | 545.05 | -0.261 |
| -0.26898 | 546.07 | -0.197 | 545.22 | -0.261 |
| -0.29408 | 546.24 | -0.198 | 545.39 | -0.261 |
| -0.32822 | 546.41 | -0.199 | 545.56 | -0.261 |
| -0.33111 | 546.58 | -0.2   | 545.73 | -0.261 |
| -0.3372  | 546.75 | -0.2   | 545.9  | -0.261 |
| -0.30814 | 546.92 | -0.2   | 546.07 | -0.261 |
| -0.29061 | 547.09 | -0.201 | 546.24 | -0.261 |
| -0.26338 | 547.26 | -0.2   | 546.41 | -0.261 |
| -0.26173 | 547.43 | -0.2   | 546.58 | -0.262 |
| -0.26159 | 547.6  | -0.2   | 546.75 | -0.262 |
| -0.27516 | 547.77 | -0.2   | 546.92 | -0.262 |
| -0.29045 | 547.93 | -0.202 | 547.09 | -0.262 |
| -0.28462 | 548.1  | -0.203 | 547.25 | -0.262 |
| -0.25898 | 548.27 | -0.204 | 547.42 | -0.262 |
| -0.25168 | 548.44 | -0.205 | 547.59 | -0.262 |
| -0.2849  | 548.61 | -0.207 | 547.76 | -0.262 |
| -0.31497 | 548.78 | -0.207 | 547.93 | -0.262 |
| -0.29943 | 548.95 | -0.208 | 548.1  | -0.262 |
| -0.26518 | 549.12 | -0.209 | 548.27 | -0.262 |
| -0.25954 | 549.29 | -0.209 | 548.44 | -0.262 |

|          |        |        |        |        |
|----------|--------|--------|--------|--------|
| -0.27644 | 549.46 | -0.209 | 548.61 | -0.261 |
| -0.28963 | 549.63 | -0.209 | 548.78 | -0.261 |
| -0.28769 | 549.8  | -0.209 | 548.95 | -0.261 |
| -0.25047 | 549.96 | -0.207 | 549.12 | -0.261 |
| -0.22207 | 550.13 | -0.204 | 549.29 | -0.261 |
| -0.22222 | 550.3  | -0.202 | 549.45 | -0.26  |
| -0.24045 | 550.47 | -0.2   | 549.62 | -0.26  |
| -0.25573 | 550.64 | -0.199 | 549.79 | -0.26  |
| -0.2495  | 550.81 | -0.198 | 549.96 | -0.259 |
| -0.23108 | 550.98 | -0.199 | 550.13 | -0.259 |
| -0.20326 | 551.15 | -0.2   | 550.3  | -0.258 |
| -0.1824  | 551.32 | -0.2   | 550.47 | -0.257 |
| -0.1856  | 551.49 | -0.201 | 550.64 | -0.257 |
| -0.20297 | 551.65 | -0.202 | 550.81 | -0.256 |
| -0.22566 | 551.82 | -0.202 | 550.98 | -0.256 |
| -0.26153 | 551.99 | -0.201 | 551.15 | -0.255 |
| -0.26495 | 552.16 | -0.2   | 551.32 | -0.255 |
| -0.26717 | 552.33 | -0.199 | 551.49 | -0.254 |
| -0.2537  | 552.5  | -0.199 | 551.65 | -0.254 |
| -0.24316 | 552.67 | -0.198 | 551.82 | -0.253 |
| -0.2357  | 552.84 | -0.198 | 551.99 | -0.253 |
| -0.24272 | 553.01 | -0.197 | 552.16 | -0.252 |
| -0.27083 | 553.18 | -0.195 | 552.33 | -0.252 |
| -0.27321 | 553.35 | -0.194 | 552.5  | -0.252 |
| -0.26239 | 553.52 | -0.194 | 552.67 | -0.252 |
| -0.2209  | 553.69 | -0.195 | 552.84 | -0.252 |
| -0.19849 | 553.86 | -0.194 | 553.01 | -0.252 |
| -0.16714 | 554.02 | -0.195 | 553.18 | -0.252 |
| -0.16799 | 554.19 | -0.195 | 553.35 | -0.252 |
| -0.15128 | 554.36 | -0.195 | 553.52 | -0.252 |
| -0.15872 | 554.53 | -0.194 | 553.69 | -0.252 |
| -0.14692 | 554.7  | -0.194 | 553.86 | -0.253 |
| -0.15235 | 554.87 | -0.194 | 554.02 | -0.253 |
| -0.15605 | 555.04 | -0.193 | 554.19 | -0.253 |
| -0.17678 | 555.21 | -0.192 | 554.36 | -0.254 |
| -0.17437 | 555.38 | -0.192 | 554.53 | -0.255 |
| -0.17306 | 555.55 | -0.193 | 554.7  | -0.255 |
| -0.15341 | 555.72 | -0.193 | 554.87 | -0.256 |
| -0.15585 | 555.89 | -0.193 | 555.04 | -0.257 |
| -0.16236 | 556.06 | -0.192 | 555.21 | -0.257 |
| -0.16315 | 556.22 | -0.192 | 555.38 | -0.258 |
| -0.16528 | 556.39 | -0.191 | 555.55 | -0.259 |
| -0.16089 | 556.56 | -0.189 | 555.72 | -0.26  |
| -0.17967 | 556.73 | -0.187 | 555.89 | -0.26  |
| -0.17957 | 556.9  | -0.184 | 556.06 | -0.261 |
| -0.16274 | 557.07 | -0.183 | 556.23 | -0.262 |
| -0.13215 | 557.24 | -0.181 | 556.39 | -0.262 |
| -0.12598 | 557.41 | -0.179 | 556.56 | -0.263 |
| -0.14351 | 557.58 | -0.178 | 556.73 | -0.263 |
| -0.15739 | 557.75 | -0.176 | 556.9  | -0.263 |
| -0.15206 | 557.92 | -0.175 | 557.07 | -0.263 |
| -0.12558 | 558.09 | -0.174 | 557.24 | -0.263 |
| -0.12253 | 558.26 | -0.174 | 557.41 | -0.263 |
| -0.14084 | 558.43 | -0.173 | 557.58 | -0.262 |

|          |        |        |        |        |
|----------|--------|--------|--------|--------|
| -0.16048 | 558.59 | -0.175 | 557.75 | -0.262 |
| -0.13589 | 558.76 | -0.177 | 557.92 | -0.262 |
| -0.11766 | 558.93 | -0.18  | 558.09 | -0.261 |
| -0.10611 | 559.1  | -0.181 | 558.26 | -0.261 |
| -0.12005 | 559.27 | -0.181 | 558.43 | -0.261 |
| -0.11389 | 559.44 | -0.181 | 558.6  | -0.261 |
| -0.1055  | 559.61 | -0.181 | 558.77 | -0.261 |
| -0.10359 | 559.78 | -0.181 | 558.94 | -0.261 |
| -0.10219 | 559.95 | -0.182 | 559.1  | -0.261 |
| -0.09721 | 560.12 | -0.182 | 559.27 | -0.261 |
| -0.11153 | 560.29 | -0.183 | 559.44 | -0.261 |
| -0.12169 | 560.46 | -0.184 | 559.61 | -0.261 |
| -0.1299  | 560.63 | -0.185 | 559.78 | -0.261 |
| -0.11865 | 560.8  | -0.186 | 559.95 | -0.261 |
| -0.10477 | 560.97 | -0.188 | 560.12 | -0.261 |
| -0.11633 | 561.14 | -0.189 | 560.29 | -0.261 |
| -0.12416 | 561.3  | -0.189 | 560.46 | -0.261 |
| -0.13136 | 561.47 | -0.189 | 560.63 | -0.261 |
| -0.11944 | 561.64 | -0.19  | 560.8  | -0.261 |
| -0.10589 | 561.81 | -0.191 | 560.97 | -0.261 |
| -0.11306 | 561.98 | -0.192 | 561.14 | -0.262 |
| -0.13634 | 562.15 | -0.192 | 561.31 | -0.262 |
| -0.15039 | 562.32 | -0.192 | 561.48 | -0.262 |
| -0.15752 | 562.49 | -0.193 | 561.65 | -0.263 |
| -0.15745 | 562.66 | -0.193 | 561.82 | -0.263 |
| -0.17445 | 562.83 | -0.193 | 561.99 | -0.264 |
| -0.18613 | 563    | -0.193 | 562.15 | -0.264 |
| -0.19518 | 563.17 | -0.192 | 562.32 | -0.265 |
| -0.18373 | 563.34 | -0.192 | 562.49 | -0.266 |
| -0.1743  | 563.51 | -0.192 | 562.66 | -0.266 |
| -0.17112 | 563.68 | -0.193 | 562.83 | -0.267 |
| -0.16793 | 563.85 | -0.194 | 563    | -0.268 |
| -0.17164 | 564.01 | -0.195 | 563.17 | -0.268 |
| -0.15184 | 564.18 | -0.195 | 563.34 | -0.269 |
| -0.15525 | 564.35 | -0.195 | 563.51 | -0.269 |
| -0.16193 | 564.52 | -0.196 | 563.68 | -0.27  |
| -0.16295 | 564.69 | -0.196 | 563.85 | -0.27  |
| -0.16515 | 564.86 | -0.196 | 564.02 | -0.27  |
| -0.16082 | 565.03 | -0.196 | 564.19 | -0.27  |
| -0.17963 | 565.2  | -0.196 | 564.36 | -0.271 |
| -0.18021 | 565.37 | -0.197 | 564.53 | -0.271 |
| -0.15921 | 565.54 | -0.198 | 564.7  | -0.271 |
| -0.14351 | 565.71 | -0.199 | 564.87 | -0.271 |
| -0.14712 | 565.88 | -0.199 | 565.04 | -0.27  |
| -0.17787 | 566.05 | -0.2   | 565.2  | -0.27  |
| -0.16153 | 566.22 | -0.201 | 565.37 | -0.27  |
| -0.14749 | 566.39 | -0.202 | 565.54 | -0.27  |
| -0.1298  | 566.56 | -0.203 | 565.71 | -0.27  |
| -0.17454 | 566.73 | -0.204 | 565.88 | -0.269 |
| -0.19123 | 566.9  | -0.204 | 566.05 | -0.269 |
| -0.1929  | 567.06 | -0.204 | 566.22 | -0.269 |
| -0.18894 | 567.23 | -0.203 | 566.39 | -0.268 |
| -0.22033 | 567.4  | -0.202 | 566.56 | -0.268 |
| -0.23875 | 567.57 | -0.2   | 566.73 | -0.267 |



|          |        |        |        |        |
|----------|--------|--------|--------|--------|
| -0.26663 | 567.74 | -0.2   | 566.9  | -0.267 |
| -0.26793 | 567.91 | -0.2   | 567.07 | -0.267 |
| -0.27243 | 568.08 | -0.199 | 567.24 | -0.267 |
| -0.24341 | 568.25 | -0.198 | 567.41 | -0.267 |
| -0.21993 | 568.42 | -0.197 | 567.58 | -0.267 |
| -0.21573 | 568.59 | -0.195 | 567.75 | -0.267 |
| -0.19394 | 568.76 | -0.194 | 567.92 | -0.267 |
| -0.18476 | 568.93 | -0.192 | 568.09 | -0.267 |
| -0.15966 | 569.1  | -0.191 | 568.26 | -0.267 |
| -0.15944 | 569.27 | -0.19  | 568.43 | -0.268 |
| -0.16433 | 569.44 | -0.189 | 568.6  | -0.268 |
| -0.16493 | 569.61 | -0.188 | 568.77 | -0.268 |
| -0.16172 | 569.78 | -0.188 | 568.94 | -0.269 |
| -0.17678 | 569.94 | -0.189 | 569.11 | -0.269 |
| -0.18678 | 570.11 | -0.19  | 569.27 | -0.269 |
| -0.20009 | 570.28 | -0.19  | 569.44 | -0.27  |
| -0.16926 | 570.45 | -0.19  | 569.61 | -0.27  |
| -0.16409 | 570.62 | -0.191 | 569.78 | -0.271 |
| -0.16486 | 570.79 | -0.191 | 569.95 | -0.271 |
| -0.16995 | 570.96 | -0.192 | 570.12 | -0.272 |
| -0.21258 | 571.13 | -0.191 | 570.29 | -0.273 |
| -0.22909 | 571.3  | -0.191 | 570.46 | -0.274 |
| -0.27874 | 571.47 | -0.191 | 570.63 | -0.274 |
| -0.27737 | 571.64 | -0.192 | 570.8  | -0.275 |
| -0.27641 | 571.81 | -0.193 | 570.97 | -0.276 |
| -0.24178 | 571.98 | -0.193 | 571.14 | -0.277 |
| -0.23665 | 572.15 | -0.193 | 571.31 | -0.278 |
| -0.2234  | 572.32 | -0.193 | 571.48 | -0.279 |
| -0.21474 | 572.49 | -0.193 | 571.65 | -0.28  |
| -0.19079 | 572.66 | -0.193 | 571.82 | -0.281 |
| -0.19654 | 572.83 | -0.193 | 571.99 | -0.282 |
| -0.1793  | 573    | -0.194 | 572.16 | -0.283 |
| -0.19525 | 573.17 | -0.194 | 572.33 | -0.284 |
| -0.2202  | 573.34 | -0.195 | 572.5  | -0.285 |
| -0.27084 | 573.51 | -0.196 | 572.67 | -0.286 |
| -0.28662 | 573.68 | -0.197 | 572.84 | -0.287 |
| -0.2926  | 573.84 | -0.198 | 573.01 | -0.287 |
| -0.28601 | 574.01 | -0.198 | 573.18 | -0.288 |
| -0.26566 | 574.18 | -0.198 | 573.35 | -0.288 |
| -0.23671 | 574.35 | -0.199 | 573.52 | -0.289 |
| -0.22022 | 574.52 | -0.199 | 573.69 | -0.289 |
| -0.2035  | 574.69 | -0.199 | 573.86 | -0.289 |
| -0.22804 | 574.86 | -0.199 | 574.03 | -0.289 |
| -0.24686 | 575.03 | -0.199 | 574.2  | -0.289 |
| -0.25719 | 575.2  | -0.198 | 574.37 | -0.29  |
| -0.2524  | 575.37 | -0.198 | 574.54 | -0.29  |
| -0.22399 | 575.54 | -0.197 | 574.71 | -0.289 |
| -0.23061 | 575.71 | -0.196 | 574.88 | -0.289 |
| -0.21067 | 575.88 | -0.195 | 575.05 | -0.289 |
| -0.23786 | 576.05 | -0.194 | 575.22 | -0.289 |
| -0.22703 | 576.22 | -0.194 | 575.39 | -0.289 |
| -0.21107 | 576.39 | -0.194 | 575.56 | -0.289 |
| -0.20339 | 576.56 | -0.194 | 575.73 | -0.289 |
| -0.21358 | 576.73 | -0.194 | 575.89 | -0.29  |

|          |        |        |        |        |
|----------|--------|--------|--------|--------|
| -0.22935 | 576.9  | -0.194 | 576.06 | -0.29  |
| -0.20568 | 577.07 | -0.193 | 576.23 | -0.29  |
| -0.23694 | 577.24 | -0.194 | 576.4  | -0.29  |
| -0.28489 | 577.41 | -0.196 | 576.57 | -0.291 |
| -0.29908 | 577.58 | -0.197 | 576.74 | -0.291 |
| -0.27602 | 577.75 | -0.197 | 576.91 | -0.292 |
| -0.23377 | 577.92 | -0.197 | 577.08 | -0.293 |
| -0.24127 | 578.09 | -0.198 | 577.25 | -0.293 |
| -0.26385 | 578.26 | -0.199 | 577.42 | -0.294 |
| -0.29607 | 578.43 | -0.201 | 577.59 | -0.295 |
| -0.30238 | 578.6  | -0.201 | 577.76 | -0.295 |
| -0.29317 | 578.77 | -0.2   | 577.93 | -0.296 |
| -0.25279 | 578.94 | -0.2   | 578.1  | -0.297 |
| -0.23159 | 579.11 | -0.199 | 578.27 | -0.298 |
| -0.19772 | 579.28 | -0.199 | 578.44 | -0.298 |
| -0.20461 | 579.44 | -0.198 | 578.61 | -0.299 |
| -0.23372 | 579.61 | -0.197 | 578.78 | -0.3   |
| -0.24788 | 579.78 | -0.198 | 578.95 | -0.301 |
| -0.2562  | 579.95 | -0.198 | 579.12 | -0.302 |
| -0.25572 | 580.12 | -0.198 | 579.29 | -0.302 |
| -0.27653 | 580.29 | -0.198 | 579.46 | -0.303 |
| -0.27894 | 580.46 | -0.199 | 579.63 | -0.304 |
| -0.25439 | 580.63 | -0.198 | 579.8  | -0.304 |
| -0.25461 | 580.8  | -0.197 | 579.97 | -0.304 |
| -0.266   | 580.97 | -0.196 | 580.14 | -0.305 |
| -0.31111 | 581.14 | -0.194 | 580.31 | -0.305 |
| -0.32738 | 581.31 | -0.193 | 580.48 | -0.305 |
| -0.31744 | 581.48 | -0.193 | 580.65 | -0.304 |
| -0.29515 | 581.65 | -0.193 | 580.82 | -0.304 |
| -0.28074 | 581.82 | -0.194 | 580.99 | -0.304 |
| -0.27374 | 581.99 | -0.195 | 581.16 | -0.303 |
| -0.27376 | 582.16 | -0.196 | 581.33 | -0.303 |
| -0.25612 | 582.33 | -0.196 | 581.5  | -0.302 |
| -0.24927 | 582.5  | -0.196 | 581.67 | -0.301 |
| -0.22182 | 582.67 | -0.195 | 581.84 | -0.301 |
| -0.2342  | 582.84 | -0.195 | 582.01 | -0.3   |
| -0.25639 | 583.01 | -0.195 | 582.18 | -0.299 |
| -0.30577 | 583.18 | -0.195 | 582.35 | -0.298 |
| -0.32075 | 583.35 | -0.195 | 582.52 | -0.298 |
| -0.32632 | 583.52 | -0.193 | 582.69 | -0.297 |
| -0.32147 | 583.69 | -0.192 | 582.86 | -0.296 |
| -0.28845 | 583.86 | -0.192 | 583.03 | -0.295 |
| -0.30343 | 584.03 | -0.193 | 583.2  | -0.295 |
| -0.32171 | 584.2  | -0.194 | 583.37 | -0.294 |
| -0.31941 | 584.37 | -0.195 | 583.54 | -0.294 |
| -0.28313 | 584.54 | -0.196 | 583.71 | -0.293 |
| -0.25419 | 584.71 | -0.196 | 583.88 | -0.293 |
| -0.25872 | 584.88 | -0.197 | 584.05 | -0.293 |
| -0.26412 | 585.05 | -0.196 | 584.22 | -0.293 |
| -0.25517 | 585.22 | -0.196 | 584.39 | -0.293 |
| -0.29426 | 585.39 | -0.197 | 584.56 | -0.293 |
| -0.28635 | 585.56 | -0.198 | 584.73 | -0.294 |
| -0.27766 | 585.73 | -0.199 | 584.9  | -0.295 |
| -0.25776 | 585.9  | -0.199 | 585.07 | -0.295 |

|          |        |        |        |        |
|----------|--------|--------|--------|--------|
| -0.24939 | 586.07 | -0.199 | 585.24 | -0.296 |
| -0.28984 | 586.24 | -0.199 | 585.4  | -0.297 |
| -0.29194 | 586.41 | -0.201 | 585.57 | -0.299 |
| -0.31439 | 586.58 | -0.203 | 585.74 | -0.3   |
| -0.29442 | 586.75 | -0.204 | 585.91 | -0.301 |
| -0.28662 | 586.92 | -0.203 | 586.08 | -0.303 |
| -0.31192 | 587.09 | -0.202 | 586.25 | -0.304 |
| -0.30646 | 587.26 | -0.201 | 586.42 | -0.306 |
| -0.31043 | 587.43 | -0.201 | 586.59 | -0.308 |
| -0.27198 | 587.6  | -0.201 | 586.76 | -0.309 |
| -0.27404 | 587.77 | -0.2   | 586.93 | -0.311 |
| -0.30226 | 587.94 | -0.2   | 587.1  | -0.312 |
| -0.31528 | 588.11 | -0.2   | 587.27 | -0.314 |
| -0.3232  | 588.28 | -0.199 | 587.44 | -0.316 |
| -0.32241 | 588.45 | -0.199 | 587.61 | -0.317 |
| -0.34241 | 588.62 | -0.199 | 587.78 | -0.319 |
| -0.34824 | 588.79 | -0.199 | 587.95 | -0.32  |
| -0.31294 | 588.96 | -0.198 | 588.12 | -0.321 |
| -0.28714 | 589.13 | -0.198 | 588.29 | -0.323 |
| -0.28322 | 589.3  | -0.198 | 588.46 | -0.324 |
| -0.32106 | 589.47 | -0.2   | 588.63 | -0.325 |
| -0.33215 | 589.64 | -0.202 | 588.8  | -0.326 |
| -0.32469 | 589.81 | -0.203 | 588.97 | -0.326 |
| -0.28197 | 589.98 | -0.204 | 589.14 | -0.327 |
| -0.27126 | 590.15 | -0.204 | 589.31 | -0.328 |
| -0.26655 | 590.32 | -0.202 | 589.48 | -0.328 |
| -0.28237 | 590.49 | -0.201 | 589.65 | -0.329 |
| -0.27796 | 590.66 | -0.199 | 589.82 | -0.329 |
| -0.27029 | 590.83 | -0.197 | 589.99 | -0.329 |
| -0.26887 | 591    | -0.195 | 590.16 | -0.329 |
| -0.26705 | 591.17 | -0.195 | 590.33 | -0.33  |
| -0.26773 | 591.34 | -0.196 | 590.5  | -0.33  |
| -0.25822 | 591.51 | -0.196 | 590.67 | -0.33  |
| -0.29194 | 591.68 | -0.196 | 590.84 | -0.33  |
| -0.29844 | 591.85 | -0.197 | 591.01 | -0.33  |
| -0.30118 | 592.02 | -0.198 | 591.18 | -0.33  |
| -0.28047 | 592.19 | -0.199 | 591.35 | -0.33  |
| -0.29545 | 592.36 | -0.201 | 591.52 | -0.33  |
| -0.32449 | 592.53 | -0.202 | 591.69 | -0.33  |
| -0.35519 | 592.7  | -0.202 | 591.86 | -0.33  |
| -0.37808 | 592.87 | -0.201 | 592.03 | -0.329 |
| -0.38018 | 593.04 | -0.201 | 592.2  | -0.329 |
| -0.34935 | 593.21 | -0.201 | 592.37 | -0.329 |
| -0.31176 | 593.38 | -0.201 | 592.54 | -0.329 |
| -0.2868  | 593.55 | -0.201 | 592.71 | -0.329 |
| -0.29087 | 593.72 | -0.202 | 592.88 | -0.329 |
| -0.29499 | 593.89 | -0.202 | 593.05 | -0.329 |
| -0.29994 | 594.06 | -0.202 | 593.23 | -0.329 |
| -0.28683 | 594.23 | -0.202 | 593.4  | -0.329 |
| -0.27259 | 594.4  | -0.202 | 593.57 | -0.33  |
| -0.2794  | 594.57 | -0.201 | 593.74 | -0.33  |
| -0.30047 | 594.74 | -0.2   | 593.91 | -0.33  |
| -0.32628 | 594.91 | -0.198 | 594.08 | -0.331 |
| -0.29286 | 595.08 | -0.196 | 594.25 | -0.331 |

|          |        |        |        |        |
|----------|--------|--------|--------|--------|
| -0.24656 | 595.25 | -0.195 | 594.42 | -0.331 |
| -0.22863 | 595.42 | -0.193 | 594.59 | -0.331 |
| -0.26388 | 595.59 | -0.191 | 594.76 | -0.332 |
| -0.32307 | 595.76 | -0.192 | 594.93 | -0.332 |
| -0.36418 | 595.93 | -0.193 | 595.1  | -0.332 |
| -0.35903 | 596.1  | -0.195 | 595.27 | -0.332 |
| -0.32078 | 596.27 | -0.196 | 595.44 | -0.333 |
| -0.2849  | 596.44 | -0.198 | 595.61 | -0.333 |
| -0.24818 | 596.61 | -0.199 | 595.78 | -0.333 |
| -0.22271 | 596.78 | -0.199 | 595.95 | -0.333 |
| -0.21956 | 596.95 | -0.199 | 596.12 | -0.334 |
| -0.24469 | 597.12 | -0.199 | 596.29 | -0.334 |
| -0.30216 | 597.29 | -0.199 | 596.46 | -0.334 |
| -0.3147  | 597.46 | -0.199 | 596.63 | -0.335 |
| -0.33334 | 597.63 | -0.2   | 596.8  | -0.335 |
| -0.34887 | 597.8  | -0.201 | 596.97 | -0.336 |
| -0.35703 | 597.97 | -0.2   | 597.14 | -0.336 |
| -0.35911 | 598.14 | -0.2   | 597.31 | -0.337 |
| -0.3061  | 598.31 | -0.199 | 597.48 | -0.338 |
| -0.26772 | 598.48 | -0.199 | 597.65 | -0.338 |
| -0.2564  | 598.65 | -0.2   | 597.82 | -0.339 |
| -0.29224 | 598.82 | -0.201 | 597.99 | -0.34  |
| -0.3615  | 598.99 | -0.202 | 598.16 | -0.34  |
| -0.37289 | 599.16 | -0.203 | 598.33 | -0.341 |
| -0.35088 | 599.33 | -0.204 | 598.5  | -0.342 |
| -0.28606 | 599.5  | -0.205 | 598.67 | -0.342 |
| -0.24448 | 599.67 | -0.208 | 598.84 | -0.343 |
| -0.2232  | 599.84 | -0.209 | 599.01 | -0.343 |
| -0.21826 | 600.01 | -0.209 | 599.18 | -0.344 |
| -0.25017 | 600.18 | -0.21  | 599.35 | -0.344 |
| -0.27878 | 600.35 | -0.211 | 599.52 | -0.345 |
| -0.33334 | 600.52 | -0.212 | 599.69 | -0.345 |
| -0.35064 | 600.69 | -0.212 | 599.86 | -0.345 |
| -0.35838 | 600.86 | -0.212 | 600.03 | -0.346 |
| -0.34813 | 601.03 | -0.212 | 600.2  | -0.346 |
| -0.34099 | 601.2  | -0.211 | 600.37 | -0.346 |
| -0.33585 | 601.37 | -0.21  | 600.54 | -0.346 |
| -0.279   | 601.54 | -0.209 | 600.71 | -0.346 |
| -0.23343 | 601.72 | -0.209 | 600.88 | -0.346 |
| -0.23849 | 601.89 | -0.209 | 601.05 | -0.346 |
| -0.27815 | 602.06 | -0.209 | 601.22 | -0.346 |
| -0.31031 | 602.23 | -0.21  | 601.39 | -0.346 |
| -0.30013 | 602.4  | -0.21  | 601.56 | -0.346 |
| -0.25676 | 602.57 | -0.209 | 601.73 | -0.346 |
| -0.22283 | 602.74 | -0.209 | 601.9  | -0.346 |
| -0.23325 | 602.91 | -0.21  | 602.07 | -0.346 |
| -0.26901 | 603.08 | -0.211 | 602.24 | -0.346 |
| -0.32336 | 603.25 | -0.212 | 602.41 | -0.346 |
| -0.36958 | 603.42 | -0.213 | 602.58 | -0.346 |
| -0.34392 | 603.59 | -0.214 | 602.75 | -0.347 |
| -0.31618 | 603.76 | -0.215 | 602.92 | -0.347 |
| -0.25608 | 603.93 | -0.216 | 603.09 | -0.347 |
| -0.26339 | 604.1  | -0.217 | 603.27 | -0.348 |
| -0.30093 | 604.27 | -0.218 | 603.44 | -0.348 |

|          |        |        |        |        |
|----------|--------|--------|--------|--------|
| -0.30326 | 604.44 | -0.217 | 603.61 | -0.349 |
| -0.29565 | 604.61 | -0.215 | 603.78 | -0.35  |
| -0.24948 | 604.78 | -0.213 | 603.95 | -0.351 |
| -0.2364  | 604.95 | -0.211 | 604.12 | -0.351 |
| -0.3025  | 605.12 | -0.21  | 604.29 | -0.353 |
| -0.35988 | 605.29 | -0.209 | 604.46 | -0.354 |
| -0.40481 | 605.46 | -0.209 | 604.63 | -0.355 |
| -0.37551 | 605.63 | -0.209 | 604.8  | -0.356 |
| -0.2924  | 605.8  | -0.209 | 604.97 | -0.358 |
| -0.2603  | 605.97 | -0.209 | 605.14 | -0.359 |
| -0.25118 | 606.14 | -0.21  | 605.31 | -0.361 |
| -0.30132 | 606.31 | -0.211 | 605.48 | -0.362 |
| -0.32279 | 606.48 | -0.212 | 605.65 | -0.364 |
| -0.31755 | 606.65 | -0.213 | 605.82 | -0.365 |
| -0.28662 | 606.82 | -0.213 | 605.99 | -0.367 |
| -0.24323 | 606.99 | -0.213 | 606.16 | -0.368 |
| -0.23467 | 607.16 | -0.212 | 606.33 | -0.37  |
| -0.23623 | 607.33 | -0.211 | 606.5  | -0.372 |
| -0.29387 | 607.5  | -0.21  | 606.67 | -0.373 |
| -0.31466 | 607.67 | -0.208 | 606.84 | -0.375 |
| -0.32902 | 607.84 | -0.207 | 607.02 | -0.376 |
| -0.2936  | 608.01 | -0.206 | 607.19 | -0.377 |
| -0.31459 | 608.18 | -0.206 | 607.36 | -0.379 |
| -0.35052 | 608.35 | -0.204 | 607.53 | -0.38  |
| -0.39076 | 608.52 | -0.205 | 607.7  | -0.381 |
| -0.39073 | 608.69 | -0.206 | 607.87 | -0.382 |
| -0.353   | 608.86 | -0.207 | 608.04 | -0.383 |
| -0.31527 | 609.03 | -0.208 | 608.21 | -0.383 |
| -0.28458 | 609.2  | -0.208 | 608.38 | -0.384 |
| -0.30307 | 609.38 | -0.207 | 608.55 | -0.384 |
| -0.31855 | 609.55 | -0.206 | 608.72 | -0.385 |
| -0.32468 | 609.72 | -0.206 | 608.89 | -0.385 |
| -0.31971 | 609.89 | -0.207 | 609.06 | -0.386 |
| -0.35477 | 610.06 | -0.207 | 609.23 | -0.386 |
| -0.36742 | 610.23 | -0.208 | 609.4  | -0.387 |
| -0.35176 | 610.4  | -0.208 | 609.57 | -0.387 |
| -0.33391 | 610.57 | -0.208 | 609.74 | -0.388 |
| -0.3617  | 610.74 | -0.208 | 609.91 | -0.389 |
| -0.37629 | 610.91 | -0.207 | 610.08 | -0.39  |
| -0.34497 | 611.08 | -0.208 | 610.25 | -0.39  |
| -0.2504  | 611.25 | -0.208 | 610.42 | -0.391 |
| -0.202   | 611.42 | -0.208 | 610.59 | -0.392 |
| -0.2016  | 611.59 | -0.207 | 610.76 | -0.393 |
| -0.26183 | 611.76 | -0.206 | 610.93 | -0.395 |
| -0.34246 | 611.93 | -0.206 | 611.1  | -0.396 |
| -0.37263 | 612.1  | -0.206 | 611.27 | -0.397 |
| -0.37123 | 612.27 | -0.206 | 611.44 | -0.398 |
| -0.36272 | 612.44 | -0.206 | 611.61 | -0.399 |
| -0.31729 | 612.61 | -0.205 | 611.79 | -0.4   |
| -0.3065  | 612.78 | -0.205 | 611.96 | -0.402 |
| -0.29758 | 612.95 | -0.204 | 612.13 | -0.403 |
| -0.32316 | 613.12 | -0.204 | 612.3  | -0.404 |
| -0.34871 | 613.29 | -0.205 | 612.47 | -0.405 |
| -0.34003 | 613.46 | -0.205 | 612.64 | -0.407 |

|          |        |        |        |        |
|----------|--------|--------|--------|--------|
| -0.34241 | 613.63 | -0.206 | 612.81 | -0.408 |
| -0.31594 | 613.8  | -0.207 | 612.98 | -0.409 |
| -0.27464 | 613.97 | -0.208 | 613.15 | -0.41  |
| -0.26307 | 614.14 | -0.209 | 613.32 | -0.411 |
| -0.2787  | 614.31 | -0.211 | 613.49 | -0.412 |
| -0.35548 | 614.48 | -0.211 | 613.66 | -0.414 |
| -0.35572 | 614.66 | -0.211 | 613.83 | -0.415 |
| -0.33131 | 614.83 | -0.211 | 614    | -0.416 |
| -0.29629 | 615    | -0.21  | 614.17 | -0.417 |
| -0.3063  | 615.17 | -0.209 | 614.34 | -0.418 |
| -0.3295  | 615.34 | -0.209 | 614.51 | -0.418 |
| -0.29733 | 615.51 | -0.209 | 614.69 | -0.419 |
| -0.3025  | 615.68 | -0.211 | 614.86 | -0.42  |
| -0.27321 | 615.85 | -0.211 | 615.03 | -0.42  |
| -0.26143 | 616.02 | -0.212 | 615.2  | -0.421 |
| -0.27544 | 616.19 | -0.213 | 615.37 | -0.422 |
| -0.3001  | 616.36 | -0.213 | 615.54 | -0.422 |
| -0.31214 | 616.53 | -0.214 | 615.71 | -0.423 |
| -0.32977 | 616.7  | -0.214 | 615.88 | -0.423 |
| -0.35759 | 616.87 | -0.214 | 616.05 | -0.423 |
| -0.39322 | 617.04 | -0.214 | 616.22 | -0.424 |
| -0.33393 | 617.21 | -0.214 | 616.39 | -0.424 |
| -0.32654 | 617.38 | -0.213 | 616.56 | -0.425 |
| -0.3215  | 617.55 | -0.212 | 616.73 | -0.425 |
| -0.36678 | 617.72 | -0.211 | 616.9  | -0.426 |
| -0.39407 | 617.89 | -0.21  | 617.07 | -0.426 |
| -0.36977 | 618.06 | -0.21  | 617.24 | -0.426 |
| -0.33919 | 618.23 | -0.211 | 617.41 | -0.427 |
| -0.31196 | 618.4  | -0.212 | 617.58 | -0.427 |
| -0.33556 | 618.57 | -0.212 | 617.75 | -0.427 |
| -0.34644 | 618.74 | -0.212 | 617.92 | -0.428 |
| -0.3069  | 618.92 | -0.211 | 618.1  | -0.428 |
| -0.3005  | 619.09 | -0.21  | 618.27 | -0.429 |
| -0.29729 | 619.26 | -0.21  | 618.44 | -0.429 |
| -0.31427 | 619.43 | -0.21  | 618.61 | -0.43  |
| -0.30973 | 619.6  | -0.21  | 618.78 | -0.431 |
| -0.30724 | 619.77 | -0.21  | 618.95 | -0.432 |
| -0.2856  | 619.94 | -0.21  | 619.12 | -0.433 |
| -0.29802 | 620.11 | -0.21  | 619.29 | -0.434 |
| -0.26201 | 620.28 | -0.21  | 619.46 | -0.435 |
| -0.28781 | 620.45 | -0.211 | 619.63 | -0.436 |
| -0.29605 | 620.62 | -0.211 | 619.8  | -0.437 |
| -0.37153 | 620.79 | -0.211 | 619.97 | -0.438 |
| -0.38595 | 620.96 | -0.211 | 620.14 | -0.439 |
| -0.41553 | 621.13 | -0.211 | 620.31 | -0.44  |
| -0.36662 | 621.3  | -0.211 | 620.48 | -0.441 |
| -0.35711 | 621.47 | -0.21  | 620.65 | -0.442 |
| -0.29368 | 621.64 | -0.21  | 620.82 | -0.443 |
| -0.31923 | 621.81 | -0.21  | 620.99 | -0.445 |
| -0.32559 | 621.98 | -0.209 | 621.17 | -0.446 |
| -0.35519 | 622.15 | -0.208 | 621.34 | -0.447 |
| -0.36072 | 622.33 | -0.208 | 621.51 | -0.448 |
| -0.37671 | 622.5  | -0.208 | 621.68 | -0.449 |
| -0.37537 | 622.67 | -0.208 | 621.85 | -0.45  |

|          |        |        |        |        |
|----------|--------|--------|--------|--------|
| -0.36835 | 622.84 | -0.207 | 622.02 | -0.452 |
| -0.36767 | 623.01 | -0.207 | 622.19 | -0.453 |
| -0.3648  | 623.18 | -0.207 | 622.36 | -0.454 |
| -0.37272 | 623.35 | -0.207 | 622.53 | -0.455 |
| -0.34189 | 623.52 | -0.206 | 622.7  | -0.456 |
| -0.32636 | 623.69 | -0.205 | 622.87 | -0.457 |
| -0.2869  | 623.86 | -0.205 | 623.04 | -0.459 |
| -0.32632 | 624.03 | -0.204 | 623.21 | -0.46  |
| -0.36744 | 624.2  | -0.203 | 623.38 | -0.461 |
| -0.43563 | 624.37 | -0.202 | 623.54 | -0.462 |
| -0.41868 | 624.54 | -0.202 | 623.72 | -0.463 |
| -0.37287 | 624.71 | -0.202 | 623.88 | -0.464 |
| -0.30161 | 624.88 | -0.202 | 624.05 | -0.465 |
| -0.24171 | 625.05 | -0.203 | 624.22 | -0.466 |
| -0.25727 | 625.22 | -0.205 | 624.39 | -0.466 |
| -0.30147 | 625.39 | -0.207 | 624.56 | -0.467 |
| -0.34627 | 625.55 | -0.208 | 624.73 | -0.467 |
| -0.36971 | 625.72 | -0.209 | 624.9  | -0.467 |
| -0.31668 | 625.89 | -0.208 | 625.07 | -0.467 |
| -0.32668 | 626.06 | -0.207 | 625.24 | -0.467 |
| -0.29353 | 626.23 | -0.207 | 625.41 | -0.467 |
| -0.32439 | 626.4  | -0.207 | 625.58 | -0.466 |
| -0.32162 | 626.57 | -0.208 | 625.75 | -0.466 |
| -0.30633 | 626.74 | -0.209 | 625.92 | -0.465 |
| -0.3067  | 626.91 | -0.208 | 626.09 | -0.465 |
| -0.29012 | 627.08 | -0.208 | 626.26 | -0.464 |
| -0.33796 | 627.25 | -0.207 | 626.43 | -0.463 |
| -0.35483 | 627.42 | -0.208 | 626.6  | -0.463 |
| -0.36147 | 627.59 | -0.209 | 626.77 | -0.462 |
| -0.34361 | 627.76 | -0.21  | 626.94 | -0.461 |
| -0.35862 | 627.93 | -0.21  | 627.11 | -0.461 |
| -0.39553 | 628.1  | -0.21  | 627.28 | -0.46  |
| -0.40525 | 628.27 | -0.209 | 627.45 | -0.46  |
| -0.37776 | 628.44 | -0.208 | 627.62 | -0.46  |
| -0.34169 | 628.61 | -0.207 | 627.78 | -0.46  |
| -0.32202 | 628.78 | -0.207 | 627.95 | -0.46  |
| -0.3112  | 628.94 | -0.207 | 628.12 | -0.46  |
| -0.31008 | 629.11 | -0.207 | 628.29 | -0.46  |
| -0.28845 | 629.28 | -0.206 | 628.46 | -0.461 |
| -0.28689 | 629.45 | -0.207 | 628.63 | -0.461 |
| -0.30215 | 629.62 | -0.208 | 628.8  | -0.461 |
| -0.3364  | 629.79 | -0.209 | 628.97 | -0.462 |
| -0.3274  | 629.96 | -0.21  | 629.14 | -0.462 |
| -0.29862 | 630.13 | -0.211 | 629.31 | -0.463 |
| -0.28044 | 630.3  | -0.211 | 629.48 | -0.464 |
| -0.28332 | 630.47 | -0.212 | 629.65 | -0.465 |
| -0.30415 | 630.64 | -0.212 | 629.82 | -0.465 |
| -0.3205  | 630.81 | -0.212 | 629.99 | -0.466 |
| -0.31699 | 630.98 | -0.212 | 630.16 | -0.467 |
| -0.28771 | 631.15 | -0.213 | 630.33 | -0.468 |
| -0.29575 | 631.32 | -0.214 | 630.49 | -0.469 |
| -0.34026 | 631.49 | -0.215 | 630.66 | -0.47  |
| -0.37466 | 631.66 | -0.215 | 630.83 | -0.471 |
| -0.36224 | 631.82 | -0.215 | 631    | -0.472 |

|          |        |        |        |        |
|----------|--------|--------|--------|--------|
| -0.32816 | 631.99 | -0.215 | 631.17 | -0.473 |
| -0.3318  | 632.16 | -0.216 | 631.34 | -0.474 |
| -0.32007 | 632.33 | -0.216 | 631.51 | -0.476 |
| -0.30917 | 632.5  | -0.217 | 631.68 | -0.477 |
| -0.30132 | 632.67 | -0.218 | 631.85 | -0.478 |
| -0.3125  | 632.84 | -0.219 | 632.02 | -0.48  |
| -0.32577 | 633.01 | -0.219 | 632.19 | -0.481 |
| -0.31905 | 633.18 | -0.22  | 632.36 | -0.482 |
| -0.2915  | 633.35 | -0.221 | 632.53 | -0.483 |
| -0.2936  | 633.52 | -0.221 | 632.7  | -0.484 |
| -0.28918 | 633.69 | -0.221 | 632.87 | -0.485 |
| -0.32255 | 633.86 | -0.219 | 633.04 | -0.486 |
| -0.33431 | 634.03 | -0.217 | 633.21 | -0.487 |
| -0.32177 | 634.2  | -0.216 | 633.38 | -0.488 |
| -0.29442 | 634.36 | -0.215 | 633.54 | -0.489 |
| -0.29042 | 634.53 | -0.214 | 633.71 | -0.49  |
| -0.30471 | 634.7  | -0.214 | 633.88 | -0.492 |
| -0.33397 | 634.87 | -0.213 | 634.05 | -0.493 |
| -0.33937 | 635.04 | -0.212 | 634.22 | -0.494 |
| -0.31943 | 635.21 | -0.211 | 634.39 | -0.495 |
| -0.31851 | 635.38 | -0.21  | 634.56 | -0.496 |
| -0.27487 | 635.55 | -0.21  | 634.73 | -0.497 |
| -0.28619 | 635.72 | -0.211 | 634.9  | -0.498 |
| -0.26546 | 635.89 | -0.212 | 635.07 | -0.499 |
| -0.32428 | 636.06 | -0.212 | 635.24 | -0.5   |
| -0.33057 | 636.23 | -0.212 | 635.41 | -0.501 |
| -0.35587 | 636.4  | -0.213 | 635.58 | -0.503 |
| -0.30148 | 636.57 | -0.214 | 635.75 | -0.504 |
| -0.295   | 636.74 | -0.216 | 635.92 | -0.505 |
| -0.28482 | 636.91 | -0.218 | 636.09 | -0.507 |
| -0.28679 | 637.07 | -0.22  | 636.26 | -0.509 |
| -0.29079 | 637.24 | -0.221 | 636.42 | -0.51  |
| -0.30658 | 637.41 | -0.221 | 636.59 | -0.512 |
| -0.31883 | 637.58 | -0.221 | 636.76 | -0.513 |
| -0.32908 | 637.75 | -0.221 | 636.93 | -0.515 |
| -0.30871 | 637.92 | -0.221 | 637.1  | -0.516 |
| -0.33322 | 638.09 | -0.219 | 637.27 | -0.518 |
| -0.3367  | 638.26 | -0.218 | 637.44 | -0.519 |
| -0.33699 | 638.43 | -0.216 | 637.61 | -0.521 |
| -0.31452 | 638.6  | -0.215 | 637.78 | -0.522 |
| -0.33165 | 638.77 | -0.214 | 637.95 | -0.523 |
| -0.3538  | 638.94 | -0.214 | 638.12 | -0.525 |
| -0.34408 | 639.11 | -0.214 | 638.29 | -0.526 |
| -0.33761 | 639.28 | -0.215 | 638.46 | -0.527 |
| -0.3347  | 639.45 | -0.216 | 638.63 | -0.528 |
| -0.33647 | 639.62 | -0.217 | 638.8  | -0.529 |
| -0.32563 | 639.79 | -0.217 | 638.97 | -0.529 |
| -0.29429 | 639.96 | -0.217 | 639.13 | -0.53  |
| -0.2978  | 640.13 | -0.216 | 639.3  | -0.53  |
| -0.2866  | 640.29 | -0.216 | 639.47 | -0.531 |
| -0.27444 | 640.46 | -0.215 | 639.64 | -0.531 |
| -0.2764  | 640.63 | -0.215 | 639.81 | -0.532 |
| -0.25015 | 640.8  | -0.215 | 639.98 | -0.532 |
| -0.26884 | 640.97 | -0.214 | 640.15 | -0.532 |



|          |        |        |        |        |
|----------|--------|--------|--------|--------|
| -0.27695 | 641.14 | -0.215 | 640.32 | -0.533 |
| -0.31515 | 641.31 | -0.215 | 640.49 | -0.533 |
| -0.33105 | 641.48 | -0.216 | 640.66 | -0.534 |
| -0.31533 | 641.65 | -0.216 | 640.83 | -0.535 |
| -0.3074  | 641.82 | -0.215 | 641    | -0.535 |
| -0.30301 | 641.99 | -0.213 | 641.17 | -0.535 |
| -0.30485 | 642.16 | -0.213 | 641.34 | -0.536 |
| -0.28875 | 642.33 | -0.213 | 641.51 | -0.536 |
| -0.27695 | 642.5  | -0.213 | 641.68 | -0.536 |
| -0.2717  | 642.67 | -0.212 | 641.85 | -0.537 |
| -0.27326 | 642.84 | -0.212 | 642.02 | -0.537 |
| -0.25262 | 643.01 | -0.212 | 642.19 | -0.538 |
| -0.25677 | 643.18 | -0.213 | 642.36 | -0.538 |
| -0.25546 | 643.35 | -0.215 | 642.53 | -0.539 |
| -0.28323 | 643.52 | -0.216 | 642.69 | -0.54  |
| -0.3134  | 643.69 | -0.216 | 642.86 | -0.541 |
| -0.3618  | 643.86 | -0.217 | 643.03 | -0.542 |
| -0.4024  | 644.03 | -0.218 | 643.2  | -0.543 |
| -0.39068 | 644.2  | -0.218 | 643.37 | -0.544 |
| -0.36726 | 644.36 | -0.217 | 643.54 | -0.545 |
| -0.33635 | 644.53 | -0.216 | 643.71 | -0.547 |
| -0.32548 | 644.7  | -0.216 | 643.88 | -0.548 |
| -0.29192 | 644.87 | -0.216 | 644.05 | -0.549 |
| -0.24588 | 645.04 | -0.216 | 644.22 | -0.55  |
| -0.23494 | 645.21 | -0.216 | 644.39 | -0.551 |
| -0.24411 | 645.38 | -0.215 | 644.56 | -0.552 |
| -0.27161 | 645.55 | -0.216 | 644.73 | -0.553 |
| -0.27066 | 645.72 | -0.216 | 644.9  | -0.555 |
| -0.27033 | 645.89 | -0.217 | 645.07 | -0.556 |
| -0.25548 | 646.06 | -0.217 | 645.24 | -0.557 |
| -0.24415 | 646.23 | -0.216 | 645.41 | -0.558 |
| -0.23559 | 646.4  | -0.215 | 645.57 | -0.56  |
| -0.24787 | 646.57 | -0.216 | 645.74 | -0.561 |
| -0.25392 | 646.74 | -0.216 | 645.91 | -0.562 |
| -0.26854 | 646.91 | -0.217 | 646.08 | -0.563 |
| -0.2929  | 647.08 | -0.217 | 646.25 | -0.563 |
| -0.32292 | 647.25 | -0.217 | 646.42 | -0.564 |
| -0.34906 | 647.42 | -0.218 | 646.59 | -0.565 |
| -0.33674 | 647.59 | -0.218 | 646.76 | -0.566 |
| -0.29041 | 647.76 | -0.219 | 646.93 | -0.566 |
| -0.26541 | 647.93 | -0.218 | 647.1  | -0.567 |
| -0.23522 | 648.1  | -0.219 | 647.27 | -0.567 |
| -0.29152 | 648.27 | -0.218 | 647.44 | -0.567 |
| -0.31134 | 648.44 | -0.219 | 647.61 | -0.568 |
| -0.33784 | 648.6  | -0.219 | 647.78 | -0.568 |
| -0.32588 | 648.77 | -0.22  | 647.95 | -0.568 |
| -0.30921 | 648.94 | -0.221 | 648.12 | -0.568 |
| -0.31112 | 649.11 | -0.222 | 648.29 | -0.568 |
| -0.28461 | 649.28 | -0.223 | 648.46 | -0.568 |
| -0.29827 | 649.45 | -0.224 | 648.63 | -0.569 |
| -0.32389 | 649.62 | -0.226 | 648.8  | -0.569 |
| -0.36658 | 649.79 | -0.226 | 648.97 | -0.569 |
| -0.34574 | 649.96 | -0.226 | 649.14 | -0.57  |
| -0.30666 | 650.13 | -0.224 | 649.31 | -0.57  |

|          |        |        |        |        |
|----------|--------|--------|--------|--------|
| -0.28937 | 650.3  | -0.224 | 649.48 | -0.571 |
| -0.27478 | 650.47 | -0.225 | 649.65 | -0.572 |
| -0.28399 | 650.64 | -0.226 | 649.82 | -0.572 |
| -0.29054 | 650.81 | -0.225 | 649.99 | -0.573 |
| -0.30133 | 650.98 | -0.224 | 650.16 | -0.574 |
| -0.27361 | 651.15 | -0.224 | 650.33 | -0.575 |
| -0.25298 | 651.32 | -0.225 | 650.5  | -0.576 |
| -0.24165 | 651.49 | -0.225 | 650.67 | -0.577 |
| -0.24654 | 651.66 | -0.225 | 650.84 | -0.578 |
| -0.26913 | 651.83 | -0.225 | 651.01 | -0.579 |
| -0.28624 | 652    | -0.224 | 651.18 | -0.58  |
| -0.28257 | 652.17 | -0.224 | 651.35 | -0.581 |
| -0.25706 | 652.34 | -0.223 | 651.52 | -0.582 |
| -0.25454 | 652.51 | -0.223 | 651.69 | -0.584 |
| -0.27448 | 652.68 | -0.223 | 651.85 | -0.585 |
| -0.28526 | 652.85 | -0.223 | 652.02 | -0.586 |
| -0.29472 | 653.02 | -0.223 | 652.19 | -0.588 |
| -0.28384 | 653.19 | -0.223 | 652.36 | -0.589 |
| -0.27095 | 653.36 | -0.223 | 652.53 | -0.59  |
| -0.27781 | 653.53 | -0.222 | 652.7  | -0.591 |
| -0.3048  | 653.7  | -0.222 | 652.87 | -0.591 |
| -0.30759 | 653.87 | -0.222 | 653.04 | -0.592 |
| -0.29297 | 654.04 | -0.224 | 653.21 | -0.593 |
| -0.26208 | 654.21 | -0.225 | 653.38 | -0.594 |
| -0.26492 | 654.38 | -0.225 | 653.55 | -0.595 |
| -0.25368 | 654.55 | -0.225 | 653.72 | -0.595 |
| -0.24271 | 654.72 | -0.225 | 653.89 | -0.596 |
| -0.23428 | 654.89 | -0.226 | 654.06 | -0.597 |
| -0.25031 | 655.06 | -0.227 | 654.23 | -0.598 |
| -0.24453 | 655.23 | -0.228 | 654.4  | -0.598 |
| -0.24359 | 655.4  | -0.228 | 654.57 | -0.599 |
| -0.21107 | 655.57 | -0.229 | 654.74 | -0.6   |
| -0.25281 | 655.74 | -0.23  | 654.91 | -0.601 |
| -0.31004 | 655.91 | -0.232 | 655.08 | -0.601 |
| -0.32785 | 656.08 | -0.233 | 655.25 | -0.602 |
| -0.30372 | 656.25 | -0.233 | 655.42 | -0.603 |
| -0.27392 | 656.42 | -0.233 | 655.59 | -0.603 |
| -0.30328 | 656.59 | -0.233 | 655.76 | -0.604 |
| -0.36057 | 656.76 | -0.232 | 655.93 | -0.605 |
| -0.39581 | 656.93 | -0.232 | 656.1  | -0.605 |
| -0.40338 | 657.1  | -0.232 | 656.27 | -0.606 |
| -0.3854  | 657.27 | -0.231 | 656.44 | -0.606 |
| -0.31532 | 657.44 | -0.23  | 656.61 | -0.607 |
| -0.28974 | 657.61 | -0.228 | 656.78 | -0.607 |
| -0.2726  | 657.78 | -0.228 | 656.95 | -0.608 |
| -0.30287 | 657.95 | -0.227 | 657.12 | -0.608 |
| -0.2909  | 658.12 | -0.227 | 657.29 | -0.609 |
| -0.28461 | 658.29 | -0.227 | 657.46 | -0.61  |
| -0.24248 | 658.46 | -0.228 | 657.63 | -0.61  |
| -0.2517  | 658.62 | -0.227 | 657.8  | -0.611 |
| -0.24014 | 658.79 | -0.227 | 657.97 | -0.612 |
| -0.26422 | 658.96 | -0.227 | 658.14 | -0.612 |
| -0.27004 | 659.13 | -0.227 | 658.31 | -0.613 |
| -0.26508 | 659.3  | -0.227 | 658.48 | -0.614 |

|          |        |        |        |        |
|----------|--------|--------|--------|--------|
| -0.26757 | 659.47 | -0.227 | 658.65 | -0.614 |
| -0.25978 | 659.64 | -0.229 | 658.82 | -0.615 |
| -0.28061 | 659.81 | -0.232 | 658.99 | -0.616 |
| -0.33596 | 659.98 | -0.235 | 659.16 | -0.616 |
| -0.35385 | 660.15 | -0.237 | 659.33 | -0.617 |
| -0.3549  | 660.32 | -0.238 | 659.5  | -0.617 |
| -0.30396 | 660.49 | -0.238 | 659.67 | -0.618 |
| -0.26877 | 660.66 | -0.239 | 659.84 | -0.619 |
| -0.25021 | 660.83 | -0.239 | 660.01 | -0.619 |
| -0.25439 | 661    | -0.239 | 660.18 | -0.62  |
| -0.26479 | 661.17 | -0.239 | 660.35 | -0.62  |
| -0.25178 | 661.34 | -0.238 | 660.52 | -0.621 |
| -0.23998 | 661.51 | -0.238 | 660.69 | -0.621 |
| -0.23933 | 661.69 | -0.238 | 660.86 | -0.621 |
| -0.28825 | 661.86 | -0.238 | 661.03 | -0.622 |
| -0.33804 | 662.03 | -0.238 | 661.2  | -0.622 |
| -0.37106 | 662.2  | -0.239 | 661.37 | -0.623 |
| -0.3634  | 662.37 | -0.239 | 661.54 | -0.623 |
| -0.32303 | 662.54 | -0.238 | 661.71 | -0.624 |
| -0.28622 | 662.71 | -0.236 | 661.88 | -0.625 |
| -0.24823 | 662.88 | -0.235 | 662.05 | -0.625 |
| -0.2273  | 663.05 | -0.234 | 662.22 | -0.626 |
| -0.20424 | 663.22 | -0.233 | 662.39 | -0.627 |
| -0.23923 | 663.39 | -0.232 | 662.56 | -0.627 |
| -0.27544 | 663.56 | -0.23  | 662.73 | -0.628 |
| -0.3275  | 663.73 | -0.228 | 662.9  | -0.629 |
| -0.35643 | 663.9  | -0.227 | 663.07 | -0.63  |
| -0.39353 | 664.07 | -0.227 | 663.24 | -0.631 |
| -0.39181 | 664.24 | -0.226 | 663.41 | -0.632 |
| -0.35808 | 664.41 | -0.226 | 663.58 | -0.632 |
| -0.29958 | 664.58 | -0.225 | 663.75 | -0.633 |
| -0.2808  | 664.75 | -0.225 | 663.92 | -0.634 |
| -0.27762 | 664.92 | -0.226 | 664.09 | -0.634 |
| -0.26294 | 665.09 | -0.228 | 664.26 | -0.635 |
| -0.29486 | 665.26 | -0.23  | 664.43 | -0.635 |
| -0.29865 | 665.43 | -0.231 | 664.6  | -0.636 |
| -0.30844 | 665.6  | -0.232 | 664.77 | -0.636 |
| -0.26239 | 665.77 | -0.232 | 664.94 | -0.636 |
| -0.23657 | 665.94 | -0.233 | 665.11 | -0.636 |
| -0.25735 | 666.11 | -0.233 | 665.28 | -0.637 |
| -0.29947 | 666.28 | -0.234 | 665.45 | -0.637 |
| -0.34655 | 666.45 | -0.233 | 665.62 | -0.637 |
| -0.36306 | 666.62 | -0.233 | 665.79 | -0.638 |
| -0.34327 | 666.79 | -0.232 | 665.96 | -0.638 |
| -0.29451 | 666.96 | -0.23  | 666.13 | -0.638 |
| -0.26555 | 667.13 | -0.229 | 666.3  | -0.639 |
| -0.24768 | 667.3  | -0.229 | 666.47 | -0.639 |
| -0.25324 | 667.47 | -0.23  | 666.64 | -0.64  |
| -0.26471 | 667.64 | -0.23  | 666.81 | -0.64  |
| -0.24788 | 667.81 | -0.231 | 666.98 | -0.641 |
| -0.25112 | 667.98 | -0.232 | 667.15 | -0.642 |
| -0.26035 | 668.15 | -0.233 | 667.32 | -0.642 |
| -0.32189 | 668.32 | -0.233 | 667.49 | -0.643 |
| -0.34632 | 668.49 | -0.23  | 667.66 | -0.644 |

|          |        |        |        |        |
|----------|--------|--------|--------|--------|
| -0.35025 | 668.66 | -0.228 | 667.84 | -0.645 |
| -0.36554 | 668.83 | -0.226 | 668.01 | -0.646 |
| -0.33688 | 669    | -0.226 | 668.18 | -0.647 |
| -0.3269  | 669.17 | -0.225 | 668.35 | -0.648 |
| -0.27639 | 669.34 | -0.225 | 668.52 | -0.649 |
| -0.29812 | 669.51 | -0.225 | 668.69 | -0.651 |
| -0.30066 | 669.68 | -0.225 | 668.86 | -0.652 |
| -0.31347 | 669.85 | -0.226 | 669.03 | -0.653 |
| -0.31091 | 670.02 | -0.228 | 669.2  | -0.655 |
| -0.303   | 670.19 | -0.228 | 669.37 | -0.657 |
| -0.3019  | 670.36 | -0.228 | 669.54 | -0.658 |
| -0.29944 | 670.53 | -0.228 | 669.71 | -0.66  |
| -0.3037  | 670.7  | -0.229 | 669.88 | -0.661 |
| -0.2835  | 670.87 | -0.229 | 670.05 | -0.662 |
| -0.29126 | 671.04 | -0.229 | 670.22 | -0.664 |
| -0.28379 | 671.21 | -0.229 | 670.39 | -0.665 |
| -0.27158 | 671.38 | -0.229 | 670.56 | -0.667 |
| -0.27195 | 671.56 | -0.229 | 670.73 | -0.668 |
| -0.31967 | 671.73 | -0.228 | 670.9  | -0.669 |
| -0.37872 | 671.9  | -0.228 | 671.07 | -0.67  |
| -0.37983 | 672.07 | -0.229 | 671.24 | -0.671 |
| -0.35372 | 672.24 | -0.231 | 671.41 | -0.672 |
| -0.35237 | 672.41 | -0.233 | 671.58 | -0.673 |
| -0.37607 | 672.58 | -0.234 | 671.75 | -0.673 |
| -0.37589 | 672.75 | -0.234 | 671.92 | -0.674 |
| -0.36368 | 672.92 | -0.235 | 672.09 | -0.674 |
| -0.32206 | 673.09 | -0.236 | 672.26 | -0.674 |
| -0.29504 | 673.26 | -0.237 | 672.43 | -0.674 |
| -0.27833 | 673.43 | -0.237 | 672.6  | -0.674 |
| -0.29015 | 673.6  | -0.237 | 672.77 | -0.674 |
| -0.27822 | 673.77 | -0.237 | 672.94 | -0.673 |
| -0.28517 | 673.94 | -0.236 | 673.11 | -0.673 |
| -0.28417 | 674.11 | -0.236 | 673.28 | -0.673 |
| -0.32483 | 674.28 | -0.236 | 673.45 | -0.672 |
| -0.31452 | 674.45 | -0.236 | 673.62 | -0.672 |
| -0.32126 | 674.62 | -0.236 | 673.79 | -0.671 |
| -0.31026 | 674.79 | -0.236 | 673.96 | -0.671 |
| -0.32301 | 674.96 | -0.237 | 674.13 | -0.671 |
| -0.3071  | 675.13 | -0.238 | 674.3  | -0.67  |
| -0.26832 | 675.31 | -0.239 | 674.47 | -0.67  |
| -0.26236 | 675.48 | -0.241 | 674.64 | -0.67  |
| -0.27465 | 675.65 | -0.241 | 674.81 | -0.67  |
| -0.29946 | 675.82 | -0.241 | 674.98 | -0.67  |
| -0.31551 | 675.99 | -0.241 | 675.16 | -0.67  |
| -0.31837 | 676.16 | -0.241 | 675.33 | -0.67  |
| -0.33708 | 676.33 | -0.241 | 675.5  | -0.67  |
| -0.35466 | 676.5  | -0.241 | 675.67 | -0.671 |
| -0.34467 | 676.67 | -0.239 | 675.84 | -0.671 |
| -0.34221 | 676.84 | -0.238 | 676.01 | -0.672 |
| -0.32081 | 677.01 | -0.238 | 676.18 | -0.672 |
| -0.32201 | 677.18 | -0.239 | 676.35 | -0.673 |
| -0.33223 | 677.35 | -0.238 | 676.52 | -0.674 |
| -0.31727 | 677.52 | -0.238 | 676.69 | -0.675 |
| -0.313   | 677.69 | -0.237 | 676.86 | -0.676 |

|          |        |        |        |        |
|----------|--------|--------|--------|--------|
| -0.28527 | 677.86 | -0.237 | 677.03 | -0.676 |
| -0.30608 | 678.03 | -0.237 | 677.2  | -0.677 |
| -0.3037  | 678.2  | -0.238 | 677.37 | -0.678 |
| -0.31335 | 678.37 | -0.239 | 677.54 | -0.679 |
| -0.31613 | 678.54 | -0.241 | 677.71 | -0.68  |
| -0.34814 | 678.71 | -0.243 | 677.88 | -0.682 |
| -0.376   | 678.88 | -0.245 | 678.05 | -0.683 |
| -0.37835 | 679.05 | -0.246 | 678.22 | -0.684 |
| -0.34923 | 679.22 | -0.246 | 678.39 | -0.685 |
| -0.30905 | 679.39 | -0.246 | 678.56 | -0.686 |
| -0.29154 | 679.56 | -0.245 | 678.73 | -0.687 |
| -0.33108 | 679.73 | -0.244 | 678.9  | -0.688 |
| -0.38425 | 679.9  | -0.244 | 679.07 | -0.689 |
| -0.38488 | 680.07 | -0.244 | 679.24 | -0.69  |
| -0.35617 | 680.25 | -0.245 | 679.41 | -0.69  |
| -0.29051 | 680.42 | -0.245 | 679.59 | -0.691 |
| -0.30315 | 680.59 | -0.246 | 679.76 | -0.692 |
| -0.31643 | 680.76 | -0.246 | 679.93 | -0.692 |
| -0.33853 | 680.93 | -0.247 | 680.1  | -0.692 |
| -0.33831 | 681.1  | -0.247 | 680.27 | -0.693 |
| -0.33705 | 681.27 | -0.247 | 680.44 | -0.693 |
| -0.32282 | 681.44 | -0.248 | 680.61 | -0.693 |
| -0.30712 | 681.61 | -0.247 | 680.78 | -0.693 |
| -0.31407 | 681.78 | -0.246 | 680.95 | -0.693 |
| -0.33189 | 681.95 | -0.246 | 681.12 | -0.692 |
| -0.36603 | 682.12 | -0.246 | 681.29 | -0.692 |
| -0.35818 | 682.29 | -0.245 | 681.46 | -0.692 |
| -0.39628 | 682.46 | -0.242 | 681.63 | -0.692 |
| -0.38242 | 682.63 | -0.241 | 681.8  | -0.692 |
| -0.33221 | 682.8  | -0.241 | 681.97 | -0.692 |
| -0.28656 | 682.98 | -0.241 | 682.14 | -0.692 |
| -0.26241 | 683.15 | -0.243 | 682.31 | -0.692 |
| -0.31014 | 683.32 | -0.244 | 682.48 | -0.692 |
| -0.31951 | 683.49 | -0.244 | 682.65 | -0.692 |
| -0.34254 | 683.66 | -0.244 | 682.82 | -0.691 |
| -0.33276 | 683.83 | -0.243 | 682.99 | -0.691 |
| -0.29793 | 684    | -0.243 | 683.17 | -0.691 |
| -0.29033 | 684.17 | -0.242 | 683.34 | -0.69  |
| -0.31303 | 684.34 | -0.241 | 683.51 | -0.69  |
| -0.37277 | 684.51 | -0.242 | 683.68 | -0.689 |
| -0.374   | 684.68 | -0.243 | 683.85 | -0.688 |
| -0.36629 | 684.85 | -0.243 | 684.02 | -0.688 |
| -0.36699 | 685.02 | -0.245 | 684.19 | -0.687 |
| -0.36558 | 685.19 | -0.247 | 684.36 | -0.686 |
| -0.36544 | 685.36 | -0.248 | 684.53 | -0.686 |
| -0.36447 | 685.53 | -0.249 | 684.7  | -0.685 |
| -0.36856 | 685.71 | -0.248 | 684.87 | -0.684 |
| -0.35359 | 685.88 | -0.248 | 685.04 | -0.684 |
| -0.34246 | 686.05 | -0.247 | 685.21 | -0.683 |
| -0.33757 | 686.22 | -0.249 | 685.38 | -0.683 |
| -0.33934 | 686.39 | -0.25  | 685.55 | -0.682 |
| -0.32081 | 686.56 | -0.251 | 685.72 | -0.682 |
| -0.31182 | 686.73 | -0.252 | 685.89 | -0.681 |
| -0.35872 | 686.9  | -0.253 | 686.07 | -0.681 |

|          |        |        |        |        |
|----------|--------|--------|--------|--------|
| -0.4071  | 687.07 | -0.253 | 686.24 | -0.681 |
| -0.43711 | 687.24 | -0.251 | 686.41 | -0.681 |
| -0.43122 | 687.41 | -0.249 | 686.58 | -0.681 |
| -0.44567 | 687.58 | -0.247 | 686.75 | -0.681 |
| -0.44837 | 687.75 | -0.246 | 686.92 | -0.682 |
| -0.42361 | 687.92 | -0.246 | 687.09 | -0.682 |
| -0.35551 | 688.1  | -0.246 | 687.26 | -0.683 |
| -0.31471 | 688.27 | -0.247 | 687.43 | -0.684 |
| -0.27867 | 688.44 | -0.248 | 687.6  | -0.685 |
| -0.32699 | 688.61 | -0.249 | 687.77 | -0.686 |
| -0.35399 | 688.78 | -0.249 | 687.94 | -0.687 |
| -0.41483 | 688.95 | -0.25  | 688.11 | -0.689 |
| -0.378   | 689.12 | -0.25  | 688.28 | -0.69  |
| -0.38612 | 689.29 | -0.25  | 688.46 | -0.691 |
| -0.36047 | 689.46 | -0.251 | 688.63 | -0.693 |
| -0.38118 | 689.63 | -0.251 | 688.8  | -0.694 |
| -0.35333 | 689.8  | -0.253 | 688.97 | -0.696 |
| -0.3237  | 689.97 | -0.253 | 689.14 | -0.697 |
| -0.31287 | 690.14 | -0.255 | 689.31 | -0.698 |
| -0.30611 | 690.31 | -0.256 | 689.48 | -0.7   |
| -0.36694 | 690.48 | -0.257 | 689.65 | -0.701 |
| -0.36979 | 690.65 | -0.257 | 689.82 | -0.702 |
| -0.38021 | 690.82 | -0.257 | 689.99 | -0.704 |
| -0.31453 | 690.99 | -0.256 | 690.16 | -0.705 |
| -0.29584 | 691.16 | -0.256 | 690.34 | -0.706 |
| -0.30717 | 691.33 | -0.256 | 690.51 | -0.708 |
| -0.34683 | 691.51 | -0.256 | 690.68 | -0.709 |
| -0.36631 | 691.68 | -0.258 | 690.85 | -0.709 |
| -0.34165 | 691.85 | -0.26  | 691.02 | -0.71  |
| -0.29949 | 692.02 | -0.262 | 691.19 | -0.711 |
| -0.311   | 692.19 | -0.263 | 691.36 | -0.711 |
| -0.31814 | 692.36 | -0.263 | 691.53 | -0.711 |
| -0.34476 | 692.53 | -0.263 | 691.7  | -0.711 |
| -0.32497 | 692.7  | -0.262 | 691.87 | -0.711 |
| -0.32368 | 692.87 | -0.261 | 692.05 | -0.711 |
| -0.3261  | 693.04 | -0.261 | 692.22 | -0.71  |
| -0.34225 | 693.22 | -0.259 | 692.39 | -0.71  |
| -0.3463  | 693.39 | -0.259 | 692.56 | -0.709 |
| -0.38118 | 693.56 | -0.258 | 692.73 | -0.709 |
| -0.40058 | 693.73 | -0.258 | 692.9  | -0.708 |
| -0.43665 | 693.9  | -0.258 | 693.07 | -0.708 |
| -0.41921 | 694.07 | -0.259 | 693.24 | -0.708 |
| -0.35892 | 694.24 | -0.267 | 693.41 | -0.709 |
| -0.35034 | 694.41 | -0.268 | 693.58 | -0.71  |
| -0.31633 | 694.58 | -0.271 | 693.75 | -0.712 |
| -0.36321 | 694.75 | -0.27  | 693.93 | -0.714 |
| -0.32067 | 694.92 | -0.27  | 694.1  | -0.717 |
| -0.33016 | 695.09 | -0.27  | 694.27 | -0.721 |
| -0.27711 | 695.26 | -0.271 | 694.44 | -0.725 |
| -0.31949 | 695.44 | -0.274 | 694.61 | -0.731 |
| -0.35019 | 695.61 | -0.276 | 694.78 | -0.74  |
| -0.41821 | 695.78 | -0.279 | 694.95 | -0.753 |
| -0.42535 | 695.95 | -0.28  | 695.12 | -0.78  |
| -0.38863 | 696.12 | -0.281 | 695.29 | -0.785 |

|          |        |        |        |        |
|----------|--------|--------|--------|--------|
| -0.33296 | 696.29 | -0.282 | 695.47 | -0.791 |
| -0.31051 | 696.46 | -0.281 | 695.64 | -0.798 |
| -0.31644 | 696.63 | -0.279 | 695.81 | -0.807 |
| -0.341   | 696.8  | -0.279 | 695.98 | -0.818 |
| -0.33947 | 696.97 | -0.283 | 696.15 | -0.832 |
| -0.33412 | 697.15 | -0.291 | 696.32 | -0.848 |
| -0.33507 | 697.32 | -0.288 | 696.49 | -0.869 |
| -0.32557 | 697.49 | -0.274 | 696.66 | -0.894 |
| -0.35504 | 697.66 | -0.276 | 696.83 | -0.926 |
| -0.37628 | 697.83 | -0.291 | 697.01 | -0.961 |
| -0.38808 | 698    | -0.324 | 697.18 | -1.01  |
| -0.38341 | 698.17 | -0.375 | 697.35 | -1.085 |
| -0.36095 | 698.34 | -0.444 | 697.52 | -1.217 |
| -0.34392 | 698.51 | -0.641 | 697.69 | -1.554 |
| -0.34829 |        |        |        |        |
| -0.36964 |        |        |        |        |
| -0.3864  |        |        |        |        |
| -0.38374 |        |        |        |        |
| -0.34907 |        |        |        |        |
| -0.38108 |        |        |        |        |
| -0.40277 |        |        |        |        |
| -0.43342 |        |        |        |        |
| -0.42896 |        |        |        |        |
| -0.39207 |        |        |        |        |
| -0.343   |        |        |        |        |
| -0.28268 |        |        |        |        |
| -0.29331 |        |        |        |        |
| -0.33247 |        |        |        |        |
| -0.39782 |        |        |        |        |
| -0.39782 |        |        |        |        |
| -0.41653 |        |        |        |        |
| -0.38877 |        |        |        |        |
| -0.41714 |        |        |        |        |
| -0.36916 |        |        |        |        |
| -0.35231 |        |        |        |        |
| -0.31612 |        |        |        |        |
| -0.30717 |        |        |        |        |
| -0.29118 |        |        |        |        |
| -0.27955 |        |        |        |        |
| -0.32511 |        |        |        |        |
| -0.38    |        |        |        |        |
| -0.38848 |        |        |        |        |
| -0.33315 |        |        |        |        |
| -0.30355 |        |        |        |        |
| -0.33101 |        |        |        |        |
| -0.41052 |        |        |        |        |
| -0.43192 |        |        |        |        |
| -0.41064 |        |        |        |        |
| -0.35128 |        |        |        |        |
| -0.36302 |        |        |        |        |
| -0.38733 |        |        |        |        |
| -0.44463 |        |        |        |        |
| -0.42977 |        |        |        |        |
| -0.41736 |        |        |        |        |

-0.38669  
-0.35254  
-0.3064  
-0.25552  
-0.23445  
-0.25887  
-0.35143  
-0.39506  
-0.40438  
-0.36223  
-0.38983  
-0.39886  
-0.40353  
-0.37111  
-0.36822  
-0.35154  
-0.35823  
-0.34629  
-0.3522  
-0.35166  
-0.3879  
-0.39105  
-0.41718  
-0.38057  
-0.37549  
-0.34294  
-0.33707  
-0.32375  
-0.30598  
-0.37473  
-0.47216  
-0.5462  
-0.51681  
-0.41926  
-0.36003  
-0.34029  
-0.36032  
-0.39288  
-0.4097  
-0.42423  
-0.40694  
-0.42364  
-0.46034  
-0.47401  
-0.43598  
-0.37406  
-0.3398  
-0.31891  
-0.31916  
-0.33825  
-0.35937  
-0.33291  
-0.31857  
-0.3532



-0.44085  
-0.4547  
-0.40467  
-0.34635  
-0.35553  
-0.41337  
-0.41119  
-0.40009  
-0.40142  
-0.45685  
-0.49507  
-0.44381  
-0.39211  
-0.35792  
-0.37291  
-0.38831  
-0.38378  
-0.41713  
-0.43815  
-0.46362  
-0.41554  
-0.3533  
-0.33223  
-0.35039  
-0.43288  
-0.44117

## Temperature Derivation Weight

|       |        |
|-------|--------|
| 49.56 | -0.321 |
| 49.57 | -0.273 |
| 49.57 | -0.38  |
| 49.58 | -0.433 |
| 49.59 | -0.42  |
| 49.6  | -0.395 |
| 49.6  | -0.369 |
| 49.61 | -0.352 |
| 49.62 | -0.34  |
| 49.62 | -0.333 |
| 49.63 | -0.328 |
| 49.64 | -0.328 |
| 49.65 | -0.325 |
| 49.66 | -0.325 |
| 49.67 | -0.325 |
| 49.68 | -0.327 |
| 49.7  | -0.329 |
| 49.72 | -0.331 |
| 49.74 | -0.332 |
| 49.76 | -0.332 |
| 49.79 | -0.333 |
| 49.81 | -0.331 |
| 49.84 | -0.328 |
| 49.88 | -0.325 |
| 49.91 | -0.326 |
| 49.95 | -0.328 |
| 49.99 | -0.328 |
| 50.04 | -0.332 |
| 50.08 | -0.331 |
| 50.13 | -0.328 |
| 50.18 | -0.323 |
| 50.23 | -0.319 |
| 50.29 | -0.316 |
| 50.34 | -0.317 |
| 50.4  | -0.319 |
| 50.46 | -0.321 |
| 50.52 | -0.324 |
| 50.58 | -0.326 |
| 50.64 | -0.328 |
| 50.71 | -0.329 |
| 50.78 | -0.33  |
| 50.84 | -0.332 |
| 50.91 | -0.333 |
| 50.99 | -0.335 |
| 51.06 | -0.337 |
| 51.13 | -0.338 |
| 51.21 | -0.34  |
| 51.28 | -0.34  |
| 51.36 | -0.342 |
| 51.44 | -0.343 |
| 51.52 | -0.345 |
| 51.6  | -0.347 |

|       |        |
|-------|--------|
| 51.69 | -0.349 |
| 51.77 | -0.35  |
| 51.86 | -0.351 |
| 51.94 | -0.353 |
| 52.03 | -0.354 |
| 52.12 | -0.355 |
| 52.21 | -0.355 |
| 52.3  | -0.356 |
| 52.39 | -0.357 |
| 52.49 | -0.359 |
| 52.58 | -0.361 |
| 52.68 | -0.363 |
| 52.78 | -0.363 |
| 52.87 | -0.364 |
| 52.97 | -0.365 |
| 53.07 | -0.367 |
| 53.18 | -0.37  |
| 53.28 | -0.375 |
| 53.38 | -0.379 |
| 53.49 | -0.384 |
| 53.59 | -0.388 |
| 53.7  | -0.391 |
| 53.8  | -0.392 |
| 53.91 | -0.394 |
| 54.02 | -0.395 |
| 54.13 | -0.397 |
| 54.24 | -0.398 |
| 54.35 | -0.399 |
| 54.47 | -0.4   |
| 54.58 | -0.4   |
| 54.69 | -0.4   |
| 54.81 | -0.4   |
| 54.92 | -0.4   |
| 55.04 | -0.401 |
| 55.16 | -0.402 |
| 55.27 | -0.407 |
| 55.39 | -0.413 |
| 55.51 | -0.419 |
| 55.63 | -0.425 |
| 55.75 | -0.43  |
| 55.88 | -0.434 |
| 56    | -0.437 |
| 56.12 | -0.438 |
| 56.25 | -0.437 |
| 56.37 | -0.437 |
| 56.5  | -0.438 |
| 56.62 | -0.44  |
| 56.75 | -0.444 |
| 56.88 | -0.449 |
| 57    | -0.454 |
| 57.13 | -0.457 |
| 57.26 | -0.46  |
| 57.39 | -0.462 |
| 57.52 | -0.463 |

|       |        |
|-------|--------|
| 57.65 | -0.464 |
| 57.78 | -0.465 |
| 57.92 | -0.468 |
| 58.05 | -0.473 |
| 58.18 | -0.478 |
| 58.31 | -0.482 |
| 58.45 | -0.485 |
| 58.58 | -0.486 |
| 58.72 | -0.489 |
| 58.85 | -0.492 |
| 58.99 | -0.496 |
| 59.13 | -0.5   |
| 59.26 | -0.503 |
| 59.4  | -0.506 |
| 59.54 | -0.508 |
| 59.68 | -0.51  |
| 59.82 | -0.512 |
| 59.96 | -0.513 |
| 60.1  | -0.514 |
| 60.24 | -0.516 |
| 60.38 | -0.517 |
| 60.52 | -0.519 |
| 60.66 | -0.521 |
| 60.8  | -0.523 |
| 60.95 | -0.527 |
| 61.09 | -0.531 |
| 61.23 | -0.536 |
| 61.38 | -0.539 |
| 61.52 | -0.542 |
| 61.66 | -0.546 |
| 61.81 | -0.551 |
| 61.95 | -0.553 |
| 62.1  | -0.553 |
| 62.25 | -0.552 |
| 62.39 | -0.551 |
| 62.54 | -0.551 |
| 62.69 | -0.553 |
| 62.83 | -0.554 |
| 62.98 | -0.556 |
| 63.13 | -0.56  |
| 63.28 | -0.566 |
| 63.43 | -0.573 |
| 63.57 | -0.577 |
| 63.72 | -0.579 |
| 63.87 | -0.579 |
| 64.02 | -0.578 |
| 64.17 | -0.576 |
| 64.32 | -0.575 |
| 64.47 | -0.573 |
| 64.63 | -0.574 |
| 64.78 | -0.577 |
| 64.93 | -0.581 |
| 65.08 | -0.584 |
| 65.23 | -0.585 |

|       |        |
|-------|--------|
| 65.38 | -0.584 |
| 65.54 | -0.584 |
| 65.69 | -0.584 |
| 65.84 | -0.585 |
| 66    | -0.587 |
| 66.15 | -0.588 |
| 66.3  | -0.589 |
| 66.46 | -0.59  |
| 66.61 | -0.59  |
| 66.77 | -0.589 |
| 66.92 | -0.59  |
| 67.08 | -0.592 |
| 67.23 | -0.594 |
| 67.39 | -0.594 |
| 67.54 | -0.594 |
| 67.7  | -0.596 |
| 67.85 | -0.599 |
| 68.01 | -0.604 |
| 68.17 | -0.608 |
| 68.32 | -0.612 |
| 68.48 | -0.614 |
| 68.64 | -0.616 |
| 68.79 | -0.617 |
| 68.95 | -0.618 |
| 69.11 | -0.62  |
| 69.27 | -0.619 |
| 69.42 | -0.616 |
| 69.58 | -0.615 |
| 69.74 | -0.616 |
| 69.9  | -0.618 |
| 70.06 | -0.62  |
| 70.22 | -0.62  |
| 70.37 | -0.62  |
| 70.53 | -0.619 |
| 70.69 | -0.618 |
| 70.85 | -0.62  |
| 71.01 | -0.621 |
| 71.17 | -0.622 |
| 71.33 | -0.621 |
| 71.49 | -0.621 |
| 71.65 | -0.623 |
| 71.81 | -0.626 |
| 71.97 | -0.627 |
| 72.13 | -0.629 |
| 72.29 | -0.632 |
| 72.45 | -0.635 |
| 72.61 | -0.637 |
| 72.78 | -0.637 |
| 72.94 | -0.635 |
| 73.1  | -0.635 |
| 73.26 | -0.637 |
| 73.42 | -0.64  |
| 73.58 | -0.641 |
| 73.74 | -0.642 |

|       |        |
|-------|--------|
| 73.91 | -0.641 |
| 74.07 | -0.641 |
| 74.23 | -0.642 |
| 74.39 | -0.643 |
| 74.55 | -0.645 |
| 74.72 | -0.648 |
| 74.88 | -0.648 |
| 75.04 | -0.646 |
| 75.2  | -0.642 |
| 75.37 | -0.64  |
| 75.53 | -0.64  |
| 75.69 | -0.643 |
| 75.85 | -0.643 |
| 76.02 | -0.642 |
| 76.18 | -0.639 |
| 76.34 | -0.638 |
| 76.51 | -0.638 |
| 76.67 | -0.637 |
| 76.84 | -0.636 |
| 77    | -0.635 |
| 77.16 | -0.634 |
| 77.33 | -0.635 |
| 77.49 | -0.637 |
| 77.65 | -0.64  |
| 77.82 | -0.64  |
| 77.98 | -0.638 |
| 78.15 | -0.637 |
| 78.31 | -0.636 |
| 78.48 | -0.636 |
| 78.64 | -0.637 |
| 78.8  | -0.639 |
| 78.97 | -0.64  |
| 79.13 | -0.639 |
| 79.3  | -0.637 |
| 79.46 | -0.635 |
| 79.63 | -0.634 |
| 79.79 | -0.633 |
| 79.96 | -0.631 |
| 80.12 | -0.631 |
| 80.29 | -0.633 |
| 80.45 | -0.635 |
| 80.62 | -0.636 |
| 80.78 | -0.634 |
| 80.95 | -0.633 |
| 81.11 | -0.631 |
| 81.28 | -0.632 |
| 81.44 | -0.633 |
| 81.61 | -0.632 |
| 81.78 | -0.628 |
| 81.94 | -0.626 |
| 82.11 | -0.625 |
| 82.27 | -0.625 |
| 82.44 | -0.624 |
| 82.6  | -0.623 |

|       |        |
|-------|--------|
| 82.77 | -0.622 |
| 82.93 | -0.62  |
| 83.1  | -0.619 |
| 83.27 | -0.618 |
| 83.43 | -0.621 |
| 83.6  | -0.623 |
| 83.76 | -0.624 |
| 83.93 | -0.624 |
| 84.1  | -0.621 |
| 84.26 | -0.618 |
| 84.43 | -0.615 |
| 84.59 | -0.614 |
| 84.76 | -0.614 |
| 84.93 | -0.613 |
| 85.09 | -0.613 |
| 85.26 | -0.612 |
| 85.43 | -0.612 |
| 85.59 | -0.613 |
| 85.76 | -0.614 |
| 85.93 | -0.614 |
| 86.09 | -0.613 |
| 86.26 | -0.612 |
| 86.43 | -0.611 |
| 86.59 | -0.609 |
| 86.76 | -0.608 |
| 86.93 | -0.606 |
| 87.09 | -0.605 |
| 87.26 | -0.605 |
| 87.43 | -0.605 |
| 87.59 | -0.605 |
| 87.76 | -0.604 |
| 87.93 | -0.602 |
| 88.09 | -0.603 |
| 88.26 | -0.604 |
| 88.43 | -0.604 |
| 88.59 | -0.6   |
| 88.76 | -0.596 |
| 88.93 | -0.592 |
| 89.09 | -0.59  |
| 89.26 | -0.59  |
| 89.43 | -0.59  |
| 89.6  | -0.59  |
| 89.76 | -0.588 |
| 89.93 | -0.587 |
| 90.1  | -0.585 |
| 90.26 | -0.585 |
| 90.43 | -0.584 |
| 90.6  | -0.584 |
| 90.77 | -0.586 |
| 90.93 | -0.589 |
| 91.1  | -0.59  |
| 91.27 | -0.589 |
| 91.43 | -0.588 |
| 91.6  | -0.586 |

|        |        |
|--------|--------|
| 91.77  | -0.585 |
| 91.94  | -0.585 |
| 92.1   | -0.584 |
| 92.27  | -0.582 |
| 92.44  | -0.579 |
| 92.61  | -0.577 |
| 92.77  | -0.577 |
| 92.94  | -0.576 |
| 93.11  | -0.575 |
| 93.27  | -0.573 |
| 93.44  | -0.571 |
| 93.61  | -0.569 |
| 93.78  | -0.567 |
| 93.94  | -0.567 |
| 94.11  | -0.566 |
| 94.28  | -0.565 |
| 94.45  | -0.563 |
| 94.61  | -0.561 |
| 94.78  | -0.56  |
| 94.95  | -0.559 |
| 95.12  | -0.557 |
| 95.28  | -0.556 |
| 95.45  | -0.554 |
| 95.62  | -0.552 |
| 95.79  | -0.549 |
| 95.95  | -0.545 |
| 96.12  | -0.544 |
| 96.29  | -0.544 |
| 96.46  | -0.542 |
| 96.62  | -0.538 |
| 96.79  | -0.535 |
| 96.96  | -0.532 |
| 97.13  | -0.531 |
| 97.29  | -0.53  |
| 97.46  | -0.527 |
| 97.63  | -0.526 |
| 97.8   | -0.526 |
| 97.96  | -0.528 |
| 98.13  | -0.528 |
| 98.3   | -0.526 |
| 98.47  | -0.523 |
| 98.63  | -0.522 |
| 98.8   | -0.521 |
| 98.97  | -0.521 |
| 99.14  | -0.517 |
| 99.3   | -0.511 |
| 99.47  | -0.504 |
| 99.64  | -0.5   |
| 99.81  | -0.497 |
| 99.97  | -0.494 |
| 100.14 | -0.491 |
| 100.31 | -0.49  |
| 100.48 | -0.489 |
| 100.65 | -0.487 |



|        |        |
|--------|--------|
| 100.81 | -0.487 |
| 100.98 | -0.486 |
| 101.15 | -0.486 |
| 101.32 | -0.487 |
| 101.48 | -0.487 |
| 101.65 | -0.486 |
| 101.82 | -0.484 |
| 101.99 | -0.483 |
| 102.15 | -0.482 |
| 102.32 | -0.481 |
| 102.49 | -0.48  |
| 102.66 | -0.477 |
| 102.82 | -0.473 |
| 102.99 | -0.471 |
| 103.16 | -0.472 |
| 103.33 | -0.473 |
| 103.5  | -0.472 |
| 103.66 | -0.471 |
| 103.83 | -0.469 |
| 104    | -0.468 |
| 104.17 | -0.467 |
| 104.33 | -0.465 |
| 104.5  | -0.464 |
| 104.67 | -0.463 |
| 104.84 | -0.463 |
| 105    | -0.461 |
| 105.17 | -0.46  |
| 105.34 | -0.458 |
| 105.51 | -0.458 |
| 105.67 | -0.456 |
| 105.84 | -0.455 |
| 106.01 | -0.454 |
| 106.18 | -0.452 |
| 106.34 | -0.449 |
| 106.51 | -0.445 |
| 106.68 | -0.443 |
| 106.85 | -0.44  |
| 107.02 | -0.439 |
| 107.18 | -0.438 |
| 107.35 | -0.438 |
| 107.52 | -0.437 |
| 107.69 | -0.437 |
| 107.85 | -0.438 |
| 108.02 | -0.438 |
| 108.19 | -0.436 |
| 108.36 | -0.434 |
| 108.52 | -0.434 |
| 108.69 | -0.433 |
| 108.86 | -0.432 |
| 109.03 | -0.432 |
| 109.19 | -0.432 |
| 109.36 | -0.431 |
| 109.53 | -0.429 |
| 109.7  | -0.427 |

|        |        |
|--------|--------|
| 109.86 | -0.425 |
| 110.03 | -0.422 |
| 110.2  | -0.419 |
| 110.37 | -0.417 |
| 110.53 | -0.416 |
| 110.7  | -0.415 |
| 110.87 | -0.413 |
| 111.04 | -0.412 |
| 111.2  | -0.411 |
| 111.37 | -0.409 |
| 111.54 | -0.407 |
| 111.71 | -0.403 |
| 111.87 | -0.399 |
| 112.04 | -0.396 |
| 112.21 | -0.396 |
| 112.38 | -0.396 |
| 112.54 | -0.397 |
| 112.71 | -0.397 |
| 112.88 | -0.397 |
| 113.05 | -0.395 |
| 113.21 | -0.392 |
| 113.38 | -0.389 |
| 113.55 | -0.386 |
| 113.72 | -0.385 |
| 113.88 | -0.384 |
| 114.05 | -0.382 |
| 114.22 | -0.381 |
| 114.39 | -0.379 |
| 114.55 | -0.377 |
| 114.72 | -0.374 |
| 114.89 | -0.371 |
| 115.06 | -0.368 |
| 115.22 | -0.366 |
| 115.39 | -0.365 |
| 115.56 | -0.363 |
| 115.72 | -0.362 |
| 115.89 | -0.36  |
| 116.06 | -0.359 |
| 116.23 | -0.358 |
| 116.39 | -0.357 |
| 116.56 | -0.358 |
| 116.73 | -0.359 |
| 116.9  | -0.36  |
| 117.06 | -0.361 |
| 117.23 | -0.361 |
| 117.4  | -0.359 |
| 117.56 | -0.355 |
| 117.73 | -0.351 |
| 117.9  | -0.349 |
| 118.07 | -0.348 |
| 118.23 | -0.347 |
| 118.4  | -0.345 |
| 118.57 | -0.343 |
| 118.74 | -0.341 |

|        |        |
|--------|--------|
| 118.9  | -0.34  |
| 119.07 | -0.34  |
| 119.24 | -0.34  |
| 119.4  | -0.34  |
| 119.57 | -0.339 |
| 119.74 | -0.337 |
| 119.91 | -0.336 |
| 120.07 | -0.335 |
| 120.24 | -0.335 |
| 120.41 | -0.335 |
| 120.58 | -0.334 |
| 120.74 | -0.333 |
| 120.91 | -0.33  |
| 121.08 | -0.326 |
| 121.24 | -0.324 |
| 121.41 | -0.322 |
| 121.58 | -0.321 |
| 121.75 | -0.32  |
| 121.91 | -0.32  |
| 122.08 | -0.32  |
| 122.25 | -0.319 |
| 122.41 | -0.319 |
| 122.58 | -0.319 |
| 122.75 | -0.319 |
| 122.92 | -0.319 |
| 123.08 | -0.32  |
| 123.25 | -0.322 |
| 123.42 | -0.324 |
| 123.58 | -0.325 |
| 123.75 | -0.326 |
| 123.92 | -0.324 |
| 124.08 | -0.323 |
| 124.25 | -0.32  |
| 124.42 | -0.318 |
| 124.58 | -0.316 |
| 124.75 | -0.313 |
| 124.92 | -0.31  |
| 125.09 | -0.307 |
| 125.25 | -0.305 |
| 125.42 | -0.302 |
| 125.59 | -0.3   |
| 125.75 | -0.297 |
| 125.92 | -0.296 |
| 126.09 | -0.294 |
| 126.25 | -0.295 |
| 126.42 | -0.295 |
| 126.59 | -0.296 |
| 126.76 | -0.298 |
| 126.92 | -0.299 |
| 127.09 | -0.301 |
| 127.26 | -0.301 |
| 127.42 | -0.3   |
| 127.59 | -0.299 |
| 127.76 | -0.296 |

|        |        |
|--------|--------|
| 127.92 | -0.294 |
| 128.09 | -0.292 |
| 128.26 | -0.291 |
| 128.42 | -0.29  |
| 128.59 | -0.289 |
| 128.76 | -0.289 |
| 128.92 | -0.29  |
| 129.09 | -0.291 |
| 129.26 | -0.29  |
| 129.42 | -0.29  |
| 129.59 | -0.291 |
| 129.76 | -0.292 |
| 129.92 | -0.293 |
| 130.09 | -0.294 |
| 130.26 | -0.296 |
| 130.42 | -0.298 |
| 130.59 | -0.298 |
| 130.76 | -0.299 |
| 130.92 | -0.3   |
| 131.09 | -0.3   |
| 131.25 | -0.3   |
| 131.42 | -0.3   |
| 131.59 | -0.3   |
| 131.75 | -0.3   |
| 131.92 | -0.299 |
| 132.09 | -0.298 |
| 132.25 | -0.298 |
| 132.42 | -0.3   |
| 132.59 | -0.3   |
| 132.75 | -0.301 |
| 132.92 | -0.303 |
| 133.09 | -0.305 |
| 133.25 | -0.307 |
| 133.42 | -0.309 |
| 133.59 | -0.31  |
| 133.75 | -0.31  |
| 133.92 | -0.312 |
| 134.08 | -0.313 |
| 134.25 | -0.315 |
| 134.42 | -0.316 |
| 134.58 | -0.318 |
| 134.75 | -0.319 |
| 134.92 | -0.319 |
| 135.08 | -0.318 |
| 135.25 | -0.317 |
| 135.42 | -0.317 |
| 135.58 | -0.318 |
| 135.74 | -0.319 |
| 135.9  | -0.32  |
| 136.06 | -0.32  |
| 136.22 | -0.321 |
| 136.38 | -0.322 |
| 136.54 | -0.322 |
| 136.7  | -0.322 |

|        |        |
|--------|--------|
| 136.87 | -0.322 |
| 137.04 | -0.322 |
| 137.21 | -0.321 |
| 137.38 | -0.32  |
| 137.55 | -0.32  |
| 137.72 | -0.32  |
| 137.89 | -0.32  |
| 138.06 | -0.32  |
| 138.23 | -0.32  |
| 138.4  | -0.32  |
| 138.57 | -0.318 |
| 138.73 | -0.317 |
| 138.9  | -0.315 |
| 139.07 | -0.315 |
| 139.23 | -0.316 |
| 139.4  | -0.318 |
| 139.57 | -0.319 |
| 139.73 | -0.32  |
| 139.9  | -0.32  |
| 140.07 | -0.319 |
| 140.24 | -0.318 |
| 140.41 | -0.318 |
| 140.57 | -0.319 |
| 140.74 | -0.321 |
| 140.91 | -0.322 |
| 141.08 | -0.324 |
| 141.25 | -0.324 |
| 141.41 | -0.322 |
| 141.58 | -0.319 |
| 141.75 | -0.317 |
| 141.92 | -0.317 |
| 142.09 | -0.316 |
| 142.25 | -0.316 |
| 142.42 | -0.315 |
| 142.59 | -0.315 |
| 142.76 | -0.315 |
| 142.93 | -0.316 |
| 143.1  | -0.316 |
| 143.27 | -0.316 |
| 143.44 | -0.317 |
| 143.6  | -0.317 |
| 143.77 | -0.317 |
| 143.94 | -0.315 |
| 144.11 | -0.314 |
| 144.28 | -0.313 |
| 144.45 | -0.312 |
| 144.62 | -0.311 |
| 144.79 | -0.311 |
| 144.96 | -0.31  |
| 145.13 | -0.308 |
| 145.29 | -0.308 |
| 145.46 | -0.307 |
| 145.63 | -0.306 |
| 145.8  | -0.305 |

|        |        |
|--------|--------|
| 145.97 | -0.304 |
| 146.14 | -0.303 |
| 146.31 | -0.303 |
| 146.48 | -0.302 |
| 146.65 | -0.301 |
| 146.82 | -0.301 |
| 146.99 | -0.3   |
| 147.16 | -0.3   |
| 147.33 | -0.3   |
| 147.49 | -0.3   |
| 147.66 | -0.299 |
| 147.83 | -0.296 |
| 148    | -0.293 |
| 148.17 | -0.29  |
| 148.34 | -0.289 |
| 148.51 | -0.288 |
| 148.68 | -0.287 |
| 148.85 | -0.286 |
| 149.02 | -0.285 |
| 149.19 | -0.284 |
| 149.36 | -0.282 |
| 149.53 | -0.28  |
| 149.7  | -0.279 |
| 149.87 | -0.278 |
| 150.04 | -0.277 |
| 150.21 | -0.277 |
| 150.38 | -0.276 |
| 150.54 | -0.276 |
| 150.71 | -0.275 |
| 150.88 | -0.275 |
| 151.05 | -0.275 |
| 151.22 | -0.274 |
| 151.39 | -0.272 |
| 151.56 | -0.269 |
| 151.73 | -0.266 |
| 151.9  | -0.263 |
| 152.07 | -0.26  |
| 152.24 | -0.258 |
| 152.41 | -0.256 |
| 152.58 | -0.256 |
| 152.75 | -0.256 |
| 152.92 | -0.257 |
| 153.09 | -0.256 |
| 153.26 | -0.256 |
| 153.43 | -0.256 |
| 153.6  | -0.256 |
| 153.77 | -0.257 |
| 153.94 | -0.258 |
| 154.1  | -0.258 |
| 154.27 | -0.259 |
| 154.44 | -0.259 |
| 154.61 | -0.259 |
| 154.78 | -0.257 |
| 154.95 | -0.256 |

|        |        |
|--------|--------|
| 155.12 | -0.254 |
| 155.29 | -0.253 |
| 155.46 | -0.252 |
| 155.63 | -0.251 |
| 155.8  | -0.249 |
| 155.97 | -0.248 |
| 156.14 | -0.247 |
| 156.31 | -0.245 |
| 156.48 | -0.244 |
| 156.65 | -0.244 |
| 156.82 | -0.242 |
| 156.99 | -0.241 |
| 157.16 | -0.24  |
| 157.33 | -0.239 |
| 157.5  | -0.238 |
| 157.67 | -0.237 |
| 157.84 | -0.236 |
| 158    | -0.235 |
| 158.17 | -0.234 |
| 158.34 | -0.233 |
| 158.51 | -0.233 |
| 158.68 | -0.232 |
| 158.85 | -0.232 |
| 159.02 | -0.231 |
| 159.19 | -0.23  |
| 159.36 | -0.23  |
| 159.53 | -0.229 |
| 159.7  | -0.228 |
| 159.87 | -0.227 |
| 160.04 | -0.226 |
| 160.21 | -0.226 |
| 160.38 | -0.225 |
| 160.55 | -0.225 |
| 160.72 | -0.225 |
| 160.89 | -0.225 |
| 161.06 | -0.224 |
| 161.23 | -0.224 |
| 161.4  | -0.224 |
| 161.56 | -0.225 |
| 161.73 | -0.226 |
| 161.9  | -0.226 |
| 162.07 | -0.225 |
| 162.24 | -0.223 |
| 162.41 | -0.222 |
| 162.58 | -0.221 |
| 162.75 | -0.219 |
| 162.92 | -0.218 |
| 163.09 | -0.216 |
| 163.26 | -0.215 |
| 163.43 | -0.214 |
| 163.6  | -0.213 |
| 163.77 | -0.211 |
| 163.94 | -0.209 |
| 164.11 | -0.207 |

|        |        |
|--------|--------|
| 164.28 | -0.206 |
| 164.45 | -0.205 |
| 164.62 | -0.204 |
| 164.79 | -0.202 |
| 164.96 | -0.199 |
| 165.13 | -0.198 |
| 165.3  | -0.197 |
| 165.46 | -0.197 |
| 165.63 | -0.196 |
| 165.8  | -0.196 |
| 165.97 | -0.195 |
| 166.14 | -0.194 |
| 166.31 | -0.194 |
| 166.48 | -0.194 |
| 166.65 | -0.193 |
| 166.82 | -0.193 |
| 166.99 | -0.192 |
| 167.16 | -0.191 |
| 167.33 | -0.19  |
| 167.5  | -0.189 |
| 167.67 | -0.189 |
| 167.84 | -0.188 |
| 168.01 | -0.187 |
| 168.18 | -0.186 |
| 168.35 | -0.185 |
| 168.52 | -0.184 |
| 168.69 | -0.184 |
| 168.86 | -0.184 |
| 169.02 | -0.184 |
| 169.19 | -0.182 |
| 169.36 | -0.181 |
| 169.53 | -0.179 |
| 169.7  | -0.178 |
| 169.87 | -0.176 |
| 170.04 | -0.174 |
| 170.21 | -0.17  |
| 170.38 | -0.168 |
| 170.55 | -0.166 |
| 170.72 | -0.166 |
| 170.89 | -0.166 |
| 171.06 | -0.167 |
| 171.23 | -0.167 |
| 171.4  | -0.167 |
| 171.57 | -0.165 |
| 171.74 | -0.164 |
| 171.91 | -0.163 |
| 172.08 | -0.163 |
| 172.24 | -0.164 |
| 172.41 | -0.164 |
| 172.58 | -0.165 |
| 172.75 | -0.166 |
| 172.92 | -0.166 |
| 173.09 | -0.167 |
| 173.26 | -0.168 |



|        |        |
|--------|--------|
| 173.43 | -0.17  |
| 173.6  | -0.172 |
| 173.77 | -0.173 |
| 173.94 | -0.174 |
| 174.11 | -0.174 |
| 174.28 | -0.173 |
| 174.45 | -0.172 |
| 174.62 | -0.172 |
| 174.79 | -0.172 |
| 174.96 | -0.172 |
| 175.13 | -0.172 |
| 175.3  | -0.171 |
| 175.47 | -0.171 |
| 175.64 | -0.171 |
| 175.8  | -0.171 |
| 175.97 | -0.171 |
| 176.14 | -0.171 |
| 176.31 | -0.171 |
| 176.48 | -0.171 |
| 176.65 | -0.17  |
| 176.82 | -0.17  |
| 176.99 | -0.169 |
| 177.16 | -0.168 |
| 177.33 | -0.166 |
| 177.5  | -0.165 |
| 177.67 | -0.163 |
| 177.84 | -0.162 |
| 178.01 | -0.162 |
| 178.18 | -0.162 |
| 178.35 | -0.162 |
| 178.52 | -0.162 |
| 178.69 | -0.161 |
| 178.86 | -0.16  |
| 179.03 | -0.161 |
| 179.2  | -0.162 |
| 179.37 | -0.162 |
| 179.53 | -0.162 |
| 179.7  | -0.162 |
| 179.87 | -0.161 |
| 180.04 | -0.161 |
| 180.21 | -0.161 |
| 180.38 | -0.161 |
| 180.55 | -0.16  |
| 180.72 | -0.159 |
| 180.89 | -0.158 |
| 181.06 | -0.158 |
| 181.23 | -0.159 |
| 181.4  | -0.159 |
| 181.57 | -0.159 |
| 181.74 | -0.158 |
| 181.91 | -0.157 |
| 182.08 | -0.157 |
| 182.25 | -0.156 |
| 182.42 | -0.156 |

|        |        |
|--------|--------|
| 182.59 | -0.155 |
| 182.76 | -0.154 |
| 182.93 | -0.154 |
| 183.1  | -0.154 |
| 183.27 | -0.154 |
| 183.44 | -0.154 |
| 183.61 | -0.154 |
| 183.78 | -0.154 |
| 183.95 | -0.153 |
| 184.12 | -0.151 |
| 184.29 | -0.15  |
| 184.45 | -0.149 |
| 184.62 | -0.149 |
| 184.79 | -0.149 |
| 184.96 | -0.15  |
| 185.13 | -0.15  |
| 185.3  | -0.15  |
| 185.47 | -0.15  |
| 185.64 | -0.151 |
| 185.81 | -0.151 |
| 185.98 | -0.153 |
| 186.15 | -0.154 |
| 186.32 | -0.156 |
| 186.49 | -0.157 |
| 186.66 | -0.157 |
| 186.83 | -0.157 |
| 187    | -0.157 |
| 187.17 | -0.158 |
| 187.34 | -0.159 |
| 187.51 | -0.159 |
| 187.68 | -0.158 |
| 187.85 | -0.158 |
| 188.02 | -0.157 |
| 188.19 | -0.157 |
| 188.36 | -0.157 |
| 188.53 | -0.157 |
| 188.7  | -0.157 |
| 188.87 | -0.158 |
| 189.04 | -0.16  |
| 189.21 | -0.161 |
| 189.38 | -0.163 |
| 189.55 | -0.163 |
| 189.72 | -0.164 |
| 189.89 | -0.165 |
| 190.06 | -0.164 |
| 190.23 | -0.164 |
| 190.4  | -0.164 |
| 190.57 | -0.164 |
| 190.74 | -0.164 |
| 190.91 | -0.163 |
| 191.08 | -0.163 |
| 191.25 | -0.164 |
| 191.42 | -0.165 |
| 191.59 | -0.166 |

|        |        |
|--------|--------|
| 191.76 | -0.168 |
| 191.93 | -0.17  |
| 192.1  | -0.172 |
| 192.27 | -0.173 |
| 192.44 | -0.175 |
| 192.61 | -0.177 |
| 192.78 | -0.179 |
| 192.95 | -0.181 |
| 193.12 | -0.182 |
| 193.29 | -0.183 |
| 193.46 | -0.183 |
| 193.63 | -0.183 |
| 193.8  | -0.184 |
| 193.97 | -0.184 |
| 194.14 | -0.185 |
| 194.31 | -0.184 |
| 194.48 | -0.184 |
| 194.65 | -0.184 |
| 194.82 | -0.183 |
| 194.99 | -0.183 |
| 195.16 | -0.183 |
| 195.33 | -0.184 |
| 195.5  | -0.186 |
| 195.67 | -0.187 |
| 195.84 | -0.189 |
| 196.01 | -0.191 |
| 196.18 | -0.193 |
| 196.35 | -0.194 |
| 196.52 | -0.195 |
| 196.69 | -0.196 |
| 196.86 | -0.197 |
| 197.03 | -0.198 |
| 197.2  | -0.201 |
| 197.37 | -0.202 |
| 197.54 | -0.203 |
| 197.71 | -0.202 |
| 197.88 | -0.202 |
| 198.05 | -0.202 |
| 198.22 | -0.202 |
| 198.39 | -0.202 |
| 198.56 | -0.202 |
| 198.73 | -0.203 |
| 198.9  | -0.205 |
| 199.07 | -0.207 |
| 199.24 | -0.208 |
| 199.41 | -0.21  |
| 199.58 | -0.213 |
| 199.75 | -0.215 |
| 199.92 | -0.217 |
| 200.09 | -0.218 |
| 200.26 | -0.219 |
| 200.43 | -0.22  |
| 200.6  | -0.22  |
| 200.77 | -0.221 |

|        |        |
|--------|--------|
| 200.94 | -0.222 |
| 201.11 | -0.223 |
| 201.28 | -0.224 |
| 201.45 | -0.225 |
| 201.62 | -0.226 |
| 201.79 | -0.227 |
| 201.96 | -0.229 |
| 202.13 | -0.23  |
| 202.3  | -0.232 |
| 202.48 | -0.235 |
| 202.65 | -0.238 |
| 202.82 | -0.242 |
| 202.99 | -0.245 |
| 203.16 | -0.248 |
| 203.33 | -0.25  |
| 203.5  | -0.253 |
| 203.67 | -0.255 |
| 203.84 | -0.259 |
| 204.01 | -0.264 |
| 204.18 | -0.268 |
| 204.35 | -0.27  |
| 204.52 | -0.272 |
| 204.69 | -0.273 |
| 204.86 | -0.272 |
| 205.03 | -0.272 |
| 205.2  | -0.272 |
| 205.37 | -0.272 |
| 205.54 | -0.273 |
| 205.71 | -0.275 |
| 205.88 | -0.277 |
| 206.05 | -0.281 |
| 206.22 | -0.284 |
| 206.39 | -0.288 |
| 206.56 | -0.292 |
| 206.73 | -0.296 |
| 206.9  | -0.299 |
| 207.07 | -0.303 |
| 207.25 | -0.307 |
| 207.42 | -0.311 |
| 207.59 | -0.313 |
| 207.76 | -0.315 |
| 207.93 | -0.319 |
| 208.1  | -0.322 |
| 208.27 | -0.325 |
| 208.44 | -0.328 |
| 208.61 | -0.331 |
| 208.78 | -0.334 |
| 208.95 | -0.337 |
| 209.12 | -0.339 |
| 209.29 | -0.34  |
| 209.46 | -0.342 |
| 209.63 | -0.344 |
| 209.8  | -0.346 |
| 209.97 | -0.348 |

|        |        |
|--------|--------|
| 210.14 | -0.351 |
| 210.32 | -0.354 |
| 210.49 | -0.357 |
| 210.66 | -0.359 |
| 210.83 | -0.361 |
| 211    | -0.364 |
| 211.17 | -0.367 |
| 211.34 | -0.37  |
| 211.51 | -0.373 |
| 211.68 | -0.376 |
| 211.85 | -0.378 |
| 212.02 | -0.382 |
| 212.19 | -0.387 |
| 212.36 | -0.391 |
| 212.53 | -0.393 |
| 212.7  | -0.394 |
| 212.87 | -0.396 |
| 213.05 | -0.4   |
| 213.22 | -0.405 |
| 213.39 | -0.409 |
| 213.56 | -0.414 |
| 213.73 | -0.419 |
| 213.9  | -0.425 |
| 214.07 | -0.431 |
| 214.24 | -0.437 |
| 214.41 | -0.442 |
| 214.58 | -0.445 |
| 214.75 | -0.447 |
| 214.92 | -0.449 |
| 215.09 | -0.452 |
| 215.26 | -0.456 |
| 215.43 | -0.461 |
| 215.61 | -0.467 |
| 215.78 | -0.472 |
| 215.95 | -0.476 |
| 216.12 | -0.483 |
| 216.29 | -0.491 |
| 216.46 | -0.497 |
| 216.63 | -0.501 |
| 216.8  | -0.506 |
| 216.97 | -0.512 |
| 217.14 | -0.517 |
| 217.31 | -0.52  |
| 217.48 | -0.524 |
| 217.65 | -0.528 |
| 217.83 | -0.534 |
| 218    | -0.541 |
| 218.17 | -0.548 |
| 218.34 | -0.555 |
| 218.51 | -0.561 |
| 218.68 | -0.568 |
| 218.85 | -0.574 |
| 219.02 | -0.581 |
| 219.19 | -0.588 |

|        |        |
|--------|--------|
| 219.36 | -0.594 |
| 219.53 | -0.602 |
| 219.7  | -0.611 |
| 219.88 | -0.62  |
| 220.05 | -0.628 |
| 220.22 | -0.636 |
| 220.39 | -0.646 |
| 220.56 | -0.656 |
| 220.73 | -0.663 |
| 220.9  | -0.668 |
| 221.07 | -0.673 |
| 221.24 | -0.682 |
| 221.41 | -0.692 |
| 221.58 | -0.7   |
| 221.76 | -0.709 |
| 221.93 | -0.716 |
| 222.1  | -0.723 |
| 222.27 | -0.731 |
| 222.44 | -0.741 |
| 222.61 | -0.75  |
| 222.78 | -0.757 |
| 222.95 | -0.763 |
| 223.12 | -0.768 |
| 223.29 | -0.775 |
| 223.46 | -0.783 |
| 223.64 | -0.793 |
| 223.81 | -0.804 |
| 223.98 | -0.812 |
| 224.15 | -0.82  |
| 224.32 | -0.828 |
| 224.49 | -0.836 |
| 224.66 | -0.846 |
| 224.83 | -0.858 |
| 225    | -0.868 |
| 225.17 | -0.877 |
| 225.35 | -0.887 |
| 225.52 | -0.895 |
| 225.69 | -0.9   |
| 225.86 | -0.903 |
| 226.03 | -0.908 |
| 226.2  | -0.916 |
| 226.37 | -0.924 |
| 226.54 | -0.931 |
| 226.71 | -0.936 |
| 226.88 | -0.941 |
| 227.06 | -0.946 |
| 227.23 | -0.955 |
| 227.4  | -0.962 |
| 227.57 | -0.966 |
| 227.74 | -0.968 |
| 227.91 | -0.974 |
| 228.08 | -0.983 |
| 228.25 | -0.99  |
| 228.42 | -0.994 |

|        |        |
|--------|--------|
| 228.6  | -0.994 |
| 228.77 | -0.994 |
| 228.94 | -0.994 |
| 229.11 | -0.994 |
| 229.28 | -0.995 |
| 229.45 | -0.998 |
| 229.62 | -1.001 |
| 229.79 | -1.003 |
| 229.96 | -1.002 |
| 230.14 | -1.001 |
| 230.31 | -1.003 |
| 230.48 | -1.004 |
| 230.65 | -1.007 |
| 230.82 | -1.01  |
| 230.99 | -1.013 |
| 231.16 | -1.012 |
| 231.33 | -1.012 |
| 231.5  | -1.015 |
| 231.67 | -1.017 |
| 231.84 | -1.018 |
| 232.01 | -1.017 |
| 232.18 | -1.016 |
| 232.35 | -1.014 |
| 232.52 | -1.01  |
| 232.69 | -1.007 |
| 232.86 | -1.003 |
| 233.03 | -1.002 |
| 233.2  | -1.002 |
| 233.37 | -1     |
| 233.54 | -0.993 |
| 233.71 | -0.987 |
| 233.88 | -0.982 |
| 234.05 | -0.977 |
| 234.22 | -0.971 |
| 234.39 | -0.97  |
| 234.56 | -0.972 |
| 234.73 | -0.976 |
| 234.9  | -0.976 |
| 235.07 | -0.974 |
| 235.24 | -0.971 |
| 235.41 | -0.97  |
| 235.58 | -0.968 |
| 235.75 | -0.964 |
| 235.92 | -0.96  |
| 236.09 | -0.959 |
| 236.25 | -0.962 |
| 236.42 | -0.965 |
| 236.59 | -0.964 |
| 236.76 | -0.962 |
| 236.93 | -0.96  |
| 237.1  | -0.959 |
| 237.27 | -0.959 |
| 237.44 | -0.962 |
| 237.61 | -0.963 |

|        |        |
|--------|--------|
| 237.78 | -0.962 |
| 237.95 | -0.96  |
| 238.12 | -0.958 |
| 238.28 | -0.96  |
| 238.45 | -0.962 |
| 238.62 | -0.962 |
| 238.79 | -0.959 |
| 238.96 | -0.954 |
| 239.13 | -0.95  |
| 239.3  | -0.947 |
| 239.47 | -0.945 |
| 239.64 | -0.944 |
| 239.8  | -0.945 |
| 239.97 | -0.945 |
| 240.14 | -0.945 |
| 240.31 | -0.946 |
| 240.48 | -0.949 |
| 240.65 | -0.955 |
| 240.82 | -0.959 |
| 240.99 | -0.961 |
| 241.16 | -0.962 |
| 241.32 | -0.963 |
| 241.49 | -0.963 |
| 241.66 | -0.965 |
| 241.83 | -0.965 |
| 242    | -0.966 |
| 242.17 | -0.966 |
| 242.34 | -0.969 |
| 242.51 | -0.973 |
| 242.67 | -0.977 |
| 242.84 | -0.98  |
| 243.01 | -0.982 |
| 243.18 | -0.981 |
| 243.35 | -0.981 |
| 243.52 | -0.982 |
| 243.69 | -0.986 |
| 243.85 | -0.992 |
| 244.02 | -0.996 |
| 244.19 | -0.998 |
| 244.36 | -1.001 |
| 244.53 | -1.005 |
| 244.7  | -1.007 |
| 244.86 | -1.007 |
| 245.03 | -1.004 |
| 245.2  | -1.003 |
| 245.37 | -1.003 |
| 245.54 | -1.009 |
| 245.71 | -1.018 |
| 245.87 | -1.023 |
| 246.04 | -1.024 |
| 246.21 | -1.025 |
| 246.38 | -1.028 |
| 246.55 | -1.032 |
| 246.72 | -1.033 |



|        |        |
|--------|--------|
| 246.89 | -1.034 |
| 247.05 | -1.036 |
| 247.22 | -1.044 |
| 247.39 | -1.054 |
| 247.56 | -1.064 |
| 247.73 | -1.072 |
| 247.9  | -1.077 |
| 248.06 | -1.081 |
| 248.23 | -1.085 |
| 248.4  | -1.09  |
| 248.57 | -1.092 |
| 248.74 | -1.093 |
| 248.91 | -1.095 |
| 249.07 | -1.099 |
| 249.24 | -1.101 |
| 249.41 | -1.104 |
| 249.58 | -1.106 |
| 249.75 | -1.111 |
| 249.92 | -1.118 |
| 250.09 | -1.123 |
| 250.25 | -1.125 |
| 250.42 | -1.125 |
| 250.59 | -1.129 |
| 250.76 | -1.137 |
| 250.93 | -1.145 |
| 251.09 | -1.147 |
| 251.26 | -1.149 |
| 251.43 | -1.156 |
| 251.6  | -1.167 |
| 251.77 | -1.177 |
| 251.94 | -1.183 |
| 252.1  | -1.184 |
| 252.27 | -1.185 |
| 252.44 | -1.187 |
| 252.61 | -1.193 |
| 252.78 | -1.201 |
| 252.95 | -1.206 |
| 253.11 | -1.207 |
| 253.28 | -1.21  |
| 253.45 | -1.217 |
| 253.62 | -1.225 |
| 253.79 | -1.232 |
| 253.96 | -1.235 |
| 254.12 | -1.235 |
| 254.29 | -1.235 |
| 254.46 | -1.238 |
| 254.63 | -1.243 |
| 254.8  | -1.248 |
| 254.97 | -1.253 |
| 255.13 | -1.258 |
| 255.3  | -1.266 |
| 255.47 | -1.272 |
| 255.64 | -1.276 |
| 255.81 | -1.278 |

|        |        |
|--------|--------|
| 255.98 | -1.28  |
| 256.14 | -1.285 |
| 256.31 | -1.29  |
| 256.48 | -1.296 |
| 256.65 | -1.301 |
| 256.82 | -1.303 |
| 256.98 | -1.305 |
| 257.15 | -1.311 |
| 257.32 | -1.321 |
| 257.49 | -1.33  |
| 257.66 | -1.338 |
| 257.83 | -1.343 |
| 257.99 | -1.348 |
| 258.16 | -1.354 |
| 258.33 | -1.359 |
| 258.5  | -1.363 |
| 258.67 | -1.368 |
| 258.84 | -1.373 |
| 259    | -1.38  |
| 259.17 | -1.385 |
| 259.34 | -1.385 |
| 259.51 | -1.384 |
| 259.68 | -1.388 |
| 259.85 | -1.394 |
| 260.01 | -1.401 |
| 260.18 | -1.401 |
| 260.35 | -1.402 |
| 260.52 | -1.406 |
| 260.69 | -1.417 |
| 260.86 | -1.43  |
| 261.02 | -1.439 |
| 261.19 | -1.442 |
| 261.36 | -1.445 |
| 261.53 | -1.452 |
| 261.7  | -1.459 |
| 261.87 | -1.463 |
| 262.04 | -1.464 |
| 262.2  | -1.471 |
| 262.37 | -1.481 |
| 262.54 | -1.487 |
| 262.71 | -1.49  |
| 262.88 | -1.493 |
| 263.05 | -1.501 |
| 263.21 | -1.51  |
| 263.38 | -1.518 |
| 263.55 | -1.521 |
| 263.72 | -1.525 |
| 263.89 | -1.529 |
| 264.06 | -1.54  |
| 264.22 | -1.55  |
| 264.39 | -1.556 |
| 264.56 | -1.558 |
| 264.73 | -1.561 |
| 264.9  | -1.568 |

|        |        |
|--------|--------|
| 265.07 | -1.574 |
| 265.23 | -1.58  |
| 265.4  | -1.591 |
| 265.57 | -1.603 |
| 265.74 | -1.612 |
| 265.91 | -1.615 |
| 266.08 | -1.618 |
| 266.24 | -1.624 |
| 266.41 | -1.63  |
| 266.58 | -1.638 |
| 266.75 | -1.644 |
| 266.92 | -1.651 |
| 267.09 | -1.658 |
| 267.26 | -1.665 |
| 267.42 | -1.672 |
| 267.59 | -1.677 |
| 267.76 | -1.683 |
| 267.93 | -1.692 |
| 268.1  | -1.705 |
| 268.27 | -1.712 |
| 268.43 | -1.717 |
| 268.6  | -1.718 |
| 268.77 | -1.726 |
| 268.94 | -1.735 |
| 269.11 | -1.745 |
| 269.28 | -1.748 |
| 269.45 | -1.749 |
| 269.61 | -1.752 |
| 269.78 | -1.758 |
| 269.95 | -1.764 |
| 270.12 | -1.769 |
| 270.29 | -1.778 |
| 270.46 | -1.792 |
| 270.63 | -1.806 |
| 270.79 | -1.812 |
| 270.96 | -1.814 |
| 271.13 | -1.822 |
| 271.3  | -1.833 |
| 271.47 | -1.842 |
| 271.64 | -1.843 |
| 271.81 | -1.843 |
| 271.97 | -1.85  |
| 272.14 | -1.86  |
| 272.31 | -1.872 |
| 272.48 | -1.88  |
| 272.65 | -1.882 |
| 272.82 | -1.886 |
| 272.99 | -1.895 |
| 273.15 | -1.908 |
| 273.32 | -1.918 |
| 273.49 | -1.92  |
| 273.66 | -1.925 |
| 273.83 | -1.932 |
| 274    | -1.941 |

|        |        |
|--------|--------|
| 274.17 | -1.947 |
| 274.33 | -1.951 |
| 274.5  | -1.956 |
| 274.67 | -1.962 |
| 274.84 | -1.969 |
| 275.01 | -1.976 |
| 275.18 | -1.98  |
| 275.35 | -1.984 |
| 275.52 | -1.99  |
| 275.68 | -1.999 |
| 275.85 | -2.01  |
| 276.02 | -2.017 |
| 276.19 | -2.022 |
| 276.36 | -2.027 |
| 276.53 | -2.032 |
| 276.7  | -2.037 |
| 276.86 | -2.045 |
| 277.03 | -2.053 |
| 277.2  | -2.062 |
| 277.37 | -2.07  |
| 277.54 | -2.079 |
| 277.71 | -2.086 |
| 277.88 | -2.095 |
| 278.05 | -2.103 |
| 278.22 | -2.11  |
| 278.38 | -2.116 |
| 278.55 | -2.121 |
| 278.72 | -2.126 |
| 278.89 | -2.129 |
| 279.06 | -2.131 |
| 279.23 | -2.133 |
| 279.4  | -2.139 |
| 279.57 | -2.149 |
| 279.73 | -2.155 |
| 279.9  | -2.159 |
| 280.07 | -2.166 |
| 280.24 | -2.177 |
| 280.41 | -2.187 |
| 280.58 | -2.193 |
| 280.75 | -2.196 |
| 280.92 | -2.201 |
| 281.08 | -2.208 |
| 281.25 | -2.215 |
| 281.42 | -2.22  |
| 281.59 | -2.224 |
| 281.76 | -2.228 |
| 281.93 | -2.23  |
| 282.1  | -2.235 |
| 282.27 | -2.239 |
| 282.44 | -2.245 |
| 282.61 | -2.247 |
| 282.77 | -2.25  |
| 282.94 | -2.254 |
| 283.11 | -2.264 |

|        |        |
|--------|--------|
| 283.28 | -2.273 |
| 283.45 | -2.278 |
| 283.62 | -2.28  |
| 283.79 | -2.283 |
| 283.96 | -2.29  |
| 284.13 | -2.299 |
| 284.29 | -2.303 |
| 284.46 | -2.305 |
| 284.63 | -2.308 |
| 284.8  | -2.316 |
| 284.97 | -2.322 |
| 285.14 | -2.326 |
| 285.31 | -2.329 |
| 285.48 | -2.333 |
| 285.65 | -2.337 |
| 285.82 | -2.344 |
| 285.98 | -2.346 |
| 286.15 | -2.345 |
| 286.32 | -2.341 |
| 286.49 | -2.342 |
| 286.66 | -2.349 |
| 286.83 | -2.355 |
| 287    | -2.359 |
| 287.17 | -2.36  |
| 287.34 | -2.365 |
| 287.51 | -2.372 |
| 287.67 | -2.38  |
| 287.84 | -2.381 |
| 288.01 | -2.381 |
| 288.18 | -2.379 |
| 288.35 | -2.382 |
| 288.52 | -2.384 |
| 288.69 | -2.388 |
| 288.86 | -2.386 |
| 289.03 | -2.387 |
| 289.2  | -2.387 |
| 289.37 | -2.391 |
| 289.54 | -2.391 |
| 289.71 | -2.392 |
| 289.87 | -2.392 |
| 290.04 | -2.394 |
| 290.21 | -2.396 |
| 290.38 | -2.396 |
| 290.55 | -2.397 |
| 290.72 | -2.4   |
| 290.89 | -2.401 |
| 291.06 | -2.401 |
| 291.23 | -2.4   |
| 291.4  | -2.4   |
| 291.57 | -2.401 |
| 291.74 | -2.4   |
| 291.91 | -2.399 |
| 292.07 | -2.401 |
| 292.24 | -2.402 |

|        |        |
|--------|--------|
| 292.41 | -2.404 |
| 292.58 | -2.403 |
| 292.75 | -2.401 |
| 292.92 | -2.401 |
| 293.09 | -2.398 |
| 293.26 | -2.397 |
| 293.43 | -2.393 |
| 293.6  | -2.393 |
| 293.77 | -2.395 |
| 293.94 | -2.395 |
| 294.11 | -2.396 |
| 294.27 | -2.397 |
| 294.44 | -2.396 |
| 294.61 | -2.393 |
| 294.78 | -2.391 |
| 294.95 | -2.392 |
| 295.12 | -2.391 |
| 295.29 | -2.386 |
| 295.46 | -2.385 |
| 295.63 | -2.386 |
| 295.8  | -2.389 |
| 295.97 | -2.386 |
| 296.14 | -2.377 |
| 296.31 | -2.371 |
| 296.48 | -2.371 |
| 296.65 | -2.374 |
| 296.82 | -2.371 |
| 296.99 | -2.362 |
| 297.16 | -2.357 |
| 297.33 | -2.354 |
| 297.5  | -2.355 |
| 297.67 | -2.354 |
| 297.83 | -2.352 |
| 298    | -2.35  |
| 298.17 | -2.348 |
| 298.34 | -2.346 |
| 298.51 | -2.342 |
| 298.68 | -2.34  |
| 298.85 | -2.338 |
| 299.02 | -2.335 |
| 299.19 | -2.333 |
| 299.36 | -2.327 |
| 299.53 | -2.323 |
| 299.7  | -2.315 |
| 299.87 | -2.312 |
| 300.04 | -2.311 |
| 300.21 | -2.309 |
| 300.38 | -2.301 |
| 300.55 | -2.29  |
| 300.72 | -2.279 |
| 300.89 | -2.277 |
| 301.06 | -2.274 |
| 301.23 | -2.269 |
| 301.4  | -2.261 |

|         |         |
|---------|---------|
| 301. 57 | -2. 255 |
| 301. 74 | -2. 254 |
| 301. 91 | -2. 252 |
| 302. 08 | -2. 248 |
| 302. 25 | -2. 241 |
| 302. 42 | -2. 232 |
| 302. 59 | -2. 225 |
| 302. 76 | -2. 216 |
| 302. 93 | -2. 207 |
| 303. 1  | -2. 194 |
| 303. 27 | -2. 189 |
| 303. 44 | -2. 184 |
| 303. 61 | -2. 18  |
| 303. 78 | -2. 173 |
| 303. 95 | -2. 167 |
| 304. 12 | -2. 16  |
| 304. 29 | -2. 154 |
| 304. 46 | -2. 15  |
| 304. 63 | -2. 146 |
| 304. 8  | -2. 14  |
| 304. 97 | -2. 13  |
| 305. 14 | -2. 121 |
| 305. 31 | -2. 113 |
| 305. 48 | -2. 108 |
| 305. 65 | -2. 103 |
| 305. 82 | -2. 095 |
| 305. 99 | -2. 084 |
| 306. 16 | -2. 074 |
| 306. 33 | -2. 064 |
| 306. 5  | -2. 056 |
| 306. 67 | -2. 047 |
| 306. 84 | -2. 042 |
| 307. 01 | -2. 036 |
| 307. 18 | -2. 031 |
| 307. 35 | -2. 022 |
| 307. 52 | -2. 012 |
| 307. 69 | -2. 004 |
| 307. 86 | -1. 997 |
| 308. 03 | -1. 989 |
| 308. 2  | -1. 98  |
| 308. 37 | -1. 976 |
| 308. 54 | -1. 972 |
| 308. 71 | -1. 967 |
| 308. 88 | -1. 959 |
| 309. 05 | -1. 953 |
| 309. 22 | -1. 946 |
| 309. 39 | -1. 936 |
| 309. 56 | -1. 923 |
| 309. 73 | -1. 914 |
| 309. 9  | -1. 91  |
| 310. 07 | -1. 906 |
| 310. 24 | -1. 896 |
| 310. 41 | -1. 885 |
| 310. 58 | -1. 879 |

|        |        |
|--------|--------|
| 310.75 | -1.876 |
| 310.92 | -1.87  |
| 311.09 | -1.862 |
| 311.26 | -1.852 |
| 311.43 | -1.848 |
| 311.6  | -1.848 |
| 311.77 | -1.848 |
| 311.94 | -1.84  |
| 312.11 | -1.83  |
| 312.28 | -1.82  |
| 312.45 | -1.814 |
| 312.62 | -1.805 |
| 312.79 | -1.795 |
| 312.96 | -1.784 |
| 313.13 | -1.776 |
| 313.3  | -1.773 |
| 313.47 | -1.772 |
| 313.64 | -1.768 |
| 313.82 | -1.76  |
| 313.99 | -1.753 |
| 314.16 | -1.75  |
| 314.33 | -1.747 |
| 314.5  | -1.741 |
| 314.67 | -1.733 |
| 314.84 | -1.725 |
| 315.01 | -1.722 |
| 315.18 | -1.72  |
| 315.35 | -1.716 |
| 315.52 | -1.705 |
| 315.69 | -1.693 |
| 315.86 | -1.685 |
| 316.03 | -1.682 |
| 316.2  | -1.679 |
| 316.37 | -1.672 |
| 316.54 | -1.662 |
| 316.71 | -1.656 |
| 316.88 | -1.655 |
| 317.05 | -1.651 |
| 317.22 | -1.642 |
| 317.4  | -1.63  |
| 317.57 | -1.627 |
| 317.74 | -1.626 |
| 317.91 | -1.626 |
| 318.08 | -1.625 |
| 318.25 | -1.625 |
| 318.42 | -1.622 |
| 318.59 | -1.617 |
| 318.76 | -1.611 |
| 318.93 | -1.606 |
| 319.1  | -1.602 |
| 319.27 | -1.598 |
| 319.44 | -1.594 |
| 319.61 | -1.591 |
| 319.79 | -1.588 |



|        |        |
|--------|--------|
| 319.96 | -1.588 |
| 320.13 | -1.584 |
| 320.3  | -1.578 |
| 320.47 | -1.57  |
| 320.64 | -1.564 |
| 320.81 | -1.561 |
| 320.98 | -1.562 |
| 321.15 | -1.558 |
| 321.32 | -1.556 |
| 321.49 | -1.551 |
| 321.66 | -1.546 |
| 321.84 | -1.539 |
| 322.01 | -1.532 |
| 322.18 | -1.525 |
| 322.35 | -1.519 |
| 322.52 | -1.514 |
| 322.69 | -1.507 |
| 322.86 | -1.502 |
| 323.03 | -1.499 |
| 323.2  | -1.5   |
| 323.37 | -1.501 |
| 323.54 | -1.502 |
| 323.72 | -1.5   |
| 323.89 | -1.496 |
| 324.06 | -1.491 |
| 324.23 | -1.487 |
| 324.4  | -1.483 |
| 324.57 | -1.483 |
| 324.74 | -1.481 |
| 324.91 | -1.48  |
| 325.08 | -1.478 |
| 325.25 | -1.478 |
| 325.42 | -1.477 |
| 325.6  | -1.473 |
| 325.77 | -1.468 |
| 325.94 | -1.465 |
| 326.11 | -1.462 |
| 326.28 | -1.458 |
| 326.45 | -1.452 |
| 326.62 | -1.445 |
| 326.79 | -1.439 |
| 326.96 | -1.434 |
| 327.14 | -1.431 |
| 327.31 | -1.427 |
| 327.48 | -1.427 |
| 327.65 | -1.426 |
| 327.82 | -1.425 |
| 327.99 | -1.422 |
| 328.16 | -1.416 |
| 328.33 | -1.408 |
| 328.5  | -1.399 |
| 328.67 | -1.393 |
| 328.84 | -1.388 |
| 329.02 | -1.386 |

|        |        |
|--------|--------|
| 329.19 | -1.386 |
| 329.36 | -1.389 |
| 329.53 | -1.391 |
| 329.7  | -1.387 |
| 329.87 | -1.382 |
| 330.04 | -1.377 |
| 330.21 | -1.375 |
| 330.38 | -1.375 |
| 330.55 | -1.372 |
| 330.72 | -1.37  |
| 330.89 | -1.365 |
| 331.06 | -1.363 |
| 331.24 | -1.362 |
| 331.41 | -1.363 |
| 331.58 | -1.361 |
| 331.75 | -1.358 |
| 331.92 | -1.356 |
| 332.09 | -1.354 |
| 332.26 | -1.348 |
| 332.43 | -1.341 |
| 332.6  | -1.335 |
| 332.77 | -1.336 |
| 332.94 | -1.338 |
| 333.11 | -1.34  |
| 333.28 | -1.336 |
| 333.45 | -1.329 |
| 333.62 | -1.324 |
| 333.79 | -1.323 |
| 333.96 | -1.322 |
| 334.13 | -1.319 |
| 334.3  | -1.316 |
| 334.48 | -1.313 |
| 334.65 | -1.312 |
| 334.82 | -1.308 |
| 334.99 | -1.304 |
| 335.16 | -1.301 |
| 335.33 | -1.301 |
| 335.5  | -1.301 |
| 335.67 | -1.303 |
| 335.84 | -1.303 |
| 336.01 | -1.301 |
| 336.18 | -1.298 |
| 336.35 | -1.295 |
| 336.52 | -1.292 |
| 336.69 | -1.287 |
| 336.86 | -1.286 |
| 337.03 | -1.289 |
| 337.2  | -1.295 |
| 337.37 | -1.296 |
| 337.54 | -1.294 |
| 337.71 | -1.289 |
| 337.88 | -1.284 |
| 338.06 | -1.277 |
| 338.23 | -1.27  |

|        |        |
|--------|--------|
| 338.4  | -1.267 |
| 338.57 | -1.268 |
| 338.74 | -1.268 |
| 338.91 | -1.268 |
| 339.08 | -1.267 |
| 339.25 | -1.271 |
| 339.42 | -1.271 |
| 339.59 | -1.27  |
| 339.76 | -1.266 |
| 339.93 | -1.264 |
| 340.1  | -1.26  |
| 340.27 | -1.258 |
| 340.44 | -1.256 |
| 340.61 | -1.253 |
| 340.78 | -1.25  |
| 340.96 | -1.245 |
| 341.13 | -1.242 |
| 341.3  | -1.24  |
| 341.47 | -1.237 |
| 341.64 | -1.232 |
| 341.81 | -1.23  |
| 341.98 | -1.229 |
| 342.15 | -1.23  |
| 342.32 | -1.23  |
| 342.49 | -1.23  |
| 342.66 | -1.229 |
| 342.83 | -1.227 |
| 343    | -1.226 |
| 343.17 | -1.226 |
| 343.34 | -1.227 |
| 343.51 | -1.228 |
| 343.68 | -1.225 |
| 343.85 | -1.223 |
| 344.03 | -1.222 |
| 344.2  | -1.221 |
| 344.37 | -1.218 |
| 344.54 | -1.215 |
| 344.71 | -1.213 |
| 344.88 | -1.211 |
| 345.05 | -1.21  |
| 345.22 | -1.21  |
| 345.39 | -1.211 |
| 345.56 | -1.21  |
| 345.73 | -1.205 |
| 345.9  | -1.201 |
| 346.07 | -1.197 |
| 346.24 | -1.196 |
| 346.42 | -1.194 |
| 346.59 | -1.192 |
| 346.76 | -1.192 |
| 346.93 | -1.195 |
| 347.1  | -1.196 |
| 347.27 | -1.194 |
| 347.44 | -1.194 |

|        |        |
|--------|--------|
| 347.61 | -1.195 |
| 347.78 | -1.195 |
| 347.95 | -1.191 |
| 348.12 | -1.188 |
| 348.29 | -1.187 |
| 348.46 | -1.191 |
| 348.64 | -1.194 |
| 348.81 | -1.196 |
| 348.98 | -1.193 |
| 349.15 | -1.19  |
| 349.32 | -1.19  |
| 349.49 | -1.193 |
| 349.66 | -1.198 |
| 349.83 | -1.203 |
| 350    | -1.206 |
| 350.17 | -1.208 |
| 350.35 | -1.209 |
| 350.52 | -1.211 |
| 350.69 | -1.213 |
| 350.86 | -1.212 |
| 351.03 | -1.21  |
| 351.2  | -1.208 |
| 351.37 | -1.21  |
| 351.54 | -1.214 |
| 351.71 | -1.217 |
| 351.88 | -1.218 |
| 352.06 | -1.217 |
| 352.23 | -1.219 |
| 352.4  | -1.222 |
| 352.57 | -1.225 |
| 352.74 | -1.227 |
| 352.91 | -1.227 |
| 353.08 | -1.229 |
| 353.25 | -1.229 |
| 353.42 | -1.229 |
| 353.59 | -1.229 |
| 353.76 | -1.229 |
| 353.93 | -1.229 |
| 354.11 | -1.231 |
| 354.28 | -1.235 |
| 354.45 | -1.242 |
| 354.62 | -1.245 |
| 354.79 | -1.247 |
| 354.96 | -1.247 |
| 355.13 | -1.251 |
| 355.3  | -1.258 |
| 355.47 | -1.262 |
| 355.64 | -1.262 |
| 355.81 | -1.261 |
| 355.98 | -1.266 |
| 356.15 | -1.272 |
| 356.33 | -1.277 |
| 356.5  | -1.278 |
| 356.67 | -1.278 |

|        |        |
|--------|--------|
| 356.84 | -1.283 |
| 357.01 | -1.292 |
| 357.18 | -1.296 |
| 357.35 | -1.297 |
| 357.52 | -1.297 |
| 357.69 | -1.305 |
| 357.86 | -1.316 |
| 358.03 | -1.323 |
| 358.21 | -1.324 |
| 358.38 | -1.323 |
| 358.55 | -1.324 |
| 358.72 | -1.329 |
| 358.89 | -1.335 |
| 359.06 | -1.341 |
| 359.23 | -1.344 |
| 359.4  | -1.346 |
| 359.57 | -1.351 |
| 359.74 | -1.357 |
| 359.91 | -1.36  |
| 360.08 | -1.359 |
| 360.26 | -1.361 |
| 360.43 | -1.366 |
| 360.6  | -1.371 |
| 360.77 | -1.376 |
| 360.94 | -1.379 |
| 361.11 | -1.385 |
| 361.28 | -1.391 |
| 361.45 | -1.396 |
| 361.62 | -1.399 |
| 361.79 | -1.4   |
| 361.96 | -1.404 |
| 362.14 | -1.412 |
| 362.31 | -1.423 |
| 362.48 | -1.431 |
| 362.65 | -1.434 |
| 362.82 | -1.437 |
| 362.99 | -1.442 |
| 363.16 | -1.45  |
| 363.33 | -1.455 |
| 363.5  | -1.46  |
| 363.67 | -1.465 |
| 363.84 | -1.472 |
| 364.02 | -1.479 |
| 364.19 | -1.485 |
| 364.36 | -1.489 |
| 364.53 | -1.493 |
| 364.7  | -1.496 |
| 364.87 | -1.502 |
| 365.04 | -1.506 |
| 365.21 | -1.508 |
| 365.38 | -1.507 |
| 365.55 | -1.505 |
| 365.72 | -1.509 |
| 365.9  | -1.515 |

|        |        |
|--------|--------|
| 366.07 | -1.522 |
| 366.24 | -1.529 |
| 366.41 | -1.534 |
| 366.58 | -1.536 |
| 366.75 | -1.538 |
| 366.92 | -1.541 |
| 367.09 | -1.544 |
| 367.26 | -1.546 |
| 367.43 | -1.549 |
| 367.6  | -1.551 |
| 367.77 | -1.552 |
| 367.94 | -1.55  |
| 368.12 | -1.553 |
| 368.29 | -1.555 |
| 368.46 | -1.56  |
| 368.63 | -1.566 |
| 368.8  | -1.571 |
| 368.97 | -1.573 |
| 369.14 | -1.576 |
| 369.31 | -1.58  |
| 369.48 | -1.585 |
| 369.65 | -1.585 |
| 369.82 | -1.584 |
| 369.99 | -1.586 |
| 370.16 | -1.592 |
| 370.33 | -1.599 |
| 370.51 | -1.605 |
| 370.68 | -1.605 |
| 370.85 | -1.605 |
| 371.02 | -1.603 |
| 371.19 | -1.605 |
| 371.36 | -1.607 |
| 371.53 | -1.606 |
| 371.7  | -1.605 |
| 371.87 | -1.604 |
| 372.04 | -1.606 |
| 372.21 | -1.608 |
| 372.38 | -1.609 |
| 372.55 | -1.605 |
| 372.72 | -1.603 |
| 372.89 | -1.602 |
| 373.06 | -1.603 |
| 373.24 | -1.603 |
| 373.41 | -1.602 |
| 373.58 | -1.6   |
| 373.75 | -1.601 |
| 373.92 | -1.604 |
| 374.09 | -1.607 |
| 374.26 | -1.611 |
| 374.43 | -1.61  |
| 374.6  | -1.611 |
| 374.77 | -1.609 |
| 374.94 | -1.605 |
| 375.11 | -1.602 |

|        |        |
|--------|--------|
| 375.28 | -1.6   |
| 375.45 | -1.602 |
| 375.62 | -1.603 |
| 375.79 | -1.605 |
| 375.96 | -1.605 |
| 376.13 | -1.603 |
| 376.3  | -1.602 |
| 376.47 | -1.601 |
| 376.64 | -1.601 |
| 376.81 | -1.601 |
| 376.99 | -1.602 |
| 377.16 | -1.602 |
| 377.33 | -1.598 |
| 377.5  | -1.593 |
| 377.67 | -1.589 |
| 377.84 | -1.585 |
| 378.01 | -1.582 |
| 378.18 | -1.579 |
| 378.35 | -1.577 |
| 378.52 | -1.573 |
| 378.69 | -1.567 |
| 378.86 | -1.561 |
| 379.03 | -1.558 |
| 379.2  | -1.555 |
| 379.37 | -1.55  |
| 379.54 | -1.548 |
| 379.71 | -1.548 |
| 379.88 | -1.547 |
| 380.05 | -1.547 |
| 380.22 | -1.544 |
| 380.39 | -1.541 |
| 380.56 | -1.539 |
| 380.73 | -1.539 |
| 380.9  | -1.537 |
| 381.07 | -1.533 |
| 381.24 | -1.532 |
| 381.41 | -1.532 |
| 381.58 | -1.531 |
| 381.75 | -1.529 |
| 381.92 | -1.528 |
| 382.09 | -1.525 |
| 382.26 | -1.517 |
| 382.43 | -1.506 |
| 382.6  | -1.499 |
| 382.77 | -1.496 |
| 382.94 | -1.492 |
| 383.11 | -1.487 |
| 383.28 | -1.481 |
| 383.45 | -1.48  |
| 383.62 | -1.478 |
| 383.79 | -1.472 |
| 383.96 | -1.464 |
| 384.13 | -1.456 |
| 384.3  | -1.452 |

|        |        |
|--------|--------|
| 384.47 | -1.447 |
| 384.64 | -1.442 |
| 384.81 | -1.434 |
| 384.98 | -1.429 |
| 385.15 | -1.425 |
| 385.32 | -1.422 |
| 385.49 | -1.418 |
| 385.66 | -1.41  |
| 385.83 | -1.399 |
| 386    | -1.393 |
| 386.18 | -1.392 |
| 386.34 | -1.391 |
| 386.51 | -1.386 |
| 386.68 | -1.378 |
| 386.85 | -1.373 |
| 387.02 | -1.37  |
| 387.19 | -1.368 |
| 387.36 | -1.365 |
| 387.53 | -1.358 |
| 387.7  | -1.35  |
| 387.87 | -1.341 |
| 388.04 | -1.338 |
| 388.21 | -1.33  |
| 388.38 | -1.318 |
| 388.55 | -1.308 |
| 388.72 | -1.305 |
| 388.89 | -1.306 |
| 389.06 | -1.303 |
| 389.23 | -1.295 |
| 389.4  | -1.287 |
| 389.57 | -1.282 |
| 389.74 | -1.279 |
| 389.91 | -1.271 |
| 390.08 | -1.262 |
| 390.25 | -1.252 |
| 390.42 | -1.245 |
| 390.59 | -1.237 |
| 390.76 | -1.232 |
| 390.93 | -1.228 |
| 391.1  | -1.226 |
| 391.27 | -1.224 |
| 391.44 | -1.22  |
| 391.61 | -1.216 |
| 391.78 | -1.21  |
| 391.95 | -1.204 |
| 392.12 | -1.195 |
| 392.29 | -1.19  |
| 392.46 | -1.187 |
| 392.63 | -1.186 |
| 392.8  | -1.183 |
| 392.97 | -1.175 |
| 393.14 | -1.169 |
| 393.31 | -1.164 |
| 393.48 | -1.16  |



|        |        |
|--------|--------|
| 393.64 | -1.154 |
| 393.81 | -1.149 |
| 393.98 | -1.146 |
| 394.15 | -1.144 |
| 394.32 | -1.142 |
| 394.49 | -1.139 |
| 394.66 | -1.137 |
| 394.83 | -1.134 |
| 395    | -1.131 |
| 395.17 | -1.129 |
| 395.34 | -1.129 |
| 395.51 | -1.127 |
| 395.68 | -1.125 |
| 395.85 | -1.123 |
| 396.02 | -1.122 |
| 396.19 | -1.124 |
| 396.36 | -1.125 |
| 396.53 | -1.127 |
| 396.7  | -1.125 |
| 396.87 | -1.124 |
| 397.04 | -1.124 |
| 397.21 | -1.123 |
| 397.37 | -1.118 |
| 397.54 | -1.11  |
| 397.71 | -1.107 |
| 397.88 | -1.108 |
| 398.05 | -1.108 |
| 398.22 | -1.108 |
| 398.39 | -1.108 |
| 398.56 | -1.11  |
| 398.73 | -1.11  |
| 398.9  | -1.11  |
| 399.07 | -1.114 |
| 399.24 | -1.117 |
| 399.41 | -1.118 |
| 399.58 | -1.118 |
| 399.75 | -1.117 |
| 399.91 | -1.117 |
| 400.08 | -1.117 |
| 400.25 | -1.117 |
| 400.42 | -1.119 |
| 400.59 | -1.118 |
| 400.76 | -1.117 |
| 400.93 | -1.115 |
| 401.1  | -1.114 |
| 401.27 | -1.113 |
| 401.44 | -1.113 |
| 401.61 | -1.115 |
| 401.78 | -1.119 |
| 401.95 | -1.123 |
| 402.12 | -1.124 |
| 402.29 | -1.124 |
| 402.45 | -1.122 |
| 402.62 | -1.121 |

|        |        |
|--------|--------|
| 402.79 | -1.122 |
| 402.96 | -1.123 |
| 403.13 | -1.124 |
| 403.3  | -1.124 |
| 403.47 | -1.124 |
| 403.64 | -1.125 |
| 403.81 | -1.127 |
| 403.98 | -1.127 |
| 404.15 | -1.127 |
| 404.32 | -1.126 |
| 404.49 | -1.125 |
| 404.66 | -1.125 |
| 404.82 | -1.122 |
| 404.99 | -1.121 |
| 405.16 | -1.123 |
| 405.33 | -1.128 |
| 405.5  | -1.133 |
| 405.67 | -1.134 |
| 405.84 | -1.134 |
| 406.01 | -1.137 |
| 406.18 | -1.141 |
| 406.35 | -1.143 |
| 406.52 | -1.143 |
| 406.69 | -1.146 |
| 406.86 | -1.151 |
| 407.03 | -1.157 |
| 407.19 | -1.16  |
| 407.36 | -1.163 |
| 407.53 | -1.166 |
| 407.7  | -1.17  |
| 407.87 | -1.175 |
| 408.04 | -1.178 |
| 408.21 | -1.181 |
| 408.38 | -1.189 |
| 408.55 | -1.196 |
| 408.72 | -1.202 |
| 408.89 | -1.204 |
| 409.06 | -1.206 |
| 409.23 | -1.211 |
| 409.39 | -1.218 |
| 409.56 | -1.226 |
| 409.73 | -1.232 |
| 409.9  | -1.24  |
| 410.07 | -1.249 |
| 410.24 | -1.257 |
| 410.41 | -1.263 |
| 410.58 | -1.269 |
| 410.75 | -1.278 |
| 410.92 | -1.29  |
| 411.09 | -1.303 |
| 411.26 | -1.311 |
| 411.43 | -1.317 |
| 411.59 | -1.324 |
| 411.76 | -1.335 |

|        |        |
|--------|--------|
| 411.93 | -1.347 |
| 412.1  | -1.356 |
| 412.27 | -1.362 |
| 412.44 | -1.367 |
| 412.61 | -1.374 |
| 412.78 | -1.384 |
| 412.95 | -1.395 |
| 413.12 | -1.403 |
| 413.28 | -1.411 |
| 413.45 | -1.424 |
| 413.62 | -1.434 |
| 413.79 | -1.44  |
| 413.96 | -1.443 |
| 414.13 | -1.452 |
| 414.3  | -1.465 |
| 414.47 | -1.476 |
| 414.64 | -1.484 |
| 414.81 | -1.489 |
| 414.98 | -1.497 |
| 415.14 | -1.502 |
| 415.31 | -1.504 |
| 415.48 | -1.502 |
| 415.65 | -1.502 |
| 415.82 | -1.506 |
| 415.99 | -1.514 |
| 416.16 | -1.52  |
| 416.33 | -1.521 |
| 416.5  | -1.523 |
| 416.67 | -1.526 |
| 416.84 | -1.533 |
| 417    | -1.539 |
| 417.17 | -1.542 |
| 417.34 | -1.545 |
| 417.51 | -1.55  |
| 417.68 | -1.555 |
| 417.85 | -1.559 |
| 418.02 | -1.564 |
| 418.19 | -1.566 |
| 418.36 | -1.564 |
| 418.53 | -1.563 |
| 418.69 | -1.563 |
| 418.86 | -1.568 |
| 419.03 | -1.571 |
| 419.2  | -1.573 |
| 419.37 | -1.574 |
| 419.54 | -1.573 |
| 419.71 | -1.572 |
| 419.88 | -1.572 |
| 420.05 | -1.573 |
| 420.21 | -1.575 |
| 420.38 | -1.573 |
| 420.55 | -1.57  |
| 420.72 | -1.568 |
| 420.89 | -1.569 |

|        |        |
|--------|--------|
| 421.06 | -1.571 |
| 421.23 | -1.574 |
| 421.4  | -1.574 |
| 421.57 | -1.572 |
| 421.73 | -1.57  |
| 421.9  | -1.567 |
| 422.07 | -1.562 |
| 422.24 | -1.56  |
| 422.41 | -1.56  |
| 422.58 | -1.561 |
| 422.75 | -1.558 |
| 422.92 | -1.553 |
| 423.09 | -1.553 |
| 423.25 | -1.556 |
| 423.42 | -1.559 |
| 423.59 | -1.559 |
| 423.76 | -1.559 |
| 423.93 | -1.56  |
| 424.1  | -1.563 |
| 424.27 | -1.566 |
| 424.44 | -1.566 |
| 424.61 | -1.567 |
| 424.77 | -1.57  |
| 424.94 | -1.577 |
| 425.11 | -1.584 |
| 425.28 | -1.586 |
| 425.45 | -1.587 |
| 425.62 | -1.585 |
| 425.79 | -1.583 |
| 425.96 | -1.578 |
| 426.13 | -1.576 |
| 426.29 | -1.574 |
| 426.46 | -1.578 |
| 426.63 | -1.58  |
| 426.8  | -1.585 |
| 426.97 | -1.59  |
| 427.14 | -1.595 |
| 427.31 | -1.597 |
| 427.48 | -1.596 |
| 427.65 | -1.595 |
| 427.82 | -1.595 |
| 427.99 | -1.594 |
| 428.16 | -1.593 |
| 428.32 | -1.594 |
| 428.49 | -1.596 |
| 428.66 | -1.599 |
| 428.83 | -1.599 |
| 429    | -1.599 |
| 429.17 | -1.601 |
| 429.34 | -1.603 |
| 429.51 | -1.604 |
| 429.68 | -1.606 |
| 429.85 | -1.609 |
| 430.02 | -1.61  |

|        |        |
|--------|--------|
| 430.19 | -1.61  |
| 430.36 | -1.612 |
| 430.53 | -1.615 |
| 430.7  | -1.616 |
| 430.87 | -1.618 |
| 431.04 | -1.618 |
| 431.21 | -1.617 |
| 431.38 | -1.616 |
| 431.55 | -1.616 |
| 431.72 | -1.618 |
| 431.89 | -1.616 |
| 432.06 | -1.616 |
| 432.23 | -1.613 |
| 432.4  | -1.614 |
| 432.57 | -1.614 |
| 432.74 | -1.618 |
| 432.92 | -1.618 |
| 433.09 | -1.619 |
| 433.26 | -1.618 |
| 433.43 | -1.616 |
| 433.6  | -1.612 |
| 433.77 | -1.603 |
| 433.94 | -1.598 |
| 434.11 | -1.594 |
| 434.28 | -1.594 |
| 434.45 | -1.593 |
| 434.62 | -1.596 |
| 434.79 | -1.596 |
| 434.96 | -1.596 |
| 435.13 | -1.591 |
| 435.3  | -1.586 |
| 435.47 | -1.581 |
| 435.64 | -1.577 |
| 435.82 | -1.573 |
| 435.99 | -1.569 |
| 436.16 | -1.566 |
| 436.33 | -1.562 |
| 436.5  | -1.558 |
| 436.67 | -1.556 |
| 436.84 | -1.554 |
| 437.01 | -1.551 |
| 437.18 | -1.548 |
| 437.35 | -1.543 |
| 437.52 | -1.537 |
| 437.69 | -1.53  |
| 437.87 | -1.524 |
| 438.04 | -1.521 |
| 438.21 | -1.516 |
| 438.38 | -1.505 |
| 438.55 | -1.492 |
| 438.72 | -1.484 |
| 438.89 | -1.481 |
| 439.06 | -1.478 |
| 439.23 | -1.473 |

|        |        |
|--------|--------|
| 439.4  | -1.467 |
| 439.57 | -1.46  |
| 439.74 | -1.458 |
| 439.92 | -1.455 |
| 440.09 | -1.45  |
| 440.26 | -1.442 |
| 440.43 | -1.43  |
| 440.6  | -1.423 |
| 440.77 | -1.416 |
| 440.94 | -1.411 |
| 441.11 | -1.405 |
| 441.28 | -1.398 |
| 441.45 | -1.388 |
| 441.62 | -1.381 |
| 441.8  | -1.372 |
| 441.97 | -1.361 |
| 442.14 | -1.348 |
| 442.31 | -1.338 |
| 442.48 | -1.333 |
| 442.65 | -1.329 |
| 442.82 | -1.322 |
| 442.99 | -1.31  |
| 443.16 | -1.301 |
| 443.33 | -1.294 |
| 443.5  | -1.29  |
| 443.68 | -1.284 |
| 443.85 | -1.276 |
| 444.02 | -1.267 |
| 444.19 | -1.258 |
| 444.36 | -1.251 |
| 444.53 | -1.241 |
| 444.7  | -1.231 |
| 444.87 | -1.222 |
| 445.04 | -1.217 |
| 445.21 | -1.212 |
| 445.38 | -1.205 |
| 445.56 | -1.197 |
| 445.73 | -1.189 |
| 445.9  | -1.179 |
| 446.07 | -1.17  |
| 446.24 | -1.163 |
| 446.41 | -1.159 |
| 446.58 | -1.153 |
| 446.75 | -1.145 |
| 446.92 | -1.14  |
| 447.09 | -1.139 |
| 447.27 | -1.137 |
| 447.44 | -1.13  |
| 447.61 | -1.12  |
| 447.78 | -1.111 |
| 447.95 | -1.105 |
| 448.12 | -1.1   |
| 448.29 | -1.093 |
| 448.46 | -1.084 |

|        |        |
|--------|--------|
| 448.63 | -1.075 |
| 448.81 | -1.07  |
| 448.98 | -1.067 |
| 449.15 | -1.062 |
| 449.32 | -1.052 |
| 449.49 | -1.044 |
| 449.66 | -1.039 |
| 449.83 | -1.033 |
| 450    | -1.026 |
| 450.17 | -1.019 |
| 450.34 | -1.012 |
| 450.51 | -1.006 |
| 450.68 | -1.003 |
| 450.86 | -1     |
| 451.03 | -0.997 |
| 451.2  | -0.993 |
| 451.37 | -0.988 |
| 451.54 | -0.984 |
| 451.71 | -0.982 |
| 451.88 | -0.979 |
| 452.05 | -0.976 |
| 452.22 | -0.969 |
| 452.39 | -0.964 |
| 452.56 | -0.959 |
| 452.73 | -0.957 |
| 452.91 | -0.954 |
| 453.08 | -0.953 |
| 453.25 | -0.949 |
| 453.42 | -0.943 |
| 453.59 | -0.935 |
| 453.76 | -0.928 |
| 453.93 | -0.924 |
| 454.1  | -0.92  |
| 454.27 | -0.916 |
| 454.44 | -0.909 |
| 454.62 | -0.903 |
| 454.79 | -0.897 |
| 454.96 | -0.894 |
| 455.13 | -0.89  |
| 455.3  | -0.885 |
| 455.47 | -0.881 |
| 455.64 | -0.874 |
| 455.81 | -0.869 |
| 455.98 | -0.865 |
| 456.15 | -0.862 |
| 456.32 | -0.86  |
| 456.5  | -0.86  |
| 456.67 | -0.859 |
| 456.84 | -0.854 |
| 457.01 | -0.847 |
| 457.18 | -0.841 |
| 457.35 | -0.838 |
| 457.52 | -0.835 |
| 457.69 | -0.83  |

|        |        |
|--------|--------|
| 457.86 | -0.826 |
| 458.03 | -0.823 |
| 458.2  | -0.821 |
| 458.37 | -0.817 |
| 458.55 | -0.815 |
| 458.72 | -0.812 |
| 458.89 | -0.81  |
| 459.06 | -0.806 |
| 459.23 | -0.806 |
| 459.4  | -0.803 |
| 459.57 | -0.8   |
| 459.74 | -0.794 |
| 459.91 | -0.788 |
| 460.08 | -0.783 |
| 460.26 | -0.779 |
| 460.43 | -0.777 |
| 460.6  | -0.774 |
| 460.77 | -0.771 |
| 460.94 | -0.768 |
| 461.11 | -0.765 |
| 461.28 | -0.763 |
| 461.45 | -0.761 |
| 461.62 | -0.757 |
| 461.79 | -0.751 |
| 461.97 | -0.748 |
| 462.14 | -0.747 |
| 462.31 | -0.749 |
| 462.48 | -0.749 |
| 462.65 | -0.75  |
| 462.82 | -0.75  |
| 462.99 | -0.751 |
| 463.16 | -0.751 |
| 463.33 | -0.751 |
| 463.5  | -0.749 |
| 463.67 | -0.745 |
| 463.84 | -0.741 |
| 464.01 | -0.74  |
| 464.18 | -0.739 |
| 464.36 | -0.739 |
| 464.53 | -0.736 |
| 464.7  | -0.733 |
| 464.87 | -0.731 |
| 465.04 | -0.729 |
| 465.21 | -0.726 |
| 465.38 | -0.722 |
| 465.55 | -0.718 |
| 465.72 | -0.719 |
| 465.89 | -0.72  |
| 466.06 | -0.72  |
| 466.23 | -0.717 |
| 466.4  | -0.712 |
| 466.58 | -0.71  |
| 466.75 | -0.711 |
| 466.92 | -0.712 |



|        |        |
|--------|--------|
| 467.09 | -0.71  |
| 467.26 | -0.704 |
| 467.43 | -0.701 |
| 467.6  | -0.699 |
| 467.77 | -0.698 |
| 467.94 | -0.695 |
| 468.11 | -0.692 |
| 468.28 | -0.69  |
| 468.45 | -0.689 |
| 468.62 | -0.691 |
| 468.8  | -0.691 |
| 468.97 | -0.688 |
| 469.14 | -0.684 |
| 469.31 | -0.681 |
| 469.48 | -0.679 |
| 469.65 | -0.678 |
| 469.82 | -0.677 |
| 469.99 | -0.675 |
| 470.16 | -0.673 |
| 470.33 | -0.672 |
| 470.5  | -0.674 |
| 470.67 | -0.675 |
| 470.84 | -0.674 |
| 471.01 | -0.672 |
| 471.19 | -0.671 |
| 471.36 | -0.667 |
| 471.53 | -0.661 |
| 471.7  | -0.655 |
| 471.87 | -0.653 |
| 472.04 | -0.653 |
| 472.21 | -0.654 |
| 472.38 | -0.655 |
| 472.55 | -0.654 |
| 472.72 | -0.651 |
| 472.89 | -0.648 |
| 473.06 | -0.646 |
| 473.23 | -0.645 |
| 473.4  | -0.643 |
| 473.58 | -0.64  |
| 473.75 | -0.64  |
| 473.92 | -0.64  |
| 474.09 | -0.64  |
| 474.26 | -0.639 |
| 474.43 | -0.637 |
| 474.6  | -0.634 |
| 474.77 | -0.631 |
| 474.94 | -0.63  |
| 475.11 | -0.631 |
| 475.28 | -0.629 |
| 475.45 | -0.627 |
| 475.62 | -0.625 |
| 475.79 | -0.625 |
| 475.96 | -0.625 |
| 476.13 | -0.625 |

|        |        |
|--------|--------|
| 476.31 | -0.625 |
| 476.48 | -0.625 |
| 476.65 | -0.624 |
| 476.82 | -0.623 |
| 476.99 | -0.623 |
| 477.16 | -0.624 |
| 477.33 | -0.626 |
| 477.5  | -0.626 |
| 477.67 | -0.626 |
| 477.84 | -0.623 |
| 478.01 | -0.622 |
| 478.18 | -0.619 |
| 478.35 | -0.617 |
| 478.52 | -0.614 |
| 478.69 | -0.612 |
| 478.86 | -0.611 |
| 479.03 | -0.612 |
| 479.2  | -0.612 |
| 479.38 | -0.613 |
| 479.55 | -0.612 |
| 479.72 | -0.609 |
| 479.89 | -0.605 |
| 480.06 | -0.6   |
| 480.23 | -0.597 |
| 480.4  | -0.596 |
| 480.57 | -0.597 |
| 480.74 | -0.597 |
| 480.91 | -0.596 |
| 481.08 | -0.595 |
| 481.25 | -0.593 |
| 481.42 | -0.59  |
| 481.59 | -0.588 |
| 481.76 | -0.586 |
| 481.93 | -0.585 |
| 482.1  | -0.584 |
| 482.27 | -0.582 |
| 482.45 | -0.578 |
| 482.62 | -0.575 |
| 482.79 | -0.574 |
| 482.96 | -0.577 |
| 483.13 | -0.579 |
| 483.3  | -0.58  |
| 483.47 | -0.58  |
| 483.64 | -0.579 |
| 483.81 | -0.579 |
| 483.98 | -0.579 |
| 484.15 | -0.578 |
| 484.32 | -0.577 |
| 484.49 | -0.574 |
| 484.66 | -0.573 |
| 484.83 | -0.573 |
| 485    | -0.573 |
| 485.17 | -0.573 |
| 485.34 | -0.569 |

|        |        |
|--------|--------|
| 485.51 | -0.567 |
| 485.68 | -0.565 |
| 485.85 | -0.564 |
| 486.02 | -0.563 |
| 486.19 | -0.561 |
| 486.36 | -0.559 |
| 486.54 | -0.559 |
| 486.71 | -0.559 |
| 486.88 | -0.561 |
| 487.05 | -0.561 |
| 487.22 | -0.561 |
| 487.39 | -0.56  |
| 487.56 | -0.559 |
| 487.73 | -0.557 |
| 487.9  | -0.552 |
| 488.07 | -0.548 |
| 488.24 | -0.545 |
| 488.41 | -0.544 |
| 488.58 | -0.544 |
| 488.75 | -0.544 |
| 488.92 | -0.545 |
| 489.09 | -0.545 |
| 489.26 | -0.543 |
| 489.43 | -0.541 |
| 489.6  | -0.538 |
| 489.77 | -0.537 |
| 489.94 | -0.537 |
| 490.11 | -0.538 |
| 490.28 | -0.538 |
| 490.45 | -0.537 |
| 490.62 | -0.536 |
| 490.79 | -0.536 |
| 490.96 | -0.538 |
| 491.13 | -0.54  |
| 491.3  | -0.54  |
| 491.47 | -0.539 |
| 491.64 | -0.536 |
| 491.81 | -0.533 |
| 491.99 | -0.53  |
| 492.16 | -0.528 |
| 492.33 | -0.526 |
| 492.5  | -0.524 |
| 492.67 | -0.522 |
| 492.84 | -0.522 |
| 493.01 | -0.522 |
| 493.18 | -0.523 |
| 493.35 | -0.522 |
| 493.52 | -0.52  |
| 493.69 | -0.518 |
| 493.86 | -0.518 |
| 494.03 | -0.521 |
| 494.2  | -0.524 |
| 494.37 | -0.525 |
| 494.54 | -0.523 |

|        |        |
|--------|--------|
| 494.71 | -0.518 |
| 494.88 | -0.515 |
| 495.05 | -0.514 |
| 495.22 | -0.513 |
| 495.39 | -0.51  |
| 495.56 | -0.507 |
| 495.73 | -0.506 |
| 495.9  | -0.507 |
| 496.07 | -0.509 |
| 496.24 | -0.508 |
| 496.41 | -0.508 |
| 496.58 | -0.509 |
| 496.75 | -0.513 |
| 496.92 | -0.516 |
| 497.09 | -0.517 |
| 497.26 | -0.516 |
| 497.43 | -0.516 |
| 497.6  | -0.516 |
| 497.77 | -0.515 |
| 497.94 | -0.514 |
| 498.11 | -0.512 |
| 498.28 | -0.511 |
| 498.45 | -0.51  |
| 498.62 | -0.51  |
| 498.79 | -0.51  |
| 498.96 | -0.509 |
| 499.13 | -0.51  |
| 499.3  | -0.511 |
| 499.47 | -0.51  |
| 499.64 | -0.509 |
| 499.81 | -0.505 |
| 499.98 | -0.501 |
| 500.15 | -0.498 |
| 500.32 | -0.496 |
| 500.49 | -0.497 |
| 500.66 | -0.498 |
| 500.83 | -0.5   |
| 501    | -0.502 |
| 501.17 | -0.502 |
| 501.34 | -0.502 |
| 501.51 | -0.5   |
| 501.68 | -0.498 |
| 501.85 | -0.497 |
| 502.02 | -0.496 |
| 502.19 | -0.496 |
| 502.36 | -0.494 |
| 502.53 | -0.492 |
| 502.7  | -0.489 |
| 502.87 | -0.488 |
| 503.04 | -0.488 |
| 503.21 | -0.488 |
| 503.38 | -0.489 |
| 503.55 | -0.489 |
| 503.72 | -0.489 |

|        |        |
|--------|--------|
| 503.89 | -0.488 |
| 504.06 | -0.487 |
| 504.23 | -0.486 |
| 504.4  | -0.485 |
| 504.57 | -0.484 |
| 504.74 | -0.483 |
| 504.91 | -0.484 |
| 505.08 | -0.483 |
| 505.25 | -0.48  |
| 505.42 | -0.476 |
| 505.59 | -0.472 |
| 505.76 | -0.471 |
| 505.93 | -0.47  |
| 506.1  | -0.471 |
| 506.27 | -0.472 |
| 506.44 | -0.472 |
| 506.61 | -0.473 |
| 506.78 | -0.473 |
| 506.95 | -0.474 |
| 507.12 | -0.474 |
| 507.29 | -0.475 |
| 507.46 | -0.474 |
| 507.63 | -0.475 |
| 507.8  | -0.473 |
| 507.97 | -0.472 |
| 508.14 | -0.471 |
| 508.31 | -0.472 |
| 508.48 | -0.474 |
| 508.65 | -0.475 |
| 508.82 | -0.476 |
| 508.99 | -0.477 |
| 509.16 | -0.478 |
| 509.33 | -0.477 |
| 509.5  | -0.477 |
| 509.67 | -0.477 |
| 509.84 | -0.478 |
| 510.01 | -0.479 |
| 510.18 | -0.481 |
| 510.35 | -0.483 |
| 510.52 | -0.485 |
| 510.69 | -0.485 |
| 510.86 | -0.483 |
| 511.03 | -0.481 |
| 511.2  | -0.478 |
| 511.37 | -0.476 |
| 511.54 | -0.474 |
| 511.71 | -0.472 |
| 511.87 | -0.472 |
| 512.04 | -0.472 |
| 512.21 | -0.471 |
| 512.38 | -0.471 |
| 512.55 | -0.473 |
| 512.72 | -0.475 |
| 512.89 | -0.476 |

|        |        |
|--------|--------|
| 513.06 | -0.476 |
| 513.23 | -0.476 |
| 513.4  | -0.475 |
| 513.57 | -0.475 |
| 513.74 | -0.476 |
| 513.91 | -0.477 |
| 514.08 | -0.477 |
| 514.25 | -0.476 |
| 514.42 | -0.475 |
| 514.59 | -0.474 |
| 514.76 | -0.472 |
| 514.93 | -0.472 |
| 515.1  | -0.472 |
| 515.27 | -0.475 |
| 515.44 | -0.477 |
| 515.61 | -0.478 |
| 515.78 | -0.478 |
| 515.95 | -0.477 |
| 516.12 | -0.476 |
| 516.29 | -0.477 |
| 516.46 | -0.477 |
| 516.63 | -0.477 |
| 516.8  | -0.476 |
| 516.97 | -0.473 |
| 517.14 | -0.473 |
| 517.31 | -0.473 |
| 517.48 | -0.472 |
| 517.65 | -0.471 |
| 517.82 | -0.47  |
| 517.99 | -0.468 |
| 518.16 | -0.466 |
| 518.33 | -0.464 |
| 518.5  | -0.465 |
| 518.67 | -0.467 |
| 518.84 | -0.467 |
| 519.01 | -0.465 |
| 519.18 | -0.462 |
| 519.35 | -0.46  |
| 519.52 | -0.46  |
| 519.69 | -0.462 |
| 519.86 | -0.464 |
| 520.03 | -0.465 |
| 520.2  | -0.465 |
| 520.37 | -0.466 |
| 520.53 | -0.467 |
| 520.7  | -0.469 |
| 520.87 | -0.47  |
| 521.04 | -0.47  |
| 521.21 | -0.47  |
| 521.38 | -0.47  |
| 521.55 | -0.472 |
| 521.72 | -0.475 |
| 521.89 | -0.477 |
| 522.06 | -0.478 |

|        |        |
|--------|--------|
| 522.23 | -0.478 |
| 522.4  | -0.478 |
| 522.57 | -0.479 |
| 522.74 | -0.479 |
| 522.91 | -0.478 |
| 523.08 | -0.478 |
| 523.25 | -0.479 |
| 523.42 | -0.48  |
| 523.59 | -0.48  |
| 523.76 | -0.478 |
| 523.93 | -0.474 |
| 524.1  | -0.47  |
| 524.27 | -0.468 |
| 524.44 | -0.467 |
| 524.61 | -0.468 |
| 524.78 | -0.469 |
| 524.95 | -0.469 |
| 525.12 | -0.468 |
| 525.29 | -0.468 |
| 525.46 | -0.47  |
| 525.63 | -0.472 |
| 525.8  | -0.474 |
| 525.96 | -0.475 |
| 526.13 | -0.474 |
| 526.3  | -0.473 |
| 526.47 | -0.472 |
| 526.64 | -0.471 |
| 526.81 | -0.47  |
| 526.98 | -0.47  |
| 527.15 | -0.468 |
| 527.32 | -0.467 |
| 527.49 | -0.467 |
| 527.66 | -0.47  |
| 527.83 | -0.473 |
| 528    | -0.476 |
| 528.17 | -0.478 |
| 528.34 | -0.48  |
| 528.51 | -0.481 |
| 528.68 | -0.482 |
| 528.85 | -0.481 |
| 529.02 | -0.479 |
| 529.18 | -0.477 |
| 529.35 | -0.475 |
| 529.52 | -0.475 |
| 529.69 | -0.474 |
| 529.86 | -0.473 |
| 530.03 | -0.473 |
| 530.2  | -0.471 |
| 530.37 | -0.469 |
| 530.54 | -0.466 |
| 530.71 | -0.464 |
| 530.88 | -0.464 |
| 531.05 | -0.464 |
| 531.22 | -0.463 |

|        |        |
|--------|--------|
| 531.39 | -0.463 |
| 531.56 | -0.463 |
| 531.72 | -0.465 |
| 531.89 | -0.466 |
| 532.06 | -0.467 |
| 532.23 | -0.467 |
| 532.4  | -0.468 |
| 532.57 | -0.47  |
| 532.74 | -0.473 |
| 532.91 | -0.475 |
| 533.08 | -0.475 |
| 533.25 | -0.474 |
| 533.42 | -0.473 |
| 533.59 | -0.473 |
| 533.76 | -0.473 |
| 533.93 | -0.472 |
| 534.1  | -0.471 |
| 534.27 | -0.468 |
| 534.44 | -0.466 |
| 534.6  | -0.467 |
| 534.77 | -0.47  |
| 534.94 | -0.473 |
| 535.11 | -0.475 |
| 535.28 | -0.476 |
| 535.45 | -0.477 |
| 535.62 | -0.477 |
| 535.79 | -0.477 |
| 535.96 | -0.475 |
| 536.13 | -0.475 |
| 536.3  | -0.472 |
| 536.47 | -0.47  |
| 536.64 | -0.467 |
| 536.81 | -0.467 |
| 536.98 | -0.467 |
| 537.15 | -0.468 |
| 537.31 | -0.468 |
| 537.48 | -0.467 |
| 537.65 | -0.467 |
| 537.82 | -0.467 |
| 537.99 | -0.467 |
| 538.16 | -0.467 |
| 538.33 | -0.468 |
| 538.5  | -0.469 |
| 538.67 | -0.468 |
| 538.84 | -0.468 |
| 539.01 | -0.47  |
| 539.18 | -0.472 |
| 539.35 | -0.473 |
| 539.52 | -0.472 |
| 539.68 | -0.471 |
| 539.85 | -0.471 |
| 540.02 | -0.47  |
| 540.19 | -0.47  |
| 540.36 | -0.469 |



|        |        |
|--------|--------|
| 540.53 | -0.47  |
| 540.7  | -0.469 |
| 540.87 | -0.469 |
| 541.04 | -0.468 |
| 541.21 | -0.468 |
| 541.38 | -0.467 |
| 541.55 | -0.467 |
| 541.72 | -0.468 |
| 541.89 | -0.468 |
| 542.05 | -0.469 |
| 542.22 | -0.469 |
| 542.39 | -0.47  |
| 542.56 | -0.472 |
| 542.73 | -0.475 |
| 542.9  | -0.479 |
| 543.07 | -0.481 |
| 543.24 | -0.479 |
| 543.41 | -0.475 |
| 543.58 | -0.473 |
| 543.75 | -0.473 |
| 543.92 | -0.475 |
| 544.09 | -0.478 |
| 544.26 | -0.481 |
| 544.42 | -0.482 |
| 544.59 | -0.482 |
| 544.76 | -0.48  |
| 544.93 | -0.481 |
| 545.1  | -0.482 |
| 545.27 | -0.484 |
| 545.44 | -0.483 |
| 545.61 | -0.481 |
| 545.78 | -0.478 |
| 545.95 | -0.477 |
| 546.12 | -0.479 |
| 546.29 | -0.48  |
| 546.46 | -0.482 |
| 546.63 | -0.482 |
| 546.8  | -0.481 |
| 546.96 | -0.482 |
| 547.13 | -0.483 |
| 547.3  | -0.486 |
| 547.47 | -0.488 |
| 547.64 | -0.486 |
| 547.81 | -0.483 |
| 547.98 | -0.482 |
| 548.15 | -0.481 |
| 548.32 | -0.483 |
| 548.49 | -0.485 |
| 548.66 | -0.487 |
| 548.83 | -0.488 |
| 549    | -0.486 |
| 549.16 | -0.484 |
| 549.33 | -0.482 |
| 549.5  | -0.48  |

|        |        |
|--------|--------|
| 549.67 | -0.479 |
| 549.84 | -0.479 |
| 550.01 | -0.48  |
| 550.18 | -0.483 |
| 550.35 | -0.486 |
| 550.52 | -0.488 |
| 550.69 | -0.489 |
| 550.86 | -0.489 |
| 551.03 | -0.488 |
| 551.2  | -0.486 |
| 551.37 | -0.483 |
| 551.54 | -0.481 |
| 551.71 | -0.48  |
| 551.88 | -0.481 |
| 552.05 | -0.481 |
| 552.22 | -0.48  |
| 552.38 | -0.479 |
| 552.55 | -0.478 |
| 552.72 | -0.479 |
| 552.89 | -0.479 |
| 553.06 | -0.48  |
| 553.23 | -0.481 |
| 553.4  | -0.481 |
| 553.57 | -0.481 |
| 553.74 | -0.481 |
| 553.91 | -0.48  |
| 554.08 | -0.481 |
| 554.25 | -0.483 |
| 554.42 | -0.485 |
| 554.59 | -0.486 |
| 554.76 | -0.487 |
| 554.92 | -0.488 |
| 555.09 | -0.489 |
| 555.26 | -0.488 |
| 555.43 | -0.486 |
| 555.6  | -0.484 |
| 555.77 | -0.482 |
| 555.94 | -0.48  |
| 556.11 | -0.479 |
| 556.28 | -0.479 |
| 556.45 | -0.481 |
| 556.62 | -0.483 |
| 556.79 | -0.485 |
| 556.96 | -0.484 |
| 557.13 | -0.482 |
| 557.3  | -0.479 |
| 557.47 | -0.478 |
| 557.64 | -0.479 |
| 557.81 | -0.481 |
| 557.97 | -0.483 |
| 558.14 | -0.485 |
| 558.31 | -0.487 |
| 558.48 | -0.488 |
| 558.65 | -0.487 |

|        |        |
|--------|--------|
| 558.82 | -0.485 |
| 558.99 | -0.482 |
| 559.16 | -0.48  |
| 559.33 | -0.478 |
| 559.5  | -0.479 |
| 559.67 | -0.48  |
| 559.84 | -0.483 |
| 560.01 | -0.485 |
| 560.18 | -0.486 |
| 560.35 | -0.487 |
| 560.52 | -0.488 |
| 560.69 | -0.488 |
| 560.86 | -0.49  |
| 561.03 | -0.49  |
| 561.2  | -0.491 |
| 561.37 | -0.488 |
| 561.54 | -0.486 |
| 561.7  | -0.485 |
| 561.87 | -0.485 |
| 562.04 | -0.485 |
| 562.21 | -0.485 |
| 562.38 | -0.484 |
| 562.55 | -0.484 |
| 562.72 | -0.484 |
| 562.89 | -0.485 |
| 563.06 | -0.487 |
| 563.23 | -0.489 |
| 563.4  | -0.49  |
| 563.57 | -0.489 |
| 563.74 | -0.487 |
| 563.91 | -0.488 |
| 564.08 | -0.492 |
| 564.25 | -0.497 |
| 564.42 | -0.498 |
| 564.59 | -0.497 |
| 564.76 | -0.496 |
| 564.93 | -0.496 |
| 565.1  | -0.497 |
| 565.26 | -0.499 |
| 565.43 | -0.499 |
| 565.6  | -0.499 |
| 565.77 | -0.499 |
| 565.94 | -0.498 |
| 566.11 | -0.496 |
| 566.28 | -0.495 |
| 566.45 | -0.496 |
| 566.62 | -0.499 |
| 566.79 | -0.502 |
| 566.96 | -0.504 |
| 567.13 | -0.504 |
| 567.3  | -0.504 |
| 567.47 | -0.503 |
| 567.64 | -0.503 |
| 567.81 | -0.503 |

|        |        |
|--------|--------|
| 567.98 | -0.504 |
| 568.15 | -0.505 |
| 568.32 | -0.504 |
| 568.49 | -0.502 |
| 568.66 | -0.5   |
| 568.83 | -0.499 |
| 569    | -0.499 |
| 569.17 | -0.5   |
| 569.34 | -0.501 |
| 569.51 | -0.501 |
| 569.68 | -0.501 |
| 569.85 | -0.5   |
| 570.02 | -0.499 |
| 570.19 | -0.5   |
| 570.35 | -0.501 |
| 570.52 | -0.501 |
| 570.69 | -0.502 |
| 570.86 | -0.504 |
| 571.03 | -0.506 |
| 571.2  | -0.507 |
| 571.37 | -0.507 |
| 571.54 | -0.505 |
| 571.71 | -0.504 |
| 571.88 | -0.504 |
| 572.05 | -0.506 |
| 572.22 | -0.507 |
| 572.39 | -0.508 |
| 572.56 | -0.507 |
| 572.73 | -0.505 |
| 572.9  | -0.503 |
| 573.07 | -0.503 |
| 573.24 | -0.504 |
| 573.41 | -0.507 |
| 573.58 | -0.507 |
| 573.75 | -0.505 |
| 573.92 | -0.501 |
| 574.09 | -0.499 |
| 574.26 | -0.499 |
| 574.43 | -0.502 |
| 574.6  | -0.505 |
| 574.77 | -0.508 |
| 574.94 | -0.509 |
| 575.11 | -0.508 |
| 575.28 | -0.507 |
| 575.45 | -0.506 |
| 575.62 | -0.507 |
| 575.79 | -0.508 |
| 575.96 | -0.508 |
| 576.13 | -0.51  |
| 576.3  | -0.511 |
| 576.47 | -0.512 |
| 576.64 | -0.512 |
| 576.81 | -0.511 |
| 576.98 | -0.511 |

|        |        |
|--------|--------|
| 577.15 | -0.512 |
| 577.32 | -0.512 |
| 577.49 | -0.512 |
| 577.66 | -0.512 |
| 577.83 | -0.511 |
| 578    | -0.509 |
| 578.17 | -0.507 |
| 578.34 | -0.507 |
| 578.51 | -0.509 |
| 578.68 | -0.51  |
| 578.85 | -0.511 |
| 579.02 | -0.511 |
| 579.19 | -0.512 |
| 579.36 | -0.511 |
| 579.53 | -0.51  |
| 579.7  | -0.506 |
| 579.87 | -0.504 |
| 580.04 | -0.503 |
| 580.21 | -0.503 |
| 580.38 | -0.503 |
| 580.55 | -0.503 |
| 580.72 | -0.503 |
| 580.89 | -0.504 |
| 581.05 | -0.504 |
| 581.22 | -0.503 |
| 581.39 | -0.502 |
| 581.56 | -0.501 |
| 581.73 | -0.5   |
| 581.9  | -0.5   |
| 582.07 | -0.499 |
| 582.25 | -0.498 |
| 582.42 | -0.499 |
| 582.59 | -0.5   |
| 582.76 | -0.499 |
| 582.93 | -0.496 |
| 583.1  | -0.495 |
| 583.27 | -0.496 |
| 583.44 | -0.498 |
| 583.61 | -0.499 |
| 583.78 | -0.501 |
| 583.95 | -0.502 |
| 584.12 | -0.5   |
| 584.29 | -0.496 |
| 584.46 | -0.492 |
| 584.63 | -0.49  |
| 584.8  | -0.487 |
| 584.97 | -0.486 |
| 585.14 | -0.486 |
| 585.31 | -0.487 |
| 585.48 | -0.489 |
| 585.65 | -0.491 |
| 585.82 | -0.495 |
| 585.99 | -0.498 |
| 586.16 | -0.499 |

|        |        |
|--------|--------|
| 586.33 | -0.498 |
| 586.5  | -0.498 |
| 586.67 | -0.499 |
| 586.84 | -0.5   |
| 587.01 | -0.5   |
| 587.18 | -0.5   |
| 587.35 | -0.499 |
| 587.52 | -0.498 |
| 587.69 | -0.495 |
| 587.86 | -0.493 |
| 588.03 | -0.493 |
| 588.2  | -0.494 |
| 588.37 | -0.495 |
| 588.54 | -0.496 |
| 588.71 | -0.497 |
| 588.88 | -0.497 |
| 589.05 | -0.497 |
| 589.22 | -0.495 |
| 589.39 | -0.494 |
| 589.56 | -0.493 |
| 589.73 | -0.494 |
| 589.9  | -0.494 |
| 590.07 | -0.495 |
| 590.24 | -0.496 |
| 590.41 | -0.496 |
| 590.58 | -0.496 |
| 590.75 | -0.496 |
| 590.92 | -0.497 |
| 591.09 | -0.497 |
| 591.26 | -0.498 |
| 591.43 | -0.499 |
| 591.6  | -0.501 |
| 591.77 | -0.502 |
| 591.94 | -0.501 |
| 592.11 | -0.498 |
| 592.28 | -0.496 |
| 592.45 | -0.496 |
| 592.62 | -0.495 |
| 592.79 | -0.497 |
| 592.96 | -0.499 |
| 593.13 | -0.502 |
| 593.3  | -0.503 |
| 593.47 | -0.503 |
| 593.64 | -0.503 |
| 593.81 | -0.501 |
| 593.98 | -0.5   |
| 594.15 | -0.5   |
| 594.32 | -0.499 |
| 594.49 | -0.496 |
| 594.66 | -0.494 |
| 594.83 | -0.492 |
| 595    | -0.493 |
| 595.17 | -0.492 |
| 595.34 | -0.492 |

|        |        |
|--------|--------|
| 595.51 | -0.492 |
| 595.68 | -0.493 |
| 595.85 | -0.493 |
| 596.02 | -0.494 |
| 596.19 | -0.495 |
| 596.36 | -0.497 |
| 596.53 | -0.498 |
| 596.7  | -0.5   |
| 596.87 | -0.501 |
| 597.04 | -0.503 |
| 597.21 | -0.503 |
| 597.38 | -0.502 |
| 597.55 | -0.501 |
| 597.73 | -0.5   |
| 597.9  | -0.498 |
| 598.07 | -0.498 |
| 598.24 | -0.498 |
| 598.41 | -0.499 |
| 598.58 | -0.5   |
| 598.75 | -0.5   |
| 598.92 | -0.501 |
| 599.09 | -0.502 |
| 599.26 | -0.502 |
| 599.43 | -0.502 |
| 599.6  | -0.501 |
| 599.77 | -0.501 |
| 599.94 | -0.502 |
| 600.11 | -0.503 |
| 600.28 | -0.505 |
| 600.45 | -0.507 |
| 600.62 | -0.508 |
| 600.79 | -0.508 |
| 600.96 | -0.505 |
| 601.13 | -0.501 |
| 601.3  | -0.499 |
| 601.47 | -0.498 |
| 601.64 | -0.498 |
| 601.81 | -0.499 |
| 601.98 | -0.501 |
| 602.15 | -0.502 |
| 602.32 | -0.503 |
| 602.49 | -0.503 |
| 602.66 | -0.503 |
| 602.83 | -0.502 |
| 603    | -0.5   |
| 603.17 | -0.498 |
| 603.34 | -0.498 |
| 603.51 | -0.499 |
| 603.68 | -0.502 |
| 603.85 | -0.503 |
| 604.02 | -0.504 |
| 604.19 | -0.505 |
| 604.36 | -0.506 |
| 604.53 | -0.505 |

|        |        |
|--------|--------|
| 604.71 | -0.504 |
| 604.88 | -0.501 |
| 605.05 | -0.498 |
| 605.22 | -0.497 |
| 605.39 | -0.496 |
| 605.56 | -0.496 |
| 605.73 | -0.495 |
| 605.9  | -0.496 |
| 606.07 | -0.497 |
| 606.24 | -0.498 |
| 606.41 | -0.499 |
| 606.58 | -0.5   |
| 606.75 | -0.5   |
| 606.92 | -0.5   |
| 607.09 | -0.5   |
| 607.26 | -0.499 |
| 607.43 | -0.499 |
| 607.6  | -0.496 |
| 607.77 | -0.494 |
| 607.94 | -0.494 |
| 608.11 | -0.495 |
| 608.28 | -0.496 |
| 608.45 | -0.497 |
| 608.62 | -0.496 |
| 608.79 | -0.492 |
| 608.96 | -0.488 |
| 609.13 | -0.484 |
| 609.3  | -0.482 |
| 609.47 | -0.48  |
| 609.64 | -0.481 |
| 609.81 | -0.484 |
| 609.99 | -0.485 |
| 610.16 | -0.485 |
| 610.33 | -0.484 |
| 610.5  | -0.482 |
| 610.67 | -0.481 |
| 610.84 | -0.48  |
| 611.01 | -0.479 |
| 611.18 | -0.478 |
| 611.35 | -0.476 |
| 611.52 | -0.475 |
| 611.69 | -0.475 |
| 611.86 | -0.477 |
| 612.03 | -0.476 |
| 612.2  | -0.474 |
| 612.37 | -0.471 |
| 612.54 | -0.47  |
| 612.71 | -0.469 |
| 612.88 | -0.468 |
| 613.05 | -0.464 |
| 613.22 | -0.462 |
| 613.39 | -0.461 |
| 613.56 | -0.462 |
| 613.73 | -0.463 |



|        |        |
|--------|--------|
| 613.9  | -0.463 |
| 614.07 | -0.461 |
| 614.24 | -0.46  |
| 614.41 | -0.461 |
| 614.59 | -0.461 |
| 614.76 | -0.46  |
| 614.93 | -0.458 |
| 615.1  | -0.456 |
| 615.27 | -0.456 |
| 615.44 | -0.456 |
| 615.61 | -0.457 |
| 615.78 | -0.456 |
| 615.95 | -0.457 |
| 616.12 | -0.459 |
| 616.29 | -0.463 |
| 616.46 | -0.466 |
| 616.63 | -0.467 |
| 616.8  | -0.466 |
| 616.98 | -0.464 |
| 617.15 | -0.462 |
| 617.32 | -0.461 |
| 617.49 | -0.462 |
| 617.66 | -0.462 |
| 617.83 | -0.463 |
| 618    | -0.463 |
| 618.17 | -0.463 |
| 618.34 | -0.462 |
| 618.51 | -0.461 |
| 618.68 | -0.46  |
| 618.85 | -0.46  |
| 619.02 | -0.46  |
| 619.2  | -0.46  |
| 619.37 | -0.46  |
| 619.54 | -0.461 |
| 619.71 | -0.462 |
| 619.88 | -0.461 |
| 620.05 | -0.46  |
| 620.22 | -0.459 |
| 620.39 | -0.46  |
| 620.56 | -0.461 |
| 620.73 | -0.461 |
| 620.9  | -0.461 |
| 621.07 | -0.459 |
| 621.24 | -0.457 |
| 621.41 | -0.456 |
| 621.58 | -0.457 |
| 621.75 | -0.459 |
| 621.92 | -0.46  |
| 622.09 | -0.461 |
| 622.26 | -0.459 |
| 622.43 | -0.457 |
| 622.6  | -0.457 |
| 622.78 | -0.456 |
| 622.95 | -0.454 |

|         |         |
|---------|---------|
| 623. 11 | -0. 45  |
| 623. 28 | -0. 449 |
| 623. 45 | -0. 45  |
| 623. 62 | -0. 452 |
| 623. 79 | -0. 456 |
| 623. 96 | -0. 456 |
| 624. 13 | -0. 457 |
| 624. 3  | -0. 456 |
| 624. 47 | -0. 455 |
| 624. 64 | -0. 454 |
| 624. 81 | -0. 451 |
| 624. 98 | -0. 447 |
| 625. 15 | -0. 441 |
| 625. 32 | -0. 438 |
| 625. 49 | -0. 437 |
| 625. 66 | -0. 437 |
| 625. 83 | -0. 438 |
| 626     | -0. 439 |
| 626. 17 | -0. 44  |
| 626. 34 | -0. 44  |
| 626. 51 | -0. 441 |
| 626. 68 | -0. 443 |
| 626. 85 | -0. 444 |
| 627. 02 | -0. 445 |
| 627. 19 | -0. 445 |
| 627. 36 | -0. 443 |
| 627. 53 | -0. 441 |
| 627. 7  | -0. 439 |
| 627. 87 | -0. 437 |
| 628. 04 | -0. 434 |
| 628. 21 | -0. 431 |
| 628. 38 | -0. 43  |
| 628. 55 | -0. 43  |
| 628. 72 | -0. 432 |
| 628. 89 | -0. 432 |
| 629. 05 | -0. 432 |
| 629. 22 | -0. 43  |
| 629. 39 | -0. 43  |
| 629. 56 | -0. 43  |
| 629. 73 | -0. 43  |
| 629. 9  | -0. 431 |
| 630. 07 | -0. 432 |
| 630. 24 | -0. 433 |
| 630. 41 | -0. 432 |
| 630. 58 | -0. 431 |
| 630. 75 | -0. 431 |
| 630. 92 | -0. 431 |
| 631. 09 | -0. 431 |
| 631. 26 | -0. 43  |
| 631. 43 | -0. 43  |
| 631. 6  | -0. 43  |
| 631. 76 | -0. 432 |
| 631. 93 | -0. 434 |
| 632. 1  | -0. 433 |

|        |        |
|--------|--------|
| 632.27 | -0.431 |
| 632.44 | -0.427 |
| 632.61 | -0.426 |
| 632.78 | -0.423 |
| 632.95 | -0.423 |
| 633.12 | -0.423 |
| 633.29 | -0.423 |
| 633.46 | -0.425 |
| 633.63 | -0.427 |
| 633.8  | -0.43  |
| 633.97 | -0.431 |
| 634.14 | -0.431 |
| 634.31 | -0.431 |
| 634.48 | -0.429 |
| 634.65 | -0.427 |
| 634.81 | -0.425 |
| 634.98 | -0.423 |
| 635.15 | -0.422 |
| 635.32 | -0.421 |
| 635.49 | -0.42  |
| 635.66 | -0.42  |
| 635.83 | -0.421 |
| 636    | -0.421 |
| 636.17 | -0.422 |
| 636.34 | -0.422 |
| 636.51 | -0.422 |
| 636.68 | -0.423 |
| 636.85 | -0.424 |
| 637.02 | -0.425 |
| 637.19 | -0.425 |
| 637.36 | -0.423 |
| 637.53 | -0.422 |
| 637.7  | -0.422 |
| 637.87 | -0.422 |
| 638.04 | -0.421 |
| 638.2  | -0.421 |
| 638.37 | -0.42  |
| 638.54 | -0.42  |
| 638.71 | -0.419 |
| 638.88 | -0.418 |
| 639.05 | -0.418 |
| 639.22 | -0.417 |
| 639.39 | -0.417 |
| 639.56 | -0.418 |
| 639.73 | -0.418 |
| 639.9  | -0.419 |
| 640.07 | -0.419 |
| 640.24 | -0.419 |
| 640.41 | -0.418 |
| 640.58 | -0.417 |
| 640.75 | -0.415 |
| 640.92 | -0.413 |
| 641.09 | -0.412 |
| 641.26 | -0.411 |

|        |        |
|--------|--------|
| 641.43 | -0.409 |
| 641.6  | -0.408 |
| 641.77 | -0.406 |
| 641.94 | -0.404 |
| 642.11 | -0.402 |
| 642.28 | -0.4   |
| 642.45 | -0.398 |
| 642.62 | -0.396 |
| 642.78 | -0.395 |
| 642.95 | -0.393 |
| 643.12 | -0.392 |
| 643.29 | -0.393 |
| 643.46 | -0.393 |
| 643.63 | -0.393 |
| 643.8  | -0.393 |
| 643.97 | -0.394 |
| 644.14 | -0.393 |
| 644.31 | -0.392 |
| 644.48 | -0.39  |
| 644.65 | -0.39  |
| 644.82 | -0.391 |
| 644.99 | -0.393 |
| 645.16 | -0.394 |
| 645.33 | -0.393 |
| 645.5  | -0.391 |
| 645.67 | -0.389 |
| 645.84 | -0.388 |
| 646.01 | -0.388 |
| 646.18 | -0.388 |
| 646.35 | -0.387 |
| 646.52 | -0.385 |
| 646.69 | -0.385 |
| 646.86 | -0.385 |
| 647.03 | -0.384 |
| 647.2  | -0.383 |
| 647.37 | -0.381 |
| 647.54 | -0.38  |
| 647.7  | -0.38  |
| 647.87 | -0.38  |
| 648.04 | -0.378 |
| 648.21 | -0.376 |
| 648.38 | -0.374 |
| 648.55 | -0.372 |
| 648.72 | -0.37  |
| 648.89 | -0.369 |
| 649.06 | -0.368 |
| 649.23 | -0.368 |
| 649.4  | -0.368 |
| 649.57 | -0.369 |
| 649.74 | -0.369 |
| 649.91 | -0.369 |
| 650.08 | -0.37  |
| 650.25 | -0.37  |
| 650.42 | -0.371 |

|        |        |
|--------|--------|
| 650.59 | -0.372 |
| 650.76 | -0.372 |
| 650.93 | -0.373 |
| 651.1  | -0.373 |
| 651.27 | -0.373 |
| 651.44 | -0.372 |
| 651.61 | -0.371 |
| 651.78 | -0.369 |
| 651.95 | -0.368 |
| 652.12 | -0.367 |
| 652.29 | -0.367 |
| 652.46 | -0.367 |
| 652.63 | -0.366 |
| 652.8  | -0.366 |
| 652.97 | -0.365 |
| 653.14 | -0.363 |
| 653.31 | -0.361 |
| 653.48 | -0.358 |
| 653.65 | -0.355 |
| 653.82 | -0.354 |
| 653.99 | -0.355 |
| 654.16 | -0.357 |
| 654.33 | -0.359 |
| 654.5  | -0.36  |
| 654.67 | -0.359 |
| 654.84 | -0.358 |
| 655.01 | -0.356 |
| 655.18 | -0.355 |
| 655.34 | -0.354 |
| 655.51 | -0.354 |
| 655.68 | -0.354 |
| 655.85 | -0.354 |
| 656.02 | -0.355 |
| 656.19 | -0.354 |
| 656.36 | -0.354 |
| 656.53 | -0.354 |
| 656.7  | -0.355 |
| 656.87 | -0.356 |
| 657.04 | -0.357 |
| 657.21 | -0.357 |
| 657.38 | -0.358 |
| 657.55 | -0.357 |
| 657.72 | -0.356 |
| 657.89 | -0.353 |
| 658.06 | -0.351 |
| 658.23 | -0.349 |
| 658.4  | -0.349 |
| 658.57 | -0.349 |
| 658.74 | -0.349 |
| 658.91 | -0.349 |
| 659.08 | -0.348 |
| 659.25 | -0.347 |
| 659.42 | -0.347 |
| 659.59 | -0.347 |

|        |        |
|--------|--------|
| 659.76 | -0.348 |
| 659.93 | -0.349 |
| 660.1  | -0.351 |
| 660.27 | -0.353 |
| 660.44 | -0.354 |
| 660.61 | -0.355 |
| 660.78 | -0.354 |
| 660.95 | -0.354 |
| 661.12 | -0.353 |
| 661.29 | -0.353 |
| 661.46 | -0.353 |
| 661.63 | -0.352 |
| 661.8  | -0.353 |
| 661.97 | -0.354 |
| 662.14 | -0.355 |
| 662.31 | -0.355 |
| 662.48 | -0.354 |
| 662.65 | -0.353 |
| 662.82 | -0.35  |
| 662.99 | -0.348 |
| 663.16 | -0.345 |
| 663.33 | -0.344 |
| 663.5  | -0.344 |
| 663.67 | -0.345 |
| 663.84 | -0.344 |
| 664.01 | -0.344 |
| 664.18 | -0.342 |
| 664.35 | -0.34  |
| 664.52 | -0.337 |
| 664.69 | -0.336 |
| 664.86 | -0.335 |
| 665.03 | -0.335 |
| 665.2  | -0.336 |
| 665.37 | -0.338 |
| 665.54 | -0.339 |
| 665.71 | -0.34  |
| 665.88 | -0.34  |
| 666.05 | -0.34  |
| 666.22 | -0.339 |
| 666.39 | -0.339 |
| 666.56 | -0.34  |
| 666.73 | -0.343 |
| 666.9  | -0.344 |
| 667.07 | -0.343 |
| 667.24 | -0.342 |
| 667.41 | -0.342 |
| 667.58 | -0.34  |
| 667.76 | -0.339 |
| 667.92 | -0.34  |
| 668.1  | -0.34  |
| 668.27 | -0.34  |
| 668.44 | -0.339 |
| 668.61 | -0.337 |
| 668.78 | -0.335 |

|        |        |
|--------|--------|
| 668.95 | -0.333 |
| 669.12 | -0.331 |
| 669.29 | -0.329 |
| 669.46 | -0.327 |
| 669.63 | -0.325 |
| 669.8  | -0.323 |
| 669.97 | -0.321 |
| 670.14 | -0.32  |
| 670.31 | -0.32  |
| 670.48 | -0.32  |
| 670.65 | -0.32  |
| 670.82 | -0.32  |
| 670.99 | -0.32  |
| 671.16 | -0.321 |
| 671.33 | -0.322 |
| 671.5  | -0.323 |
| 671.67 | -0.324 |
| 671.84 | -0.326 |
| 672.01 | -0.326 |
| 672.18 | -0.326 |
| 672.35 | -0.326 |
| 672.52 | -0.326 |
| 672.69 | -0.328 |
| 672.86 | -0.328 |
| 673.03 | -0.328 |
| 673.2  | -0.329 |
| 673.38 | -0.329 |
| 673.55 | -0.33  |
| 673.72 | -0.329 |
| 673.89 | -0.328 |
| 674.06 | -0.325 |
| 674.23 | -0.322 |
| 674.4  | -0.32  |
| 674.57 | -0.318 |
| 674.74 | -0.316 |
| 674.91 | -0.315 |
| 675.08 | -0.315 |
| 675.25 | -0.315 |
| 675.42 | -0.315 |
| 675.59 | -0.314 |
| 675.76 | -0.314 |
| 675.93 | -0.315 |
| 676.1  | -0.314 |
| 676.27 | -0.314 |
| 676.44 | -0.313 |
| 676.61 | -0.313 |
| 676.78 | -0.314 |
| 676.95 | -0.314 |
| 677.12 | -0.315 |
| 677.29 | -0.316 |
| 677.46 | -0.316 |
| 677.64 | -0.316 |
| 677.81 | -0.316 |
| 677.98 | -0.316 |

|        |        |
|--------|--------|
| 678.15 | -0.316 |
| 678.32 | -0.315 |
| 678.49 | -0.316 |
| 678.66 | -0.317 |
| 678.83 | -0.318 |
| 679    | -0.318 |
| 679.17 | -0.319 |
| 679.34 | -0.32  |
| 679.51 | -0.32  |
| 679.68 | -0.319 |
| 679.85 | -0.318 |
| 680.02 | -0.316 |
| 680.19 | -0.315 |
| 680.36 | -0.313 |
| 680.53 | -0.313 |
| 680.71 | -0.312 |
| 680.88 | -0.311 |
| 681.05 | -0.311 |
| 681.22 | -0.311 |
| 681.39 | -0.31  |
| 681.56 | -0.308 |
| 681.73 | -0.307 |
| 681.9  | -0.307 |
| 682.07 | -0.306 |
| 682.24 | -0.304 |
| 682.41 | -0.302 |
| 682.58 | -0.3   |
| 682.75 | -0.298 |
| 682.92 | -0.297 |
| 683.09 | -0.296 |
| 683.26 | -0.295 |
| 683.44 | -0.296 |
| 683.61 | -0.297 |
| 683.78 | -0.298 |
| 683.95 | -0.297 |
| 684.12 | -0.297 |
| 684.29 | -0.296 |
| 684.46 | -0.295 |
| 684.63 | -0.293 |
| 684.8  | -0.291 |
| 684.97 | -0.292 |
| 685.14 | -0.293 |
| 685.31 | -0.293 |
| 685.48 | -0.292 |
| 685.65 | -0.29  |
| 685.82 | -0.289 |
| 685.99 | -0.287 |
| 686.16 | -0.287 |
| 686.34 | -0.286 |
| 686.51 | -0.286 |
| 686.68 | -0.287 |
| 686.85 | -0.288 |
| 687.02 | -0.289 |
| 687.19 | -0.288 |



|        |        |
|--------|--------|
| 687.36 | -0.288 |
| 687.53 | -0.287 |
| 687.7  | -0.287 |
| 687.87 | -0.287 |
| 688.04 | -0.287 |
| 688.21 | -0.287 |
| 688.38 | -0.286 |
| 688.55 | -0.285 |
| 688.73 | -0.283 |
| 688.9  | -0.282 |
| 689.07 | -0.282 |
| 689.24 | -0.282 |
| 689.41 | -0.281 |
| 689.58 | -0.281 |
| 689.75 | -0.28  |
| 689.92 | -0.278 |
| 690.09 | -0.276 |
| 690.26 | -0.276 |
| 690.43 | -0.276 |
| 690.6  | -0.275 |
| 690.78 | -0.275 |
| 690.95 | -0.274 |
| 691.12 | -0.274 |
| 691.29 | -0.274 |
| 691.46 | -0.275 |
| 691.63 | -0.276 |
| 691.8  | -0.278 |
| 691.97 | -0.28  |
| 692.14 | -0.28  |
| 692.31 | -0.28  |
| 692.48 | -0.281 |
| 692.65 | -0.282 |
| 692.83 | -0.284 |
| 693    | -0.285 |
| 693.17 | -0.288 |
| 693.34 | -0.289 |
| 693.51 | -0.289 |
| 693.68 | -0.286 |
| 693.85 | -0.284 |
| 694.02 | -0.281 |
| 694.19 | -0.279 |
| 694.36 | -0.276 |
| 694.53 | -0.282 |
| 694.7  | -0.282 |
| 694.88 | -0.283 |
| 695.05 | -0.282 |
| 695.22 | -0.281 |
| 695.39 | -0.281 |
| 695.56 | -0.279 |
| 695.73 | -0.277 |
| 695.9  | -0.277 |
| 696.07 | -0.279 |
| 696.24 | -0.28  |
| 696.42 | -0.282 |

|        |        |
|--------|--------|
| 696.59 | -0.285 |
| 696.76 | -0.29  |
| 696.93 | -0.296 |
| 697.1  | -0.301 |
| 697.27 | -0.309 |
| 697.44 | -0.312 |
| 697.61 | -0.315 |
| 697.78 | -0.319 |
| 697.95 | -0.315 |
| 698.12 | -0.298 |
| 698.29 | -0.285 |
| 698.47 | -0.304 |
| 698.64 | -0.35  |
| 698.81 | -0.639 |
