# Supplementary material for: Enhanced Thermal Insulation and Flame-Retardant Properties of Polyvinyl Alcohol-Based Aerogels Composited with Ammonium Polyphosphate and Chitosan
Source: Hindawi journal article supplement (doi:10.1155/2021/5555916), 2021-05-28
Supplement: f1 [file 5555916.f1.zip › The data of XRD for Figure 4.pdf]

|          | APP       | CS        | APP-CS    |
|----------|-----------|-----------|-----------|
| Angle    | Intensity | Intensity | Intensity |
| 5. 01313 | 14796     | 30235     | 47000     |
| 5. 03939 | 14694     | 30115     | 46900     |
| 5. 06565 | 14738     | 30180     | 46913     |
| 5. 09191 | 14744     | 30225     | 46947     |
| 5. 11817 | 14640     | 30232     | 46863     |
| 5. 14443 | 14774     | 30158     | 46873     |
| 5. 17069 | 14702     | 30168     | 46926     |
| 5. 19695 | 14749     | 30194     | 46902     |
| 5. 22321 | 14798     | 30196     | 46935     |
| 5. 24948 | 14790     | 30207     | 46854     |
| 5. 27574 | 14760     | 30214     | 46890     |
| 5. 302   | 14760     | 30224     | 46897     |
| 5. 32826 | 14797     | 30134     | 47021     |
| 5. 35452 | 14719     | 30147     | 47099     |
| 5. 38078 | 14735     | 30192     | 47019     |
| 5. 40704 | 14800     | 30213     | 46883     |
| 5. 4333  | 14821     | 30215     | 46955     |
| 5. 45956 | 14746     | 30152     | 47011     |
| 5. 48582 | 14741     | 30259     | 46915     |
| 5. 51208 | 14704     | 30338     | 46970     |
| 5. 53834 | 14691     | 30262     | 47011     |
| 5. 5646  | 14773     | 30242     | 46948     |
| 5. 59086 | 14830     | 30216     | 47038     |
| 5. 61712 | 14771     | 30217     | 47063     |
| 5. 64338 | 14872     | 30246     | 47013     |
| 5. 66964 | 14789     | 30255     | 47013     |
| 5. 6959  | 14904     | 30250     | 47071     |
| 5. 72217 | 14835     | 30231     | 47084     |
| 5. 74843 | 14865     | 30328     | 47021     |
| 5. 77469 | 14805     | 30265     | 47017     |
| 5. 80095 | 14962     | 30388     | 47070     |
| 5. 82721 | 14845     | 30365     | 47161     |
| 5. 85347 | 14909     | 30344     | 47092     |
| 5. 87973 | 14948     | 30313     | 47001     |
| 5. 90599 | 14852     | 30276     | 47000     |
| 5. 93225 | 14858     | 30292     | 46983     |
| 5. 95851 | 14792     | 30387     | 47069     |
| 5. 98477 | 14829     | 30321     | 47218     |
| 6. 01103 | 14867     | 30422     | 47035     |
| 6. 03729 | 14828     | 30242     | 47170     |
| 6. 06355 | 14909     | 30348     | 47232     |
| 6. 08981 | 14839     | 30455     | 47077     |
| 6. 11607 | 14841     | 30331     | 46994     |
| 6. 14233 | 14943     | 30349     | 47054     |
| 6. 1686  | 14925     | 30414     | 47213     |
| 6. 19486 | 14927     | 30309     | 47127     |
| 6. 22112 | 14964     | 30425     | 47012     |
| 6. 24738 | 14849     | 30281     | 47143     |
| 6. 27364 | 14881     | 30431     | 47187     |
| 6. 2999  | 14863     | 30338     | 47106     |
| 6. 32616 | 14871     | 30362     | 47077     |
| 6. 35242 | 14865     | 30371     | 47184     |

|          |       |       |       |
|----------|-------|-------|-------|
| 6. 37868 | 14958 | 30417 | 47100 |
| 6. 40494 | 14950 | 30400 | 47197 |
| 6. 4312  | 14836 | 30384 | 47189 |
| 6. 45746 | 14859 | 30416 | 47225 |
| 6. 48372 | 14965 | 30343 | 47069 |
| 6. 50998 | 14985 | 30329 | 47218 |
| 6. 53624 | 14998 | 30421 | 47108 |
| 6. 5625  | 14925 | 30496 | 47154 |
| 6. 58876 | 14825 | 30542 | 47126 |
| 6. 61502 | 14842 | 30362 | 47124 |
| 6. 64129 | 14935 | 30415 | 47158 |
| 6. 66755 | 14930 | 30453 | 47104 |
| 6. 69381 | 14890 | 30484 | 47177 |
| 6. 72007 | 14873 | 30367 | 47227 |
| 6. 74633 | 14920 | 30487 | 47215 |
| 6. 77259 | 14941 | 30571 | 47242 |
| 6. 79885 | 14924 | 30538 | 47204 |
| 6. 82511 | 14914 | 30507 | 47242 |
| 6. 85137 | 15018 | 30428 | 47269 |
| 6. 87763 | 14959 | 30451 | 47291 |
| 6. 90389 | 14907 | 30505 | 47128 |
| 6. 93015 | 14981 | 30595 | 47214 |
| 6. 95641 | 14879 | 30477 | 47183 |
| 6. 98267 | 14909 | 30539 | 47270 |
| 7. 00893 | 14903 | 30502 | 47140 |
| 7. 03519 | 14949 | 30524 | 47197 |
| 7. 06145 | 14951 | 30456 | 47124 |
| 7. 08771 | 14896 | 30550 | 47198 |
| 7. 11398 | 14935 | 30520 | 47034 |
| 7. 14024 | 14904 | 30411 | 47277 |
| 7. 1665  | 14988 | 30502 | 47253 |
| 7. 19276 | 14968 | 30444 | 47170 |
| 7. 21902 | 14947 | 30411 | 47214 |
| 7. 24528 | 15000 | 30556 | 47248 |
| 7. 27154 | 14881 | 30530 | 47119 |
| 7. 2978  | 14821 | 30571 | 47154 |
| 7. 32406 | 14843 | 30551 | 47226 |
| 7. 35032 | 14910 | 30531 | 47303 |
| 7. 37658 | 14953 | 30509 | 47141 |
| 7. 40284 | 14968 | 30546 | 47188 |
| 7. 4291  | 14857 | 30573 | 47166 |
| 7. 45536 | 14899 | 30561 | 47229 |
| 7. 48162 | 14993 | 30473 | 47162 |
| 7. 50788 | 15016 | 30560 | 47302 |
| 7. 53414 | 14988 | 30569 | 47168 |
| 7. 56041 | 14897 | 30554 | 47283 |
| 7. 58667 | 14834 | 30559 | 47254 |
| 7. 61293 | 14954 | 30610 | 47163 |
| 7. 63919 | 14885 | 30575 | 47226 |
| 7. 66545 | 14959 | 30569 | 47139 |
| 7. 69171 | 14894 | 30522 | 47172 |
| 7. 71797 | 15046 | 30560 | 47261 |
| 7. 74423 | 15026 | 30620 | 47337 |
| 7. 77049 | 14960 | 30608 | 47183 |

|          |       |       |       |
|----------|-------|-------|-------|
| 7. 79675 | 15007 | 30655 | 47195 |
| 7. 82301 | 15034 | 30553 | 47293 |
| 7. 84927 | 15019 | 30670 | 47110 |
| 7. 87553 | 14998 | 30677 | 47235 |
| 7. 90179 | 14881 | 30552 | 47112 |
| 7. 92805 | 14963 | 30562 | 47095 |
| 7. 95431 | 14973 | 30645 | 47222 |
| 7. 98057 | 14979 | 30577 | 47161 |
| 8. 00683 | 14879 | 30654 | 47235 |
| 8. 0331  | 14938 | 30763 | 47172 |
| 8. 05936 | 14912 | 30651 | 47127 |
| 8. 08562 | 14959 | 30670 | 47194 |
| 8. 11188 | 15000 | 30604 | 47140 |
| 8. 13814 | 14982 | 30687 | 47189 |
| 8. 1644  | 14834 | 30750 | 47086 |
| 8. 19066 | 14853 | 30680 | 47229 |
| 8. 21692 | 14870 | 30617 | 47058 |
| 8. 24318 | 14955 | 30560 | 47115 |
| 8. 26944 | 14981 | 30598 | 47143 |
| 8. 2957  | 15031 | 30639 | 47171 |
| 8. 32196 | 14945 | 30652 | 47118 |
| 8. 34822 | 14862 | 30618 | 47131 |
| 8. 37448 | 14875 | 30638 | 47190 |
| 8. 40074 | 14937 | 30677 | 47111 |
| 8. 427   | 14884 | 30671 | 47233 |
| 8. 45326 | 14883 | 30771 | 47168 |
| 8. 47952 | 14930 | 30683 | 47020 |
| 8. 50579 | 14901 | 30701 | 47137 |
| 8. 53205 | 14820 | 30758 | 47085 |
| 8. 55831 | 14713 | 30802 | 47061 |
| 8. 58457 | 14907 | 30686 | 47274 |
| 8. 61083 | 14860 | 30764 | 47114 |
| 8. 63709 | 14856 | 30739 | 47065 |
| 8. 66335 | 14901 | 30694 | 47050 |
| 8. 68961 | 14875 | 30580 | 47102 |
| 8. 71587 | 14897 | 30719 | 47111 |
| 8. 74213 | 14907 | 30813 | 46990 |
| 8. 76839 | 14782 | 30689 | 46995 |
| 8. 79465 | 14807 | 30784 | 47043 |
| 8. 82091 | 14823 | 30824 | 47110 |
| 8. 84717 | 14846 | 30786 | 47025 |
| 8. 87343 | 14800 | 30667 | 47082 |
| 8. 89969 | 14778 | 30694 | 47023 |
| 8. 92595 | 14795 | 30719 | 46977 |
| 8. 95222 | 14806 | 30746 | 47028 |
| 8. 97848 | 14823 | 30804 | 47083 |
| 9. 00474 | 14781 | 30784 | 47090 |
| 9. 031   | 14720 | 30734 | 47146 |
| 9. 05726 | 14807 | 30747 | 46992 |
| 9. 08352 | 14853 | 30844 | 47086 |
| 9. 10978 | 14708 | 30808 | 47012 |
| 9. 13604 | 14762 | 30827 | 47009 |
| 9. 1623  | 14697 | 30869 | 46969 |
| 9. 18856 | 14756 | 30938 | 46983 |

|           |       |       |       |
|-----------|-------|-------|-------|
| 9. 21482  | 14708 | 30829 | 47073 |
| 9. 24108  | 14664 | 30769 | 47005 |
| 9. 26734  | 14635 | 30796 | 46921 |
| 9. 2936   | 14695 | 30924 | 47037 |
| 9. 31986  | 14659 | 30868 | 47057 |
| 9. 34612  | 14754 | 30915 | 47019 |
| 9. 37238  | 14652 | 30999 | 47000 |
| 9. 39864  | 14702 | 30876 | 46874 |
| 9. 42491  | 14786 | 30880 | 46948 |
| 9. 45117  | 14686 | 30817 | 46745 |
| 9. 47743  | 14781 | 30938 | 46940 |
| 9. 50369  | 14763 | 30780 | 46845 |
| 9. 52995  | 14677 | 30907 | 46843 |
| 9. 55621  | 14658 | 30953 | 46911 |
| 9. 58247  | 14674 | 30930 | 46942 |
| 9. 60873  | 14642 | 30969 | 46824 |
| 9. 63499  | 14711 | 30902 | 46860 |
| 9. 66125  | 14597 | 30844 | 46769 |
| 9. 68751  | 14631 | 30929 | 46905 |
| 9. 71377  | 14612 | 31014 | 46928 |
| 9. 74003  | 14666 | 30975 | 46793 |
| 9. 76629  | 14568 | 30956 | 46870 |
| 9. 79255  | 14725 | 30940 | 46809 |
| 9. 81881  | 14627 | 30955 | 46872 |
| 9. 84507  | 14613 | 30840 | 46911 |
| 9. 87133  | 14653 | 30936 | 46851 |
| 9. 8976   | 14624 | 30971 | 46897 |
| 9. 92386  | 14672 | 30956 | 46760 |
| 9. 95012  | 14590 | 31060 | 46819 |
| 9. 97638  | 14605 | 31009 | 46681 |
| 10. 00264 | 14563 | 31017 | 46861 |
| 10. 0289  | 14597 | 31094 | 46742 |
| 10. 05516 | 14562 | 31029 | 46787 |
| 10. 08142 | 14551 | 30988 | 46741 |
| 10. 10768 | 14638 | 31029 | 46906 |
| 10. 13394 | 14533 | 30974 | 46796 |
| 10. 1602  | 14630 | 31025 | 46781 |
| 10. 18646 | 14626 | 30937 | 46756 |
| 10. 21272 | 14589 | 31061 | 46732 |
| 10. 23898 | 14583 | 31098 | 46710 |
| 10. 26524 | 14534 | 31081 | 46652 |
| 10. 2915  | 14517 | 31010 | 46785 |
| 10. 31776 | 14579 | 31222 | 46852 |
| 10. 34403 | 14535 | 31022 | 46836 |
| 10. 37029 | 14647 | 31176 | 46763 |
| 10. 39655 | 14565 | 31122 | 46747 |
| 10. 42281 | 14477 | 31062 | 46785 |
| 10. 44907 | 14446 | 31041 | 46783 |
| 10. 47533 | 14579 | 31110 | 46733 |
| 10. 50159 | 14550 | 31130 | 46751 |
| 10. 52785 | 14516 | 31079 | 46738 |
| 10. 55411 | 14509 | 31142 | 46687 |
| 10. 58037 | 14527 | 31030 | 46805 |
| 10. 60663 | 14599 | 31059 | 46689 |

|           |       |       |       |
|-----------|-------|-------|-------|
| 10. 63289 | 14548 | 31112 | 46675 |
| 10. 65915 | 14499 | 31130 | 46636 |
| 10. 68541 | 14471 | 31234 | 46739 |
| 10. 71167 | 14541 | 31189 | 46726 |
| 10. 73793 | 14566 | 31221 | 46565 |
| 10. 76419 | 14532 | 31201 | 46599 |
| 10. 79045 | 14546 | 31024 | 46786 |
| 10. 81672 | 14590 | 31174 | 46679 |
| 10. 84298 | 14526 | 31098 | 46635 |
| 10. 86924 | 14591 | 31149 | 46636 |
| 10. 8955  | 14529 | 31167 | 46581 |
| 10. 92176 | 14517 | 31092 | 46668 |
| 10. 94802 | 14537 | 31091 | 46585 |
| 10. 97428 | 14572 | 31097 | 46500 |
| 11. 00054 | 14510 | 31092 | 46675 |
| 11. 0268  | 14516 | 31069 | 46483 |
| 11. 05306 | 14538 | 31112 | 46617 |
| 11. 07932 | 14469 | 31180 | 46618 |
| 11. 10558 | 14526 | 31136 | 46686 |
| 11. 13184 | 14505 | 31158 | 46563 |
| 11. 1581  | 14551 | 31197 | 46585 |
| 11. 18436 | 14539 | 31183 | 46598 |
| 11. 21062 | 14497 | 31184 | 46616 |
| 11. 23688 | 14421 | 31146 | 46587 |
| 11. 26314 | 14385 | 31085 | 46522 |
| 11. 28941 | 14489 | 31103 | 46583 |
| 11. 31567 | 14403 | 31147 | 46560 |
| 11. 34193 | 14499 | 31153 | 46599 |
| 11. 36819 | 14339 | 31151 | 46564 |
| 11. 39445 | 14420 | 31108 | 46533 |
| 11. 42071 | 14439 | 31212 | 46441 |
| 11. 44697 | 14439 | 31198 | 46623 |
| 11. 47323 | 14495 | 31178 | 46442 |
| 11. 49949 | 14347 | 31204 | 46604 |
| 11. 52575 | 14365 | 31245 | 46550 |
| 11. 55201 | 14380 | 31206 | 46577 |
| 11. 57827 | 14441 | 31076 | 46380 |
| 11. 60453 | 14422 | 31199 | 46378 |
| 11. 63079 | 14432 | 31087 | 46526 |
| 11. 65705 | 14330 | 31079 | 46566 |
| 11. 68331 | 14442 | 31124 | 46566 |
| 11. 70957 | 14376 | 31215 | 46450 |
| 11. 73584 | 14416 | 31134 | 46467 |
| 11. 7621  | 14455 | 30940 | 46591 |
| 11. 78836 | 14405 | 31093 | 46452 |
| 11. 81462 | 14408 | 31219 | 46492 |
| 11. 84088 | 14429 | 31020 | 46485 |
| 11. 86714 | 14456 | 31045 | 46449 |
| 11. 8934  | 14482 | 30995 | 46480 |
| 11. 91966 | 14370 | 31079 | 46510 |
| 11. 94592 | 14354 | 31037 | 46458 |
| 11. 97218 | 14363 | 31096 | 46465 |
| 11. 99844 | 14386 | 31166 | 46463 |
| 12. 0247  | 14373 | 31040 | 46433 |

|           |       |       |       |
|-----------|-------|-------|-------|
| 12. 05096 | 14401 | 31245 | 46478 |
| 12. 07722 | 14478 | 31013 | 46445 |
| 12. 10348 | 14434 | 31047 | 46457 |
| 12. 12974 | 14334 | 31236 | 46428 |
| 12. 156   | 14394 | 30977 | 46423 |
| 12. 18226 | 14376 | 31098 | 46428 |
| 12. 20853 | 14426 | 31004 | 46462 |
| 12. 23479 | 14436 | 31067 | 46489 |
| 12. 26105 | 14358 | 31165 | 46426 |
| 12. 28731 | 14413 | 31118 | 46456 |
| 12. 31357 | 14389 | 31033 | 46324 |
| 12. 33983 | 14450 | 31078 | 46336 |
| 12. 36609 | 14346 | 31045 | 46481 |
| 12. 39235 | 14355 | 31025 | 46312 |
| 12. 41861 | 14437 | 31074 | 46333 |
| 12. 44487 | 14338 | 30953 | 46455 |
| 12. 47113 | 14408 | 31092 | 46339 |
| 12. 49739 | 14402 | 30996 | 46402 |
| 12. 52365 | 14377 | 31026 | 46401 |
| 12. 54991 | 14316 | 30967 | 46412 |
| 12. 57617 | 14405 | 30944 | 46402 |
| 12. 60243 | 14412 | 31055 | 46357 |
| 12. 62869 | 14345 | 31078 | 46436 |
| 12. 65495 | 14371 | 31034 | 46345 |
| 12. 68122 | 14379 | 31108 | 46402 |
| 12. 70748 | 14402 | 31078 | 46326 |
| 12. 73374 | 14388 | 30932 | 46404 |
| 12. 76    | 14316 | 31014 | 46415 |
| 12. 78626 | 14373 | 30948 | 46385 |
| 12. 81252 | 14377 | 30993 | 46315 |
| 12. 83878 | 14348 | 30947 | 46413 |
| 12. 86504 | 14309 | 31032 | 46365 |
| 12. 8913  | 14398 | 31072 | 46300 |
| 12. 91756 | 14344 | 31024 | 46453 |
| 12. 94382 | 14414 | 31064 | 46365 |
| 12. 97008 | 14412 | 30983 | 46334 |
| 12. 99634 | 14280 | 31005 | 46367 |
| 13. 0226  | 14357 | 31033 | 46461 |
| 13. 04886 | 14354 | 31047 | 46446 |
| 13. 07512 | 14356 | 31104 | 46387 |
| 13. 10138 | 14338 | 30907 | 46368 |
| 13. 12764 | 14364 | 31095 | 46359 |
| 13. 15391 | 14372 | 31021 | 46393 |
| 13. 18017 | 14354 | 30827 | 46359 |
| 13. 20643 | 14300 | 31078 | 46429 |
| 13. 23269 | 14369 | 30956 | 46340 |
| 13. 25895 | 14412 | 30977 | 46293 |
| 13. 28521 | 14391 | 30958 | 46309 |
| 13. 31147 | 14309 | 30948 | 46449 |
| 13. 33773 | 14384 | 30881 | 46413 |
| 13. 36399 | 14425 | 30979 | 46375 |
| 13. 39025 | 14255 | 30893 | 46355 |
| 13. 41651 | 14366 | 30975 | 46348 |
| 13. 44277 | 14313 | 31062 | 46412 |

|           |       |       |       |
|-----------|-------|-------|-------|
| 13. 46903 | 14348 | 31037 | 46293 |
| 13. 49529 | 14322 | 30979 | 46269 |
| 13. 52155 | 14295 | 30962 | 46401 |
| 13. 54781 | 14372 | 30943 | 46313 |
| 13. 57407 | 14286 | 30843 | 46370 |
| 13. 60034 | 14361 | 30960 | 46365 |
| 13. 6266  | 14370 | 31027 | 46436 |
| 13. 65286 | 14321 | 31079 | 46449 |
| 13. 67912 | 14285 | 30878 | 46333 |
| 13. 70538 | 14332 | 30930 | 46246 |
| 13. 73164 | 14344 | 30974 | 46306 |
| 13. 7579  | 14387 | 30942 | 46406 |
| 13. 78416 | 14374 | 30910 | 46315 |
| 13. 81042 | 14305 | 30931 | 46250 |
| 13. 83668 | 14356 | 30871 | 46244 |
| 13. 86294 | 14389 | 30898 | 46420 |
| 13. 8892  | 14263 | 30920 | 46315 |
| 13. 91546 | 14191 | 30960 | 46295 |
| 13. 94172 | 14459 | 30881 | 46364 |
| 13. 96798 | 14323 | 30897 | 46261 |
| 13. 99424 | 14318 | 31085 | 46330 |
| 14. 0205  | 14333 | 30894 | 46323 |
| 14. 04676 | 14326 | 30981 | 46325 |
| 14. 07303 | 14415 | 30901 | 46415 |
| 14. 09929 | 14380 | 30972 | 46358 |
| 14. 12555 | 14390 | 30850 | 46435 |
| 14. 15181 | 14404 | 30914 | 46316 |
| 14. 17807 | 14503 | 30936 | 46348 |
| 14. 20433 | 14452 | 30957 | 46467 |
| 14. 23059 | 14354 | 30846 | 46275 |
| 14. 25685 | 14431 | 31019 | 46315 |
| 14. 28311 | 14521 | 30911 | 46363 |
| 14. 30937 | 14533 | 30895 | 46423 |
| 14. 33563 | 14646 | 30915 | 46439 |
| 14. 36189 | 14641 | 30831 | 46471 |
| 14. 38815 | 14675 | 30903 | 46508 |
| 14. 41441 | 14750 | 30916 | 46488 |
| 14. 44067 | 14873 | 30926 | 46654 |
| 14. 46693 | 14881 | 30969 | 46618 |
| 14. 49319 | 15079 | 30745 | 46562 |
| 14. 51945 | 15217 | 30979 | 46781 |
| 14. 54572 | 15433 | 30912 | 46927 |
| 14. 57198 | 15651 | 30841 | 47110 |
| 14. 59824 | 16038 | 30943 | 47322 |
| 14. 6245  | 16568 | 31018 | 47602 |
| 14. 65076 | 17249 | 31036 | 47880 |
| 14. 67702 | 18290 | 30934 | 48366 |
| 14. 70328 | 19703 | 30845 | 49056 |
| 14. 72954 | 21278 | 30868 | 49948 |
| 14. 7558  | 23526 | 30892 | 50943 |
| 14. 78206 | 24613 | 30854 | 52141 |
| 14. 80832 | 22892 | 30963 | 53319 |
| 14. 83458 | 19600 | 30927 | 54458 |
| 14. 86084 | 16742 | 30904 | 54799 |

|           |       |       |       |
|-----------|-------|-------|-------|
| 14. 8871  | 15502 | 30978 | 54031 |
| 14. 91336 | 15002 | 30852 | 52036 |
| 14. 93962 | 14808 | 30931 | 49768 |
| 14. 96588 | 14728 | 30864 | 48117 |
| 14. 99215 | 14729 | 30903 | 47247 |
| 15. 01841 | 14774 | 30984 | 46904 |
| 15. 04467 | 14754 | 30878 | 46731 |
| 15. 07093 | 14900 | 30969 | 46628 |
| 15. 09719 | 14897 | 30888 | 46654 |
| 15. 12345 | 15070 | 30932 | 46643 |
| 15. 14971 | 15070 | 30804 | 46580 |
| 15. 17597 | 15165 | 31011 | 46729 |
| 15. 20223 | 15295 | 30922 | 46739 |
| 15. 22849 | 15463 | 30897 | 46765 |
| 15. 25475 | 15662 | 30930 | 46913 |
| 15. 28101 | 15785 | 30820 | 46966 |
| 15. 30727 | 16171 | 31000 | 47145 |
| 15. 33353 | 16712 | 30902 | 47386 |
| 15. 35979 | 17134 | 30973 | 47560 |
| 15. 38605 | 17818 | 30916 | 47925 |
| 15. 41231 | 18730 | 30941 | 48299 |
| 15. 43857 | 20021 | 30861 | 48922 |
| 15. 46484 | 21814 | 30865 | 49668 |
| 15. 4911  | 24350 | 30890 | 50941 |
| 15. 51736 | 27165 | 30952 | 52308 |
| 15. 54362 | 31622 | 30801 | 54396 |
| 15. 56988 | 36780 | 30935 | 56999 |
| 15. 59614 | 40988 | 30840 | 59967 |
| 15. 6224  | 41834 | 30810 | 63722 |
| 15. 64866 | 37376 | 30947 | 67001 |
| 15. 67492 | 29955 | 30895 | 68999 |
| 15. 70118 | 23019 | 31003 | 69159 |
| 15. 72744 | 18746 | 30930 | 66818 |
| 15. 7537  | 16882 | 30848 | 62151 |
| 15. 77996 | 15833 | 30835 | 56699 |
| 15. 80622 | 15350 | 30911 | 52230 |
| 15. 83248 | 15101 | 30908 | 49485 |
| 15. 85874 | 15011 | 30850 | 48160 |
| 15. 885   | 14950 | 30885 | 47562 |
| 15. 91126 | 14771 | 30957 | 47199 |
| 15. 93753 | 14779 | 30897 | 46980 |
| 15. 96379 | 14584 | 30876 | 46799 |
| 15. 99005 | 14592 | 30928 | 46730 |
| 16. 01631 | 14495 | 30877 | 46657 |
| 16. 04257 | 14505 | 30856 | 46512 |
| 16. 06883 | 14468 | 30976 | 46528 |
| 16. 09509 | 14483 | 30861 | 46555 |
| 16. 12135 | 14477 | 30958 | 46422 |
| 16. 14761 | 14438 | 30960 | 46467 |
| 16. 17387 | 14388 | 30904 | 46535 |
| 16. 20013 | 14418 | 30879 | 46462 |
| 16. 22639 | 14363 | 30970 | 46353 |
| 16. 25265 | 14306 | 31017 | 46387 |
| 16. 27891 | 14400 | 30940 | 46372 |

|           |       |       |       |
|-----------|-------|-------|-------|
| 16. 30517 | 14313 | 30932 | 46335 |
| 16. 33143 | 14325 | 31005 | 46251 |
| 16. 35769 | 14314 | 31032 | 46287 |
| 16. 38396 | 14365 | 30898 | 46323 |
| 16. 41022 | 14320 | 30934 | 46329 |
| 16. 43648 | 14446 | 31007 | 46306 |
| 16. 46274 | 14430 | 30926 | 46079 |
| 16. 489   | 14435 | 30879 | 46225 |
| 16. 51526 | 14338 | 30931 | 46286 |
| 16. 54152 | 14336 | 30924 | 46216 |
| 16. 56778 | 14341 | 30997 | 46263 |
| 16. 59404 | 14231 | 31035 | 46153 |
| 16. 6203  | 14263 | 31007 | 46078 |
| 16. 64656 | 14325 | 31016 | 46119 |
| 16. 67282 | 14369 | 31040 | 46134 |
| 16. 69908 | 14319 | 30945 | 46115 |
| 16. 72534 | 14418 | 30959 | 46008 |
| 16. 7516  | 14517 | 31077 | 46123 |
| 16. 77786 | 14457 | 30984 | 46112 |
| 16. 80412 | 14466 | 30964 | 46085 |
| 16. 83038 | 14501 | 31070 | 46052 |
| 16. 85665 | 14434 | 31023 | 46099 |
| 16. 88291 | 14294 | 30985 | 46017 |
| 16. 90917 | 14273 | 31037 | 46070 |
| 16. 93543 | 14214 | 31084 | 46018 |
| 16. 96169 | 14253 | 31102 | 46054 |
| 16. 98795 | 14233 | 31131 | 45964 |
| 17. 01421 | 14150 | 31114 | 46023 |
| 17. 04047 | 14125 | 30949 | 46025 |
| 17. 06673 | 14179 | 30943 | 45975 |
| 17. 09299 | 14198 | 31077 | 46042 |
| 17. 11925 | 14066 | 31128 | 45970 |
| 17. 14551 | 14181 | 31052 | 46005 |
| 17. 17177 | 14125 | 31169 | 45922 |
| 17. 19803 | 14153 | 31071 | 45952 |
| 17. 22429 | 14136 | 31221 | 45928 |
| 17. 25055 | 14081 | 31050 | 45904 |
| 17. 27681 | 14073 | 31041 | 46029 |
| 17. 30307 | 14124 | 31123 | 45839 |
| 17. 32934 | 14098 | 31091 | 45973 |
| 17. 3556  | 14135 | 31191 | 45790 |
| 17. 38186 | 14166 | 31137 | 45939 |
| 17. 40812 | 14062 | 31080 | 45873 |
| 17. 43438 | 14061 | 31149 | 45904 |
| 17. 46064 | 14075 | 31245 | 45907 |
| 17. 4869  | 14035 | 31066 | 45930 |
| 17. 51316 | 14078 | 31207 | 45824 |
| 17. 53942 | 14090 | 31206 | 45828 |
| 17. 56568 | 14040 | 31106 | 45900 |
| 17. 59194 | 14054 | 31320 | 45943 |
| 17. 6182  | 14070 | 31183 | 45883 |
| 17. 64446 | 14039 | 31224 | 45845 |
| 17. 67072 | 14050 | 31164 | 45887 |
| 17. 69698 | 14005 | 31183 | 45878 |

|           |       |       |       |
|-----------|-------|-------|-------|
| 17. 72324 | 14043 | 31216 | 45892 |
| 17. 7495  | 14007 | 31265 | 45920 |
| 17. 77577 | 14038 | 31299 | 45846 |
| 17. 80203 | 14042 | 31139 | 45882 |
| 17. 82829 | 14105 | 31175 | 45859 |
| 17. 85455 | 14007 | 31283 | 45837 |
| 17. 88081 | 13990 | 31345 | 45840 |
| 17. 90707 | 13997 | 31376 | 45878 |
| 17. 93333 | 14070 | 31252 | 45786 |
| 17. 95959 | 14060 | 31341 | 45838 |
| 17. 98585 | 13983 | 31286 | 45750 |
| 18. 01211 | 14049 | 31303 | 45777 |
| 18. 03837 | 14055 | 31422 | 45808 |
| 18. 06463 | 14034 | 31398 | 45811 |
| 18. 09089 | 13956 | 31321 | 45826 |
| 18. 11715 | 13974 | 31339 | 45798 |
| 18. 14341 | 14006 | 31437 | 45853 |
| 18. 16967 | 13999 | 31259 | 45779 |
| 18. 19593 | 14064 | 31485 | 45859 |
| 18. 22219 | 14027 | 31442 | 45821 |
| 18. 24846 | 14036 | 31524 | 45710 |
| 18. 27472 | 13970 | 31400 | 45769 |
| 18. 30098 | 14025 | 31483 | 45820 |
| 18. 32724 | 14007 | 31438 | 45874 |
| 18. 3535  | 13989 | 31584 | 45817 |
| 18. 37976 | 14039 | 31382 | 45820 |
| 18. 40602 | 14038 | 31426 | 45816 |
| 18. 43228 | 14005 | 31384 | 45778 |
| 18. 45854 | 14005 | 31494 | 45838 |
| 18. 4848  | 13997 | 31536 | 45758 |
| 18. 51106 | 14003 | 31555 | 45793 |
| 18. 53732 | 13944 | 31523 | 45810 |
| 18. 56358 | 13940 | 31632 | 45784 |
| 18. 58984 | 13977 | 31568 | 45770 |
| 18. 6161  | 13978 | 31581 | 45823 |
| 18. 64236 | 13995 | 31574 | 45829 |
| 18. 66862 | 13989 | 31610 | 45761 |
| 18. 69488 | 14015 | 31631 | 45863 |
| 18. 72115 | 14026 | 31572 | 45713 |
| 18. 74741 | 13969 | 31594 | 45712 |
| 18. 77367 | 13969 | 31522 | 45792 |
| 18. 79993 | 14040 | 31608 | 45792 |
| 18. 82619 | 14019 | 31642 | 45789 |
| 18. 85245 | 13997 | 31582 | 45776 |
| 18. 87871 | 13925 | 31654 | 45757 |
| 18. 90497 | 13925 | 31740 | 45804 |
| 18. 93123 | 14039 | 31774 | 45874 |
| 18. 95749 | 13931 | 31637 | 45816 |
| 18. 98375 | 13962 | 31656 | 45755 |
| 19. 01001 | 13870 | 31670 | 45795 |
| 19. 03627 | 13979 | 31681 | 45750 |
| 19. 06253 | 13961 | 31688 | 45744 |
| 19. 08879 | 13963 | 31704 | 45722 |
| 19. 11505 | 13994 | 31797 | 45827 |

|           |       |       |       |
|-----------|-------|-------|-------|
| 19. 14131 | 13920 | 31797 | 45749 |
| 19. 16758 | 13927 | 31995 | 45791 |
| 19. 19384 | 13888 | 31855 | 45862 |
| 19. 2201  | 13877 | 31749 | 45798 |
| 19. 24636 | 13929 | 31738 | 45764 |
| 19. 27262 | 13895 | 31810 | 45819 |
| 19. 29888 | 13891 | 31954 | 45882 |
| 19. 32514 | 13979 | 31790 | 45830 |
| 19. 3514  | 13875 | 31838 | 45861 |
| 19. 37766 | 13974 | 31858 | 45851 |
| 19. 40392 | 13981 | 31864 | 45769 |
| 19. 43018 | 13891 | 31821 | 45822 |
| 19. 45644 | 13943 | 31910 | 45883 |
| 19. 4827  | 13944 | 31942 | 45893 |
| 19. 50896 | 14018 | 31964 | 45792 |
| 19. 53522 | 13998 | 31985 | 45860 |
| 19. 56148 | 14001 | 31954 | 45900 |
| 19. 58774 | 13980 | 31970 | 45871 |
| 19. 614   | 13958 | 31878 | 45970 |
| 19. 64027 | 14013 | 31914 | 45873 |
| 19. 66653 | 14009 | 31868 | 46026 |
| 19. 69279 | 14023 | 31979 | 45980 |
| 19. 71905 | 14012 | 31941 | 45893 |
| 19. 74531 | 14003 | 32001 | 45982 |
| 19. 77157 | 14021 | 31864 | 46017 |
| 19. 79783 | 14052 | 32007 | 46019 |
| 19. 82409 | 14026 | 31902 | 45946 |
| 19. 85035 | 14010 | 31902 | 45985 |
| 19. 87661 | 14112 | 31794 | 45956 |
| 19. 90287 | 14066 | 32011 | 46031 |
| 19. 92913 | 14123 | 32011 | 45979 |
| 19. 95539 | 14136 | 31875 | 46167 |
| 19. 98165 | 14207 | 31950 | 46035 |
| 20. 00791 | 14207 | 31980 | 46185 |
| 20. 03417 | 14252 | 31939 | 46199 |
| 20. 06043 | 14409 | 31982 | 46178 |
| 20. 08669 | 14491 | 32066 | 46302 |
| 20. 11296 | 14442 | 31963 | 46357 |
| 20. 13922 | 14690 | 31857 | 46473 |
| 20. 16548 | 14743 | 31945 | 46516 |
| 20. 19174 | 14842 | 31911 | 46626 |
| 20. 218   | 14917 | 31898 | 46757 |
| 20. 24426 | 14708 | 31960 | 46899 |
| 20. 27052 | 14529 | 32004 | 46955 |
| 20. 29678 | 14369 | 31880 | 46899 |
| 20. 32304 | 14258 | 31918 | 46838 |
| 20. 3493  | 14209 | 31868 | 46679 |
| 20. 37556 | 14105 | 31815 | 46481 |
| 20. 40182 | 14114 | 31824 | 46251 |
| 20. 42808 | 14070 | 31952 | 46207 |
| 20. 45434 | 13994 | 31954 | 46150 |
| 20. 4806  | 13997 | 31785 | 46128 |
| 20. 50686 | 13966 | 31841 | 46023 |
| 20. 53312 | 13946 | 31796 | 45998 |

|           |       |       |       |
|-----------|-------|-------|-------|
| 20. 55938 | 13878 | 31872 | 45862 |
| 20. 58565 | 13949 | 31775 | 45955 |
| 20. 61191 | 13978 | 31806 | 45885 |
| 20. 63817 | 13909 | 31764 | 45936 |
| 20. 66443 | 13900 | 31759 | 45886 |
| 20. 69069 | 13895 | 31795 | 45703 |
| 20. 71695 | 13917 | 31724 | 45716 |
| 20. 74321 | 13930 | 31809 | 45820 |
| 20. 76947 | 13923 | 31693 | 45816 |
| 20. 79573 | 13878 | 31658 | 45790 |
| 20. 82199 | 13847 | 31791 | 45860 |
| 20. 84825 | 13874 | 31835 | 45809 |
| 20. 87451 | 13851 | 31767 | 45726 |
| 20. 90077 | 13893 | 31623 | 45778 |
| 20. 92703 | 13836 | 31690 | 45717 |
| 20. 95329 | 13803 | 31641 | 45664 |
| 20. 97955 | 13894 | 31652 | 45678 |
| 21. 00581 | 13836 | 31458 | 45757 |
| 21. 03208 | 13879 | 31606 | 45748 |
| 21. 05834 | 13844 | 31606 | 45753 |
| 21. 0846  | 13785 | 31498 | 45779 |
| 21. 11086 | 13777 | 31554 | 45647 |
| 21. 13712 | 13842 | 31454 | 45711 |
| 21. 16338 | 13822 | 31412 | 45642 |
| 21. 18964 | 13794 | 31534 | 45669 |
| 21. 2159  | 13932 | 31443 | 45642 |
| 21. 24216 | 13756 | 31485 | 45666 |
| 21. 26842 | 13879 | 31509 | 45724 |
| 21. 29468 | 13829 | 31591 | 45696 |
| 21. 32094 | 13835 | 31576 | 45675 |
| 21. 3472  | 13845 | 31378 | 45642 |
| 21. 37346 | 13822 | 31512 | 45680 |
| 21. 39972 | 13790 | 31497 | 45646 |
| 21. 42598 | 13826 | 31335 | 45602 |
| 21. 45224 | 13822 | 31480 | 45617 |
| 21. 4785  | 13799 | 31396 | 45636 |
| 21. 50477 | 13774 | 31354 | 45672 |
| 21. 53103 | 13777 | 31336 | 45618 |
| 21. 55729 | 13814 | 31299 | 45584 |
| 21. 58355 | 13746 | 31266 | 45647 |
| 21. 60981 | 13785 | 31302 | 45739 |
| 21. 63607 | 13863 | 31294 | 45592 |
| 21. 66233 | 13818 | 31249 | 45650 |
| 21. 68859 | 13826 | 31316 | 45642 |
| 21. 71485 | 13823 | 31176 | 45610 |
| 21. 74111 | 13751 | 31276 | 45700 |
| 21. 76737 | 13814 | 31298 | 45647 |
| 21. 79363 | 13791 | 31199 | 45702 |
| 21. 81989 | 13710 | 31166 | 45647 |
| 21. 84615 | 13776 | 31175 | 45704 |
| 21. 87241 | 13787 | 31178 | 45695 |
| 21. 89867 | 13870 | 31144 | 45695 |
| 21. 92493 | 13844 | 31111 | 45607 |
| 21. 95119 | 13908 | 31213 | 45679 |

|           |       |       |       |
|-----------|-------|-------|-------|
| 21. 97746 | 13860 | 31056 | 45645 |
| 22. 00372 | 13877 | 31128 | 45738 |
| 22. 02998 | 13949 | 31144 | 45791 |
| 22. 05624 | 13894 | 30951 | 45817 |
| 22. 0825  | 14062 | 31059 | 45795 |
| 22. 10876 | 14088 | 31032 | 45931 |
| 22. 13502 | 14242 | 30997 | 46013 |
| 22. 16128 | 14402 | 31049 | 46227 |
| 22. 18754 | 14701 | 31011 | 46412 |
| 22. 2138  | 15050 | 31029 | 46731 |
| 22. 24006 | 15198 | 30906 | 46814 |
| 22. 26632 | 14978 | 31007 | 47172 |
| 22. 29258 | 14548 | 30973 | 47566 |
| 22. 31884 | 14216 | 30996 | 47709 |
| 22. 3451  | 13994 | 30918 | 47682 |
| 22. 37136 | 13891 | 30868 | 47420 |
| 22. 39762 | 13765 | 30893 | 46811 |
| 22. 42389 | 13737 | 30943 | 46433 |
| 22. 45015 | 13763 | 30941 | 46181 |
| 22. 47641 | 13781 | 31012 | 45902 |
| 22. 50267 | 13770 | 30899 | 45769 |
| 22. 52893 | 13782 | 30790 | 45692 |
| 22. 55519 | 13738 | 30828 | 45609 |
| 22. 58145 | 13774 | 30764 | 45643 |
| 22. 60771 | 13743 | 30833 | 45671 |
| 22. 63397 | 13767 | 30803 | 45742 |
| 22. 66023 | 13770 | 30766 | 45580 |
| 22. 68649 | 13801 | 30662 | 45648 |
| 22. 71275 | 13761 | 30754 | 45564 |
| 22. 73901 | 13736 | 30748 | 45617 |
| 22. 76527 | 13706 | 30754 | 45640 |
| 22. 79153 | 13745 | 30715 | 45560 |
| 22. 81779 | 13725 | 30734 | 45653 |
| 22. 84405 | 13735 | 30733 | 45473 |
| 22. 87031 | 13758 | 30792 | 45631 |
| 22. 89658 | 13642 | 30643 | 45603 |
| 22. 92284 | 13745 | 30688 | 45598 |
| 22. 9491  | 13764 | 30664 | 45640 |
| 22. 97536 | 13735 | 30896 | 45676 |
| 23. 00162 | 13721 | 30691 | 45592 |
| 23. 02788 | 13784 | 30666 | 45579 |
| 23. 05414 | 13772 | 30655 | 45601 |
| 23. 0804  | 13787 | 30621 | 45518 |
| 23. 10666 | 13759 | 30774 | 45577 |
| 23. 13292 | 13743 | 30647 | 45558 |
| 23. 15918 | 13730 | 30522 | 45533 |
| 23. 18544 | 13736 | 30615 | 45582 |
| 23. 2117  | 13724 | 30587 | 45595 |
| 23. 23796 | 13734 | 30573 | 45650 |
| 23. 26422 | 13686 | 30651 | 45546 |
| 23. 29048 | 13785 | 30565 | 45604 |
| 23. 31674 | 13779 | 30469 | 45485 |
| 23. 343   | 13801 | 30455 | 45556 |
| 23. 36927 | 13791 | 30540 | 45574 |

|           |       |       |       |
|-----------|-------|-------|-------|
| 23. 39553 | 13719 | 30439 | 45557 |
| 23. 42179 | 13768 | 30497 | 45513 |
| 23. 44805 | 13748 | 30425 | 45538 |
| 23. 47431 | 13730 | 30435 | 45532 |
| 23. 50057 | 13774 | 30450 | 45651 |
| 23. 52683 | 13779 | 30478 | 45505 |
| 23. 55309 | 13753 | 30564 | 45612 |
| 23. 57935 | 13778 | 30475 | 45593 |
| 23. 60561 | 13742 | 30422 | 45642 |
| 23. 63187 | 13724 | 30503 | 45515 |
| 23. 65813 | 13709 | 30412 | 45581 |
| 23. 68439 | 13726 | 30435 | 45609 |
| 23. 71065 | 13746 | 30503 | 45597 |
| 23. 73691 | 13707 | 30429 | 45549 |
| 23. 76317 | 13729 | 30384 | 45527 |
| 23. 78943 | 13747 | 30463 | 45506 |
| 23. 8157  | 13753 | 30460 | 45488 |
| 23. 84196 | 13661 | 30422 | 45586 |
| 23. 86822 | 13729 | 30397 | 45553 |
| 23. 89448 | 13728 | 30441 | 45580 |
| 23. 92074 | 13677 | 30339 | 45514 |
| 23. 947   | 13739 | 30385 | 45501 |
| 23. 97326 | 13698 | 30338 | 45528 |
| 23. 99952 | 13730 | 30485 | 45541 |
| 24. 02578 | 13686 | 30380 | 45498 |
| 24. 05204 | 13658 | 30388 | 45563 |
| 24. 0783  | 13693 | 30378 | 45527 |
| 24. 10456 | 13706 | 30357 | 45521 |
| 24. 13082 | 13651 | 30347 | 45519 |
| 24. 15708 | 13687 | 30314 | 45579 |
| 24. 18334 | 13718 | 30259 | 45493 |
| 24. 2096  | 13650 | 30335 | 45562 |
| 24. 23586 | 13673 | 30255 | 45539 |
| 24. 26212 | 13703 | 30273 | 45534 |
| 24. 28839 | 13699 | 30271 | 45510 |
| 24. 31465 | 13741 | 30406 | 45559 |
| 24. 34091 | 13711 | 30190 | 45534 |
| 24. 36717 | 13722 | 30188 | 45628 |
| 24. 39343 | 13708 | 30315 | 45605 |
| 24. 41969 | 13741 | 30273 | 45542 |
| 24. 44595 | 13706 | 30241 | 45488 |
| 24. 47221 | 13692 | 30312 | 45560 |
| 24. 49847 | 13694 | 30143 | 45573 |
| 24. 52473 | 13705 | 30176 | 45562 |
| 24. 55099 | 13695 | 30316 | 45478 |
| 24. 57725 | 13678 | 30303 | 45518 |
| 24. 60351 | 13654 | 30210 | 45539 |
| 24. 62977 | 13652 | 30232 | 45494 |
| 24. 65603 | 13710 | 30175 | 45503 |
| 24. 68229 | 13648 | 30247 | 45488 |
| 24. 70855 | 13671 | 30140 | 45524 |
| 24. 73481 | 13677 | 30167 | 45485 |
| 24. 76108 | 13667 | 30116 | 45517 |
| 24. 78734 | 13693 | 30149 | 45472 |

|           |       |       |       |
|-----------|-------|-------|-------|
| 24. 8136  | 13711 | 30180 | 45490 |
| 24. 83986 | 13712 | 30189 | 45453 |
| 24. 86612 | 13724 | 30074 | 45493 |
| 24. 89238 | 13733 | 30179 | 45505 |
| 24. 91864 | 13689 | 30201 | 45504 |
| 24. 9449  | 13728 | 30207 | 45525 |
| 24. 97116 | 13749 | 30051 | 45520 |
| 24. 99742 | 13840 | 30148 | 45573 |
| 25. 02368 | 13719 | 30154 | 45567 |
| 25. 04994 | 13785 | 30187 | 45594 |
| 25. 0762  | 13839 | 30173 | 45631 |
| 25. 10246 | 13867 | 30087 | 45608 |
| 25. 12872 | 13990 | 30123 | 45682 |
| 25. 15498 | 13908 | 30114 | 45663 |
| 25. 18124 | 13841 | 30112 | 45776 |
| 25. 20751 | 13831 | 30093 | 45816 |
| 25. 23377 | 13814 | 30081 | 45698 |
| 25. 26003 | 13793 | 30064 | 45783 |
| 25. 28629 | 13771 | 30019 | 45797 |
| 25. 31255 | 13744 | 30063 | 45719 |
| 25. 33881 | 13765 | 30113 | 45688 |
| 25. 36507 | 13740 | 30031 | 45630 |
| 25. 39133 | 13776 | 30160 | 45652 |
| 25. 41759 | 13785 | 29955 | 45628 |
| 25. 44385 | 13816 | 30118 | 45621 |
| 25. 47011 | 13891 | 30010 | 45605 |
| 25. 49637 | 13857 | 30054 | 45609 |
| 25. 52263 | 13820 | 30044 | 45663 |
| 25. 54889 | 13895 | 30048 | 45729 |
| 25. 57515 | 13944 | 30041 | 45762 |
| 25. 60141 | 13952 | 30038 | 45837 |
| 25. 62767 | 14073 | 30016 | 45922 |
| 25. 65393 | 14193 | 30042 | 46048 |
| 25. 6802  | 14371 | 29991 | 46107 |
| 25. 70646 | 14454 | 30054 | 46250 |
| 25. 73272 | 14363 | 30101 | 46341 |
| 25. 75898 | 14255 | 29986 | 46470 |
| 25. 78524 | 14220 | 29920 | 46605 |
| 25. 8115  | 14091 | 30031 | 46589 |
| 25. 83776 | 14121 | 30033 | 46651 |
| 25. 86402 | 14052 | 29962 | 46504 |
| 25. 89028 | 14139 | 30003 | 46328 |
| 25. 91654 | 14223 | 30032 | 46220 |
| 25. 9428  | 14327 | 29908 | 46227 |
| 25. 96906 | 14485 | 29922 | 46380 |
| 25. 99532 | 14601 | 29839 | 46378 |
| 26. 02158 | 14868 | 29977 | 46496 |
| 26. 04784 | 15138 | 29972 | 46774 |
| 26. 0741  | 15504 | 29994 | 46989 |
| 26. 10036 | 16024 | 30032 | 47594 |
| 26. 12662 | 16387 | 29951 | 47959 |
| 26. 15289 | 17075 | 29930 | 48447 |
| 26. 17915 | 17301 | 30030 | 48995 |
| 26. 20541 | 17367 | 29983 | 49766 |

|           |       |       |       |
|-----------|-------|-------|-------|
| 26. 23167 | 16970 | 29868 | 50311 |
| 26. 25793 | 16665 | 29901 | 50664 |
| 26. 28419 | 15883 | 29952 | 51089 |
| 26. 31045 | 15239 | 29946 | 50783 |
| 26. 33671 | 14972 | 29898 | 50141 |
| 26. 36297 | 14618 | 29991 | 49493 |
| 26. 38923 | 14420 | 29852 | 48724 |
| 26. 41549 | 14219 | 29814 | 47859 |
| 26. 44175 | 14180 | 29984 | 47320 |
| 26. 46801 | 14100 | 29872 | 47022 |
| 26. 49427 | 14011 | 29867 | 46697 |
| 26. 52053 | 13949 | 29869 | 46394 |
| 26. 54679 | 13935 | 30015 | 46257 |
| 26. 57305 | 13939 | 29824 | 46166 |
| 26. 59932 | 13835 | 29986 | 45980 |
| 26. 62558 | 13876 | 29870 | 45935 |
| 26. 65184 | 13848 | 29951 | 45892 |
| 26. 6781  | 13840 | 29852 | 45896 |
| 26. 70436 | 13796 | 29848 | 45784 |
| 26. 73062 | 13779 | 29811 | 45798 |
| 26. 75688 | 13819 | 29826 | 45840 |
| 26. 78314 | 13818 | 29906 | 45642 |
| 26. 8094  | 13800 | 29926 | 45715 |
| 26. 83566 | 13814 | 29874 | 45732 |
| 26. 86192 | 13754 | 29796 | 45614 |
| 26. 88818 | 13767 | 29879 | 45626 |
| 26. 91444 | 13770 | 29845 | 45626 |
| 26. 9407  | 13738 | 29847 | 45578 |
| 26. 96696 | 13738 | 29797 | 45568 |
| 26. 99322 | 13760 | 29779 | 45598 |
| 27. 01948 | 13803 | 29807 | 45580 |
| 27. 04574 | 13770 | 29807 | 45563 |
| 27. 07201 | 13776 | 29751 | 45658 |
| 27. 09827 | 13696 | 29791 | 45630 |
| 27. 12453 | 13718 | 29776 | 45625 |
| 27. 15079 | 13753 | 29797 | 45580 |
| 27. 17705 | 13732 | 29849 | 45563 |
| 27. 20331 | 13792 | 29856 | 45583 |
| 27. 22957 | 13775 | 29852 | 45487 |
| 27. 25583 | 13842 | 29773 | 45501 |
| 27. 28209 | 13776 | 29841 | 45546 |
| 27. 30835 | 13856 | 29778 | 45571 |
| 27. 33461 | 13880 | 29836 | 45590 |
| 27. 36087 | 13939 | 29861 | 45591 |
| 27. 38713 | 13931 | 29819 | 45509 |
| 27. 41339 | 14109 | 29835 | 45627 |
| 27. 43965 | 14224 | 29744 | 45660 |
| 27. 46591 | 14443 | 29765 | 45741 |
| 27. 49217 | 14801 | 29798 | 45966 |
| 27. 51843 | 15158 | 29830 | 46197 |
| 27. 5447  | 15729 | 29787 | 46290 |
| 27. 57096 | 16462 | 29762 | 46735 |
| 27. 59722 | 17122 | 29731 | 47042 |
| 27. 62348 | 17239 | 29815 | 47751 |

|           |       |       |       |
|-----------|-------|-------|-------|
| 27. 64974 | 16777 | 29892 | 48314 |
| 27. 676   | 16106 | 29865 | 48752 |
| 27. 70226 | 15449 | 29771 | 49125 |
| 27. 72852 | 14814 | 29728 | 49225 |
| 27. 75478 | 14273 | 29806 | 48467 |
| 27. 78104 | 14072 | 29790 | 47943 |
| 27. 8073  | 13911 | 29706 | 47151 |
| 27. 83356 | 13829 | 29830 | 46523 |
| 27. 85982 | 13841 | 29784 | 46054 |
| 27. 88608 | 13770 | 29771 | 45897 |
| 27. 91234 | 13763 | 29728 | 45809 |
| 27. 9386  | 13760 | 29694 | 45547 |
| 27. 96486 | 13725 | 29671 | 45510 |
| 27. 99112 | 13680 | 29747 | 45547 |
| 28. 01739 | 13760 | 29767 | 45556 |
| 28. 04365 | 13753 | 29744 | 45496 |
| 28. 06991 | 13745 | 29695 | 45456 |
| 28. 09617 | 13677 | 29637 | 45509 |
| 28. 12243 | 13768 | 29622 | 45471 |
| 28. 14869 | 13774 | 29760 | 45436 |
| 28. 17495 | 13730 | 29746 | 45412 |
| 28. 20121 | 13739 | 29822 | 45442 |
| 28. 22747 | 13757 | 29654 | 45445 |
| 28. 25373 | 13784 | 29744 | 45424 |
| 28. 27999 | 13823 | 29573 | 45464 |
| 28. 30625 | 13830 | 29683 | 45497 |
| 28. 33251 | 13816 | 29646 | 45399 |
| 28. 35877 | 13838 | 29656 | 45441 |
| 28. 38503 | 13845 | 29710 | 45497 |
| 28. 41129 | 13844 | 29631 | 45510 |
| 28. 43755 | 13884 | 29655 | 45517 |
| 28. 46382 | 13954 | 29673 | 45551 |
| 28. 49008 | 13972 | 29580 | 45582 |
| 28. 51634 | 14013 | 29664 | 45691 |
| 28. 5426  | 14115 | 29643 | 45637 |
| 28. 56886 | 14126 | 29660 | 45590 |
| 28. 59512 | 14168 | 29706 | 45640 |
| 28. 62138 | 14191 | 29684 | 45741 |
| 28. 64764 | 14160 | 29644 | 45888 |
| 28. 6739  | 14036 | 29572 | 45856 |
| 28. 70016 | 13996 | 29659 | 45808 |
| 28. 72642 | 14009 | 29646 | 45900 |
| 28. 75268 | 13840 | 29684 | 45811 |
| 28. 77894 | 13848 | 29654 | 45760 |
| 28. 8052  | 13870 | 29666 | 45685 |
| 28. 83146 | 13928 | 29649 | 45609 |
| 28. 85772 | 13924 | 29633 | 45599 |
| 28. 88398 | 13950 | 29606 | 45612 |
| 28. 91024 | 13962 | 29639 | 45649 |
| 28. 93651 | 14003 | 29742 | 45738 |
| 28. 96277 | 14116 | 29589 | 45862 |
| 28. 98903 | 14299 | 29647 | 45854 |
| 29. 01529 | 14391 | 29641 | 45962 |
| 29. 04155 | 14691 | 29629 | 46043 |

|           |       |       |       |
|-----------|-------|-------|-------|
| 29. 06781 | 14939 | 29680 | 46316 |
| 29. 09407 | 15429 | 29750 | 46677 |
| 29. 12033 | 16057 | 29632 | 47171 |
| 29. 14659 | 16907 | 29662 | 47720 |
| 29. 17285 | 17958 | 29755 | 48437 |
| 29. 19911 | 18810 | 29714 | 49466 |
| 29. 22537 | 19250 | 29715 | 50655 |
| 29. 25163 | 18954 | 29729 | 51894 |
| 29. 27789 | 18028 | 29697 | 52858 |
| 29. 30415 | 17147 | 29655 | 53544 |
| 29. 33041 | 16184 | 29726 | 53657 |
| 29. 35667 | 15252 | 29827 | 53194 |
| 29. 38293 | 14615 | 29711 | 51826 |
| 29. 4092  | 14193 | 29751 | 50373 |
| 29. 43546 | 14026 | 29705 | 48925 |
| 29. 46172 | 13941 | 29680 | 47878 |
| 29. 48798 | 13882 | 29683 | 47023 |
| 29. 51424 | 13858 | 29619 | 46360 |
| 29. 5405  | 13865 | 29606 | 46143 |
| 29. 56676 | 13816 | 29624 | 45853 |
| 29. 59302 | 13876 | 29558 | 45776 |
| 29. 61928 | 13943 | 29599 | 45693 |
| 29. 64554 | 14043 | 29563 | 45756 |
| 29. 6718  | 14205 | 29556 | 45677 |
| 29. 69806 | 14251 | 29552 | 45728 |
| 29. 72432 | 14284 | 29592 | 45783 |
| 29. 75058 | 14162 | 29478 | 45897 |
| 29. 77684 | 14046 | 29525 | 45879 |
| 29. 8031  | 14055 | 29505 | 45878 |
| 29. 82936 | 13867 | 29450 | 45824 |
| 29. 85563 | 13781 | 29518 | 45707 |
| 29. 88189 | 13680 | 29546 | 45688 |
| 29. 90815 | 13706 | 29508 | 45596 |
| 29. 93441 | 13648 | 29552 | 45443 |
| 29. 96067 | 13659 | 29500 | 45414 |
| 29. 98693 | 13611 | 29492 | 45365 |
| 30. 01319 | 13599 | 29507 | 45427 |
| 30. 03945 | 13631 | 29471 | 45353 |
| 30. 06571 | 13642 | 29479 | 45322 |
| 30. 09197 | 13605 | 29487 | 45377 |
| 30. 11823 | 13629 | 29565 | 45330 |
| 30. 14449 | 13663 | 29571 | 45321 |
| 30. 17075 | 13682 | 29527 | 45373 |
| 30. 19701 | 13644 | 29473 | 45382 |
| 30. 22327 | 13641 | 29567 | 45356 |
| 30. 24953 | 13676 | 29469 | 45360 |
| 30. 27579 | 13644 | 29506 | 45276 |
| 30. 30205 | 13699 | 29510 | 45356 |
| 30. 32832 | 13679 | 29445 | 45396 |
| 30. 35458 | 13767 | 29527 | 45394 |
| 30. 38084 | 13747 | 29393 | 45394 |
| 30. 4071  | 13815 | 29450 | 45398 |
| 30. 43336 | 13940 | 29462 | 45427 |
| 30. 45962 | 13944 | 29434 | 45545 |

|           |       |       |       |
|-----------|-------|-------|-------|
| 30. 48588 | 14058 | 29439 | 45558 |
| 30. 51214 | 14206 | 29555 | 45734 |
| 30. 5384  | 14478 | 29466 | 45919 |
| 30. 56466 | 14840 | 29490 | 46257 |
| 30. 59092 | 15390 | 29400 | 46662 |
| 30. 61718 | 16298 | 29430 | 46926 |
| 30. 64344 | 17205 | 29472 | 47593 |
| 30. 6697  | 17658 | 29513 | 48534 |
| 30. 69596 | 17345 | 29448 | 49422 |
| 30. 72222 | 16497 | 29452 | 50243 |
| 30. 74848 | 15917 | 29384 | 50750 |
| 30. 77474 | 15137 | 29408 | 50718 |
| 30. 80101 | 14507 | 29375 | 50198 |
| 30. 82727 | 14077 | 29463 | 49186 |
| 30. 85353 | 13831 | 29419 | 48284 |
| 30. 87979 | 13801 | 29396 | 47392 |
| 30. 90605 | 13710 | 29455 | 46596 |
| 30. 93231 | 13740 | 29450 | 46000 |
| 30. 95857 | 13748 | 29417 | 45679 |
| 30. 98483 | 13675 | 29239 | 45606 |
| 31. 01109 | 13610 | 29449 | 45502 |
| 31. 03735 | 13616 | 29412 | 45405 |
| 31. 06361 | 13620 | 29464 | 45305 |
| 31. 08987 | 13607 | 29383 | 45241 |
| 31. 11613 | 13571 | 29446 | 45347 |
| 31. 14239 | 13559 | 29373 | 45313 |
| 31. 16865 | 13584 | 29441 | 45332 |
| 31. 19491 | 13632 | 29367 | 45240 |
| 31. 22117 | 13609 | 29421 | 45246 |
| 31. 24744 | 13643 | 29364 | 45221 |
| 31. 2737  | 13622 | 29438 | 45330 |
| 31. 29996 | 13678 | 29475 | 45317 |
| 31. 32622 | 13643 | 29362 | 45279 |
| 31. 35248 | 13669 | 29389 | 45301 |
| 31. 37874 | 13687 | 29347 | 45316 |
| 31. 405   | 13700 | 29420 | 45339 |
| 31. 43126 | 13739 | 29401 | 45270 |
| 31. 45752 | 13744 | 29400 | 45258 |
| 31. 48378 | 13708 | 29377 | 45293 |
| 31. 51004 | 13734 | 29360 | 45340 |
| 31. 5363  | 13694 | 29386 | 45278 |
| 31. 56256 | 13729 | 29391 | 45303 |
| 31. 58882 | 13649 | 29409 | 45280 |
| 31. 61508 | 13612 | 29370 | 45202 |
| 31. 64134 | 13588 | 29430 | 45315 |
| 31. 6676  | 13600 | 29410 | 45327 |
| 31. 69386 | 13624 | 29386 | 45264 |
| 31. 72013 | 13626 | 29356 | 45241 |
| 31. 74639 | 13607 | 29354 | 45194 |
| 31. 77265 | 13637 | 29345 | 45204 |
| 31. 79891 | 13616 | 29296 | 45209 |
| 31. 82517 | 13596 | 29396 | 45237 |
| 31. 85143 | 13625 | 29342 | 45253 |
| 31. 87769 | 13591 | 29447 | 45195 |

|           |       |       |       |
|-----------|-------|-------|-------|
| 31. 90395 | 13661 | 29400 | 45239 |
| 31. 93021 | 13615 | 29412 | 45256 |
| 31. 95647 | 13671 | 29361 | 45191 |
| 31. 98273 | 13593 | 29393 | 45244 |
| 32. 00899 | 13662 | 29371 | 45260 |
| 32. 03525 | 13661 | 29354 | 45247 |
| 32. 06151 | 13668 | 29337 | 45280 |
| 32. 08777 | 13631 | 29326 | 45267 |
| 32. 11403 | 13579 | 29343 | 45228 |
| 32. 14029 | 13609 | 29340 | 45231 |
| 32. 16655 | 13653 | 29316 | 45250 |
| 32. 19282 | 13629 | 29364 | 45173 |
| 32. 21908 | 13641 | 29338 | 45331 |
| 32. 24534 | 13624 | 29345 | 45278 |
| 32. 2716  | 13613 | 29378 | 45257 |
| 32. 29786 | 13639 | 29336 | 45273 |
| 32. 32412 | 13618 | 29290 | 45280 |
| 32. 35038 | 13655 | 29371 | 45259 |
| 32. 37664 | 13668 | 29312 | 45286 |
| 32. 4029  | 13664 | 29410 | 45247 |
| 32. 42916 | 13706 | 29414 | 45316 |
| 32. 45542 | 13648 | 29336 | 45249 |
| 32. 48168 | 13689 | 29310 | 45303 |
| 32. 50794 | 13669 | 29271 | 45319 |
| 32. 5342  | 13738 | 29315 | 45311 |
| 32. 56046 | 13734 | 29356 | 45333 |
| 32. 58672 | 13811 | 29283 | 45378 |
| 32. 61298 | 13799 | 29326 | 45375 |
| 32. 63925 | 13810 | 29360 | 45481 |
| 32. 66551 | 13899 | 29387 | 45427 |
| 32. 69177 | 13911 | 29315 | 45563 |
| 32. 71803 | 14044 | 29340 | 45583 |
| 32. 74429 | 14116 | 29334 | 45653 |
| 32. 77055 | 14190 | 29345 | 45638 |
| 32. 79681 | 14305 | 29362 | 45887 |
| 32. 82307 | 14282 | 29281 | 45877 |
| 32. 84933 | 14336 | 29345 | 45920 |
| 32. 87559 | 14352 | 29242 | 46174 |
| 32. 90185 | 14289 | 29339 | 46050 |
| 32. 92811 | 14099 | 29297 | 46170 |
| 32. 95437 | 14105 | 29340 | 46206 |
| 32. 98063 | 14024 | 29318 | 46073 |
| 33. 00689 | 13862 | 29386 | 45955 |
| 33. 03315 | 13839 | 29266 | 45800 |
| 33. 05941 | 13798 | 29298 | 45665 |
| 33. 08567 | 13821 | 29339 | 45577 |
| 33. 11194 | 13770 | 29366 | 45454 |
| 33. 1382  | 13785 | 29356 | 45471 |
| 33. 16446 | 13724 | 29354 | 45372 |
| 33. 19072 | 13712 | 29288 | 45441 |
| 33. 21698 | 13721 | 29382 | 45315 |
| 33. 24324 | 13621 | 29279 | 45330 |
| 33. 2695  | 13648 | 29247 | 45288 |
| 33. 29576 | 13615 | 29304 | 45238 |

|           |       |       |       |
|-----------|-------|-------|-------|
| 33. 32202 | 13650 | 29315 | 45256 |
| 33. 34828 | 13637 | 29337 | 45286 |
| 33. 37454 | 13558 | 29326 | 45232 |
| 33. 4008  | 13595 | 29312 | 45198 |
| 33. 42706 | 13626 | 29312 | 45224 |
| 33. 45332 | 13611 | 29301 | 45141 |
| 33. 47958 | 13575 | 29366 | 45177 |
| 33. 50584 | 13555 | 29332 | 45172 |
| 33. 5321  | 13627 | 29205 | 45174 |
| 33. 55836 | 13557 | 29281 | 45118 |
| 33. 58463 | 13554 | 29229 | 45114 |
| 33. 61089 | 13583 | 29372 | 45129 |
| 33. 63715 | 13511 | 29288 | 45184 |
| 33. 66341 | 13582 | 29345 | 45126 |
| 33. 68967 | 13565 | 29259 | 45177 |
| 33. 71593 | 13585 | 29291 | 45197 |
| 33. 74219 | 13609 | 29246 | 45115 |
| 33. 76845 | 13590 | 29306 | 45147 |
| 33. 79471 | 13552 | 29351 | 45232 |
| 33. 82097 | 13557 | 29273 | 45170 |
| 33. 84723 | 13574 | 29240 | 45189 |
| 33. 87349 | 13535 | 29230 | 45126 |
| 33. 89975 | 13514 | 29289 | 45073 |
| 33. 92601 | 13549 | 29331 | 45061 |
| 33. 95227 | 13519 | 29263 | 45081 |
| 33. 97853 | 13541 | 29316 | 45106 |
| 34. 00479 | 13551 | 29244 | 45107 |
| 34. 03106 | 13529 | 29281 | 45121 |
| 34. 05732 | 13485 | 29253 | 45101 |
| 34. 08358 | 13487 | 29242 | 45059 |
| 34. 10984 | 13490 | 29334 | 45109 |
| 34. 1361  | 13488 | 29219 | 45135 |
| 34. 16236 | 13469 | 29316 | 45102 |
| 34. 18862 | 13461 | 29275 | 45093 |
| 34. 21488 | 13490 | 29382 | 45066 |
| 34. 24114 | 13505 | 29293 | 45058 |
| 34. 2674  | 13486 | 29267 | 45040 |
| 34. 29366 | 13510 | 29332 | 45131 |
| 34. 31992 | 13528 | 29421 | 45033 |
| 34. 34618 | 13514 | 29295 | 45032 |
| 34. 37244 | 13512 | 29248 | 45061 |
| 34. 3987  | 13448 | 29285 | 45011 |
| 34. 42496 | 13517 | 29237 | 44999 |
| 34. 45122 | 13470 | 29334 | 45006 |
| 34. 47748 | 13512 | 29318 | 45021 |
| 34. 50375 | 13502 | 29305 | 45052 |
| 34. 53001 | 13510 | 29217 | 45057 |
| 34. 55627 | 13491 | 29294 | 45012 |
| 34. 58253 | 13456 | 29302 | 45020 |
| 34. 60879 | 13488 | 29301 | 45069 |
| 34. 63505 | 13515 | 29291 | 45060 |
| 34. 66131 | 13522 | 29313 | 45076 |
| 34. 68757 | 13519 | 29244 | 45035 |
| 34. 71383 | 13501 | 29263 | 45072 |

|           |       |       |       |
|-----------|-------|-------|-------|
| 34. 74009 | 13475 | 29292 | 45095 |
| 34. 76635 | 13543 | 29317 | 45105 |
| 34. 79261 | 13578 | 29363 | 45061 |
| 34. 81887 | 13504 | 29268 | 45129 |
| 34. 84513 | 13595 | 29248 | 45095 |
| 34. 87139 | 13650 | 29266 | 45078 |
| 34. 89765 | 13576 | 29245 | 45161 |
| 34. 92391 | 13583 | 29282 | 45175 |
| 34. 95017 | 13568 | 29268 | 45141 |
| 34. 97644 | 13562 | 29234 | 45202 |
| 35. 0027  | 13514 | 29287 | 45161 |
| 35. 02896 | 13544 | 29335 | 45119 |
| 35. 05522 | 13539 | 29314 | 45172 |
| 35. 08148 | 13527 | 29250 | 45091 |
| 35. 10774 | 13521 | 29302 | 45091 |
| 35. 134   | 13520 | 29274 | 45034 |
| 35. 16026 | 13487 | 29283 | 45077 |
| 35. 18652 | 13489 | 29313 | 45031 |
| 35. 21278 | 13497 | 29306 | 45079 |
| 35. 23904 | 13542 | 29297 | 45060 |
| 35. 2653  | 13616 | 29249 | 45083 |
| 35. 29156 | 13586 | 29343 | 45102 |
| 35. 31782 | 13615 | 29305 | 45084 |
| 35. 34408 | 13635 | 29279 | 45091 |
| 35. 37034 | 13654 | 29286 | 45153 |
| 35. 3966  | 13607 | 29210 | 45203 |
| 35. 42286 | 13714 | 29217 | 45206 |
| 35. 44913 | 13696 | 29228 | 45247 |
| 35. 47539 | 13797 | 29329 | 45316 |
| 35. 50165 | 13842 | 29261 | 45355 |
| 35. 52791 | 13982 | 29358 | 45397 |
| 35. 55417 | 14078 | 29273 | 45544 |
| 35. 58043 | 14253 | 29282 | 45642 |
| 35. 60669 | 14416 | 29278 | 45753 |
| 35. 63295 | 14579 | 29260 | 45965 |
| 35. 65921 | 14893 | 29271 | 46230 |
| 35. 68547 | 14869 | 29360 | 46453 |
| 35. 71173 | 14908 | 29294 | 46735 |
| 35. 73799 | 14793 | 29343 | 46865 |
| 35. 76425 | 14582 | 29339 | 47042 |
| 35. 79051 | 14493 | 29308 | 47133 |
| 35. 81677 | 14263 | 29309 | 46910 |
| 35. 84303 | 14025 | 29275 | 46866 |
| 35. 86929 | 13948 | 29329 | 46614 |
| 35. 89556 | 13815 | 29296 | 46276 |
| 35. 92182 | 13795 | 29313 | 46123 |
| 35. 94808 | 13708 | 29267 | 45847 |
| 35. 97434 | 13655 | 29299 | 45685 |
| 36. 0006  | 13642 | 29244 | 45563 |
| 36. 02686 | 13571 | 29332 | 45429 |
| 36. 05312 | 13665 | 29288 | 45349 |
| 36. 07938 | 13538 | 29316 | 45289 |
| 36. 10564 | 13570 | 29281 | 45163 |
| 36. 1319  | 13559 | 29324 | 45212 |

|           |       |       |       |
|-----------|-------|-------|-------|
| 36. 15816 | 13509 | 29246 | 45106 |
| 36. 18442 | 13534 | 29224 | 45145 |
| 36. 21068 | 13597 | 29217 | 45109 |
| 36. 23694 | 13490 | 29262 | 45102 |
| 36. 2632  | 13558 | 29354 | 45048 |
| 36. 28946 | 13592 | 29257 | 45112 |
| 36. 31572 | 13549 | 29219 | 45129 |
| 36. 34198 | 13590 | 29211 | 45146 |
| 36. 36825 | 13625 | 29222 | 45140 |
| 36. 39451 | 13702 | 29322 | 45151 |
| 36. 42077 | 13775 | 29259 | 45233 |
| 36. 44703 | 13951 | 29270 | 45387 |
| 36. 47329 | 14091 | 29251 | 45528 |
| 36. 49955 | 14343 | 29303 | 45680 |
| 36. 52581 | 14711 | 29300 | 45862 |
| 36. 55207 | 15148 | 29313 | 46227 |
| 36. 57833 | 15543 | 29293 | 46559 |
| 36. 60459 | 15656 | 29259 | 46914 |
| 36. 63085 | 15399 | 29256 | 47353 |
| 36. 65711 | 14967 | 29276 | 47629 |
| 36. 68337 | 14822 | 29222 | 47967 |
| 36. 70963 | 14582 | 29262 | 47884 |
| 36. 73589 | 14209 | 29235 | 47596 |
| 36. 76215 | 13880 | 29242 | 47085 |
| 36. 78841 | 13683 | 29304 | 46728 |
| 36. 81467 | 13668 | 29263 | 46415 |
| 36. 84094 | 13548 | 29250 | 45977 |
| 36. 8672  | 13564 | 29281 | 45554 |
| 36. 89346 | 13557 | 29276 | 45366 |
| 36. 91972 | 13514 | 29224 | 45267 |
| 36. 94598 | 13499 | 29260 | 45140 |
| 36. 97224 | 13543 | 29212 | 45134 |
| 36. 9985  | 13536 | 29302 | 45087 |
| 37. 02476 | 13503 | 29251 | 45095 |
| 37. 05102 | 13543 | 29196 | 45049 |
| 37. 07728 | 13486 | 29166 | 44987 |
| 37. 10354 | 13477 | 29170 | 45048 |
| 37. 1298  | 13454 | 29228 | 45012 |
| 37. 15606 | 13468 | 29198 | 44976 |
| 37. 18232 | 13523 | 29241 | 45006 |
| 37. 20858 | 13499 | 29224 | 45052 |
| 37. 23484 | 13467 | 29248 | 44975 |
| 37. 2611  | 13392 | 29290 | 45003 |
| 37. 28737 | 13492 | 29171 | 45003 |
| 37. 31363 | 13486 | 29344 | 45013 |
| 37. 33989 | 13448 | 29229 | 44952 |
| 37. 36615 | 13450 | 29288 | 45041 |
| 37. 39241 | 13463 | 29317 | 44968 |
| 37. 41867 | 13485 | 29244 | 44994 |
| 37. 44493 | 13515 | 29206 | 45031 |
| 37. 47119 | 13480 | 29193 | 45007 |
| 37. 49745 | 13472 | 29210 | 44947 |
| 37. 52371 | 13487 | 29202 | 45058 |
| 37. 54997 | 13444 | 29224 | 45001 |

|           |       |       |       |
|-----------|-------|-------|-------|
| 37. 57623 | 13474 | 29175 | 44991 |
| 37. 60249 | 13531 | 29166 | 44995 |
| 37. 62875 | 13559 | 29200 | 45034 |
| 37. 65501 | 13508 | 29167 | 45029 |
| 37. 68127 | 13535 | 29238 | 45021 |
| 37. 70753 | 13628 | 29182 | 45094 |
| 37. 73379 | 13568 | 29138 | 45059 |
| 37. 76006 | 13602 | 29192 | 45075 |
| 37. 78632 | 13657 | 29245 | 45147 |
| 37. 81258 | 13716 | 29222 | 45191 |
| 37. 83884 | 13795 | 29217 | 45224 |
| 37. 8651  | 13900 | 29264 | 45344 |
| 37. 89136 | 14045 | 29208 | 45457 |
| 37. 91762 | 14216 | 29211 | 45539 |
| 37. 94388 | 14353 | 29188 | 45668 |
| 37. 97014 | 14614 | 29218 | 45844 |
| 37. 9964  | 14740 | 29230 | 46082 |
| 38. 02266 | 14888 | 29245 | 46379 |
| 38. 04892 | 14827 | 29262 | 46515 |
| 38. 07518 | 14619 | 29224 | 46742 |
| 38. 10144 | 14638 | 29226 | 46773 |
| 38. 1277  | 14422 | 29200 | 46993 |
| 38. 15396 | 14312 | 29174 | 47008 |
| 38. 18022 | 14111 | 29219 | 46721 |
| 38. 20648 | 13943 | 29163 | 46495 |
| 38. 23275 | 13799 | 29159 | 46280 |
| 38. 25901 | 13683 | 29150 | 46094 |
| 38. 28527 | 13566 | 29237 | 45827 |
| 38. 31153 | 13618 | 29182 | 45550 |
| 38. 33779 | 13565 | 29213 | 45434 |
| 38. 36405 | 13540 | 29221 | 45394 |
| 38. 39031 | 13541 | 29203 | 45243 |
| 38. 41657 | 13526 | 29197 | 45118 |
| 38. 44283 | 13485 | 29168 | 45130 |
| 38. 46909 | 13509 | 29168 | 45110 |
| 38. 49535 | 13481 | 29197 | 45054 |
| 38. 52161 | 13496 | 29153 | 45039 |
| 38. 54787 | 13504 | 29239 | 44989 |
| 38. 57413 | 13469 | 29207 | 45017 |
| 38. 60039 | 13452 | 29229 | 44955 |
| 38. 62665 | 13480 | 29159 | 44946 |
| 38. 65291 | 13458 | 29184 | 44994 |
| 38. 67918 | 13427 | 29138 | 44942 |
| 38. 70544 | 13496 | 29163 | 44937 |
| 38. 7317  | 13479 | 29215 | 44974 |
| 38. 75796 | 13467 | 29212 | 44905 |
| 38. 78422 | 13468 | 29228 | 45025 |
| 38. 81048 | 13470 | 29208 | 44900 |
| 38. 83674 | 13433 | 29208 | 44952 |
| 38. 863   | 13472 | 29167 | 44966 |
| 38. 88926 | 13494 | 29212 | 44909 |
| 38. 91552 | 13500 | 29173 | 44999 |
| 38. 94178 | 13448 | 29183 | 44931 |
| 38. 96804 | 13467 | 29172 | 44957 |

|           |       |       |       |
|-----------|-------|-------|-------|
| 38. 9943  | 13461 | 29187 | 44977 |
| 39. 02056 | 13431 | 29136 | 44965 |
| 39. 04682 | 13506 | 29193 | 45002 |
| 39. 07308 | 13542 | 29133 | 44996 |
| 39. 09934 | 13543 | 29182 | 44963 |
| 39. 1256  | 13574 | 29172 | 45024 |
| 39. 15187 | 13626 | 29062 | 45085 |
| 39. 17813 | 13677 | 29162 | 45145 |
| 39. 20439 | 13733 | 29243 | 45093 |
| 39. 23065 | 13726 | 29212 | 45190 |
| 39. 25691 | 13768 | 29230 | 45267 |
| 39. 28317 | 13760 | 29212 | 45324 |
| 39. 30943 | 13717 | 29180 | 45298 |
| 39. 33569 | 13669 | 29201 | 45341 |
| 39. 36195 | 13639 | 29149 | 45388 |
| 39. 38821 | 13551 | 29261 | 45371 |
| 39. 41447 | 13524 | 29145 | 45244 |
| 39. 44073 | 13525 | 29190 | 45230 |
| 39. 46699 | 13519 | 29179 | 45230 |
| 39. 49325 | 13513 | 29222 | 45093 |
| 39. 51951 | 13487 | 29168 | 45123 |
| 39. 54577 | 13497 | 29150 | 45020 |
| 39. 57203 | 13451 | 29157 | 44956 |
| 39. 59829 | 13407 | 29151 | 44947 |
| 39. 62456 | 13419 | 29170 | 44971 |
| 39. 65082 | 13408 | 29215 | 45001 |
| 39. 67708 | 13395 | 29209 | 44947 |
| 39. 70334 | 13402 | 29198 | 44913 |
| 39. 7296  | 13463 | 29100 | 44947 |
| 39. 75586 | 13406 | 29191 | 44914 |
| 39. 78212 | 13419 | 29173 | 44830 |
| 39. 80838 | 13414 | 29173 | 44949 |
| 39. 83464 | 13410 | 29074 | 44927 |
| 39. 8609  | 13423 | 29123 | 44849 |
| 39. 88716 | 13434 | 29132 | 44963 |
| 39. 91342 | 13428 | 29118 | 44879 |
| 39. 93968 | 13402 | 29130 | 44880 |
| 39. 96594 | 13394 | 29099 | 44851 |
| 39. 9922  | 13410 | 29153 | 44869 |
| 40. 01846 | 13434 | 29211 | 44883 |
| 40. 04472 | 13380 | 29162 | 44874 |
| 40. 07099 | 13417 | 29219 | 44886 |
| 40. 09725 | 13394 | 29171 | 44872 |
| 40. 12351 | 13422 | 29166 | 44866 |
| 40. 14977 | 13423 | 29088 | 44908 |
| 40. 17603 | 13397 | 29112 | 44870 |
| 40. 20229 | 13410 | 29099 | 44862 |
| 40. 22855 | 13396 | 29164 | 44822 |
| 40. 25481 | 13381 | 29069 | 44867 |
| 40. 28107 | 13389 | 29145 | 44885 |
| 40. 30733 | 13407 | 29134 | 44899 |
| 40. 33359 | 13421 | 29103 | 44855 |
| 40. 35985 | 13400 | 29140 | 44902 |
| 40. 38611 | 13394 | 29105 | 44888 |

|           |       |       |       |
|-----------|-------|-------|-------|
| 40. 41237 | 13407 | 29131 | 44897 |
| 40. 43863 | 13363 | 29159 | 44873 |
| 40. 46489 | 13366 | 29101 | 44893 |
| 40. 49115 | 13374 | 29084 | 44856 |
| 40. 51741 | 13397 | 29123 | 44831 |
| 40. 54368 | 13353 | 29097 | 44846 |
| 40. 56994 | 13364 | 29142 | 44803 |
| 40. 5962  | 13371 | 29120 | 44883 |
| 40. 62246 | 13361 | 29042 | 44816 |
| 40. 64872 | 13371 | 29088 | 44829 |
| 40. 67498 | 13377 | 29064 | 44849 |
| 40. 70124 | 13402 | 29065 | 44868 |
| 40. 7275  | 13400 | 29213 | 44857 |
| 40. 75376 | 13398 | 29107 | 44866 |
| 40. 78002 | 13383 | 29089 | 44865 |
| 40. 80628 | 13397 | 29115 | 44836 |
| 40. 83254 | 13377 | 29185 | 44803 |
| 40. 8588  | 13405 | 29074 | 44867 |
| 40. 88506 | 13380 | 29134 | 44857 |
| 40. 91132 | 13395 | 29090 | 44790 |
| 40. 93758 | 13391 | 29123 | 44847 |
| 40. 96384 | 13414 | 29086 | 44852 |
| 40. 9901  | 13406 | 29096 | 44903 |
| 41. 01637 | 13377 | 29144 | 44881 |
| 41. 04263 | 13472 | 29110 | 44816 |
| 41. 06889 | 13405 | 29106 | 44901 |
| 41. 09515 | 13394 | 29079 | 44859 |
| 41. 12141 | 13408 | 29100 | 44902 |
| 41. 14767 | 13431 | 29103 | 44870 |
| 41. 17393 | 13402 | 29140 | 44806 |
| 41. 20019 | 13397 | 29024 | 44865 |
| 41. 22645 | 13398 | 29103 | 44826 |
| 41. 25271 | 13409 | 29050 | 44824 |
| 41. 27897 | 13375 | 29099 | 44787 |
| 41. 30523 | 13388 | 29111 | 44835 |
| 41. 33149 | 13410 | 29146 | 44834 |
| 41. 35775 | 13371 | 29109 | 44817 |
| 41. 38401 | 13362 | 29111 | 44857 |
| 41. 41027 | 13372 | 29089 | 44848 |
| 41. 43653 | 13399 | 29105 | 44804 |
| 41. 46279 | 13402 | 29096 | 44792 |
| 41. 48906 | 13369 | 29068 | 44918 |
| 41. 51532 | 13373 | 29100 | 44878 |
| 41. 54158 | 13397 | 29098 | 44856 |
| 41. 56784 | 13420 | 29109 | 44915 |
| 41. 5941  | 13428 | 29017 | 44870 |
| 41. 62036 | 13435 | 29069 | 44880 |
| 41. 64662 | 13432 | 29039 | 44888 |
| 41. 67288 | 13445 | 29092 | 44903 |
| 41. 69914 | 13448 | 29056 | 44895 |
| 41. 7254  | 13473 | 29082 | 44936 |
| 41. 75166 | 13488 | 29120 | 44998 |
| 41. 77792 | 13505 | 29077 | 44984 |
| 41. 80418 | 13436 | 29089 | 44950 |

|           |       |       |       |
|-----------|-------|-------|-------|
| 41. 83044 | 13402 | 29110 | 44873 |
| 41. 8567  | 13442 | 29031 | 44976 |
| 41. 88296 | 13432 | 29026 | 44908 |
| 41. 90922 | 13417 | 29115 | 44883 |
| 41. 93549 | 13359 | 29148 | 44910 |
| 41. 96175 | 13376 | 29111 | 44906 |
| 41. 98801 | 13386 | 29042 | 44810 |
| 42. 01427 | 13364 | 29089 | 44863 |
| 42. 04053 | 13403 | 29032 | 44823 |
| 42. 06679 | 13419 | 29059 | 44923 |
| 42. 09305 | 13380 | 29085 | 44839 |
| 42. 11931 | 13370 | 29055 | 44839 |
| 42. 14557 | 13386 | 29081 | 44877 |
| 42. 17183 | 13377 | 29066 | 44842 |
| 42. 19809 | 13384 | 29054 | 44853 |
| 42. 22435 | 13360 | 29032 | 44776 |
| 42. 25061 | 13360 | 29092 | 44812 |
| 42. 27687 | 13394 | 29014 | 44827 |
| 42. 30313 | 13391 | 29063 | 44861 |
| 42. 32939 | 13438 | 29066 | 44780 |
| 42. 35565 | 13402 | 29055 | 44854 |
| 42. 38191 | 13413 | 29073 | 44824 |
| 42. 40818 | 13416 | 29082 | 44835 |
| 42. 43444 | 13444 | 29072 | 44861 |
| 42. 4607  | 13470 | 29042 | 44863 |
| 42. 48696 | 13450 | 29003 | 44865 |
| 42. 51322 | 13471 | 29030 | 44836 |
| 42. 53948 | 13484 | 29025 | 44923 |
| 42. 56574 | 13573 | 29095 | 44892 |
| 42. 592   | 13532 | 29063 | 44925 |
| 42. 61826 | 13592 | 28990 | 45026 |
| 42. 64452 | 13532 | 28998 | 45010 |
| 42. 67078 | 13483 | 29026 | 45067 |
| 42. 69704 | 13485 | 29041 | 45060 |
| 42. 7233  | 13458 | 29084 | 44981 |
| 42. 74956 | 13447 | 29033 | 45026 |
| 42. 77582 | 13415 | 29059 | 44948 |
| 42. 80208 | 13355 | 29048 | 44929 |
| 42. 82834 | 13402 | 29020 | 44936 |
| 42. 8546  | 13404 | 29038 | 44968 |
| 42. 88087 | 13389 | 29020 | 44959 |
| 42. 90713 | 13378 | 29033 | 44910 |
| 42. 93339 | 13439 | 29016 | 44911 |
| 42. 95965 | 13419 | 29066 | 44917 |
| 42. 98591 | 13509 | 29098 | 44910 |
| 43. 01217 | 13521 | 29027 | 44887 |
| 43. 03843 | 13588 | 28970 | 44922 |
| 43. 06469 | 13689 | 29144 | 45030 |
| 43. 09095 | 13855 | 29029 | 45136 |
| 43. 11721 | 13965 | 29009 | 45213 |
| 43. 14347 | 14176 | 29026 | 45389 |
| 43. 16973 | 14251 | 29075 | 45546 |
| 43. 19599 | 14303 | 29069 | 45702 |
| 43. 22225 | 14099 | 29014 | 45905 |

|           |       |       |       |
|-----------|-------|-------|-------|
| 43. 24851 | 14013 | 29050 | 46007 |
| 43. 27477 | 13917 | 29048 | 46003 |
| 43. 30103 | 13834 | 29052 | 45918 |
| 43. 3273  | 13725 | 29030 | 45849 |
| 43. 35356 | 13652 | 28965 | 45684 |
| 43. 37982 | 13569 | 29035 | 45537 |
| 43. 40608 | 13497 | 29031 | 45421 |
| 43. 43234 | 13432 | 29023 | 45222 |
| 43. 4586  | 13372 | 29024 | 45190 |
| 43. 48486 | 13400 | 28989 | 45028 |
| 43. 51112 | 13403 | 29041 | 45029 |
| 43. 53738 | 13380 | 29025 | 44871 |
| 43. 56364 | 13329 | 28985 | 44840 |
| 43. 5899  | 13364 | 28988 | 44883 |
| 43. 61616 | 13403 | 28974 | 44801 |
| 43. 64242 | 13341 | 29000 | 44828 |
| 43. 66868 | 13382 | 28970 | 44782 |
| 43. 69494 | 13375 | 28974 | 44764 |
| 43. 7212  | 13365 | 28930 | 44825 |
| 43. 74746 | 13318 | 28969 | 44752 |
| 43. 77372 | 13363 | 29011 | 44774 |
| 43. 79999 | 13353 | 28962 | 44767 |
| 43. 82625 | 13318 | 29004 | 44742 |
| 43. 85251 | 13362 | 28951 | 44738 |
| 43. 87877 | 13328 | 28983 | 44760 |
| 43. 90503 | 13335 | 28963 | 44756 |
| 43. 93129 | 13337 | 28962 | 44765 |
| 43. 95755 | 13389 | 28994 | 44789 |
| 43. 98381 | 13356 | 28981 | 44725 |
| 44. 01007 | 13348 | 28959 | 44708 |
| 44. 03633 | 13340 | 29027 | 44770 |
| 44. 06259 | 13346 | 28975 | 44749 |
| 44. 08885 | 13313 | 28967 | 44745 |
| 44. 11511 | 13342 | 29025 | 44734 |
| 44. 14137 | 13339 | 29041 | 44714 |
| 44. 16763 | 13357 | 28952 | 44775 |
| 44. 19389 | 13330 | 29015 | 44793 |
| 44. 22015 | 13328 | 28952 | 44800 |
| 44. 24641 | 13370 | 28948 | 44747 |
| 44. 27268 | 13370 | 28940 | 44800 |
| 44. 29894 | 13360 | 28960 | 44745 |
| 44. 3252  | 13344 | 28997 | 44703 |
| 44. 35146 | 13342 | 28977 | 44754 |
| 44. 37772 | 13313 | 28960 | 44764 |
| 44. 40398 | 13371 | 28937 | 44768 |
| 44. 43024 | 13365 | 28929 | 44693 |
| 44. 4565  | 13366 | 28966 | 44763 |
| 44. 48276 | 13323 | 28939 | 44744 |
| 44. 50902 | 13382 | 28917 | 44736 |
| 44. 53528 | 13330 | 28879 | 44734 |
| 44. 56154 | 13325 | 28909 | 44764 |
| 44. 5878  | 13367 | 28911 | 44792 |
| 44. 61406 | 13393 | 29009 | 44762 |
| 44. 64032 | 13373 | 28916 | 44815 |

|           |       |       |       |
|-----------|-------|-------|-------|
| 44. 66658 | 13384 | 29001 | 44816 |
| 44. 69284 | 13357 | 28967 | 44798 |
| 44. 71911 | 13411 | 28940 | 44816 |
| 44. 74537 | 13415 | 28914 | 44850 |
| 44. 77163 | 13442 | 28947 | 44932 |
| 44. 79789 | 13499 | 28924 | 44911 |
| 44. 82415 | 13553 | 28914 | 45048 |
| 44. 85041 | 13678 | 28935 | 45035 |
| 44. 87667 | 13762 | 28912 | 45112 |
| 44. 90293 | 13813 | 28944 | 45239 |
| 44. 92919 | 13731 | 28929 | 45324 |
| 44. 95545 | 13688 | 28960 | 45339 |
| 44. 98171 | 13663 | 28996 | 45408 |
| 45. 00797 | 13624 | 28946 | 45481 |
| 45. 03423 | 13591 | 28893 | 45394 |
| 45. 06049 | 13525 | 28952 | 45384 |
| 45. 08675 | 13498 | 28953 | 45355 |
| 45. 11301 | 13465 | 28910 | 45208 |
| 45. 13927 | 13421 | 28959 | 45105 |
| 45. 16553 | 13448 | 28863 | 45090 |
| 45. 1918  | 13390 | 29021 | 44995 |
| 45. 21806 | 13462 | 28931 | 45002 |
| 45. 24432 | 13433 | 28990 | 44969 |
| 45. 27058 | 13453 | 28918 | 44955 |
| 45. 29684 | 13444 | 28950 | 44910 |
| 45. 3231  | 13450 | 28890 | 44986 |
| 45. 34936 | 13444 | 28921 | 44917 |
| 45. 37562 | 13474 | 28985 | 44918 |
| 45. 40188 | 13506 | 28911 | 44965 |
| 45. 42814 | 13515 | 28923 | 44910 |
| 45. 4544  | 13522 | 28902 | 44961 |
| 45. 48066 | 13554 | 28947 | 44970 |
| 45. 50692 | 13581 | 28948 | 44947 |
| 45. 53318 | 13548 | 28990 | 45031 |
| 45. 55944 | 13574 | 28845 | 45017 |
| 45. 5857  | 13510 | 28889 | 45095 |
| 45. 61196 | 13526 | 28895 | 45113 |
| 45. 63822 | 13494 | 28950 | 45072 |
| 45. 66449 | 13459 | 28940 | 44991 |
| 45. 69075 | 13484 | 28893 | 45044 |
| 45. 71701 | 13430 | 28898 | 44949 |
| 45. 74327 | 13379 | 28913 | 44913 |
| 45. 76953 | 13395 | 28920 | 44891 |
| 45. 79579 | 13399 | 28913 | 44894 |
| 45. 82205 | 13367 | 28904 | 44874 |
| 45. 84831 | 13338 | 28876 | 44811 |
| 45. 87457 | 13357 | 28926 | 44783 |
| 45. 90083 | 13357 | 28912 | 44766 |
| 45. 92709 | 13331 | 28967 | 44786 |
| 45. 95335 | 13354 | 28902 | 44721 |
| 45. 97961 | 13341 | 28871 | 44712 |
| 46. 00587 | 13365 | 28921 | 44733 |
| 46. 03213 | 13315 | 28913 | 44758 |
| 46. 05839 | 13345 | 28899 | 44781 |

|           |       |       |       |
|-----------|-------|-------|-------|
| 46. 08465 | 13309 | 28871 | 44765 |
| 46. 11092 | 13357 | 28897 | 44744 |
| 46. 13718 | 13339 | 28884 | 44778 |
| 46. 16344 | 13305 | 28872 | 44672 |
| 46. 1897  | 13326 | 28887 | 44827 |
| 46. 21596 | 13362 | 28861 | 44701 |
| 46. 24222 | 13355 | 28892 | 44744 |
| 46. 26848 | 13396 | 28859 | 44785 |
| 46. 29474 | 13371 | 28901 | 44834 |
| 46. 321   | 13405 | 28876 | 44735 |
| 46. 34726 | 13383 | 28875 | 44828 |
| 46. 37352 | 13486 | 28832 | 44744 |
| 46. 39978 | 13427 | 28823 | 44835 |
| 46. 42604 | 13412 | 28853 | 44826 |
| 46. 4523  | 13379 | 28898 | 44835 |
| 46. 47856 | 13394 | 28876 | 44846 |
| 46. 50482 | 13394 | 28879 | 44817 |
| 46. 53108 | 13432 | 28864 | 44856 |
| 46. 55734 | 13405 | 28874 | 44855 |
| 46. 58361 | 13342 | 28887 | 44795 |
| 46. 60987 | 13348 | 28891 | 44885 |
| 46. 63613 | 13377 | 28861 | 44833 |
| 46. 66239 | 13365 | 28880 | 44826 |
| 46. 68865 | 13367 | 28917 | 44767 |
| 46. 71491 | 13373 | 28903 | 44767 |
| 46. 74117 | 13332 | 28824 | 44692 |
| 46. 76743 | 13330 | 28844 | 44715 |
| 46. 79369 | 13351 | 28912 | 44735 |
| 46. 81995 | 13339 | 28885 | 44685 |
| 46. 84621 | 13349 | 28869 | 44706 |
| 46. 87247 | 13313 | 28875 | 44709 |
| 46. 89873 | 13327 | 28919 | 44741 |
| 46. 92499 | 13375 | 28902 | 44723 |
| 46. 95125 | 13319 | 28868 | 44762 |
| 46. 97751 | 13347 | 28921 | 44716 |
| 47. 00377 | 13347 | 28848 | 44716 |
| 47. 03003 | 13339 | 28871 | 44776 |
| 47. 0563  | 13362 | 28853 | 44792 |
| 47. 08256 | 13366 | 28878 | 44775 |
| 47. 10882 | 13351 | 28899 | 44754 |
| 47. 13508 | 13386 | 28853 | 44755 |
| 47. 16134 | 13368 | 28848 | 44772 |
| 47. 1876  | 13420 | 28832 | 44835 |
| 47. 21386 | 13518 | 28944 | 44873 |
| 47. 24012 | 13481 | 28869 | 44831 |
| 47. 26638 | 13516 | 28853 | 44886 |
| 47. 29264 | 13510 | 28871 | 44938 |
| 47. 3189  | 13491 | 28824 | 44946 |
| 47. 34516 | 13501 | 28877 | 45027 |
| 47. 37142 | 13464 | 28869 | 45027 |
| 47. 39768 | 13539 | 28887 | 44953 |
| 47. 42394 | 13477 | 28875 | 44940 |
| 47. 4502  | 13515 | 28857 | 44996 |
| 47. 47646 | 13472 | 28899 | 45043 |

|           |       |       |       |
|-----------|-------|-------|-------|
| 47. 50273 | 13514 | 28847 | 45005 |
| 47. 52899 | 13515 | 28933 | 45017 |
| 47. 55525 | 13522 | 28878 | 45063 |
| 47. 58151 | 13467 | 28812 | 44978 |
| 47. 60777 | 13496 | 28845 | 45020 |
| 47. 63403 | 13487 | 28864 | 45101 |
| 47. 66029 | 13474 | 28866 | 44996 |
| 47. 68655 | 13505 | 28854 | 44978 |
| 47. 71281 | 13487 | 28817 | 45020 |
| 47. 73907 | 13511 | 28824 | 44993 |
| 47. 76533 | 13614 | 28900 | 45002 |
| 47. 79159 | 13600 | 28852 | 44965 |
| 47. 81785 | 13613 | 28867 | 45000 |
| 47. 84411 | 13683 | 28827 | 45072 |
| 47. 87037 | 13741 | 28876 | 45073 |
| 47. 89663 | 13747 | 28823 | 45104 |
| 47. 92289 | 13746 | 28812 | 45165 |
| 47. 94915 | 13709 | 28800 | 45242 |
| 47. 97542 | 13632 | 28826 | 45273 |
| 48. 00168 | 13635 | 28839 | 45317 |
| 48. 02794 | 13548 | 28823 | 45212 |
| 48. 0542  | 13501 | 28867 | 45259 |
| 48. 08046 | 13479 | 28839 | 45104 |
| 48. 10672 | 13396 | 28791 | 45088 |
| 48. 13298 | 13414 | 28771 | 45006 |
| 48. 15924 | 13434 | 28816 | 44974 |
| 48. 1855  | 13390 | 28855 | 44902 |
| 48. 21176 | 13369 | 28831 | 44834 |
| 48. 23802 | 13325 | 28856 | 44823 |
| 48. 26428 | 13373 | 28791 | 44794 |
| 48. 29054 | 13336 | 28852 | 44736 |
| 48. 3168  | 13340 | 28805 | 44789 |
| 48. 34306 | 13343 | 28814 | 44709 |
| 48. 36932 | 13327 | 28882 | 44696 |
| 48. 39558 | 13321 | 28821 | 44727 |
| 48. 42184 | 13327 | 28854 | 44694 |
| 48. 44811 | 13352 | 28812 | 44695 |
| 48. 47437 | 13344 | 28865 | 44719 |
| 48. 50063 | 13350 | 28834 | 44735 |
| 48. 52689 | 13339 | 28792 | 44690 |
| 48. 55315 | 13345 | 28837 | 44648 |
| 48. 57941 | 13311 | 28825 | 44674 |
| 48. 60567 | 13338 | 28785 | 44680 |
| 48. 63193 | 13323 | 28759 | 44709 |
| 48. 65819 | 13340 | 28842 | 44677 |
| 48. 68445 | 13330 | 28828 | 44624 |
| 48. 71071 | 13312 | 28807 | 44651 |
| 48. 73697 | 13307 | 28768 | 44645 |
| 48. 76323 | 13335 | 28765 | 44620 |
| 48. 78949 | 13330 | 28794 | 44637 |
| 48. 81575 | 13306 | 28798 | 44659 |
| 48. 84201 | 13305 | 28800 | 44657 |
| 48. 86827 | 13311 | 28803 | 44663 |
| 48. 89453 | 13282 | 28787 | 44645 |

|           |       |       |       |
|-----------|-------|-------|-------|
| 48. 9208  | 13324 | 28806 | 44630 |
| 48. 94706 | 13325 | 28756 | 44709 |
| 48. 97332 | 13315 | 28735 | 44657 |
| 48. 99958 | 13330 | 28800 | 44712 |
| 49. 02584 | 13306 | 28783 | 44699 |
| 49. 0521  | 13274 | 28755 | 44677 |
| 49. 07836 | 13319 | 28733 | 44680 |
| 49. 10462 | 13349 | 28771 | 44612 |
| 49. 13088 | 13320 | 28727 | 44698 |
| 49. 15714 | 13285 | 28767 | 44684 |
| 49. 1834  | 13296 | 28743 | 44714 |
| 49. 20966 | 13323 | 28765 | 44667 |
| 49. 23592 | 13323 | 28771 | 44658 |
| 49. 26218 | 13348 | 28793 | 44644 |
| 49. 28844 | 13336 | 28711 | 44644 |
| 49. 3147  | 13348 | 28746 | 44648 |
| 49. 34096 | 13335 | 28797 | 44673 |
| 49. 36723 | 13328 | 28854 | 44629 |
| 49. 39349 | 13347 | 28836 | 44705 |
| 49. 41975 | 13342 | 28738 | 44747 |
| 49. 44601 | 13341 | 28773 | 44713 |
| 49. 47227 | 13388 | 28777 | 44695 |
| 49. 49853 | 13384 | 28745 | 44729 |
| 49. 52479 | 13434 | 28802 | 44751 |
| 49. 55105 | 13441 | 28777 | 44899 |
| 49. 57731 | 13493 | 28755 | 44771 |
| 49. 60357 | 13461 | 28750 | 44869 |
| 49. 62983 | 13549 | 28757 | 44872 |
| 49. 65609 | 13595 | 28770 | 44912 |
| 49. 68235 | 13695 | 28790 | 44946 |
| 49. 70861 | 13797 | 28785 | 45069 |
| 49. 73487 | 13823 | 28699 | 45172 |
| 49. 76113 | 13807 | 28720 | 45187 |
| 49. 78739 | 13802 | 28759 | 45310 |
| 49. 81365 | 13767 | 28768 | 45347 |
| 49. 83992 | 13675 | 28754 | 45454 |
| 49. 86618 | 13678 | 28734 | 45334 |
| 49. 89244 | 13675 | 28741 | 45369 |
| 49. 9187  | 13650 | 28782 | 45219 |
| 49. 94496 | 13543 | 28744 | 45326 |
| 49. 97122 | 13477 | 28746 | 45151 |
| 49. 99748 | 13437 | 28702 | 45095 |
| 50. 02374 | 13404 | 28739 | 45054 |
| 50. 05    | 13390 | 28780 | 44991 |
| 50. 07626 | 13386 | 28745 | 44916 |
| 50. 10252 | 13370 | 28769 | 44846 |
| 50. 12878 | 13347 | 28720 | 44818 |
| 50. 15504 | 13341 | 28693 | 44785 |
| 50. 1813  | 13380 | 28686 | 44758 |
| 50. 20756 | 13358 | 28727 | 44791 |
| 50. 23382 | 13374 | 28713 | 44751 |
| 50. 26008 | 13385 | 28763 | 44760 |
| 50. 28634 | 13360 | 28736 | 44743 |
| 50. 31261 | 13392 | 28799 | 44760 |

|           |       |       |       |
|-----------|-------|-------|-------|
| 50. 33887 | 13319 | 28711 | 44773 |
| 50. 36513 | 13382 | 28710 | 44787 |
| 50. 39139 | 13359 | 28676 | 44774 |
| 50. 41765 | 13358 | 28746 | 44759 |
| 50. 44391 | 13335 | 28711 | 44746 |
| 50. 47017 | 13287 | 28735 | 44737 |
| 50. 49643 | 13350 | 28734 | 44683 |
| 50. 52269 | 13306 | 28710 | 44687 |
| 50. 54895 | 13331 | 28720 | 44702 |
| 50. 57521 | 13324 | 28669 | 44642 |
| 50. 60147 | 13308 | 28713 | 44658 |
| 50. 62773 | 13288 | 28740 | 44650 |
| 50. 65399 | 13306 | 28725 | 44683 |
| 50. 68025 | 13314 | 28709 | 44658 |
| 50. 70651 | 13314 | 28680 | 44653 |
| 50. 73277 | 13313 | 28706 | 44636 |
| 50. 75904 | 13304 | 28757 | 44619 |
| 50. 7853  | 13325 | 28711 | 44665 |
| 50. 81156 | 13328 | 28701 | 44677 |
| 50. 83782 | 13311 | 28727 | 44604 |
| 50. 86408 | 13281 | 28680 | 44627 |
| 50. 89034 | 13306 | 28713 | 44618 |
| 50. 9166  | 13264 | 28749 | 44592 |
| 50. 94286 | 13320 | 28714 | 44607 |
| 50. 96912 | 13291 | 28695 | 44614 |
| 50. 99538 | 13302 | 28738 | 44584 |
| 51. 02164 | 13292 | 28776 | 44572 |
| 51. 0479  | 13262 | 28733 | 44590 |
| 51. 07416 | 13296 | 28748 | 44606 |
| 51. 10042 | 13281 | 28723 | 44661 |
| 51. 12668 | 13306 | 28660 | 44572 |
| 51. 15294 | 13281 | 28748 | 44629 |
| 51. 1792  | 13300 | 28696 | 44592 |
| 51. 20546 | 13301 | 28702 | 44578 |
| 51. 23173 | 13307 | 28732 | 44598 |
| 51. 25799 | 13297 | 28633 | 44614 |
| 51. 28425 | 13285 | 28690 | 44572 |
| 51. 31051 | 13281 | 28679 | 44588 |
| 51. 33677 | 13275 | 28715 | 44575 |
| 51. 36303 | 13277 | 28671 | 44605 |
| 51. 38929 | 13260 | 28667 | 44634 |
| 51. 41555 | 13254 | 28653 | 44583 |
| 51. 44181 | 13242 | 28699 | 44642 |
| 51. 46807 | 13298 | 28699 | 44596 |
| 51. 49433 | 13307 | 28711 | 44654 |
| 51. 52059 | 13272 | 28690 | 44626 |
| 51. 54685 | 13274 | 28705 | 44600 |
| 51. 57311 | 13281 | 28689 | 44639 |
| 51. 59937 | 13296 | 28688 | 44640 |
| 51. 62563 | 13276 | 28736 | 44621 |
| 51. 65189 | 13262 | 28663 | 44610 |
| 51. 67815 | 13285 | 28672 | 44617 |
| 51. 70442 | 13318 | 28700 | 44636 |
| 51. 73068 | 13295 | 28709 | 44706 |

|           |       |       |       |
|-----------|-------|-------|-------|
| 51. 75694 | 13288 | 28653 | 44622 |
| 51. 7832  | 13299 | 28675 | 44642 |
| 51. 80946 | 13376 | 28631 | 44633 |
| 51. 83572 | 13364 | 28696 | 44665 |
| 51. 86198 | 13408 | 28664 | 44655 |
| 51. 88824 | 13384 | 28704 | 44723 |
| 51. 9145  | 13392 | 28652 | 44717 |
| 51. 94076 | 13419 | 28695 | 44748 |
| 51. 96702 | 13479 | 28657 | 44802 |
| 51. 99328 | 13494 | 28703 | 44873 |
| 52. 01954 | 13525 | 28655 | 44849 |
| 52. 0458  | 13552 | 28675 | 44928 |
| 52. 07206 | 13516 | 28677 | 44961 |
| 52. 09832 | 13586 | 28642 | 44972 |
| 52. 12458 | 13582 | 28706 | 45063 |
| 52. 15085 | 13555 | 28691 | 44978 |
| 52. 17711 | 13513 | 28702 | 44981 |
| 52. 20337 | 13526 | 28704 | 45002 |
| 52. 22963 | 13507 | 28657 | 45087 |
| 52. 25589 | 13485 | 28668 | 44992 |
| 52. 28215 | 13439 | 28601 | 44953 |
| 52. 30841 | 13429 | 28683 | 44999 |
| 52. 33467 | 13417 | 28667 | 44948 |
| 52. 36093 | 13449 | 28702 | 44928 |
| 52. 38719 | 13487 | 28681 | 44856 |
| 52. 41345 | 13404 | 28647 | 44814 |
| 52. 43971 | 13373 | 28680 | 44832 |
| 52. 46597 | 13397 | 28617 | 44802 |
| 52. 49223 | 13379 | 28651 | 44794 |
| 52. 51849 | 13346 | 28655 | 44778 |
| 52. 54475 | 13300 | 28707 | 44691 |
| 52. 57101 | 13303 | 28674 | 44769 |
| 52. 59727 | 13342 | 28707 | 44714 |
| 52. 62354 | 13326 | 28692 | 44688 |
| 52. 6498  | 13340 | 28623 | 44723 |
| 52. 67606 | 13364 | 28669 | 44684 |
| 52. 70232 | 13340 | 28676 | 44647 |
| 52. 72858 | 13346 | 28642 | 44716 |
| 52. 75484 | 13354 | 28625 | 44682 |
| 52. 7811  | 13338 | 28656 | 44699 |
| 52. 80736 | 13350 | 28675 | 44741 |
| 52. 83362 | 13332 | 28680 | 44707 |
| 52. 85988 | 13278 | 28631 | 44726 |
| 52. 88614 | 13309 | 28692 | 44701 |
| 52. 9124  | 13348 | 28707 | 44656 |
| 52. 93866 | 13303 | 28662 | 44642 |
| 52. 96492 | 13266 | 28612 | 44655 |
| 52. 99118 | 13296 | 28641 | 44589 |
| 53. 01744 | 13278 | 28642 | 44624 |
| 53. 0437  | 13280 | 28646 | 44608 |
| 53. 06996 | 13298 | 28658 | 44604 |
| 53. 09623 | 13272 | 28632 | 44610 |
| 53. 12249 | 13287 | 28624 | 44628 |
| 53. 14875 | 13275 | 28623 | 44615 |

|           |       |       |       |
|-----------|-------|-------|-------|
| 53. 17501 | 13286 | 28684 | 44593 |
| 53. 20127 | 13268 | 28673 | 44558 |
| 53. 22753 | 13275 | 28659 | 44592 |
| 53. 25379 | 13273 | 28673 | 44607 |
| 53. 28005 | 13258 | 28578 | 44620 |
| 53. 30631 | 13264 | 28656 | 44586 |
| 53. 33257 | 13283 | 28641 | 44617 |
| 53. 35883 | 13277 | 28652 | 44655 |
| 53. 38509 | 13294 | 28644 | 44588 |
| 53. 41135 | 13288 | 28625 | 44615 |
| 53. 43761 | 13314 | 28669 | 44612 |
| 53. 46387 | 13304 | 28613 | 44557 |
| 53. 49013 | 13307 | 28665 | 44591 |
| 53. 51639 | 13329 | 28660 | 44653 |
| 53. 54266 | 13268 | 28612 | 44612 |
| 53. 56892 | 13323 | 28683 | 44605 |
| 53. 59518 | 13344 | 28662 | 44638 |
| 53. 62144 | 13306 | 28611 | 44679 |
| 53. 6477  | 13334 | 28609 | 44646 |
| 53. 67396 | 13335 | 28622 | 44642 |
| 53. 70022 | 13348 | 28649 | 44673 |
| 53. 72648 | 13391 | 28630 | 44717 |
| 53. 75274 | 13396 | 28616 | 44708 |
| 53. 779   | 13359 | 28655 | 44723 |
| 53. 80526 | 13329 | 28643 | 44694 |
| 53. 83152 | 13372 | 28706 | 44714 |
| 53. 85778 | 13360 | 28646 | 44729 |
| 53. 88404 | 13357 | 28587 | 44697 |
| 53. 9103  | 13329 | 28660 | 44732 |
| 53. 93656 | 13371 | 28641 | 44682 |
| 53. 96282 | 13323 | 28591 | 44660 |
| 53. 98908 | 13339 | 28622 | 44723 |
| 54. 01535 | 13348 | 28611 | 44687 |
| 54. 04161 | 13273 | 28612 | 44584 |
| 54. 06787 | 13302 | 28624 | 44685 |
| 54. 09413 | 13324 | 28590 | 44650 |
| 54. 12039 | 13306 | 28652 | 44631 |
| 54. 14665 | 13303 | 28606 | 44604 |
| 54. 17291 | 13317 | 28590 | 44584 |
| 54. 19917 | 13276 | 28578 | 44562 |
| 54. 22543 | 13285 | 28596 | 44583 |
| 54. 25169 | 13240 | 28617 | 44622 |
| 54. 27795 | 13267 | 28618 | 44609 |
| 54. 30421 | 13282 | 28595 | 44602 |
| 54. 33047 | 13271 | 28632 | 44548 |
| 54. 35673 | 13269 | 28610 | 44581 |
| 54. 38299 | 13304 | 28604 | 44614 |
| 54. 40925 | 13288 | 28622 | 44603 |
| 54. 43551 | 13313 | 28621 | 44644 |
| 54. 46177 | 13314 | 28637 | 44584 |
| 54. 48804 | 13306 | 28652 | 44635 |
| 54. 5143  | 13310 | 28620 | 44650 |
| 54. 54056 | 13295 | 28609 | 44620 |
| 54. 56682 | 13306 | 28616 | 44584 |

|           |       |       |       |
|-----------|-------|-------|-------|
| 54. 59308 | 13374 | 28568 | 44655 |
| 54. 61934 | 13370 | 28636 | 44709 |
| 54. 6456  | 13392 | 28593 | 44693 |
| 54. 67186 | 13392 | 28596 | 44705 |
| 54. 69812 | 13432 | 28612 | 44759 |
| 54. 72438 | 13441 | 28633 | 44817 |
| 54. 75064 | 13427 | 28620 | 44923 |
| 54. 7769  | 13402 | 28584 | 44869 |
| 54. 80316 | 13400 | 28636 | 44866 |
| 54. 82942 | 13381 | 28646 | 44859 |
| 54. 85568 | 13400 | 28631 | 44873 |
| 54. 88194 | 13401 | 28659 | 44827 |
| 54. 9082  | 13408 | 28584 | 44792 |
| 54. 93447 | 13370 | 28662 | 44774 |
| 54. 96073 | 13344 | 28559 | 44802 |
| 54. 98699 | 13316 | 28593 | 44721 |
| 55. 01325 | 13350 | 28624 | 44784 |
| 55. 03951 | 13380 | 28564 | 44742 |
| 55. 06577 | 13339 | 28644 | 44697 |
| 55. 09203 | 13360 | 28610 | 44642 |
| 55. 11829 | 13325 | 28549 | 44708 |
| 55. 14455 | 13348 | 28611 | 44667 |
| 55. 17081 | 13399 | 28638 | 44742 |
| 55. 19707 | 13346 | 28583 | 44668 |
| 55. 22333 | 13369 | 28591 | 44633 |
| 55. 24959 | 13360 | 28584 | 44686 |
| 55. 27585 | 13378 | 28584 | 44729 |
| 55. 30211 | 13354 | 28631 | 44739 |
| 55. 32837 | 13384 | 28577 | 44712 |
| 55. 35463 | 13334 | 28579 | 44754 |
| 55. 38089 | 13376 | 28577 | 44687 |
| 55. 40716 | 13347 | 28643 | 44674 |
| 55. 43342 | 13318 | 28591 | 44666 |
| 55. 45968 | 13277 | 28586 | 44633 |
| 55. 48594 | 13271 | 28572 | 44632 |
| 55. 5122  | 13312 | 28591 | 44616 |
| 55. 53846 | 13283 | 28598 | 44615 |
| 55. 56472 | 13276 | 28596 | 44645 |
| 55. 59098 | 13282 | 28594 | 44575 |
| 55. 61724 | 13275 | 28573 | 44589 |
| 55. 6435  | 13226 | 28563 | 44590 |
| 55. 66976 | 13268 | 28609 | 44568 |
| 55. 69602 | 13224 | 28554 | 44561 |
| 55. 72228 | 13263 | 28557 | 44586 |
| 55. 74854 | 13267 | 28575 | 44573 |
| 55. 7748  | 13304 | 28573 | 44590 |
| 55. 80106 | 13302 | 28555 | 44577 |
| 55. 82732 | 13250 | 28589 | 44594 |
| 55. 85358 | 13252 | 28580 | 44561 |
| 55. 87985 | 13262 | 28614 | 44534 |
| 55. 90611 | 13244 | 28577 | 44532 |
| 55. 93237 | 13247 | 28616 | 44522 |
| 55. 95863 | 13269 | 28562 | 44526 |
| 55. 98489 | 13256 | 28616 | 44542 |

|           |       |       |       |
|-----------|-------|-------|-------|
| 56. 01115 | 13290 | 28562 | 44554 |
| 56. 03741 | 13268 | 28564 | 44498 |
| 56. 06367 | 13278 | 28576 | 44580 |
| 56. 08993 | 13280 | 28598 | 44570 |
| 56. 11619 | 13298 | 28545 | 44523 |
| 56. 14245 | 13303 | 28620 | 44534 |
| 56. 16871 | 13305 | 28574 | 44580 |
| 56. 19497 | 13269 | 28566 | 44571 |
| 56. 22123 | 13261 | 28596 | 44569 |
| 56. 24749 | 13264 | 28634 | 44556 |
| 56. 27375 | 13288 | 28607 | 44585 |
| 56. 30001 | 13323 | 28581 | 44564 |
| 56. 32627 | 13310 | 28540 | 44564 |
| 56. 35254 | 13298 | 28572 | 44630 |
| 56. 3788  | 13312 | 28581 | 44653 |
| 56. 40506 | 13349 | 28564 | 44634 |
| 56. 43132 | 13311 | 28579 | 44583 |
| 56. 45758 | 13349 | 28573 | 44644 |
| 56. 48384 | 13332 | 28543 | 44694 |
| 56. 5101  | 13370 | 28578 | 44673 |
| 56. 53636 | 13377 | 28550 | 44679 |
| 56. 56262 | 13380 | 28577 | 44814 |
| 56. 58888 | 13443 | 28604 | 44762 |
| 56. 61514 | 13508 | 28616 | 44764 |
| 56. 6414  | 13502 | 28567 | 44823 |
| 56. 66766 | 13495 | 28603 | 44896 |
| 56. 69392 | 13503 | 28547 | 44878 |
| 56. 72018 | 13522 | 28552 | 45006 |
| 56. 74644 | 13464 | 28539 | 44944 |
| 56. 7727  | 13498 | 28539 | 44931 |
| 56. 79897 | 13467 | 28526 | 44911 |
| 56. 82523 | 13456 | 28506 | 44916 |
| 56. 85149 | 13422 | 28594 | 44923 |
| 56. 87775 | 13413 | 28550 | 44871 |
| 56. 90401 | 13343 | 28569 | 44791 |
| 56. 93027 | 13309 | 28528 | 44871 |
| 56. 95653 | 13344 | 28496 | 44729 |
| 56. 98279 | 13309 | 28535 | 44847 |
| 57. 00905 | 13307 | 28529 | 44701 |
| 57. 03531 | 13280 | 28591 | 44665 |
| 57. 06157 | 13305 | 28588 | 44703 |
| 57. 08783 | 13321 | 28538 | 44634 |
| 57. 11409 | 13270 | 28588 | 44660 |
| 57. 14035 | 13280 | 28552 | 44623 |
| 57. 16661 | 13319 | 28565 | 44587 |
| 57. 19287 | 13294 | 28586 | 44564 |
| 57. 21913 | 13300 | 28558 | 44628 |
| 57. 24539 | 13265 | 28561 | 44600 |
| 57. 27166 | 13293 | 28616 | 44617 |
| 57. 29792 | 13285 | 28561 | 44601 |
| 57. 32418 | 13312 | 28564 | 44550 |
| 57. 35044 | 13348 | 28538 | 44581 |
| 57. 3767  | 13306 | 28578 | 44553 |
| 57. 40296 | 13354 | 28560 | 44580 |

|           |       |       |       |
|-----------|-------|-------|-------|
| 57. 42922 | 13390 | 28572 | 44685 |
| 57. 45548 | 13386 | 28536 | 44639 |
| 57. 48174 | 13389 | 28563 | 44676 |
| 57. 508   | 13368 | 28582 | 44674 |
| 57. 53426 | 13374 | 28588 | 44671 |
| 57. 56052 | 13343 | 28524 | 44688 |
| 57. 58678 | 13325 | 28543 | 44641 |
| 57. 61304 | 13325 | 28513 | 44647 |
| 57. 6393  | 13321 | 28541 | 44647 |
| 57. 66556 | 13286 | 28548 | 44634 |
| 57. 69182 | 13306 | 28510 | 44626 |
| 57. 71808 | 13297 | 28586 | 44590 |
| 57. 74435 | 13260 | 28565 | 44558 |
| 57. 77061 | 13323 | 28535 | 44606 |
| 57. 79687 | 13307 | 28554 | 44616 |
| 57. 82313 | 13268 | 28547 | 44633 |
| 57. 84939 | 13293 | 28539 | 44592 |
| 57. 87565 | 13256 | 28530 | 44572 |
| 57. 90191 | 13297 | 28546 | 44597 |
| 57. 92817 | 13268 | 28550 | 44563 |
| 57. 95443 | 13312 | 28563 | 44589 |
| 57. 98069 | 13327 | 28535 | 44584 |
| 58. 00695 | 13309 | 28544 | 44625 |
| 58. 03321 | 13313 | 28525 | 44619 |
| 58. 05947 | 13307 | 28547 | 44588 |
| 58. 08573 | 13310 | 28548 | 44631 |
| 58. 11199 | 13335 | 28542 | 44606 |
| 58. 13825 | 13325 | 28554 | 44664 |
| 58. 16451 | 13336 | 28539 | 44655 |
| 58. 19078 | 13361 | 28541 | 44629 |
| 58. 21704 | 13426 | 28538 | 44643 |
| 58. 2433  | 13405 | 28562 | 44731 |
| 58. 26956 | 13399 | 28547 | 44682 |
| 58. 29582 | 13370 | 28486 | 44695 |
| 58. 32208 | 13359 | 28523 | 44720 |
| 58. 34834 | 13379 | 28549 | 44708 |
| 58. 3746  | 13348 | 28544 | 44672 |
| 58. 40086 | 13380 | 28514 | 44706 |
| 58. 42712 | 13331 | 28534 | 44695 |
| 58. 45338 | 13350 | 28557 | 44660 |
| 58. 47964 | 13316 | 28533 | 44664 |
| 58. 5059  | 13306 | 28538 | 44662 |
| 58. 53216 | 13301 | 28540 | 44649 |
| 58. 55842 | 13304 | 28502 | 44558 |
| 58. 58468 | 13286 | 28493 | 44619 |
| 58. 61094 | 13265 | 28532 | 44639 |
| 58. 6372  | 13313 | 28550 | 44596 |
| 58. 66347 | 13289 | 28540 | 44603 |
| 58. 68973 | 13269 | 28530 | 44589 |
| 58. 71599 | 13295 | 28523 | 44576 |
| 58. 74225 | 13272 | 28544 | 44537 |
| 58. 76851 | 13298 | 28558 | 44548 |
| 58. 79477 | 13293 | 28514 | 44576 |
| 58. 82103 | 13314 | 28548 | 44549 |

|           |       |       |       |
|-----------|-------|-------|-------|
| 58. 84729 | 13292 | 28500 | 44559 |
| 58. 87355 | 13293 | 28533 | 44594 |
| 58. 89981 | 13284 | 28487 | 44596 |
| 58. 92607 | 13312 | 28510 | 44594 |
| 58. 95233 | 13321 | 28527 | 44561 |
| 58. 97859 | 13308 | 28508 | 44557 |
| 59. 00485 | 13298 | 28525 | 44564 |
| 59. 03111 | 13308 | 28566 | 44629 |
| 59. 05737 | 13328 | 28522 | 44569 |
| 59. 08363 | 13342 | 28498 | 44606 |
| 59. 10989 | 13323 | 28502 | 44638 |
| 59. 13616 | 13345 | 28482 | 44643 |
| 59. 16242 | 13310 | 28538 | 44619 |
| 59. 18868 | 13328 | 28517 | 44621 |
| 59. 21494 | 13359 | 28518 | 44636 |
| 59. 2412  | 13304 | 28483 | 44681 |
| 59. 26746 | 13321 | 28535 | 44666 |
| 59. 29372 | 13288 | 28496 | 44603 |
| 59. 31998 | 13318 | 28511 | 44602 |
| 59. 34624 | 13321 | 28513 | 44624 |
| 59. 3725  | 13323 | 28541 | 44612 |
| 59. 39876 | 13261 | 28519 | 44579 |
| 59. 42502 | 13326 | 28571 | 44612 |
| 59. 45128 | 13318 | 28513 | 44614 |
| 59. 47754 | 13314 | 28496 | 44621 |
| 59. 5038  | 13347 | 28490 | 44650 |
| 59. 53006 | 13329 | 28508 | 44626 |
| 59. 55632 | 13367 | 28497 | 44642 |
| 59. 58259 | 13403 | 28508 | 44692 |
| 59. 60885 | 13449 | 28581 | 44739 |
| 59. 63511 | 13406 | 28499 | 44756 |
| 59. 66137 | 13478 | 28478 | 44742 |
| 59. 68763 | 13518 | 28495 | 44811 |
| 59. 71389 | 13467 | 28490 | 44850 |
| 59. 74015 | 13525 | 28540 | 44952 |
| 59. 76641 | 13521 | 28498 | 44886 |
| 59. 79267 | 13495 | 28522 | 44911 |
| 59. 81893 | 13502 | 28512 | 44988 |
| 59. 84519 | 13443 | 28516 | 44963 |
| 59. 87145 | 13424 | 28521 | 44907 |
| 59. 89771 | 13373 | 28554 | 44922 |
| 59. 92397 | 13389 | 28555 | 44864 |
| 59. 95023 | 13376 | 28500 | 44821 |
| 59. 97649 | 13384 | 28478 | 44831 |
| 60. 00275 | 13350 | 28525 | 44769 |
| 60. 02901 | 13352 | 28530 | 44717 |
| 60. 05528 | 13292 | 28519 | 44677 |
| 60. 08154 | 13307 | 28474 | 44642 |
| 60. 1078  | 13301 | 28536 | 44626 |
| 60. 13406 | 13299 | 28452 | 44609 |
| 60. 16032 | 13283 | 28474 | 44657 |
| 60. 18658 | 13288 | 28538 | 44665 |
| 60. 21284 | 13285 | 28469 | 44607 |
| 60. 2391  | 13272 | 28526 | 44614 |

|           |       |       |       |
|-----------|-------|-------|-------|
| 60. 26536 | 13285 | 28489 | 44547 |
| 60. 29162 | 13302 | 28459 | 44592 |
| 60. 31788 | 13274 | 28490 | 44620 |
| 60. 34414 | 13293 | 28538 | 44560 |
| 60. 3704  | 13304 | 28524 | 44631 |
| 60. 39666 | 13343 | 28449 | 44621 |
| 60. 42292 | 13338 | 28493 | 44645 |
| 60. 44918 | 13301 | 28506 | 44618 |
| 60. 47544 | 13306 | 28509 | 44616 |
| 60. 5017  | 13352 | 28554 | 44628 |
| 60. 52797 | 13341 | 28546 | 44612 |
| 60. 55423 | 13327 | 28481 | 44673 |
| 60. 58049 | 13306 | 28445 | 44623 |
| 60. 60675 | 13273 | 28490 | 44656 |
| 60. 63301 | 13325 | 28473 | 44592 |
| 60. 65927 | 13327 | 28517 | 44621 |
| 60. 68553 | 13318 | 28478 | 44626 |
| 60. 71179 | 13299 | 28507 | 44636 |
| 60. 73805 | 13296 | 28503 | 44610 |
| 60. 76431 | 13245 | 28484 | 44631 |
| 60. 79057 | 13283 | 28506 | 44605 |
| 60. 81683 | 13258 | 28558 | 44589 |
| 60. 84309 | 13289 | 28492 | 44554 |
| 60. 86935 | 13279 | 28489 | 44570 |
| 60. 89561 | 13297 | 28456 | 44549 |
| 60. 92187 | 13293 | 28496 | 44587 |
| 60. 94813 | 13295 | 28501 | 44547 |
| 60. 9744  | 13280 | 28495 | 44583 |
| 61. 00066 | 13284 | 28516 | 44558 |
| 61. 02692 | 13254 | 28496 | 44555 |
| 61. 05318 | 13265 | 28486 | 44555 |
| 61. 07944 | 13315 | 28436 | 44554 |
| 61. 1057  | 13290 | 28502 | 44597 |
| 61. 13196 | 13317 | 28533 | 44604 |
| 61. 15822 | 13302 | 28476 | 44607 |
| 61. 18448 | 13320 | 28500 | 44626 |
| 61. 21074 | 13345 | 28458 | 44606 |
| 61. 237   | 13346 | 28523 | 44624 |
| 61. 26326 | 13355 | 28455 | 44694 |
| 61. 28952 | 13368 | 28515 | 44691 |
| 61. 31578 | 13395 | 28484 | 44704 |
| 61. 34204 | 13429 | 28470 | 44738 |
| 61. 3683  | 13414 | 28521 | 44783 |
| 61. 39456 | 13384 | 28437 | 44745 |
| 61. 42082 | 13418 | 28477 | 44772 |
| 61. 44709 | 13477 | 28501 | 44747 |
| 61. 47335 | 13500 | 28521 | 44775 |
| 61. 49961 | 13500 | 28496 | 44807 |
| 61. 52587 | 13522 | 28465 | 44848 |
| 61. 55213 | 13567 | 28535 | 44800 |
| 61. 57839 | 13550 | 28432 | 44833 |
| 61. 60465 | 13612 | 28491 | 44996 |
| 61. 63091 | 13550 | 28469 | 44866 |
| 61. 65717 | 13611 | 28478 | 44954 |

|           |       |       |       |
|-----------|-------|-------|-------|
| 61. 68343 | 13563 | 28463 | 44971 |
| 61. 70969 | 13617 | 28485 | 44953 |
| 61. 73595 | 13640 | 28477 | 44945 |
| 61. 76221 | 13604 | 28545 | 44931 |
| 61. 78847 | 13641 | 28495 | 44926 |
| 61. 81473 | 13632 | 28483 | 45010 |
| 61. 84099 | 13577 | 28505 | 44963 |
| 61. 86725 | 13549 | 28455 | 44959 |
| 61. 89351 | 13479 | 28458 | 44987 |
| 61. 91978 | 13506 | 28483 | 44932 |
| 61. 94604 | 13467 | 28502 | 44932 |
| 61. 9723  | 13426 | 28476 | 44862 |
| 61. 99856 | 13398 | 28469 | 44798 |
| 62. 02482 | 13392 | 28471 | 44755 |
| 62. 05108 | 13368 | 28451 | 44741 |
| 62. 07734 | 13309 | 28467 | 44708 |
| 62. 1036  | 13333 | 28485 | 44698 |
| 62. 12986 | 13313 | 28502 | 44656 |
| 62. 15612 | 13323 | 28497 | 44641 |
| 62. 18238 | 13283 | 28538 | 44584 |
| 62. 20864 | 13277 | 28491 | 44612 |
| 62. 2349  | 13290 | 28499 | 44519 |
| 62. 26116 | 13253 | 28437 | 44570 |
| 62. 28742 | 13290 | 28448 | 44563 |
| 62. 31368 | 13266 | 28481 | 44556 |
| 62. 33994 | 13255 | 28429 | 44537 |
| 62. 36621 | 13252 | 28462 | 44586 |
| 62. 39247 | 13269 | 28491 | 44527 |
| 62. 41873 | 13234 | 28499 | 44491 |
| 62. 44499 | 13263 | 28502 | 44496 |
| 62. 47125 | 13284 | 28471 | 44514 |
| 62. 49751 | 13274 | 28499 | 44507 |
| 62. 52377 | 13261 | 28464 | 44518 |
| 62. 55003 | 13260 | 28432 | 44559 |
| 62. 57629 | 13242 | 28507 | 44496 |
| 62. 60255 | 13227 | 28490 | 44525 |
| 62. 62881 | 13240 | 28468 | 44515 |
| 62. 65507 | 13256 | 28442 | 44533 |
| 62. 68133 | 13225 | 28511 | 44515 |
| 62. 70759 | 13249 | 28470 | 44530 |
| 62. 73385 | 13246 | 28451 | 44476 |
| 62. 76011 | 13240 | 28446 | 44517 |
| 62. 78637 | 13226 | 28445 | 44507 |
| 62. 81263 | 13254 | 28483 | 44503 |
| 62. 8389  | 13259 | 28421 | 44542 |
| 62. 86516 | 13263 | 28455 | 44549 |
| 62. 89142 | 13269 | 28428 | 44518 |
| 62. 91768 | 13266 | 28444 | 44522 |
| 62. 94394 | 13289 | 28513 | 44534 |
| 62. 9702  | 13276 | 28488 | 44544 |
| 62. 99646 | 13260 | 28464 | 44496 |
| 63. 02272 | 13284 | 28464 | 44588 |
| 63. 04898 | 13323 | 28467 | 44536 |
| 63. 07524 | 13309 | 28502 | 44540 |

|           |       |       |       |
|-----------|-------|-------|-------|
| 63. 1015  | 13315 | 28514 | 44578 |
| 63. 12776 | 13342 | 28489 | 44614 |
| 63. 15402 | 13341 | 28455 | 44620 |
| 63. 18028 | 13373 | 28468 | 44666 |
| 63. 20654 | 13446 | 28518 | 44671 |
| 63. 2328  | 13455 | 28450 | 44719 |
| 63. 25906 | 13532 | 28448 | 44729 |
| 63. 28532 | 13511 | 28472 | 44824 |
| 63. 31159 | 13522 | 28457 | 44806 |
| 63. 33785 | 13572 | 28424 | 44874 |
| 63. 36411 | 13588 | 28481 | 44863 |
| 63. 39037 | 13574 | 28476 | 44970 |
| 63. 41663 | 13617 | 28435 | 44996 |
| 63. 44289 | 13603 | 28407 | 44962 |
| 63. 46915 | 13515 | 28432 | 45011 |
| 63. 49541 | 13532 | 28486 | 44964 |
| 63. 52167 | 13454 | 28442 | 45007 |
| 63. 54793 | 13495 | 28466 | 44981 |
| 63. 57419 | 13489 | 28468 | 44986 |
| 63. 60045 | 13507 | 28478 | 44888 |
| 63. 62671 | 13512 | 28452 | 44927 |
| 63. 65297 | 13470 | 28453 | 44926 |
| 63. 67923 | 13574 | 28449 | 44928 |
| 63. 70549 | 13501 | 28445 | 44902 |
| 63. 73175 | 13580 | 28495 | 44873 |
| 63. 75801 | 13524 | 28463 | 44962 |
| 63. 78428 | 13485 | 28468 | 44912 |
| 63. 81054 | 13393 | 28474 | 44881 |
| 63. 8368  | 13406 | 28461 | 44865 |
| 63. 86306 | 13425 | 28472 | 44920 |
| 63. 88932 | 13403 | 28476 | 44805 |
| 63. 91558 | 13386 | 28496 | 44773 |
| 63. 94184 | 13355 | 28454 | 44722 |
| 63. 9681  | 13330 | 28454 | 44757 |
| 63. 99436 | 13349 | 28413 | 44639 |
| 64. 02062 | 13323 | 28464 | 44667 |
| 64. 04688 | 13296 | 28444 | 44606 |
| 64. 07314 | 13249 | 28446 | 44619 |
| 64. 0994  | 13257 | 28427 | 44575 |
| 64. 12566 | 13277 | 28475 | 44593 |
| 64. 15192 | 13233 | 28437 | 44502 |
| 64. 17818 | 13254 | 28492 | 44524 |
| 64. 20444 | 13256 | 28462 | 44534 |
| 64. 23071 | 13227 | 28448 | 44555 |
| 64. 25697 | 13264 | 28440 | 44541 |
| 64. 28323 | 13249 | 28425 | 44536 |
| 64. 30949 | 13227 | 28429 | 44454 |
| 64. 33575 | 13257 | 28429 | 44558 |
| 64. 36201 | 13254 | 28482 | 44563 |
| 64. 38827 | 13273 | 28420 | 44502 |
| 64. 41453 | 13262 | 28462 | 44467 |
| 64. 44079 | 13256 | 28441 | 44497 |
| 64. 46705 | 13262 | 28477 | 44525 |
| 64. 49331 | 13227 | 28451 | 44455 |

|           |       |       |       |
|-----------|-------|-------|-------|
| 64. 51957 | 13245 | 28495 | 44491 |
| 64. 54583 | 13228 | 28476 | 44489 |
| 64. 57209 | 13214 | 28489 | 44550 |
| 64. 59835 | 13236 | 28455 | 44509 |
| 64. 62461 | 13227 | 28479 | 44471 |
| 64. 65087 | 13254 | 28466 | 44508 |
| 64. 67713 | 13260 | 28486 | 44486 |
| 64. 7034  | 13263 | 28484 | 44506 |
| 64. 72966 | 13222 | 28453 | 44512 |
| 64. 75592 | 13242 | 28442 | 44449 |
| 64. 78218 | 13233 | 28432 | 44518 |
| 64. 80844 | 13265 | 28454 | 44504 |
| 64. 8347  | 13264 | 28445 | 44482 |
| 64. 86096 | 13247 | 28443 | 44506 |
| 64. 88722 | 13228 | 28464 | 44491 |
| 64. 91348 | 13234 | 28437 | 44537 |
| 64. 93974 | 13268 | 28415 | 44513 |
| 64. 966   | 13242 | 28438 | 44505 |
| 64. 99226 | 13273 | 28413 | 44516 |
| 65. 01852 | 13268 | 28447 | 44534 |
| 65. 04478 | 13261 | 28460 | 44587 |
| 65. 07104 | 13291 | 28425 | 44573 |
| 65. 0973  | 13301 | 28435 | 44543 |
| 65. 12356 | 13349 | 28469 | 44520 |
| 65. 14982 | 13312 | 28439 | 44562 |
| 65. 17609 | 13328 | 28483 | 44639 |
| 65. 20235 | 13344 | 28450 | 44639 |
| 65. 22861 | 13315 | 28451 | 44636 |
| 65. 25487 | 13320 | 28439 | 44684 |
| 65. 28113 | 13353 | 28393 | 44673 |
| 65. 30739 | 13362 | 28421 | 44687 |
| 65. 33365 | 13332 | 28416 | 44664 |
| 65. 35991 | 13332 | 28449 | 44667 |
| 65. 38617 | 13320 | 28408 | 44652 |
| 65. 41243 | 13321 | 28455 | 44660 |
| 65. 43869 | 13324 | 28457 | 44600 |
| 65. 46495 | 13313 | 28460 | 44658 |
| 65. 49121 | 13287 | 28485 | 44637 |
| 65. 51747 | 13317 | 28450 | 44613 |
| 65. 54373 | 13310 | 28423 | 44600 |
| 65. 56999 | 13305 | 28424 | 44629 |
| 65. 59625 | 13297 | 28435 | 44612 |
| 65. 62252 | 13285 | 28450 | 44589 |
| 65. 64878 | 13308 | 28459 | 44579 |
| 65. 67504 | 13261 | 28427 | 44632 |
| 65. 7013  | 13323 | 28438 | 44610 |
| 65. 72756 | 13299 | 28456 | 44622 |
| 65. 75382 | 13287 | 28458 | 44564 |
| 65. 78008 | 13283 | 28458 | 44562 |
| 65. 80634 | 13305 | 28436 | 44590 |
| 65. 8326  | 13299 | 28422 | 44618 |
| 65. 85886 | 13281 | 28442 | 44554 |
| 65. 88512 | 13325 | 28426 | 44639 |
| 65. 91138 | 13316 | 28447 | 44606 |

|           |       |       |       |
|-----------|-------|-------|-------|
| 65. 93764 | 13294 | 28417 | 44621 |
| 65. 9639  | 13277 | 28426 | 44603 |
| 65. 99016 | 13331 | 28443 | 44597 |
| 66. 01642 | 13325 | 28459 | 44647 |
| 66. 04268 | 13319 | 28446 | 44657 |
| 66. 06894 | 13307 | 28462 | 44612 |
| 66. 09521 | 13282 | 28447 | 44587 |
| 66. 12147 | 13273 | 28440 | 44584 |
| 66. 14773 | 13294 | 28443 | 44585 |
| 66. 17399 | 13316 | 28387 | 44560 |
| 66. 20025 | 13249 | 28436 | 44520 |
| 66. 22651 | 13256 | 28427 | 44533 |
| 66. 25277 | 13219 | 28453 | 44519 |
| 66. 27903 | 13220 | 28440 | 44525 |
| 66. 30529 | 13219 | 28449 | 44583 |
| 66. 33155 | 13249 | 28418 | 44555 |
| 66. 35781 | 13227 | 28452 | 44519 |
| 66. 38407 | 13238 | 28448 | 44526 |
| 66. 41033 | 13228 | 28395 | 44507 |
| 66. 43659 | 13237 | 28436 | 44523 |
| 66. 46285 | 13250 | 28470 | 44505 |
| 66. 48911 | 13253 | 28464 | 44499 |
| 66. 51537 | 13223 | 28460 | 44496 |
| 66. 54163 | 13210 | 28455 | 44526 |
| 66. 5679  | 13230 | 28454 | 44499 |
| 66. 59416 | 13232 | 28404 | 44454 |
| 66. 62042 | 13230 | 28427 | 44477 |
| 66. 64668 | 13191 | 28442 | 44424 |
| 66. 67294 | 13193 | 28462 | 44439 |
| 66. 6992  | 13235 | 28406 | 44439 |
| 66. 72546 | 13227 | 28407 | 44453 |
| 66. 75172 | 13225 | 28421 | 44485 |
| 66. 77798 | 13184 | 28430 | 44425 |
| 66. 80424 | 13221 | 28460 | 44440 |
| 66. 8305  | 13210 | 28438 | 44444 |
| 66. 85676 | 13218 | 28434 | 44451 |
| 66. 88302 | 13196 | 28451 | 44469 |
| 66. 90928 | 13215 | 28462 | 44431 |
| 66. 93554 | 13211 | 28411 | 44437 |
| 66. 9618  | 13212 | 28413 | 44453 |
| 66. 98806 | 13238 | 28439 | 44494 |
| 67. 01433 | 13242 | 28424 | 44443 |
| 67. 04059 | 13220 | 28448 | 44434 |
| 67. 06685 | 13220 | 28438 | 44437 |
| 67. 09311 | 13248 | 28437 | 44453 |
| 67. 11937 | 13237 | 28385 | 44487 |
| 67. 14563 | 13211 | 28444 | 44410 |
| 67. 17189 | 13217 | 28426 | 44453 |
| 67. 19815 | 13179 | 28461 | 44459 |
| 67. 22441 | 13235 | 28422 | 44472 |
| 67. 25067 | 13231 | 28443 | 44468 |
| 67. 27693 | 13200 | 28415 | 44464 |
| 67. 30319 | 13203 | 28402 | 44454 |
| 67. 32945 | 13232 | 28446 | 44463 |

|           |       |       |       |
|-----------|-------|-------|-------|
| 67. 35571 | 13248 | 28446 | 44515 |
| 67. 38197 | 13229 | 28410 | 44466 |
| 67. 40823 | 13215 | 28410 | 44458 |
| 67. 43449 | 13246 | 28463 | 44498 |
| 67. 46075 | 13232 | 28388 | 44452 |
| 67. 48702 | 13229 | 28433 | 44498 |
| 67. 51328 | 13205 | 28461 | 44440 |
| 67. 53954 | 13228 | 28469 | 44467 |
| 67. 5658  | 13277 | 28410 | 44477 |
| 67. 59206 | 13241 | 28431 | 44461 |
| 67. 61832 | 13241 | 28412 | 44481 |
| 67. 64458 | 13234 | 28395 | 44456 |
| 67. 67084 | 13223 | 28409 | 44438 |
| 67. 6971  | 13236 | 28450 | 44433 |
| 67. 72336 | 13226 | 28396 | 44449 |
| 67. 74962 | 13217 | 28443 | 44436 |
| 67. 77588 | 13212 | 28390 | 44484 |
| 67. 80214 | 13215 | 28398 | 44477 |
| 67. 8284  | 13252 | 28425 | 44506 |
| 67. 85466 | 13218 | 28405 | 44463 |
| 67. 88092 | 13213 | 28448 | 44525 |
| 67. 90718 | 13243 | 28430 | 44471 |
| 67. 93344 | 13249 | 28420 | 44452 |
| 67. 95971 | 13213 | 28432 | 44526 |
| 67. 98597 | 13218 | 28413 | 44434 |
| 68. 01223 | 13209 | 28429 | 44481 |
| 68. 03849 | 13211 | 28433 | 44492 |
| 68. 06475 | 13208 | 28445 | 44437 |
| 68. 09101 | 13222 | 28406 | 44458 |
| 68. 11727 | 13232 | 28379 | 44464 |
| 68. 14353 | 13208 | 28395 | 44489 |
| 68. 16979 | 13207 | 28397 | 44498 |
| 68. 19605 | 13227 | 28393 | 44471 |
| 68. 22231 | 13217 | 28421 | 44486 |
| 68. 24857 | 13211 | 28397 | 44463 |
| 68. 27483 | 13205 | 28400 | 44439 |
| 68. 30109 | 13198 | 28400 | 44481 |
| 68. 32735 | 13210 | 28364 | 44447 |
| 68. 35361 | 13216 | 28423 | 44407 |
| 68. 37987 | 13200 | 28430 | 44470 |
| 68. 40614 | 13252 | 28410 | 44459 |
| 68. 4324  | 13218 | 28440 | 44421 |
| 68. 45866 | 13205 | 28389 | 44443 |
| 68. 48492 | 13214 | 28413 | 44470 |
| 68. 51118 | 13243 | 28438 | 44419 |
| 68. 53744 | 13201 | 28422 | 44461 |
| 68. 5637  | 13237 | 28426 | 44464 |
| 68. 58996 | 13235 | 28434 | 44473 |
| 68. 61622 | 13233 | 28419 | 44476 |
| 68. 64248 | 13241 | 28436 | 44430 |
| 68. 66874 | 13246 | 28459 | 44505 |
| 68. 695   | 13229 | 28403 | 44473 |
| 68. 72126 | 13275 | 28415 | 44436 |
| 68. 74752 | 13259 | 28439 | 44448 |

|           |       |       |       |
|-----------|-------|-------|-------|
| 68. 77378 | 13249 | 28419 | 44444 |
| 68. 80004 | 13275 | 28410 | 44462 |
| 68. 8263  | 13244 | 28425 | 44485 |
| 68. 85256 | 13250 | 28442 | 44440 |
| 68. 87883 | 13219 | 28372 | 44457 |
| 68. 90509 | 13257 | 28416 | 44419 |
| 68. 93135 | 13256 | 28398 | 44458 |
| 68. 95761 | 13237 | 28407 | 44475 |
| 68. 98387 | 13249 | 28372 | 44469 |
| 69. 01013 | 13244 | 28432 | 44484 |
| 69. 03639 | 13239 | 28445 | 44464 |
| 69. 06265 | 13217 | 28424 | 44471 |
| 69. 08891 | 13275 | 28422 | 44496 |
| 69. 11517 | 13248 | 28469 | 44476 |
| 69. 14143 | 13211 | 28420 | 44481 |
| 69. 16769 | 13277 | 28406 | 44504 |
| 69. 19395 | 13225 | 28428 | 44513 |
| 69. 22021 | 13289 | 28420 | 44482 |
| 69. 24647 | 13293 | 28438 | 44476 |
| 69. 27273 | 13276 | 28393 | 44533 |
| 69. 29899 | 13285 | 28457 | 44529 |
| 69. 32525 | 13281 | 28425 | 44564 |
| 69. 35152 | 13269 | 28394 | 44551 |
| 69. 37778 | 13336 | 28425 | 44525 |
| 69. 40404 | 13303 | 28423 | 44619 |
| 69. 4303  | 13338 | 28438 | 44588 |
| 69. 45656 | 13367 | 28387 | 44607 |
| 69. 48282 | 13364 | 28417 | 44662 |
| 69. 50908 | 13348 | 28431 | 44647 |
| 69. 53534 | 13331 | 28374 | 44639 |
| 69. 5616  | 13350 | 28379 | 44611 |
| 69. 58786 | 13348 | 28425 | 44680 |
| 69. 61412 | 13315 | 28404 | 44655 |
| 69. 64038 | 13336 | 28415 | 44684 |
| 69. 66664 | 13313 | 28432 | 44630 |
| 69. 6929  | 13319 | 28422 | 44626 |
| 69. 71916 | 13294 | 28406 | 44629 |
| 69. 74542 | 13287 | 28398 | 44644 |
| 69. 77168 | 13280 | 28463 | 44567 |
| 69. 79795 | 13266 | 28404 | 44584 |
| 69. 82421 | 13287 | 28399 | 44595 |
| 69. 85047 | 13275 | 28462 | 44543 |
| 69. 87673 | 13255 | 28395 | 44573 |
| 69. 90299 | 13242 | 28427 | 44543 |
| 69. 92925 | 13234 | 28395 | 44531 |
| 69. 95551 | 13241 | 28406 | 44521 |
| 69. 98177 | 13261 | 28408 | 44559 |
| 70. 00803 | 13245 | 28455 | 44514 |
| 70. 03429 | 13264 | 28397 | 44516 |
| 70. 06055 | 13265 | 28382 | 44477 |
| 70. 08681 | 13240 | 28390 | 44501 |
| 70. 11307 | 13264 | 28385 | 44504 |
| 70. 13933 | 13226 | 28394 | 44561 |
| 70. 16559 | 13220 | 28418 | 44521 |

|           |       |       |       |
|-----------|-------|-------|-------|
| 70. 19185 | 13242 | 28423 | 44461 |
| 70. 21811 | 13219 | 28415 | 44509 |
| 70. 24437 | 13230 | 28387 | 44453 |
| 70. 27064 | 13239 | 28427 | 44480 |
| 70. 2969  | 13236 | 28388 | 44479 |
| 70. 32316 | 13264 | 28365 | 44460 |
| 70. 34942 | 13237 | 28422 | 44474 |
| 70. 37568 | 13237 | 28460 | 44463 |
| 70. 40194 | 13252 | 28432 | 44463 |
| 70. 4282  | 13308 | 28399 | 44504 |
| 70. 45446 | 13250 | 28409 | 44493 |
| 70. 48072 | 13254 | 28438 | 44455 |
| 70. 50698 | 13225 | 28349 | 44547 |
| 70. 53324 | 13223 | 28394 | 44472 |
| 70. 5595  | 13239 | 28407 | 44505 |
| 70. 58576 | 13230 | 28411 | 44456 |
| 70. 61202 | 13236 | 28371 | 44476 |
| 70. 63828 | 13255 | 28440 | 44529 |
| 70. 66454 | 13247 | 28389 | 44521 |
| 70. 6908  | 13247 | 28406 | 44502 |
| 70. 71706 | 13236 | 28378 | 44561 |
| 70. 74333 | 13280 | 28439 | 44548 |
| 70. 76959 | 13260 | 28404 | 44504 |
| 70. 79585 | 13265 | 28426 | 44550 |
| 70. 82211 | 13279 | 28408 | 44516 |
| 70. 84837 | 13239 | 28429 | 44537 |
| 70. 87463 | 13253 | 28379 | 44549 |
| 70. 90089 | 13290 | 28457 | 44526 |
| 70. 92715 | 13296 | 28402 | 44541 |
| 70. 95341 | 13277 | 28395 | 44489 |
| 70. 97967 | 13240 | 28395 | 44545 |
| 71. 00593 | 13257 | 28415 | 44502 |
| 71. 03219 | 13222 | 28388 | 44551 |
| 71. 05845 | 13227 | 28397 | 44458 |
| 71. 08471 | 13230 | 28389 | 44494 |
| 71. 11097 | 13224 | 28476 | 44473 |
| 71. 13723 | 13209 | 28403 | 44477 |
| 71. 16349 | 13222 | 28436 | 44470 |
| 71. 18975 | 13232 | 28386 | 44487 |
| 71. 21602 | 13218 | 28406 | 44461 |
| 71. 24228 | 13240 | 28411 | 44418 |
| 71. 26854 | 13193 | 28401 | 44464 |
| 71. 2948  | 13195 | 28420 | 44436 |
| 71. 32106 | 13228 | 28407 | 44465 |
| 71. 34732 | 13203 | 28403 | 44402 |
| 71. 37358 | 13203 | 28438 | 44486 |
| 71. 39984 | 13207 | 28420 | 44424 |
| 71. 4261  | 13237 | 28420 | 44451 |
| 71. 45236 | 13221 | 28406 | 44435 |
| 71. 47862 | 13193 | 28380 | 44410 |
| 71. 50488 | 13204 | 28387 | 44436 |
| 71. 53114 | 13215 | 28390 | 44414 |
| 71. 5574  | 13208 | 28412 | 44471 |
| 71. 58366 | 13217 | 28373 | 44418 |

|           |       |       |       |
|-----------|-------|-------|-------|
| 71. 60992 | 13218 | 28387 | 44462 |
| 71. 63618 | 13210 | 28384 | 44497 |
| 71. 66245 | 13212 | 28383 | 44471 |
| 71. 68871 | 13221 | 28364 | 44492 |
| 71. 71497 | 13206 | 28413 | 44424 |
| 71. 74123 | 13217 | 28408 | 44459 |
| 71. 76749 | 13215 | 28415 | 44436 |
| 71. 79375 | 13235 | 28404 | 44466 |
| 71. 82001 | 13283 | 28402 | 44449 |
| 71. 84627 | 13246 | 28399 | 44512 |
| 71. 87253 | 13277 | 28412 | 44530 |
| 71. 89879 | 13274 | 28404 | 44495 |
| 71. 92505 | 13268 | 28397 | 44578 |
| 71. 95131 | 13307 | 28353 | 44505 |
| 71. 97757 | 13306 | 28419 | 44549 |
| 72. 00383 | 13334 | 28381 | 44597 |
| 72. 03009 | 13381 | 28389 | 44657 |
| 72. 05635 | 13361 | 28395 | 44680 |
| 72. 08261 | 13341 | 28376 | 44632 |
| 72. 10887 | 13358 | 28349 | 44693 |
| 72. 13514 | 13358 | 28364 | 44733 |
| 72. 1614  | 13364 | 28382 | 44718 |
| 72. 18766 | 13371 | 28400 | 44696 |
| 72. 21392 | 13327 | 28349 | 44682 |
| 72. 24018 | 13367 | 28375 | 44667 |
| 72. 26644 | 13328 | 28368 | 44646 |
| 72. 2927  | 13322 | 28387 | 44685 |
| 72. 31896 | 13275 | 28405 | 44648 |
| 72. 34522 | 13322 | 28396 | 44613 |
| 72. 37148 | 13264 | 28407 | 44610 |
| 72. 39774 | 13251 | 28377 | 44620 |
| 72. 424   | 13229 | 28397 | 44557 |
| 72. 45026 | 13267 | 28408 | 44579 |
| 72. 47652 | 13240 | 28416 | 44543 |
| 72. 50278 | 13266 | 28375 | 44571 |
| 72. 52904 | 13243 | 28418 | 44471 |
| 72. 5553  | 13278 | 28409 | 44495 |
| 72. 58156 | 13244 | 28442 | 44483 |
| 72. 60783 | 13238 | 28409 | 44478 |
| 72. 63409 | 13249 | 28402 | 44493 |
| 72. 66035 | 13267 | 28417 | 44492 |
| 72. 68661 | 13254 | 28395 | 44492 |
| 72. 71287 | 13261 | 28377 | 44525 |
| 72. 73913 | 13288 | 28385 | 44537 |
| 72. 76539 | 13346 | 28412 | 44573 |
| 72. 79165 | 13281 | 28400 | 44563 |
| 72. 81791 | 13297 | 28409 | 44556 |
| 72. 84417 | 13312 | 28398 | 44565 |
| 72. 87043 | 13287 | 28380 | 44617 |
| 72. 89669 | 13287 | 28385 | 44596 |
| 72. 92295 | 13256 | 28415 | 44569 |
| 72. 94921 | 13276 | 28396 | 44540 |
| 72. 97547 | 13291 | 28391 | 44587 |
| 73. 00173 | 13255 | 28389 | 44542 |

|           |       |       |       |
|-----------|-------|-------|-------|
| 73. 02799 | 13231 | 28372 | 44530 |
| 73. 05426 | 13291 | 28371 | 44563 |
| 73. 08052 | 13264 | 28388 | 44549 |
| 73. 10678 | 13248 | 28404 | 44514 |
| 73. 13304 | 13276 | 28407 | 44488 |
| 73. 1593  | 13247 | 28389 | 44531 |
| 73. 18556 | 13226 | 28412 | 44503 |
| 73. 21182 | 13226 | 28410 | 44534 |
| 73. 23808 | 13255 | 28414 | 44491 |
| 73. 26434 | 13258 | 28394 | 44482 |
| 73. 2906  | 13234 | 28387 | 44485 |
| 73. 31686 | 13256 | 28416 | 44456 |
| 73. 34312 | 13277 | 28394 | 44471 |
| 73. 36938 | 13281 | 28393 | 44497 |
| 73. 39564 | 13279 | 28393 | 44481 |
| 73. 4219  | 13333 | 28366 | 44492 |
| 73. 44816 | 13317 | 28402 | 44524 |
| 73. 47442 | 13319 | 28377 | 44511 |
| 73. 50068 | 13303 | 28367 | 44574 |
| 73. 52695 | 13354 | 28401 | 44535 |
| 73. 55321 | 13285 | 28403 | 44604 |
| 73. 57947 | 13312 | 28367 | 44572 |
| 73. 60573 | 13311 | 28362 | 44570 |
| 73. 63199 | 13309 | 28424 | 44576 |
| 73. 65825 | 13357 | 28389 | 44588 |
| 73. 68451 | 13352 | 28364 | 44625 |
| 73. 71077 | 13335 | 28387 | 44589 |
| 73. 73703 | 13335 | 28412 | 44605 |
| 73. 76329 | 13343 | 28394 | 44614 |
| 73. 78955 | 13331 | 28365 | 44630 |
| 73. 81581 | 13332 | 28422 | 44579 |
| 73. 84207 | 13319 | 28393 | 44619 |
| 73. 86833 | 13332 | 28394 | 44620 |
| 73. 89459 | 13347 | 28386 | 44642 |
| 73. 92085 | 13321 | 28429 | 44615 |
| 73. 94711 | 13341 | 28348 | 44607 |
| 73. 97337 | 13359 | 28424 | 44598 |
| 73. 99964 | 13341 | 28355 | 44624 |
| 74. 0259  | 13308 | 28350 | 44624 |
| 74. 05216 | 13339 | 28395 | 44597 |
| 74. 07842 | 13363 | 28409 | 44621 |
| 74. 10468 | 13341 | 28352 | 44602 |
| 74. 13094 | 13338 | 28369 | 44562 |
| 74. 1572  | 13334 | 28385 | 44622 |
| 74. 18346 | 13350 | 28380 | 44620 |
| 74. 20972 | 13360 | 28376 | 44584 |
| 74. 23598 | 13331 | 28389 | 44551 |
| 74. 26224 | 13299 | 28428 | 44629 |
| 74. 2885  | 13292 | 28411 | 44559 |
| 74. 31476 | 13299 | 28434 | 44592 |
| 74. 34102 | 13299 | 28375 | 44586 |
| 74. 36728 | 13255 | 28388 | 44528 |
| 74. 39354 | 13270 | 28409 | 44544 |
| 74. 4198  | 13296 | 28403 | 44510 |

|           |       |       |       |
|-----------|-------|-------|-------|
| 74. 44607 | 13272 | 28397 | 44564 |
| 74. 47233 | 13246 | 28356 | 44485 |
| 74. 49859 | 13257 | 28388 | 44529 |
| 74. 52485 | 13250 | 28365 | 44494 |
| 74. 55111 | 13247 | 28392 | 44516 |
| 74. 57737 | 13217 | 28399 | 44529 |
| 74. 60363 | 13249 | 28432 | 44487 |
| 74. 62989 | 13231 | 28408 | 44479 |
| 74. 65615 | 13247 | 28388 | 44518 |
| 74. 68241 | 13271 | 28362 | 44495 |
| 74. 70867 | 13276 | 28383 | 44492 |
| 74. 73493 | 13258 | 28388 | 44455 |
| 74. 76119 | 13245 | 28377 | 44513 |
| 74. 78745 | 13274 | 28384 | 44476 |
| 74. 81371 | 13228 | 28379 | 44492 |
| 74. 83997 | 13271 | 28380 | 44522 |
| 74. 86623 | 13214 | 28415 | 44531 |
| 74. 89249 | 13262 | 28373 | 44514 |
| 74. 91876 | 13239 | 28412 | 44507 |
| 74. 94502 | 13235 | 28384 | 44461 |
| 74. 97128 | 13240 | 28400 | 44486 |
| 74. 99754 | 13202 | 28414 | 44460 |
| 75. 0238  | 13210 | 28402 | 44460 |
| 75. 05006 | 13240 | 28411 | 44459 |
| 75. 07632 | 13253 | 28420 | 44468 |
| 75. 10258 | 13243 | 28413 | 44471 |
| 75. 12884 | 13219 | 28396 | 44450 |
| 75. 1551  | 13236 | 28410 | 44501 |
| 75. 18136 | 13209 | 28391 | 44453 |
| 75. 20762 | 13202 | 28367 | 44467 |
| 75. 23388 | 13220 | 28405 | 44430 |
| 75. 26014 | 13221 | 28399 | 44454 |
| 75. 2864  | 13251 | 28378 | 44455 |
| 75. 31266 | 13272 | 28378 | 44512 |
| 75. 33892 | 13244 | 28364 | 44465 |
| 75. 36518 | 13239 | 28409 | 44466 |
| 75. 39145 | 13253 | 28408 | 44515 |
| 75. 41771 | 13290 | 28422 | 44500 |
| 75. 44397 | 13261 | 28387 | 44521 |
| 75. 47023 | 13301 | 28381 | 44562 |
| 75. 49649 | 13311 | 28354 | 44562 |
| 75. 52275 | 13328 | 28382 | 44617 |
| 75. 54901 | 13346 | 28400 | 44609 |
| 75. 57527 | 13330 | 28378 | 44611 |
| 75. 60153 | 13359 | 28402 | 44713 |
| 75. 62779 | 13316 | 28358 | 44664 |
| 75. 65405 | 13303 | 28368 | 44687 |
| 75. 68031 | 13354 | 28374 | 44644 |
| 75. 70657 | 13302 | 28349 | 44667 |
| 75. 73283 | 13287 | 28369 | 44599 |
| 75. 75909 | 13300 | 28392 | 44619 |
| 75. 78535 | 13299 | 28390 | 44632 |
| 75. 81161 | 13316 | 28412 | 44644 |
| 75. 83788 | 13290 | 28352 | 44607 |

|           |       |       |       |
|-----------|-------|-------|-------|
| 75. 86414 | 13288 | 28401 | 44623 |
| 75. 8904  | 13293 | 28380 | 44564 |
| 75. 91666 | 13283 | 28346 | 44571 |
| 75. 94292 | 13237 | 28380 | 44533 |
| 75. 96918 | 13286 | 28390 | 44538 |
| 75. 99544 | 13278 | 28376 | 44549 |
| 76. 0217  | 13287 | 28387 | 44530 |
| 76. 04796 | 13259 | 28383 | 44449 |
| 76. 07422 | 13238 | 28366 | 44508 |
| 76. 10048 | 13264 | 28381 | 44502 |
| 76. 12674 | 13249 | 28379 | 44535 |
| 76. 153   | 13240 | 28384 | 44452 |
| 76. 17926 | 13228 | 28395 | 44478 |
| 76. 20552 | 13229 | 28414 | 44489 |
| 76. 23178 | 13193 | 28385 | 44495 |
| 76. 25804 | 13217 | 28376 | 44468 |
| 76. 2843  | 13199 | 28339 | 44477 |
| 76. 31057 | 13238 | 28410 | 44438 |
| 76. 33683 | 13204 | 28402 | 44485 |
| 76. 36309 | 13211 | 28387 | 44474 |
| 76. 38935 | 13221 | 28386 | 44408 |
| 76. 41561 | 13248 | 28387 | 44489 |
| 76. 44187 | 13211 | 28384 | 44397 |
| 76. 46813 | 13227 | 28384 | 44423 |
| 76. 49439 | 13185 | 28381 | 44452 |
| 76. 52065 | 13197 | 28385 | 44426 |
| 76. 54691 | 13212 | 28375 | 44408 |
| 76. 57317 | 13234 | 28363 | 44416 |
| 76. 59943 | 13215 | 28391 | 44458 |
| 76. 62569 | 13218 | 28377 | 44476 |
| 76. 65195 | 13214 | 28404 | 44438 |
| 76. 67821 | 13220 | 28392 | 44461 |
| 76. 70447 | 13219 | 28393 | 44425 |
| 76. 73073 | 13212 | 28364 | 44384 |
| 76. 75699 | 13241 | 28387 | 44450 |
| 76. 78326 | 13225 | 28367 | 44417 |
| 76. 80952 | 13249 | 28377 | 44412 |
| 76. 83578 | 13201 | 28375 | 44440 |
| 76. 86204 | 13225 | 28364 | 44479 |
| 76. 8883  | 13246 | 28373 | 44458 |
| 76. 91456 | 13247 | 28379 | 44454 |
| 76. 94082 | 13228 | 28374 | 44455 |
| 76. 96708 | 13233 | 28368 | 44499 |
| 76. 99334 | 13266 | 28412 | 44461 |
| 77. 0196  | 13282 | 28378 | 44473 |
| 77. 04586 | 13261 | 28380 | 44525 |
| 77. 07212 | 13316 | 28395 | 44527 |
| 77. 09838 | 13329 | 28362 | 44560 |
| 77. 12464 | 13323 | 28379 | 44594 |
| 77. 1509  | 13320 | 28405 | 44533 |
| 77. 17716 | 13338 | 28373 | 44596 |
| 77. 20342 | 13329 | 28382 | 44557 |
| 77. 22969 | 13313 | 28341 | 44597 |
| 77. 25595 | 13356 | 28345 | 44584 |

|           |       |       |       |
|-----------|-------|-------|-------|
| 77. 28221 | 13345 | 28357 | 44625 |
| 77. 30847 | 13356 | 28363 | 44609 |
| 77. 33473 | 13341 | 28363 | 44646 |
| 77. 36099 | 13357 | 28385 | 44589 |
| 77. 38725 | 13323 | 28362 | 44631 |
| 77. 41351 | 13406 | 28365 | 44663 |
| 77. 43977 | 13376 | 28353 | 44671 |
| 77. 46603 | 13393 | 28335 | 44671 |
| 77. 49229 | 13349 | 28372 | 44658 |
| 77. 51855 | 13356 | 28386 | 44632 |
| 77. 54481 | 13359 | 28396 | 44604 |
| 77. 57107 | 13327 | 28374 | 44661 |
| 77. 59733 | 13331 | 28386 | 44628 |
| 77. 62359 | 13384 | 28371 | 44573 |
| 77. 64985 | 13369 | 28380 | 44600 |
| 77. 67611 | 13359 | 28417 | 44585 |
| 77. 70238 | 13308 | 28362 | 44621 |
| 77. 72864 | 13314 | 28361 | 44605 |
| 77. 7549  | 13324 | 28369 | 44618 |
| 77. 78116 | 13334 | 28409 | 44636 |
| 77. 80742 | 13340 | 28357 | 44625 |
| 77. 83368 | 13324 | 28368 | 44625 |
| 77. 85994 | 13339 | 28365 | 44636 |
| 77. 8862  | 13308 | 28341 | 44631 |
| 77. 91246 | 13327 | 28373 | 44596 |
| 77. 93872 | 13294 | 28343 | 44587 |
| 77. 96498 | 13287 | 28345 | 44604 |
| 77. 99124 | 13295 | 28358 | 44564 |
| 78. 0175  | 13301 | 28367 | 44636 |
| 78. 04376 | 13301 | 28383 | 44561 |
| 78. 07002 | 13262 | 28382 | 44626 |
| 78. 09628 | 13279 | 28388 | 44525 |
| 78. 12254 | 13262 | 28354 | 44529 |
| 78. 1488  | 13285 | 28379 | 44591 |
| 78. 17507 | 13274 | 28349 | 44495 |
| 78. 20133 | 13275 | 28385 | 44494 |
| 78. 22759 | 13222 | 28376 | 44498 |
| 78. 25385 | 13282 | 28332 | 44526 |
| 78. 28011 | 13199 | 28392 | 44487 |
| 78. 30637 | 13239 | 28370 | 44422 |
| 78. 33263 | 13232 | 28338 | 44466 |
| 78. 35889 | 13216 | 28325 | 44491 |
| 78. 38515 | 13245 | 28325 | 44439 |
| 78. 41141 | 13211 | 28387 | 44481 |
| 78. 43767 | 13203 | 28373 | 44499 |
| 78. 46393 | 13193 | 28383 | 44474 |
| 78. 49019 | 13236 | 28381 | 44456 |
| 78. 51645 | 13226 | 28365 | 44439 |
| 78. 54271 | 13241 | 28326 | 44455 |
| 78. 56897 | 13208 | 28331 | 44426 |
| 78. 59523 | 13229 | 28351 | 44424 |
| 78. 62149 | 13194 | 28353 | 44462 |
| 78. 64776 | 13220 | 28368 | 44444 |
| 78. 67402 | 13228 | 28353 | 44479 |

|           |       |       |       |
|-----------|-------|-------|-------|
| 78. 70028 | 13224 | 28376 | 44483 |
| 78. 72654 | 13270 | 28383 | 44460 |
| 78. 7528  | 13247 | 28387 | 44458 |
| 78. 77906 | 13259 | 28366 | 44485 |
| 78. 80532 | 13259 | 28371 | 44476 |
| 78. 83158 | 13275 | 28376 | 44513 |
| 78. 85784 | 13275 | 28369 | 44479 |
| 78. 8841  | 13275 | 28336 | 44536 |
| 78. 91036 | 13287 | 28374 | 44468 |
| 78. 93662 | 13250 | 28353 | 44526 |
| 78. 96288 | 13275 | 28395 | 44563 |
| 78. 98914 | 13293 | 28372 | 44566 |
| 79. 0154  | 13284 | 28326 | 44531 |
| 79. 04166 | 13334 | 28329 | 44558 |
| 79. 06792 | 13349 | 28357 | 44564 |
| 79. 09419 | 13341 | 28387 | 44555 |
| 79. 12045 | 13313 | 28415 | 44541 |
| 79. 14671 | 13370 | 28359 | 44574 |
| 79. 17297 | 13406 | 28406 | 44643 |
| 79. 19923 | 13424 | 28377 | 44609 |
| 79. 22549 | 13415 | 28363 | 44614 |
| 79. 25175 | 13393 | 28346 | 44644 |
| 79. 27801 | 13427 | 28339 | 44682 |
| 79. 30427 | 13392 | 28403 | 44632 |
| 79. 33053 | 13351 | 28364 | 44684 |
| 79. 35679 | 13393 | 28335 | 44679 |
| 79. 38305 | 13349 | 28365 | 44665 |
| 79. 40931 | 13375 | 28355 | 44687 |
| 79. 43557 | 13363 | 28340 | 44614 |
| 79. 46183 | 13363 | 28361 | 44626 |
| 79. 48809 | 13355 | 28373 | 44636 |
| 79. 51435 | 13340 | 28348 | 44605 |
| 79. 54061 | 13340 | 28338 | 44638 |
| 79. 56688 | 13351 | 28365 | 44553 |
| 79. 59314 | 13255 | 28346 | 44611 |
| 79. 6194  | 13268 | 28357 | 44492 |
| 79. 64566 | 13256 | 28373 | 44506 |
| 79. 67192 | 13301 | 28330 | 44561 |
| 79. 69818 | 13255 | 28395 | 44498 |
| 79. 72444 | 13240 | 28323 | 44554 |
| 79. 7507  | 13223 | 28342 | 44518 |
| 79. 77696 | 13227 | 28348 | 44576 |
| 79. 80322 | 13278 | 28352 | 44522 |
| 79. 82948 | 13245 | 28345 | 44477 |
| 79. 85574 | 13245 | 28370 | 44486 |
| 79. 882   | 13266 | 28361 | 44436 |
| 79. 90826 | 13225 | 28361 | 44458 |
| 79. 93452 | 13242 | 28358 | 44478 |
| 79. 96078 | 13236 | 28375 | 44468 |
| 79. 98704 | 13223 | 28332 | 44458 |
